# Supplementary material
Source: Research Square preprint supplement (doi:10.21203/rs.3.rs-8545290/v1)
Supplement: Supplementary file 1 [file 2953314416620e19670d6628.docx]

1. **Crise anglophone : la recette du Gicam pour réduire l’impact sur l’économie**

Le principal regroupement patronal du Cameroun propose tout un « Plan Marshall » pour le relèvement économique des régions du Nord-Ouest du Sud-Ouest.

[**EcoMatin**](https://ecomatin.net/author/admin8664/) [Suivre sur Twitter](https://twitter.com/ECOMatin1)[Envoyer un courriel](mailto:articles.ecomatin@gmail.com)1 octobre 2018Dernière mise à jour: 9 novembre 2021

 103 2 minutes de lecture

[Facebook](https://www.facebook.com/sharer.php?u=https://ecomatin.net/crise-anglophone-la-recette-du-gicam-pour-reduire-limpact-sur-leconomie/) [Twitter](https://twitter.com/intent/tweet?text=Crise%20anglophone%20%3A%20la%20recette%20du%20Gicam%20pour%20r%C3%A9duire%20l%E2%80%99impact%20sur%20l%E2%80%99%C3%A9conomie&url=https://ecomatin.net/crise-anglophone-la-recette-du-gicam-pour-reduire-limpact-sur-leconomie/) [Linkedin](https://www.linkedin.com/shareArticle?mini=true&url=https://ecomatin.net/crise-anglophone-la-recette-du-gicam-pour-reduire-limpact-sur-leconomie/&title=Crise%20anglophone%20%3A%20la%20recette%20du%20Gicam%20pour%20r%C3%A9duire%20l%E2%80%99impact%20sur%20l%E2%80%99%C3%A9conomie) [Tumblr](https://www.tumblr.com/share/link?url=https://ecomatin.net/crise-anglophone-la-recette-du-gicam-pour-reduire-limpact-sur-leconomie/&name=Crise%20anglophone%20%3A%20la%20recette%20du%20Gicam%20pour%20r%C3%A9duire%20l%E2%80%99impact%20sur%20l%E2%80%99%C3%A9conomie) [Pinterest](https://pinterest.com/pin/create/button/?url=https://ecomatin.net/crise-anglophone-la-recette-du-gicam-pour-reduire-limpact-sur-leconomie/&description=Crise%20anglophone%20%3A%20la%20recette%20du%20Gicam%20pour%20r%C3%A9duire%20l%E2%80%99impact%20sur%20l%E2%80%99%C3%A9conomie&media=https://ecomatin.net/wp-content/uploads/2018/10/ecomatin.net-crise-anglophone-la-recette-du-gicam-pour-reduire-limpact-sur-leconomie-crise-anglophone.jpg) [Reddit](https://reddit.com/submit?url=https://ecomatin.net/crise-anglophone-la-recette-du-gicam-pour-reduire-limpact-sur-leconomie/&title=Crise%20anglophone%20%3A%20la%20recette%20du%20Gicam%20pour%20r%C3%A9duire%20l%E2%80%99impact%20sur%20l%E2%80%99%C3%A9conomie) [VKontakte](https://vk.com/share.php?url=https://ecomatin.net/crise-anglophone-la-recette-du-gicam-pour-reduire-limpact-sur-leconomie/) [Odnoklassniki](https://connect.ok.ru/dk?st.cmd=WidgetSharePreview&st.shareUrl=https://ecomatin.net/crise-anglophone-la-recette-du-gicam-pour-reduire-limpact-sur-leconomie/&description=Crise%20anglophone%20%3A%20la%20recette%20du%20Gicam%20pour%20r%C3%A9duire%20l%E2%80%99impact%20sur%20l%E2%80%99%C3%A9conomie&media=https://ecomatin.net/wp-content/uploads/2018/10/ecomatin.net-crise-anglophone-la-recette-du-gicam-pour-reduire-limpact-sur-leconomie-crise-anglophone.jpg) [Pocket](https://getpocket.com/save?title=Crise%20anglophone%20%3A%20la%20recette%20du%20Gicam%20pour%20r%C3%A9duire%20l%E2%80%99impact%20sur%20l%E2%80%99%C3%A9conomie&url=https://ecomatin.net/crise-anglophone-la-recette-du-gicam-pour-reduire-limpact-sur-leconomie/)

La menace d’effondrement de l’économie camerounaise du fait de la crise socio-politique qui secoue les régions du Nord-Ouest et du Sud-Ouest du Cameroun est donc réelle. Et, le Groupement inter-patronal du Cameroun (Gicam), pour son étude sur les conséquences économiques et les impacts sur l’activité des entreprises, de l’insécurité dans ces régions au mois de juillet, va au-delà du simple constat. Mais le principal regroupement patronal du Cameroun propose des pistes pour réduire les impacts post-crise. La principale recette du Gicam est la mise en place d’un véritable « Plan Marshall » pour le relèvement économique de ces régions. De manière précise, le Gicam propose de remettre à niveau les infrastructures et équipements détruits, y compris par des subventions aux entités privées touchées ; mettre en place un plan de subventionnement massif des mastodontes agroindustrielles installées dans ces zones et particulièrement sinistrées (CDC, PAMOL, …); octroyer des appuis spécifiques aux producteurs agricoles pour reconstituer leurs matériel végétal et relancer les productions vivrières indispensables pour assurer la sécurité alimentaire des populations ; instaurer des incitations spécifiques et probantes pour les investissements réalisées dans ces Régions. Et enfin, relancer et intensifier la construction d’infrastructures publiques (écoles, routes, adduction d’eau, électrification, bâtiments administratifs, …) dans les deux régions.

Pour le Gicam, ces solutions sont à mettre en place en urgence, compte tenu du risque désormais grand de voir la dégradation se généraliser à l’ensemble de l’économie du pays, notamment via un resserrement excessif des conditions de crédits, au regard du contexte économique fragile (accumulation de déficits budgétaires publics suite à la chute drastique des cours de matières premières, pénuries de devises) dans laquelle cette crise est intervenue. Le Gicam estime donc que c’est l’ensemble du climat des affaires qui en souffre, impactant négativement l’attractivité du pays pour de nouveaux investisseurs avec des risques de délocalisation de certains investissements et le recul de la notation du Cameroun sur les classements internationaux (Doing business notamment). De l’avis du Gicam, la mise en œuvre d’un plan de mitigation est le moindre pour des entreprises écartelées par la crise, et en proie au spectre des dépôts de bilan et des licenciements massifs qui se profile pour l’ensemble d’entre elles, avec des risques sérieux de désagrégation économique et sociale de ces deux régions.

Dans le climat d’incertitude actuel, le Gicam pense qu’il est nécessaire de doper l’activité économique dans les autres régions afin d’amortir le choc du ralentissement observé dans le Nord-Ouest et le Sud-Ouest. De fait, la réalisation des objectifs de croissance convenus avec les partenaires internationaux dépend désormais de la capacité à éviter la propagation des effets de la crise et à assurer un rythme d’activité plus important dans les autres régions. A ce titre, il convient d’octroyer des autorisations spéciales d’importations de matières premières aux industries éprouvant des difficultés d’accès à ces régions ; le cas notamment des unités de transformation locale de cacao; tout mettre en œuvre pour préserver l’organisation de la CAN 2019 dont la tenue pourrait être hypothéquée par le climat d’insécurité et veiller à impliquer autant que possible les entreprises locales dans cet évènement ; accélérer le remboursement de la dette de l’Etat due aux PME ; accélérer certaines réformes sectorielles pour restaurer la confiance et offrir de la visibilité à moyen terme aux investisseurs ; observer une véritable pause fiscale en s’assurant notamment que la loi de finances 2019 n’introduise pas de contraintes et de pressions fiscales supplémentaires pour les entreprises, etc.

1. **Crise anglophone : l’économie camerounaise fortement menacée**

Selon les estimations du Groupement inter-patronal du Cameroun (Gicam), le manque à gagner pour les entreprises qui y sont installés est estimé à environ 269 milliards de FCFA, pour près de 8 000 emplois relevant du secteur formel menacés.

[**EcoMatin**](https://ecomatin.net/author/admin8664/) [Suivre sur Twitter](https://twitter.com/ECOMatin1)[Envoyer un courriel](mailto:articles.ecomatin@gmail.com)1 octobre 2018Dernière mise à jour: 9 novembre 2021

 184 4 minutes de lecture

[Facebook](https://www.facebook.com/sharer.php?u=https://ecomatin.net/cirse-anglophone-leconomie-camerounaise-fortement-menacee/) [Twitter](https://twitter.com/intent/tweet?text=Crise%20anglophone%20%3A%20l%E2%80%99%C3%A9conomie%20camerounaise%20fortement%20menac%C3%A9e&url=https://ecomatin.net/cirse-anglophone-leconomie-camerounaise-fortement-menacee/) [Linkedin](https://www.linkedin.com/shareArticle?mini=true&url=https://ecomatin.net/cirse-anglophone-leconomie-camerounaise-fortement-menacee/&title=Crise%20anglophone%20%3A%20l%E2%80%99%C3%A9conomie%20camerounaise%20fortement%20menac%C3%A9e) [Tumblr](https://www.tumblr.com/share/link?url=https://ecomatin.net/cirse-anglophone-leconomie-camerounaise-fortement-menacee/&name=Crise%20anglophone%20%3A%20l%E2%80%99%C3%A9conomie%20camerounaise%20fortement%20menac%C3%A9e) [Pinterest](https://pinterest.com/pin/create/button/?url=https://ecomatin.net/cirse-anglophone-leconomie-camerounaise-fortement-menacee/&description=Crise%20anglophone%20%3A%20l%E2%80%99%C3%A9conomie%20camerounaise%20fortement%20menac%C3%A9e&media=https://ecomatin.net/wp-content/uploads/2018/10/ecomatin.net-cirse-anglophone-leconomie-camerounaise-fortement-menacee-crisis.jpg) [Reddit](https://reddit.com/submit?url=https://ecomatin.net/cirse-anglophone-leconomie-camerounaise-fortement-menacee/&title=Crise%20anglophone%20%3A%20l%E2%80%99%C3%A9conomie%20camerounaise%20fortement%20menac%C3%A9e) [VKontakte](https://vk.com/share.php?url=https://ecomatin.net/cirse-anglophone-leconomie-camerounaise-fortement-menacee/) [Odnoklassniki](https://connect.ok.ru/dk?st.cmd=WidgetSharePreview&st.shareUrl=https://ecomatin.net/cirse-anglophone-leconomie-camerounaise-fortement-menacee/&description=Crise%20anglophone%20%3A%20l%E2%80%99%C3%A9conomie%20camerounaise%20fortement%20menac%C3%A9e&media=https://ecomatin.net/wp-content/uploads/2018/10/ecomatin.net-cirse-anglophone-leconomie-camerounaise-fortement-menacee-crisis.jpg) [Pocket](https://getpocket.com/save?title=Crise%20anglophone%20%3A%20l%E2%80%99%C3%A9conomie%20camerounaise%20fortement%20menac%C3%A9e&url=https://ecomatin.net/cirse-anglophone-leconomie-camerounaise-fortement-menacee/)


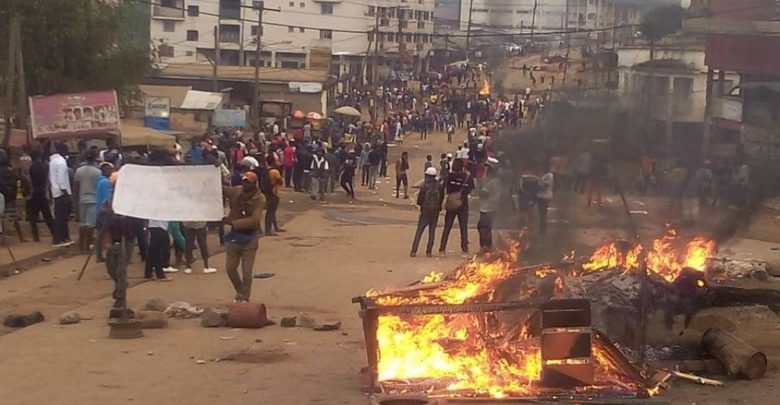


Il y a donc péril sur l’économie camerounaise en général. Les entreprises basées dans la région du Sud-Ouest et du Nord-Ouest paient un lourd tribut de la crise socio-politique qui y a cours. Selon les estimations du Groupement Inter-patronal du Cameroun (Gicam), qui a mené une étude sur les conséquences économiques et les impacts sur l’activité des entreprises, de l’insécurité dans les régions du Nord-Ouest et du Sud-Ouest au mois de juillet, cette crise a déjà coûté 2 153 192 651 F CFA de destructions de biens immobiliers, de matériels roulants et meubles. Pour un manque à gagner en termes de chiffres d’affaires estimé à 269 056 139 065 F CFA dans les secteurs investigués. Ce manque à gagner causé aux entreprises basées dans les régions anglophones, précise le Gicam implique de manière mécanique un manque à gagner immédiat de 5 919 235 059 F CFA de recettes fiscales pour l’Etat au titre de l’acompte de l’Impôt sur les sociétés (dont le taux est fixé à 2,2% calculé sur le chiffre d’affaires).

En termes d’emplois, les pertes sont essentiellement celles des entreprises agro industrielles. Dans l’ensemble, indique le Gicam, ce sont près de 8 000 emplois relevant du secteur formel qui sont aujourd’hui menacés en plus des 6 434 emplois déjà perdus sur les sites en arrêt de production des agro industries. Le principal regroupement syndical du Cameroun constate que les répercussions de la situation dans les régions du Sud-Ouest et du Nord-Ouest sur l’ensemble de l’économie sont particulièrement importantes compte tenu du positionnement spécifique de ces régions dans certaines filières de l’économie et surtout compte tenu du contexte spécifique dans lequel la crise est intervenue. En effet, la région du Sud-Ouest, en particulier, occupe une place économique très sensible pour certaines filières agricoles et accueille des investissements stratégiques importants. Cette crise par conséquent met profondément à mal des filières aval et se propage aux nombreux fournisseurs des mastodontes agro industrielles qui y sont installées. Les conséquences de la crise anglophone sur l’économie camerounaise sont d’autant plus néfastes que cette dernière est survenue alors que le Cameroun était dans un contexte de convalescence économique, rappelle le Gicam. En effet, le pays accusait encore le coup de la chute drastique des prix de matières premières.

Cette conjoncture internationale défavorable avait notamment fragilisé les fondements des finances publiques (déficit budgétaire passant de 2% du PIB en 2015 à 6,5% en 2016) et généré une accumulation de la dette et des arriérés de paiements de l’Etat, notamment auprès des entreprises. Ce qui a conduit le gouvernement à solliciter un appui du Fonds Monétaire International (FMI) pour un accompagnement budgétaire adossé sur un programme de réforme économique. Et, l’ajustement conduit dans ce cadre, fait remarquer le Gicam, s’est traduit en outre pas une pression fiscale de plus en plus forte sur les entreprises par la multiplication des prélèvements, l’intensification des contrôles, le durcissement des conditions de remboursement des sommes dues aux entreprises, y compris les crédits de TVA, etc. Concomitamment à cette pression, une autre difficulté avait déjà émergé et portait sur l’accès aux devises. Face à la pénurie des devises, les délais de traitements et de réponses aux demandes de devises faites par les banques commerciales à la banque centrale sont désormais incertains et vont de plusieurs semaines à plusieurs mois. Le Gicam craint même un risque de crédit crunch, vu la multiplication des limitations à l’octroi des crédits aux entreprises.

**56 milliards de pertes dans la Filière café-cacao**

L’agriculture est donc la principale victime économique de la crise socio-politique qui sévit dans les régions du Nord-Ouest et du Sud-Ouest, particulièrement la filière cacao-café.  Le Sud-Ouest et le Nord-Ouest sont notamment d’importants bassins de production de thé, de palmier à huile et surtout de cacao et de café. Le Gicam estime à 56 milliards de FCFA de pertes, soit 20% des recettes d’exportations, du fait de cette crise sécuritaire compte tenu de ses spécificités et de l’importance de ces régions dans la production de ces filières. Le Sud-Ouest représente notamment 45% de la production cacaoyère nationale, tandis que le Nord-Ouest est le principal bassin de production du café arabica avec plus de 70% de la production nationale. Dans la filière cacao en particulier, la hausse de production observée dans les autres zones de production et l’ingéniosité des certains acteurs ont réussi à maintenir un relatif flux de transaction et permettent de limiter les dégâts au cours de cette campagne 2017-2018.

Malgré tout, le Sud-ouest, relève le Gicam, a perdu sa première place dans la production nationale de cacao au bénéfice du Centre passant de 45,45% des ventes nationales de cacao à 32%, soit une perte de 43 000 tonnes sur la campagne 2017/2018. La perte financière qui en découle est de l’ordre de 56 milliards F CFA si en valeur recettes d’exportation (rapatriement de devises) dont 35 milliards de F CFA de recettes des agriculteurs du Sud-Ouest en considérant les cours du cacao sur le marché mondial. Le Gicam ajoute que la redistribution des primes aux planteurs est complètement compromise. Et, c’est près de 3 milliards F CFA de revenus des planteurs perdus. Le Gicam note que le contre-coût sera très important pour les campagnes à venir même en cas de rétablissement du climat sécuritaire car, de nombreuses plantations sont à l’abandon et une quantité considérable de l’équipement de production est désormais détruite. Le risque pour le 2018/2019, vue la situation encore plus critique qu’on constate en ces derniers mois de « mid crop » 2017/2018, est une perte entre 60 000 tonnes et 100 000 tonnes. Cela représenterait entre 78 et 130 milliards de FCFA en valeur recettes d’exportation (rapatriement de devises) dont entre 49 et 81 milliards de F CFA de recettes des agriculteurs du Sud-Ouest,  car l’insécurité et les déplacements de populations sont préjudiciables aux activités agricoles et à l’entretien des plantations. La quantité et la qualité de la production sont ainsi affectées ; l’entretien des plantations et les opérations post récolte étant réduites au minimum.

<https://ecomatin.net/cirse-anglophone-leconomie-camerounaise-fortement-menacee/>

1. **Crise anglophone : le plan secret des séparatistes contre les multinationales**

7 leaders séparatistes réunis aux Etats-Unis invitent les entreprises internationales à ne signer aucun contrat économique portant sur les richesses des régions du Sud et du Nord-Ouest, avec l'Etat du Cameroun. Ces deux régions anglophones, munies d'importantes ressources, mais en proie à des troubles sécuritaires, se retrouvent au centre d'une guerre économique.

[**EcoMatin**](https://ecomatin.net/author/admin8664/) [Suivre sur Twitter](https://twitter.com/ECOMatin1)[Envoyer un courriel](mailto:articles.ecomatin@gmail.com)4 octobre 2018Dernière mise à jour: 9 novembre 2021

 249 3 minutes de lecture

[Facebook](https://www.facebook.com/sharer.php?u=https://ecomatin.net/crise-anglophone-le-plan-secret-des-separatistes-contre-les-multinationales/) [Twitter](https://twitter.com/intent/tweet?text=Crise%20anglophone%20%3A%20le%20plan%20secret%20des%20s%C3%A9paratistes%20contre%20les%20multinationales&url=https://ecomatin.net/crise-anglophone-le-plan-secret-des-separatistes-contre-les-multinationales/) [Linkedin](https://www.linkedin.com/shareArticle?mini=true&url=https://ecomatin.net/crise-anglophone-le-plan-secret-des-separatistes-contre-les-multinationales/&title=Crise%20anglophone%20%3A%20le%20plan%20secret%20des%20s%C3%A9paratistes%20contre%20les%20multinationales) [Tumblr](https://www.tumblr.com/share/link?url=https://ecomatin.net/crise-anglophone-le-plan-secret-des-separatistes-contre-les-multinationales/&name=Crise%20anglophone%20%3A%20le%20plan%20secret%20des%20s%C3%A9paratistes%20contre%20les%20multinationales) [Pinterest](https://pinterest.com/pin/create/button/?url=https://ecomatin.net/crise-anglophone-le-plan-secret-des-separatistes-contre-les-multinationales/&description=Crise%20anglophone%20%3A%20le%20plan%20secret%20des%20s%C3%A9paratistes%20contre%20les%20multinationales&media=https://ecomatin.net/wp-content/uploads/2018/10/ecomatin.net-crise-anglophone-le-plan-secret-des-separatistes-contre-les-multinationales-secessionnistes.jpg) [Reddit](https://reddit.com/submit?url=https://ecomatin.net/crise-anglophone-le-plan-secret-des-separatistes-contre-les-multinationales/&title=Crise%20anglophone%20%3A%20le%20plan%20secret%20des%20s%C3%A9paratistes%20contre%20les%20multinationales) [VKontakte](https://vk.com/share.php?url=https://ecomatin.net/crise-anglophone-le-plan-secret-des-separatistes-contre-les-multinationales/) [Odnoklassniki](https://connect.ok.ru/dk?st.cmd=WidgetSharePreview&st.shareUrl=https://ecomatin.net/crise-anglophone-le-plan-secret-des-separatistes-contre-les-multinationales/&description=Crise%20anglophone%20%3A%20le%20plan%20secret%20des%20s%C3%A9paratistes%20contre%20les%20multinationales&media=https://ecomatin.net/wp-content/uploads/2018/10/ecomatin.net-crise-anglophone-le-plan-secret-des-separatistes-contre-les-multinationales-secessionnistes.jpg) [Pocket](https://getpocket.com/save?title=Crise%20anglophone%20%3A%20le%20plan%20secret%20des%20s%C3%A9paratistes%20contre%20les%20multinationales&url=https://ecomatin.net/crise-anglophone-le-plan-secret-des-separatistes-contre-les-multinationales/)


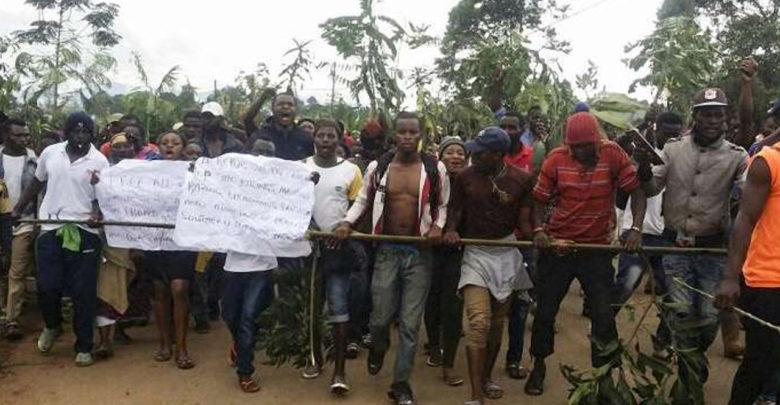


La crise dans les Régions du Sud et du Nord-ouest n’est pas que politique et sécuritaire. Elle est également économique. John Mbah Akuoh, Nelson Mangeh, Ntumfoyn Boh Herbert, Elvis Kometa, Samuel Sako, Lucas Cho Ayaba, leaders séparatistes des organisations Agc, l’Ig, le Morisc, le Roa, le Scyl, Scnc et le Consortium, envisagent faire main-basse sur les richesses des régions du Sud et du Nord-Ouest, dotées d’un important potentiel économique. Plan d’appropriation au sein d’un regroupement baptisé « Front line of the libération of Ambazonia ». Pour preuve, cette mise en garde des sécessionnistes anglophones sur les richesses minières, pétrolières, halieutiques ou touristiques de ces deux régions, à l’issue d’une réunion tenue les 17 et 18 septembre 2018 à Washington, la capitale politique des Etats-Unis.

Entre autres résolutions prises lors de cette concertation retransmise par vidéo-conférence en Chine, au Canada, en Grande Bretagne et à Chicago, figurent celle lancée à l’endroit des entreprises internationales. La 7ème, elle menace « toutes les entreprises internationales qui signeront des accords avec le Cameroun sur les ressources des amazoniens ». Ces dernières « ne pourront, ni les exploiter, et leurs contrats seront considérés comme des actes de vol ». Une mise en garde qui sonne comme un véritable hold-up  économique projeté, vues les potentialités de ces deux régions couvrant une superficie réunie de 42.710 km2. Avec un important potentiel économique. Pour de nombreux investisseurs, 16%,7%, le Sud-ouest présente un climat propice aux affaires, d’après une enquête de l’Institut national de la statistique menée en 2010 auprès de certains acteurs économiques nationaux et étrangers. Devant N’Gaoundéré, Douala et Yaoundé. Climat plutôt défavorable pour 25% de ces investisseurs. D’après la même étude intitulée « l’état de l’industrie camerounaise »,  57,1% de ces chefs d’entreprises jugent  « assez bon » le climat des affaires dans la région du Nord-ouest.

**Lire aussi :**[« Indépendance de l’Ambazonie » : un voile idéologique sur un juteux business](https://ecomatin.net/independance-de-lambazonie-un-voile-ideologique-sur-un-juteux-business/)

**Potentiel**

Cet environnement attractif a par conséquent développé un important tissu industriel  local. Avec 22 000 postes, la Cameroon Development Corporation (CDC) reste le premier employeur privé du Cameroun. Deuxième après l’Etat. Implantée dans la région du Sud-Ouest, la CDC dispose de plusieurs usines, plantations de palmier à huile, d’hévéa et de banane. Autre fleuron de l’économie camerounaise avec siège dans la Région du Sud-ouest, la Société nationale de raffinage (Sonara), spécialisée dans le traitement des produits pétroliers. Avec une capacité de production d’environ 2,2 millions de tonnes par an pour un capital de 23 milliards de FCFA, la Sonara  est plus que jamais au centre de toutes les attentions des belligérants. La Pamol, autre importante entreprise agroalimentaire située à Ekondo Titi, Région du Sud-ouest fait également partie de ces potentialités convoitées. En plus du fort potentiel de ressources énergétiques espéré de la rétrocession de la presqu’île de Bakassi au Cameroun par le Nigeria le 14 août 2008. La zone Sud-ouest est également dotée d’un important potentiel touristique, source considérable de devises et d’emplois pour les populations.

Le recensement général des entreprises (Rge), réalisé par l’Institut national de la statistique au cours de la période août-novembre 2009, a permis d’identifier 6487 entreprises et établissements en activité dans la région du Nord-Ouest. Elles sont estimées à près de 8000 en 2018. 88,3% sont des très petites entreprises (TPE), 9,4% des petites entreprises (PE), 2,0% des moyennes entreprises (Me) et 0,3% des grandes entreprises (Ge). En définitive, les régions du Nord-Ouest et du Sud-Ouest concentrent  respectivement 10,3% et 9,5% des très petites entreprises. La région du Sud-Ouest compte plus de 1500 entreprises, toutes catégories confondues. Avec 5 unités de productions industrielles, correspondant à 1,9% des grandes entreprises du pays. Alors que le Nord-Ouest est à 1,5%, selon l’Ins. Le Nord-Ouest et le Sud-Ouest occupent ainsi les 4ème et 5ème places nationales en termes de potentiel économique.

<https://ecomatin.net/crise-anglophone-le-plan-secret-des-separatistes-contre-les-multinationales/>

1. **Crise anglophone: MTN Cameroon rallonge la liste des entreprises impactées**

L’entreprise des télécommunications annonce 206 sites vandalisés depuis avril 2018.

[**EcoMatin**](https://ecomatin.net/author/admin/) [Envoyer un courriel](mailto:ecomatin@yahoo.fr)6 novembre 2018Dernière mise à jour: 16 novembre 2018

 294 2 minutes de lecture

[Facebook](https://www.facebook.com/sharer.php?u=https://ecomatin.net/crise-anglophone-mtn-cameroon-rallonge-la-liste-des-entreprises-impactees/) [Twitter](https://twitter.com/intent/tweet?text=Crise%20anglophone%3A%20MTN%20Cameroon%20rallonge%20la%20liste%20des%20entreprises%20impact%C3%A9es&url=https://ecomatin.net/crise-anglophone-mtn-cameroon-rallonge-la-liste-des-entreprises-impactees/) [Linkedin](https://www.linkedin.com/shareArticle?mini=true&url=https://ecomatin.net/crise-anglophone-mtn-cameroon-rallonge-la-liste-des-entreprises-impactees/&title=Crise%20anglophone%3A%20MTN%20Cameroon%20rallonge%20la%20liste%20des%20entreprises%20impact%C3%A9es) [Tumblr](https://www.tumblr.com/share/link?url=https://ecomatin.net/crise-anglophone-mtn-cameroon-rallonge-la-liste-des-entreprises-impactees/&name=Crise%20anglophone%3A%20MTN%20Cameroon%20rallonge%20la%20liste%20des%20entreprises%20impact%C3%A9es) [Pinterest](https://pinterest.com/pin/create/button/?url=https://ecomatin.net/crise-anglophone-mtn-cameroon-rallonge-la-liste-des-entreprises-impactees/&description=Crise%20anglophone%3A%20MTN%20Cameroon%20rallonge%20la%20liste%20des%20entreprises%20impact%C3%A9es&media=https://ecomatin.net/wp-content/uploads/2018/11/ecomatin.net-crise-anglophone-mtn-cameroon-rallonge-la-liste-des-entreprises-impactees-mtn.jpg) [Reddit](https://reddit.com/submit?url=https://ecomatin.net/crise-anglophone-mtn-cameroon-rallonge-la-liste-des-entreprises-impactees/&title=Crise%20anglophone%3A%20MTN%20Cameroon%20rallonge%20la%20liste%20des%20entreprises%20impact%C3%A9es) [VKontakte](https://vk.com/share.php?url=https://ecomatin.net/crise-anglophone-mtn-cameroon-rallonge-la-liste-des-entreprises-impactees/) [Odnoklassniki](https://connect.ok.ru/dk?st.cmd=WidgetSharePreview&st.shareUrl=https://ecomatin.net/crise-anglophone-mtn-cameroon-rallonge-la-liste-des-entreprises-impactees/&description=Crise%20anglophone%3A%20MTN%20Cameroon%20rallonge%20la%20liste%20des%20entreprises%20impact%C3%A9es&media=https://ecomatin.net/wp-content/uploads/2018/11/ecomatin.net-crise-anglophone-mtn-cameroon-rallonge-la-liste-des-entreprises-impactees-mtn.jpg) [Pocket](https://getpocket.com/save?title=Crise%20anglophone%3A%20MTN%20Cameroon%20rallonge%20la%20liste%20des%20entreprises%20impact%C3%A9es&url=https://ecomatin.net/crise-anglophone-mtn-cameroon-rallonge-la-liste-des-entreprises-impactees/)

[Les vagues de licenciements des employés en cours pour raisons](https://ecomatin.net/licenciement-en-cascade-a-mtn-cameroon/) économiques au sein de l’opérateur de télécoms**MTN Cameroo**n y trouvent certainement une des justifications. L’entreprise des Télécoms fait désormais partie de celles impactées par la crise socio-politique qui secoue actuellement les régions du Nord-Ouest et du Sud-Ouest. Le réseau de MTN Cameroon, informe-t-on, est de plus en plus perturbé dans les régions du Nord-Ouest et du Sud-Ouest du pays, en proie aux attaques des sécessionnistes qui n’hésitent pas à s’attaquer aux installations de cet opérateur de mobile.

 C’est du moins ce que révèle **Massey Njiti Bongang**, Corporate Communications Manager chez MTN Cameroon. «*Un total de****206 sites****MTN ont été vandalisés depuis avril 2018, ou alors sont en panne, à cause des difficultés à pouvoir y accéder pour des raisons d’insécurité*», a-t-il révélé. En dépit de ces difficultés, l’opérateur affirme avoir déjà rendu opérationnels **33 sites** vandalisés, et ambitionne de remettre bientôt en service les **173 sites** restants, tout en évitant de mettre en danger la vie des personnes chargées de réaliser les travaux de réhabilitation ou de dépannage. On se rappelle qu’un récent rapport du Groupement Inter patronal du Cameroun (Gicam) indiquait que deux mastodontes de l’agro-industrie camerounaise, la CDC et PAMOL étaient pratiquement à l’agonie du fait de cette situation  de crise socio-politique dans cette partie du pays. Ces agro-industries enregistraient des pertes se chiffrant à**9,2 milliards de FCFA** pour les productions de banane, d’huile de palme et de caoutchouc et un manque à gagner en chiffres d’affaires de **11,4 milliards de F CFA**.

Pour la CDC par exemple, le Gicam indiquait que sur **29 sites de production** (plantations et usines), **12 sites** étaient en arrêt total de production, certains sites étant devenus des camps de base pour des assaillants armés qui en ont délogé les travailleurs ; 10 sites n’étaient plus que partiellement opérationnels en raison des interruptions sporadiques d’activités suite à des attaques de groupes armés, des interruptions de l’alimentation en énergie électrique ou à cause de l’inaccessibilité à certaines zones ; 07 sites dont 02 usines (Tiko et Idenau) et 05 plantations (Debundscha, Missellele, Ndongo, Mondoni et Moquo) étaient encore entièrement opérationnels. En termes d’emplois, on estimait à **6 124** déjà perdus (sites en arrêt de production) et **5 805** autres relevant des sites partiellement opérationnels étaient gravement menacés. Ce qui représente **71% de l’effectif total** employé par la société.

<https://ecomatin.net/crise-anglophone-mtn-cameroon-rallonge-la-liste-des-entreprises-impactees/>

1. **Résolution de la crise anglophone: le gouvernement revendique plus de 60 milliards de dépenses budgétaires**

En réponse aux « accusations » du parlement européen contre le Cameroun, le ministre de la Communication, René Emmanuel Sadi, a dressé lors d’un point de presse un bilan économique des actions gouvernementales depuis le début de la crise dans le processus de règlement du conflit anglophone.

[**EcoMatin**](https://ecomatin.net/author/admin8664/) [Suivre sur Twitter](https://twitter.com/ECOMatin1)[Envoyer un courriel](mailto:articles.ecomatin@gmail.com)2 mai 2019Dernière mise à jour: 16 novembre 2021

 196 2 minutes de lecture

[Facebook](https://www.facebook.com/sharer.php?u=https://ecomatin.net/resolution-de-la-crise-anglophone-le-gouvernement-revendique-plus-de-60-milliards-de-depenses-budgetaires/) [Twitter](https://twitter.com/intent/tweet?text=R%C3%A9solution%20de%20la%20crise%20anglophone%3A%20le%20gouvernement%20revendique%20plus%20de%2060%20milliards%20de%20d%C3%A9penses%20budg%C3%A9taires&url=https://ecomatin.net/resolution-de-la-crise-anglophone-le-gouvernement-revendique-plus-de-60-milliards-de-depenses-budgetaires/) [Linkedin](https://www.linkedin.com/shareArticle?mini=true&url=https://ecomatin.net/resolution-de-la-crise-anglophone-le-gouvernement-revendique-plus-de-60-milliards-de-depenses-budgetaires/&title=R%C3%A9solution%20de%20la%20crise%20anglophone%3A%20le%20gouvernement%20revendique%20plus%20de%2060%20milliards%20de%20d%C3%A9penses%20budg%C3%A9taires) [Tumblr](https://www.tumblr.com/share/link?url=https://ecomatin.net/resolution-de-la-crise-anglophone-le-gouvernement-revendique-plus-de-60-milliards-de-depenses-budgetaires/&name=R%C3%A9solution%20de%20la%20crise%20anglophone%3A%20le%20gouvernement%20revendique%20plus%20de%2060%20milliards%20de%20d%C3%A9penses%20budg%C3%A9taires) [Pinterest](https://pinterest.com/pin/create/button/?url=https://ecomatin.net/resolution-de-la-crise-anglophone-le-gouvernement-revendique-plus-de-60-milliards-de-depenses-budgetaires/&description=R%C3%A9solution%20de%20la%20crise%20anglophone%3A%20le%20gouvernement%20revendique%20plus%20de%2060%20milliards%20de%20d%C3%A9penses%20budg%C3%A9taires&media=https://ecomatin.net/wp-content/uploads/2019/05/ecomatin.net-resolution-de-la-crise-anglophone-le-gouvernement-revendique-plus-de-60-milliards-de-depenses-budgetaires-crise-anglophone-2019.jpg) [Reddit](https://reddit.com/submit?url=https://ecomatin.net/resolution-de-la-crise-anglophone-le-gouvernement-revendique-plus-de-60-milliards-de-depenses-budgetaires/&title=R%C3%A9solution%20de%20la%20crise%20anglophone%3A%20le%20gouvernement%20revendique%20plus%20de%2060%20milliards%20de%20d%C3%A9penses%20budg%C3%A9taires) [VKontakte](https://vk.com/share.php?url=https://ecomatin.net/resolution-de-la-crise-anglophone-le-gouvernement-revendique-plus-de-60-milliards-de-depenses-budgetaires/) [Odnoklassniki](https://connect.ok.ru/dk?st.cmd=WidgetSharePreview&st.shareUrl=https://ecomatin.net/resolution-de-la-crise-anglophone-le-gouvernement-revendique-plus-de-60-milliards-de-depenses-budgetaires/&description=R%C3%A9solution%20de%20la%20crise%20anglophone%3A%20le%20gouvernement%20revendique%20plus%20de%2060%20milliards%20de%20d%C3%A9penses%20budg%C3%A9taires&media=https://ecomatin.net/wp-content/uploads/2019/05/ecomatin.net-resolution-de-la-crise-anglophone-le-gouvernement-revendique-plus-de-60-milliards-de-depenses-budgetaires-crise-anglophone-2019.jpg) [Pocket](https://getpocket.com/save?title=R%C3%A9solution%20de%20la%20crise%20anglophone%3A%20le%20gouvernement%20revendique%20plus%20de%2060%20milliards%20de%20d%C3%A9penses%20budg%C3%A9taires&url=https://ecomatin.net/resolution-de-la-crise-anglophone-le-gouvernement-revendique-plus-de-60-milliards-de-depenses-budgetaires/)


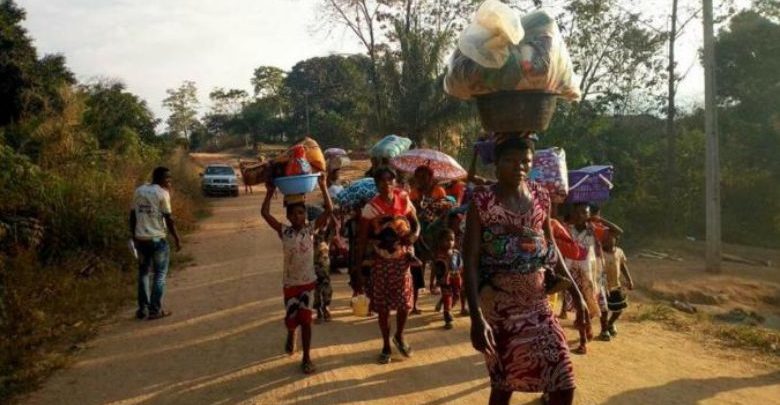


Née à la fin de l’année 2016 de simples revendications corporatistes portées par les avocats et les enseignants, la crise dans les parties anglophones du pays s’est ensuite transformée en **revendications séparatistes violentes**. Causant des bilans alarmants sur le plan socio-économique, qui depuis quelques temps entraînent des accusations portées à l’endroit des forces nationales de défenses et de sécurité camerounaises. Les plus récentes sont les accusations « *d’exactions et autres graves atteintes aux droits de l’Homme dirigées sur les civiles*»  décriées par le parlement européen le 18 avril 2019.

*Dévoilé depuis le 21 juin 2018, ce Plan d’assistance humanitaire d’urgence pour les régions du Nord-Ouest et du Sud-Ouest, a déjà approvisionné****60 345 victimes et déplacés***

C’est en réponse à cette Résolution du Parlement européen sur le Cameroun qui « *dépeint littéralement la situation socio-politique au Cameroun, faisant abstraction de toutes les mesures idoines prises par les autorités de l’Etat*», que l’Etat du Cameroun a tenu à rappeler un certain nombre de mesures et stratégies mises en œuvre dans le but de protéger les personnes, d’assurer un retour au calme ainsi que la reprise des activités économiques. Entre autres, l’allocation d’un budget estimé à **12,7 milliards FCFA** pour assister **74 994 personnes** dans le **Nord-Ouest et le Sud-Ouest,** sur la période 2018-2019.

Dévoilé depuis le 21 juin 2018, ce Plan d’assistance humanitaire d’urgence pour les régions du Nord-Ouest et du Sud-Ouest, a déjà approvisionné **60 345 victimes et déplacés** internes en denrées alimentaires dans **12 arrondissements** réparties dans les deux régions, à en croire le ministre de la Communication, **René Emmanuel Sadi,** et le ministre de l’Administration territoriale, **Paul Atanga Nji,** coordonnateur dudit plan.

Toujours dans la perspective d’un retour à la paix, le gouvernement a signé en date du 22 février 2019, un décret fixant à près de **50 milliards de FCFA** la dotation générale de la décentralisation, soit **10 milliards de FCFA** pour les régions du Nord-Ouest et du Sud-Ouest, a indiqué le porte-parole du gouvernement. Ceci pour continuer le processus d’élargissement des compétentes, afin que ces deux régions particulièrement prennent en main « mieux que par le passé, la gestion des affaires locales ».

Par ailleurs le chef de l’Etat a mis sur pied un comité de désarmement, de mobilisation et de réintégration, à l’intention des bandes armées du Nord-Ouest et du Sud-Ouest. Autant d’initiatives qui démontrent « toute l’étendue de l’engagement du chef de l’Etat à restaurer la paix dans les régions en proie à l’insécurité, non pas seulement par le recours légitime à la force, mais par les voies du dialogue, de la sensibilisation, de la main tendue à celles et ceux des compatriotes dévoyés qui souhaitent retrouver le droit chemin et apporter leur pierre à l’édifice ». En termes de chiffres, l’on estime ces dépenses budgétaires à plus de **60 milliards**. Rappelons que plusieurs autres mesures ont été mises en œuvre ou sont en cours sur le plan socio-politique.

<https://ecomatin.net/resolution-de-la-crise-anglophone-le-gouvernement-revendique-plus-de-60-milliards-de-depenses-budgetaires/>

1. **Le Groupe SABC paie un lourd tribut de la crise anglophone**

Son chiffre d’affaires est passé de 334,9 milliards de Fcfa en 2017 à 314,4 milliards de Fcfa en 2018, soit une baisse d’environ 20 milliards de Fcfa. C’est dans ce contexte difficile que l’assemblée générale des actionnaires de ce groupe va adopter les comptes de cet exercice, le 15 mai prochain à Douala.

[**EcoMatin**](https://ecomatin.net/author/admin/) [Envoyer un courriel](mailto:ecomatin@yahoo.fr)13 mai 2019Dernière mise à jour: 17 novembre 2021

[Facebook](https://www.facebook.com/sharer.php?u=https://ecomatin.net/le-groupe-sabc-paie-un-lourd-tribut-de-la-crise-anglophone/) [Twitter](https://twitter.com/intent/tweet?text=Le%20Groupe%20SABC%20paie%20un%20lourd%20tribut%20de%20la%20crise%20anglophone&url=https://ecomatin.net/le-groupe-sabc-paie-un-lourd-tribut-de-la-crise-anglophone/) [Linkedin](https://www.linkedin.com/shareArticle?mini=true&url=https://ecomatin.net/le-groupe-sabc-paie-un-lourd-tribut-de-la-crise-anglophone/&title=Le%20Groupe%20SABC%20paie%20un%20lourd%20tribut%20de%20la%20crise%20anglophone) [Tumblr](https://www.tumblr.com/share/link?url=https://ecomatin.net/le-groupe-sabc-paie-un-lourd-tribut-de-la-crise-anglophone/&name=Le%20Groupe%20SABC%20paie%20un%20lourd%20tribut%20de%20la%20crise%20anglophone) [Pinterest](https://pinterest.com/pin/create/button/?url=https://ecomatin.net/le-groupe-sabc-paie-un-lourd-tribut-de-la-crise-anglophone/&description=Le%20Groupe%20SABC%20paie%20un%20lourd%20tribut%20de%20la%20crise%20anglophone&media=https://ecomatin.net/wp-content/uploads/2019/05/ecomatin.net-le-groupe-sabc-paie-un-lourd-tribut-de-la-crise-anglophone-crise-anglophone-sabc.jpg) [Reddit](https://reddit.com/submit?url=https://ecomatin.net/le-groupe-sabc-paie-un-lourd-tribut-de-la-crise-anglophone/&title=Le%20Groupe%20SABC%20paie%20un%20lourd%20tribut%20de%20la%20crise%20anglophone) [VKontakte](https://vk.com/share.php?url=https://ecomatin.net/le-groupe-sabc-paie-un-lourd-tribut-de-la-crise-anglophone/) [Odnoklassniki](https://connect.ok.ru/dk?st.cmd=WidgetSharePreview&st.shareUrl=https://ecomatin.net/le-groupe-sabc-paie-un-lourd-tribut-de-la-crise-anglophone/&description=Le%20Groupe%20SABC%20paie%20un%20lourd%20tribut%20de%20la%20crise%20anglophone&media=https://ecomatin.net/wp-content/uploads/2019/05/ecomatin.net-le-groupe-sabc-paie-un-lourd-tribut-de-la-crise-anglophone-crise-anglophone-sabc.jpg) [Pocket](https://getpocket.com/save?title=Le%20Groupe%20SABC%20paie%20un%20lourd%20tribut%20de%20la%20crise%20anglophone&url=https://ecomatin.net/le-groupe-sabc-paie-un-lourd-tribut-de-la-crise-anglophone/)

Les actionnaires du Groupe Société Anonyme des Brasseries du Cameroun (**SABC**), de la Société des Eaux minérales du Cameroun (**Semc**) et de la Société Camerounaise de Verrerie (**Socaver**) ont rendez-vous le 15 mai prochain, au Castel Hall, sis à Douala. Ce sera, selon une annonce légale parue dans une édition du quotidien à capitaux publics, **Cameroon tribune**, à l’occasion de l’assemblée générale ordinaire. Une instance qui devra délibérer notamment sur le rapport de gestion du conseil d’administration, le rapport général des commissaires aux comptes. Tout comme il sera  aussi question de procéder à l’approbation de l’ajustement du report à nouveau des exercices antérieurs au 1er janvier 2018 ; l’approbation des états financiers de synthèse de l’exercice social clos le 31 décembre 2018 ; l’approbation des états financiers de synthèse consolidé de l’exercice social clos le 31 décembre 2018 ; l’affection du résultat ; la fixation du dividende et de sa mise en paiement, etc. Il faut relever que cette assemblée générale des actionnaires  va se tenir dans un contexte difficile, avec les résultats du groupe en deçà des attentes.

En effet, au cours de l’exercice 2018, le Groupe SABC a enregistré en 2018 un chiffre d’affaires TTC de **560,4 milliards de FCFA**. Après déduction des ristournes, pour un montant de **28,7 milliards de FCFA**, et des taxes, pour **217,3 milliards de FCFA**, le chiffre d’affaires HT de l’année 2018 s’est établi à **314,4 milliards de F CFA** contre **334,9 milliards** en 2017, soit une baisse d’environ **20 milliards de FCFA**. Le leader de l’industrie brassicole du pays traverse donc une mauvaise passe. Pourtant, en 2018, précise-t-on, la SABC a enregistré **2 %** d’augmentation de ses volumes de vente. Une progression remarquable mais qui reste en retrait par rapport aux perspectives du marché, nettement plus ambitieuses. L’entreprise est en fait entravée par la dégradation du contexte économique depuis 2017 et par l’accroissement du risque sécuritaire.

Comme la plupart des grandes entreprises, la filiale du groupe français **Castel**subit de plein fouet la crise dans la zone anglophone (qui représente **20 %** de son chiffre d’affaires). Des bandes séparatistes affrontent l’armée dans les régions du Nord-Ouest et du Sud-Ouest. « *Le bilan est très lourd, déplore****Emmanuel de Tailly,****le directeur général de la SABC. Entre janvier 2017 et janvier 2019, nos points de vente et distributeurs ont enregistré 15 attaques à mains armées, tandis qu’une dizaine de véhicules [camions ou pick-up] étaient incendiés. Le coût de ces destructions s’élève, avec celui des produits et emballages emportés ou détruits, à plus de****500 millions de FCFA*** », précisait-il dans les colonnes de l’hebdomadaire panafricain **Jeune Afrique**.

Dans ces deux régions du pays, les insurgés imposent des journées *« villes mortes* », et dès juin 2018, la SABC a décidé de fermer des centres de distribution à **Muyuka, Mamfé** et **Kumba**, dans le Sud-Ouest, et à **Wum, Fundong, Kumbo** et **Nkambe**, dans le Nord-Ouest, face aux risques de kidnapping et aux menaces journalières proférées à l’encontre de ses agents. « *Nous n’avions pas le choix, il fallait garantir la sécurité de nos salariés et de leurs familles, explique de Tailly. Les périodes de fermeture s’élèvent à****350 jours****, soit un manque à gagner de plus de****400 millions de FCFA****. Tout cela nous a fait perdre dix points de croissance.* »

<https://ecomatin.net/le-groupe-sabc-paie-un-lourd-tribut-de-la-crise-anglophone/>

1. **Filière banane : La CDC paie un lourd tribut de la crise dans le Sud-Ouest**

En août 2018, l’agro-industriel camerounais a réalisé son plus faible volume d’exportations de bananes depuis 13 ans.

[**EcoMatin**](https://ecomatin.net/author/admin8664/) [Suivre sur Twitter](https://twitter.com/ECOMatin1)[Envoyer un courriel](mailto:articles.ecomatin@gmail.com)25 septembre 2018Dernière mise à jour: 11 décembre 2018

[Facebook](https://www.facebook.com/sharer.php?u=https://ecomatin.net/filiere-banane-la-cdc-paie-un-lourd-tribut-de-la-crise-dans-le-sud-ouest/) [Twitter](https://twitter.com/intent/tweet?text=Fili%C3%A8re%20banane%C2%A0%3A%20La%20CDC%20paie%20un%20lourd%20tribut%20de%20la%20crise%20dans%20le%20Sud-Ouest&url=https://ecomatin.net/filiere-banane-la-cdc-paie-un-lourd-tribut-de-la-crise-dans-le-sud-ouest/) [Linkedin](https://www.linkedin.com/shareArticle?mini=true&url=https://ecomatin.net/filiere-banane-la-cdc-paie-un-lourd-tribut-de-la-crise-dans-le-sud-ouest/&title=Fili%C3%A8re%20banane%C2%A0%3A%20La%20CDC%20paie%20un%20lourd%20tribut%20de%20la%20crise%20dans%20le%20Sud-Ouest) [Tumblr](https://www.tumblr.com/share/link?url=https://ecomatin.net/filiere-banane-la-cdc-paie-un-lourd-tribut-de-la-crise-dans-le-sud-ouest/&name=Fili%C3%A8re%20banane%C2%A0%3A%20La%20CDC%20paie%20un%20lourd%20tribut%20de%20la%20crise%20dans%20le%20Sud-Ouest) [Pinterest](https://pinterest.com/pin/create/button/?url=https://ecomatin.net/filiere-banane-la-cdc-paie-un-lourd-tribut-de-la-crise-dans-le-sud-ouest/&description=Fili%C3%A8re%20banane%C2%A0%3A%20La%20CDC%20paie%20un%20lourd%20tribut%20de%20la%20crise%20dans%20le%20Sud-Ouest&media=https://ecomatin.net/wp-content/uploads/2018/09/ecomatin.net-filiere-banane-la-cdc-paie-un-lourd-tribut-de-la-crise-dans-le-sud-ouest-bananeraie-cmr.jpg) [Reddit](https://reddit.com/submit?url=https://ecomatin.net/filiere-banane-la-cdc-paie-un-lourd-tribut-de-la-crise-dans-le-sud-ouest/&title=Fili%C3%A8re%20banane%C2%A0%3A%20La%20CDC%20paie%20un%20lourd%20tribut%20de%20la%20crise%20dans%20le%20Sud-Ouest) [VKontakte](https://vk.com/share.php?url=https://ecomatin.net/filiere-banane-la-cdc-paie-un-lourd-tribut-de-la-crise-dans-le-sud-ouest/) [Odnoklassniki](https://connect.ok.ru/dk?st.cmd=WidgetSharePreview&st.shareUrl=https://ecomatin.net/filiere-banane-la-cdc-paie-un-lourd-tribut-de-la-crise-dans-le-sud-ouest/&description=Fili%C3%A8re%20banane%C2%A0%3A%20La%20CDC%20paie%20un%20lourd%20tribut%20de%20la%20crise%20dans%20le%20Sud-Ouest&media=https://ecomatin.net/wp-content/uploads/2018/09/ecomatin.net-filiere-banane-la-cdc-paie-un-lourd-tribut-de-la-crise-dans-le-sud-ouest-bananeraie-cmr.jpg) [Pocket](https://getpocket.com/save?title=Fili%C3%A8re%20banane%C2%A0%3A%20La%20CDC%20paie%20un%20lourd%20tribut%20de%20la%20crise%20dans%20le%20Sud-Ouest&url=https://ecomatin.net/filiere-banane-la-cdc-paie-un-lourd-tribut-de-la-crise-dans-le-sud-ouest/)

La menace est réelle et les conséquences véritablement néfastes. La Cameroon Development Corporation (CDC), entreprise agro-industrielle publique qui exploite de vastes plantations d’hévéa et de bananes dans la région du Sud-Ouest du pays paie un lourd tribut de son implantation dans cette partie du pays, en proie à une crise socio-politique. La filière  banane en est une qui subit de plein fouet cette crise. Selon les statistiques compilées par l’Association bananière du Cameroun (Assobacam), la CDC, le 2ème employeur du pays après la Fonction publique, a enregistré sa plus mauvaise performance depuis l’année 2005 en termes d’exportations au mois d’août 2018, soit 13 ans. Cette entreprise n’a exporté que 1 488 tonnes. Ce qui fait pratiquement six fois moins de bananes exportées qu’en août 2017 (8 560 tonnes), et fait à peine mieux que la société Boh Plantations (Bpl). Selon l’Assobacam, ce petit poucet du secteur local de la banane a exporté 1 164 tonnes de bananes au cours du mois d’août 2018, contre 12 261 tonnes pour la société des plantations du Haut Penja (PHP), le leader du marché

Selon diverses sources, la dégringolade de la CDC sur le marché de la banane est la conséquence des revendications violentes des séparatistes anglophones, en cours depuis plus d’un an dans la région du Sud-Ouest du Cameroun, où la CDC possède toutes ses plantations. L’insécurité installée par cette situation est telle que cette société d’Etat a dû fermer la plupart de ses plantations à l’exploitation, laissant ainsi oisive, une bonne partie de ses 22 000 employés. Par contre, entre juillet et août 2018, la filiale  locale de la Compagnie fruitière de Marseille, la société des Plantations du Haut-Penja (PHP), a assuré près de 75% des exportations de bananes au Cameroun, avec un volume de 28 434 tonnes de bananes expédiées entre juillet et août 2018.

Selon les statistiques de l’Assobacam, la PHP a été particulièrement dynamique au mois d’août 2018, en exportant 12 261 tonnes de bananes, contre seulement 8 672 tonnes au mois de juillet, soit une augmentation de près de 4 000 tonnes sur une période d’un mois. Pendant qu’entre les mois de juillet et août 2018, la CDC, numéro 2 du marché de la banane, n’a exporté que 5 534 tonnes, dont 4 046 tonnes au mois de juillet.

<https://ecomatin.net/filiere-banane-la-cdc-paie-un-lourd-tribut-de-la-crise-dans-le-sud-ouest/>

1. **Crise anglophone: MTN Cameroon rallonge la liste des entreprises impactées**

L’entreprise des télécommunications annonce 206 sites vandalisés depuis avril 2018.

[**EcoMatin**](https://ecomatin.net/author/admin/) [Envoyer un courriel](mailto:ecomatin@yahoo.fr)6 novembre 2018Dernière mise à jour: 16 novembre 2018

[Facebook](https://www.facebook.com/sharer.php?u=https://ecomatin.net/crise-anglophone-mtn-cameroon-rallonge-la-liste-des-entreprises-impactees/) [Twitter](https://twitter.com/intent/tweet?text=Crise%20anglophone%3A%20MTN%20Cameroon%20rallonge%20la%20liste%20des%20entreprises%20impact%C3%A9es&url=https://ecomatin.net/crise-anglophone-mtn-cameroon-rallonge-la-liste-des-entreprises-impactees/) [Linkedin](https://www.linkedin.com/shareArticle?mini=true&url=https://ecomatin.net/crise-anglophone-mtn-cameroon-rallonge-la-liste-des-entreprises-impactees/&title=Crise%20anglophone%3A%20MTN%20Cameroon%20rallonge%20la%20liste%20des%20entreprises%20impact%C3%A9es) [Tumblr](https://www.tumblr.com/share/link?url=https://ecomatin.net/crise-anglophone-mtn-cameroon-rallonge-la-liste-des-entreprises-impactees/&name=Crise%20anglophone%3A%20MTN%20Cameroon%20rallonge%20la%20liste%20des%20entreprises%20impact%C3%A9es) [Pinterest](https://pinterest.com/pin/create/button/?url=https://ecomatin.net/crise-anglophone-mtn-cameroon-rallonge-la-liste-des-entreprises-impactees/&description=Crise%20anglophone%3A%20MTN%20Cameroon%20rallonge%20la%20liste%20des%20entreprises%20impact%C3%A9es&media=https://ecomatin.net/wp-content/uploads/2018/11/ecomatin.net-crise-anglophone-mtn-cameroon-rallonge-la-liste-des-entreprises-impactees-mtn.jpg) [Reddit](https://reddit.com/submit?url=https://ecomatin.net/crise-anglophone-mtn-cameroon-rallonge-la-liste-des-entreprises-impactees/&title=Crise%20anglophone%3A%20MTN%20Cameroon%20rallonge%20la%20liste%20des%20entreprises%20impact%C3%A9es) [VKontakte](https://vk.com/share.php?url=https://ecomatin.net/crise-anglophone-mtn-cameroon-rallonge-la-liste-des-entreprises-impactees/) [Odnoklassniki](https://connect.ok.ru/dk?st.cmd=WidgetSharePreview&st.shareUrl=https://ecomatin.net/crise-anglophone-mtn-cameroon-rallonge-la-liste-des-entreprises-impactees/&description=Crise%20anglophone%3A%20MTN%20Cameroon%20rallonge%20la%20liste%20des%20entreprises%20impact%C3%A9es&media=https://ecomatin.net/wp-content/uploads/2018/11/ecomatin.net-crise-anglophone-mtn-cameroon-rallonge-la-liste-des-entreprises-impactees-mtn.jpg) [Pocket](https://getpocket.com/save?title=Crise%20anglophone%3A%20MTN%20Cameroon%20rallonge%20la%20liste%20des%20entreprises%20impact%C3%A9es&url=https://ecomatin.net/crise-anglophone-mtn-cameroon-rallonge-la-liste-des-entreprises-impactees/)

[Les vagues de licenciements des employés en cours pour raisons](https://ecomatin.net/licenciement-en-cascade-a-mtn-cameroon/) économiques au sein de l’opérateur de télécoms**MTN Cameroo**n y trouvent certainement une des justifications. L’entreprise des Télécoms fait désormais partie de celles impactées par la crise socio-politique qui secoue actuellement les régions du Nord-Ouest et du Sud-Ouest. Le réseau de MTN Cameroon, informe-t-on, est de plus en plus perturbé dans les régions du Nord-Ouest et du Sud-Ouest du pays, en proie aux attaques des sécessionnistes qui n’hésitent pas à s’attaquer aux installations de cet opérateur de mobile.

 C’est du moins ce que révèle **Massey Njiti Bongang**, Corporate Communications Manager chez MTN Cameroon. «*Un total de****206 sites****MTN ont été vandalisés depuis avril 2018, ou alors sont en panne, à cause des difficultés à pouvoir y accéder pour des raisons d’insécurité*», a-t-il révélé. En dépit de ces difficultés, l’opérateur affirme avoir déjà rendu opérationnels **33 sites** vandalisés, et ambitionne de remettre bientôt en service les **173 sites** restants, tout en évitant de mettre en danger la vie des personnes chargées de réaliser les travaux de réhabilitation ou de dépannage. On se rappelle qu’un récent rapport du Groupement Inter patronal du Cameroun (Gicam) indiquait que deux mastodontes de l’agro-industrie camerounaise, la CDC et PAMOL étaient pratiquement à l’agonie du fait de cette situation  de crise socio-politique dans cette partie du pays. Ces agro-industries enregistraient des pertes se chiffrant à**9,2 milliards de FCFA** pour les productions de banane, d’huile de palme et de caoutchouc et un manque à gagner en chiffres d’affaires de **11,4 milliards de F CFA**.

Pour la CDC par exemple, le Gicam indiquait que sur **29 sites de production** (plantations et usines), **12 sites** étaient en arrêt total de production, certains sites étant devenus des camps de base pour des assaillants armés qui en ont délogé les travailleurs ; 10 sites n’étaient plus que partiellement opérationnels en raison des interruptions sporadiques d’activités suite à des attaques de groupes armés, des interruptions de l’alimentation en énergie électrique ou à cause de l’inaccessibilité à certaines zones ; 07 sites dont 02 usines (Tiko et Idenau) et 05 plantations (Debundscha, Missellele, Ndongo, Mondoni et Moquo) étaient encore entièrement opérationnels. En termes d’emplois, on estimait à **6 124** déjà perdus (sites en arrêt de production) et **5 805** autres relevant des sites partiellement opérationnels étaient gravement menacés. Ce qui représente **71% de l’effectif total** employé par la société.

<https://ecomatin.net/crise-anglophone-mtn-cameroon-rallonge-la-liste-des-entreprises-impactees/>

1. **Crise anglophone : 12 000 employés de la CDC en chômage**

Ils ont été mis en chômage technique du fait de la situation socio-politique qui anime les régions anglophones du Nord-ouest et du Sud-ouest.

[**EcoMatin**](https://ecomatin.net/author/admin8664/) [Suivre sur Twitter](https://twitter.com/ECOMatin1)[Envoyer un courriel](mailto:articles.ecomatin@gmail.com)28 mai 2019Dernière mise à jour: 18 novembre 2021

[Facebook](https://www.facebook.com/sharer.php?u=https://ecomatin.net/crise-anglophone-12-000-employes-de-la-cdc-en-chomage/) [Twitter](https://twitter.com/intent/tweet?text=Crise%20anglophone%20%3A%2012%20000%20employ%C3%A9s%20de%20la%20CDC%20en%20ch%C3%B4mage&url=https://ecomatin.net/crise-anglophone-12-000-employes-de-la-cdc-en-chomage/) [Linkedin](https://www.linkedin.com/shareArticle?mini=true&url=https://ecomatin.net/crise-anglophone-12-000-employes-de-la-cdc-en-chomage/&title=Crise%20anglophone%20%3A%2012%20000%20employ%C3%A9s%20de%20la%20CDC%20en%20ch%C3%B4mage) [Tumblr](https://www.tumblr.com/share/link?url=https://ecomatin.net/crise-anglophone-12-000-employes-de-la-cdc-en-chomage/&name=Crise%20anglophone%20%3A%2012%20000%20employ%C3%A9s%20de%20la%20CDC%20en%20ch%C3%B4mage) [Pinterest](https://pinterest.com/pin/create/button/?url=https://ecomatin.net/crise-anglophone-12-000-employes-de-la-cdc-en-chomage/&description=Crise%20anglophone%20%3A%2012%20000%20employ%C3%A9s%20de%20la%20CDC%20en%20ch%C3%B4mage&media=https://ecomatin.net/wp-content/uploads/2019/05/ecomatin.net-crise-anglophone-12-000-employes-de-la-cdc-en-chomage-cdc-2019.jpg) [Reddit](https://reddit.com/submit?url=https://ecomatin.net/crise-anglophone-12-000-employes-de-la-cdc-en-chomage/&title=Crise%20anglophone%20%3A%2012%20000%20employ%C3%A9s%20de%20la%20CDC%20en%20ch%C3%B4mage) [VKontakte](https://vk.com/share.php?url=https://ecomatin.net/crise-anglophone-12-000-employes-de-la-cdc-en-chomage/) [Odnoklassniki](https://connect.ok.ru/dk?st.cmd=WidgetSharePreview&st.shareUrl=https://ecomatin.net/crise-anglophone-12-000-employes-de-la-cdc-en-chomage/&description=Crise%20anglophone%20%3A%2012%20000%20employ%C3%A9s%20de%20la%20CDC%20en%20ch%C3%B4mage&media=https://ecomatin.net/wp-content/uploads/2019/05/ecomatin.net-crise-anglophone-12-000-employes-de-la-cdc-en-chomage-cdc-2019.jpg) [Pocket](https://getpocket.com/save?title=Crise%20anglophone%20%3A%2012%20000%20employ%C3%A9s%20de%20la%20CDC%20en%20ch%C3%B4mage&url=https://ecomatin.net/crise-anglophone-12-000-employes-de-la-cdc-en-chomage/)

Dans une note au gouvernement, le directeur général de la CDC, **Franklin Ngoni Ikome Njie** a déclaré que *« l’entreprise évolue en moins de 10% de ses capacités ».*Au regard de l’insécurité qui prévaut dans la région *« 12 000 employés ont été mis en chômage »,*ce qui représente **60%** des effectifs. La **CDC** paye les frais de la crise qui secoue la partie anglophone du pays, ses plantations et usines étant installées dans la région du Sud-ouest.

En début d’année, l’entreprise avait sollicité un appui de **29** **milliards** de FCFA pour relancer ses activités, dont *« sept milliards de FCFA sont nécessaires dans le secteur de l’hévéa,****14 milliards de FCFA****pour les bananeraies,****7 milliards FCFA****pour les palmeraies, le reste devrait servir à financer les arriérés de salaires »,* indiquait le directeur général dans une note au conseil d’administration. En fin 2018, le gouvernement camerounais avait lancé un processus de restructuration avec l’accompagnement d’une firme canadienne, égyptienne et française pour un montant de **80 milliards de FCFA.**

La Cameroon development cooperation (**CDC**) est l’une des toutes premières entreprises camerounaises. C’est le premier employeur (**22** **000**) du pays et l’un des principaux exportateurs des produits Made in Cameroun. La CDC produit de la banane, de l’huile de palme, du caoutchouc naturel et quelques cultures plus marginales. Toutes ces plantations sont situées dans le sud-ouest du Cameroun. Selon un rapport du Gicam, à cause de l’insécurité, les pertes enregistrées par les produits de cette société se chiffre à un manque à gagner en chiffres d’affaires estimés à **11,4 milliards FCFA** ; ainsi que d’autres pertes  (équipements volés/ détruits, rançons, vols,) évalués à **1,031 milliard de F CFA** ; soit au moins **12 milliards FCFA** globalement. Les tensions ont touché également les **29 sites** de production (plantations et usines) de  la CDC.  Toujours selon le Gicam, 12 sites sont en arrêt total de production. 10 sites ne  sont plus  que  partiellement opérationnels en raison des interruptions sporadiques d’activités suite à des attaques de groupes armés, des interruptions de l’alimentation en énergie électrique ou à cause de l’inaccessibilité à certaines zones.  07   sites   dont   02   usines   (**Tiko**   et   **Idenau**)   et   05   plantations   ) sont encore entièrement opérationnels.

<https://ecomatin.net/crise-anglophone-12-000-employes-de-la-cdc-en-chomage/>

1. **Crise anglophone: près de 600 000 enfants privés d’éducation dans le Nord-Ouest et le Sud-Ouest**

C’est le bilan que fait le Fonds des nations unies pour l’enfance (UNICEF) dans un rapport qu’il vient de publier sur la situation sécuritaire au Cameroun.

[**EcoMatin**](https://ecomatin.net/author/admin8664/) [Suivre sur Twitter](https://twitter.com/ECOMatin1)[Envoyer un courriel](mailto:articles.ecomatin@gmail.com)26 juin 2019Dernière mise à jour: 18 novembre 2021

Dans un rapport récemment publié, l’**Unicef** dresse un bilan négatif de la crise anglophone sur le plan socio-économique. L’on apprend que depuis le début de la crise anglophone (depuis 3 ans déjà), des centaines de milliers d’enfants qui n’ont pas franchi le seuil des établissements scolaires : «*Plus de 80% des écoles ont été fermées, touchant plus de 600 000 enfants* », souligne le rapport.

Pour la même cause, le rapport indique que plus de 70 écoles ont été détruites ; et les enseignants et élèves de ces structures, victimes de violences physiques : « *depuis 2018, plus de 300 élèves et enseignants ont été enlevés et relâchés après des expériences traumatisantes* », a regretté **Toby Fricker**, le porte-parole de l’Unicef cité par le rapport, qui plaide par ailleurs pour une solution rapide et un encadrement sûr des enfants. Car « *lorsque les enfants ne vont pas à l’école, ils courent un plus grand risque d’être recrutés par des groupes armés et sont plus susceptibles d’être exposés au mariage d’enfants, aux grossesses précoces, au traumatisme et à la détresse émotionnelle de longue durée que ces expériences entraînent* ».

Rappelons que ce n’est pas la première sortie de l’Unicef sur la question. Depuis 2018, les nations unies et bien d’autres institutions internationales attirent l’attention des pouvoirs publics face à la situation humanitaire qui se détériore de jours en jours. Pour mémoire, à ce jour, l’on compte plus d’un million de personnes dans le besoin et près de 500 000 déplacés interne selon les estimations de l’ONG Internationale **Crisis Group**. Pour cette année, l’Unicef déclare avoir besoin de **20 millions de dollars**, soit environ **11,5 milliards de Fcfa**, pour répondre efficacement à l’urgence humanitaire dans les régions du Nord-Ouest et du Sud-Ouest.

<https://ecomatin.net/crise-anglophone-pres-de-600-000-enfants-prives-deducation-dans-le-nord-ouest-et-le-sud-ouest/>

1. **Crise anglophone : plus de 3 milliards FCFA débloqués pour assurer la rentrée scolaire dans le NO/SO**

Laurent Serge Etoundi Ngoa, ministre de l’Education de base a détaillé la répartition de ces fonds au cours d’une conférence presse donnée le 26 août 2019 à Yaoundé.

[**EcoMatin**](https://ecomatin.net/author/admin8664/) [Suivre sur Twitter](https://twitter.com/ECOMatin1)[Envoyer un courriel](mailto:articles.ecomatin@gmail.com)2 septembre 2019Dernière mise à jour: 22 novembre 2021

La rentrée scolaire 2019-2020 en zone anglophone retient l’attention de l’Etat. Notamment le cas des infrastructures éducatives vandalisées. Mais le gouvernement veut redonner un nouveau visage aux établissements scolaires publics et privés affectés par les violences. Au cours d’une conférence de presse tenue le 26 août 2019 à Yaoundé, le**ministre de l’Education de base** (Minedub), **Laurent Serge Etoundi** **Ngoa** a rapporté les mesures qui ont été prises par l’Etat pour assurer cette rentrée scolaire amorcée lundi 2 septembre 2019. Selon le membre du gouvernement, **982 millions FCFA** ont été débloqués pour la reconstruction des salles de classes au Nord-Ouest et **712 millions FCFA** dans le Sud-Ouest. Les établissements du privé reçoivent, quant à eux, une aide de **855 millions FCFA**.  Toujours selon le Minedub, une somme de **354 millions FCFA** a été allouée en vue de subventionner des écoles dans le NO et **253 millions FCFA**dans le SO.  Après calcul, ces ressources financières vont valoir environ **3,157 milliards** de FCFA à l’Etat.

D’après   le **Fonds des Nations Unies pour l’enfance**(Unicef), de nombreux enfants au Cameroun n’ont pas mis les pieds dans une salle de classe depuis trois ans. En raison de l’interdiction de l’éducation par des groupes armés non étatiques et des attaques, plus de **80 %** des écoles ont été fermées, touchant plus de **600 000 enfants**. L’Unicef plaide pour que les écoles et les salles de classe puissent offrir aux enfants des espaces sûrs pour apprendre, pour être avec leurs amis et pour retrouver un sentiment de normalité dans leur vie. « *Les enfants et leurs familles souffrent au milieu de la violence armée et fuient la violence armée, les attaques contre leurs maisons et leurs écoles, les enlèvements, la violence sexuelle et le recrutement dans les groupes armés* », avait confié **Toby Fricker** porte-parole du Fonds lors d’un point de presse à Genève.  Selon cette organisation, il faudrait au moins  **20 millions de dollars**, soit environ **11 milliards de FCFA** pour répondre efficacement à l’urgence dans les régions du Nord-Ouest et du Sud-Ouest cette année. Par ailleurs, les dépenses d’éducation au Cameroun représentaient **13,8%** des dépenses du gouvernement en 2013 soit **3%** de son PIB.

<https://ecomatin.net/crise-anglophone-plus-de-3-milliards-fcfa-debloques-pour-assurer-la-rentree-scolaire-dans-le-no-so/>

1. **Crise anglophone : les grandes lignes du discours de Paul Biya**

Le chef de l’Etat a annoncé, mardi soir, la tenue d’un « grand dialogue national » sur la situation socio-politique dans les régions du Nord-Ouest et du Sud-Ouest, dès la fin du mois de septembre 2019.

[**EcoMatin**](https://ecomatin.net/author/admin8664/) [Suivre sur Twitter](https://twitter.com/ECOMatin1)[Envoyer un courriel](mailto:articles.ecomatin@gmail.com)10 septembre 2019Dernière mise à jour: 23 novembre 2021

**Paul Biya** s’est adressé, ce mardi 10 septembre 2019 à 20 heures, à la nation camerounaise. Un seul thème à l’ordre du jour : **la crise anglophone**. Dans son allocution télévisée, il a annoncé la convocation d’un « **grand dialogue national** » pour essayer  de trouver une solution à même de résoudre le conflit qui frappe les régions du Nord-Ouest et du Sud-Ouest depuis octobre 2016*. « Le moment est venu de mobiliser toutes les forces positives et constructives de notre pays, à l’intérieur comme à la diaspora pour que ce désir devienne une réalité. C’est pourquoi j’ai décidé de convoquer dès la fin du mois en cours un grand dialogue national qui nous permettra, dans le cadre de notre Constitution, d’examiner les voies et moyens de répondre aux aspirations profondes des populations du Nord-Ouest et du Sud-Ouest*», a dit le Chef de l’Etat dans son discours.

Paul Biya a précisé que le dialogue dont il est question concernera principalement la situation dans les régions du NO/SO. Mais il est évident  qu’il toucherait aussi à des questions d’intérêt national. Telles que : l’unité nationale, l’intégration nationale, le vivre ensemble. Car, ces sujets, selon lui, ne sauraient intéresser uniquement les populations de ces deux régions. L’objectif de ce dialogue, a-t-il évoqué, est de « réunir les fils de notre pays autour des valeurs  qui nous sont chères : la paix, la sécurité, la concorde nationale et le progrès. Il s’articulera également autour des questions fondamentales comme le bilinguisme, la diversité culturelle et la cohésion sociale. La reconstruction et le développement des hommes touchés par le conflit. Le retour des réfugiés et des personnes déplacées, le système éducatif et judiciaire. La décentralisation et le développement local. La démobilisation et la réinsertion des ex-combattants, le rôle de la diaspora dans le développement du pays… »

Pour le président de la République, ce « grand dialogue national », sera présidé par le Premier ministre chef du gouvernement. L’événement devra rassembler une palette de personnalités parlementaires, hommes politiques, leaders d’opinion, opérateurs économiques, autorités traditionnelles, autorités religieuses, membres de la diaspora. Mais aussi, des représentants de forces de défense et de sécurité, des groupes armés et des victimes de, etc.

D’autre part, le Chef de l’Etat, a souligné que dans le cadre d’un dialogue, d’un processus de paix ou d’une renonciation nationale, il est possible  d’envisager *« l’éventualité d’un pardon dans certaines conditions » aux insurgés.*Sur la base de la constitution le chef de l’Etat est habilité à user d’un droit de grâce. Pour cela,  Paul Biya  a réitéré une offre de pardon à *« ceux qui volontairement déposent les armes ».* En revanche, a-t-il insisté, *« ceux qui persisterons à commettre des actes criminels, à violer les lois de la République »* feront faces aux forces de défense et de sécurité camerounaises et subiront toute la rigueur des Lois du pays. Il en est de même des promoteurs de la haine et de la violence installés dans certains pays étrangers. Selon le président, ils devront tôt ou tard rendent des comptes à la justice. A la fin de son allocution télévisée, laquelle durée une trentaine de minutes, le locataire du palais d’Etoudi a terminé ses propos en rappelant que *« le Cameroun restera un et indivisible ».*

<https://ecomatin.net/crise-les-grandes-lignes-discours-de-paul-biya/>

1. **Crise à EDC: ce qui est reproché à Théodore Nsangou**

Outre la mauvaise gestion financière de l’entreprise publique qui gère le barrage de Lom Pangar, le directeur général d’Electricity Development Corporation (EDC) est appelé à s’expliquer, entre autres, sur le climat social malsain qui prévaut au sein de cette structure.

[**EcoMatin**](https://ecomatin.net/author/admin8664/) [Suivre sur Twitter](https://twitter.com/ECOMatin1)[Envoyer un courriel](mailto:articles.ecomatin@gmail.com)4 juin 2018Dernière mise à jour: 8 novembre 2021

Le barrage de Lom Pangar serait donc en eaux troubles. Le directeur général de l’entreprise publique de patrimoine du secteur de l’électricité, Electricity Development Corporation (EDC) qui gère ce barrage situé dans la région de l’Est du Cameroun, Théodore Nsangou est au centre de nombreuses critiques. Un fait pas très courant au Cameroun vient de confirmer cette situation de crise au sein de cette entreprise, sa tutelle technique, le ministre de l’Eau et de l’Energie, Gaston Essomba Eloundou, lui a servi en date du 14 mai 2018, une demande d’explication, avec pour objet : « Mauvaise gestion à EDC/Barrage de Lom Pangar ». Cette demande d’explication fait ainsi suite aux nombreuses plaintes du Syndicat des travailleurs du secteur de développement des ouvrages de production, de transport et de régulation de l’électricité (Syntdoptre). Dans cette correspondance du membre du gouvernement adressée à Théodore Nsangou, il est demandé au DG de EDC de tenir un « rapport circonstancié » sur six points principaux. Notamment, « la situation critique du barrage [30 MW] », « la situation sociale au sein de ladite entreprise », « la mauvaise gestion comptable, financière et budgétaire [rapport 2015/2016 du commissaire aux comptes] », « le détournement du patrimoine de l’entreprise [vente frauduleuse des véhicules du projet] », « la gestion des faux diplômes » et « les faux marchés |pose de la 1ère pierre par le chef de l’Etat en 2012] ».

Avant cette sortie du MINEE, Gaston Essomba Eloundou, le Syntdoptre avait déjà menacé régulièrement d’entrer en grève. Le 12 mars 2018, par exemple, les syndicalistes ont écrit au directeur général d’EDC pour dénoncer le fait que la commission d’avancements qui devrait siéger chaque septembre de l’année, n’a eu lieu que deux fois, en neuf ans. Selon ce syndicat, les échelons automatiques du personnel de quatre années d’ancienneté sont gelés depuis la création d’EDC. A cela s’ajoutent les retenues sur salaires qui ne sont pas reversées à la Caisse nationale de prévoyance sociale (CNPS), soit plus de 800 millions FCFA de dettes, avec son corollaire de conséquences sur la vie des travailleurs qui sont privés de pension de retraite depuis neuf ans, sans allocations familiales, pas de prise en charge pour les accidentés de travail, encore moins la prise en charge des femmes enceintes. Par ailleurs, le Syndicat réclame le paiement des arriérés de salaire des 24 cadres recrutés en mai 2010 par le conseil d’administration; le calcul et le paiement des manques à gagner du personnel sont estimés à 450 millions FCFA, etc.

**Une gestion financière peu orthodoxe**

Outre la gestion jugée  chaotique du personnel de EDC, il est également reproché à Théodore Nsangou, une gestion financière peu orthodoxe. Certaines sources indiquent même qu’il serait attendu au Tribunal criminel spécial pour s’expliquer sur la gestion de la société dont il a la charge. Le directeur général de EDC est soupçonné de malversations financières et devrait s’expliquer sur la situation chaotique actuelle de cette entreprise. Cette entreprise du patrimoine de l’Etat du secteur de l’électricité traverse une importante crise sociale et financière avec des caisses vides. Les employés de EDC réclament des arriérés de salaires et menacent d’entrer en grève. Certaines sources au sein de l’entreprise renseignent que le directeur général aurait acquis deux véhicules 4X4 au prix de 198 000 000 F CFA, soit 99 000 000 F CFA par véhicule. Des faits sur lesquels Theodore Nsangou devrait s’expliquer et justifier l’effondrement de EDC qui aurait englouti des centaines de milliards de francs CFA. Les 15 milliards de capital social entièrement libérés par le ministère des Finances auraient été entièrement consommés en 4 ans et le barrage de Lom pangar manquerait déjà du carburant. D’où, le récent appel de détresse du DG, Theodore Nsangou à son président du conseil d’administration (PCA), Mengot Arrey.

En rappel, EDC est une entreprise publique camerounaise créée en 2006, qui opère dans le domaine de l’énergie électrique. Sa mission est d’accroître la production et la distribution de l’énergie électrique grâce au barrage de retenue d’eau de Lom Pangar, dont il est le maître d’ouvrage.

<https://ecomatin.net/crise-a-edc-ce-qui-est-reproche-a-theodore-nsangou/>

1. **Crise NOSO: Atanga Nji soupçonne l’ONU de détourner l’aide humanitaire**

Le ministre camerounais de l’Administration Territoriale, Paul ANtaga Nji, fait savoir que les quantités de cargaisons de denrées alimentaires annoncées préalablement pour secourir  les populations victimes de crise sécuritaire ne correspondent pas toujours à celles distribuées.

[**EcoMatin**](https://ecomatin.net/author/admin/) [Envoyer un courriel](mailto:ecomatin@yahoo.fr)6 mai 2019Dernière mise à jour: 16 novembre 2021

[Facebook](https://www.facebook.com/sharer.php?u=https://ecomatin.net/crise-noso-atanga-nji-soupconne-lonu-de-detourner-laide-humanitaire/) [Twitter](https://twitter.com/intent/tweet?text=Crise%20NOSO%3A%20Atanga%20Nji%20soup%C3%A7onne%20l%E2%80%99ONU%20de%20d%C3%A9tourner%20l%E2%80%99aide%20humanitaire&url=https://ecomatin.net/crise-noso-atanga-nji-soupconne-lonu-de-detourner-laide-humanitaire/) [Linkedin](https://www.linkedin.com/shareArticle?mini=true&url=https://ecomatin.net/crise-noso-atanga-nji-soupconne-lonu-de-detourner-laide-humanitaire/&title=Crise%20NOSO%3A%20Atanga%20Nji%20soup%C3%A7onne%20l%E2%80%99ONU%20de%20d%C3%A9tourner%20l%E2%80%99aide%20humanitaire) [Tumblr](https://www.tumblr.com/share/link?url=https://ecomatin.net/crise-noso-atanga-nji-soupconne-lonu-de-detourner-laide-humanitaire/&name=Crise%20NOSO%3A%20Atanga%20Nji%20soup%C3%A7onne%20l%E2%80%99ONU%20de%20d%C3%A9tourner%20l%E2%80%99aide%20humanitaire) [Pinterest](https://pinterest.com/pin/create/button/?url=https://ecomatin.net/crise-noso-atanga-nji-soupconne-lonu-de-detourner-laide-humanitaire/&description=Crise%20NOSO%3A%20Atanga%20Nji%20soup%C3%A7onne%20l%E2%80%99ONU%20de%20d%C3%A9tourner%20l%E2%80%99aide%20humanitaire&media=https://ecomatin.net/wp-content/uploads/2019/05/ecomatin.net-crise-noso-atanga-nji-soupconne-lonu-de-detourner-laide-humanitaire-noso2.jpg) [Reddit](https://reddit.com/submit?url=https://ecomatin.net/crise-noso-atanga-nji-soupconne-lonu-de-detourner-laide-humanitaire/&title=Crise%20NOSO%3A%20Atanga%20Nji%20soup%C3%A7onne%20l%E2%80%99ONU%20de%20d%C3%A9tourner%20l%E2%80%99aide%20humanitaire) [VKontakte](https://vk.com/share.php?url=https://ecomatin.net/crise-noso-atanga-nji-soupconne-lonu-de-detourner-laide-humanitaire/) [Odnoklassniki](https://connect.ok.ru/dk?st.cmd=WidgetSharePreview&st.shareUrl=https://ecomatin.net/crise-noso-atanga-nji-soupconne-lonu-de-detourner-laide-humanitaire/&description=Crise%20NOSO%3A%20Atanga%20Nji%20soup%C3%A7onne%20l%E2%80%99ONU%20de%20d%C3%A9tourner%20l%E2%80%99aide%20humanitaire&media=https://ecomatin.net/wp-content/uploads/2019/05/ecomatin.net-crise-noso-atanga-nji-soupconne-lonu-de-detourner-laide-humanitaire-noso2.jpg) [Pocket](https://getpocket.com/save?title=Crise%20NOSO%3A%20Atanga%20Nji%20soup%C3%A7onne%20l%E2%80%99ONU%20de%20d%C3%A9tourner%20l%E2%80%99aide%20humanitaire&url=https://ecomatin.net/crise-noso-atanga-nji-soupconne-lonu-de-detourner-laide-humanitaire/)

Le ministre camerounais de l’Administration territoriale (Minat), a tenu récemment  à Yaoundé une réunion de concertation avec le **Système des Nations unies au Cameroun**  à l’effet d’évaluer l’aide humanitaire acheminée dans les régions du **Nord-Ouest (NO) et du Sud-Ouest (SO)**. L’institution était représentée par **Allegra Mania Del Baiocchi**, coordonnatrice du Système des Nations-Unies au Cameroun. Paul Atanga Nji a profité de la circonstance pour exprimer son angoisse dans la gestion de l’aide humanitaire destinée aux populations victimes de la crise sécuritaire.

En effet, ces derniers temps, le Minat a reçu des rapports provenant des autorités administratives des régions du NO et du SO, sur la gestion de l’aide humanitaire. De ces analyses, il en ressort que les quantités annoncées au départ ne coïncident pas toujours à celles distribuées aux populations. « *Nous avons les mêmes problèmes tous les jours. Les préfets et les sous-préfets nous appellent pour dire : vraiment, on dit qu’il avait cinq camions de denrées, nous n’avons pas vu les camions. Est-ce que ces choses ont été distribuées aux fantômes ? Nous ne savons pas* », a-t-il martelé à Allegra Mania Del Baiocchi. Paul AtangaNji a ajouté que « *le Système des Nations-Unies travaille avec des Ongs sérieuses. Mais d’autres ne sont pas sérieuses, et nous assistons à des détournements de dons*».

**Vers la mise en place des relais locaux**

Pour corriger ces manquements, le  patron de l’administration territoriale  a proposé à la coordonnatrice du Système des Nations-Unies au Cameroun de mettre sur pied des relais locaux qui veilleront à la régularité des opérations de distribution de l’aide. Il s’agira selon le Minat, de créer des comités, des relais locaux qui s’assurent de la transparence, et surtout de la traçabilité des opérations. « *Si par exemple le Programme alimentaire mondiale (PAM) devait aller donner de l’aide à Kumba, à partir d’aujourd’hui, on va d’abord constater ces dons sur place. s’il y a 10 camions qui vont charger, que ce soient les denrées alimentaires, la protection civile va d’abord constater qu’effectivement ces dons ont été chargés dans un camion, et qu’ils sont à destination de Buea, Kumba, Mamfé*».

Le constat sera également fait sur le terrain par les autorités administratives. « *Arrivés sur place, dès lors que les sous-préfets et préfets, ou les gouverneurs ont également fait le constat effectif de l’arrivée de ces dons, en ce moment le système peut travailler avec ses agents sur place et les relais locaux que sont les ONG* », a expliqué le Minat.

<https://ecomatin.net/crise-noso-atanga-nji-soupconne-lonu-de-detourner-laide-humanitaire/>

1. **Les ventes de Dangote en baisse de 6% à cause de crise sécuritaire en zones anglophones**

Elles ont culminé à 886 000 tonnes au cours des neuf premiers mois de cette année contre 920 000 durant la même période l’année dernière.

[**EcoMatin**](https://ecomatin.net/author/admin8664/) [Suivre sur Twitter](https://twitter.com/ECOMatin1)[Envoyer un courriel](mailto:articles.ecomatin@gmail.com)4 novembre 2019Dernière mise à jour: 29 novembre 2021

[Facebook](https://www.facebook.com/sharer.php?u=https://ecomatin.net/les-ventes-de-dangote-en-baisse-de-6-a-cause-de-crise-securitaire-en-zones-anglophones/) [Twitter](https://twitter.com/intent/tweet?text=Les%20ventes%20de%20Dangote%20en%20baisse%20de%206%25%20%C3%A0%20cause%20de%20crise%20s%C3%A9curitaire%20en%20zones%20anglophones&url=https://ecomatin.net/les-ventes-de-dangote-en-baisse-de-6-a-cause-de-crise-securitaire-en-zones-anglophones/) [Linkedin](https://www.linkedin.com/shareArticle?mini=true&url=https://ecomatin.net/les-ventes-de-dangote-en-baisse-de-6-a-cause-de-crise-securitaire-en-zones-anglophones/&title=Les%20ventes%20de%20Dangote%20en%20baisse%20de%206%25%20%C3%A0%20cause%20de%20crise%20s%C3%A9curitaire%20en%20zones%20anglophones) [Tumblr](https://www.tumblr.com/share/link?url=https://ecomatin.net/les-ventes-de-dangote-en-baisse-de-6-a-cause-de-crise-securitaire-en-zones-anglophones/&name=Les%20ventes%20de%20Dangote%20en%20baisse%20de%206%25%20%C3%A0%20cause%20de%20crise%20s%C3%A9curitaire%20en%20zones%20anglophones) [Pinterest](https://pinterest.com/pin/create/button/?url=https://ecomatin.net/les-ventes-de-dangote-en-baisse-de-6-a-cause-de-crise-securitaire-en-zones-anglophones/&description=Les%20ventes%20de%20Dangote%20en%20baisse%20de%206%25%20%C3%A0%20cause%20de%20crise%20s%C3%A9curitaire%20en%20zones%20anglophones&media=https://ecomatin.net/wp-content/uploads/2019/11/ecomatin.net-les-ventes-de-dangote-en-baisse-de-6-a-cause-de-crise-securitaire-en-zones-anglophones-dangote-cement-752x440.jpg) [Reddit](https://reddit.com/submit?url=https://ecomatin.net/les-ventes-de-dangote-en-baisse-de-6-a-cause-de-crise-securitaire-en-zones-anglophones/&title=Les%20ventes%20de%20Dangote%20en%20baisse%20de%206%25%20%C3%A0%20cause%20de%20crise%20s%C3%A9curitaire%20en%20zones%20anglophones) [VKontakte](https://vk.com/share.php?url=https://ecomatin.net/les-ventes-de-dangote-en-baisse-de-6-a-cause-de-crise-securitaire-en-zones-anglophones/) [Odnoklassniki](https://connect.ok.ru/dk?st.cmd=WidgetSharePreview&st.shareUrl=https://ecomatin.net/les-ventes-de-dangote-en-baisse-de-6-a-cause-de-crise-securitaire-en-zones-anglophones/&description=Les%20ventes%20de%20Dangote%20en%20baisse%20de%206%25%20%C3%A0%20cause%20de%20crise%20s%C3%A9curitaire%20en%20zones%20anglophones&media=https://ecomatin.net/wp-content/uploads/2019/11/ecomatin.net-les-ventes-de-dangote-en-baisse-de-6-a-cause-de-crise-securitaire-en-zones-anglophones-dangote-cement-752x440.jpg) [Pocket](https://getpocket.com/save?title=Les%20ventes%20de%20Dangote%20en%20baisse%20de%206%25%20%C3%A0%20cause%20de%20crise%20s%C3%A9curitaire%20en%20zones%20anglophones&url=https://ecomatin.net/les-ventes-de-dangote-en-baisse-de-6-a-cause-de-crise-securitaire-en-zones-anglophones/)

*« Notre installation de broyage de clinker de****1,5 million de tonnes****à Douala a vendu environ****866 000 tonnes****de ciment les neuf premiers mois de l’année 2019, soit une baisse de****6%****par rapport aux****920 000 tonnes****vendues à la même période en 2018. Nous estimons que notre part de marché a été de 40% au cours de la période »,* révèle la filiale camerounaise du géant cimentier nigérian **Dangote.**

L’industriel nigérian explique que cette situation est liée principalement aux problèmes de sécurité qui secouent  les deux régions du Nord-ouest et du Sud-ouest, théâtre d’affrontements entre l’armée régulière et les militants séparatistes depuis octobre 2016. Elle a plombé les activités économiques du groupe tout comme de nombreuses autres entreprises dans différents secteurs, notamment agro-industrie, les télécoms, l’énergie…

Les ventes du cimentier nigérian se sont également moins bien comportées avec l’arrivée de nouveaux concurrents sur le marché camerounais, qui ont grignoté un point dans ses parts de marché élevées à 41% en 2018, selon les résultats rendus publics par l’entreprise. **Dangote** avait prévu d’améliorer sa logistique tout au long de l’année 2019, en étendant sa présence sur le marché et en rivalisant plus efficacement.

En outre, bien que l’usine du géant industriel au Cameroun (1,5 million de tonnes) repose principalement sur du clinker provenant d’autres pays d’Afrique, **Dangote** indique son intention de se fournir en clinker dans ses propres usines au Nigeria ou au Congo.

Les capacités de production de ciment installées au Cameroun se situent en 2018 autour de 3,7 millions de tonnes, à raison de 1,5million de tonnes, chacune, pour **Cimencam**et **Dangote**, 500 000 tonnes pour **Cimaf** et 200 000 tonnes pour **Medcem**. La production de ciment s’est élevée à **2,8 millions de tonnes**en 2017 et **2,9 millions** **de tonnes** en 2018. Avec les capacités de production installées, projetées par les opérateurs du secteur en 2019, le ministère de l’Economie classe **Dangote** comme leader du marché du ciment (45%), suivi de Cimencam (30%), Cimaf (22%) et Medcem (3%).

<https://ecomatin.net/les-ventes-de-dangote-en-baisse-de-6-a-cause-de-crise-securitaire-en-zones-anglophones/>

1. **Crise anglophone: il est temps de parler même de la forme de l’Etat**

Les innommables atrocités perpétrées dans le NOSO sont le produit direct de la radicalisation des sécessionnistes et du gouvernement. Le Directeur exécutif et Rédacteur en chef de EcoMatin livre la position éditoriale de votre journal sur cette tragédie nationale. Par Serge D. BONTSEBE

[**EcoMatin**](https://ecomatin.net/author/admin/) [Envoyer un courriel](mailto:ecomatin@yahoo.fr)26 octobre 2020Dernière mise à jour: 15 décembre 2021

[Facebook](https://www.facebook.com/sharer.php?u=https://ecomatin.net/il-est-temps-de-se-parler-de-tout-meme-de-la-forme-de-letat/) [Twitter](https://twitter.com/intent/tweet?text=Crise%20anglophone%3A%20il%20est%20temps%20de%20parler%20m%C3%AAme%20de%20la%20forme%20de%20l%E2%80%99Etat&url=https://ecomatin.net/il-est-temps-de-se-parler-de-tout-meme-de-la-forme-de-letat/) [Linkedin](https://www.linkedin.com/shareArticle?mini=true&url=https://ecomatin.net/il-est-temps-de-se-parler-de-tout-meme-de-la-forme-de-letat/&title=Crise%20anglophone%3A%20il%20est%20temps%20de%20parler%20m%C3%AAme%20de%20la%20forme%20de%20l%E2%80%99Etat) [Tumblr](https://www.tumblr.com/share/link?url=https://ecomatin.net/il-est-temps-de-se-parler-de-tout-meme-de-la-forme-de-letat/&name=Crise%20anglophone%3A%20il%20est%20temps%20de%20parler%20m%C3%AAme%20de%20la%20forme%20de%20l%E2%80%99Etat) [Pinterest](https://pinterest.com/pin/create/button/?url=https://ecomatin.net/il-est-temps-de-se-parler-de-tout-meme-de-la-forme-de-letat/&description=Crise%20anglophone%3A%20il%20est%20temps%20de%20parler%20m%C3%AAme%20de%20la%20forme%20de%20l%E2%80%99Etat&media=https://ecomatin.net/wp-content/uploads/2020/10/photosqd-e1603714301456.jpg) [Reddit](https://reddit.com/submit?url=https://ecomatin.net/il-est-temps-de-se-parler-de-tout-meme-de-la-forme-de-letat/&title=Crise%20anglophone%3A%20il%20est%20temps%20de%20parler%20m%C3%AAme%20de%20la%20forme%20de%20l%E2%80%99Etat) [VKontakte](https://vk.com/share.php?url=https://ecomatin.net/il-est-temps-de-se-parler-de-tout-meme-de-la-forme-de-letat/) [Odnoklassniki](https://connect.ok.ru/dk?st.cmd=WidgetSharePreview&st.shareUrl=https://ecomatin.net/il-est-temps-de-se-parler-de-tout-meme-de-la-forme-de-letat/&description=Crise%20anglophone%3A%20il%20est%20temps%20de%20parler%20m%C3%AAme%20de%20la%20forme%20de%20l%E2%80%99Etat&media=https://ecomatin.net/wp-content/uploads/2020/10/photosqd-e1603714301456.jpg) [Pocket](https://getpocket.com/save?title=Crise%20anglophone%3A%20il%20est%20temps%20de%20parler%20m%C3%AAme%20de%20la%20forme%20de%20l%E2%80%99Etat&url=https://ecomatin.net/il-est-temps-de-se-parler-de-tout-meme-de-la-forme-de-letat/)

 Par Serge D. Bontsebe

Depuis des mois, **EcoMatin**s’est refusé à la tentation, souvent vive, de mobiliser son tabloïd, qu’il a décidé de verrouiller sur les questions d’économie et de finance, pour parler de la crise politique et sécuritaire qui sévit dans les régions du Nord-Ouest et du Sud-Ouest.

Cela, était le rôle de son journal en ligne, **www.ecomatin.net** , mais surtout de ses excellents confrères généralistes et politiques, qui s’acquittent d’ailleurs si bien de leur mission. Mais l’attaque qui s’est produite hier, 24 octobre 2020 à Kumba, dans un collège, à l’issue de laquelle des assaillants non identifiés ont ôté la vie, en tirant de sang-froid et à bout portant à six enfants, est venue nous convaincre de ce que nous n’avions pas tracé notre ligne rouge éditoriale au bon endroit.

De toutes les façons, sans la paix, il est difficile de développer l’économie. Une chose fut d’y aller et une autre fut de trouver une orientation éditoriale pertinente à ce sujet. Et la discussion, sur ce dernier point, fut longue : se joindre à la vague de dénonciations, d’indignations et de colère qui a aussitôt suivi cet odieux acte, ou se demander, dès aujourd’hui, de quoi ces atrocités à répétition sont le nom et commencer à œuvrer, avec lucidité et courage, dès cette minute, quitte à paraître politiquement incorrects, à ce qu’ils ne se reproduisent plus.

Sans que la première option ne soit ni ignorée et ni incomprise, c’est la seconde, vous vous en rendez-compte, qui a emporté notre choix éditorial. Que les choses soient bien claires : il n’est, de notre point de vue, aucune cause qui justifie une telle bestialité. Aucune. Et, pour EcoMatin, l’Etat doit mettre en œuvre tous les moyens militaires dont il dispose pour mettre les auteurs de ces innommables actes hors d’état de nuire. Mais il n’est aussi, pour nous, aucun sacrifice, aucun compromis, aucun absolu qu’un Etat digne de ce nom ne puisse envisager et même accepter pour la paix et la concorde nationales. Aucun. Ce dont la crise anglophone est le nom, au-delà-de tout, c’est la contestation, par une partie du peuple camerounais, de la forme actuelle de l’Etat, et accessoirement, du processus qui a débouché sur l’unification du pays. D’avoir élevé cette forme de l’Etat (laquelle a du reste évolué depuis l’indépendance) au statut d’inviolable absolu et de l’avoir érigée, comme le font les intégristes religieux, en impardonnable blasphème, le gouvernement a choisi d’alimenter, par sa radicalisation sur ce point, le seul qui vaille, la radicalisation des contestataires anglophones, dont les égorgeurs du NOSO sont les avatars et les ombres meurtrières.

Il est temps de sortir de cette logique circulaire, de dialoguer entre fils d’une nation, de se pardonner, et de résoudre ce problème qui insulte l’intelligence des Camerounais depuis plus de quarante ans ! Il est temps, enfin, d’y travailler, vraiment, résolument, honnêtement, simplement.
C’est, selon EcoMatin, le seul hommage digne de la mémoire de toutes les victimes de cette honteuse guerre.

<https://ecomatin.net/il-est-temps-de-se-parler-de-tout-meme-de-la-forme-de-letat/>

1. **Massacres de Kumba : le prix de la radicalisation**

Après l’attaque perpétré samedi dernier à Kumba faisant 6 morts et 13 blessés, tous des élèves, l’opinion nationale et internationale est vent debout comme un seul homme pour condamner cet acte odieux et appeler au retour à la paix dans les deux régions anglophones du pays.

[**EcoMatin**](https://ecomatin.net/author/admin/) [Envoyer un courriel](mailto:ecomatin@yahoo.fr)26 octobre 2020Dernière mise à jour: 15 décembre 2021

 Sur le théâtre du drame

Carnage. Difficile de qualifier autrement les images qui ont circulé ce week-end à travers les médias sociaux et dans lesquelles on peut voir dans une salle de classe, des corps sans vie d’écoliers  étalés à même le sol entre les tables-banc, et voguant dans une mare de sang. Tout autour les pleurs d’adultes, qui découvrent visiblement cette boucherie humaine. La scène digne d’un film d’horreur est tournée le samedi 24 octobre 2020 à « Mothere Francisca international Academy », un établissement scolaire situé au quartier Fiango, arrondissement de Kumba 2, dans le département de la Mémé, région du Sud-Ouest Cameroun. Le gouvernement camerounais parle d’un attentat terroriste, perpétré  par les groupes armés séparatistes qui sévissent dans les régions anglophones du pays. Selon sa version des faits, c’est aux alentours de 11 heures qu’un groupe composé d’une dizaine de « terroristes sécessionnistes » a fait irruption à bord de trois motocyclette, dans l’enceinte de l’établissement et a froidement ouvert le feu sur les élèves se trouvant dans les salles de classe. Le premier bilan fait état de 6 morts, tous des élèves âgés entre 9 et 12 ans dont 5 filles et un garçon.  Par ailleurs 13 élèves ont été blessés, soit 10 filles et 3 garçons, et dont 7 cas avérés préoccupants. Le porte-parole du Gouvernement révèle à cet effet que le président de la république a instruit la prise en charge des blessés, lesquelles ont immédiatement été évacués dans les établissements sanitaires dans les villes de Buéa, Kumba et Mutenguene.

**Condamnation tous azimuts**

Ce énième acte de barbarie n’a pas laissé indifférent l’opinion nationale et internationale. A travers son ambassade au Cameroun, les Etats unis sont montés au créneau pour condamner « dans les termes les plus vifs » cet acte odieux. « Les enfants devraient pouvoir exercer leur droit d’aller à l’école sans craindre pour leur sécurité » peut-on lire sur le communiqué de presse de cette représentation diplomatique. Pour la délégation de l’Union européenne au Cameroun, cette attaque constitue une violation du droit international sur les populations civiles. Les responsables devront« répondre de leurs actes». Même son de cloches du côté de l’ambassade de France au Cameroun, l’ambassadeur s’est dit « révulsé par le massacre d’enfants dans une école », il appelle à une mise en commun des efforts pour mettre un terme au conflit dans les régions anglophones.

**Lire aussi** : [Crise anglophone : pourquoi me Akere Muna a claqué la porte du dialogue](https://ecomatin.net/crise-anglophone-pourquoi-me-akere-muna-a-claque-la-porte-du-dialogue/)

Au plan national, les acteurs politiques du pouvoir comme de l’opposition ne sont pas restés indifférents. «Les enfants qui voulaient seulement assurer l’avenir du Cameroun en prenant leurs leçons à l’école ! STOP à la barbarie. Trop c’est Trop! STOP STOP STOP! » Martèle Grégoire Owona, sécétaire général adjoint du RDPC et par ailleurs Ministre du Travail et de la Sécurité sociale(Mintss). Tout en dénonçant ces actes empreints de barbarie, l’opposition ne manque pas d’indexer la responsabilité du pouvoir en place dans la recherche des solutions. « Combien de morts faut-il encore pour qu’une solution politique ramène la paix dans le NOSO ? » s’interroge Maurice Kamto, le président du Mrc. « Ce manquement a de fait transformé les élèves en bouclier humain, la responsabilité du régime est formellement établie» a dénoncé l’honorable Jean Michel Nitcheu, Député du Social Democratic Front(Sdf). L’Honorable Cabral Libii, président du Prcn n’y est pas allé de main morte et appelle le président de la république à mettre les deux régions en état d’urgence. « L’Etat doit prendre ses responsabilités avec une fermeté à la mesure de l’horreur » a-t-il déclaré.

Au moment où nous mettions sous-presse, le président de la république lui-même ne s’était pas encore officiellement exprimé sur la question. Néanmoins, sous son instruction, le Premier Ministre Joseph Dion Ngute, a envoyé une délégation interministérielle à Kumba pour réconforter les familles endeuillées. Ces sorties de personnalités publiques reflètent en quelque sorte l’indignation collective qui s’est emparée des camerounais depuis samedi dernier. Comme un deuil national, le son des pleurs se fait de plus en plus ressentir et le désir d’un retour à la paix, de plus en plus sollicité.

**Bilan humain : la crise Humanitaire la plus négligée au monde**

Ce 24 octobre 2020, ce sont six écoliers (selon le premier bilan) qui ont été froidement abattus dans l’enceinte de leur établissement à Kumba, chef-lieu du département de la Meme, région du Sud-ouest. Un crime attribué à des hommes armés, présentés par le gouvernement comme des combattants séparatistes. Hier [14 février dernier, Ndlr], ce sont 13 personnes dont plusieurs femmes et enfants, qui sont tombés sous des balles de l’armée à Ngarbuh, un village de l’arrondissement de Ndu, département du Ndonga-Mantung, région du Nord-ouest.

Outre ces massacres, la chronique sociale est ainsi alimentée depuis quatre par les « nouvelles » tristes qui viennent de Nord-ouest et du Sud-ouest. Paysans, travailleurs humanitaires, agents publics, autorités administratives et traditionnelles, forces de défense et de sécurité, c’est un jeu de massacre qui se déroule dans ces deux régions depuis que la crise sociopolitique née en octobre 2016 s’est muée fin 2017 en une insurrection armée puis en mini-guérilla, aujourd’hui réduite en de multiples « groupuscules » de bandits de grands chemins, selon les pouvoirs publics, instaurant dans cette partie du pays un véritable climat de terreur.

**Lire aussi** : [Crise anglophone : qui est l’américain Herman Cohen, interlocuteur des sécessionnistes pour le dialogue](https://ecomatin.net/crise-anglophone-qui-est-lamericain-herman-cohen-interlocuteur-des-secessionnistes-pour-le-dialogue/)

**170 villages détruits**

Dans un rapport paru en mai 2019, l’ONG International crisis group (ICG) estimait à 1 850 morts, 530 000 déplacés internes, des dizaines de milliers de réfugiés et plus de 150 villages détruits. Dans le rapport de suivi du Plan de riposte humanitaire, le coordinateur national du Bureau des Nations Unies des Affaires humanitaires au Cameroun (Ocha), Allegra Baiocchi, indique que « les régions du Nord-Ouest et du Sud-Ouest ont fait l’objet d’une recrudescence d’attaques contre des personnes, de leurs biens et des infrastructures publiques, notamment des centres de santé et des écoles, ainsi que d’incidents persistants contre des travailleurs humanitaires et du personnel médical. » Ce qui entraine une situation humanitaire alarmante.

A fin juin 2020, le Bureau-Cameroun de Ocha estime que « près de 680 000 Camerounais sont désormais déplacés à l’intérieur du pays en raison de cette crise principalement dans les régions du Nord-Ouest et du Sud-Ouest, mais aussi dans l’Ouest et le Littoral. 58 000 personnes supplémentaires ont cherché refuge au Nigéria voisin. » L’organisme onusien ajoute que les communautés déplacées ont des besoins aigus en matière de protection, de nourriture, d’abris, d’articles non alimentaires, d’eau et d’assainissement ainsi que d’accès à la santé et à l’éducation.

Malheureusement, sur le financement de 390,9 millions de dollars nécessaire pour le Plan de riposte humanitaire pour la prise en charge des différentes crises que subies le Cameroun  dont celle de Boko Haram dans le bassin du Lac Tchad, les réfugiés centrafricains dans la région de l’Est et la crise anglophone, seuls 147,1 millions de dollars ont déjà été provisionnés par les différents bailleurs de fonds soit 38% de l’enveloppe. Pour ce qui est spécifiquement de la crise dans le Nord-ouest et le Sud-Ouest, seulement 31,9 millions de dollars ont déjà été débloqués sur les 166,2 millions de dollars nécessaires soit 19,2%.

On peut comprendre dès lors pourquoi en se basant sur le manque de financement, le manque d’attention médiatique et la négligence politique, l’ONG « Conseil Norvégien pour les Réfugiés (NRC) », indique dans son classement annuel publié le 7 juin 2019 que « la crise humanitaire qui sévit dans les régions anglophones au Cameroun est la crise humanitaire et de déplacement (de personnes) la plus négligée au monde.» Selon l’ONG présente dans le pays depuis 2017, « nous devons en finir avec cette paralysie de la communauté internationale. Chaque jour que dure ce conflit, la rancœur se renforce et la région se rapproche dangereusement d’une guerre sans merci.»

**Bilan socioéconomique : 88% des entreprises impactées par la crise anglophone**

L’insécurité qui sévit dans les régions du Sud-Ouest et Nord-Ouest a des incidences économiques globales qui ne peuvent plus être négligées. Dans une étude sur « l’état de l’environnement des affaires au Cameroun », le groupement interpatronal du Cameroun (Gicam) relève que l’insécurité dans les régions du Nord-Ouest et du Sud-Ouest touche plus de 88% des entreprises camerounaises, indépendamment de leur taille. Plus précisément, 90,3% chez des grandes entreprises ; 90% chez des moyennes entreprises ; et 82,6% chez des petites entreprises. C’est la version actualisée du rapport sur les « conséquences économiques et impacts sur l’activité des entreprises » que le patronat a commis en juillet 2018.

En effet depuis 2016, des revendications identitaires dans les deux régions ont progressivement dérivé vers un conflit larvé aux conséquences économiques qui sont aujourd’hui particulièrement désastreuses. Selon le Gicam, le tissu économique des Régions du Nord-Ouest et Sud-Ouest qui constituent près de 20% de la population camerounaise, s’effondre littéralement, tout au moins en ce qui concerne le secteur formel et les répercussions se font de plus en plus ressentir dans le reste du pays. Toutes les entreprises menant directement ou indirectement des activités dans ces régions indiquent que leurs activités y sont désormais en berne.

**Lire aussi** : [Crise anglophone : le grand Dialogue national se tiendra du 30 septembre au 4 octobre 2019 à Yaoundé](https://ecomatin.net/crise-anglophone-le-grand-dialogue-national-se-tiendra-du-30-septembre-au-4-octobre-2019-a-yaounde/)

**Zones économiquement sinistrées**

La situation se caractérise par la fermeture de la plupart des unités de production installées dans ces régions ; le retrait de la présence commerciale pour les entreprises qui y avaient des agences et autres représentations ; la rupture involontaire des contrats avec les partenaires et sous-traitants couvrant ces régions ; le renforcement des mesures de sécurité autour des installations encore opérationnelles et pour les employés qui y travaillent encore, ce qui renchérit considérablement les coûts opérationnels ; l’annulation des plans d’extension, d’investissement et de négociations avec des partenaires étrangers qui se basent souvent sur la capacité de leurs partenaires locaux à s’étendre et conquérir de nouveaux marchés, etc.

Entre 2017 et 2018, la crise actuelle a entrainé une perte de 56 milliards (20%) de recettes d’exportation pour la filière café-cacao. En plus de la filière café-cacao, les deux régions sont aussi des bassins importants pour d’autres filières dans l’agriculture industrielle d’exportation (thé, palmier à huile, hévéa) et l’agriculture vivrière. Les manques à gagner concernant les filières de l’agriculture vivrière sont difficiles à estimer mais devraient être conséquentes puisque les deux régions représentent environ 20% des productions nationales de Maïs, Manioc, Pomme de terre, Haricot et Banane douce.

Au-delà des filières cacao et café, c’est aussi une menace sur le commerce extérieur qui est affecté étant donné le poids de ces produits dans la génération des devises dans notre pays.

**Interview**


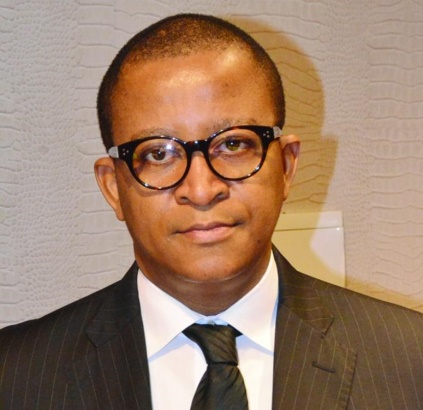
**Christian Pout**

**« Il faut nommer un chef politique pour résoudre cette crise »**

L’internationaliste et Président du Centre Africain d’Etudes Internationales, Diplomatiques, Economiques et Stratégiques (CEIDES) estime que les atrocités qui sont commises dans ces régions et qui durent depuis quatre ans devraient amener le gouvernement à adapter sa stratégie de résolution de cette crise.

**Le gouvernement indique une fois encore que les bandes armées qui sévissent dans le Nord-Ouest et le Sud-Ouest sont financées et soutenues à partir de «pays amis». Quels moyens peut-il mobiliser pour contraindre ces pays à «lâcher» ces financiers ?**

Sur le plan international, ces questions sont délicates et particulièrement complexes. Certes, il y a le comité des sanctions du Conseil de Sécurité des Nations Unies qui peut être activé. Mais les choses ne sont pas si simples. Il y a un travail de terrain, technique, bref un travail de fonds qui doit au préalable être mené. Il faut tout d’abord que les auteurs de ces actes soient interpellés et exploités, pour que des preuves tangibles et définitives soient apportées au soutien de la démonstration de leurs liens directs avec des personnes résidant hors du Cameroun. Donc il faut que le lien entre tel commanditaire et tel auteur des faits dénoncés soit clairement établi, et que ces commanditaires présumés, qui peuvent bénéficier des protections consulaires de leurs pays de résidence s’ils en ont acquis les nationalités, soient répertoriées et soient clairement identifiés dans une liste exhaustive. D’autre part, l’Etat du Cameroun doit rester extrêmement vigilant et surveiller les mouvements de fonds internationaux en provenance ou à destination du Cameroun, dans le cadre des dispositifs internationaux de lutte contre le financement du terrorisme et de la loi nationale contre le terrorisme. Ce n’est qu’à ce moment que le Cameroun peut engager des actions avec ses partenaires bilatéraux et les organisations internationales dont il est membre, pour que ces commanditaires présumés soient neutralisés à leur tour.

Le Cameroun peut alors demander, dans le cadre des mécanismes internationaux, un renforcement de sa coopération avec des pays comme le Nigeria, l’Afrique du Sud, entre autres. Enfin, il ne faut pas perdre de vue le fait que dans les relations internationales, il y a une matrice dont il faut toujours tenir compte : le rapport de force : Quand un pays du sud est-il parvenu à contraindre un pays du nord à engager ou à arrêter des opérations qui préjudicient à ses intérêts ? Il faut remonter au cas du Nicaragua avec les opérations militaires américaines sur son sol (la fameuse la [guerre des Bananes](https://fr.wikipedia.org/wiki/Guerre_des_Bananes), ndlr). Or c’était dans le contexte de la guerre froide, qui n’est plus le même aujourd’hui. Il y a donc une véritable fenêtre d’actions diplomatiques à mener, car autant Boko Haram et les organisations qui lui sont affilées sont reconnus au plan international comme organisations terroristes, autant les groupes qui sévissent dans les régions du Nord-Ouest et du Sud-Ouest ne le sont pas. Donc il y a un travail de terrain d’identification claire de ces groupes armés, et un autre, celui-là diplomatique, de leur inscription dans les listes internationales d’organisations terroristes. A partir de ce moment, nous pourrons œuvrer, dans le cadre de la coopération bilatérale et des organisations internationales dont nous sommes membres, à isoler diplomatiquement ces bandes armées et leurs soutiens internationaux.

**Pourquoi le gouvernement n’y parvient pas depuis 4 ans ?**

Le problème avec la crise dans les régions du Nord-Ouest et du Sud-Ouest, au plan international, se trouve à deux niveaux : d’abord il y a aujourd’hui dans le monde tellement d’enjeux, tellement de crises qui préoccupent au plus haut point les puissances internationales qu’il est difficile de l’inscrire dans leur agenda. Ensuite, il y a le fait que dès le déclenchement de la crise, nous avons-nous-mêmes, dans notre communication, fait valoir le fait qu’il s’agit d’un problème camerouno-camerounais, et que nous allions le régler en interne. Nos partenaires bilatéraux et multilatéraux en ont pensé que nous ne voulions pas d’aide, notamment sur le volet politique et diplomatique du problème. A l’époque, nous mobilisions deux principes forts des relations internationales : la souveraineté internationale de notre pays, et la non-ingérence de la communauté internationale dans les affaires internes d’un Etat souverain. Or il y a une grande différence entre ingérence et appui technique. Je pense que l’un des points à améliorer, dans notre communication, serait de reconnaître cette différence. Il nous faut commencer par convaincre tous nos partenaires que cette crise est une crise partagée, pour parvenir à mobiliser toutes les forces politiques et diplomatiques disponibles. Il nous faut arriver à modifier l’attitude de la communauté internationale au sujet de cette crise en imposant l’idée qu’il s’agit d’une crise locale certes, mais dont les ressorts, les enjeux et la résolution sont globaux. Mais pour y parvenir, il faudra intégrer la position de la communauté internationale qui pense, de manière principielle, que tous ceux qui font partie du problème doivent faire partie de la solution.

**«Un des points à améliorer», dites-vous. Ce qui veut dire que vous en avez pointez d’autres…**

Oui. Et pas seulement sur la communication. Un sujet d’examen à notre avis, c’est le processus de Désarmement, de Démobilisation et de Réinsertion (DDR) des groupes armés qui sévissent dans ces régions. Nous avons engagé ce DDR sans «Gentlement Agrement» avec la partie en face. De ma modeste expérience et de mes modestes lectures, nulle part dans le monde cela n’a marché ainsi. Pour que le processus de DDR marche, il faut au préalable qu’un accord politique, même à minima, soit trouvé entre les forces en présence.

Autre sujet d’examen enfin, l’option militaire qui, dans les faits, domine la réponse officielle à cette crise. Or lisez les plus grands militaires au monde, ils vous diront que le rôle de l’armée dans les théâtres de conflit est avant tout de créer une alternative dans la résolution du conflit. Les militaires veillent à sécuriser les populations, les installations et les équipements collectifs, mais n’ont pas vocation à régler le conflit. Pour la résolution de cette crise, nous proposons que le chef de l’Etat désigne un Haut-Commissaire dédié, qui aurait la haute main sur les aspects politiques et diplomatiques du conflit et qu’ainsi, à côté du chef de guerre, il y ait un chef politique. Ce dernier pourra alors constituer des équipes dédiées avec une chaîne civile comme dans l’armée, et prendre en charge l’ensemble des volets civils de la crise, et solliciter l’assistance technique internationale en matière de résolution des crises de cette nature. Il y a un savoir-faire international en cette matière, mobilisons-le. Et ce ne serait pas porter préjudice à notre souveraineté nationale. Que je sache, les forces spéciales camerounaises engagées dans ce conflit et dans d’autres sont bien équipées et entraînées, dans le cadre de coopérations militaires bien précises, par des partenaires internationaux !

Nous devons profiter de la célébration de l’an 1 du Grand Dialogue National (GDN) pour mener une évaluation sans complaisance de notre stratégie de résolution de cette crise, identifier clairement les erreurs et manquements éventuels et engager résolument un véritable travail de politique de la paix, à la hauteur des attentes des populations meurtries.

<https://ecomatin.net/massacres-de-kumba-le-prix-de-la-radicalisation/>

1. **Crise anglophone : le « grand » dialogue national se tiendra du 30 septembre au 4 octobre 2019 à Yaoundé**

Cette initiative du chef de l’Etat pour tenter de résoudre la crise sécuritaire en zone anglophone sera présidée par le Premier ministre chef du gouvernement, Joseph Dion Ngute.

[**EcoMatin**](https://ecomatin.net/author/admin8664/) [Suivre sur Twitter](https://twitter.com/ECOMatin1)[Envoyer un courriel](mailto:articles.ecomatin@gmail.com)19 septembre 2019Dernière mise à jour: 23 novembre 2021

[Facebook](https://www.facebook.com/sharer.php?u=https://ecomatin.net/crise-anglophone-le-grand-dialogue-national-se-tiendra-du-30-septembre-au-4-octobre-2019-a-yaounde/) [Twitter](https://twitter.com/intent/tweet?text=Crise%20anglophone%20%3A%20le%20%C2%AB%20grand%20%C2%BB%20dialogue%20national%20se%20tiendra%20du%2030%20septembre%20au%204%20octobre%202019%20%C3%A0%20Yaound%C3%A9&url=https://ecomatin.net/crise-anglophone-le-grand-dialogue-national-se-tiendra-du-30-septembre-au-4-octobre-2019-a-yaounde/) [Linkedin](https://www.linkedin.com/shareArticle?mini=true&url=https://ecomatin.net/crise-anglophone-le-grand-dialogue-national-se-tiendra-du-30-septembre-au-4-octobre-2019-a-yaounde/&title=Crise%20anglophone%20%3A%20le%20%C2%AB%20grand%20%C2%BB%20dialogue%20national%20se%20tiendra%20du%2030%20septembre%20au%204%20octobre%202019%20%C3%A0%20Yaound%C3%A9) [Tumblr](https://www.tumblr.com/share/link?url=https://ecomatin.net/crise-anglophone-le-grand-dialogue-national-se-tiendra-du-30-septembre-au-4-octobre-2019-a-yaounde/&name=Crise%20anglophone%20%3A%20le%20%C2%AB%20grand%20%C2%BB%20dialogue%20national%20se%20tiendra%20du%2030%20septembre%20au%204%20octobre%202019%20%C3%A0%20Yaound%C3%A9) [Pinterest](https://pinterest.com/pin/create/button/?url=https://ecomatin.net/crise-anglophone-le-grand-dialogue-national-se-tiendra-du-30-septembre-au-4-octobre-2019-a-yaounde/&description=Crise%20anglophone%20%3A%20le%20%C2%AB%20grand%20%C2%BB%20dialogue%20national%20se%20tiendra%20du%2030%20septembre%20au%204%20octobre%202019%20%C3%A0%20Yaound%C3%A9&media=https://ecomatin.net/wp-content/uploads/2019/09/ecomatin.net-crise-les-grandes-lignes-discours-de-paul-biya-paul-biya-10-septembre.jpg) [Reddit](https://reddit.com/submit?url=https://ecomatin.net/crise-anglophone-le-grand-dialogue-national-se-tiendra-du-30-septembre-au-4-octobre-2019-a-yaounde/&title=Crise%20anglophone%20%3A%20le%20%C2%AB%20grand%20%C2%BB%20dialogue%20national%20se%20tiendra%20du%2030%20septembre%20au%204%20octobre%202019%20%C3%A0%20Yaound%C3%A9) [VKontakte](https://vk.com/share.php?url=https://ecomatin.net/crise-anglophone-le-grand-dialogue-national-se-tiendra-du-30-septembre-au-4-octobre-2019-a-yaounde/) [Odnoklassniki](https://connect.ok.ru/dk?st.cmd=WidgetSharePreview&st.shareUrl=https://ecomatin.net/crise-anglophone-le-grand-dialogue-national-se-tiendra-du-30-septembre-au-4-octobre-2019-a-yaounde/&description=Crise%20anglophone%20%3A%20le%20%C2%AB%20grand%20%C2%BB%20dialogue%20national%20se%20tiendra%20du%2030%20septembre%20au%204%20octobre%202019%20%C3%A0%20Yaound%C3%A9&media=https://ecomatin.net/wp-content/uploads/2019/09/ecomatin.net-crise-les-grandes-lignes-discours-de-paul-biya-paul-biya-10-septembre.jpg) [Pocket](https://getpocket.com/save?title=Crise%20anglophone%20%3A%20le%20%C2%AB%20grand%20%C2%BB%20dialogue%20national%20se%20tiendra%20du%2030%20septembre%20au%204%20octobre%202019%20%C3%A0%20Yaound%C3%A9&url=https://ecomatin.net/crise-anglophone-le-grand-dialogue-national-se-tiendra-du-30-septembre-au-4-octobre-2019-a-yaounde/)

5 jours. C’est le temps prévu par le président de la République pour la tenue du « **grand » dialogue national** annoncé le 10 septembre dernier.  Sous sa convocation, l’événement se tiendra du 30 septembre au 4 octobre 2019, au Palais des Congres à Yaoundé sous la coordination du Premier ministre, chef du gouvernement **Joseph Dion Ngute**.

L’objectif de ce dialogue, avait précisé**Paul Biya** le 10 septembre, est de réunir les voies et moyens pour favoriser un retour à la paix dans les régions du Nord-Ouest et du Sud-Ouest. Il est question de réunir « *les fils de notre pays autour des valeurs qui nous sont chères : la paix, la sécurité, la concorde nationale et le progrès. Il s’articulera également autour des questions fondamentales comme le bilinguisme, la diversité culturelle et la cohésion sociale. La reconstruction et le développement des hommes touchés par le conflit. Le retour des réfugiés et des personnes déplacées, le système éducatif et judiciaire. La décentralisation et le développement local. La démobilisation et la réinsertion des ex-combattants, le rôle de la diaspora dans le développement du pays, etc* », précisait-il.

**>> Lire aussi –**[**Crise anglophone : les grandes lignes du discours de Paul Biya**](https://ecomatin.net/crise-les-grandes-lignes-discours-de-paul-biya/)

L’événement devra rassembler une palette de personnalités parlementaires, hommes politiques, leaders d’opinion, opérateurs économiques, autorités traditionnelles, autorités religieuses, membres de la diaspora. Mais aussi, des représentants de forces de défense et de sécurité, des groupes armés et des victimes de, etc.

**>> Lire aussi –**[**Grand dialogue national : ce que pense la fille de l’ancien Chef de l’Etat Ahmadou Ahidjo**](https://ecomatin.net/grand-dialogue-national-ce-que-pense-la-fille-de-lancien-chef-de-letat-ahmadou-ahidjo/)

Il est à noter que le 1er octobre interviendra-en plein grand dialogue national la date anniversaire de la réunification des deux Cameroun anglophone et francophone. Des plateformes numériques ont été créées pour suivre les activités liées au grand dialogue national au Cameroun ([www.nationaldialogue.cm](http://nationaldialogue.cm/)).

C’est depuis 2016 que les régions du NO/SO se sont animées par des tensions, suite à des revendications corporatistes des avocats et enseignants anglophones. Ces mouvements d’humeur ont ensuite dégénéré en revendications indépendantistes à partir de 2017, transformant ces deux régions anglophones du Cameroun en théâtre d’affrontements entre l’armée régulière et les militants séparatistes.

**>> Lire aussi –**[**Grand dialogue nationale : les exigences de Maurice Kamto**](https://ecomatin.net/grand-dialogue-nationale-maurice-kamto-et-ses-allies-veulent-participer-libres/)

Dans ces zones (NO/SO) où vivent **20%** de la population camerounaise de nombreuses pertes économiques ont déjà été enregistrées à cause de l’insécurité. Selon une étude du **Gicam** publiée en 2018, **86%** des entreprises présentes ces territoires affirment que la crise a eu des répercussions négatives très importantes (**50%**), et importantes (36%) sur leurs activités. Selon les estimations sommaires réalisées, la crise a déjà coûté **2,153 milliards FCFA** en termes de destructions de biens immobiliers, de matériels roulants et meubles. Le manque à gagner en termes de chiffres d’affaires est estimé à **269,056 milliards FCFA** dans les secteurs investigués : industries agroalimentaires, agro-industries locales, télécommunications, filière café – cacao, services agricoles et distribution.

<https://ecomatin.net/crise-anglophone-le-grand-dialogue-national-se-tiendra-du-30-septembre-au-4-octobre-2019-a-yaounde/>

1. **Répercussions: Eneo rallonge la liste des victimes économiques de la crise anglophone**

Du fait de cette crise sociopolitique qui secoue depuis trois ans les régions du Nord-Ouest et du Sud-Ouest, le concessionnaire du service public de l’électricité au Cameroun, révèle avoir enregistré un manque à gagner d’environs 10 milliards de FCFA sur ses ventes annuelles de 2018.

[**EcoMatin**](https://ecomatin.net/author/admin8664/) [Suivre sur Twitter](https://twitter.com/ECOMatin1)[Envoyer un courriel](mailto:articles.ecomatin@gmail.com)21 octobre 2019Dernière mise à jour: 25 novembre 2021

[Facebook](https://www.facebook.com/sharer.php?u=https://ecomatin.net/repercussions-eneo-rallonge-la-liste-des-victimes-economiques-de-la-crise-anglophone/) [Twitter](https://twitter.com/intent/tweet?text=R%C3%A9percussions%3A%20Eneo%20rallonge%20la%20liste%20des%20victimes%20%C3%A9conomiques%20de%20la%20crise%20anglophone&url=https://ecomatin.net/repercussions-eneo-rallonge-la-liste-des-victimes-economiques-de-la-crise-anglophone/) [Linkedin](https://www.linkedin.com/shareArticle?mini=true&url=https://ecomatin.net/repercussions-eneo-rallonge-la-liste-des-victimes-economiques-de-la-crise-anglophone/&title=R%C3%A9percussions%3A%20Eneo%20rallonge%20la%20liste%20des%20victimes%20%C3%A9conomiques%20de%20la%20crise%20anglophone) [Tumblr](https://www.tumblr.com/share/link?url=https://ecomatin.net/repercussions-eneo-rallonge-la-liste-des-victimes-economiques-de-la-crise-anglophone/&name=R%C3%A9percussions%3A%20Eneo%20rallonge%20la%20liste%20des%20victimes%20%C3%A9conomiques%20de%20la%20crise%20anglophone) [Pinterest](https://pinterest.com/pin/create/button/?url=https://ecomatin.net/repercussions-eneo-rallonge-la-liste-des-victimes-economiques-de-la-crise-anglophone/&description=R%C3%A9percussions%3A%20Eneo%20rallonge%20la%20liste%20des%20victimes%20%C3%A9conomiques%20de%20la%20crise%20anglophone&media=https://ecomatin.net/wp-content/uploads/2019/10/ecomatin.net-repercussions-eneo-rallonge-la-liste-des-victimes-economiques-de-la-crise-anglophone-l-immeuble-siege-d-eneo-en-sanaga-ocean-cameroon-info-p-net-800xm9x.jpg) [Reddit](https://reddit.com/submit?url=https://ecomatin.net/repercussions-eneo-rallonge-la-liste-des-victimes-economiques-de-la-crise-anglophone/&title=R%C3%A9percussions%3A%20Eneo%20rallonge%20la%20liste%20des%20victimes%20%C3%A9conomiques%20de%20la%20crise%20anglophone) [VKontakte](https://vk.com/share.php?url=https://ecomatin.net/repercussions-eneo-rallonge-la-liste-des-victimes-economiques-de-la-crise-anglophone/) [Odnoklassniki](https://connect.ok.ru/dk?st.cmd=WidgetSharePreview&st.shareUrl=https://ecomatin.net/repercussions-eneo-rallonge-la-liste-des-victimes-economiques-de-la-crise-anglophone/&description=R%C3%A9percussions%3A%20Eneo%20rallonge%20la%20liste%20des%20victimes%20%C3%A9conomiques%20de%20la%20crise%20anglophone&media=https://ecomatin.net/wp-content/uploads/2019/10/ecomatin.net-repercussions-eneo-rallonge-la-liste-des-victimes-economiques-de-la-crise-anglophone-l-immeuble-siege-d-eneo-en-sanaga-ocean-cameroon-info-p-net-800xm9x.jpg) [Pocket](https://getpocket.com/save?title=R%C3%A9percussions%3A%20Eneo%20rallonge%20la%20liste%20des%20victimes%20%C3%A9conomiques%20de%20la%20crise%20anglophone&url=https://ecomatin.net/repercussions-eneo-rallonge-la-liste-des-victimes-economiques-de-la-crise-anglophone/)

Les entreprises paient un lourd tribut de la crise sociopolitique qui perdure dans les régions du Nord-Ouest et du Sud-Ouest. On estime globalement à plus de **269 milliards de FCFA** le manque à gagner enregistré par certaines entreprises depuis le début de cette crise en 2016. Les secteurs les plus impactés étant l’agroalimentaire et la filière café-cacao. Pour l’heure, c’est **Eneo Cameroon**, le concessionnaire du service public de l’électricité au Cameroun, qui vient de rallonger la liste des victimes économiques de cette crise. Dans son rapport d’activités 2018, qui vient d’être rendu public, Eneo révèle avoir perdu **10 milliards de FCFA** sur ses ventes annuelles, en raison de cette crise sociopolitique.

Cette entreprise contrôlée par le fonds d’investissement britannique **Actis**rallonge ainsi la liste des entreprises qui paient au prix fort les revendications séparatistes dans cette partie du pays depuis 2016. Parmi ces entreprises, l’on retrouve en première ligne la Cameroon Development Corporation (**CDC**), 2e employeur du pays après l’administration publique. Disparue du fichier des exportateurs de bananes depuis septembre 2018, cette unité agroindustrielle publique a officiellement perdu **32 milliards de FCFA** en 2018 dans la branche banane. Les branches huile de palme et caoutchouc tournent également au ralenti, à cause de l’insécurité. Parmi les grandes victimes économiques de la crise anglophone, il y a également la filière cacao camerounaise. En effet, du fait de la crise, la région du Sud-Ouest a perdu son leadership national en matière de production de fèves au profit de la région du Centre.

Dans le même temps, plusieurs négociants installés dans cette partie du Cameroun ont dû délocaliser leurs activités. Dans le secteur des télécoms, en plus de vandaliser ses équipements, les militants séparatistes mettent en péril, **60%** des parts de marché contrôlées par **MTN Cameroon** dans les régions du Nord-Ouest et du Sud-Ouest. Dans le même temps, **Dangote Cement Cameroun**, lui, a annoncé une chute de ses ventes de **7,1%** au premier semestre 2019, à cause de l’insécurité dans la partie anglophone du pays

<https://ecomatin.net/repercussions-eneo-rallonge-la-liste-des-victimes-economiques-de-la-crise-anglophone/>

1. **Amnistie : arrêt des poursuites judiciaires contre 333 prisonniers de la crise anglophone**

Le président de la République a écouté les doléances de certaines personnalités qui demandaient la relaxe de ces prévenus pour une meilleure conduite du processus de retour à la paix dans les régions du Nord-ouest et du Sud-ouest.

[**EcoMatin**](https://ecomatin.net/author/admin8664/) [Suivre sur Twitter](https://twitter.com/ECOMatin1)[Envoyer un courriel](mailto:articles.ecomatin@gmail.com)3 octobre 2019Dernière mise à jour: 23 novembre 2021

 115 Temps de lecture 1 minute

[Facebook](https://www.facebook.com/sharer.php?u=https://ecomatin.net/amnistie-arret-des-poursuites-judiciaires-contre-333-prisonniers-de-la-crise-anglophone/) [Twitter](https://twitter.com/intent/tweet?text=Amnistie%20%3A%20arr%C3%AAt%20des%20poursuites%20judiciaires%20contre%20333%20prisonniers%20de%20la%20crise%20anglophone&url=https://ecomatin.net/amnistie-arret-des-poursuites-judiciaires-contre-333-prisonniers-de-la-crise-anglophone/) [Linkedin](https://www.linkedin.com/shareArticle?mini=true&url=https://ecomatin.net/amnistie-arret-des-poursuites-judiciaires-contre-333-prisonniers-de-la-crise-anglophone/&title=Amnistie%20%3A%20arr%C3%AAt%20des%20poursuites%20judiciaires%20contre%20333%20prisonniers%20de%20la%20crise%20anglophone) [Tumblr](https://www.tumblr.com/share/link?url=https://ecomatin.net/amnistie-arret-des-poursuites-judiciaires-contre-333-prisonniers-de-la-crise-anglophone/&name=Amnistie%20%3A%20arr%C3%AAt%20des%20poursuites%20judiciaires%20contre%20333%20prisonniers%20de%20la%20crise%20anglophone) [Pinterest](https://pinterest.com/pin/create/button/?url=https://ecomatin.net/amnistie-arret-des-poursuites-judiciaires-contre-333-prisonniers-de-la-crise-anglophone/&description=Amnistie%20%3A%20arr%C3%AAt%20des%20poursuites%20judiciaires%20contre%20333%20prisonniers%20de%20la%20crise%20anglophone&media=https://ecomatin.net/wp-content/uploads/2019/10/ecomatin.net-amnistie-arret-des-poursuites-judiciaires-contre-333-prisonniers-de-la-crise-anglophone-journalducameroun.com-prison-centrale-de-kondengui-780x440.jpg) [Reddit](https://reddit.com/submit?url=https://ecomatin.net/amnistie-arret-des-poursuites-judiciaires-contre-333-prisonniers-de-la-crise-anglophone/&title=Amnistie%20%3A%20arr%C3%AAt%20des%20poursuites%20judiciaires%20contre%20333%20prisonniers%20de%20la%20crise%20anglophone) [VKontakte](https://vk.com/share.php?url=https://ecomatin.net/amnistie-arret-des-poursuites-judiciaires-contre-333-prisonniers-de-la-crise-anglophone/) [Odnoklassniki](https://connect.ok.ru/dk?st.cmd=WidgetSharePreview&st.shareUrl=https://ecomatin.net/amnistie-arret-des-poursuites-judiciaires-contre-333-prisonniers-de-la-crise-anglophone/&description=Amnistie%20%3A%20arr%C3%AAt%20des%20poursuites%20judiciaires%20contre%20333%20prisonniers%20de%20la%20crise%20anglophone&media=https://ecomatin.net/wp-content/uploads/2019/10/ecomatin.net-amnistie-arret-des-poursuites-judiciaires-contre-333-prisonniers-de-la-crise-anglophone-journalducameroun.com-prison-centrale-de-kondengui-780x440.jpg) [Pocket](https://getpocket.com/save?title=Amnistie%20%3A%20arr%C3%AAt%20des%20poursuites%20judiciaires%20contre%20333%20prisonniers%20de%20la%20crise%20anglophone&url=https://ecomatin.net/amnistie-arret-des-poursuites-judiciaires-contre-333-prisonniers-de-la-crise-anglophone/)

*« J’ai décidé ce jour de l’****arrêt****des poursuites pendants devant les****tribunaux militaires****contre****333 personnes****arrêtées et détenues, pour des délits commis dans le cadre de la crise dans les régions du Nord-ouest et du Sud-ouest »*, a annoncé **Paul Biya,** président de la République du Cameroun, sur son compte Tweeter en fin de journée du 3 octobre 2019.

Une annonce confirmée par un communiqué du secrétaire général de la présidence de la République. Selon **Ferdinand Ngoh Ngoh**, la décision du chef de l’Etat sera mise à exécution « sans délai, à la diligence du ministre délégué à la présidence chargé de la Défense ». Qui soutient que la décision de **Paul Biya** procède « de sa volonté constante de permettre à ceux de nos jeunes compatriotes de ces deux régions, désireux de renoncer à la violence et de revenir dans le droit chemin, de pouvoir de nouveau participer à la grande œuvre de **construction nationale** ».

Au-delà des visées propagandistes que peuvent contenir ces mots du Sgpr, il faut noter que la décision du **président Biya** est un bon coup politique puisqu’elle intervient alors que les travaux du **Grand Dialogue National** (GDN) se déroulent pour trouver des solutions à la **crise** qui sévit dans les deux régions concernées.

Du côté du palais des Congrès de Yaoundé, on a pu observer la satisfaction des participants, notamment ceux qui, en grand nombre, avait proposé de libérer lesdits prévenus pour que le GDN se tienne dans des conditions d’apaisement des cœurs. De l’avis d’un participant, la décision de Paul est non seulement un geste d’apaisement, mais aussi une monnaie d’échange envers ceux des groupes qui restent radicaux.

Ce vendredi, le GDN ferme ses portes avec, espèrent les observateurs de tous bords, des recommandations fortes pouvant mettre fin au choc sécuritaire qui dure depuis trois années.

<https://ecomatin.net/amnistie-arret-des-poursuites-judiciaires-contre-333-prisonniers-de-la-crise-anglophone/>

1. **Crise anglophone : pourquoi Me Akere Muna a claqué la porte du Dialogue**

Le leader du mouvement NOW explique que les jeux sont pipés d’avance et qu’il ne voulait plus jouer le rôle de spectateur au cours de ces assises.

[**EcoMatin**](https://ecomatin.net/author/admin8664/) [Suivre sur Twitter](https://twitter.com/ECOMatin1)[Envoyer un courriel](mailto:articles.ecomatin@gmail.com)2 octobre 2019Dernière mise à jour: 23 novembre 2021

[Facebook](https://www.facebook.com/sharer.php?u=https://ecomatin.net/crise-anglophone-pourquoi-me-akere-muna-a-claque-la-porte-du-dialogue/) [Twitter](https://twitter.com/intent/tweet?text=Crise%20anglophone%20%3A%20pourquoi%20Me%20Akere%20Muna%20a%20claqu%C3%A9%20la%20porte%20du%20Dialogue&url=https://ecomatin.net/crise-anglophone-pourquoi-me-akere-muna-a-claque-la-porte-du-dialogue/) [Linkedin](https://www.linkedin.com/shareArticle?mini=true&url=https://ecomatin.net/crise-anglophone-pourquoi-me-akere-muna-a-claque-la-porte-du-dialogue/&title=Crise%20anglophone%20%3A%20pourquoi%20Me%20Akere%20Muna%20a%20claqu%C3%A9%20la%20porte%20du%20Dialogue) [Tumblr](https://www.tumblr.com/share/link?url=https://ecomatin.net/crise-anglophone-pourquoi-me-akere-muna-a-claque-la-porte-du-dialogue/&name=Crise%20anglophone%20%3A%20pourquoi%20Me%20Akere%20Muna%20a%20claqu%C3%A9%20la%20porte%20du%20Dialogue) [Pinterest](https://pinterest.com/pin/create/button/?url=https://ecomatin.net/crise-anglophone-pourquoi-me-akere-muna-a-claque-la-porte-du-dialogue/&description=Crise%20anglophone%20%3A%20pourquoi%20Me%20Akere%20Muna%20a%20claqu%C3%A9%20la%20porte%20du%20Dialogue&media=https://ecomatin.net/wp-content/uploads/2019/10/ecomatin.net-crise-anglophone-pourquoi-me-akere-muna-a-claque-la-porte-du-dialogue-me-akere-muna-890x395-c.jpg) [Reddit](https://reddit.com/submit?url=https://ecomatin.net/crise-anglophone-pourquoi-me-akere-muna-a-claque-la-porte-du-dialogue/&title=Crise%20anglophone%20%3A%20pourquoi%20Me%20Akere%20Muna%20a%20claqu%C3%A9%20la%20porte%20du%20Dialogue) [VKontakte](https://vk.com/share.php?url=https://ecomatin.net/crise-anglophone-pourquoi-me-akere-muna-a-claque-la-porte-du-dialogue/) [Odnoklassniki](https://connect.ok.ru/dk?st.cmd=WidgetSharePreview&st.shareUrl=https://ecomatin.net/crise-anglophone-pourquoi-me-akere-muna-a-claque-la-porte-du-dialogue/&description=Crise%20anglophone%20%3A%20pourquoi%20Me%20Akere%20Muna%20a%20claqu%C3%A9%20la%20porte%20du%20Dialogue&media=https://ecomatin.net/wp-content/uploads/2019/10/ecomatin.net-crise-anglophone-pourquoi-me-akere-muna-a-claque-la-porte-du-dialogue-me-akere-muna-890x395-c.jpg) [Pocket](https://getpocket.com/save?title=Crise%20anglophone%20%3A%20pourquoi%20Me%20Akere%20Muna%20a%20claqu%C3%A9%20la%20porte%20du%20Dialogue&url=https://ecomatin.net/crise-anglophone-pourquoi-me-akere-muna-a-claque-la-porte-du-dialogue/)

Il a fallu à peine 24 heures pour que le **malaise** se fasse ressentir au Palais des Congrès de Yaoundé où se tiennent, depuis lundi 30 septembre, les travaux du **Grand Dialogue National**. Plusieurs personnalités ont en effet décidé de claquer la porte pour diverses raisons. Parmi elles, celle de **Me Akere Muna**, leader du mouvement NOW, originaire de la zone anglophone  gravement touchée par un choc sécuritaire depuis trois années.

Les raisons pour lesquelles il a décidé de quitter la table des discussions sont nombreuses. « Quand nous nous sommes retrouvés en plénière, je me suis senti spectateur », commence l’ancien Bâtonnier au Barreau du Cameroun. D’après lui, les personnalités ayant pris la parole durant cette séance de travail avaient été choisies d’avance. De même que les **commissions**et leurs présidents.

Bien plus, il s’offusque du fait que les **thématiques**avaient été déterminées, mais sans être au préalable distribuées afin que chacun puisse choisir quelle commission intégrer. Encore que les personnes chargées de la gestion de ces commissions sont les mêmes à l’origine des problèmes, souligne l’avocat, condamnant le fait que les dignitaires du pays soient les plus présents dans les dites commissions.

**Me Akere Muna** dénonce en filigrane un **complot** qui aurait été ourdi contre les **anglophones**. « J’ai constaté un phénomène assez rare dans le déroulement des affaires publiques dans notre pays : sur huit commissions, six sont présidées par les anglophones, l’ensemble des travaux sont présidées par un anglophone, le patron du comité technique est un anglophone (…) Si ça se solde par un échec, on dira que c’était géré par les anglophones », soutient le candidat à la présidentielle d’octobre 2018.

« Dans ce contexte-là, je ne pouvais pas cautionner ce qui se passe », **Me Akere Muna**, qui se dit déçu. Surtout parce qu’après l’annonce du Grand Dialogue National par le président **Paul Biya** – qu’il avait d’ailleurs saluée – il a remis un document au **Premier ministre, Joseph Dion Ngute**, dans lequel étaient recensées ses propositions. « Si ça les intéresse, ils n’ont qu’à s’en inspirer », indique-t-il. Me Akere Muna proposait, entre autres, le retour de nouveau au **fédéralisme** pour ramener la paix et la stabilité, en soulignant qu’il est important d’y aller car le courant fédéraliste est en train de s’effriter à l’avantage du sécessionnisme. *« Les****sécessionnistes****sont déjà à****70%****. Après ces travaux, si on n’a pas un document clair sur comment rectifier le tir, le taux d’anglophones favorables à la sécession va augmenter »,* prévient-il.

<https://ecomatin.net/crise-anglophone-pourquoi-me-akere-muna-a-claque-la-porte-du-dialogue/>

# Crise anglophone : qui est l’Américain Herman Cohen interlocuteur des sécessionnistes pour le dialogue

Ancien ambassadeur des USA, il a accepté de représenter les leaders de l’Etat virtuel anglophone comme négociateur dans un contexte où les derniers préparatifs du Grand dialogue national sont en cours.

[**EcoMatin**](https://ecomatin.net/author/admin8664/) [Suivre sur Twitter](https://twitter.com/ECOMatin1)[Envoyer un courriel](mailto:articles.ecomatin@gmail.com)27 septembre 2019Dernière mise à jour: 23 novembre 2021

 431 Temps de lecture 1 minute

[Facebook](https://www.facebook.com/sharer.php?u=https://ecomatin.net/crise-anglophone-qui-est-lamericain-herman-cohen-interlocuteur-des-secessionnistes-pour-le-dialogue/) [Twitter](https://twitter.com/intent/tweet?text=Crise%20anglophone%20%3A%20%20qui%20est%20l%E2%80%99Am%C3%A9ricain%20Herman%20Cohen%20interlocuteur%20des%20s%C3%A9cessionnistes%20pour%20le%20dialogue&url=https://ecomatin.net/crise-anglophone-qui-est-lamericain-herman-cohen-interlocuteur-des-secessionnistes-pour-le-dialogue/) [Linkedin](https://www.linkedin.com/shareArticle?mini=true&url=https://ecomatin.net/crise-anglophone-qui-est-lamericain-herman-cohen-interlocuteur-des-secessionnistes-pour-le-dialogue/&title=Crise%20anglophone%20%3A%20%20qui%20est%20l%E2%80%99Am%C3%A9ricain%20Herman%20Cohen%20interlocuteur%20des%20s%C3%A9cessionnistes%20pour%20le%20dialogue) [Tumblr](https://www.tumblr.com/share/link?url=https://ecomatin.net/crise-anglophone-qui-est-lamericain-herman-cohen-interlocuteur-des-secessionnistes-pour-le-dialogue/&name=Crise%20anglophone%20%3A%20%20qui%20est%20l%E2%80%99Am%C3%A9ricain%20Herman%20Cohen%20interlocuteur%20des%20s%C3%A9cessionnistes%20pour%20le%20dialogue) [Pinterest](https://pinterest.com/pin/create/button/?url=https://ecomatin.net/crise-anglophone-qui-est-lamericain-herman-cohen-interlocuteur-des-secessionnistes-pour-le-dialogue/&description=Crise%20anglophone%20%3A%20%20qui%20est%20l%E2%80%99Am%C3%A9ricain%20Herman%20Cohen%20interlocuteur%20des%20s%C3%A9cessionnistes%20pour%20le%20dialogue&media=https://ecomatin.net/wp-content/uploads/2019/09/ecomatin.net-crise-anglophone-qui-est-lamericain-herman-cohen-interlocuteur-des-secessionnistes-pour-le-dialogue-fb-img-1537571025409.jpg) [Reddit](https://reddit.com/submit?url=https://ecomatin.net/crise-anglophone-qui-est-lamericain-herman-cohen-interlocuteur-des-secessionnistes-pour-le-dialogue/&title=Crise%20anglophone%20%3A%20%20qui%20est%20l%E2%80%99Am%C3%A9ricain%20Herman%20Cohen%20interlocuteur%20des%20s%C3%A9cessionnistes%20pour%20le%20dialogue) [VKontakte](https://vk.com/share.php?url=https://ecomatin.net/crise-anglophone-qui-est-lamericain-herman-cohen-interlocuteur-des-secessionnistes-pour-le-dialogue/) [Odnoklassniki](https://connect.ok.ru/dk?st.cmd=WidgetSharePreview&st.shareUrl=https://ecomatin.net/crise-anglophone-qui-est-lamericain-herman-cohen-interlocuteur-des-secessionnistes-pour-le-dialogue/&description=Crise%20anglophone%20%3A%20%20qui%20est%20l%E2%80%99Am%C3%A9ricain%20Herman%20Cohen%20interlocuteur%20des%20s%C3%A9cessionnistes%20pour%20le%20dialogue&media=https://ecomatin.net/wp-content/uploads/2019/09/ecomatin.net-crise-anglophone-qui-est-lamericain-herman-cohen-interlocuteur-des-secessionnistes-pour-le-dialogue-fb-img-1537571025409.jpg) [Pocket](https://getpocket.com/save?title=Crise%20anglophone%20%3A%20%20qui%20est%20l%E2%80%99Am%C3%A9ricain%20Herman%20Cohen%20interlocuteur%20des%20s%C3%A9cessionnistes%20pour%20le%20dialogue&url=https://ecomatin.net/crise-anglophone-qui-est-lamericain-herman-cohen-interlocuteur-des-secessionnistes-pour-le-dialogue/)

Pour négocier avec le gouvernement camerounais sur la situation dans les régions du Nord-Ouest et du Sud-Ouest, les leaders sécessionnistes ont annoncé, dans un communiqué publié le 26 septembre 2019 et rapidement partagée par les médias et sur les réseaux sociaux, la désignation **d’Herman Jay Cohen** en tant que médiateur clé des séparatistes.

Selon le site encyclopédique **Wikipedia**, **Herman J. Cohen** est un ancien vice-ministre américain pour les affaires africaines. Il a été ambassadeur des Etats-Unis au Sénégal et en Gambie entre 1977 et 1980. Agé de **87 ans**, il a ensuite occupé le poste de sous-secrétaire d’État principal au renseignement de 1980 à 1984. Il devient assistant spécial du président et directeur principal pour l’Afrique au Conseil de sécurité nationale des États-Unis de 1987 à 1989. Et secrétaire d’État adjoint aux affaires africaines de 1989 à 1993. Il aurait contribué à la résolution de plusieurs conflits armés en Afrique (l’Érythrée et l’Éthiopie ; Angola et Mozambique)

Avant sa désignation comme médiateur, **Cohen** mettait déjà en garde les sécessionnistes anglophones. Dans un message (en langue anglaise) sur son compte **Twitter** le 24 septembre 2019, le diplomate indiquait que les séparatistes anglophones perdraient un  soutien international vital  s’ils continuaient à refuser le dialogue. *« Les séparatistes camerounais perdront toute sympathie internationale s’ils continuent à refuser le dialogue. Au lieu de cela, ils devraient accepter le dialogue, mais comme conditions préalables, exiger la libération de tous les prisonniers politiques, un médiateur neutre et l’acceptation par le gouvernement de leur légitimité politique »,*peut-on lire sur son compte **Twitter**.

<https://ecomatin.net/crise-anglophone-qui-est-lamericain-herman-cohen-interlocuteur-des-secessionnistes-pour-le-dialogue/>

1. **Crise anglophone : le plan secret des séparatistes contre les multinationales**

7 leaders séparatistes réunis aux Etats-Unis invitent les entreprises internationales à ne signer aucun contrat économique portant sur les richesses des régions du Sud et du Nord-Ouest, avec l'Etat du Cameroun. Ces deux régions anglophones, munies d'importantes ressources, mais en proie à des troubles sécuritaires, se retrouvent au centre d'une guerre économique.

[**EcoMatin**](https://ecomatin.net/author/admin8664/) [Suivre sur Twitter](https://twitter.com/ECOMatin1)[Envoyer un courriel](mailto:articles.ecomatin@gmail.com)4 octobre 2018Dernière mise à jour: 9 novembre 2021

[Facebook](https://www.facebook.com/sharer.php?u=https://ecomatin.net/crise-anglophone-le-plan-secret-des-separatistes-contre-les-multinationales/) [Twitter](https://twitter.com/intent/tweet?text=Crise%20anglophone%20%3A%20le%20plan%20secret%20des%20s%C3%A9paratistes%20contre%20les%20multinationales&url=https://ecomatin.net/crise-anglophone-le-plan-secret-des-separatistes-contre-les-multinationales/) [Linkedin](https://www.linkedin.com/shareArticle?mini=true&url=https://ecomatin.net/crise-anglophone-le-plan-secret-des-separatistes-contre-les-multinationales/&title=Crise%20anglophone%20%3A%20le%20plan%20secret%20des%20s%C3%A9paratistes%20contre%20les%20multinationales) [Tumblr](https://www.tumblr.com/share/link?url=https://ecomatin.net/crise-anglophone-le-plan-secret-des-separatistes-contre-les-multinationales/&name=Crise%20anglophone%20%3A%20le%20plan%20secret%20des%20s%C3%A9paratistes%20contre%20les%20multinationales) [Pinterest](https://pinterest.com/pin/create/button/?url=https://ecomatin.net/crise-anglophone-le-plan-secret-des-separatistes-contre-les-multinationales/&description=Crise%20anglophone%20%3A%20le%20plan%20secret%20des%20s%C3%A9paratistes%20contre%20les%20multinationales&media=https://ecomatin.net/wp-content/uploads/2018/10/ecomatin.net-crise-anglophone-le-plan-secret-des-separatistes-contre-les-multinationales-secessionnistes.jpg) [Reddit](https://reddit.com/submit?url=https://ecomatin.net/crise-anglophone-le-plan-secret-des-separatistes-contre-les-multinationales/&title=Crise%20anglophone%20%3A%20le%20plan%20secret%20des%20s%C3%A9paratistes%20contre%20les%20multinationales) [VKontakte](https://vk.com/share.php?url=https://ecomatin.net/crise-anglophone-le-plan-secret-des-separatistes-contre-les-multinationales/) [Odnoklassniki](https://connect.ok.ru/dk?st.cmd=WidgetSharePreview&st.shareUrl=https://ecomatin.net/crise-anglophone-le-plan-secret-des-separatistes-contre-les-multinationales/&description=Crise%20anglophone%20%3A%20le%20plan%20secret%20des%20s%C3%A9paratistes%20contre%20les%20multinationales&media=https://ecomatin.net/wp-content/uploads/2018/10/ecomatin.net-crise-anglophone-le-plan-secret-des-separatistes-contre-les-multinationales-secessionnistes.jpg) [Pocket](https://getpocket.com/save?title=Crise%20anglophone%20%3A%20le%20plan%20secret%20des%20s%C3%A9paratistes%20contre%20les%20multinationales&url=https://ecomatin.net/crise-anglophone-le-plan-secret-des-separatistes-contre-les-multinationales/)

La crise dans les Régions du Sud et du Nord-ouest n’est pas que politique et sécuritaire. Elle est également économique. John Mbah Akuoh, Nelson Mangeh, Ntumfoyn Boh Herbert, Elvis Kometa, Samuel Sako, Lucas Cho Ayaba, leaders séparatistes des organisations Agc, l’Ig, le Morisc, le Roa, le Scyl, Scnc et le Consortium, envisagent faire main-basse sur les richesses des régions du Sud et du Nord-Ouest, dotées d’un important potentiel économique. Plan d’appropriation au sein d’un regroupement baptisé « Front line of the libération of Ambazonia ». Pour preuve, cette mise en garde des sécessionnistes anglophones sur les richesses minières, pétrolières, halieutiques ou touristiques de ces deux régions, à l’issue d’une réunion tenue les 17 et 18 septembre 2018 à Washington, la capitale politique des Etats-Unis.

Entre autres résolutions prises lors de cette concertation retransmise par vidéo-conférence en Chine, au Canada, en Grande Bretagne et à Chicago, figurent celle lancée à l’endroit des entreprises internationales. La 7ème, elle menace « toutes les entreprises internationales qui signeront des accords avec le Cameroun sur les ressources des amazoniens ». Ces dernières « ne pourront, ni les exploiter, et leurs contrats seront considérés comme des actes de vol ». Une mise en garde qui sonne comme un véritable hold-up  économique projeté, vues les potentialités de ces deux régions couvrant une superficie réunie de 42.710 km2. Avec un important potentiel économique. Pour de nombreux investisseurs, 16%,7%, le Sud-ouest présente un climat propice aux affaires, d’après une enquête de l’Institut national de la statistique menée en 2010 auprès de certains acteurs économiques nationaux et étrangers. Devant N’Gaoundéré, Douala et Yaoundé. Climat plutôt défavorable pour 25% de ces investisseurs. D’après la même étude intitulée « l’état de l’industrie camerounaise »,  57,1% de ces chefs d’entreprises jugent  « assez bon » le climat des affaires dans la région du Nord-ouest.

**Lire aussi :**[« Indépendance de l’Ambazonie » : un voile idéologique sur un juteux business](https://ecomatin.net/independance-de-lambazonie-un-voile-ideologique-sur-un-juteux-business/)

**Potentiel**

Cet environnement attractif a par conséquent développé un important tissu industriel  local. Avec 22 000 postes, la Cameroon Development Corporation (CDC) reste le premier employeur privé du Cameroun. Deuxième après l’Etat. Implantée dans la région du Sud-Ouest, la CDC dispose de plusieurs usines, plantations de palmier à huile, d’hévéa et de banane. Autre fleuron de l’économie camerounaise avec siège dans la Région du Sud-ouest, la Société nationale de raffinage (Sonara), spécialisée dans le traitement des produits pétroliers. Avec une capacité de production d’environ 2,2 millions de tonnes par an pour un capital de 23 milliards de FCFA, la Sonara  est plus que jamais au centre de toutes les attentions des belligérants. La Pamol, autre importante entreprise agroalimentaire située à Ekondo Titi, Région du Sud-ouest fait également partie de ces potentialités convoitées. En plus du fort potentiel de ressources énergétiques espéré de la rétrocession de la presqu’île de Bakassi au Cameroun par le Nigeria le 14 août 2008. La zone Sud-ouest est également dotée d’un important potentiel touristique, source considérable de devises et d’emplois pour les populations.

Le recensement général des entreprises (Rge), réalisé par l’Institut national de la statistique au cours de la période août-novembre 2009, a permis d’identifier 6487 entreprises et établissements en activité dans la région du Nord-Ouest. Elles sont estimées à près de 8000 en 2018. 88,3% sont des très petites entreprises (TPE), 9,4% des petites entreprises (PE), 2,0% des moyennes entreprises (Me) et 0,3% des grandes entreprises (Ge). En définitive, les régions du Nord-Ouest et du Sud-Ouest concentrent  respectivement 10,3% et 9,5% des très petites entreprises. La région du Sud-Ouest compte plus de 1500 entreprises, toutes catégories confondues. Avec 5 unités de productions industrielles, correspondant à 1,9% des grandes entreprises du pays. Alors que le Nord-Ouest est à 1,5%, selon l’Ins. Le Nord-Ouest et le Sud-Ouest occupent ainsi les 4ème et 5ème places nationales en termes de potentiel économique.

<https://ecomatin.net/crise-anglophone-le-plan-secret-des-separatistes-contre-les-multinationales/>

1. **Nord-Ouest/Sud-Ouest : le Plan d’assistance humanitaire d’urgence dans l’impasse**

Le déploiement de ce dispositif gouvernemental doté d’un budget de 12,7 milliards Fcfa est coincé, alors que près de 500.000 personnes sont menacées de famine dans les deux régions anglophones.

[**EcoMatin**](https://ecomatin.net/author/admin8664/) [Suivre sur Twitter](https://twitter.com/ECOMatin1)[Envoyer un courriel](mailto:articles.ecomatin@gmail.com)18 mars 2019Dernière mise à jour: 15 novembre 2021

[Facebook](https://www.facebook.com/sharer.php?u=https://ecomatin.net/nord-ouest-sud-ouest-le-plan-dassistance-humanitaire-durgence-dans-limpasse/) [Twitter](https://twitter.com/intent/tweet?text=Nord-Ouest%2FSud-Ouest%20%3A%20le%20Plan%20d%E2%80%99assistance%20humanitaire%20d%E2%80%99urgence%20dans%20l%E2%80%99impasse&url=https://ecomatin.net/nord-ouest-sud-ouest-le-plan-dassistance-humanitaire-durgence-dans-limpasse/) [Linkedin](https://www.linkedin.com/shareArticle?mini=true&url=https://ecomatin.net/nord-ouest-sud-ouest-le-plan-dassistance-humanitaire-durgence-dans-limpasse/&title=Nord-Ouest%2FSud-Ouest%20%3A%20le%20Plan%20d%E2%80%99assistance%20humanitaire%20d%E2%80%99urgence%20dans%20l%E2%80%99impasse) [Tumblr](https://www.tumblr.com/share/link?url=https://ecomatin.net/nord-ouest-sud-ouest-le-plan-dassistance-humanitaire-durgence-dans-limpasse/&name=Nord-Ouest%2FSud-Ouest%20%3A%20le%20Plan%20d%E2%80%99assistance%20humanitaire%20d%E2%80%99urgence%20dans%20l%E2%80%99impasse) [Pinterest](https://pinterest.com/pin/create/button/?url=https://ecomatin.net/nord-ouest-sud-ouest-le-plan-dassistance-humanitaire-durgence-dans-limpasse/&description=Nord-Ouest%2FSud-Ouest%20%3A%20le%20Plan%20d%E2%80%99assistance%20humanitaire%20d%E2%80%99urgence%20dans%20l%E2%80%99impasse&media=https://ecomatin.net/wp-content/uploads/2019/03/ecomatin.net-nord-ouest-sud-ouest-le-plan-dassistance-humanitaire-durgence-dans-limpasse-crise-anglophone-1.jpg) [Reddit](https://reddit.com/submit?url=https://ecomatin.net/nord-ouest-sud-ouest-le-plan-dassistance-humanitaire-durgence-dans-limpasse/&title=Nord-Ouest%2FSud-Ouest%20%3A%20le%20Plan%20d%E2%80%99assistance%20humanitaire%20d%E2%80%99urgence%20dans%20l%E2%80%99impasse) [VKontakte](https://vk.com/share.php?url=https://ecomatin.net/nord-ouest-sud-ouest-le-plan-dassistance-humanitaire-durgence-dans-limpasse/) [Odnoklassniki](https://connect.ok.ru/dk?st.cmd=WidgetSharePreview&st.shareUrl=https://ecomatin.net/nord-ouest-sud-ouest-le-plan-dassistance-humanitaire-durgence-dans-limpasse/&description=Nord-Ouest%2FSud-Ouest%20%3A%20le%20Plan%20d%E2%80%99assistance%20humanitaire%20d%E2%80%99urgence%20dans%20l%E2%80%99impasse&media=https://ecomatin.net/wp-content/uploads/2019/03/ecomatin.net-nord-ouest-sud-ouest-le-plan-dassistance-humanitaire-durgence-dans-limpasse-crise-anglophone-1.jpg) [Pocket](https://getpocket.com/save?title=Nord-Ouest%2FSud-Ouest%20%3A%20le%20Plan%20d%E2%80%99assistance%20humanitaire%20d%E2%80%99urgence%20dans%20l%E2%80%99impasse&url=https://ecomatin.net/nord-ouest-sud-ouest-le-plan-dassistance-humanitaire-durgence-dans-limpasse/)

Dévoilé depuis le 21 juin 2018, le Plan d’assistance humanitaire d’urgence pour les régions du Nord-Ouest et du Sud-Ouest, doté d’un budget prévisionnel de **12,7 milliards Fcfa**, peine toujours à se déployer sur le terrain. Entre autres domaines d’intervention identifiés comme prioritaires par le gouvernement au moment de la mise en place de ce dispositif, il y avait la protection des personnes déplacées, la fourniture des denrées alimentaires et des produits de première nécessité, les soins de santé, l’éducation, la reprise des activités économiques, notamment agricoles, le logement et la reconstitution des documents d’état-civil et des pièces administratives individuelles. Neuf mois après, seules des denrées alimentaires ont pu être apportées à quelques **60 345 personnes** dans **12** **arrondissements** réparties dans les deux régions, à en croire le ministre de l’Administration territoriale, **Paul Atanga Nji**, coordonnateur dudit plan.

A l’ouverture de la session de mars, mardi dernier à l’Assemblée nationale, le vice-président de cette chambre, **Joseph Mbah Ndam** du Social Democratic Front (SDF), élu dans la circonscription de **Batibo** dans le Nord-Ouest, a tiré la sonnette d’alarme, en indiquant que l’année dernière, plus que l’année surpassée, *« les femmes n’ont pas fait les champs* ». Conséquence, plusieurs dizaines de milliers de personnes déplacées « *n’ont rien à manger* », et « *la famine arrive*». Il faut relever que les milices se revendiquant du mouvement sécessionniste de l**’Ambazonie**, qui s’attaquent également aux activités de transport des marchandises et de voyages, multipliant ainsi braquages et pillages, ont contraint plusieurs familles à abandonner leurs activités agro-pastorales. Le spectre de la famine plane sur le Nord-Ouest depuis fin 2017. En août 2018, le coordonnateur du Programme national de veille et de renforcement de la sécurité alimentaire (Pnvrsa) du ministère de l’Agriculture et du Développement rural, **Marie-Jeanine Nkodo Atanga**, prévenait que près de **500.000 personnes**, soit **20%** des populations des zones concernées, pourraient se retrouver en situation de crise alimentaire en zone anglophone et dans la région de l’Ouest où il y a un afflux importants de déplacés de la crise sécessionniste, entre mars et mai 2019.

Sur le terrain, la situation est bien plus grave. Une enquête de l’Agence des États-Unis pour le développement international (Usaid), publiée fin février, révèle que c’est environ **1,4 million de personnes** qui sont déjà en insécurité alimentaire dans cette partie du Cameroun.

Dans le cadre de son Plan d’assistance humanitaire d’urgence, le gouvernement avait prévu, pour ce qui est du secteur agro-pastoral, un appui en intrants agricoles et en cheptel pour relancer les activités des populations rurales sinistrées. Mais, de toute évidence, ce dispositif ne sera mis en place qu’après le retour espéré de la paix dans le Nord-Ouest et le Sud-Ouest. Economiste et ancien consultant dans le Système des Nations unies, **Bernard Ouandji** a toujours pensé que ce dispositif gouvernemental visait davantage à anticiper sur une éventuelle initiative humanitaire du Conseil de sécurité de l’Onu. D’après lui, la forme de ce document est loin de se conformer  aux règles de l’art en matière de formulation d’un plan d’urgence humanitaire. Il n’est donc pas surpris que les bailleurs de fonds, qui suivent une méthodologie spécifique, ne se soient pas intéressés à ce plan gouvernemental.

Pour mémoire, le financement du Plan d’assistance humanitaire devait être assuré  par le budget de l’Etat, l’appel à la solidarité nationale comme cela avait déjà été le cas dans le cadre la guerre contre Boko Haram dans la région de l’Extrême-Nord, et la contribution des partenaires internationaux.

<https://ecomatin.net/nord-ouest-sud-ouest-le-plan-dassistance-humanitaire-durgence-dans-limpasse/>

1. **Zone anglophone: plus de 70 milliards d’encours de crédits impayés**

C'est la note salée pesante sur les microfinances des régions du Sud et du Nord-ouest. Impossible pour ces établissements de crédits de recouvrer les fonds accordés à leurs clients.

[**EcoMatin**](https://ecomatin.net/author/admin8664/) [Suivre sur Twitter](https://twitter.com/ECOMatin1)[Envoyer un courriel](mailto:articles.ecomatin@gmail.com)19 décembre 2018Dernière mise à jour: 11 novembre 2021

[Facebook](https://www.facebook.com/sharer.php?u=https://ecomatin.net/zone-anglophone-plus-de-70-milliards-dencours-de-credits-impayes/) [Twitter](https://twitter.com/intent/tweet?text=Zone%20anglophone%3A%20plus%20de%2070%20milliards%20d%E2%80%99encours%20de%20cr%C3%A9dits%20impay%C3%A9s&url=https://ecomatin.net/zone-anglophone-plus-de-70-milliards-dencours-de-credits-impayes/) [Linkedin](https://www.linkedin.com/shareArticle?mini=true&url=https://ecomatin.net/zone-anglophone-plus-de-70-milliards-dencours-de-credits-impayes/&title=Zone%20anglophone%3A%20plus%20de%2070%20milliards%20d%E2%80%99encours%20de%20cr%C3%A9dits%20impay%C3%A9s) [Tumblr](https://www.tumblr.com/share/link?url=https://ecomatin.net/zone-anglophone-plus-de-70-milliards-dencours-de-credits-impayes/&name=Zone%20anglophone%3A%20plus%20de%2070%20milliards%20d%E2%80%99encours%20de%20cr%C3%A9dits%20impay%C3%A9s) [Pinterest](https://pinterest.com/pin/create/button/?url=https://ecomatin.net/zone-anglophone-plus-de-70-milliards-dencours-de-credits-impayes/&description=Zone%20anglophone%3A%20plus%20de%2070%20milliards%20d%E2%80%99encours%20de%20cr%C3%A9dits%20impay%C3%A9s&media=https://ecomatin.net/wp-content/uploads/2018/12/ecomatin.net-zone-anglophone-plus-de-70-milliards-dencours-de-credits-impayes-les-regions-du-nord-et-du-sud-ouest-pesent-pres-de-200-milliards-de-fcfa-depargne-collectee-par-les-emf.jpg) [Reddit](https://reddit.com/submit?url=https://ecomatin.net/zone-anglophone-plus-de-70-milliards-dencours-de-credits-impayes/&title=Zone%20anglophone%3A%20plus%20de%2070%20milliards%20d%E2%80%99encours%20de%20cr%C3%A9dits%20impay%C3%A9s) [VKontakte](https://vk.com/share.php?url=https://ecomatin.net/zone-anglophone-plus-de-70-milliards-dencours-de-credits-impayes/) [Odnoklassniki](https://connect.ok.ru/dk?st.cmd=WidgetSharePreview&st.shareUrl=https://ecomatin.net/zone-anglophone-plus-de-70-milliards-dencours-de-credits-impayes/&description=Zone%20anglophone%3A%20plus%20de%2070%20milliards%20d%E2%80%99encours%20de%20cr%C3%A9dits%20impay%C3%A9s&media=https://ecomatin.net/wp-content/uploads/2018/12/ecomatin.net-zone-anglophone-plus-de-70-milliards-dencours-de-credits-impayes-les-regions-du-nord-et-du-sud-ouest-pesent-pres-de-200-milliards-de-fcfa-depargne-collectee-par-les-emf.jpg) [Pocket](https://getpocket.com/save?title=Zone%20anglophone%3A%20plus%20de%2070%20milliards%20d%E2%80%99encours%20de%20cr%C3%A9dits%20impay%C3%A9s&url=https://ecomatin.net/zone-anglophone-plus-de-70-milliards-dencours-de-credits-impayes/)

D’après **David Kegne**, expert des microfinances, « *l’industrie de la microfinance en Afrique centrale traverse un tournant décisif de son histoire, avec notamment plusieurs défis à relever*« . Qu’il cite: le référencement sur les principales plateformes de transparence mises en place par les partenaires d’appui à l’industrie de la microfinance, l’amélioration de la qualité du portefeuille de crédit, le taux du Portefeuille à risque (Par) en zone Cemac étant supérieur à **15%** alors que le maximum admis est de **5%,** l’adoption des principes de bonne gouvernance, un système d’information de gestion à consolider et la mise en place d’un dispositif de prévention et de gestion de crise. Des outils techniques de garantie de la transparence dans l’industrie de la microfinance.

Locomotive de la sous-région Afrique centrale avec un important secteur d’Etablissements de microfinances (**Emf**), le Cameroun n’en est pas épargné.  Notre pays compte depuis 2016, **412**Établissements de microfinances actives: **120** établissements de 1ère catégorie, **41** de 2ème, **9**de categorie **3** et **148** Emf évoluant en réseau.  Douala et Yaounde concentrent  ainsi près de **50%** des établissements de microfinances du Cameroun. Bamenda et Buea, les deux régions anglophones, du Nord-ouest et du Sud-ouest abritent **30%** de cet effectif. Soit **125** Etablissements de microfinances. Le total cumulé des Emf dans le Littoral, le Centre, le Nord-ouest et le Sud-ouest est finalement estimé à **87%.** Ce qui correspond à **15%** des activités bancaires.

*Le secteur emploie****11.000****personnes. Dans cette configuration, les régions du Nord et du Sud-ouest pèsent près de****200 milliards de FCFA****d’épargne collectée auprès de ses clients estimés à****700.000****sur le triangle national.*

*Malheureusement en zone anglophone, les dépôts de fonds, crédits octroyés et autres services financiers offerts par les établissements de microfinances ont chuté de moitié*« , révèle une source sur place. On estime d’ailleurs le volume de fonds accordés aux épargnants à **75 milliards de FCFA**. Une situation confirmée par David Kegne :  » *les encours de crédits impayés grimpent dans les régions du Sud et du Nord-ouest. Plus de****70 milliards de FCFA****d’encours de crédits sont aujourd’hui impossibles à rembourser*« , *dit l’expert avec certitude. Pour cause, « la recrudescence de la thésaurisation, le recul des investissements, la dispersion des clients etc*… », dus à la situation sociopolitique instable dans cette zone.

**Ahmadou Bello**, Chef de service de la Division des microfinances au Ministère des finances  indiquait récemment que l’épargne enregistrée par les Emf en 2016 est de **650 milliards de FCFA**, soit **16,5%** du système bancaire global. Toujours en 2016, les Emf ont accordés **350 milliards de FCFA** à leurs clients estimés à **2.100.000**  sur toute l’étendue du territoire camerounais. Participant ainsi à **10%** dans le financement à l’économie nationale. Le secteur emploie **11.000** personnes. Dans cette configuration, les régions du Nord et du Sud-ouest pèsent près de **200 milliards de FCFA** d’épargne collectée auprès de ses clients estimés à **700.000** sur le triangle national.

Malgré ce  dynamisme, les Emf du Cameroun  souffrent de nombreux dysfonctionnements que se propose d’éliminer progressivement, David Kegne, à travers la création du concept « *Itimac*« , Initiative pour la transparence dans l’industrie de la microfinance en Afrique centrale. L’expert explique : « *le concept Itimac vient du souci de contribuer au rayonnement de l’activité de la microfinance en zone Cemac à travers l’adoption des bonnes pratiques de gouvernance qui constitue le socle de la pérennité*« . Itimac met ainsi à la disposition des Emf quelques instruments essentiels: un benchmark annuel basé sur le total du bilan, le nombre de clients et des membres, l’encours de crédits et de dépôt, le volume de crédit distribué, le nombre d’employés, la rentabilité opérationnelle, le nombre d’agences et le portefeuille à risque (**Par**), un annuaire en ligne, des outils techniques, des foras d’échanges et même le concept « *Itimac Awards*« , récompensant les microfinances dans divers domaines : la transparence, l’inclusion financière, la création de richesse, le prix spécial du jury et le prix d’honneur du jury.

Le secteur reste néanmoins «*très vulnérable*« , d’après **Ahmadou Bello**. Du fait non seulement de l’impact négatif de la crise anglophone. Mais également à cause de nombreux dysfonctionnements: les politiques ruineuses  mises en place par les membres des conseils d’administration des Emf au détriment des épargnants, un système déficitaire de contrôle interne voulu par les dirigeants des EMF de notre pays, l’éloignement de certaines microfinances dans les villages reculés,  la mauvaise répartition géographique, le non-respect des dispositions contenues dans les divers cadres de régulation du secteur des EMF, notamment les **21**normes prudentielles édictées par le Régime Cemac, l’Acte uniforme Ohada, la Cobac ou le Ministère des finances, autorité monétaire participent par ailleurs de cette fébrilité. Même si David Kegne pense qu’il est impossible pour une Emf de respecter les 21 normes prudentielles requises. Il propose le respect « *des normes majeures*« , à savoir, « *les fonds propres, le respect des engagements des apparentés, une trésorerie équilibrée et une bonne tenue du taux du portefeuille à risque à moins de****5%.****Toutes ces bonnes pratiques n’auront plus de secrets pour les Emf, les banques, entreprises commerciales du Cameroun dans le cadre de la deuxième édition de l’Itimac placé sous les thèmes*  » principales innovations du nouveau règlement Cemac/Umac/Cobac », « *Banque-Microfinance: partenariat gagnant-perdant? »,*  » *Enjeux et défis de la digitalisation des services financiers en zone Cemac « .*

<https://ecomatin.net/zone-anglophone-plus-de-70-milliards-dencours-de-credits-impayes/>

1. **Grand dialogue national : retour sur les moments forts**

Les séances plénières de fermeture et de clôture du GDN se sont déroulées sans tracas, contrairement aux travaux en commissions qui ont connu de nombreux soubresauts.

[**EcoMatin**](https://ecomatin.net/author/admin8664/) [Suivre sur Twitter](https://twitter.com/ECOMatin1)[Envoyer un courriel](mailto:articles.ecomatin@gmail.com)7 octobre 2019Dernière mise à jour: 23 novembre 2021

[Facebook](https://www.facebook.com/sharer.php?u=https://ecomatin.net/grand-dialogue-national-retour-sur-les-moments-forts/) [Twitter](https://twitter.com/intent/tweet?text=Grand%20dialogue%20national%20%3A%20retour%20sur%20les%20moments%20forts&url=https://ecomatin.net/grand-dialogue-national-retour-sur-les-moments-forts/) [Linkedin](https://www.linkedin.com/shareArticle?mini=true&url=https://ecomatin.net/grand-dialogue-national-retour-sur-les-moments-forts/&title=Grand%20dialogue%20national%20%3A%20retour%20sur%20les%20moments%20forts) [Tumblr](https://www.tumblr.com/share/link?url=https://ecomatin.net/grand-dialogue-national-retour-sur-les-moments-forts/&name=Grand%20dialogue%20national%20%3A%20retour%20sur%20les%20moments%20forts) [Pinterest](https://pinterest.com/pin/create/button/?url=https://ecomatin.net/grand-dialogue-national-retour-sur-les-moments-forts/&description=Grand%20dialogue%20national%20%3A%20retour%20sur%20les%20moments%20forts&media=https://ecomatin.net/wp-content/uploads/2019/10/ecomatin.net-ceremonies-ouverture-et-fermeture-riches-en-enseignements-grand-dialogue-national-ok.jpeg) [Reddit](https://reddit.com/submit?url=https://ecomatin.net/grand-dialogue-national-retour-sur-les-moments-forts/&title=Grand%20dialogue%20national%20%3A%20retour%20sur%20les%20moments%20forts) [VKontakte](https://vk.com/share.php?url=https://ecomatin.net/grand-dialogue-national-retour-sur-les-moments-forts/) [Odnoklassniki](https://connect.ok.ru/dk?st.cmd=WidgetSharePreview&st.shareUrl=https://ecomatin.net/grand-dialogue-national-retour-sur-les-moments-forts/&description=Grand%20dialogue%20national%20%3A%20retour%20sur%20les%20moments%20forts&media=https://ecomatin.net/wp-content/uploads/2019/10/ecomatin.net-ceremonies-ouverture-et-fermeture-riches-en-enseignements-grand-dialogue-national-ok.jpeg) [Pocket](https://getpocket.com/save?title=Grand%20dialogue%20national%20%3A%20retour%20sur%20les%20moments%20forts&url=https://ecomatin.net/grand-dialogue-national-retour-sur-les-moments-forts/)

Commencé le 30 septembre 2019 sur les hauteurs du Palais des Congrès de Yaoundé, le Grand Dialogue National (**GDN**) convoqué par le président de la République **Paul Biya** pour mettre fin à la crise dans les régions du Nord-ouest et du Sud-ouest, s’est achevé vendredi 4 octobre. Selon les organisateurs, tout semble s’être passé sans anicroche. Sauf que lors de la dernière journée, le programme a connu des égratignures. Annoncée à 11 heures précises, la plénière de clôture a démarré avec trois heures de retard. Selon nos sources, ce retard est dû au fait qu’il existait encore quelques dissonances sur certains points des recommandations faites dans le rapport général.

Au cours de la semaine, les choses n’ont pas toujours été simples dans les commissions. Au sein de celle dédiée à la décentralisation et au développement local, les discussions ont été très houleuses, avec comme point d’achoppement la forme de l’Etat. D’un côté, ceux qui voulaient le retour de nouveau au fédéralisme, majoritairement originaires de la zone anglophone. Et de l’autre côté, ceux qui soutenaient mordicus le maintien de la décentralisation, majoritairement originaires de la zone francophone et surtout membres du Rassemblement démocratique du Cameroun (**RDPC**). La deuxième faction a gagné puisque l’option finalement prise est la **décentralisation**.

Au demeurant, les travaux de ce Grand Dialogue National ne sont pas sortis du cap fixé par le Premier ministre le premier jour. « *En décidant de convier les forces vives du Cameroun à ce Grand dialogue national, le président****Biya****rend chacun de nous entièrement responsable du destin de notre patrie* », avait en effet indiqué **Joseph Dion Ngute**. Avant de souligner que ces assises étaient l’occasion « *d’un sursaut collectif, destiné à trouver des solutions concrètes et pragmatiques, loin des querelles de chapelles, aux problèmes qui nous ont séparés physiquement et intellectuellement ces dernières années*».

Le chef du gouvernement et président du GDN s’est d’ailleurs dit satisfait de la conduite des concertations et de la qualité des recommandations qui ont été faites à l’issue des travaux du Grand Dialogue. Celles-ci seront remises à l’appréciation du président de la République.

**Repentance : le show des ex-combattants sécessionnistes**

Moment sincère de réconciliation ou mise en scène savamment orchestrée par des manipulateurs ? La question a été disputée au sein de l’opinion publique camerounaise durant le Grand Dialogue National (**GDN**), en ce qui concerne la participation d’ex-combattants séparatistes. Au cours de la cérémonie solennelle d’ouverture, une trentaine de jeunes ont été présentés dans la salle 1 500 du Palais des Congrès de Yaoundé comme étant d’anciens membres de groupes armés repentis.

Ces derniers, ont loué la convocation du GDN par le président, et émis le vœu que les r**ecommandations** soient appliquées. Sauf que, sortant du discours qu’on avait préparé pour eux, leur porte-parole a tenu à justifier leur ralliement aux troupes sécessionnistes. D’après lui, leur position radicale découle de la marginalisation et du mépris dont ils ont souvent été victimes de la part des instances gouvernantes et même des populations francophones. Une autre jeune dame a expliqué avoir été trompée par les « ambazoniens » pour embrasser leur cause. Tous, en tout cas, demande pardon pour le mal qu’ils ont causé.

Même rengaine, deux jours plus tard, lorsque cinq anciens généraux des troupes séparatistes ont été présentés à la presse. **General Capture and Destroy, Commandant Pussy, Ezemo Gardien du Temple, Commandant No Mercy** et **Commandant Champion** ont exprimé leurs regrets d’avoir participé à la destruction d’une partie du pays et causé des centaines de morts. *« J’ai tué mes frères et je demande pardon au peuple camerounais car nous sommes un seul et même pays. Nous voulons travailler ensemble dans la****paix****et l’****unité****nationales »*, a déclaré Général « Capture and Destroy ». Le bal des repentis ne s’est pas arrêté à ce niveau, puisque jeudi et vendredi, une vingtaine d’autres se sont adressés au public.

Pour de nombreux camerounais, ces apparitions d’anciens « ambazoniens » n’étaient qu’une mise en scène orchestrée par les pouvoirs publics pour donner l’impression que la défection grandit dans les rangs des sécessionnistes. On note que ces déclarations ont eu des retours contraires aux effets attendus. L’exacerbation est d’autant plus grande que les victimes de cette guerre dans les régions du Nord-ouest et du Sud-ouest sont passées quasiment inaperçues au cours de ce Grand Dialogue National, alors que leur réinsertion était un des sujets centraux des assises.

**Participations : satisfactions, défections et déceptions**

Tout évènement connait généralement des satisfaits et des déçus. Et ce n’est pas le **Grand Dialogue national** qui a échappé à cette règle. Cela s’est ressenti moins de 24 heures après le démarrage des travaux. En effet, au moment de la constitution des commissions, il a été constaté le désistement de **Christopher Fomunyoh**, que l’on avait annoncé comme président de la commission chargée de la reconstruction et du développement des régions touchées par le conflit. Absence qui, du reste, n’a pas surpris beaucoup de participant, connaissant les accointances et lui et les leaders séparatistes basés à l’étranger.

A sa suite, et de manière plus fracassante, on a noté le lendemain le désistement de **Me Akere Muna**, leader du mouvement **NOW**. Selon lui, cette décision découlait de ce qu’il ne souhaitait plus jouer le « figurant ». Il dénonçait le fait que tout ait été mis en place sans consensus ; les personnalités, les commissions et leurs compositions, ainsi que les thématiques ayant été déterminées de manière unilatérale par une des parties prenantes qui est le gouvernement. Ce sont par ailleurs les mêmes griefs portés par **Alice Sadio**, président de l’Alliance des forces Progressistes (**AFP**) qui a elle aussi quitté les lieux.

D’autres ont par contre résolu de revenir en salle, après avoir entrepris de ne plus assister aux travaux. C’est le cas de **Jean jacques Ekindi**, président du Mouvement Progressiste (**MP**) qui a annoncé son désistement dans l’après-midi du mardi, avant de se rebiffer le lendemain. Selon ses explications, il est revenu assister aux travaux après avoir été rassuré par le Premier ministre que ses suggestions seraient prises en compte. Même **volte-face** du côté de **Célestin Bedzigui**, président du Parti de l’Alliance Libérale (**PAL**), au bord de la rupture par ce qu’il estimait que *« Le Grand Dialogue National prescrit par le président****Biya****a été transformé en monologue de****Dion Ngute****».*

L’une des figures que l’on peut également évoquer dans ce lot de déceptions est **Cabral Libii**. Le désormais président du Parti Camerounais pour la Réconciliation Nationale (**PCRN**) s’est dit déçu du déroulement des travaux. Vice-président de la commission en charge du retour des réfugiés et des personnes déplacées, il a qualifié les assises de « sessions du comité central du **RDPC** à une assemblée générale d’émargement aux fins d’obtenir des primes de session ». Il était convaincu que le Grand Dialogue National accoucherait d’une souris.

On ne saurait oublier cette atmosphère dans les coulisses du palais des Congrès qui montrait bien que même dans les rangs du Rassemblement démocratique du Peuple Camerounais (RDPC), une pléthore de personnalités était mécontente du déroulement des assises.

<https://ecomatin.net/grand-dialogue-national-retour-sur-les-moments-forts/>

1. **Un million d’enfants déscolarisés dans les régions du NOSO et de l’Extrême-Nord**

L’avenir économique de ces parties du pays en proie à des crises sécuritaires s’en trouve ainsi sérieusement hypothéqué.

[**EcoMatin**](https://ecomatin.net/author/admin/) [Envoyer un courriel](mailto:ecomatin@yahoo.fr)16 septembre 2020Dernière mise à jour: 14 décembre 2021

[Facebook](https://www.facebook.com/sharer.php?u=https://ecomatin.net/un-million-denfants-descolarises-dans-les-regions-du-noso-et-de-lextreme-nord/) [Twitter](https://twitter.com/intent/tweet?text=Un%20million%20d%E2%80%99enfants%20d%C3%A9scolaris%C3%A9s%20dans%20les%20r%C3%A9gions%20du%20NOSO%20et%20de%20l%E2%80%99Extr%C3%AAme-Nord&url=https://ecomatin.net/un-million-denfants-descolarises-dans-les-regions-du-noso-et-de-lextreme-nord/) [Linkedin](https://www.linkedin.com/shareArticle?mini=true&url=https://ecomatin.net/un-million-denfants-descolarises-dans-les-regions-du-noso-et-de-lextreme-nord/&title=Un%20million%20d%E2%80%99enfants%20d%C3%A9scolaris%C3%A9s%20dans%20les%20r%C3%A9gions%20du%20NOSO%20et%20de%20l%E2%80%99Extr%C3%AAme-Nord) [Tumblr](https://www.tumblr.com/share/link?url=https://ecomatin.net/un-million-denfants-descolarises-dans-les-regions-du-noso-et-de-lextreme-nord/&name=Un%20million%20d%E2%80%99enfants%20d%C3%A9scolaris%C3%A9s%20dans%20les%20r%C3%A9gions%20du%20NOSO%20et%20de%20l%E2%80%99Extr%C3%AAme-Nord) [Pinterest](https://pinterest.com/pin/create/button/?url=https://ecomatin.net/un-million-denfants-descolarises-dans-les-regions-du-noso-et-de-lextreme-nord/&description=Un%20million%20d%E2%80%99enfants%20d%C3%A9scolaris%C3%A9s%20dans%20les%20r%C3%A9gions%20du%20NOSO%20et%20de%20l%E2%80%99Extr%C3%AAme-Nord&media=https://ecomatin.net/wp-content/uploads/2020/09/Bamenda-Ecole.jpg) [Reddit](https://reddit.com/submit?url=https://ecomatin.net/un-million-denfants-descolarises-dans-les-regions-du-noso-et-de-lextreme-nord/&title=Un%20million%20d%E2%80%99enfants%20d%C3%A9scolaris%C3%A9s%20dans%20les%20r%C3%A9gions%20du%20NOSO%20et%20de%20l%E2%80%99Extr%C3%AAme-Nord) [VKontakte](https://vk.com/share.php?url=https://ecomatin.net/un-million-denfants-descolarises-dans-les-regions-du-noso-et-de-lextreme-nord/) [Odnoklassniki](https://connect.ok.ru/dk?st.cmd=WidgetSharePreview&st.shareUrl=https://ecomatin.net/un-million-denfants-descolarises-dans-les-regions-du-noso-et-de-lextreme-nord/&description=Un%20million%20d%E2%80%99enfants%20d%C3%A9scolaris%C3%A9s%20dans%20les%20r%C3%A9gions%20du%20NOSO%20et%20de%20l%E2%80%99Extr%C3%AAme-Nord&media=https://ecomatin.net/wp-content/uploads/2020/09/Bamenda-Ecole.jpg) [Pocket](https://getpocket.com/save?title=Un%20million%20d%E2%80%99enfants%20d%C3%A9scolaris%C3%A9s%20dans%20les%20r%C3%A9gions%20du%20NOSO%20et%20de%20l%E2%80%99Extr%C3%AAme-Nord&url=https://ecomatin.net/un-million-denfants-descolarises-dans-les-regions-du-noso-et-de-lextreme-nord/)

 L’éducation sous embargo

Six années de lutte armée contre l’extrémisme violent ont laissé un million d’enfants non scolarisés dans le Nord-Ouest, le Sud-Ouest et l’Extrême-Nord du Cameroun. Selon l’Ocha, le Bureau de coordination des Nations unies, le phénomène s’étend jusqu’au Littoral, l’Ouest, l’Adamaoua, qui accueillent une forte population déplacées du fait de l’instabilité dans les régions suscitées. Au cours des trois dernières années, au moins 70 écoles ont été détruites et des élèves et des enseignants ont été enlevés dans les deux régions anglophones où des manifestations corporatistes avaient débouché sur une crise politique en 2016.

Des statistiques recensées par l’Onu au courant de l’année scolaires font état de plus de 4 100 écoles primaires et 744 institutions scolaires restées non fonctionnelles. Sur la même période, plus de 850 000 enfants, dont près de 150 000 déplacés, n’allaient plus à l’école.

**Lire aussi**: [Zones économiquement sinistrées : les investisseurs peu enthousiastes un an après](https://ecomatin.net/zones-economiquement-sinistrees-les-investisseurs-peu-enthousiastes-un-an-apres/)

Le Nord-Ouest et le Sud-Ouest du Cameroun, jadis réputés pour la qualité de l’enseignement, répondent depuis le début de la crise dite anglophone à une politique permanente de non-scolarisation. Seuls 29% du personnel enseignant des deux régions y étaient en mesure de travailler. Ces derniers se trouvant principalement dans les principales villes quasi sécurisées. Bamenda, Limbe, Buea, Tiko, Mutenguene, Kumba, Mamfe.

De manière générale, l’emploi est l’une des principales victimes du choc sécuritaire persistant dans les régions anglophones. Seules des estimations entre 8 et 90% des travailleurs de la région ont fui la zone. La situation a contraint le gouvernement à envisager des actions contre les fonctionnaires désertant leurs postes d’affection. Des sanctions allant jusqu’à la suspension des salaires avaient plusieurs fois été annoncées contre des enseignants sans que cela ne les dissuade véritablement de revenir dans le Nord-Ouest et le Sud-Ouest.

**Lire aussi**: [Le Feicom allège de 10% la dette des communes](https://ecomatin.net/le-feicom-allege-de-10-la-dette-des-communes/)

Les incidents ciblant des écoles n’ont cessé de se multiplier entre 2018 et 2019 comme ce fut le cas de l’attaque du collège presbytérien de Nkwen à Bamenda, courant 2018, au cours de laquelle 79 élèves et leurs encadreurs avaient été pris en otage avant d’être libérés 48 heures après. A moins de trois semaines de la rentrée scolaire 2020-2021, le gouvernement reste taiseux sur des mécanismes mis en place pour assurer le retour à l’école dans les régions du Nord-Ouest et du Sud-Ouest.

Le silence du ministère des Enseignements secondaires contraste avec l’attitude adoptée par ce département quelques années pour annoncer la reprise des cours dans certains établissements de l’Extrême-Nord. L’école avait été paralysée dans cette partie du pays à partir de 2014, du fait des exactions de la secte Boko Haram. Quelques 2000 écoles avaient été fermées et un bon nombre détruits par les terroristes dans le Logone et Chari, le Mayo Sava et le Mayo Tsanaga.

<https://ecomatin.net/un-million-denfants-descolarises-dans-les-regions-du-noso-et-de-lextreme-nord/>

[A la Une](https://ecomatin.net/category/a-la-une/)[Conjoncture](https://ecomatin.net/category/conjoncture/)

1. **Deux zones industrielles créées dans le Nord-Ouest et Sud-Ouest pour la relance de l’économie**

Le directeur général de la Mission d’aménagement et de gestion des zones industrielles lance un appel aux opérateurs économiques, pour une meilleure relance de l’activité économique précisément dans les localités de Bamenda et Ombé.

[**EcoMatin**](https://ecomatin.net/author/admin8664/) [Suivre sur Twitter](https://twitter.com/ECOMatin1)[Envoyer un courriel](mailto:articles.ecomatin@gmail.com)31 octobre 2019Dernière mise à jour: 29 novembre 2021

[Facebook](https://www.facebook.com/sharer.php?u=https://ecomatin.net/deux-zones-industrielles-creees-dans-le-nord-ouest-et-sud-ouest-pour-la-relance-de-leconomie/) [Twitter](https://twitter.com/intent/tweet?text=Deux%20zones%20industrielles%20cr%C3%A9%C3%A9es%20dans%20le%20Nord-Ouest%20et%20Sud-Ouest%20pour%20la%20relance%20de%20l%E2%80%99%C3%A9conomie&url=https://ecomatin.net/deux-zones-industrielles-creees-dans-le-nord-ouest-et-sud-ouest-pour-la-relance-de-leconomie/) [Linkedin](https://www.linkedin.com/shareArticle?mini=true&url=https://ecomatin.net/deux-zones-industrielles-creees-dans-le-nord-ouest-et-sud-ouest-pour-la-relance-de-leconomie/&title=Deux%20zones%20industrielles%20cr%C3%A9%C3%A9es%20dans%20le%20Nord-Ouest%20et%20Sud-Ouest%20pour%20la%20relance%20de%20l%E2%80%99%C3%A9conomie) [Tumblr](https://www.tumblr.com/share/link?url=https://ecomatin.net/deux-zones-industrielles-creees-dans-le-nord-ouest-et-sud-ouest-pour-la-relance-de-leconomie/&name=Deux%20zones%20industrielles%20cr%C3%A9%C3%A9es%20dans%20le%20Nord-Ouest%20et%20Sud-Ouest%20pour%20la%20relance%20de%20l%E2%80%99%C3%A9conomie) [Pinterest](https://pinterest.com/pin/create/button/?url=https://ecomatin.net/deux-zones-industrielles-creees-dans-le-nord-ouest-et-sud-ouest-pour-la-relance-de-leconomie/&description=Deux%20zones%20industrielles%20cr%C3%A9%C3%A9es%20dans%20le%20Nord-Ouest%20et%20Sud-Ouest%20pour%20la%20relance%20de%20l%E2%80%99%C3%A9conomie&media=https://ecomatin.net/wp-content/uploads/2019/10/ecomatin.net-deux-zones-industrielles-creees-dans-le-nord-ouest-et-sud-ouest-pour-la-relance-de-leconomie-dg-magzi-1-scaled.jpg) [Reddit](https://reddit.com/submit?url=https://ecomatin.net/deux-zones-industrielles-creees-dans-le-nord-ouest-et-sud-ouest-pour-la-relance-de-leconomie/&title=Deux%20zones%20industrielles%20cr%C3%A9%C3%A9es%20dans%20le%20Nord-Ouest%20et%20Sud-Ouest%20pour%20la%20relance%20de%20l%E2%80%99%C3%A9conomie) [VKontakte](https://vk.com/share.php?url=https://ecomatin.net/deux-zones-industrielles-creees-dans-le-nord-ouest-et-sud-ouest-pour-la-relance-de-leconomie/) [Odnoklassniki](https://connect.ok.ru/dk?st.cmd=WidgetSharePreview&st.shareUrl=https://ecomatin.net/deux-zones-industrielles-creees-dans-le-nord-ouest-et-sud-ouest-pour-la-relance-de-leconomie/&description=Deux%20zones%20industrielles%20cr%C3%A9%C3%A9es%20dans%20le%20Nord-Ouest%20et%20Sud-Ouest%20pour%20la%20relance%20de%20l%E2%80%99%C3%A9conomie&media=https://ecomatin.net/wp-content/uploads/2019/10/ecomatin.net-deux-zones-industrielles-creees-dans-le-nord-ouest-et-sud-ouest-pour-la-relance-de-leconomie-dg-magzi-1-scaled.jpg) [Pocket](https://getpocket.com/save?title=Deux%20zones%20industrielles%20cr%C3%A9%C3%A9es%20dans%20le%20Nord-Ouest%20et%20Sud-Ouest%20pour%20la%20relance%20de%20l%E2%80%99%C3%A9conomie&url=https://ecomatin.net/deux-zones-industrielles-creees-dans-le-nord-ouest-et-sud-ouest-pour-la-relance-de-leconomie/)

Lors du Grand dialogue national organisé du 30 septembre au 4 octobre 2019 à Yaoundé, les organisations patronales se sont inquiétées de la situation économique dans les régions du Nord-ouest et du Sud-ouest.  En début septembre, le ministère de l’Economie indiquait qu’au premier trimestre 2019, le budget d’investissement public (**BIP**) dans ces régions était de **4%** pour le Sud-Ouest et **8%** dans le Nord-Ouest, alors qu’un an plus tôt, ces taux étaient respectivement de **45,6%** et **51,2%.**

Pour pallier le déficit, **Christol George Manon**, directeur général de la Mission d’aménagement et de gestion des zones industrielles (**MAGZI**), informe les opérateurs économiques de la création à **Nkwen** (Bamenda dans le Nord-Ouest), et à **Ombé** dans le Sud-Ouest-Ouest de deux zones industrielles.  *« Ces zones industrielles sont opérationnelles et disposent de toutes les facilités nécessaires à l’implantation des entreprises »*, indique-t-il.

Le DG de la **MAGZI** rappelle que cette initiative s’inscrit en droite ligne des recommandations du Grand dialogue national, et lance un appel à tous les opérateurs à venir investir dans ces zones en y créant des activités génératrices de richesses et d’emplois. Ce qui devrait permettre de limiter les incidences économiques de la question sécuritaire  dans ces régions. On se rappelle une enquête du Groupement inter patronal du Cameroun (**GICAM**) qui révélait que la Cameroon development corporation (**CDC)** a perdu plus d’**1 milliard de FCFA**de biens tandis que **PAMOL** enregistre un manque-à-gagner pour **12 milliards de FCFA**.

Dans la filière Cacao-café, la crise anglophone a fait perdre à l’Etat **56 milliards de FCFA** (20%) de recette d’exportation. Le Sud-ouest et le Nord-ouest étant de grands bassins de production, cette filière subit avec acuité les effets de cette crise sécuritaire. Le Sud-Ouest représente **45%** de la production cacaoyère nationale tandis que le Nord-Ouest est le principal bassin de production du café arabica avec plus de **70%** de la production nationale.

<https://ecomatin.net/deux-zones-industrielles-creees-dans-le-nord-ouest-et-sud-ouest-pour-la-relance-de-leconomie/>

1. **Installation à risques pour 16 sous-préfets des régions anglophones**

Les sous-préfets des arrondissements de Jakiri dans le département du Bui, de Menji dans le Lebialem, de la Menchum, etc. courent le risque de ne pas mener leurs activités sans anicroches du fait de la menace sécuritaire dans ces localités.

[**EcoMatin**](https://ecomatin.net/author/admin8664/) [Suivre sur Twitter](https://twitter.com/ECOMatin1)[Envoyer un courriel](mailto:articles.ecomatin@gmail.com)28 octobre 2019Dernière mise à jour: 26 novembre 2021

L’installation des préfets et sous-préfets nommés par décret présidentiel du 7 octobre 2019 se poursuit dans différentes circonscriptions administratives. Les prises de fonction ne se déroulent cependant pas de la même manière. A en croire certains sites d’informations, la menace plane dans les régions du Nord-ouest-et du Sud-ouest.

L’on apprend ainsi que 16 sous-préfets de ces régions tardent à prendre fonctions.  Au Nord-ouest par exemple sont concernés **Andrew Monoke Epule,** nommé sous-préfet de l’arrondissement de Jakiri. Dans le département de la Menchum, **Christian Azise Fomlah Foncha** est attendu pour servir l’arrondissement de la Menchum-Valley. Dans le Sud-ouest, **Eselakwe Emile Atehmbapang**, administrateur civil devra occuper ses fonctions de sous-préfet dans l’arrondissement de Menji.

Pourtant en tant qu’anciens élèves de l’Ecole normale d’administration et de magistrature (**ENAM**), ils sont astreints à être déployés dans toutes zones comme le veut le décret n° 78/CE/2019/007  qui stipule que *« tous les diplômés de l’ENAM doivent être prêts à être déployés dans toute zone et à tout moment »*. Ce qui n’est plus très aisé. Depuis le début de la crise sécuritaire dans ces régions, les autorités administratives sont ciblées par les attaques et les enlèvements. En novembre 2018, le sous-préfet de l’arrondissement de Noni situé dans la région du Nord-Ouest, département de Bui, avait été enlevé par un groupe armé du mouvement séparatiste anglophone.

Le 11 février 2018, celui de Batibo avait été enlevé et quelques jours après, un autre rapt avait été lancé à l’endroit du délégué régional des affaires sociales pour le Nord-ouest. Jusqu’à ce jour leurs familles respectives sont sans leurs nouvelles.

<https://ecomatin.net/installation-a-risques-pour-16-sous-prefets-des-regions-anglophones/>

1. **Déclaration : 5 généraux sécessionnistes implorent le retour de la paix dans le Nord-ouest et le Sud-ouest**

Lors d’un point de presse mercredi, un d’eux a souhaité que les travaux du Palais des Congrès aboutissent à des décisions pouvant mettre fin à la crise qui sévit depuis trois ans dans ces régions du Cameroun.

[**EcoMatin**](https://ecomatin.net/author/admin8664/) [Suivre sur Twitter](https://twitter.com/ECOMatin1)[Envoyer un courriel](mailto:articles.ecomatin@gmail.com)3 octobre 2019Dernière mise à jour: 23 novembre 2021

[Facebook](https://www.facebook.com/sharer.php?u=https://ecomatin.net/declaration-5-generaux-secessionnistes-implorent-le-retour-de-la-paix-dans-le-nord-ouest-et-le-sud-ouest/) [Twitter](https://twitter.com/intent/tweet?text=D%C3%A9claration%20%3A%205%20g%C3%A9n%C3%A9raux%20s%C3%A9cessionnistes%20implorent%20le%20retour%20de%20la%20paix%20dans%20le%20Nord-ouest%20et%20le%20Sud-ouest&url=https://ecomatin.net/declaration-5-generaux-secessionnistes-implorent-le-retour-de-la-paix-dans-le-nord-ouest-et-le-sud-ouest/) [Linkedin](https://www.linkedin.com/shareArticle?mini=true&url=https://ecomatin.net/declaration-5-generaux-secessionnistes-implorent-le-retour-de-la-paix-dans-le-nord-ouest-et-le-sud-ouest/&title=D%C3%A9claration%20%3A%205%20g%C3%A9n%C3%A9raux%20s%C3%A9cessionnistes%20implorent%20le%20retour%20de%20la%20paix%20dans%20le%20Nord-ouest%20et%20le%20Sud-ouest) [Tumblr](https://www.tumblr.com/share/link?url=https://ecomatin.net/declaration-5-generaux-secessionnistes-implorent-le-retour-de-la-paix-dans-le-nord-ouest-et-le-sud-ouest/&name=D%C3%A9claration%20%3A%205%20g%C3%A9n%C3%A9raux%20s%C3%A9cessionnistes%20implorent%20le%20retour%20de%20la%20paix%20dans%20le%20Nord-ouest%20et%20le%20Sud-ouest) [Pinterest](https://pinterest.com/pin/create/button/?url=https://ecomatin.net/declaration-5-generaux-secessionnistes-implorent-le-retour-de-la-paix-dans-le-nord-ouest-et-le-sud-ouest/&description=D%C3%A9claration%20%3A%205%20g%C3%A9n%C3%A9raux%20s%C3%A9cessionnistes%20implorent%20le%20retour%20de%20la%20paix%20dans%20le%20Nord-ouest%20et%20le%20Sud-ouest&media=https://ecomatin.net/wp-content/uploads/2019/10/ecomatin.net-declaration-5-generaux-secessionnistes-implorent-le-retour-de-la-paix-dans-le-nord-ouest-et-le-sud-ouest-general-capture-and-destroy.jpg) [Reddit](https://reddit.com/submit?url=https://ecomatin.net/declaration-5-generaux-secessionnistes-implorent-le-retour-de-la-paix-dans-le-nord-ouest-et-le-sud-ouest/&title=D%C3%A9claration%20%3A%205%20g%C3%A9n%C3%A9raux%20s%C3%A9cessionnistes%20implorent%20le%20retour%20de%20la%20paix%20dans%20le%20Nord-ouest%20et%20le%20Sud-ouest) [VKontakte](https://vk.com/share.php?url=https://ecomatin.net/declaration-5-generaux-secessionnistes-implorent-le-retour-de-la-paix-dans-le-nord-ouest-et-le-sud-ouest/) [Odnoklassniki](https://connect.ok.ru/dk?st.cmd=WidgetSharePreview&st.shareUrl=https://ecomatin.net/declaration-5-generaux-secessionnistes-implorent-le-retour-de-la-paix-dans-le-nord-ouest-et-le-sud-ouest/&description=D%C3%A9claration%20%3A%205%20g%C3%A9n%C3%A9raux%20s%C3%A9cessionnistes%20implorent%20le%20retour%20de%20la%20paix%20dans%20le%20Nord-ouest%20et%20le%20Sud-ouest&media=https://ecomatin.net/wp-content/uploads/2019/10/ecomatin.net-declaration-5-generaux-secessionnistes-implorent-le-retour-de-la-paix-dans-le-nord-ouest-et-le-sud-ouest-general-capture-and-destroy.jpg) [Pocket](https://getpocket.com/save?title=D%C3%A9claration%20%3A%205%20g%C3%A9n%C3%A9raux%20s%C3%A9cessionnistes%20implorent%20le%20retour%20de%20la%20paix%20dans%20le%20Nord-ouest%20et%20le%20Sud-ouest&url=https://ecomatin.net/declaration-5-generaux-secessionnistes-implorent-le-retour-de-la-paix-dans-le-nord-ouest-et-le-sud-ouest/)

Ils portent des noms de guerre. **General « Capture and Destroy »**, **Commandant « Pussy »**, **Ezemo *« Gardien du temple »***, **Commandant*« No Mercy »*** et **Commandant *« Champion »*** sont cinq anciens chefs de gangs ayant conduit des « troupes » sécessionnistes dans la crise au Nord-ouest et au Sud-ouest. Ils ont été présentés mercredi 2 octobre 2019 à la presse, en marge des travaux du Grand Dialogue National (**GDN**) qui se tient depuis le 30 septembre au palais des Congrès de Yaoundé.

D’après le porte-parole du GDN, ces anciens combattants séparatistes ont décidé de rejoindre la trentaine d’autres ex-combattants repentis, qui avaient été présentés à l’ouverture solennelle des assises présidées par le **Premier ministre, Joseph Dion Ngute**. *« Cinq nouveaux membres de groupes armés sécessionnistes ont répondu favorablement à l’offre de paix du chef de l’État de déposer les armes. Ils viennent de nous rejoindre et sont ici parmi nous pour prendre part au Grand Dialogue National »*, a déclaré **George Ewane**, pour les introduire.

Prenant la parole au nom de tout le groupe, **General *« Capture and Destroy »*** a demandé la paix tout en regrettant leur implication dans cette crise qui a déjà fait plus de 3 000 morts et des centaines de milliers de déplacés et réfugiés, selon les organisations des droits de l’homme. *« Oui j’ai tué mes frères et je demande pardon au peuple camerounais car nous sommes un seul et même pays. Nous voulons travailler ensemble dans la paix et l’unité nationale. Les ‘‘ambazoniens’’ ne veulent pas la paix, je l’ai compris (…) Je demande au chef de l’Etat de nous écouter et d’aider les communautés de ces régions pour le retour à la paix et au dialogue. Nous souhaitons que les enfants reprennent le chemin de l’école et demandons l’amnistie entre les francophones et les anglophones »*, a clamé celui qui contrôlait des troupes armées dans le département du Fako, dont la principale ville est Limbe (Sud-Ouest).

L’ancien milicien s’est également adressé au président de la République, **Paul Biya**. *« Nous avons décidé de déposer les armes parce que nous pensons qu’il est temps de participer à la construction de notre pays et de regarder vers l’avenir »*, a-t-il déclaré. Avant de solliciter la libération des prisonniers de la cause anglophone, l’amnistie générale et le vote des gouverneurs par les populations, entre autres doléances.

Les anciens *« généraux »* ont par la suite rencontré le Premier ministre durant une trentaine de minutes. Les échanges ont principalement porté sur les modalités de leur contribution pour le retour à la paix qu’ils prônent désormais et l’arrêt d’effusion de sang. « Je suis toujours un général par intérim issu de la révolution populaire. Je suis prêt et disposé à apporter la paix. Je vais embrasser quiconque est prêt à travailler avec moi. Mais ceux qui sont contre la paix devraient en être conscients car la nature les combattra », a déclaré General *« Capture and Destroy »,* au sortir de cette audience.

<https://ecomatin.net/declaration-5-generaux-secessionnistes-implorent-le-retour-de-la-paix-dans-le-nord-ouest-et-le-sud-ouest/>

1. **Investissements : forte baisse de l’exécution du BIP en zone anglophone**

Les taux d’exécution du Budget d’investissement public sont respectivement de 4% au Sud-ouest et de 8% au Nord-ouest au premier semestre 2019.

[**EcoMatin**](https://ecomatin.net/author/admin8664/) [Suivre sur Twitter](https://twitter.com/ECOMatin1)[Envoyer un courriel](mailto:articles.ecomatin@gmail.com)12 septembre 2019Dernière mise à jour: 23 novembre 2021

À cause de la crise anglophone, les taux d’exécution du **Budget d’investissement public (BIP)** sont en mauvaise posture dans le Sud-ouest (SO) et le Nord-ouest (NO). Au premier semestre 2019, ces taux sont de **4%** pour le SO et **8%** pour le NO. Cela signifie que près 90% des projets inscrits dans le budget d’investissement public de ces régions n’ont pas été réalisés.

*Dans le Nord-Ouest, l’exécution du bip était de 86,46 en 2016, contre 83% en 2017 et enfin, 51,2% en 2018.*

Pourtant, le taux d’exécution du BIP dans le SO était de **79,9%** en 2016, de **65%** en 2017 et de **46,5%** en 2018. Cette région avait bénéficié de **426 projets** pour l’année budgétaire 2018 avec une enveloppe d’environ **6,98 milliards de F**, contre 557 en 2019 pour **9,71 milliards FCFA**. Dans le Nord-Ouest, l’exécution du bip était de **86,46** en 2016, contre **83%** en 2017 et enfin, **51,2%** en 2018. Avec **492 projets** d’une enveloppe de **7,31 milliards de F** en 2018, contre **541 projet**s évalués à **8,89 millions de F** en 2019. Ces faibles performances sont dues aux problèmes de sécurité persistants dans les deux régions.

Toutefois, les pouvoirs publics disent avoir pris plusieurs mesures pour tenter de renverser la courbe d’ici la fin du second semestre 2019. « *Pour atteindre en fin d’année un taux d’exécution du BIP satisfaisant dans ces régions, des dispositions ont été prises pour que les marchés soient contractualisés sous forme de gré à gré. En clair, il n’y aura pas d’appel à la concurrence pour ce type de marché. Les prestataires voulant réaliser des marchés publics dans ces régions n’auront que des avis favorables* », révèle **Isaac Tamba,** directeur général de l’Economie et de la Programmation des investissements au ministre en charge de l’Economie (Minepat). L’on évoque également le respect scrupuleux de l’exécution de la commande publique, la mise à la disposition d’un appui supplémentaire pour renforcer les capacités financières des Petites et moyennes entreprises (PME) chargées des travaux.

Toujours pour essayer de redonner un nouveau souffle économique au NO/SO, l’Etat a décrété, lundi 02 septembre 2019, ces deux territoires comme « *zones économiquement sinistrées* ». L’objectif est de créer des mesures favorables pour l’installation d’entreprises. Celles qui s’y installeront bénéficieront d’exonération de taxes d’impôts pendant une période de trois ans.

Depuis fin 2016, les régions du NO/SO se sont quant à elles embrasées, suite à des revendications corporatistes des avocats et enseignants anglophones. Ces mouvements d’humeur ont ensuite dégénéré en revendications indépendantistes à partir de 2017, transformant ces deux régions anglophones du Cameroun en théâtre d’affrontements entre l’armée régulière et les militants séparatistes.

<https://ecomatin.net/investissements-forte-baisse-de-lexecution-du-bip-en-zone-anglophone/>

1. **Crise sécuritaire : malgré les tensions, l’État veut attirer les investisseurs dans les régions sinistrées**

En déclarant les régions anglophones et celle de l’extrême Nord comme « zones économiques sinistrées », le gouvernement camerounais à travers un décret du Premier ministre propose des exonérations fiscales aux entrepreneurs voulant développer des affaires dans ces localités.

[**EcoMatin**](https://ecomatin.net/author/admin8664/) [Suivre sur Twitter](https://twitter.com/ECOMatin1)[Envoyer un courriel](mailto:articles.ecomatin@gmail.com)3 septembre 2019Dernière mise à jour: 23 novembre 2021

[Facebook](https://www.facebook.com/sharer.php?u=https://ecomatin.net/cirse-securitaire-malgre-les-tensions-letat-veut-attirer-les-investisseurs-dans-les-regions-sinistrees/) [Twitter](https://twitter.com/intent/tweet?text=Crise%20s%C3%A9curitaire%20%3A%20malgr%C3%A9%20les%20tensions%2C%20l%E2%80%99%C3%89tat%20veut%20attirer%20les%20investisseurs%20dans%20les%20r%C3%A9gions%20sinistr%C3%A9es&url=https://ecomatin.net/cirse-securitaire-malgre-les-tensions-letat-veut-attirer-les-investisseurs-dans-les-regions-sinistrees/) [Linkedin](https://www.linkedin.com/shareArticle?mini=true&url=https://ecomatin.net/cirse-securitaire-malgre-les-tensions-letat-veut-attirer-les-investisseurs-dans-les-regions-sinistrees/&title=Crise%20s%C3%A9curitaire%20%3A%20malgr%C3%A9%20les%20tensions%2C%20l%E2%80%99%C3%89tat%20veut%20attirer%20les%20investisseurs%20dans%20les%20r%C3%A9gions%20sinistr%C3%A9es) [Tumblr](https://www.tumblr.com/share/link?url=https://ecomatin.net/cirse-securitaire-malgre-les-tensions-letat-veut-attirer-les-investisseurs-dans-les-regions-sinistrees/&name=Crise%20s%C3%A9curitaire%20%3A%20malgr%C3%A9%20les%20tensions%2C%20l%E2%80%99%C3%89tat%20veut%20attirer%20les%20investisseurs%20dans%20les%20r%C3%A9gions%20sinistr%C3%A9es) [Pinterest](https://pinterest.com/pin/create/button/?url=https://ecomatin.net/cirse-securitaire-malgre-les-tensions-letat-veut-attirer-les-investisseurs-dans-les-regions-sinistrees/&description=Crise%20s%C3%A9curitaire%20%3A%20malgr%C3%A9%20les%20tensions%2C%20l%E2%80%99%C3%89tat%20veut%20attirer%20les%20investisseurs%20dans%20les%20r%C3%A9gions%20sinistr%C3%A9es&media=https://ecomatin.net/wp-content/uploads/2019/09/ecomatin.net-cirse-securitaire-malgre-les-tensions-letat-veut-attirer-les-investisseurs-dans-les-regions-sinistrees-crise-securitaire.jpg) [Reddit](https://reddit.com/submit?url=https://ecomatin.net/cirse-securitaire-malgre-les-tensions-letat-veut-attirer-les-investisseurs-dans-les-regions-sinistrees/&title=Crise%20s%C3%A9curitaire%20%3A%20malgr%C3%A9%20les%20tensions%2C%20l%E2%80%99%C3%89tat%20veut%20attirer%20les%20investisseurs%20dans%20les%20r%C3%A9gions%20sinistr%C3%A9es) [VKontakte](https://vk.com/share.php?url=https://ecomatin.net/cirse-securitaire-malgre-les-tensions-letat-veut-attirer-les-investisseurs-dans-les-regions-sinistrees/) [Odnoklassniki](https://connect.ok.ru/dk?st.cmd=WidgetSharePreview&st.shareUrl=https://ecomatin.net/cirse-securitaire-malgre-les-tensions-letat-veut-attirer-les-investisseurs-dans-les-regions-sinistrees/&description=Crise%20s%C3%A9curitaire%20%3A%20malgr%C3%A9%20les%20tensions%2C%20l%E2%80%99%C3%89tat%20veut%20attirer%20les%20investisseurs%20dans%20les%20r%C3%A9gions%20sinistr%C3%A9es&media=https://ecomatin.net/wp-content/uploads/2019/09/ecomatin.net-cirse-securitaire-malgre-les-tensions-letat-veut-attirer-les-investisseurs-dans-les-regions-sinistrees-crise-securitaire.jpg) [Pocket](https://getpocket.com/save?title=Crise%20s%C3%A9curitaire%20%3A%20malgr%C3%A9%20les%20tensions%2C%20l%E2%80%99%C3%89tat%20veut%20attirer%20les%20investisseurs%20dans%20les%20r%C3%A9gions%20sinistr%C3%A9es&url=https://ecomatin.net/cirse-securitaire-malgre-les-tensions-letat-veut-attirer-les-investisseurs-dans-les-regions-sinistrees/)

Les régions camerounaises du Nord-Ouest, du Sud-Ouest (NO**/SO**), et de l’Extrême-Nord ont été déclarées lundi 02 septembre *2019 « zones économiquement sinistrées »,* selon un décret signé par le Premier ministre **Joseph Dion Ngute.** Ce texte vise à créer des mesures favorables pour l’installation d’entreprises dans ces zones touchées par l’insécurité. Celles qui s’y installeront bénéficieront d’exonération de taxes et d’impôts pendant une période de trois ans.  Les dispositions du gouvernement sur les *« zones économiques sinistrées »* se rajoutent ainsi  à la loi portant incitations à l’investissement privé en République du Cameroun. Ce texte de 2013, qui a été révisé en 2017, accorde aux investisseurs des exonérations fiscalo-douanières sur une période allant de 5 à 10 ans.

Les deux régions anglophones sont plongées dans une crise sécessionniste depuis 2017. Dans ces deux localités où vit **20%** de la population camerounaise, le cacao et le café sont les deux produits phares: **45%** du cacao produit au Cameroun l’est au Sud-Ouest, et**75%**du café arabica camerounais vient du Nord-Ouest, selon le patronat camerounais, le **Gicam**. Mais, dans un rapport diffusé mi-septembre, le **Gicam**estime que les recettes d’exportation de ces deux denrées ont chuté de **20%** à cause du conflit. La production de cacao et de café pâtit de *« l’insécurité et des déplacements de populations (qui) sont préjudiciables aux activités agricoles et à l’entretien des plantations ».*

Quant à l’Extrême-Nord, le groupe terroriste **Boko** **Haram** y est actif depuis 2014. Dans cette partie du pays, l’impact économique est différent. Au contraire des régions anglophones dynamiques et historiquement créatrices d’emploi, l’Extrême-Nord se caractérise par un retard de développement significatif. Néanmoins face à cette guerre, les 04 millions de populations de l’Extrême-Nord ont démontré une grande capacité d’adaptation et de résilience, offrant au gouvernement camerounais et aux partenaires internationaux la possibilité de mettre en place des politiques de développement intégrant la diversité et la fluidité des traditions économiques de cette région frontalière entre le Nigéria et le Tchad.

L’Extrême-Nord du Cameroun est un véritable carrefour de routes commerciales et de cultures. En plus du commerce, son économie est structurée autour de l’agriculture, de l’élevage, de la pêche, du tourisme, du transport de marchandises, de l’artisanat et de la chasse. Le secteur informel est prépondérant et les activités de contrebande occupent une place considérable. L’économie locale est dominée par des riches commerçants et des chefs traditionnels, souvent membres du parti au pouvoir, et qui occupent des postes élevés au sein de l’administration.

<https://ecomatin.net/cirse-securitaire-malgre-les-tensions-letat-veut-attirer-les-investisseurs-dans-les-regions-sinistrees/>

1. **Crise : l’aide humanitaire couvre moins de 20% des besoins au Cameroun**

Selon le Conseil norvégien pour les réfugiés, la crise dans le pays est l’une des plus sous-financées dans le monde.

[**EcoMatin**](https://ecomatin.net/author/admin8664/) [Suivre sur Twitter](https://twitter.com/ECOMatin1)[Envoyer un courriel](mailto:articles.ecomatin@gmail.com)19 juillet 2019Dernière mise à jour: 19 novembre 2021

*« Le manque actuel de financement est alarmant. Malgré des besoins croissants, les fonds alloués à l’action humanitaire sont très inferieurs par rapport à la même période de l’année dernière. Nous sommes profondément préoccupés par les personnes* qui subissent déjà les lourdes conséquences de ce manque de ressources», s’alarme, dans un communiqué publié lundi dernier, le secrétaire général du Conseil norvégien pour les réfugiés, **Jan Egeland**. Cette Organisation non gouvernementale (Ong) internationale qui travaille spécifiquement avec les réfugiés, les populations déplacées contre leur gré et les communautés gravement touchées par le déplacement, révèle qu’au Cameroun, la crise humanitaire est l’une des plus sous-financées avec moins de 20% des fonds nécessaires couverts à ce jour. L’équipe humanitaire pays, dans un rapport publié en février 2019, a estimé à **4,3 millions,** le nombre de personnes dans le besoin. Celles-ci sont réparties sur 8 des 10 régions du Cameroun. Selon le même document, « *le nombre total d’enfants dans le besoin dans les différentes zones affectées par les conflits, s’élève à plus d’un million avec****343 000 enfants****déplacés,****61 000 réfugiés, 59 000 retournés et 544 000****dans les communautés hôtes* ».

**26 milliards de dollars** américains, soit environ **15 199 milliards Fcfa**, sont nécessaires pour venir en aide à environ **94 millions** de personnes dans le besoin. Jusqu’à présent, les pays donateurs ont fourni environ **7 milliards de dollars**, soit 27% de l’argent nécessaire, selon la plateforme de suivi financier de l’Organisation des Nations unies (**Onu**). Cela représente environ **2 milliards** de dollars de moins qu’à la même période l’année dernière lorsque **35%** des plans de réponses humanitaires étaient financés. Il est à noter qu’au plan interne, le gouvernement camerounais et les Ong ne s’accordent pas toujours sur le nombre de personnes impactées par les crises que traverse le pays.

Dans le Nord-Ouest et le Sud-Ouest, le ministre de l’Administration territoriale, **Paul Atanga Nji**, a accusé récemment les organisations humanitaires de gonfler les chiffres des déplacés internes pour capter plus de financements. « *Les ennemis de la nation voudront donner l’impression qu’avec****400.000****ou****500.000 déplacés****internes, le gouvernement serait incapable de gérer cette situation. Et ils vont appeler à des interventions (…) estimant que nous n’arrivons pas à encadrer. Voilà le danger, c’est-à-dire, piétiner la souveraineté du Cameroun à travers de faux rapports. Le gouvernement ne peut pas l’accepter (…) Vous pouvez, par exemple, demander****50 millions d’euros****, tout en sachant que pour encadrer les déplacés internes au Cameroun, il faudrait seulement****10 millions d’euros****. Vous constaterez que les autres****40 millions d’euros****prendront une autre destination*  », a-t-il dénoncé lors d’une conférence de presse.

Il est à rappeler que, pour la crise anglophone, le gouvernement met en œuvre depuis 2018, un plan d’assistance humanitaire d’urgence qui prévoit, entre autres, la reconstruction des biens détruits. Doté d’un budget de **12,5 milliards Fcfa**, celui-ci tarde à présenter des résultats.

<https://ecomatin.net/cameroun-laide-humanitaire-couvre-moins-de-20-des-besoins/>

1. **L’ONU prévoit une hausse en besoin humanitaire au Cameroun en 2019**

Le nombre de personnes qui auront besoin d’une aide humanitaire au pays au cours de cette année s’élèvera à environ 4,3 millions, soit une augmentation de 30 % par rapport à 2018.

[**EcoMatin**](https://ecomatin.net/author/admin8664/) [Suivre sur Twitter](https://twitter.com/ECOMatin1)[Envoyer un courriel](mailto:articles.ecomatin@gmail.com)16 juin 2019Dernière mise à jour: 18 novembre 2021

[Facebook](https://www.facebook.com/sharer.php?u=https://ecomatin.net/securite-au-cameroun-lonu-prevoit-une-hausse-en-besoin-humanitaire-en-2019/) [Twitter](https://twitter.com/intent/tweet?text=L%E2%80%99ONU%20pr%C3%A9voit%20une%20hausse%20en%20besoin%20humanitaire%20au%20Cameroun%20en%202019&url=https://ecomatin.net/securite-au-cameroun-lonu-prevoit-une-hausse-en-besoin-humanitaire-en-2019/) [Linkedin](https://www.linkedin.com/shareArticle?mini=true&url=https://ecomatin.net/securite-au-cameroun-lonu-prevoit-une-hausse-en-besoin-humanitaire-en-2019/&title=L%E2%80%99ONU%20pr%C3%A9voit%20une%20hausse%20en%20besoin%20humanitaire%20au%20Cameroun%20en%202019) [Tumblr](https://www.tumblr.com/share/link?url=https://ecomatin.net/securite-au-cameroun-lonu-prevoit-une-hausse-en-besoin-humanitaire-en-2019/&name=L%E2%80%99ONU%20pr%C3%A9voit%20une%20hausse%20en%20besoin%20humanitaire%20au%20Cameroun%20en%202019) [Pinterest](https://pinterest.com/pin/create/button/?url=https://ecomatin.net/securite-au-cameroun-lonu-prevoit-une-hausse-en-besoin-humanitaire-en-2019/&description=L%E2%80%99ONU%20pr%C3%A9voit%20une%20hausse%20en%20besoin%20humanitaire%20au%20Cameroun%20en%202019&media=https://ecomatin.net/wp-content/uploads/2019/06/ecomatin.net-securite-au-cameroun-lonu-prevoit-une-hausse-en-besoin-humanitaire-en-2019-humanitaire.jpg) [Reddit](https://reddit.com/submit?url=https://ecomatin.net/securite-au-cameroun-lonu-prevoit-une-hausse-en-besoin-humanitaire-en-2019/&title=L%E2%80%99ONU%20pr%C3%A9voit%20une%20hausse%20en%20besoin%20humanitaire%20au%20Cameroun%20en%202019) [VKontakte](https://vk.com/share.php?url=https://ecomatin.net/securite-au-cameroun-lonu-prevoit-une-hausse-en-besoin-humanitaire-en-2019/) [Odnoklassniki](https://connect.ok.ru/dk?st.cmd=WidgetSharePreview&st.shareUrl=https://ecomatin.net/securite-au-cameroun-lonu-prevoit-une-hausse-en-besoin-humanitaire-en-2019/&description=L%E2%80%99ONU%20pr%C3%A9voit%20une%20hausse%20en%20besoin%20humanitaire%20au%20Cameroun%20en%202019&media=https://ecomatin.net/wp-content/uploads/2019/06/ecomatin.net-securite-au-cameroun-lonu-prevoit-une-hausse-en-besoin-humanitaire-en-2019-humanitaire.jpg) [Pocket](https://getpocket.com/save?title=L%E2%80%99ONU%20pr%C3%A9voit%20une%20hausse%20en%20besoin%20humanitaire%20au%20Cameroun%20en%202019&url=https://ecomatin.net/securite-au-cameroun-lonu-prevoit-une-hausse-en-besoin-humanitaire-en-2019/)

Dans son récent rapport publié fin mai, le Bureau régional des Nations unies pour l’Afrique centrale (**Unoca**) observe qu’au Cameroun, les besoins humanitaires ont fortement augmenté au premier trimestre de 2019.

² **278 884 réfugiés** de la République centrafricaine dans la région de l’Est. « *Outre les conséquences de la crise du bassin du lac Tchad dans la région de l’Extrême-Nord, plus de****1,3 million de personnes****avaient besoin d’une aide humanitaire dans les régions du Nord-Ouest et du Sud-Ouest en raison de la persistance des violences* », affirme l’Unoca.

Toujours en avril 2019, indique **l’Unoca**, plus de **530 000 personnes** ont été déplacées dans les deux régions anglophones du Cameroun et dans les régions du Littoral et de l’Ouest, et **35 858** **personnes** ont cherché asile au Nigéria. *« Les fermetures d’écoles, les nombreux enlèvements d’élèves et d’enseignants, les restrictions à la liberté de circulation et les cas de violence sexuelle et fondée sur le genre ont contribué à instaurer un climat de peur et d’intimidation. Ce qui a eu des répercussions préjudiciables à l’économie locale et à l’accès aux services sociaux de base et augmenté considérablement les risques en matière de protection »,* déplore Bureau régional des Nations unies pour l’Afrique centrale.

Dans la prospective, l’organisme onusien prévoit que le nombre de personnes qui auront besoin d’une aide humanitaire au Cameroun en 2019 s’élèvera à environ **4,3 millions**, soit une augmentation de **30 %** par rapport à 2018.

<https://ecomatin.net/securite-au-cameroun-lonu-prevoit-une-hausse-en-besoin-humanitaire-en-2019/>

1. **Cryptomonnaie : Afrique du sud comme base arrière de la monnaie virtuelle des Ambazoniens**

Après la Scbc, la télévision des séparatistes camerounais, émettant depuis ce pays, c'est depuis ce même territoire que des leaders séparatistes viennent de lancer "l'Ambacoin", leur monnaie virtuelle calquée sur le " Bitcoin". Lancement suivi d'une opération de collecte de fonds pour la cause sécessionniste anglophone.

[**EcoMatin**](https://ecomatin.net/author/admin8664/) [Suivre sur Twitter](https://twitter.com/ECOMatin1)[Envoyer un courriel](mailto:articles.ecomatin@gmail.com)6 janvier 2019Dernière mise à jour: 11 novembre 2021

[Facebook](https://www.facebook.com/sharer.php?u=https://ecomatin.net/cryptomonnaie-afrique-du-sud-comme-base-arriere-de-la-monnaie-virtuelle-des-ambazoniens/) [Twitter](https://twitter.com/intent/tweet?text=Cryptomonnaie%20%3A%20Afrique%20du%20sud%20comme%20base%20arri%C3%A8re%20de%20la%20monnaie%20virtuelle%20des%20Ambazoniens&url=https://ecomatin.net/cryptomonnaie-afrique-du-sud-comme-base-arriere-de-la-monnaie-virtuelle-des-ambazoniens/) [Linkedin](https://www.linkedin.com/shareArticle?mini=true&url=https://ecomatin.net/cryptomonnaie-afrique-du-sud-comme-base-arriere-de-la-monnaie-virtuelle-des-ambazoniens/&title=Cryptomonnaie%20%3A%20Afrique%20du%20sud%20comme%20base%20arri%C3%A8re%20de%20la%20monnaie%20virtuelle%20des%20Ambazoniens) [Tumblr](https://www.tumblr.com/share/link?url=https://ecomatin.net/cryptomonnaie-afrique-du-sud-comme-base-arriere-de-la-monnaie-virtuelle-des-ambazoniens/&name=Cryptomonnaie%20%3A%20Afrique%20du%20sud%20comme%20base%20arri%C3%A8re%20de%20la%20monnaie%20virtuelle%20des%20Ambazoniens) [Pinterest](https://pinterest.com/pin/create/button/?url=https://ecomatin.net/cryptomonnaie-afrique-du-sud-comme-base-arriere-de-la-monnaie-virtuelle-des-ambazoniens/&description=Cryptomonnaie%20%3A%20Afrique%20du%20sud%20comme%20base%20arri%C3%A8re%20de%20la%20monnaie%20virtuelle%20des%20Ambazoniens&media=https://ecomatin.net/wp-content/uploads/2019/01/ecomatin.net-cryptomonnaie-afrique-du-sud-comme-base-arriere-de-la-monnaie-virtuelle-des-ambazoniens-ambazonie.jpg) [Reddit](https://reddit.com/submit?url=https://ecomatin.net/cryptomonnaie-afrique-du-sud-comme-base-arriere-de-la-monnaie-virtuelle-des-ambazoniens/&title=Cryptomonnaie%20%3A%20Afrique%20du%20sud%20comme%20base%20arri%C3%A8re%20de%20la%20monnaie%20virtuelle%20des%20Ambazoniens) [VKontakte](https://vk.com/share.php?url=https://ecomatin.net/cryptomonnaie-afrique-du-sud-comme-base-arriere-de-la-monnaie-virtuelle-des-ambazoniens/) [Odnoklassniki](https://connect.ok.ru/dk?st.cmd=WidgetSharePreview&st.shareUrl=https://ecomatin.net/cryptomonnaie-afrique-du-sud-comme-base-arriere-de-la-monnaie-virtuelle-des-ambazoniens/&description=Cryptomonnaie%20%3A%20Afrique%20du%20sud%20comme%20base%20arri%C3%A8re%20de%20la%20monnaie%20virtuelle%20des%20Ambazoniens&media=https://ecomatin.net/wp-content/uploads/2019/01/ecomatin.net-cryptomonnaie-afrique-du-sud-comme-base-arriere-de-la-monnaie-virtuelle-des-ambazoniens-ambazonie.jpg) [Pocket](https://getpocket.com/save?title=Cryptomonnaie%20%3A%20Afrique%20du%20sud%20comme%20base%20arri%C3%A8re%20de%20la%20monnaie%20virtuelle%20des%20Ambazoniens&url=https://ecomatin.net/cryptomonnaie-afrique-du-sud-comme-base-arriere-de-la-monnaie-virtuelle-des-ambazoniens/)

C’est le 24 décembre 2018 dernier que « l’Ambacoin », cryptomonnaie de la république fictive d’Ambazonie, a été de officiellement créée. Les séparatistes anglophones du Sud et du Nord-ouest Cameroun, rejoignent ainsi le cercle des utilisateurs de cette monnaie virtuelle calquée sur le  » Bitcoin », définie comme étant une monnaie binaire indépendante du système et circuit monétaire classique ou conventionnel.

D’après une récente enquête, les sécessionnistes camerounais envisagent, à travers cette opération, financer leur entreprise guerrière contre l’Etat du Cameroun. La même enquête révèle d’ailleurs que l’achat de ‘’l’Ambacoin » est désormais ouvert par, internet, à tout soutien à la cause séparatiste. Ce, depuis ce  28 décembre 2018. Un peu d’un mois seulement après la création par le Président **Paul Biya**, d’un Comité national  de désarmement, démobilisation et de réintégration (**Cnddr**) des combattants de la secte intégriste **Boko haram** et ceux des groupes armés des Régions anglophones. Preuve de la détermination des têtes pensantes de l’Ambazonie à vouloir se désolidariser de l’Etat du Cameroun et de sa monnaie, le Franc CFA.

*Des sources bien informées renseignent sur la valeur réelle de cet étalon : 1 Ambacoin vaudrait 0,25 dollar, soit****143 FCFA***

Des sources bien informées renseignent sur la valeur réelle de cet étalon : 1 Ambacoin vaudrait 0,25 dollar, soit **143 FCFA**. Même si la campagne lancée peine à rassembler dans les milieux sécessionnistes à l’instar  du « Conseil de gouvernement ambazonien », ou de la « République fédérale d’Ambazonie’’, plus de 31.000 unités ont trouvé preneur. Ce qui représente un peu plus de 7 600 dollars, soit **4.353.077 FCFA**.

Hormis la défense de la cause séparatiste brandie par les initiateurs de ce projet, ces derniers envisagent également « *financer l’envoi d’aide humanitaire dans les zones anglophones du Cameroun*, « , apparaît-il sur leur site internet. Plus encore, ils prévoient «*financer la défense des communautés contre la répression du régime* ». Celui de Yaoundé, en l’occurrence. Envisagent même plus-tard établir  des « *bons du Trésor* » en « Ambacoin » susceptibles d’être rachetés par l’Ambazonie si cette entité autoproclamée parvenait à devenir un Etat indépendant.

l’Afrique du Sud qui héberge déjà une bonne brochette de la diaspora séparatiste, par ailleurs lieu d’émission de la télévision sécessionniste, Southern Cameroon Broadcasting Corporation (Scbc), sert de base arrière aux initiateurs de la campagne d’achat des « Ambacoin », apprend-on de sources avisées. Initiateurs regroupés au sein d’un Directoire composé de 5 personnes, toutes basées dans des pays étrangers outre l’Afrique du Sud.

<https://ecomatin.net/cryptomonnaie-afrique-du-sud-comme-base-arriere-de-la-monnaie-virtuelle-des-ambazoniens/>

1. **Attractivité : Le Cameroun reste une destination touristique, malgré les crises sécuritaires**

Le pays a franchi une fois de plus la barre d’un million d’arrivées internationales en 2017. Un regain d’intérêt pour la destination dans un contexte de crise anglophone et après la menace Boko Haram.

[**EcoMatin**](https://ecomatin.net/author/admin8664/) [Suivre sur Twitter](https://twitter.com/ECOMatin1)[Envoyer un courriel](mailto:articles.ecomatin@gmail.com)5 octobre 2018Dernière mise à jour: 9 novembre 2021

Le Cameroun se positionne comme une destination touristique de choix dans la sous-région. C’est l’une des leçons à retenir du dernier rapport « Hospitality Report 2018 » réalisé par le groupe Jumia spécialisé dans la réservation en ligne des chambres d’hôtels. Le pays a en effet encore dépassé le million d’arrivées internationales en enregistrant 1,012 millions de visiteurs en 2017. Ce chiffre est certes en légère baisse par rapport à 2016 où le rapport indiquait 1,093 millions de touristes internationaux, mais la performance est à saluer, au regard des différentes crises sécuritaires qui secouent le Cameroun depuis quelques années. Après une légère baisse dans le secteur du tourisme aux heures de la menace Boko Haram, il y a donc une sorte de regain d’intérêt pour la destination Cameroun, ce malgré la crise dans les régions du Nord-Ouest et du Sud-Ouest. « Le Cameroun connait une stabilité relative sur le plan touristique par rapport à 2016, malgré la crise dans les régions dites anglophones », souligne le Rapport selon lequel

*les dépenses des visiteurs étrangers ont généré 1 860 milliards de FCFA et devraient augmenter de 3,9% à la fin de cette année 2018.*

Les voyageurs internationaux génèrent 71% du PIB direct des voyages et du tourisme en 2017, contre 29% pour les nationaux.

Une opportunité pour les diverses industries connexes, notamment les agences de voyages, les établissements d’hébergement, les restaurants, compagnies aériennes et d’autres services de transport de passagers, culturels, sportifs et récréatifs. Les secteurs du voyage et de l’hôtellerie ont réussi à stimuler des exportations, fourni des devises et créer des emplois pour de nombreux Camerounais, note le rapport. D’après les estimations, ce secteur emploie 604 500 personnes, soit 2,8% de l’emploi dans le pays. Un pourcentage qui devrait augmenter de 5% d’ici la fin de 2018 et de 3,3% par an d’ici à 2028 pour atteindre 875 000 emplois (soit 9,5% d’emplois du pays), selon les prévisions. Les recettes du secteur tourisme quant à elles ont augmenté, passant de 560 milliards FCFA l’an précédent à 631,2 milliards en 2017 pour une contribution directe de 3,2% au PIB. Les institutions de Bretton-Woods envisageaient une croissance encore plus forte avec une contribution de 7% au PIB pour près de 1 000 milliards de FCFA de recettes d’ici à 2028.

La Coupe d’Afrique des nations (CAN 2019) que le Cameroun va abriter représente une réelle opportunité en termes des supporters touristes qui vont affluer de par le monde. Un million de touristes sont attendus pour le seul mois pendant lequel va se dérouler la compétition, selon le Conseil national du tourisme. De quoi susciter l’intérêt des investisseurs. Le montant total investi dans ce secteur en 2017 s’élève à 107 milliards FCFA, soit 2,6% de l’investissement total dans le pays. Selon les prévisions du rapport, il devrait augmenter de 3,9% en 2018 et de 3% au cours des dix prochaines années pour atteindre 142 milliards FCFA en 2028, soit 2,2% de l’investissement dans le pays. Les investissements directs étrangers (IDE) dans le secteur du tourisme ont généré 10,7 milliards de FCFA en 2017, un chiffre qui connaîtra sans doute une hausse de 3,9% en 2018 et augmentera de 3% sur les dix prochaines années pour atteindre 146 milliards FCFA en 2028, selon le rapport de Jumia. « En prévision de la prochaine Coupe d’Afrique, le parc hôtelier du Cameroun devrait avoir de nouveaux établissements. On annonce l’ouverture de plusieurs hôtels sur l’ensemble du territoire d’ici la fin de l’année 2019. Hilton, Falaise, Onomo, Hyatt ou encore Radisson Blue, ces groupes hôteliers viendront ainsi renforcer ce secteur souvent critiqué à cause du manque d’établissements de haut standing », explique le rapport.

**Lire aussi :** [Tourisme : plus de 800 000 touristes internationaux enregistrés au Cameroun en 2018](https://ecomatin.net/tourisme-plus-de-800-000-touristes-internationaux-enregistres-au-cameroun-en-2018/)

| **Top 5 des destinations les plus sollicitées au Cameroun**  Douala, poumon économique du Cameroun, reste la destination la plus sollicitée au Cameroun, selon le rapport Hospitality 2018. Elle concentre 45% des visites, suivi par la capitale politique, Yaoundé, qui compte 29% des touristes. Les cités balnéaires de Kribi (14%) et de Limbe (5%) vont occuper respectivement la 3è et la 4è du classement des destinations les plus sollicitées par les touristes au Cameroun. Le Top 5 est complété par Maroua (4%), le chef-lieu de la région de l’Extrême-Nord réputée très attractive pour les touristes internationaux grâce à ses nombreux sites touristiques. Le tourisme dans cette partie du pays a payé le lourd tribut de la crise Boko Haram il y a quelques années. Mais depuis l’année dernière, l’Extrême Nord redevient fréquentable. Les autres principales villes du Cameroun se partagent les 4% des visites restants.  Jumia Hospitality Report remarque que les Camerounais commencent à s’intéresser à leur pays, mieux, ils veulent de plus en plus découvrir et partager ses richesses. Par ailleurs, le prix moyen des hôtels dans les destinations les plus sollicitées a considérablement diminué, passant de 32 000 FCFA en 2016 à 28 000F en 2017. Yaoundé et Douala restent aussi les destinations de vol préférées dans le pays, alors que la France est la destination préférée des Camerounais. |
| --- |

**Les TIC pour doper la croissance**

La révolution numérique qui bouleverse tous les pans de l’économie n’épargne pas le secteur du tourisme. Le rapport « Hospitality Report 2018 » fait savoir ainsi que le rôle des agences de voyage en ligne prend de l’ampleur depuis l’arrivée des multinationales dans le pays. De plus en plus de Camerounais vont en ligne pour rechercher des informations sur les destinations touristiques, ils recherchent des offres et des réductions sur les hôtels et les compagnies aériennes, ils s’informent sur de nouvelles destinations ainsi que des forfaits de voyage, rapporte cette enquête. « Ils regardent sur Internet pour mieux préparer leurs déplacements et leurs voyages », commente un opérateur hôtelier. Les trafics sur le site Jumia se font à partir des téléphones portables (75%), les tablettes (4%) et l’ordinateur (21%°).

*Les réservations mobiles sur le site sont en hausse au Cameroun, passant de 44% au troisième trimestre 2017, à 41% au deuxième trimestre de la même année.*

Ces réservations sont faites parfois plusieurs jours à l’avance, observe le rapport. 28% de réservations un jour à l’avance, 40% entre 1 et 5 jours, 11% entre 5 et 10, 13% entre 10 et 30, et 8% plus de 30 jours avant. 11% de clients optent pour le mode de paiement via le mobile money, alors que 14% règlent leur facture par transfert bancaire, 10% dans les bureaux de Jumia et 65% à leur arrivée à l’hôtel. Une autre tendance intéressante soulignée par le rapport concerne les réservations par étoiles. En 2017, 1% de clients ont réservé un hôtel 5 étoiles, 12% ont réservé 4 étoiles, 34% un 3 étoiles, 36% optent pour un 2 étoiles et 17% réservent un hôtel une étoile.

**Lire aussi :**[Tourisme: de belles perspectives pour le tourisme d’affaires au Cameroun](http://tourisme:%20de%20belles%20perspectives%20pour%20le%20tourisme%20d%E2%80%99affaires%20au%20Cameroun/)

Le résultat, selon les acteurs, de plusieurs facteurs comme la démocratisation de l’Internet notamment à travers les Fournisseurs d’Accès Internet (FAI) de plus en plus nombreux qui redoublent d’imagination pour faciliter l’accès à internet au plus grand nombre. Au moins 6 millions (25%) de personnes utilisent désormais internet selon l’Hospitality Report 2017. Plusieurs tendances technologiques façonnent le secteur de l’hôtellerie, à l’instar du marketing vidéo en ligne, un des outils les plus vitaux pour le secteur de l’hôtellerie, relève le Rapport. Son haut niveau de mémorabilité et d’engagement fait de la vidéo en ligne un mode de marketing populaire auprès des hôteliers pour attirer un plus grand nombre de clients et fidéliser les clients actuels. Les hôtels et restaurants utilisent aussi la réalité virtuelle autre que la réalité augmentée pour offrir aux clients la sensation des chambres d’hôtels avant même d’arriver. Des compagnies diffusent des voyages virtuels devant les cabines pour anticiper les ventes de billets. « De nombreux sites et pages web à l’instar de Jumia Travel, Investir au Cameroun, Cityzeum etc. promeuvent le tourisme depuis plusieurs années à l’échelle nationale comme à l’international (dématérialisation des frontières) …De nombreux hôteliers et opérateurs touristiques digitalisent leurs actions marketing afin de tirer profit du trafic internet grandissant. En somme, internet continue de rapprocher inexorablement touristes et opérateurs touristiques au Cameroun », explique **Yan-marie Mintsa**, directeur Jumia Travel Cameroun.

<https://ecomatin.net/attractivite-le-cameroun-reste-une-destination-touristique-malgre-les-crises-securitaires/>
