# Supplementary material
Source: Research Square preprint supplement (doi:10.21203/rs.3.rs-8545290/v1)
Supplement: Supplementary file 2 [file 3d631a19324d145a70105fad.docx]

| 1/21/2023 4:44 AM | | | | | | | |
| --- | --- | --- | --- | --- | --- | --- | --- |
| Node Summary | | | | | | | |
| PHD Thesis Coding | | | | | | | |
| 1/21/2023 4:44 AM | | | | | | | |
| **Source Type** | | **Number of Sources** | **Number of Coding References** | | **Number of Words Coded** | **Number of Paragraphs Coded** | **Duration Coded** |
| **Node** | | | | | | | |
|  | | | | | | | |
| **Nickname:** | **Nodes\\Conflict** | | | | | | |
| **Classification:** |
| **Aggregated:** | **No** | | | | | | |
| Document | | 7 | 89 | | 13,623 | 267 |  |
|  | | | | | | | |
|  | | | | | | | |
| **Nickname:** | **Nodes\\Economic Consequence** | | | | | | |
| **Classification:** |
| **Aggregated:** | **No** | | | | | | |
| Document | | 7 | 41 | | 6,721 | 111 |  |
|  | | | | | | | |
|  | | | | | | | |
| **Nickname:** | **Nodes\\Effects** | | | | | | |
| **Classification:** |
| **Aggregated:** | **No** | | | | | | |
| Document | | 8 | 106 | | 16,510 | 245 |  |
|  | | | | | | | |
|  | | | | | | | |
| **Nickname:** | **Nodes\\Financial Support** | | | | | | |
| **Classification:** |
| **Aggregated:** | **No** | | | | | | |
| Document | | 7 | 21 | | 2,598 | 40 |  |
|  | | | | | | | |
|  | | | | | | | |
| Reports\\Node Summary Report | | | | Page 1 of 3 | | | |
| 1/21/2023 4:44 AM | | | | | | | |
| **Source Type** | | **Number of Sources** | **Number of Coding References** | | **Number of Words Coded** | **Number of Paragraphs Coded** | **Duration Coded** |
|  | | | | | | | |
| **Nickname:** | **Nodes\\Hostage** | | | | | | |
| **Classification:** |
| **Aggregated:** | **No** | | | | | | |
| Document | | 6 | 22 | | 4,118 | 82 |  |
|  | | | | | | | |
|  | | | | | | | |
| **Nickname:** | **Nodes\\Human Interest** | | | | | | |
| **Classification:** |
| **Aggregated:** | **No** | | | | | | |
| Document | | 8 | 29 | | 4,390 | 67 |  |
|  | | | | | | | |
|  | | | | | | | |
| **Nickname:** | **Nodes\\Lives Lost** | | | | | | |
| **Classification:** |
| **Aggregated:** | **No** | | | | | | |
| Document | | 8 | 62 | | 8,724 | 183 |  |
|  | | | | | | | |
|  | | | | | | | |
| **Nickname:** | **Nodes\\Peace and Unity** | | | | | | |
| **Classification:** |
| **Aggregated:** | **No** | | | | | | |
| Document | | 8 | 143 | | 20,994 | 272 |  |
|  | | | | | | | |
|  | | | | | | | |
| **Nickname:** | **Nodes\\Protest** | | | | | | |
| **Classification:** |
| **Aggregated:** | **No** | | | | | | |
| Document | | 7 | 19 | | 2,431 | 49 |  |
|  | | | | | | | |
|  | | | | | | | |
| Reports\\Node Summary Report | | | | Page 2 of 3 | | | |
| 1/21/2023 4:44 AM | | | | | | | |
| **Source Type** | | **Number of Sources** | **Number of Coding References** | | **Number of Words Coded** | **Number of Paragraphs Coded** | **Duration Coded** |
|  | | | | | | | |
| **Nickname:** | **Nodes\\Responsibility** | | | | | | |
| **Classification:** |
| **Aggregated:** | **No** | | | | | | |
| Document | | 8 | 63 | | 8,338 | 133 |  |
|  | | | | | | | |
|  | | | | | | | |
| **Nickname:** | **Nodes\\Security and Defense** | | | | | | |
| **Classification:** |
| **Aggregated:** | **No** | | | | | | |
| Document | | 7 | 62 | | 9,227 | 107 |  |
|  | | | | | | | |
|  | | | | | | | |
| **Nickname:** | **Nodes\\Violence** | | | | | | |
| **Classification:** |
| **Aggregated:** | **No** | | | | | | |
| Document | | 8 | 122 | | 17,678 | 333 |  |
|  | | | | | | | |
|  | | | | | | | |
|  | | | | | | | |
|  | | | | | | | |
|  | | | | | | | |
|  | | | | | | | |
| Reports\\Node Summary Report | | | | Page 3 of 3 | | | |
