# Supplementary material
Source: Research Square preprint supplement (doi:10.21203/rs.3.rs-8545290/v1)
Supplement: Supplementary file 3 [file 40b1695422382c36b750c636.docx]

1. Fight Against Illegal Arms: Govt Blame Ambazonia Activists For Supply To Separatists

**Govt Blame Ambazonia Activists For Supply To Separatists**

By Ignatius Nji

As the crisis that has been rocking the North West and South West regions, which has spiraled into an armed conflict, rages on, the government has stepped up its crackdown on all those suspected to be activists or sympathizers to the Anglophone course.

In this light, security operatives have been indiscriminately arresting Anglophone activists and suspected activists. This has caused many of them to flee into hiding and the whereabouts of many is not known.

In order to bring the worsening situation under control, the government through the creation of the Disarmament, Demobilisation and Rehabilitation Centre (DDR), for ex-fighters have made repeated calls for the remaining fighters in the bushes to drop their weapons.

In this light, the government through the Prime Minster Chief Dr. Joseph Dion Ngute on Wednesday 19 May 2021 in Buea destroyed some illegal firearms allegedly seized from separatist fighters as part of efforts to fight crimes

and eliminate threats from terrorism in the Central African nation.

The burning destroyed weapons confiscated by defense and security forces were voluntarily surrendered by ex-separatist fighters, Prime Minister Joseph Dion Ngute said during the ceremony held in Buea, the chief town of the country’s Southwest region.

“This ceremony is an illustration of Cameroon’s willingness to remain in peace”, Ngute said in a speech before the weapons were set ablaze.

“The flames should be seen as a sign of hope; hope for a Cameroon where weapons are only held by those legally entitled to hold them. The hope of a peaceful, united and prosperous Cameroon in its wonderful diversity,” he said during the ceremony heavily attended by members of the diplomatic corps and representatives of the United Nations and African Union.

Cameroon is facing security challenges in its English-speaking regions where separatist fighters want to create an independent nation continues to carry out assaults on civilians and government forces.

The Prime Minister said the government was finalizing plans with bilateral and multilateral partners to facilitate the reconstruction and development of the regions that have suffered the adverse impacts of violence.

But as they burn these guns, government forces have been burning civilian houses in Kumbo, Bamenda and other localities in the North West and South West regions while the armed conflict continues.

Prior to the burning of the seized weapons, repeated clashes between separatist fighters and government forces at the peak of the crisis have left many houses and villages razed by flames leaving the occupants with no other choice than to flee for their lives.

And in order to fight against the illegal possession of weapons, the military had since in 2017 when the crisis escalated been on crack down on those suspected of supplying the fighters with these weapons.

Their crackdown has led to the arrest of some suspected persons dealing with illegal arms while other have seen their homes and property engulfed by fire.

According to military sources, some of those arrested and still under detention have revealed vital information on how these guns are being smuggled into the country.

Through interrogations and communications links from the phones of those arrested, the military it is alleged have been able to discover that some Ambazonia diaspora have connection with the supply of weapons to some of these fighters.

Prominent amongst the names of those alleged of supplying weapons to the restive Anglophone regions are Ayaba Cho Lucas (Norway), Eric Tataw (USA), John Bechu (Sweden), Mark Bareta Bara (Belgium), Chick Fon Levi (Sweden), Solomon Amabo (South Africa), Tangwan Wallace Ndi (Germany), Milan Atam (South Africa), Verla Franklin (USA) and Erica Akaba (Belgium)

These alleged promoters or sponsors of the crisis have seen some of their relatives back at home arrested for questioning while others property and houses have been set ablaze.

A case in point is that of Solomon Amabo ,  Eric Tataw, Chick Fon Levi and Tangwan Wallace Ndi whose family houses in Bamenda and in the South West region were burnt to ashes allegedly by the military early October 2017 after the manifestations on October 1, that swept across the Anglophone regions as peaceful protesters took to the streets chanting songs of victory and liberation.

It is worth noting that some of these alleged arms suppliers mentioned above were equally accused of masterminding the school massacre at the Mother Francisca International Bilingual Academy in Fiango, Kumba, Meme Division of the South West region where seven school kids were killed by unknown armed men.

Minister Paul Atanga Nji of Territorial Administration is said to have suggested to the Secretary General at the Presidency, Ferdinand Ngoh Ngoh in the letter that the only way to arrest the incessant killings of civilians by suspected separatist fighters is to track down those Cameroonians fueling the crisis and repatriate them to the country to face the law.

It should be noted that if these persons are repatriated to Cameroon they will be tried in a military tribunal under the anti-terrorism law whose maximum penalty is the death sentence.

Sources say the arrested activists are being tortured and detained under unspeakable and inhuman conditions. Some have reportedly died in detention.

Just recently, the government in another move to fight the influx of illegal weapons into the Anglophone regions, have closed its borders between Donga Mantung in the North West Region with Nigeria where it suspected that huge consignments of weapons entered the country via Nigeria illegally.

It is worth mentioning that a court in [Cameroon](https://www.aljazeera.com/topics/country/cameroon.html) in 2017 sentenced seven activists from the country’s Anglophone minority, including their leader, to up to 15 years in prison for rebellion and acts of “terrorism”.

Mancho Bibixy, a radio presenter in the English-speaking Northwest Region, and dozens of fellow activists were arrested in January 2017  in Bamenda as part of a crackdown on a budding Anglophone secessionist movement.

The movement accuses President Paul Biya’s predominantly Francophone government of marginalising Cameroon’s English-speaking minority.

What began as a peaceful protest movement in 2016 by teachers and lawyers against the perceived marginalisation of the English-speaking minority became an armed conflict following violent crackdowns by government forces.

The violence helped generate support for separatist movements, including armed groups aiming to create an independent state.

Tens of thousands of Cameroonians have fled reprisals by state forces to neighbouring [Nigeria](https://www.aljazeera.com/topics/country/nigeria.html), while government forces have been accused on several occasions of targeted killings, arson and looting.

Since the armed conflict started in the North West and South West regions at least 3,000 people have been killed according to early 2020 statistics by the United Nations. Many more have been internally displaced and over 30,000 have fled to neighbouring Nigeria where they are living as refugees.

<https://www.edennewspaper.net/fight-against-illegal-arms-govt-blame-ambazonia-activists-for-supply-to-separatists/>

1. **Govt Steps Up Crack Down On Suspected Separatist Activists**

**By Kum Leonard Njie**

As the crisis that has been rocking the North West and South West regions, which has spiraled into an armed conflict, rages on, the government has stepped up its crackdown on all those suspected to be activists or sympathisers to the Anglophone cause.

In this light, security operatives have been indiscriminately arresting Anglophone activists and suspected activists. This has caused many of them to flee into hiding and the whereabouts of many is not known.

Sources say the arrested activists are being tortured and detained under horrendous and inhuman conditions. Some have reportedly died in detention.

We gathered that security forces have also intensified their search for family members of the late Pa Pa Encho Eyo Alfred including his wife, Mehoye Lydia who is seeking asylum in Greece. Because of accusations levelled against them for having separatist sympathies, sons and daughters of Mama Mehoye Lydia have fled the country and are seeking asylum abroad.

They include Encho Rodriguez Encho seeking refuge in neighbouring Nigeria, Tchamon Thomas Encho seeking asylum in Strasbourg, France, Encho Valery seeking refuge in neighbouring Nigeria, Encho Ngemou Mathias seeking asylum in Basel, Switzerland, Tagi Encho Emmanuel seeking asylum in Berlin, Germany, and Mpetanji Loveline Encho seeking refuge in Libreville, Gabon.

They have all been accused of spreading information of suspected members of the separatist group who are fighting for the independence of a country they have named Ambazonia.

Meanwhile, Encho Ngemou Mathias, resident in Switzerland, has been very active in the struggle for Ambazonia independence. He has led many peaceful protests in Switzerland in front of United Nations Parliament in Geneva. By so doing, he became known and popular because videos of his protests have been viewed on YouTube, Facebook and blogs such as MyKontriPipo (MKP), Tweeter and other social media platforms.

He was at one point arrested by Swiss police while leading a peaceful demonstration in front of Cameroon Embassy in Bern-Switzerland in 2016. He also led another protest in front of Intercontinental Hotel in Geneva in 2017 while President Paul Biya was lodging at the hotel.

During such protests, Encho Ngemou Mathias also faced attacks and lots of challenges from the hands of President Paul Biya’s guards.

Encho Ngemou Mathias, represented Ambazonia Interim Government as Country Head at the 40th Session United Nations Human Rights Council in Geneva from March 11 to 22, 2019. He is also organising secretary responsible for printing of Ambazonia flags, t-shirts, caps, badges, banners among others used during demonstrations in Switzerland and around Europe.

Because of his active participation and commitment in the Ambazonia independence struggle as a freedom fighter, Encho Ngemou Mathias was elected Widikum Local Government Area Chairman (LGA). Widikum is located in Momo division of the North West region.

Encho Ngemou Mathias resident in Basel, Switzerland is seeking asylum alongside his daughter Ngemou Miriam-Carsey Mehoye and other extended members of his family. However, the whereabouts of some members in his family remain unknown.

The young activist Encho N Mathias is also believed to have fled to Switzerland, as a result of being a traditional ruler (Next of Kin) after the passing away of his father in a village called Olorunti under Ambelle clan, Widikum, Momo division of the North West region.

Furthermore, while in the struggle for Ambazonia independence, he was accused of promoting the separatist movements’ agenda by organising protests using social media.

Some of his extended family members had earlier been arrested when security forces conducted a search in the village to weed out the supporters of the Ambazonia propaganda. His uncle died in detention though charges were yet to be pressed on him.

The armed separatist group loyal to the secessionist movement called Ambazonia, it should be said, is a self-determination organisation seeking the independence of the Southern Cameroons from the predominantly French-speaking part of the country.

If he returns to Cameroon and is arrested, Encho Ngemou Mathias will be tried in a military tribunal under the anti-terrorism law whose maximum sentence is the death penalty.

It should be recalled that leaders of the Anglophone separatist movements including Sisiku Ayuk Tabe and nine others, who were arrested in Abuja, Nigeria in January 2018 and later extradited to Yaounde, are currently serving life sentences at the Kondengui maximum security prison in Yaounde.

One of the movements struggling for the independence of Ambazonia include Southern Cameroons National Council, SCNC, which has as motto “The force of argument, not the argument of force”.

In January 2017, the regime of 84-year-old Paul Biya, through the Ministry of Territorial Administration banned the SCNC and the Cameroon Anglophone Civil Society Consortium, arresting some of the leaders while others fled the country. Both groups, it should be pointed out, have overtly opposed what they term the marginalisation of Anglophones and violations of the terms of union that brought British Southern Cameroons and French Cameroon together in 1961

<https://www.edennewspaper.net/govt-steps-up-crack-down-on-suspected-separatist-activists/>

1. **University Of Buea Protest: Students Still Paying Price For Fighting For Their Rights Four Years Later**

By Brian Fomukong
Over three years into the armed conflict in the North West and South West regions of Cameroon, some youths continue to be victims for being neutral in the face of the crisis as well as advocating for their academic rights.
Human rights bodies report that hundreds of young men are still being held in detention centres across the country in horrible conditions. According to a Human Rights Watch report in August 2019, Cameroon authorities had “several detainees incommunicado and tortured”. Many, it added, “were in detention on suspicion of being involved with or supporting armed separatist groups operating in English-speaking regions of Cameroon.”
Since a peaceful student protest in the University of Buea in 2016, security forces have not only cracked down violently on students, but are said to have gone after several innocent youths for being close to those suspected of taking part in the peaceful protest. The students were, among other things, demanding that their then Vice Chancellor, who is now secondary education minister, addresses them on their presidential excellence award grant as well as the lack of a concrete structure for the advocacy of students’ rights.
In a brutal crackdown by the forces of law and order, hundreds of youths were detained and tortured with the whereabouts of many still unknown to date. Female students were also allegedly raped by soldiers sent to their hostels to pull them out. Media reports later suggested some of the arrested had been forcefully trained and sent off to combat Boko Haram terrorists in the Far North region.
25-year-old Azentem Nkwinkeh was one of the victims of the crackdown that saw him tortured by the forces due to his brother’s involvement in the on-campus student protest. His brother, Legwitagua Nkwinkeh Nchijie Jr, with a couple of other student-detainees had successfully escaped and has since been on the run for fear of his life.
After several failed attempts to get Azentem’s brother, security forces resorted to using him and many others like him as bait, engaging in several methods to get them including torture and threats. On one of his many trips to his village, he was ambushed and sustained a knife wound that left him almost unconscious but was saved by passersby.
Suspected state security agents are said to have intensified their threats as the crisis in the regions escalated into an armed conflict, accusing the student -detainees of siding with separatist fighter groups. Azentem’s family, media reports highlight, was not left out. One of these was a January 15 anonymous letter requesting that their parents hand over their children or they will be attacked. Reporting the incident to the police and their lawyer, the family later revealed, yielded no fruits, forcing them to relocate him for his safety.
Though Azentem Nkwinkeh is believed to have left the country, threats to his family and those of other students whose relatives or acquaintances had anything to do with the 2016 student protest, reports note, have intensified, leaving many fearing for their lives.
In a recent report by the Coalition of Civil Society-Human Rights Organisations for Peace in the Anglophone regions and affected regions, they condemned what they noted were “armed attacks against the civilian population in the North West and South West regions of Cameroon”.
To them, the “Cameroon government has failed in its international commitments to protect civilians on the one hand and to immediately launch an urgent and effective investigation into all allegations of human rights violations against its security forces somewhere else.”
With such attacks still on the rise, the coalition urged the Security council, the UN General Assembly, the UN Human Rights Council and Human rights organisations “to effectively contribute to ending impunity for actors of human rights violations.”

<https://www.edennewspaper.net/university-of-buea-protest-students-still-paying-price-for-fighting-for-their-rights-four-years-later/>

1. **Journalists increasingly targeted for arrest as Anglophone crisis rages on**

**By Ignatius Nji**

As the crisis that has been rocking the North West and South West regions rages on, many journalists are increasingly being targeted for arrest.

Many Cameroonian journalists, it should be said, have in recent months either been arrested or jailed simply because they were doing their job.

This is the case of Ayika Vennessa Fonyuy, who worked with Canal 2 television. After being hinted that security operatives were planning to arrest her due to her reporting of the crisis, Fonyuy had to go underground for fear of her life.

We gathered that she is being accused of tailoring her reports towards directions that favour the separatists who are demanding for the independence of what they have termed Ambazonia.

It should be recalled that popular Equinoxe TV journalist, Mimi Mefo, was arrested in 2018 and charged with propagating false information and terrorism.

Media rights groups said then that the arrest of the then Equinoxe broadcast journalist was an attempt to silence outlets that report on the crisis in the Anglophone regions.

Amos Fofung, former reporter with *The* *Guardian Post*newspaper, fled to the United States after he was arrested with three other journalists and detained in a prison in Yaounde for six months.

He said he was released after authorities investigated all his articles and social media accounts.

“The day I was actually released I was told that I should refrain from reporting the anglophone crisis and that is why after my release, I decided to stay mute,” Fofung said.

Since the separatist crisis began in 2017, at least 15 journalists report they have been threatened by separatists.

Authorities meanwhile have arrested at least 12 reporters and charged them with terrorism or propagating false information. All but one have been released.

In its 2019 World Press Freedom Index, Reporters Without Borders ranked Cameroon 131st in the world, down two places from 2018.  It said arbitrary detention and prosecution of journalists continue to be frequent.

<https://www.edennewspaper.net/journalists-increasingly-targeted-for-arrest-as-anglophone-crisis-rages-on/>

1. **Gov’t Spreads ENAM Graduates To City Councils**

By Ignatius Nji, Elias Ngalame & Kowac KK Bandolo

The appointments decree of the 14 City Council Secretaries General on Friday May 24,2019, fell like an unexpected bombshell. Among those appointed are divisional officers to man the position of Secretary General.

This comes at a time when there is a public outcry for the National School of Administration and Magistracy with French acronym ENAM to be reviewed , better structured, her relevance revisited or even scrapped, according to SDF 2018 presidential candidate, Hon Joshua Osih during his presidential campaign.

This in an apparent move to continue the strangle hold by the central government on local councilsand by extension according to political strategists, dashed hopes for dialogue on the form of the state leading to a return to federation.
The presidential decree read on state radio Friday May 25th reveals that 10 City Council scribes have been retired and replaced immediately. Douala, Yaounde, Limbe, Bamenda, Kumba, Edea, Bertoua, Ebolowa, Ngaoundere, Garoua and Kumba all have new faces to head the secretariats.
Those of Kribi, Nkongsamba and Limbe were transferred while Maroua’s was maintained.
According to one of the decisions, Anuafor Cletus Asongwe leaves Tiko Subdivision as Divisional Officer to assume the office of Secretary General at the Bamenda City Council. The senior civil Administrator replaces Waindim Jude Nsom.
Mr Nokuri Samuel Nokpa, who served as Divisional Officer of Ngambe Sub Division in the Sanaga Maritime Division, Littoral Region, was also appointed  Secretary General of the Limbe City Council, in replacement of Charles Arrey Nkongho, who moves to Kumba City Council in same capacity.
From the Limbe City Council, LCC, tireless workaholic Charles Nkongho was pushed next door to the town of friendship, Kumba, where he is expected to use his long years of field experience attachment to a visionary developer like GD Andrew Motanga Monjimba to catapult the Kumba City Council, KCC, into an Eldorado. Close friends to the out-going LCC SG say Mr Nkongho is a fine-brain and a focused organiser.
It is expected that the GD to the KCC, Victor Ngoh Nkelle, will patiently listen to this development-bulldozer of a man and exploit his wit and saviour faire. It’s true that the KCC has less opportunities to make things happen as compared to LCC but KCC has much unexplored potentials waiting for the new SG to make bare.
On the other hand, the Bamenda City Council, BCC, of GD Vincent Ndumu will be receiving another ENAM graduate in the person of Anuafor Cletus Asongwe. The new SG is a principal administrative officer with good records as a people-centered-developer. His track record is quite rich as an Assistant Senior Divisional Officer, ASDO and a Divisional Officer, DO, to Tiko from where he now leaving to BCC. His admirers say he is very calm and composed with a listening ear. It’s being said that with him going to Bamenda in the peak of anger and trouble, he is tipped as the reliable person for the job an immediate solution to the repeated BCC management crisis.
The question on many lips is, could these appointments signal a new twist in City Council management with the appointment of more ENAM graduates to the position of Government Delegates in the days, weeks, months ahead. Should the cities be managed by ENAM graduates coupled with the fact that SDOs are supervisory authorities of councils, it only goes to confirm government’s unwillingness to actually hand power back to the local people.
On the questions on what role have the appointed Government Delegates in City Councils when local councils have elected mayors, Chongwean Hyginus, a teacher said, the Government Delegates only help to frustrate the action plans of elected opposition mayors and create tension wherever harmony is needed.
Blasius Charles Nji, a journalist added, Government Delegates are only there to build stone walls against elected mayors.
It is the first major move taken by the Head of State after the peace mission of Prime Minister Joseph Dion Ngute to the conflict hit North West and South West regions.
The appointments have raised questions over the sincerity of the dialogue announced by the Head of Government.
Commentators say this is clear proof that, the regime is bent on decentralization whose implementation has been perilous since enshrined in the constitution in 1996. They believe that the highly centralized power is one of the main causes of the ongoing deadly conflict in the Anglophone regions.
Rather than signing decrees, the experts say, people expect the President to translate his dialogue wish to action.
As enshrined in the 2004 Decentralisation law, City Councils whose Government Delegate and Secretaries General are appointed by the President have superiority over elected local councils officials including mayors.
The city council scribes define internal procedures and coordinate work of the city council, implement policies designed by the Government Delegate and also ensure the prompt processing of files. They evaluate activities and ensure staff are trained.
It is suspected the appointment of Government Delegates might follow soon.

<https://www.edennewspaper.net/govt-spreads-enam-graduates-city-councils/>

1. **Human Rights Group Decries Situation Of Women In Battle Zones**

Dr Kelly Ngyah CEO MAHSRA

By Ignatius Nji

Deeply concerned about the situation of women and girls living within the Anglophone regions in the wake of the on-going crisis, a Bamenda based rights group, Modern Advocacy For Humanitarian Social and Rehabilitation Association, MAHSRA has in a communiqué decried the deplorable state at which women and girls find themselves.

According to the CEO of MAHSRA, Dr. Kelly Ngyah the situation is so alarmingly appalling to begin imagining what the women and young girls in the North West and South West regions could be going through especially those within highly affected zones. Amidst the increasing violence and tensions wherein whole villages are burnt down, bullets flying everywhere and heavy sporadic gun-firing sounds keeping the people in their hideouts scared to their nerves.

He questions whether there has been any thought about what the women and young girls in such particular areas may be going through. The countless situations of health hazards including poor feeding habits or complete starvation; usage of un-sterilized or infected items or bush leaves for their hygiene and reproductive health control issues; and brutality in the forms of sexual abuses, battering by not only rascals but some men in uniform as was the case in Bamenda on Monday 22 at a gas station. Those hiding in the bushes are battling with infectious bites from insects and even animals like snakes.

In similar situations across the world, when women and young girls become so demoralized and miserable, Dr. Kelly, recounts how the victims would turn to either prostitution or other form mean activities, in order to earn a living. He furthered that the situation of the victimized women and girls in the Anglophone zones is worse because they are not even granted such rare “evil privilege”. The towns frequent shutdown through unexpected ghost town calls by Ambazonia freedom fighters have further worsened the situation by decreased in socio-economic activities coupled with government imposed curfews which officially limits movements from 5am to 9pm only.

How are the victimized women and young girls in the North West and South West regions faring? He asked in bewilderment saying it is very disgraceful, despicable and appalling when sane people keep noticing such inhumane and unfortunate abuse on women and girls especially when actors and most importantly the government have the responsibility to bring to a stop the already escalating conflict through an inclusive dialogue process.

Hear him, “I believe it is good time for the women human rights defenders, women socio-cultural groupings and women entrepreneurs to stand up and voice a stop to all the on-going atrocities. It is the image and well-being rights of all the women in Cameroon that is at-stake.

No Cameroonian woman is exempted from this mockery and disrespect of their development rights as well as other regretful assessments concerning much disrespect on the instituted laws of the land. The government of Cameroon as well needs to recognize that if the current abuses on the Cameroonian women and girls continue the credibility of all its reports with respect to its commitment towards the Convention on the Elimination all Forms of Discrimination against Women (CEDAW) will be in jeopardy.”

<https://www.edennewspaper.net/human-rights-group-decries-situation-of-women-in-battle-zones/>

1. **SDF Flagbearer Has No Nationality Issues – NEC**

**By Ignatius Nji**

The National Executive Committee of the Social Democratic Front Party SDF headed by Ni John Fru Ndi has declared that the party’s flag bearer for the 2018 Presidential Poll, Hon. Joshua Osih Nambangi has no issues of nationality as recently propagated by the rumour mill.

According Dr. Forjindam, the SDF party had filed in to ELECAM a complete file with a copy of a duly signed declaration of his nationality which is no other than Cameroonian.

Speaking on Saturday 28, July in Bamenda after the one item NEC meeting, Dr. Forjindam, the party’s internal auditor told pressmen that they as a party are going in to this election with all the confidence to win and win big and that they are not scared their candidate would be rejected. He reiterated that before the party made the choice of Hon Joshua Osih, they made sure everything was intact and to the best of their knowledge Hon. Osih is going to do the job well.

To him this unfounded talk on Hon. Osih Joshua having a dual nationality is being propagated by some CPDM cohorts who are frightened of SDF’s Candidate in the upcoming election. Dr. Forjindam wondered aloud how people can put to question the nationality of a sitting law maker when it is clear that tabling documentation for any national election requires that a certificate of nationality be included.

Commenting on Osih’s foreign trip abroad where he met with Cameroonians in the Diaspora, Dr. Forjindam said the flag bearer went out there not only to galvanize support but to sought out ways of resolving the ongoing crisis in the country.

On the question as to how SDF is planning to tackle campaigns and eventually have election in the restive Anglophone zones, the spokesperson for NEC said his party has a strategy to go about it when the time comes and for the funding he said the SDF party and its militants are already mobilizing resources for campaign.

Osih’s challenger is incumbent President Biya who is said to have won all elections in Cameroon since 1992 and the question as to what would be the difference come October 7, Presidential polls.

Dr. Forjindam retorted by saying President Biya has never won an election since 1992 rather he has been rigging but this time around SDF is not going to take the usual rigging laying down. The party has put in place a strategy to counter any move to rig in favour of any Candidate.

The SDF he said, has taken care of ELECAM, a structure which the main opposition party has always looked at with disdain given its form and structure, manned by appointed regime barons and former CPDM diehards.

On the question of a possible coalition with other Candidates to come up with single candidate to face President Biya, sources within SDF indicate that in the days ahead Cameroonians would be served with surprises for discussions have been advanced in that direction.

<https://www.edennewspaper.net/sdf-flagbearer-has-no-nationality-issues-nec/>

1. **Tambe Tiku Insists ELECAM Is Incorruptible**

ELECAM Board Member Speaks Out
-Insists ELECAM Is Incorruptible
-Warns Politicians Against Corruption
-Blames Low Voter Registration On Ghost Towns
-Cautions Political Parties To Assist Militants

Preparations for elections in 2018 have entered high gear. At the level of political parties, the ruling party; CPDM, and leading opposition party; SDF, have organised political training seminars to equip militants with necessary tools and skills well ahead of time. The mandate of the current Head of State, Paul Biya, ends in 2018. The Senators, National Assembly members and Municipal councilors will also terminate their five years mandate in 2018. The first Regional Council election in Cameroon is equally expected next year.
2018 will therefore be a politically crowded year for politicians, militants and voters at National, Regional, Divisional and sub-divisional levels.
The body responsible to oversee the proper and smooth organisation of these elections is Elections Cameroons, ELECAM. Recently, ELECAM board members made regional tours to all the ten regions across the country. Their mission was aimed at educating voters and assessing the level of voter’s registration.
One of the Board members assigned to the South West Region, Dr. Christopher Tambe Tiku, spoke to Eden on the motive of their tour and other major issues at stake. He spoke to Eden’s Cham Victor Bama. Read on…

Eden: You recent rounded up the tour of the South West Region to assess the voter registration exercise; how can you measure the situation on the ground?

Tambe Tiku: The trips were jointly carried out by the two ELECAM Board members, Governor Ejake Mbounda and I, assigned to oversee work in the South West Region. We went to Fako, Meme, Ndian, Lebialem, Manyu, and Kupe-Muanenguba divisions to assess the ongoing registration process. Overwhelmingly we still have complains of people dragging their feet when it comes to the registration exercise.
We seized the opportunity to inform all the stakeholders on the important role they are supposed to play as far as this process is concerned. We reminded them of the intention of the legislator who had opted for a holistic approach to the electoral process in Cameroon. By this I mean getting all the stakeholders involved for the whole process to be credible and transparent.
But some of the joint commission members seemingly have not been participating in the process. And as a result, it has affected the entire registration process because this work was supposed to be carried out by joint commission members alongside ELECAM staff. Political parties were also to assist ELECAM towards this strive of registering Cameroonians who have attained the age of 20.
We seized the opportunity also to inform them that 2018 is not far; it is at the corner. There is the tendency of people waiting till when elections have been called up before they start galvanizing their militants. So we thought it was necessary for us to bring to their attention the limited period we have as far as elections are concerned. Most of these elections will take place in 2018.
If we were to go by the dates available then we have just three months to have electorates registered. I am here referring to June, July and August 31st. If for example elections have to be held next year starting with senatorial elections, then we have just one month, the beginning of the electoral process, for that process to wrap up before electorates are called to the polls. Virtually there is no time and it was necessary for the board members to impress on this.
We are happy that most of them assured us that they were going to strategise and see how they can register more of their militants even though most of their complains centered on the unavailability of identification documents.
They also complain that some of the areas are enclave. But we think that it is also the responsibility of the political parties to assist their militants in some of these areas.

Your visit came at the time the South West is recovering from severe injuries inflicted by the socio-political unrest in Anglophone Cameroon. How has it affected the registration process?

We cannot deny the fact that ghost town phenomenon has hugely impacted on the work of our field staff. In some of the areas we received complains of hostile reception that our field staff have received and we also have advised them to be more prudent in the way they do their work. In some areas it is no more secret that the offices are closed because of threats that ELECAM staff have received and as a result of that there is no way we cannot link to the timid registration process which is ongoing and the figures have dropped significantly. Apart from other factors that have contributed, the ghost town or generally the social upheaval have also contributed to low registration.

What significant progress has been recorded per division in the voters registration exercise?

So far, we noticed that Ndian has registered the highest. Fako has also registered a significant number of voters. Manyu, Kupe-Muanenguba and Meme that used to have a good record in terms of registration have dropped. Apart from that we should also take our responsibility that most of people are ageing and kits operators are having difficulties with some of these machines. So, from time to time machines that are bad are forced to be sent back to the regional delegation for repairs. And before these machines are repaired it takes quite a while and as a result people have to wait for the machines to be put in order.
It’s a whole multiplicity of problems. It cannot only be linked to the ghost town phenomenon which has been identified as one of the major problem. The outing that we just made has given hope in the process. I am sure before August comes to an end the numbers which were documented would have doubled if not tripled.

The impact of the ghost towns phenomenon is visible though, but don’t you think
Cameroonians may have other better reasons as to why they still are not interested in the voter registration exercise? Maybe hovering doubts on its free, fair and transparent organisation of elections in the country?

That was the message we carried all through the divisions. We accepted some of the lapses of 2013 even though those elections were properly conducted and accepted by both the national and International community. But because we are striving towards improving on the process we must also recognise the fact that there were some shortcomings, not only human but we also had some material concerns which we think can be addressed. And once they are addressed the people will be ready to accept what we are doing.
It was also an opportunity for us to caution some of our field staff who have been in one way or the other involved in some dirty dealings. We made them to understand that there will be zero tolerance for some of these vices. The whole idea is to ensure that whatever people are doing is in accordance with what the legislator has put in place. It will be ironic that after putting so much to embark on the biometric system then we allow ourselves to be overtaken by corruption and then we start messing up the process.
We have sent a signal and also cautioned some our staff, reminding them of some of the dealings of politicians who will want to come closer to them and only for their own interest. The process may mar our process too because if people see that you are not doing the right thing, there is no way they can accept the results whatever you come out with. I think that if there is any work to be done as far as transparency is concerned this is done at the level of registration and distribution of cards and not only on Election Day. ELECAM will not be present on the Election Day. It will just be the stakeholders themselves. We have the responsibility to educate the masses and inform them that credible elections are not organised on the day itself; it is a whole process, from the pre-electoral period right up to the post-electoral period. This is the process that we are committed to and that is why you see members of the electoral board going to the field from time to time. They don’t wait until elections are called and they start going to talk to election stakeholders.
The role of the electoral board is to ensure that the electoral code is respected.

Many people have accused the party in power of the approach adopted in handling the recent socio-political unrests in the Anglophone regions and that it may influence future political consultations. It is purported that plans are underway to negotiate with ELECAM in order to secure victory especially in the South West Region. How true or false?

As a person I have not heard any rumor. This is the first time I am hearing that. I don’t think it is possible. The way elections are conducted in this country, it is very difficult to penetrate ELECAM staff. If you are penetrating the staff then it is in connivance with the party. This is an approach that involves all stakeholders. If you are participating at all the levels, it becomes very difficult to accuse ELECAM. I want to say that those are mere speculations because there is a problem on the ground and people think that the ruling party may be affected by the crisis. But then elections are something whose results you cannot determine. It depends on how the parties have placed themselves, what manifesto they have to attract more voters on their side.

The way forward as ELECAM braces up to 2018?

I think voter apathy can be dealt with from your own organisational approach to elections. When people are confident that you are neutral, transparent they don’t perceive you to be corrupt, people get involved in the process and accept what you are doing and participate. But once you are perceived to be corrupt it becomes a very serious problem because it means that you have to change the mindset of the people before you proceed. You cannot change the mindset of the people by using the same mindset that created the problem to solve the problem.
From time to time consultation forums should be organised with all the stakeholders to inform them. ELECAM cannot take hostage the entire process. There must be room for stakeholders to come out and also express their views on how things are conducted at the level of ELECAM. That is why it’s very important that from time to time all the stakeholders meet with ELECAM officials to evaluate and brainstorm on approaches to take as far as elections are concerned.

<https://www.edennewspaper.net/7281-2/>

1. **Do Your Work Well, Despite Threats -Governor Okalia Sides The Press**

By Bama Cham

Journalists practising in the South West Region have been urged to do their work well, despite threats.
The encouragement came from the Governor of the South West Region, Mr Bernard Okalia Bilai, at the close of the 51st edition of the National Youth Day in Cameroon celebrated last 11 February 2017 in Buea.
Governor Okalia hailed the press for living up to expectations in the heat of the recent crisis.
“I want to thank the press for the good work they are doing by sustaining the rights of children to go to school, by sensitising the population on their various rights, on what is good for our communities,” Governor Okalia said.
Okalia continued that “I urge the press to continue doing the good job despite the threats. I know that there are a lot of threats, there will always be threats, do your work, you are helping the nation, you are helping the communities, and you are helping the country.”
The pupils, students, youths and guests who braved the fear and threats to be a part of the celebrations at the Buea Independence Square, listened to a replay of the Head of State’s traditional Youth Day address to the nation before the special march past exercise grouping some primary, secondary and higher institutions and youth groups.
The South West Governor, Bernard Okalia Bilai, described the action by some youth to celebrate the 2017 Youth Day as a demonstration of a high sense of civic responsibility and patriotism.
He said “It is with satisfaction and joy because we have witnessed a wonderful march past despite the threats. Satisfaction because the youth, the children have taken the courage to come and participate with the rest of the youth of the nation.”
Bernard Okalia enjoined the population of the South West that “those who have been misled or those who participate in one or another malpractice, should reconcile with the entire community so that we should continue to be part of the construction of this country like the Head of State invited the youth of the nation yesterday.”
With a timid turnout by school going youths, especially as most colleges and primary schools were still gathering momentum for effective takeoff barely few days after the suspension of the protracted strike action by the All Anglophone Teachers Trade Unions, Bernard Okalia advised all that “I want us to allow our children to enjoy the right of being educated or going to school because they can’t be leaders of tomorrow without schools today.”
As things gradually gain steam, Governor Okalia urged that “those who have been misled should reconcile with themselves so that on Monday the activities in all sectors of life should continue, children should go to schools.”
“Traders should freely carry out their activities, and politicians should do their politics. Politics to politicians, school for children, business for businessmen,” he said.
He further stressed on the respect of state institutions and that “the entire population of the South West region should remain peaceful and law-abiding”, re-echoing that, “it is always said that Limbe and Buea are the cities of friendship and legendary hospitality.”
Following the meeting held last Monday 6 February 2017 at the South West Governor’s office and chaired by Governor Bernard Okalia Bilai, mission and lay private schools were duly instructed to open their doors in order to allow students and pupils regain curricular activities. Defaulters, the meeting resolved, will face sanctions.
The Catholic Education Secretary, Rev Fr Sob Alexandre, among other mission schools, had declared open their school doors for students and pupils to regain classes.

<https://www.edennewspaper.net/do-your-work-well-despite-threats-governor-okalia-sides-the-press/>

1. **Ndop Prison Razed, Inmates Escape, Warden Kidnapped**

By Ignatius Nji
Ndop principal prison has been reduced to ashes and all inmates but three have escaped and one prison guard is reported to have been kidnapped. The incident occurred in the night day breaking Sunday 29, April  2018.
One of the inmates who stayed back because of favorable prison conditions given that he lives with his family in a private apartment near the Prison yard which is a rare privilege is, Wasum Augustine, former Mayor of Balikumbat.
From information gathered on the ground it is not yet established as to who are behind the brake in and burning of the Prison. With the kidnapping of a heavily pregnant warden, fingers are pointing at the Ambazonia freedom fighters who many suspect had carried that operation to free some of them who were being detained in that prison.
A resident at Mile 25 Ndop told Eden by phone that armed men invaded the Prison and the kidnapped female warden tried to shoot out failed to hit her target. After freeing the prisoners about 500 of them and setting the whole prison structure on fire, they collected all ammunitions from the Prison and took along the female prison warden.

At the time of going to press the number of casualties after a heavy gun battle and damage caused at the prison was yet to be established.
Meanwhile on the sidelines, the State Counsel for Boyo Division Tabufor Francis Tanyi, was reportedly kidnapped around Belo by Ambazonia freedom fighters and a catholic Priest Reverend Father Jude sustained a bullet wound on his leg as he was trying to get a patient to hospital.
In a related development, the YCPDM section President of Mezam IV Bafut, Mr Ngwakongo Lawrence was kidnapped last Tuesday evening at his residence by gun men and his whereabout is unknown.

<https://www.edennewspaper.net/ndop-prison-razed-inmates-escape-warden-kidnapped/>

1. **Desperation For Peace**

                        The Tumi – Munzu Convened Confab:

                                   Desperation For Peace

Versus

Anglophone ‘Extremist/Legitimate’ Concerns

And

Govt’s ‘Hard, Defiant’ Stance

The world is replete with seemingly intractable crises. And almost all the crises are the result of differences between the oppressed and their oppressors; between people rising up against perceived injustice, marginalization and domination and those who strive to maintain the statusquo. At the world stage, the Israeli/Palestinian, Russian/Chechnya, Sri Lanka/Tamil, Spain/Catalonia are among those that make headlines. In Africa, conflicts continue to rage on in Western Sahara, DR Congo, CAR, Senegal/Casamance, Mali/Tuareg, Nigeria-Delta- Biafra, to name but these.

Yet, the more intractable these remain, the more efforts to try to resolve them spring up. Cameroon, hitherto referred to as an island of peace in a sea of unending strife, has since 2016 joined this unenviable club with rapidly growing ramifications. National and international appeals for a peaceful resolution have fallen on unwilling ears. In the face of this boiling conundrum, and with both sides appearing to have reached their wits ends, except for increased brutality, hopes seem to have been ignited with new efforts from a consortium of actors including the clergy and civil society.

But the proposal has been received with mixed feelings across board.

While some see it as a possible panacea to end the excessive bloodletting, torture, arson and untold suffering including the grounding of socio-economic life of the two affected regions, the majority see it differently. While the initiative enjoys the credibility of high standing religious profiles especially that of Cardinal Christian Tumi, it nevertheless  appears to be short of clear cut specifics as to what it seeks to achieve vis a vis Anglophone demands and aspirations. It sets very lofty conditions to be met by both the government and the Anglophone activists without any assurances that they would be met. The activists have wasted no time to denounce it and have gone ahead to schedule their own meeting in Washington DC, ten days before that of Tumi & co in Buea.

To compound matters, government which observers say, was supposed to embrace this “God – sent” initiative, as guarantor of peace and security of the vulnerable population, and as a face-saving opportunity from a war that clearly appears embarrassing is yet to react. Although observers believe, government’s silence could be predicated on the alleged tussle between the pro-peace and pro-war mongers within its rangs, and a reflection of its well-known lethargic manner of conducting business, the foregoing doesn’t spell good omen for the proposed rendezvous in Buea.

Since August 2017 Separatist ambitions have long simmered in the two anglophone regions  after dialogue to address complaints of  gross marginalisation flopped.

The push for separation galvanised  the heavy deployment of troops and the open declaration of war by the head of state, spurring armed conflict  that has seen the livelihood of the population battered and hundreds of civilians and military lives lost. Entire villages have been burnt while thousands have either migrated to Nigeria as refugees or are living in bushes.

Observers say as with any armed conflict, civilians suffer more the consequences of the violence, insecurity  fear, torture and death.

Numerous national and international calls for cease fire and engagement of dialogue have not been heeded to, as government’s option of force through war, arrest and killings have instead radicalised and aggravated the situation by the day ,international observers say.

It is against this backdrop that promiment Anglophone church authorities led by His Eminence Cardinal Tumi and backed by diplomats like Simon Munzu are currently trying to secure peace through dialogue and concertation.

In a press release signed by Christian Cardinal Tumi, the Synod Clerk of the Presbyterian Church in Cameroon, PCC, Rev. George Babila Fochang, the Imam of the Bamenda Central Mosque, Tukur Mohammed Adamu and the Chief Imam of the Buea Central Mosque, Alhadji Mohammed Aboubakar ,the men of God have convened an Anglophone General Conference for August 29 and 30 in Buea. The objective of the conference is to promote peace in Cameroon, the release said.

“As we all know, the people of these two regions have suffered enough hardship in the nearly two years since the present crisis erupted in October 2016. We believe that the moment has come to put an end to the conflict through a frank, inclusive and comprehensive national dialogue on the Anglophone Problem. We therefore, fervently appeal to the President of the Republic, Head of State, to organise such a dialogue as soon as possible.

In preparation for the expected dialogue,the church leaders see the need for Anglohones to concert and agree on a common agenda.

“We recognise the absolute necessity for the people of the Southwest and Northwest Regions to hold a preparatory general conference in order to agree on the issues to be examined at the national dialogue on the Anglophone Problem and to freely designate their representatives at that dialogue, the release said.

“Accepting our moral responsibility to promote peace and harmony among all God’s children, we hereby freely take the initiative to constitute ourselves into a college of conveners for the purpose of summoning the required General Conference of the people of the Southwest and Northwest Regions. To this end, we hereby convene an Anglophone General Conference (AGC) to be held in Buea on Wednesday 29 and Thursday 30, August 2018.

“The Anglophone General Conference will be organised by a broad-based conference organising committee comprising representatives of traditional and religious authorities, civil society leaders, professional associations, women and youth groups, trade union organisations, etc. Participation in the conference will be open, and limited to all Cameroonian citizens living in Cameroon or abroad who fall in one of the following two categories , » the men of God and covenors of the conference stated.

Increasingly, Anglophones from all walks of life have been reacting to the conference call. While a good number have hailed the move and looking forward to the D-day, a few others have resorted to public protest saying Southern Cameroon has reached the end of their tether.

But strong opposition is being voiced by seperatist activists who say the proposed  conference constitutes a real danger to the free Southern Cameroon drive and the fight against marginalisation.

In a letter to Christian Cardinal Tumi, Boh Herbert a Southern Cameroons pro-independence activists calls on Christian Cardinal Tumi the lead convenor of the conference not to allow his name  soiled by what he described as « condemned-to-fail All Anglophone Conference » .

«  Your people are Ambazonians; not Anglophones. They want control of their destiny; not some room sharing arrangement with colonialists. Your sheep, my dear pastor, is headed in a direction implement opposite to the one Dr. Simon Munzu and the CPDM mafia with which he deals are dragging you. Peace and justice in the Cameroons is no longer about our people begging anyone to hear our cry. It is about us obtaining what belongs to us as a birthright. No level of mediation or negotiation – unless it recognizes our nation – will stop our march to Buea.

« A free Ambazonia is not an option. It is the only option. Ambazonians shall live free or die. Please don’t resist the CPDM bandits all your life only to get entangled in their witchcraft in the wisest years of your life, » Boh Herbert  writes.

Like him dissenting voices have continued to multiply seeing the Buea conference as a trap by the French led government to arm twist  the Anglophone (Southern Cameroon) struggle and sweep their genuin concerns under the carpet.

**Conference Support Voices**

Others though have expressed gratitude to the chief convernor for the positions he has always taken on challenging issues facing the country, especially issues bordering on human rights violation and poverty which have a tendency to dehumanize fellow human beings.

In another letter to Christian Cardinal Tumi, dated July 27th,2018  Dr. Joachim Arrey, translator and international communicator hails the church leaders for the initiative.

« You have always spoken out against bad governance in Cameroon and your publications and interviews stand to attest to your love and respect for human dignity, » he writes.

He believes the conference convened could be the trigger that might bring about a change in thinking among the warring factions.

«  War has never solved any problem. At best, it has only made things worse.  We all should ensure that human life should not be wasted and that conflicts should be resolved at the negotiating table, » his letter stated.

The idea he said is commendable and many hold that it could bring about some useful recommendations which, if well implemented, could spare the country the specter of war that is hanging over our heads. He however raised come concerns.

«  Over the last two years, the government has been arresting and jailing Southern Cameroonians living abroad when they come back home to visit their loved ones. For those who hold foreign passports, they are usually denied entry into the country. This has been a source of frustration for many. In this regard, I would like to hail your call for a general amnesty for all Southern Cameroonians living abroad and at home. Your call for the release of all those arrested within the framework of this conflict is also commendable. I know the government has not been very open to this idea. Are there any steps you and your peers are taking to ensure that the government pays heed to your call? » he questions.

Like him, many others have continued to hail the initiative as a potential pathway to the overdue crisis.

« The ongoing crisis must surely come to an end one day. The aspirations of federalists, seperationist, secessionists and one and indivisible Cameroon, will one day have a gateway.But the question is how will it be achieved on both ends.Therefore the initiative of Christian Cardinal Wiyghan Tumi and co should be given a listening ear and we see how the conclusion will look after all nothing lasts forever.

If we and some other people continue to give a damn about their initiative, then what do we think this whole issue call the ANGLOPHONE CRISIS which is real will come to an end, » writes Achou Gladys of the University of Toronto.
“It’s easier to be a critic than a creator. The government has a role to play in this if it must work. Taking advantage of this call to release all arrested and absolve all others of happenings would have been good, she concludes.

The convenors of the conference have also called on the strong collaboration and support of the government to make the event a successful one.

“We call upon the Government of Cameroon and the various armed groups that now operate throughout the territory of the Northwest and Southwest Regions, to declare an immediate end to military hostilities in these two regions and thus create favourable conditions for finding a peaceful and lasting solution to the Anglophone Problem and to ending the Anglophone Crisis in our country through dialogue.

“We pray the Government of Cameroon to create favourable conditions for the participation of all qualified individuals in the Anglophone General Conference by discontinuing all criminal proceedings and ordering the release of all persons currently detained in connection with the Anglophone Crisis as well as facilitating the return of persons who have been internally or externally displaced as a result of the Anglophone Crisis since October 2016, including those on exile and refugees.

Observers however think the different Anglophone leaders must take a strong position against any forms of prejudicial or hate speech that betrays the very struggle and change they have been yearning  for. If not, suspicion and divisions will flourish and they can only expect to see a deepening of the crisis at the detriment of the people for whom they claim to fight for.

<https://www.edennewspaper.net/desperation-for-peace/>

1. **Forward Suffer Don Finish Suffer Don Finish Or Suffer Dey Front**

By**Chief Zachee Nzohngandembou**

 The crucial role the SDF was to play in the establishment of modern Cameroon since 1990, its difficult and truncated road in attaining this feat, and its inability on most occasions to match rhetoric with actions on the ground to meet up with aroused expectations, could all be deciphered at birth. What was not immediately decryptable then, was how much of these successes and failures were going to be influenced by external pressures on one hand, and internal wranglings on the other.

As the party celebrates its silver jubilee, Eden peeps through these exciting and exacting 25 years to determine whether the SDF has put Cameroon on the path of *“Suffer Don Finish”* as its adherents cheerfully chanted, or on the tortuous corridor leading to “*Suffer Dey Front”,* as the party’s opponents jeeringly countered.

Shall we not accept that the party regarded as a forerunner to the birth of multi-partism in Cameroon (without forgetting Biya’s own initial vision enunciated in his *Communal Liberalism* and half-heartedly implemented in his dual policies of *New Deal* and *Rigour and Moralisation*; and the bold but poorly strategized efforts by Yondo Black and Albert Mukong and Co) meant indeed to erase the sufferings of Cameroonians. Who will deny the fact that without the SDF, the legislative arm of our government will be no different from that of the Ahidjo era? Who wouldn’t credit the SDF with being instrumental to ongoing efforts to reform the electoral process and fight corruption in the country, even if the party itself has not been a good example in fighting these ills?

Yet, as partisans like Prof. Tazoacha Asongaunyi and many others within and outside the party have maintained, a team that does not differentiate and prioritise *“self”, “party’* and “*country*” is not well placed to promote the values of collective leadership, political discourse, love and solidarity within the party itself and the country at large.

So was the SDF, from the word go treading on the path to “*Suffer Dey Front”* as charged by its opponents led by the CPDM? Professor Tazoacha Asonganyi gives us a clue to what was gnawing and bedeviling the party and leading it towards a vindication of the CPDM charge when he writes in his “The SDF Crisis”, that “some operations are fated to go wrong from the start. The SDF birth was facilitated by persons who later branded themselves *‘founding fathers’*. By the constitution they helped to write, they were supposed to play a central role in nurturing of the “baby” they had helped to deliver. But the baby belonged to society; it was not theirs. They were midwives,… their hour on stage had to be short and fretful … the birth of the SDF was supposed to cause their disappearance … from the stage. Unfortunately, instead of vacating the stage… the founding fathers attempted to act like Marx’s communists…(who) imposed themselves as the *‘selfless servants’* of truth whose conservation they sought… Most had a totalitarian view of politics and saw dissent as a betrayal; most saw antagonistic ideas as embedded in people who must perish with the idea in them through the famous Article 8.2.

“Instead of providing checks and balances, they thought they would provide the SDF, the founding fathers turned their baby into what Ngwasiri (Prof) described to Nyo’Wakai (Justice) in a correspondence in 1997 as follows: ‘those of you who are the Chairman’s close associates have built him into a powerful monster and dictator who has been trampling on democratic ideals with impunity. The SDF is today a party without history because its history is that of one man.” *(see accompanying article).*

Whatever view one may have of the SDF as a party and its 25 years of existence, we invite the reader to peruse through this package put together by our crack team of reporters in order to assess which of the mantras better describes the country’s leading opposition political party. It is a package that can quite comfortably be described as *the good, the bad* and *the ugly* of the SDF.

As another lead for this special edition we carry an exclusive story based on the letter addressed to President Paul Biya by the self-exiled, self-styled President Fon Forgum Gorji-Dinka, of his dream country called the Republic of Ambazonia.

Fon Gorji-Dinka is a well known activist seeking the restoration of Southern Cameroons. He is one of, if not the first Anglophone to serve as President of the Cameroon Bar Association in the 70s. He was, before entering headlong into the struggle against what has been called the Anglophone Problem or Anglophone marginalization, an astute courageous and highly priced legal luminary.

We publish the letter in its entirety not because we subscribe to his vision and tactics but in our sworn commitment to encourage the free flow of ideas without gagging any shades of opinion as enunciated in President Biya’s New Deal agenda.

<https://www.edennewspaper.net/forward-suffer-don-finish-suffer-don-finish-or-suffer-dey-front/>

1. **How Nico Halle, Ngnie Kamga Mediated Peace At NW Courts**

**By Ignatius Nji**

Henceforth no French language shall feature in Common Law courts in the North West and South West Regions given a consensus meeting that took place in Bamenda on Tuesday 14 March between Common Law lawyers, the Attorney General of the Region, Bar Council President, Ngnie Kamga and General Assembly President, Ntumfor Barrister Nico Halle.

This emergency meeting initiated by the peace-crusader, Barrister Nico Halle, was on the heels of a crisis that almost disrupted the courts because of a decision arrived at during a semester meeting by the Attorney General that submissions in courts should be done in French.

This move to foster peace, reconciliation between lawyers and get the Attorney General reverse the decision on language use in courts, reinstating English, was highly applauded by the public. The swift intervention in a situation that was almost degenerating into a problem of linguistic assimilation has raised the spirits of people in Bamenda and the entire North West Region.

The General Assembly President of the Bar, Barrister Nico Halle, was spotted at the Governor’s office where he spent a considerable time with Governor Adolphe Lele L’Afrique probably to brief him of the outcome of the meeting. There after the Attorney General, His Lordship Abah Ngoh, also went to brief the Governor on the same meeting and the resolutions arrived at.

The General Assembly President, Ntumfor Nico Halle, who is a reputable international legal consultant with expertise in election monitoring and in conflict resolution promised after being elected that he would ensure sanity in the Bar Council. He made it clear that the General Assembly of the Bar is the highest organ that takes decisions for implementation by the Bar Council executive headed by the Bar President. This was in response to those who were of the opinion that Anglophones have exchanged an elephant for a cricket.

<https://www.edennewspaper.net/how-nico-halle-ngnie-kamga-mediated-peace-at-nw-courts/>

1. **Mambanda Chief, Councilors On The Run**

**By  Johnson   Mbu**

**The Chief of Mambanda and some members of his traditional council are said to be on run after they were accused of having buried virgins in the village in order to neutralize the mystical powers of the Ambazonian Separatists fighters.**

The diabolic act broke out on social media weeks ago and is now gaining more more grounds as the councilors and their accomplices have all vamoosed from Mambanda to unknown destinations.  Even councilors who allegedly refused to participate in the macabre act are also on the run as the Amba Boys have promised to eliminate them in due time not only for attempting to neutralize their powers, but for terminating the lives of innocent Anglophones.

It is not clear how the Ambazonian Restoration Forces unearthed this act, or how it was being carried out.  One school of thought alleges that the act of burying the virgins alive was suggested by the administrative authorities, who contacted the traditional council to give that act a stamp of approval.

It is increasing being alleged that burying of virgins and other fetish objects is becoming and more authorized by government agents and indigenes and is becoming common practice in the Southwest and Northwest regions.

According to unconfirmed reports, the virgins buried are kidnapped from far away communities and taken to where the act is to be performed.

Wherever the virgins are brought from, general opinion say the act is not only uncivilized but a crime against God in which someday the perpetrators and their generation would have to pay for dearly.

It is alleged that that one of the councilor of the Mambanda traditional council who took the ADF to the scene of the incident was struck dead on the way by some mysterious forces.

However, one of the  councillors of the mambanda traditional council   who spoke to Eden  on condition of anonymity  suggested that it may be a  framed up story from their opponents  to  tarnish  the image  their person  and village.

<https://www.edennewspaper.net/mambanda-chief-councilors-on-the-run/>

1. **Fru Ndi Lambasts Cavaye Yegui Djibril For Alleged Vandalism**

By Ignatius Nji
Following the destruction of gadgets and other properties of the Cameroon Renaissance Movement (CRM) of Maurice Kamto, recently in the north region, varied criticisms have been pouring in from all angles.

The recent reaction comes from Chairman John Fru Ndi of the Social Democratic Front, SDF. He lambasted the action of vandalism coordinated and supervised by House Speaker Cavaye Yegui Djibril who put in flames gadgets and properties of CRM in his ( Cavaye) region of origin.
According to SDF Chairman, he is surprised that this unfathomable action is being masterminded by such a respectable personality in the country. He wonders aloud that this is a person who by prerogative of his office as House speaker at the time there was no Senate, he would have been Head State in case of vacancy at the helm.

Fru Ndi expressed his disgust at such an action which to him goes to tell of the deep seated demonic intent and evil plans for Cameroonian people by those who pass for the governing.
He was speaking on Wednesday July 17  in Douala as he accompanied SDF flag bearer Hon Osih Joshua to deposit his documentation at ELECAM for the race of 2018 Presidential election slated for October 7 this year.
Reacting to a call for coalition, Hon Osih said coalition is not
necessarily a precondition to win the 2018 presidential polls saying SDF
Chairman did in 1992.

What Hon Osih is missing out is that happened in 1992 manifested as a result of a coalition which took place under the umbrella of Union for change with Fru Ndi as flagbearer. However SDF flag bearer says the doors are open to any political party that want to join his party to flush out incumbent President Paul Biya who is seeking a seventh mandatesince 1982.

One of the youngest aspirants of them all, Cabral Libi revealed on his social media page that he has already paid in the caution of FCFA 30 million at the state treasury. Before now he had made it clear that 30.000 willing Cameroonians can contribute fcfa 30million by sacrificing just fcfa1000 to support any candidate of their choice. This answers the
puzzling question as to how aspirants would cough out the huge sum to meet up with one of the requirement to qualify as candidate to run.

So far the ranks of those to champion boycott of the Poll is increasing with Bernard Njonga and others joining Kah Walla of CPP who had earlier made her position known on the subject. Those joining her ranks present same argument that part of the country is restive which doesn’t warrant that election should take place without any feasible solution in sight.

<https://www.edennewspaper.net/7947-2/>

1. **Amba Boys Ignore Diaspora Ultimatum, Cast 3 Days Socio- Economic Paralysis With Raining Bullets**

By Ignatius Nji

For three days from July 16, businesses were shutdown travellers were trapped at motorparks, perishables were rotting off in bags, wounded civilians unable to access medical care while the dead were quickly starched in mortuaries, as Amba boys and the military got entangled in a show of who controls the English Speaking Regions. Sporadic shooting from both sides kept the restive areas lifeless as people hid themselves in their houses for fear of getting hit by a stray bullet.

In the Northwest, hot zones were found in Bamenda in Mezam, Kumbo in Bui and Wum in Menchum where the elite forces strived like never before to content with the high power shooting coming from an ill equipped Ambazonia Defense Force.From information gathered from Wum, the Amba boys attacked a Police checkpoint with few elements and gruesomely took away the life of a young Constable still in his prime. Some of Amba boys are said to have sustained injuries and later escaped. In Bui between Kumbo and Mbiame there are reports of a gun battle that saw the life of an innocent civilian, brother to the Fon of Mbiame, a retired teacher wasted by the military. Many arrests are said to have been carried out in Kumbo within the three days ghost town. In Bamenda though the Amba Boy paraded the whole city, the real battle was atAzire Church junction where the military stood face to face with the Amba Boys. The courageous Soldier fired the first shot which according to some onlookers, the bullet did not pierce through the bare bodied Amba fighter and in return at short range the Amba Boy fired a shot with a local riffle and the Soldier slumped. According to this eyewitness account, from what transpired at Azire Junction he says, there is no denying that the Amba Boys are using some strange mystical powers that fortify them against bullet. Elsewhere there are reports of how the military had neutralized and even killed many though moving about with the tied red pieces of cloth which symbolizes mystical powers.

The Amba boys had imposed a three day ghost Town across the two English speaking Regions much against calls from their leaders in the diaspora stating that only Monday be maintained. The Amba Boys ignored this call and held hostage activities in these Regions. The impact was also felt across the West and Littoral Regionsas businesses also witnessed a drastic drop given that most customers come in from the Northwest and Southwest Regions.

<https://www.edennewspaper.net/amba-boys-ignore-diaspora-ultimatum-cast-3-days-socio-economic-paralysis-with-raining-bullets/>

1. **Anglophone Crisis Affects Palm oil sector In SW**

Since the socio-political crisis started, nearly two years ago, in Cameroon’s Anglophone regions, palm oil processing has been facing various disruptions mainly within agri-business firms such as CDC and Pamol. This was reported by the Oilseed Sector Regulatory Committee.

Speaking during a meeting held in Yaoundé July 3, the committee’s chairman Emmanuel Nkoulou Ada commented that the Anglophone crisis has a direct mechanical effect on the sector, especially as CDC and Pamol are the county’s key processors. *“The volume generated from these firms is far below their capacity and also, they are unable to trade their products. This situation does not ease distribution,”* Nkoulou said.

Moreover, the official indicated that the companies have a foothold in other regions as they are inclusive organizations helping populations through the construction of schools and hospitals, as well as other social facilities.

Better still, both companies committed funds to boost yield. This covers 10,000 ha of palm trees for Pamol, and more than 12,000 ha for CDC.

Nkoulou, however, reassured that *“we should not be worried about any shortage, since it is just a part of production that is disrupted”*. He hailed government’s move in 2017, which authorized the import of 97,000 tons of oil palm to prevent shortages so far.

<https://www.edennewspaper.net/anglophone-crisis-affects-palm-oil-sector-in-sw/>

# Amba Boys Ignore Diaspora Ultimatum, Cast 3 Days Socio- Economic Paralysis With Raining Bullets

By Ignatius Nji

For three days from July 16, businesses were shutdown travellers were trapped at motorparks, perishables were rotting off in bags, wounded civilians unable to access medical care while the dead were quickly starched in mortuaries, as Amba boys and the military got entangled in a show of who controls the English Speaking Regions. Sporadic shooting from both sides kept the restive areas lifeless as people hid themselves in their houses for fear of getting hit by a stray bullet.

In the Northwest, hot zones were found in Bamenda in Mezam, Kumbo in Bui and Wum in Menchum where the elite forces strived like never before to content with the high power shooting coming from an ill equipped Ambazonia Defense Force.From information gathered from Wum, the Amba boys attacked a Police checkpoint with few elements and gruesomely took away the life of a young Constable still in his prime. Some of Amba boys are said to have sustained injuries and later escaped. In Bui between Kumbo and Mbiame there are reports of a gun battle that saw the life of an innocent civilian, brother to the Fon of Mbiame, a retired teacher wasted by the military. Many arrests are said to have been carried out in Kumbo within the three days ghost town. In Bamenda though the Amba Boy paraded the whole city, the real battle was atAzire Church junction where the military stood face to face with the Amba Boys. The courageous Soldier fired the first shot which according to some onlookers, the bullet did not pierce through the bare bodied Amba fighter and in return at short range the Amba Boy fired a shot with a local riffle and the Soldier slumped. According to this eyewitness account, from what transpired at Azire Junction he says, there is no denying that the Amba Boys are using some strange mystical powers that fortify them against bullet. Elsewhere there are reports of how the military had neutralized and even killed many though moving about with the tied red pieces of cloth which symbolizes mystical powers.

The Amba boys had imposed a three day ghost Town across the two English speaking Regions much against calls from their leaders in the diaspora stating that only Monday be maintained. The Amba Boys ignored this call and held hostage activities in these Regions. The impact was also felt across the West and Littoral Regionsas businesses also witnessed a drastic drop given that most customers come in from the Northwest and Southwest Regions.

<https://www.edennewspaper.net/amba-boys-ignore-diaspora-ultimatum-cast-3-days-socio-economic-paralysis-with-raining-bullets/>

1. **Ngie Amba Fighters Embargo CPDM Militants , Set Properties Ablaze**

**By Ignatius Nji**

CPDM militants in Ngie Subdivision in Momo Division have been embargoed from stepping their feet in the village again by Ambazonia fighters.

To match words with action ,properties owned by CPDM militants in the subdivision, are being set on fire, just to demonstrate how serious their threats are.

Most of those who can afford to escape from the villages in this subdivision had long left including the Divisional Officer who had elected residence in Bamenda and a working office at the SDO’s office in Mbengwi. CPDM militants who are still within the subdivision and cannot run away are said to have renounced their militancy to the Amba fighters and have sworn to have nothing doing with the ruling party again. Trenches have been dug on the road to Njikwa and Ngie with bridges destroyed to stop any advancing vehicles, especially those of the military from gaining access in to the area.

CPDM elite in Yaounde who sit for the party on political talk shows on television and radio stations are said to have received threatening messages from the Amba fighters.

The latest victim of the several threats was Mr. Ujambeng Stephen, a Yaounde based entrepreneur cum militant of the CPDM.

According to him, the panel was debating on how to tackle the upcoming Presidential campaigns in the restive areas and he was making proposals concerning his area. News got to him few day later that his house in the village had been reduced to ashes before setting fire to the house.

Other sources on the ground state that, agents of Amba fighters in Momo spotted, Ujambeng Stephen at AyabaHotel recently having a close discussion with Minister Paul AtangaNji.

According to them, there was nothing in the discussion other than narrating on how forces could get to Njikwa and Ngie area and neutralize the Amba camps. On his part Mr. Ujambeng said that his discussion with Minister AtangaNji had nothing to do with Ngie or Njikwa. And more to that he reserves the right to discuss with anybody in government and that his close ties with most top government officials should not be a point of envy.

To him, he is suspecting that such information can only get to them from his detractors from within the party who pretend to have the interest of the country at heart yet liaising with separatists.

<https://www.edennewspaper.net/ngie-amba-fighters-embargo-cpdm-militants-set-properties-ablaze/>

1. **Gun Battle In Kumba Leaves Two Dead, Others  Injured**

By Johnson Mbu

Reports of  serious gun battle  allegedly  between the Ambazonian Defense Force and security  forces in Kumba, chief town  of Meme division, on the night of Tuesday 6 February breaking Wednesday 7 February 2018 is said to have left two persons  dead with one purportedly  belonging to the ADF  and an undisclosed number of others injured.
Though we could not independently confirmed the allegation, it is alleged that  the fighting between the gendarmes and the attackers which centred around Buea Road close to the gendarmerie station equally  left several gendarmes dead  and  others seriously  wounded.
The gun battle that went on for several hours could be heard in almost all the corners of  Kumba which left denizens  panic-stricken with  some  attempting to run away from  their houses that night. While several others had to abandon the comfort of their beds to sleep on the floor, others hid themselves in their toilets, wardrobes and under their beds.
The body of the ADF fighter with a read piece of cloth tied around his wrist and some fetish object around his waist and another person shot in the head were abandoned where they were killed for the public to pass and see them.  The number of the gendarmes killed or wounded is not known.  It is being rumoured that the wounded, especially the killed gendarmes were immediately taken to the mortuary.
Some persons still cast doubt whether the person killed with the red piece of cloth across his wrist and juju around his waist was an Ambazonian   fighter.
Since the  beginning of  gun battles  between  security  forces  and  the Ambazonian   Defense Forces,  ADF, in Meme division, many persons  especially those of who  Kwa-Kwa, Bole, Ikiliwindi, Kombone, Dieni, Matoh etc have  fled their homes and are  seeking  refuge in  bushes, Kumba or other towns.
The question on the lips of many now is when the battle will be over?

<https://www.edennewspaper.net/7824-2/>

1. **Meme SDO Suspends Commercial Motorbikes, Bars Indefinitely**

By Johnson Mbu

The  Senior  Divisional  Officer  for  Meme  division  in  the  South West  region,  Ntou’ou   Ndong  Chamberlin,  has  suspended  the  activities  of  motor bikes  and  drinking  establishments   like  bars, snack  bars  and  Nightclubs  from  9pm  to  5 am  till  further  notice.
The  decision   signed   on   Thursday 8  February 2018  by   the  Meme   SDO  which  copies  where  handed  to  Eden, states  that the  decision  is  due  to  the  persistent   threat against  social  peace  and  national   security especially  in  Meme  division   which  has  become   a  battle   field  between  the  Cameroon  defense  forces   and  the   Ambazonian  Defense   Forces,  ADF.
The   two  separate  decisions  issued  by   Ntou`ou  Ndong   Chamberlin   says   the  order  suspending  motor bikes  and  drinking  establishments  in  Meme  division   and  Kumba  in   particular  till   further  notice   will  be   effective  as  from  9 pm to  5 am  from  Monday to Sunday.  The  communiqué  is  calling  on  the  population  to  go  about  their  daily  activities  without  fear.
While  encouraging  the  population  of  Meme  and  Kumba in particular  to  collaborate  with the  administration and  the  forces  of law and order  by  denouncing  systematically  all  suspected  individuals  or  activities  that  will  destabilise  the  division,  the  Meme  boss has warned that anyone  who  will  violate  the order  will  face  the  heavy  arm  of the  law.
The  decision  of  the   SDO,  many  say,  has been  prompted   by  attempts  to  assassinate   him  twice  and the  recent  gun battle  in  Kumba  in the night of Tuesday  7 February  breaking   Wednesday  8  February  2018  which  left  two  persons  dead  behind the  gendarmerie brigade.

<https://www.edennewspaper.net/meme-sdo-suspends-commercial-motorbikes-bars-indefinitely/>

1. **Northwest Weekly Round-Up**

By Ignatius Nji
Mass Arrests In Donga Mantung
Several people are reported to have been arrested by the security in Mbuwat village and taken to Nkambe detention centers since Tuesday 21, August. These poor villagers are accused of harbouring militants of the Ambazonia Freedom Fighters and to regain their liberty, three of them are being asked to pay the sum of Fcfa 500.000 each for bail. Mbuwat is in total confusion given that these three are young enterprising youth and the fear of what happened to those arrested recently in Ngarum village in Ndu may happen to them.
Villagers are knocking their heads to raise the said sum of Fcfa 1.5million. Friday report revealed that the three arrested had been transferred to Bamenda after failing to make available the said sum. One Tambaa, a dealer in building materials in Mbuwat is presently on the run being hunted by the military and his wife was asked to surrender her national identity card and would only recover it when her husband shows up.
Meanwhile in Ngarum, Village in Ndu Sub Division, three youngmen were whisked off from the village by forces of law and order and their lifeless bodies were later found decomposing kilometers away from the village around Ndu Tea Estate. This happened after the shooting of a military man at Mbiyeh cooperative by unidentified gunmen suspected to belong to Ambazonia Freedom Fighters. When the families of the deceased went to recover the corpses for burial, they were each asked by the military to pay the sum of FCFA 100.000 before taking the corpses. Some of the family members who tried to agitate were arrested and are presently being held in unknown location.
Abduction In Bali
The population of Bali was on Wednesday 23, August taken aback with the broad daylight abduction of a popular butcher who was a Subsection President and Councilor of Bali council under the CPDM party. He was taken away from his shop at the market where he had just displayed meat for sale and the lifeless body was found not too far away from the market. The said councilor was accused by the Ambazonia freedom fighters for spying on them and reporting to the forces of law and order, reason for his abduction and termination of life.
The Butcher is said to have been so courageous a young man and is said to have been boasting that nothing can happen to him when a warning notice was delivered to him some times back by Amba boys. Angry Fon Dr.Ganyogha of Bali, declared war against the Amba Boys saying he shall make sure the prison yard is transformed in to a military camp. About 1000 soldiers are destined to take up permanent station within Bali to face the Ambazonia freedom fighters that are said to have equally declared war against CPDM in Bali.
The site of the road construction company SOGEA SATOM working on the Bamenda/Babadjou stretch of the road, was attacked by some unidentified persons and equipment vandalized. NW governor Adolf Lele A’fric visited the site and condemned in strong terms such acts of vandalism and assured the company that security network is trailing to track all the perpetrators of such acts for law to take its course.
High Court President Kidnapped In Wum
Menchum Division has suffered a setback with the recent abduction of the President of the High Court of Wum,Justice ItoeMukete, on his way to Bamenda and his whereabout is still unknown. Another gun battle was recorded in Esu on Tuesday between the military and the Ambazonia freedom fighters. Reports state that several persons sustained wounds which might lead to loose of lives if medical attention is not sought fast. This is the second abduction of a State Counsel after that of Boyo who was finally released some days later.
Impostor Arrested In Mankon
In Bamenda II the Ambazonia Police Force in Mankon had arrested two impostor Amba boys. They were accused of passing for Amba boys and stealing from peoples’ shops after raising false alarm in the quarters. They were beaten and decided not to hand them over to forces of law and order for fear that they might be killed. A uniformed Police Officer of GMI, who went to visit the girl friend in Akum from kilometers to Bamenda was shot by unknown gunmen on the evening of Wednesday August 22 and his is presently receiving treatment.
Mayor Defies Threats, Solemnizes Own Marriage 15years After
Mayor Peter Tem Cheghe, of Zhoa Council in Fundong Subdivision in Menchum has had his fair share of the dead threats from supposed Amba Boys who more than often place demands for payment of ransom or risk being kidnapped and probably killed. This notwithstanding the Mayor has been braving the odds to carry out his duties as the Municipal head of that area hosting several Amba camps. Two times heavy gun battles have taken place in Esu village that ended with many lives lost within the municipality.
One of such uncommon bravery demonstrated at a time most Mayors had vacated their municipalities to safe grounds out of Menchum is when he organized a solemnization of his 15 year old marriage in a holy matrimony with his wife Madam Justine Nnapi.
According to the officiating Priest reverend father Francis Wam, citing from Ecclesiastics chapter 26 verses 1 to 4 and verse 13 to 16, he said the celebration of a holy matrimony was a mystery and that what God has joint together nobody can put asunder. He reiterated that without the Lord’s grace within, the marriage will never be successful and coming to the alter was to confirm the love for one and other. Fr. Francis wam who is rector of the quasi Parish of Wum called on the celebrants to henceforth live in God’s grace because it is a mystery written in Heaven and on Earth.
Himself a traditionalist, Mr. Cheghe thanked the head of the Roman Catholic Church for innovation that brought enculturation where the culture of a people cannot be a barrier to anybody who wants to benefit from the grace of Jesus Christ.
Two Gendarmes Allegedly killed In Wum
Two gendarmes are reported to have been allegedly killed last Friday 24, by unidentified armed men in Zhoa, a locality situated in Wum, Menchum division of the North West Region.
Security forces say the Zhoa gendarmerie was attacked early on Friday morning by unidentified armed men killing twogendarmes and severely injured the Brigade Commander.
The brigade which is situated 20 kilometers from the Wum brigade was not accessible in the morning after the unidentified armed men blocked the road making it difficult for military reinforcement from town.
The attacks come on the back of numerous incidents that have occurred in the Menchum in recent weeks with the president of the court of 1st instance of Wum Tahle Mukete Kidnapped at the start of the week. This has led to the increase of insecurity in the Anglophone region as death rate increase drastically without solutions.
With Reports From Christina Atoh & Faith Abang ( UB Students Journalists On Internship)

<https://www.edennewspaper.net/northwest-weekly-round/>

1. **Amba Boys Dismantle Gang In Wum After Journalist Attack**

By Ignatius Nji
An armed gang of nine is said to have attacked the home of Charles Kebua Che, Northwest correspondent with HiTV, in Wum headquarters of Menchum Division. In a machete battle with the gang, Kebua Charles successfully chased away the intruders but sustained a life threatening machete wound on his head.
According to the Buea based television channel NW correspondent, his entire househood was awaken to a frightening human voices outside his bedroom window. This was on the night of Sunday 19, August and members of gang were ordering his wife to tell her husband to open the door and give them what they want. Before he knew it, the criminals who had introduced themselves as Ambazonia freedom fighters had torn open his porcelain window cover with a long knife. He darted out of the room and sneaked himself in the living room, grabbing a sharp cutlass and stood by the door in readiness for them.
The thieves started breaking his door down and when the lock fell off and the door came falling inside, one of them inched the door curtain and moved in beckoning others to follow him. That was when he mustered every energy and strength in his muscle and landed a swift strike on the back of the intruder and he stumbled over his veranda and fell outside. In pursuit, Kebua did not notice another gang member stood on his left and landed a machete on his forehead which proceeded with machete fight despite the oozing blood from the wounded head. Other gang members sensed danger and took off in to the dark and the others followed.
When it was daybreak, news went round and people started streaming in to see what happened and Amba boys in Wum got wind of the incidence. They immediately mounted a manhunt on the gang and before long the leader of the gang was apprehended and he was compelled to reveal names of his gang members after receiving a bullet on his leg, saying they had just moved in from Douala on a mission to be robbing people in the name of Amba Boys. At this time Kebua Charles had rushed for medical attention.
The gang leader was shot by the Amba Boys and later the other eight members were fished out from their hideout which also served as a warehouse for storing stolen goods. The eight were escorted out of Wum Town and probably taken to their camp somewhere in the forest.
The Gendarmerie Officers in Wum who had congratulated Kebua Charles for standing up to the criminals, swoop in and took hold of all the content of the warehouse to their Office for people to come identify. Unfortunately those who turned up were rather held in custody for failing to report the robbery cases.

<https://www.edennewspaper.net/amba-boys-dismantle-gang-in-wum-after-journalist-attack/>

1. **Anglophone President Could Be Temporary Solution To Cameroon Crisis**

Electing an Anglophone as President of Cameroon could be a temporary solution to the crisis in the country as well as help consolidate national unity and living together, an expert has recommended.
Prof. Willbroad Dze-Ngwa, Professor in Political History and International Relations made the recommendation on Thursday during an event to celebrate the International Day for Living Together in Peace organised by the Denis and Lenora Foretia Foundation.
According to Prof. Dze Ngwa, if there was to be another Presidential election in Cameroon, then all contesting parties should invest an Anglophone as a candidate in order to get the country’s first ever Anglophone President.
To him, this will help calm the Anglophone frustrations in the country but added that it goes just beyond getting an Anglophone President to solve the problems in the country and consolidate living together.
“Living together should not just be a slogan but should be an action, persistent, insistent in order to bridge the gap that has been shaken…it is important for Cameroonians to come together and think about this notion,” he said while adding releasing all those detained in connection to the crises in Cameroon will help diffuse the situation.
On his part, Prof. Tangwa Godfrey challenged Cameroonians to see their cultural diversity as an opportunity rather and a challenge which has plunged the country into its present state.
Panelists at the event all agreed that Cameroonians should focus on what unites them if they have to consolidate peace and living together but stressed that the government must make a bold step to ensure and enhance a sincere dialogue amongst its people.

<https://www.edennewspaper.net/anglophone-president-could-be-temporary-solution-to-cameroon-crisis/>

1. **Anglophone Crisis Is More Than One Government To Handle- Dr Christopher Fomunyoh**

**By Ignatius Nji**

US Based, Cameroonian born Dr. Christopher Fomunyoh, Regional Director of a Non Governmental Organization known as National Democratic Institute, NDI, for Africa has made startling revelations recently on a Television interview that the ongoing Anglophone crisis has gone past the level at which decrees from a Government Minister can handle. According to him this crisis is more than one government can handle and drive it to its logical end. If the present situation continuous it would be terrible. When he DrFomunyoh looked at the list of men in uniform who have lost their lives it is telling not to talk of civilians overwhelming dead toll.

Focus now is on Presidential election and looking at the context with which the country is gagged between two major crisis thus Boko Haram in the North of Cameroon and the Anglophone crisis in the two English speaking regions, it necessitates that peace be ensured before any election. DrFomunyoh reiterated that the constitution makes provision for a delay in capital election in article 14 in case the country is caught in a grievous crisis. The said two crisis amount to enough reason to delay Presidential election by two or three months and have a peaceful environment good enough to ensure credible election. Some aspects of the constitution should not be revised only when personal interest is concern. Should those in charge push ahead and organize the election they risk two things either they win and would have a country to govern for lack peace or it would give credence to those clamoring for restoration to say election did not take place in their Regions which is prove that they are not part of the whole.

“Cameroonian people would judge each actor on the rule he or she played during this crisis. At the time I and others were proposing dialogue, the ears of the powers that be could only listen to the voices of those who opt for the use of brute force on the agitators.” He said. Looking at the role apportioned to the new MINAT Boss towards resolving the crisis rocking the two Regions. Dr. Fomunyoh retorted that Anglophones should not be mocked that it is the very person who at the onset of the crisis screamed at the top of his voice that there was no Anglophone problem and when he was appointed Minister of Territorial Administration, he sounded louder that Mr. Biya was too generous with Anglophones. Such persons who have lost credibility in the eyes of their people cannot be sent to go get the people back home.

The Senior Associate intimated that it is time people get to be more sincere and would not sit in their cozy offices calmly as if the country does not have a veritable crisis. He stated that living together is not a slogan and that living together is materialized in the acts that we pose on the people and the manner of talking to the people. They cannot want to bring back people to the house and at the same time giving instruction to go cause disorder and send troops to the field to brutalize more people to run away into the bushes. This total contradiction and that to him people have to re-examine themselves and assess whether the role they play is to bring back peace in the country. After the auto examination, they should create a platform where Cameroonians of goodwill can make their proposals on the way out of this crisis. Dr. Fomunyoh insisted that he cannot sit on television to spell out his ten points proposals because they are people out there who would attack the ten points without haven studied or mastered the document. To him there is need for a national dialogue and to say the Musonge Commission is already doing that, Dr. Fomunyoh lauded the job the commission and its members are doing in the field. That structure going by the articles of its creation was created to favour Bilingualism and hasn’t the vehicle to assemble the grievances of the people for possible solution. It is not its role and said if he has propositions to make so that the country should come out of the crisis, where should he table them? That is why he is insisting that there is need for a institution purposely for that and where Cameroonians of good will would forward proposals and be sure that their proposals are being integrated in a National reflection on a way out of this crisis. To him the decrees and orders coming from most authorities are not enough coupled with the fact that most of these authorities have lost legitimacy in the eyes of their people right in their villages. These are indicators that the country is going through a serious crisis which is claiming several human lives and warrants that serious and urgent measures be taken to ensure that people come out of this grievous crisis.

As it stands now in all the ten Regions of Cameroon each family must have lost a loved one in this crisis and some cases parents have buried their sons. What can a Minister tell an orphan whose father left in the morning in uniform and never came home? Many young people running away from the crisis get killed in high seas reasons why Cameroonians should reassemble and do something to resolve and come out of this situation if not the country would still be plunged in to more grievous situation that would be difficult to heal the hearts. Even if they stop shooting today there is a lot of work to reintegrate the people back to normal life.

Talking on those to be on the dialogue table, Dr. Fomunyoh did not blink to state it bluntly that those who were at the head at the time when the crisis started would be those to dialogue with. Head of Lawyers and the Teachers grievances and those who wrote severally to the Presidency on the same subject like the clergies what happened to them was most of them were arrested and locked up in Kondengui. The people turn to question whether one doesn’t have the right to ask for what are their rights are citizens in this country and out of fear of the unknown, most of them fled the country in to exile. When ManchoBibixy, the Journalist, led a manifestation in Bamenda, asking for amenities for better living condition for the people. He was asking for roads, water, electricity and proper management of the city. What did he get in return, he was rounded up and jailed which left many wondering as to what has become of their country where they no longer have a voice. Many of his followers escaped in to the Bushes. SisikuAyuk Julius Tabe and his group were moving from one country to the other in suit and tie talking on the Anglophone concerns and at the time Dr. Fomunyoh and others were concluding to begin talks with his group to pave the way for dialogue, they were whisked off to Yaounde and from then many youths were pushed in to radicalism and many deaths were registered. Before now these young people were doing it in hiding but today on social media girls like boy pose with their faces to the pubic calling on soldiers to come. With this situation to think that you sit in the office and sign decrees and send Musonge Commission to the field and the crisis would go away? That would be farfetched a wish.

Quizzed as to why he is not in a haste to yield to the people’s hope to run for President given his acumens on issues of governance. Dr. Fomunyoh said even if he were to run for the top job, it shouldn’t be on people’s blood reason why his stance is that there is need to put the Presidential election on hold and bring back peace before organizing any election. Were he to run with the present context it would be a total betrayal of the suffering masses and posterity to would judge him that he too was an accomplice to the mayhem that befell them.

<https://www.edennewspaper.net/anglophone-crisis-is-more-than-one-government-to-handle-dr-christopher-fomunyoh/>

1. **Bamenda Ghost Town Effect,  Military Wrecks Havoc, Accused Rapist Dragged To Military Court**

By Ignatius Nji

The traditional Monday ghost town which is being witnessed across the two English speaking regions in Cameroon, ushered in another gory face of alleged military brutality on the population and this time around  in the form of broad daylight rape of 17 year old girl in Bamenda. The Culprit by name Mbida Arthur was dragged to the military court to answer charges of rape and first appearance was next day Tuesday July 24.

The incidence is said to have taken place on the early hours of Monday 23, July at a filling station located at veterinary junction few meters away from the French cultural center in Bamenda. Defense Minister Joseph Beti Assomo has in a communiqué condemned in very strong terms the unruly act by this military officer by that act cannot go unpunished if found guilty.

According the victim’s narrative on a video that has gone viral on social media without the courtesy of protecting her sanctity, she (names withheld) said her mother had asked her to go get some watermelon from her parking store around veterinary junction.

On her way to the parking store a contingent of Police Elements stationed at that junction ordered her to come which she resisted and was bullied at to obey orders. Out of fear she went to them and a series of interrogative questions started pouring in as to why she was moving about and whether this little girl had an Identification card. When she answered in the negative on the premise that she was only 17 years, one of the Officers asked her follow another officer to where people without Identity cards are kept.

Sensing danger, the victim went on her knees begging them to let her go but was bullied at whether she sent them to Bamenda. Before she knew it the Police officer pulled her in to a room and asked her to remove her dresses which she resisted. This resulted to kicks from the Police officer and before long she was over powered and raped inspite her plea that she was a nursing mother. Her main worry is that she might have been infected with an illness since it rumored that most of these rapists are HIV carriers.

When the video went viral on social media, four of the Security Officers on a mix patrol are said to have invaded the premises of the French Cultural center and threatened the Director, Nana Ricardo, with a gun. He reported to the French Embassy in Yaounde and Northwest administration was notified. Without any waste of time all the military officers stationed at Veterinary junction were reportedly whisked off and taken in for questioning and other sources state that the rape victim was also called in by the administration to narrate her ordeal to help the investigation.

Human Right Journalist Gwain Colbert roaring in anger said many are those who suffer such treatment and go in to silence unnoticed. Since the advent of the ongoing crisis that has rocked the two regions, allegations abound as to girls being forced to exchange sex for security or freedom to go home.

<https://www.edennewspaper.net/bamenda-ghost-town-effect-military-wrecks-havoc-accused-rapist-dragged-to-military-court/>

1. **6,500 Jobs Lost  Due To Anglophone Crisis**

Following a spate of violence in Cameroon’s Anglophone regions which started since October 2016, the national inter-employers’ group conducted an investigation with companies operating in the areas.

Results published  13 September  showed that 86% of companies surveyed witnessed significant (36%) and very serious (50%) impact on business. The unrest has already cost CFA2.153 billion in real property, rolling stock and furniture while the turnover shortage is valued at CFA269.056 billion.

“*This shortage in business turnover implies an immediate loss of CFA5.9 billion in government’s tax revenues, as a deposit of corporate tax [the rate of which is set at 2.2% calculated on turnover]”,* Gicam pointed out.

In terms of job losses, agro-industrial companies are atop the list. Overall, nearly 8,000 jobs in the formal sector are threatened in addition to the 6,434 jobs already lost.

The group suggests to stabilize the security environment as to better control the situation and initiate peace restoring process across the country.

“*It’s urgent to stop the extension of the unrest to other areas and regions. Cases of company holdups by armed groups are already reported in Bonabéri [in Douala, the country’s economic capital],”* Gicam concluded.

To note that companies selected under this survey include those operating in agribusiness, local agro-industries, telecommunications, coffee – cocoa sector, agricultural services and distribution.

**2) Gabon To Export Crude Palm Oil To Cameroon**

Gabonese palm oil producers have offered to export their products to Cameroon to supply refineries, we learnt from sources at the trade ministry.

Back on October 27, 2016, the palm oil refinery in Awala (Gabon) made first exports to Cameroon. Since then, Cameroonian refiners several times purchased palm oil in Gabon, from where transport costs are cheaper than from Indonesia which is also a supplier.

After having long peaked at 100,000 tons per annum, Cameroon’s annual structural deficit in crude palm oil grew to 130,000 tons, due to higher investment by refiners while local production is stagnating.

Let’s mention that the strategy to increase Gabonese palm oil exports is part of President Ali Bongo’s plan to diversify their economy and make it less dependent on oil production.

**3)   Banana Exports Grow To 28,434 Tons**

Between August and July this year, Cameroon’s banana exports rose to 28,434 thanks to higher volume exported by Plantations du Haut-Penja (PHP), local subsidiary of Compagniefruitière de Marseille.

According to figures from the country’s banana association (Assobacam) the company exported 4,000 tons more in August, up from the 8,672 tons a month earlier, accounting for nearly 75% of export volume during the period.

Meanwhile, Cameroon Development Corporation (CDC), the market’s second-leading company, exported only 5,534 tons, including 4,046 tons exported in July. The reason of this poor performance is the current unrest in the South-West region where the company owns all its plantations. The market’s minor player Boh Plantations exported 1,967 tons of bananas (1,164 tons in August and 803 tons in July).

**4) Government Realises 52.31% Of Investment projects**

As at June 30 this year, the implementation rate of projects featured by the government investment budget stood at 52.31%, while the resources commitment rate was 58.69% and the resources liquidation rate was 54.55%. Cameroon’s national supervising committee of Public Investment implementation said after a meeting held September 7 in Yaoundé.

Compared to the same period last year, this translates into a decline in the implementation of Government-funded projects (centrally managed and assigned funds), both financially and physically.

Considering “internal resources”, the commitment rate as at 30 June 2018 was 54.75%, compared with 69.86% in 2017, thus a decline by 15.11 points; the liquidation rate was 47.14%, down from 66.90% in 2017 (-19.76 points). The projects’ physical implementation rate was 38.37%, down from 52.83% in the same period in 2017 (-14.46 points).

“There are companies with very low financial capacities. Then, once they secure contracts, they fail to fulfil terms because of their weak financial capacity,” said Isaac Tamba, Managing Director of Economy. “There are some contracts which were awarded before we noticed that the service providers did not have the technical capacity to carry out the works,” he added.

Cameroon’s State budget for 2018 is valued at CFA4,625.8 billion in commitment authorizations (CA) and CFA4,513.5 billion in payment appropriations (PA).

The total allocation for public investment is CFA1,403.8 billion in commitment authorizations and CFA1,291.5 billion in payment appropriations. Therefore, the government investment budget represents 28.6% of the State budget in payment appropriations, down from 36.3% in 2017 (-7.7 points).

**5) Afriland First Bank Claims Leadership of  Banking Sector**

Afriland First Bank reports a total balance sheet of CFA1,011 billion as at 30 June 2018, claiming to be the leading bank in Cameroon. This feat is, according to CEO Alphonse Nafack, linked to the bank’s market penetration strategy, its innovation and desire to change the country’s financial ecosystem.

“We have 742 employees, a strong workforce that justifies our performance. We intend to maintain our position and continue to innovate in the market,” says Alphonse Nafack.During the period under review, Afriland granted a total of CFA618 billion in loans. These credits were granted as salary advances, overdrafts, school loans, car and real estate loans.

Compared to the same period last year, the bank was listed as one of the five institutions, along with SociétéGénérale Cameroun, Ecobank, SCB and Bicec, that provided about 72% of bank loans, according to the Ministry of Finance. This means out of the CFA3,321.1 billion granted in June 2017, Afriland and the four other banks granted CFA2,391.19 billion.

**6) SMEs Capture Only 7.68% of Loans**

During the second half of 2017, SMEs operating within the CEMAC area captured only 7.68% of the CFA1,312.82 billion granted in loans by banks. This featured in the “Cost Statistics and Credit Conditions in CEMAC” report published by the Bank of Central African States (Beac).

During the period under review, private individuals absorbed 10.72 % of the loans while the largest share (76.63%) went to large companies. “84.26% of the disbursable loans provided during this period were short-term loans, while 13.49% were for mid-term and 2.25% for long term,” the document said.

SMES represent over 80% of CEMAC’s economic fabric.

**7) CEMAC Oil Production To Grow By 4.6%**

In 2018, oil production within the CEMAC area could increase by 4.6% to 45.2 million tons compared to 2017. This is revealed in an outlook report published in August by the Bank of Central African States (Beac).

In detail, Beac said that in the “extractive industries” sector, oil production is expected to increase in Congo (+18.1% to 15.7 million tons), Chad (+22.4% to 7.1 million tons) and to a lesser extent in Gabon (+1.5% to 10.7 million tons) and Cameroon (+1.3% to 3.6 million tons).

This higher oil production is also expected to raise budgetary revenues by about 7% to CFA9,030 billion, driven by improved hydrocarbon income (+31.3%, to CFA3,570.9 billion). The increase in hydrocarbon income will be drawn by a rise in crude oil prices per barrel (5.8%) and an appreciation of the euro against the dollar.

8) Fish Import Drops By 31.8%

It has been revealed that in 2017, Cameroon disbursed Fcfa114.3 billion to import 181,678 tons of frozen fish, the National Statistics Institute (INS) said. Compared to 2016, this figure reflects a decline by 23.4% in volume and 31.8% in value. Given that in 2013, the country imported 205,295 tons of fish for CFA144.2 billion, the downward trend is -5.6% in volume and -2.9% in value per annum over the period 2013-17.

Over the period under review, 50.6% of import came from African markets (mainly Mauritania and Senegal), while Europe (Ireland) provided 12.9% and Asia (China) 19.6%.

The institute said the import of frozen fish helps meet demand. For the record, the local production was estimated at 218,191 tons in 2016, +3% compared to 2015. To boost the sector, government plans the construction of sales halls, smoking rooms and wharves.

With regards to aquaculture promotion, Cameroon focused on improving the production of hatcheries and fish farms by mastering larval rearing and technical and economic management, as well as the dissemination cage aquaculture techniques, with support from FAO.

<https://www.edennewspaper.net/6500-jobs-lost-due-to-anglophone-crisis/>

# CPDM Senator Urges Biya To Personally Tackle Anglophone Crisis

**By Ignatius Nji**

Senator Chief Dr. Simon Anja Ngwo, from Akwaya reportedly took the rostrum at the Senate by storm with the question as to why the upper house has remained so silent on the aggravating crisis in the two Anglophone regions.  Standing out of the usual fear factor that characterize CPDM militants in the face of question hierarchy, Senator Chief Dr. Anja, questioned the House as to why can the President of the Senate not empowered by the House to go and meet president Paul Biya on the said issue.

According to the fearless Senator, the crisis is escalating every minute whereas several delegations have been sent to the regions and back yet the people have remained adamant. To him, it was time President Biya, should personally address the issue and lay it to rest. He challenged his peers at the upper house to make adequate use of the knowledge they have acquired over the years.

Hear him, “We are not using the knowledge that we have acquired, every one of us is well qualified. Why can we not put this knowledge in to proper use? Our President is here, can we not advise him to appeal to the Head of State to go talk personally to his people? Must it only be Anja or Mister this to go and talk? When we go and talk they don’t listen. If he himself stands out and be talking, people would be watching, looking at his face, hearing the type words he uses and the consoling statements that he makes and would see calmness and peace would reign.”

As father of the nation, he thinks the people would very much want to hear from him directly and not through third parties. And more to that administration is talking to the people. As a traditional ruler who is directly feeling the pinch of the crisis is worried that they at the senate are just sitting and doing nothing to have situation addressed. He questioned whether Senators are looking for a good or bad Cameroon and whether they don’t know God and whether a junior man can not advise a bigman.

Should the Head of State is advised to take up this challenge to talk to his people directly, there would be drastic change in the hearts of the people and should he turn it down then he Anja is sorry. The Senator from Akwaya made it clear that he is by this measure putting to rest his conscience should nothing be done and things continue the way they are unfolding. These third parties have all run out of the peoples’ trust and confidence reason why they turn a deaf ear to anything they go to say.

The Senator reiterated that there is no time to waste given the speed at which the events are evolving from bad to worse and should anything more difficult crops up tomorrow they of the upper house should be ready to share in the blame of neglect and not say they did not know.

The silence exhibited by Anglophone members of both the lower and upper houses is getting to the nerves of moderates. Since the outburst of Hon Wirba Joseph and subsequently Hon Simon Fobi Nchinda trying to draw Parliament’s attention to the crisis, all other Anglophones in the two houses have maintained sealed lips not excluding the SDF new team at the upper house.

Pundits are beginning to question whether they have not been compromised with positions and benefits within the House of Lords. At the swearing in, all Senators of Anglophone Regions had promised to reporters that their priority as they begin sessions is to have Anglophone crisis tabled for discussion with possible solutions. This pledge, six months into their mandate, the gentlemen and women are drown in business as usual while their people are wallowing in Refugee camps in Nigeria and some in the bushes while others are moving from town to town. The killings and razing of whole villages are the price the people must pay for asking for a good life.

It should be noted that as far back as 2015, Senator Chief Dr. Anja, started having a feeling of insecurity in his Akwaya Sub Division. As Chief of Bantakpa village one of the 99 villages that make up for Akwaya Sub Division, he drew the attention of the Minister of Defense severally to look in to porosity of the area given its closeness to Nigeria.

His fears at the time was directed towards the Boko Haram insurgents who can easily kidnap an appointed official like himself and ask for ransom, in the false hope that Senators in Cameroon have money like those of Nigeria. The government did very little in terms of security and in 2016 the outburst of the Anglophone crisis turned the place in to a no go area for most them. Because of insecurity, his people all moved out of the village in to Nigeria and some are in the bushes.

The Senator sent some financial resources to his people in bushes and in Nigeria and the money was turned down saying they want to come home. The Senator should plead with the powers that be to work for peace to return to the village for them to resume their

<https://www.edennewspaper.net/cpdm-senator-urges-biya-to-personally-tackle-anglophone-crisis/>

1. **European Union Urges Gov’t To Dialogue On  Anglophone Crisis**

**By Elivonne Bah ( UB student journalist On Internship)**

The European Union (EU) has raised serious concern about the continuing unrest in Cameroon’s Anglophone regions as the 2018 presidential election approaches. With less than a month to the election, the security of the population is at stake as these areas continue to witness daily gunshots, killings and abduction of persons.

This has created an unsafe environment for the population with many of them fleeing to safer zones in other Francophone towns. In Buea and Bamenda respectively, massive exodus of persons are being witnessed daily for the fear of the unknown before, during and after the election.

*“The acute and persistent violence in Cameroon’s South-West and North-West regions remains a serious concern, especially for the presidential election of October 7,”* the union said on 13, September during the 39th session of the United Nations Human Rights Council.

The body has strongly condemned *“any use of violence against civilians and States representatives,”* and called on authorities to protect the population, stressing that the use of force by State agents must be proportionate.

According to EU, a sustained solution to this crisis can only be achieved through dialogue whereby all concerned parties are constructively committed. It suggests that the government and armed groups grant unimpeded access to humanitarian actors in need of “impartial and thorough investigations into alleged human rights violations and actual human rights violations”.

The EU however revealed that it is committed to support all efforts directed towards a peaceful solution to the conflict that has been ongoing since October 2016.

However authorities in the two regions have assured the population to remain calm as necessary measures have been put in place to ensure their safety and security.

<https://www.edennewspaper.net/european-union-urges-govt-to-dialogue-on-anglophone-crisis/>

# How Only Negotiations, Not Dialogue, Can End The Anglophone Crisis

**By Colbert Gwain**

This reflection is inspired by the fact that as British Consul, Hewlett took all his time dragging feet in Lagos rather than quickly coming over to Douala to sign agreements of ownership of Cameroon with the Douala Kings and by the time he arrived the Germans had already done the deal. Government’s feet dragging over inclusive and genuine dialogue with agitating Anglophones has made any initiative for dialogue now too late and too little.

It is the more informed by the fact that by nature,  dialogue seems to be more efficient in preventing conflict than in resolving it and now that the crisis escalated into an ‘I will show you that I am more than you level’, only negotiations rather than dialogue can be an appropriate tool in putting an end to the crisis.

It is also inspired by the fact that although dialogue has become the buzzword in Cameroon since the start of the Anglophone crisis, what we have seen more, has been what Peterkins Manyong of The Independent Observer newspaper, in his Dictionary of New Deal terms, refers to as ‘dialog’ instead of dialogue and that even the dialogue as propanded today cannot,  and I mean, cannot carry the burden of conflict resolution.

Point is, if inclusive, genuine,  and frank dialogue was actually called at the time the UN recommended, this crisis would not have escalated to this level. Since Cameroon authorities, in their usual lacklustre manner, mistakenly thought things would just work out as has obtained in the past, they toyed around with the idea. They spent time talking about how all problems can be resolved by dialogue rather than actively dialoguing. All the power of action was lost in the energy of the resolve.

When government ministers went to the North West and South West regions for what they called ‘dialogue’, they spent time doing ‘dialog ‘, that is, a situation where government functionaries drive in from Yaounde in their posh cars, take up rooms in Ayaba hotel; invite one group of like-minded people after another; bring them greetings from the Head of State, tell them violence is not good and that they need to show patriotism now more than ever before; read out a final communique they prepared from Yaounde; and finally request each of the participants to pass through a certain room and collect brown envelopes for transport. Yaounde ‘s understanding of dialogue is that they speak and you listen,  no room for debate. At the end, when they announce that each participant would have some transport,  that’s when they pretend to ask whether anybody had something to say, knowing fully well that nobody would want to compromise his/her transport.

Truth be told. Since the start of the crisis in 2016, the government of President Paul Biya has exhausted all its dialogue or dialog strategies and initiatives. Nothing more is left of it. That’s why the new narrative now should be about Negotiations no longer dialogue.

Dialogue is generally defined as an exploration of an idea, a concept, or a goal by a group of people that is aimed at gathering information, not necessarily coming to a decision of any kind. Those who have been watching what Cameroon government since termed dialogue trips to Bamenda and Buea respectively would conclude that their aim was just to gather information and present to someone somewhere. All what the Prime minister and other members of his government who have made trips to the South West and North West regions, has been what could be called internal dialogue,  that is, a situation where they spent time talking to themselves about themselves.

**Negotiations Or Meditation**

Although linguists would quarel about the intertextuality of dialogue and negotiations, I make bold to declare that at this stage of the conflict, dialogue cannot carry the burden of the conflict. Only Negotiations or mediation can do.

Unlike dialogue that has just outlived it’s usefulness in the resolution of the Anglophone conflict, experts in conflict resolution would tell you that only Negotiations or mediation can put an end to the Anglophone crisis.  Why? In negotiations, parties agree to work with one another in the resolution of the conflict. Sometimes, talking to one another directly is not the best solution. In this case, mediation, no longer negotiations, is preferred. In mediation, parties agree to work together but under the guidance of a trained mediator, I mean, trained mediator. Why dialogue can no longer work in the resolution of the Anglophone crisis is because communication between the two conflicting parties have been seriously, I mean, seriously impaired. A trained mediator in the manner of the late Koffi Annan, can be really helpful in guiding the conversation in a positive manner.

**Like The Abu & Muteff Of Kom**

Take me as a fool for saying it’s too late Hewlett to dialogue as a solution to the Anglophone crisis. Recall that it was the same arrogant thinking Abuh village in Fundong Subdivision had when Muteff, then a quarter under the larger Abuh requested it’s share of respect. By then, Muteff only wanted Abuh village authorities to grant them a junior section of the Primary school on grounds that the lack of a solid bridge linking Muteff to Abuh resulted in their children drowning when going to school.

Like Yaounde authorities in the case of the Anglophone crisis,  Abuh traditional authorities out rightly and arrogantly refused to dialogue,  claiming that Muteff was too small to have a voice. Muteff parents originally reacted by withdrawing their children from Abuh CBC school for three years. When it dawned on them that Abuh was adamant, they went ahead to create a community school. Abuh still saw it as a big joke and continued to toy with the urgency of dialogue even when neighbouring villages and other concerned Kom elites advised to the contrary.

Since it was a tradition in Kom that each village hunts game annually for the Fon, the self proclaimed autonomous village of Muteff went ahead to organise their own annual hunt for the palace. Instead of countering the move by joining in the annual hunt, Abuh village insisted to stay back thinking that since the Fon does not know any village as Muteff, the hunt would be registered on the count of Abuh. When the Fon summoned Abuh authorities to explain why they did not participate in the annual hunt, no explanation was volunteered by Abuh 2nd Class Chief. As if that was not enough, and given that each autonomous village in Kom had an obligation to construct or maintain its village house in the Palace, when Abuh village noticed that Muteff was constructing a house in the Palace, they still concluded since Muteff was a quarter under them, the house would count for theirs. To their greatest surprise, when Muteff completed the structure, they went ahead to encrypt the name Muteff Kom to it.

The Fon summoned Abuh authorities for explanation and they did not care to volunteer any. That angered the Fon and he allowed the Fundong D.O to grant Muteff autonomy from Abuh. It was only when the D.O wrote to the Abuh village head that he was coming to install a traditional council in Muteff that scales fell off from their eyes and they started rushing helter-skelter for dialogue with Muteff but it was too late.

Not that the same could be said of the current Anglophone crisis. Only that one thing leads to another as obtained in the Muteff situation: Schools boycott; self declared autonomy; armed groups; curfews, and you name them. I drink Natang that if negotiations are not engaged and fast, many more unpleasant surprises can befall Cameroon the same way they be fell Abuh in the 70s.

Like The Abu, Muteff Of Kom

<https://www.edennewspaper.net/how-only-negotiations-not-dialogue-can-end-the-anglophone-crisis/>

# Gov’t steps up crackdown on activists as Anglophone crisis escalates

**By Fon Gilbert in Yaounde**

Yenika Jude: Fleeing repression

As the crisis that has been rocking the North West and South West regions, which has spiraled into an armed conflict, rages on, the government has stepped up its crackdown on all those suspected to be activists or sympathisers to the Anglophone cause.

In this light, security operatives have been indiscriminately arresting Anglophone activists and suspected activists. This has caused many of them to flee into hiding and the whereabouts of many is not known.

Sources say the arrested activists are being tortured and detained under horrendous and inhuman conditions. Some have reportedly died in detention.

It is worth recalling that the Anglophone crisis, something that pundits say had been brewing for several years, boiled over in October 2016 when Common Law Lawyers in the North West and South West regions went on strike, paralyzing the courts. They were demanding for a return to the federal system of government, redeployment of Civil Law Magistrates back to Civil Law Courts among other grievances. Not long after, teachers in the North West and South West regions also went on strike, demanding the redress of several issues concerning the English sub-system of education.

Things got worse when concerned citizens in the North West and South West regions, who had been fed up with the unfavourable political and especially economic stagnation of Cameroon at large, but more importantly in these regions, joined the strike.

But after negotiations with the teachers and lawyers ended in deadlock, the government banned the Southern Cameroons National Council, SCNC, and the Cameroon Anglophone Civil Society Consortium, CACSC. Some of the leaders of the Consortium such as Barrister Felix Agbor Nkongho and Dr. Fontem Niba were immediately arrested while others such as Barrister Bobga Harmony and Tassang Wilfred fled into hiding.

But as the crackdown on the activists escalates, several cases have been reported.

One of such cases is that of Yenika Jude Yongye, a young southern Cameroon activist who is reported to have gone underground for fear of being arrested.

He is reported to have arrived Cameroon on September 11, 2019 after spending over three years in Belgium, from where he was actively involved in the struggle for the Independence of the state of former southern Cameroon now being referred to as Ambazonia.

Upon his arrival in Bamenda, his place of origin, security forces, we gathered immediately launched a manhunt to trap him down. Following a hint, Yenika Jude is said to have fled the town for safety. His exact whereabouts has since remained unknown though we gathered he might have moved to a neighboring country.

Yenika’s activism dates back to several years. In 2016 before leaving Cameroon, we gathered that he was amongst a group of young Southern Cameroon National Council, SCNC members who had organized several meetings in Bamenda to front the restoration of the statehood of Ambazonia. He has since been targeted for arrest. Yenika Jude was reportedly listed amongst other young southern Cameroon activists targeted for arrest including Njofri Belmond, Wayula George.

It would be recalled that leaders of the Anglophone separatist movements including Sisiku Ayuk Tabe and nine others, who were arrested in Abuja, Nigeria in January 2018 and later extradited to Yaounde were in August 2019, handed life jail sentences.

It is worth noting that many people, both civilians and security forces, have been killed in the crisis, many more internally displaced and over 30,000 have fled to neighbouring Nigeria where they are living as refugees.

While the Anglophone crisis continues to escalate, International Organisations and other Western powers have called on the Government to address the root cause through dialogue.

<https://www.edennewspaper.net/govt-steps-up-crackdown-on-activists-as-anglophone-crisis-escalates/>

1. **Businessmen suffer big losses as Anglophone crisis rages on**

By Pontinus Ekang in Bamenda

As the crisis rocking the North West and South West regions, which has spiraled into an armed conflict rages on, businessmen have particularly been feeling the pinch.

As the conflict persists, businesses have severally been attacked with hostages taken.

The economy of the troubled English-speaking regions is slowly grinding to a halt as the long drawn-out crisis is forcing some local businessmen to put their safety over commerce.

Restrictions of the movement of people and goods have worsened the already deteriorating situation for businessmen. Armed secessionists called “Amba Boys” mount intermittent road blocks on-and-off along major highways in the troubled area.

The conflict has also been marked by the disruption of essential utility services, especially the supply of electricity and network interruptions to telecommunication services by the government. Internet services were cut off for 136 days between October 2017 and February 2018.

A Bamenda-based businessman, Ngwa Pius, said “the business environment has become extremely hostile.” He said sales have dropped and he no longer feels safe being in Bamenda.

On at least two occasions, Amba Boys have visited me requesting for groundnuts (cartridges for Dane guns) or money to support the struggle,he added.

At most markets, traders have been complaining of a huge drop in their normal turnover.

With especially the ghost town operations which also affects travels, many aspects of commerce have been hard- hit. This includes inter-urban transporters and elsewhere.

Our big customers are traders and so when there is slowdown in their economic activities, we are automatically affected,one transporter told us.

Many business persons have been caught in the web between the military and Ambazonia fighters. While the military accuses businessmen and women who close their shops on ghost town days of siding with the separatists, the fighters are threatening and sometimes attacking those who open their shops during ghost towns, indicting them for being traitors against what has come to be referred to as the Anglophone struggle.

Businessmen who have suffered because of this crisis include Francophones, Léopold Serges Kamta Dioupi, Nicanor Mangeda, forced to leave the restive region for fear of reprisals.  Sources say their shops were set ablaze after they were accused of betraying the Ambazonia fighters.

When the crisis began, the intelligence network of the Ambazonia separatists are said to have suspected Nicanor Mangeda of colluding with the government forces in Yaoundé because he is French-speaking.

He was thus reproached for denouncing the separatists to the authorities.

In July 2017, his house was set on fire by the secessionists. He lost his son and business premises worth 20 million FCFA in the fire incident.


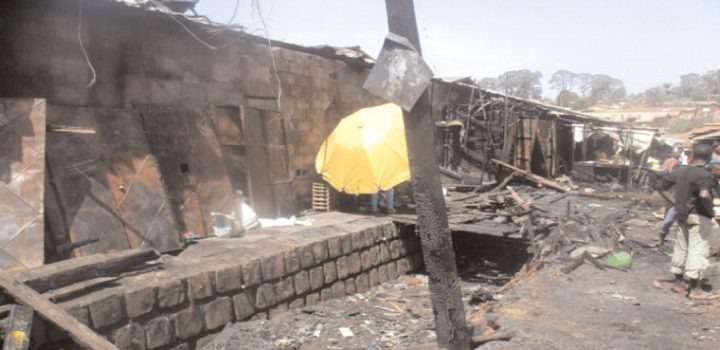

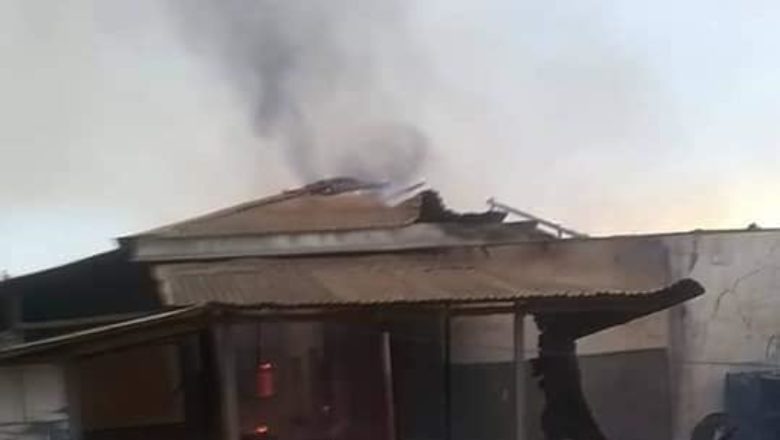
Shops burnt by Ambazonia fighters

Meanwhile, a few months later, even though he had not yet finished recovering from the fatal blow, it was this time the turn of the agents of the government secret services that harassed him, tagging him a “traitor” on the grounds that he was working with the separatists.

Since then, Léopold Serges Kamta Dioupi and Nicanor Mangeda were forced to flee from the regions.

In the meantime, Serges Kamta, who hails from the West region, but lived and grew up in Bambui in the North West region, where he is responsible for a family and invested all his fortune also suffered blackmail and pressure of the secessionists.

Owner of a large shop, in 2017 he received a call from an unknown number with the caller asking him in Pidgin English to make a gesture to support the secessionist fighters who are fighting in the bush for the restoration of the state they have christened Ambazonia.

According to the fighters “members of the Diaspora like Leopod Serges Kamta Dioupi live well in Europe as they (the combatants) fight for the cause of all”.

After receiving several threatening calls to kidnap his family members and set fire on his shop if he did not contribute financially to the fight, the secessionists went ahead to burn down his house, cars  and business premises.

We learnt that the separatists said as a traitor he had to be treated as such and that he will be hunted out even if he comes to Cameroon. His family has migrated over to Douala where they are said to be seeking refuge.

He has been receiving threats from the separatists on one hand for not supporting and also the government accusing him of sponsoring the Ambozania movement.

All of these, his family say has scared him from coming to Cameroon for fear of being arrested by government or being killed by the separatists.

It would be noted that businessmen and other personalities in the restive regions no longer complain to the defence security forces when they receive threats from secessionists.  A majority prefer give in to their threats by sending them money to avoid being kidnapped and even murdered.

This is why the separatists-imposed ghost towns are always respected by people who do not know which way to go.

<https://www.edennewspaper.net/businessmen-suffer-big-losses-as-anglophone-crisis-rages-on/>

1. **Diaspora Ambazonia Activists Faulted For Masterminding Kumba School Massacre**

**By Johnson Mbu**

Some Diaspora Ambazonia activists have been blamed for masterminding the recent shooting in a school in Kumba, Meme division of the South West region, which lead to the death of seven students and several others injured.

This is contained in letter with subject “Report/Findings on the incident/Massacre that occurred on 24 October 2020, at the Mother Francisca International Bilingual Academy School Complex in Bamileke Street, Fiango, Kumba, Meme Division, South West Region, Cameroon”, sent by the Minister of Territorial Administration, Paul Atanga Nji, to the Minister of State, Secretary General at the Presidency, Ferdinand Ngoh Ngoh. The letter, a copy of which this reporter has seen, says the findings were done on the instruction of the Head of State, relayed by Prime Minister, Head of Government.

The letter stated that: “…on the 24th of October 2020 around 11 a.m. a Private School/College Mother Francisca International Bilingual Academy School Complex located at Bamileke Street, Fiango, Kumba, Meme Division, South West Region, Cameroon, was attacked by a group of 9 separatist fighters who came in on 3 motorcycles. The assailants were heavily armed with sophisticated weapons like AK47 and homemade rifles and opened fire on the students present in the classrooms, killing 6 on the spot – 1 boy and 5 girls”. It also said several other students were critically wounded in the attack and are receiving treatment at the Kumba district hospital, Manyemen Annex Hospital Kumba and Mutengene hospital.

Meanwhile, it disclosed that an analogue phone, believed to belong to one of the separatist fighters, was found at the scene of the crime.

The letter said in the course of investigating the Itel 5081 phone, it was discovered that it had been in recent communication with telephone number +1 206-659-9939 tied to James AsangaWaseh. The said James AsangaWaseh, it was disclosed, “is a Cameroonian with Cameroon passport No. 089543 based in the USA, a strong promoter and an activist/secessionist who has been on our watch list and working closely with separatist fighters in Cameroon”.

Waseh, the letter said, was spotted during a demonstration on 5 August 2017 in Brussels, Belgium, harassing and brutalizing the Minister of Justice, Laurent Esso, who was on special mission to dialogue with Anglophones in the Diaspora.

In the letter to the Secretary General at the Presidency, Minister Atanga Nji suggested that one of the means to bring the crisis to an end is to target Cameroonians living abroad and fueling the armed conflict by compelling their brothers and sisters back home to carry out “such malicious killings”.

He said such Cameroonians should be tracked down and repatriated to Cameroon to face the law. Some of them which he listed include; James AsangaWaseh (USA), Samuel IkomeSako (USA), Eric TatawTano (USA), Mark Bareta Bara (Belgium), Ayaba Cho Lucas (Norway), Tapang Ivo Tanku (USA), John Bechu (Sweden), Chick Fon Levi (Sweden) Ngwa Otto (Austria), Prince Joshua Carl (Denmark), Erica Akaba (Belgium), Paul Nilong (Germany), Clovis Nanchop (Germany), Verla Franklin (USA), Caroline Mala (Morocco).

It should be noted that if these persons are repatriated to Cameroon they will be tried in a military tribunal under the anti-terrorism law whose maximum penalty is the death sentence.

Since the armed conflict started in the North West and South West regions at least 3,000 people have been killed according to early 2020 statistics by the United Nations.Many more have been internally displaced and over 30,000 have fled to neighbouring Nigeria where they are living as refugees.

**Origin of Anglophone crisis**

The Anglophone crisis, something that pundits say had been brewing for several years, boiled over in November 2016, when Common Law Lawyers in the North West and South West regions went on strike. They were demanding for the return of the federal system of government, redeployment of Civil Law Magistrates back to Civil Law Courts in French Cameroon, among other grievances. Not long after, teachers in the North West and South West regions also went on strike, demanding for the redress of several issues concerning the English system of education.

Things, however, got worst when Anglophones in both regions, who had been fed up with the unfavourable political and economic situation of the country, the use of French as the dominant and official language, and the marginalisation of the Anglophones, joined the strike.

The strike was met with brutal repression by the military, with many killed, some injured and several others arrested. The crisis later morphed into an armed conflict.

It should be recalled that a leading figure in the Ambazonia fight for independence, Sisiku Ayuk Julius Tabe, and eight other close associates were arrested in Nigeria in January 2018. They were later extradited to Cameroon and detained incommunicado for several months after which they were tried in a military tribunal and sentenced to life imprisonment.

While the Anglophone crisis continues to escalate, international organisations and other western powers have called on the Cameroon government to address the root cause.

<https://www.edennewspaper.net/diaspora-ambazonia-activists-faulted-for-masterminding-kumba-school-massacre/>

1. **Armed conflict in NW, SW causes many to flee for safety**

**By Kowac K.K. Bandolo**

As the crisis in the North West and South West regions, which has spiraled into an armed conflict, rages on, many people are fleeing for safety as their lives have been in danger.

While the Ambazonia separatist fighters have been targeting anybody whom they consider to be “blacklegs” or “traitors” of their independence armed struggle, the government, on its part, has stepped up crackdown on all those suspected to be activists or sympathisers to the Anglophone cause.

Security operatives have been indiscriminately arresting activists and suspected activists. This has caused many of them to flee into hiding and the whereabouts of many is not known.

Sources say the arrested activists are being tortured and detained under horrendous and inhuman conditions. Some have reportedly died in detention.

A case of an Anglophone activists who is reported to have fled because her life was in danger is Ngoe Bembi Mireille Nyama, a university graduate who left Buea in Fako division and went back to her hometown of Bole, a small locality in Meme division of the South West region, and was operating a restaurant business.

She later joined one of the movements fighting for the liberation of Anglophones, Southern Cameroons National Council, SCNC, and rose to become Organising Secretary in her hometown.

Because of Ngoe Bembi Mireille’s activism, many Ambazonia fighters used to eat and drink in her restaurant. Meetings of separatist fighters, we gathered, were also usually held in her restaurant.

The military had also been deployed to the area to crack down on the separatists. In the course of the military deployment in the area, one of the soldiers is said to have fallen in love with Ngoe Bembi Mireille. While a relationship between the two of them was still in gestation, the separatist fighters launched an attack on the military camp, an attack which led to the killing of some soldiers and many others wounded.

The military later suspected that Ngoe Bembi was the one who sold them out to the separatist fighters. She was summoned, but because of fear she did not show up. Nonetheless, she was later caught and seriously tortured after which she was hospitalised because of the injuries she sustained of the beatings by the soldiers.

Meanwhile, when she was still in the hospital another summons was reportedly sent to her but she could not respect it because she was still nursing her wounds. Not long after, we gathered, a warrant of arrest was issued for her.

Thereafter, Ngoe Bembi Mireille Nyama is said to have vamoosed and her whereabouts remains unknown. We gathered that their family homes in Bole and Mbonge were burnt down, while her parents, two younger sisters and her sister’s son escaped into the bushes.

If arrested, Ngoe Bembi Mireille Nyama will be charged for conspiracy to murder, violence or insurrection and terrorism and will be tried in a military tribunal under the anti-terrorism law whose maximum sentence is the death penalty. That is if she is not killed outright like others who have been victims of extra-judicial killings.

**Origin of the crisis**

The Anglophone crisis, something that pundits say had been brewing for several years, boiled over in 2016 when Common Law Lawyers in the North West and South West regions went on strike, paralyzing the courts. They were demanding for a return to the federal system of government, redeployment of Civil Law Magistrates back to Civil Law Courts among other grievances. Not long after, teachers in the North West and South West regions also went on strike, demanding the redress of several issues concerning the English sub-system of education.

Things got worse when concerned citizens in the North West and South West regions, who had been fed up with the unfavourable political and especially economic stagnation of Cameroon at large, but more importantly in these regions, joined the strike.

But after negotiations with the teachers and lawyers ended in deadlock, the government banned the Southern Cameroons National Council, SCNC, and the Cameroon Anglophone Civil Society Consortium, CACSC. Some of the leaders of the Consortium such as Barrister Felix Agbor Nkongho, president of Fako Lawyers Association, FAKLA, and Dr. Fontem Niba, Secretary General of SYNES UB were immediately arrested while others such as Barrister Bobga Harmony, president of North West Lawyers Association, NOWELA, Nalowa Bih, and Tassang Wilfred, Executive Secretary of Cameroon Teachers Trade Union, CATTU, fled into hiding.

It should be noted that leaders of the Anglophone separatist movements including Sisiku Ayuk Tabe and nine others, who were arrested in Abuja, Nigeria in January 2018 and later extradited to Yaounde are currently serving life sentences at the Kondengui maximum security prison.

It is also worth noting that many people, both civilians and security forces, have been killed in the crisis, many more internally displaced and over 30,000 have fled to neighbouring Nigeria where they are living as refugees.

While the Anglophone crisis continues to escalate, International Organisations and other Western powers have called on the government to address the root cause through dialogue.

<https://www.edennewspaper.net/armed-conflict-in-nw-sw-causes-many-to-flee-for-safty/>

1. **Gov’t Faults Diaspora Ambazonia Activists For School Massacre, Torture & Burnings**

**By Brian Fomukong**

  The government of Cameroon has accused some diaspora Ambazonia activists and sponsors for the recent attacks on schools in the South West Regions.

  Since the resumption of school for the 2020/2021 academic year last October 5, the security of pupils, students and teachers have been in high risk after several threats of lives for not respecting the “no go school call”  trumpeted by some separatist fighters and their sponsors fighting for the restoration of Southern Cameroons now being called “Ambazonia”.

  In two separate attacks on schools recently, students have been killed, tortured and others stripped naked by alleged separatist fighters while leaving some severely injured.

  A case in point is that of Mother Francisca International Bilingual Academy School Complex in Bamileke Street, Fiango, Kumba, Meme Division, South West Region where suspected armed separatists stormed the school on October 24, 2020 killing seven school children with six dead on the spot and the other one later in a hospital hospital in Mutengene with many others injured.

  After this barbaric incident, the government in a letter with subject “Report/Findings on the incident/Massacre that occurred on 24 October 2020, at the Mother Francisca International Bilingual Academy School Complex in Bamileke Street, Fiango, Kumba, Meme Division, South West Region, Cameroon”, sent by the Minister of Territorial Administration, Paul Atanga Nji, to the Minister of State, Secretary General at the Presidency, Ferdinand Ngoh Ngoh. The letter, a copy of which this reporter has seen, says the findings were done on the instruction of the Head of State, relayed by Prime Minister, Head of Government.

  The letter stated that: “…on the 24th of October 2020 around 11 a.m. a Private School/College Mother Francisca International Bilingual Academy School Complex located at Bamileke Street, Fiango, Kumba, Meme Division, South West Region, Cameroon, was attacked by a group of 9 separatist fighters who came in on 3 motorcycles. The assailants were heavily armed with sophisticated weapons like AK47 and homemade rifles and opened fire on the students present in the classrooms, killing 6 on the spot – 1 boy and 5 girls”. It also said several other students were critically wounded in the attack and are receiving treatment at the Kumba district hospital, Manyemen Annex Hospital Kumba and Mutengene hospital.

  Meanwhile, it disclosed that an analogue phone, believed to belong to one of the separatist fighters, was found at the scene of the crime.

 The letter said in the course of investigating the Itel 5081 phone, it was discovered that it had been in recent communication with telephone number +1 206-659-9939 tied to James AsangaWaseh. The said James AsangaWaseh, it was disclosed, “is a Cameroonian with Cameroon passport No. 089543 based in the USA, a strong promoter and an activist/secessionist who has been on our watch list and working closely with separatist fighters in Cameroon”.

  Waseh, the letter said, was spotted during a demonstration on 5 August 2017 in Brussels, Belgium, harassing and brutalizing the Minister of Justice, Laurent Esso, who was on special mission to dialogue with Anglophones in the Diaspora.

  Same scenario though not mentioned in the letter is alleged to have occurred in South Africa when then Minister of Special Duties Dion Ngute now Prime Minister visited  South Africa on same mission but met with stiff resistance and violent attacks from some Cameroonians notably Milan Atam, Emmanuel Muzang and Cletus Suh amongst others.

  In the letter to the Secretary General at the Presidency, Minister Atanga Nji suggested that one of the means to bring the crisis to an end is to target Cameroonians living abroad and fueling the armed conflict by compelling their brothers and sisters back home to carry out “such malicious killings”.

  He said such Cameroonians should be tracked down and repatriated to Cameroon to face the law. Some of them which he listed include; James AsangaWaseh (USA), Samuel Ikome Sako (USA), Eric TatawTano (USA), Mark Bareta Bara (Belgium), Ayaba Cho Lucas (Norway), Tapang Ivo Tanku (USA), John Bechu (Sweden), Chick Fon Levi (Sweden) Ngwa Otto (Austria), Prince Joshua Carl (Denmark), Erica Akaba (Belgium), Paul Nilong (Germany), Clovis Nanchop (Germany), Verla Franklin (USA), Caroline Mala (Morocco), Emmanuel Ndakwe Muzang (UK),Bernard Konfor (UK), John Mbah Akuroh (UK), Tangwan Wallace Ndi (Germany), Milan Atam (SA),Suh Cletus (SA) and Ndongmo Mekeuwa Armel (On the run).

  Barely 9 days after the Kumba attack as the government and various education stakeholders were still trying to overcome the despicable massacre in Kumba, another school this time around in Limbe, Fako Division, South West Region was attacked on Wednesday November 4, 2020.

  Though no dead was recorded, the students and teachers on campus that unfortunate day were given snake-beatings and stripped naked by the alleged separatists.

   In a viral video shot by one of the gunmen who introduced himself as “Slido”, the attackers gathered the students and teachers on campus that early school period in one classroom, stripped them naked,  gave them snake-beatings and set ablaze some the school  classrooms and offices before letting the victims to take on their heels naked.

   To “Slido” seen in the video holding an artisanal pistol and a gallon of petrol, the burning of the classrooms and offices is in their quest for school boycott trumpeted by separatists since the evolution of the Anglophone crisis in 2017.

  Still in the video, the uniforms of the students as well as their bags, books and other school materials can be seen littered on the floor in one of the classrooms.

   One of the gunmen could be heard in the video threatening to burn the students.

“Give me a gallon of petrol. I will burn all these students”, the voice could be heard.

  As he approached the students they had stripped naked, the gunman said “do you want to go to school?”

 The students cried and forced their way out of the class, as fire is set. One of the gunmen fires a shot into the air and orders the students and teachers to run for their lives.

 These and many more attacks on schools, lives of security officials and civilians according to the government are perpetrated and sponsored by these activists mentioned above and have this has caused damaging effects on the socio-political life of the people in these areas and the country at large.

  It should be noted that if these persons mentioned above are repatriated to Cameroon they will be tried in a military tribunal under the anti-terrorism law whose maximum penalty is the death sentence.

  Since the armed conflict started in the North West and South West regions at least 3,000 people have been killed according to early 2020 statistics by the United Nations. Many more have been internally displaced and over 30,000 have fled to neighbouring Nigeria where they are living as refugees.

<https://www.edennewspaper.net/govt-faults-diaspora-ambazonia-activists-for-school-massacre-torture-burnings/>

1. **Activists in big trouble as Gov’t intensifies crackdown**

By Sandra Lum

The Anglophone crisis that started with the Common Law Lawyers and Anglophone teachers taking to the streets on a peaceful demonstration decrying the marginalisation of the Anglophones better still Southern Cameroons in 2016 gradually morphed into an armed conflict and went bloody claiming thousands of lives, razing over 200 villages, and producing over 730,000 Internally Displaced Persons, IDPs. In the midst of these, the live of those proponents of the numerous peaceful demonstrations including the famous September 22, 2017 against the continuous detention of some of the inhabitants of the regions, and the celebration of the controversial Southern Cameroon independence day on October 1 remains in great danger.

Some of these alleged activists who are in the military dragnet and are reportedly on the run include Tiko-based Angu Kevin Ambe, Kumba-based Lawyer Okole Dyana, Mbengwi-based Aliba Manga Voilet and North West region-based Ngwa Dominic amongst other.

Anyone caught in line with any of these demonstrations, is immediately considered a terrorist by the Cameroon Government and numerous trump up charges, including but not limited to propagation of false information, rebellion, revolution, secession insurrection and non -possession of National Identity card, levelled against him.

This was the case with human rights lawyer-Felix Agbor Balla, University Lecturer-Dr Fontem Neba and journalists like Mancho Bibixy and Penn Terence, who were arrested in January 2017, brought before the military tribunal for adjudication, and subsequently stood trial before the military tribunal to bear the brunt of a failed system.

Many Anglophones have also been apprehended in various military and security check points, after their phones were searched and discovered therein messages, videos, pictures and images of the killings of Cameroon Military by Ambazonian Defence Forces, ferried and placed incommunicado in draconian inhumane detention conditions. Cameroon which was praised internationally as one of the most peaceful countries in the world, is now struggling to cope with untold causalities from what many qualify as an unrelenting and insidious conflict.

As tension rages on for close to a year in the restive North West and South West regions, several calls have been made for all protagonists to embrace peace for a better and new Cameroon, but things seem to have fallen on deaf ears as the armed conflicts between the separatist fighters and the defense forces rages on with multiple deaths recorded on both sides and houses razed to the ground, and villages burnt down, while Internally Displaced Persons, IDPs, keep increasing.

The government over the years is sparing no effort at tracking down those they consider agents of the destruction of Cameroon with secessionist tendencies. They still considering the fighters and activists as terrorists with numerous trumped up charges levelled against them such as propagation of false information, rebellion, revolution, secession, insurrection and non-possession of national identity card. Even those abroad considered as activists and preaching against the marginalisation of Southern Cameroons by the Yaoundé regime have equally been declared enemies of the State of Cameroon, and have been tagged for persecution.

At press time, the search for these alleged activists and many others had increased. Report of a survey released by a group of Human Rights Organisations in Cameroon indicates that the lives of activists of Anglophone extraction are now in danger.

<https://www.edennewspaper.net/activists-in-big-trouble-as-govt-intensifies-crackdown/>

1. **Armed Conflict In NW, SW:**

**Many Flee As Gov’t Steps Up Crackdown On Suspected Separatists, Sympathisers**

By Cynthia Bakoma

While the crisis that has been rocking the North West and South West regions, which has spiraled into an armed conflict, rages on, the government has stepped up its crackdown on all those suspected to be activists or sympathisers to the Anglophone cause.

Family members of separatist leaders have also being arrested and detained.

In this light, security operatives have been indiscriminately arresting Anglophone activists, suspected activists and separatist sympathisers. Sources say the arrested persons are being detained under deplorable and inhuman conditions. Some have reportedly died in detention.

This has caused many of them to flee into hiding and the whereabouts of many is not known.

One case is that of Nkah Lucien, an alleged sympathizer and promoter of secessionist activities. He has been accused of speaking against the government and propagating secessionist activities. Nkah Lucien is said to have been distributing flyers and posters in the market places, schools and other gatherings carrying secessionist propaganda.

He has been accused of supporting Sisiku Ayuk Tabe Julius and other separatists in their quest for the independence of the North West and South West regions to become a country they have christened Ambazonia.

Nkah Lucien was arrested, tortured and detained under horrible conditions at the central police station in Limbe, Fako Division of the South West region. He was, however, later released on bail and warned to desist from secessionist activities.

Nonetheless, he is said to have continued carrying out such activities. It is for this reason that Nkah was arrested again and detained in Limbe. However, while arrangements were being made for him to be transferred to Yaounde, he escaped from detention. His whereabouts is not known.

If arrested, Nkah Lucien will be tried in a military tribunal, under the anti-terrorism law, whose maximum punishment is the death sentence. That is if he is not killed outright, like many others who have been victims of extrajudicial killings.

**Origin of Anglophone Crisis**

It should be recalled that the Anglophone crisis, something that pundits say had been brewing for several years, boiled over in 2016, when Common Law Lawyers in the North West and South West regions went on strike. They were demanding for the return of the federal system of government, redeployment of Civil Law Magistrates back to Civil Law Courts in French Cameroon, among other grievances. Not long after, teachers in the North West and South West regions also went on strike, demanding for the redress of several issues concerning the English system of education.

Things, however, got worst when Anglophones in both regions, who had been fed up with the unfavourable political and economic situation of the country, the use of French as the dominant and official language, and the marginalisation of the Anglophones, joined the strike.

The crisis recently degenerated into an armed conflict when some Anglophones picked up arms to fight for independence of the Anglophone regions.

The armed conflict has caused the deaths of thousands and thousands more internally displaced with some living in bushes while several other thousands have fled to neighbouring Nigeria, where they are living as refugees.

Separatist leader, Sissiku AyukTabe, and nine others, who were arrested in Nigeria and later extradited to Cameroon, are currently detained at the Kondengui maximum security prison in Yaounde, from where they have been attending trial at the Yaounde military tribunal.

While the Anglophone crisis continues to escalate, international organisations and other western powers have called on the government to address the root cause through dialogue.

<https://www.edennewspaper.net/armed-conflict-in-nw-sw/>

# Anglophone Uprising

An Opportunity To Re-Assess Our Institutions For An Inclusive Leadership And Nation
By Christian Penda Ekoka*
“A moment comes, which comes but rarely in history, when we step out from the old to the new, when an age ends, when the soul of a nation, long suppressed, finds utterance…” (Jawaharlal Nehru, to the Indian Constituent Assembly, New Delhi, August 14, 1947)
More than an Anglophone problem, a national malaise
It is not Anglophone claims, it is also Francophone claims, and it is our national claim for several reasons.
Firstly, when the knell tolls at Bamenda, Garoua, Maroua, Bertoua, Bafoussam or anywhere in Cameroon, “…never send to know for whom the bell tolls, it tolls for thee”. This was the American writer, Hemingway’s admonition about the death or suffering of a human being wherever, because he or she is part of mankind. This sense of common destiny should bind all Cameroonians together, as parts of the same nation.
Secondly, more than an Anglophone problem, recent uprisings in Bamenda and Buea are revelators of a more profound national malaise, resulting from the institutional leadership and governance architecture of our country that was flawed from its original design. In the light of its testing over 50 years, our institutional framework for public affairs’ management appears as not meant to respond to the people’s needs and aspirations.
What is called the Anglophone problem is a specific aspect of a more fundamental national problem that could be defined as a genetic default of a public governance system that is not responsive to the Cameroonian people’s concerns and needs, Anglophones and Francophones as well.
For instance, comparing our country to a body’s system, one could say that the eruption of furuncles on any of its part, would actually mean an infection of the entire body, and its proper treatment would require to tackle the root cause of the disease. In the paragraph below entitled “State’s structures crippled by design…”, one can understand how the body’s system was gradually infected by the bacteria from the origin the nation building process, and how the current shortcomings can be traced back to the original process of our state’s foundation.

The disease has dragged on for so many years with obvious consequences in terms of poor population access to basic infrastructure services including potable water and sanitation, electricity, transportation, healthcare, education, housing, ill performing state-owned corporations chronically sucking subsidies and never self-sustaining; moribund function of several public institutions and enterprises (e.g. Social and Economic Council, National Investment Corporation, National Hydrocarbons Corporation, Douala Stocks Exchange), etc.
The persistence of the disease, not to say its aggravation, should have been a wake-up call for the authorities, but our state-system was not designed with such a preventive built-in control mechanism to timely alert its managers about its dysfunction and eventually its near collapse, making it almost irremediable. Thus the general awareness of the institutions or state-owned corporations’ illness at its terminal stage. Otherwise, how an effective public governance system cannot timely be alerted about the hurdles of its citizens on the road between Douala and Bamenda, or Yaounde and Bamenda (and specially worse the Bafoussam-Bamenda segment), and act consequently; how many lives should be lost on our roads – and specially on the main ones – before a system understands the emergency of the situation; how many lives should be lost in hospitals before the rehabilitation of the healthcare system? How many mothers and babies a country should lose before its consciousness wakes up to the crisis?
To better understand the genetic or endogenous nature of the disease, one could observe that for the past 30 years, President Biya, Cameroon’s Head of State (HOS), has continuously and unsuccessfully denounced in the public service those vices and scandals that impede our development, including inter alia corruption, bureaucratic red tape, embezzlement of public funds, administration bottlenecks, unfriendly business environment deterring investments. In fact, over the years, the spread of the vices became viral translating into the aggravation of discrimination, injustice and economic inequality. Despite the frequent presidential blasting and criticism of the civil service, the persistence of the same hurdles over the years, the government’s inability to address and tackle them, had evidenced the very structural or DNA-like weaknesses of the public governance system’s design, a sort of built-in genetic default that prevents the body’s system to perform at its top; a default that can only be corrected by modifying the public governance system’s DNA.

No piecemeal response, a need for comprehensive and truthful dialogue …
Whatever its outcome, the current negotiations initiated by the government will only address some facets of the problem. With regards to the structural nature and scope of the malaise that involve all national stakeholders – political, civil, religious, etc. –, there is a need to adopt a long term and broad view for a sustaining and lasting solution. This goal demands a comprehensive, constructive and holistic approach; otherwise it will bounce back again. “Law and order” is not a substitute for effective responses to people’s claims and concerns that can only be attained through a responsible and constructive dialogue, underpinned by good faith and open mind of the parties involved, in search of consensually and mutually agreed – and not imposed -solutions. In this context, it should be clearly acknowledged that the case of the Supreme Court’s magistrate Paul Ayah and others will do disservice to the cause of our democracy. We should therefore stand up for a state that protects its citizens’ rights and freedoms of expression, and not a one that terrorizes them.
Any piecemeal, partial or non-inclusive approach will not fail to reduce the issue to a bureaucratic transaction, and it will not fail once again to look patchy and cosmetic, sadly reminding most of us of the Foumban scenario in 1961, that goes down in history for many as a cunning; a zero-sum game whereby for one party to win, the other has to lose, for one party to fatten the other has to starve.
Any piecemeal approach means not doing so, and will result in skipping the most serious questions, and notably: how best to organize a balanced distribution of political power for inclusive wealth; how best to design a transparent democratic governance system that promotes development; how to organize a political system that ensures an efficient allocation of resources, whereby the public service officials or managers are accountable before the people? How to build a nation whose main goal is to ensure freedoms and rights of the citizens in their pursuit of happiness? How to design and organize a public civil service that is devoted to the service of the community and not become its predator?
Besides, one important observation deserves notice, the so-called Anglophone’s claims or complains are no more coming from the founding fathers, but from their children and especially their grandchildren; which means the collective memory is now the fuel of anger and frustration. Looking at 50 years back, they had the impression that the Foumban’s conference on reunification was a travesty, whereby one party was duped by the other. Thus again our call for a transparent, comprehensive and truthful remedying process, heavily involving the young generations whose 80% of population, i.e. about 20 millions, are under age 30.

The role of the media

To this extent, the media is an indispensable instrument that should remain free and independent for the effective accomplishment of its role in the society, and not become a tool of manipulation by or propaganda for any special interest group’s benefit, at the expense of the general interest. As the watchdog for an effective democratic and transparent society, its role should be to provide the citizens with true facts and information to keep them politically vigilant and alert about any threat that may arise against their freedoms and rights. In so doing, media should be aware of the various threats to which it is exposed, inter alia corruption and different negative pressure that would prevent it from effectively fulfilling its duty.

Media should avoid becoming propaganda agents for some special interest groups, which would force them to disinformation and intoxication, for instance indexing the Anglophone as a bundle of Vikings ready to massacre the Francophone, with the obvious consequences of nurturing inter-community hatred and tribalism.

The case of the economy…
At the outbreak of the Cameroonian economic crisis in the mid-1980s, various audits attributed its root cause to the nature of the welfare-state, that had distorted the efficient and competitive allocation of resources, resulting in the economic recession, banking sector’s crisis (huge volume of toxic assets and credit crunch), across the board collapse of state-owned and para-statal corporations. These events led to massive job losses and triggered an unprecedented impoverishment phenomenon across country. For almost 20 years Cameroon embarked on a structural adjustment program (SAP) under the auspices of the Bretton Woods’ institutions. It is only sad to notice that after so much sacrifice and sweat by the population, Cameroon is almost back to square zero, due to poor implementation of the structural reforms recommended by the SAP.
Over the period of more than 30 years, from 1984 to date, the annual growth rate of Cameroon has averaged circa 2 percent in real terms, as compared to a population growth rate of about 2.5 percent; the per capita GDP growth has hence remained stagnant if not shrunken. Adjusting the Boko Haram effect on growth and income distribution, the pattern of poverty curve has worsened over the last ten years, with worst incidence in the rural areas and Northern regions.
The perennial nature of these problems, i.e. poor performance in development achievements, despite the partial public debt cancellation in the context of the Highly Indebted and Poor Countries Initiative (HIPIC), in 2006, it became evident for any shrewd observer that the underlying causes of the “disease” are structural and endogenous, and stem from a root vice in the public governance system’s design,

State’ structures crippled by design, associated risks and adverse effects…
The historical process of our state’s structuring was underpinned by Ahidjo’s grand design of a highly centralized state, almost akin to a totalitarian state which explains many of its current poor performances on social, economic and political fronts. If a state is not designed to acknowledge and preserve the basic human rights of its citizens, how would it promote and protect the specific and historical rights of the Anglophone? The whole process of state formation was flawed from the origin, with the clear design to emasculate people’s rights to emancipation. The event of Reunification was only a step within the grand design. It resulted in a vampire-like state wherein a small bunch of parasite citizens suck the blood and sweat of the others; a system by which a small faction of predators could accumulate large amount of wealth without strive and toil; that favors a welfare-state dependency instead of empowering individuals to forge the destiny of their choice. The main features of this foundation process include:
The political process underlying the dynamics from a multi-party system to one party regime;
The change from a federal state to a unitary state, in fact a totalitarian state;
A massive concentration of powers in the hands of one person, the Head of State, without check and balance’s mechanisms, namely as a result of expunging legislative and judiciary’s independent powers;
A perpetuation of the colonial administration (bureaucracy) that was not intended for development, but for the confinement and the containment of the people; enslaving citizens in a so-called law and order scheme;
A highly centralized government system that is navel-centered and therefore unable to identify the environment’s threats and opportunities;
A top-down decision making process, characterized by frequent bloating, lacking flexibility and reactivity to operate structural reforms, implement projects and address the global developmental challenges;
A public service in which officials wield enormous powers without being accountable to the people;

The above dynamic associated risks include the isolation of the system’s center that becomes hostage of some special interest groups; nepotism and corruption; crony capitalism and market inefficiency; lack of transparent decision making process, mainly in the public contracts’ bidding process;
The adverse consequences for the society include sluggish and non-inclusive growth; public leadership distancing itself from people’s needs and expectations; collapse of public corporations; slowness in public reforms and projects’ implementation; (e.g. decentralization law enacted since 1996); high rate of public funds embezzlement and wastage; poor access to basic infrastructure services; high unemployment rate; poor private investment records; aggravation of impoverishment; uneven regional development; poverty aggravated; zombie and vassal citizens; loss of trust in the state by the youth culminating in loss of hope, self-pride and self-esteem; increase in tribalism ; loss of solidarity and citizenry bindings; defeatism, fatalism and resignation among young generations.

Why Nations fail: lessons from the historical dynamics of societies …
In a compelling book “Why Nations Fail”, the authors, Daron Acemoglu and James A. Robinson, respectively professor of economics at MIT and of government at Harvard, delved into more than three centuries of development history to understand why certain nations grow rich and others remain poor. The outcome of this research shows a strong correlation between the political power distribution and the prosperity dynamics in societies. Here below is what they say:
“In fact, Egypt is poor precisely because it has been ruled by narrow elite that have organized society for their own benefit at the expense of the mass of people. Political power has been narrowly concentrated, and has been used to create wealth for those who possess it, such as the $70 billion fortune apparently accumulated by ex-president Mubarak…Whether it is North Korea, Sierra Leone or Zimbabwe, poor countries are poor for the same reason that Egypt is poor. Countries such as Great Britain and the United States became rich because their citizens overthrew the elites who controlled power and created a society where political rights were much broadly distributed, where government was accountable and responsive to citizens, where, and where the great mass of people could take advantage of economic opportunities…We’ll see that the reason that Britain is richer than Egypt is because in 1688, Britain (or England to be exact) had a revolution that transformed the politics and thus the economics of the nation. People fought for and won more political rights and they used them to expand their economic opportunities. The result was a fundamental different political and economic trajectory, culminating in the Industrial Revolution”
In a highly decentralized or federal-like society, the likelihood is higher to find a more balanced distribution of power that empowers regions, local communities and individuals to gain control over their destiny.
Besides, federalism does not mean Anglophone or secession, it’s a form of state organization, and it is a way of public governance, which has proved its effectiveness as a development accelerator in several countries including USA, Canada, Germany, Australia and several other countries. Let’s not confuse people’s mind, federalism does not challenge or question the founding fathers’ pledge of ‘Unity in diversity”, on the contrary the prevailing highly centralized government does, as attested by its dangerous resulting consequences. The often heard outcry “Le Cameroun est un et indivisible” can only be justified in case of secessionist claims.
Only highly decentralized or federal-like systems of governance are genuinely inclined to empower people and local communities to become the main agent of their development, to be the major stakeholders of their life.

This is a defining moment for our destiny, let’s not miss it…

In 1947, at the dawn of the independence of India, Jawaharlal Nehru, the first Prime Minister of this great country, addressing the Indian Constituent Assembly, told his fellow countrymen that: “Long years ago we made a tryst with destiny, and now the time comes when we shall redeem our pledge….At the stroke of the midnight hour, while the world sleeps, India will awake to life and freedom. A moment comes, which comes but rarely in history, when we step out from the old to the new, when an age ends, when the soul of a nation, long suppressed, finds utterance…”
This is our moment of utterance and reckoning, this is a defining moment for our country; let us frankly face the issue, and not deny it or procrastinate for lasting and sustainable response. We owe it to young and future generations. We should seize the recent events in Bamenda and Buea as a “blessing in disguise”, as an opportunity to re-assess our State’s performance with the aim to build a time-proof effective institutional public affairs’ infrastructure, that will make our country free of violence, free of corruption, etc.; that will align the state’s structure with the founding fathers’ vision of “Unity in diversity”.
With regards to our poor past and present performance in matters of economic and social progress, we should not be afraid to question our present pattern of public governance, or our way of leadership with the aim to improve them, making them much more responsive to the needs of the people. In light of the above evidence, our State, in its prevailing form and structure, appears as more of a liability than an asset. Hence the need for a critical and truthful assessment of public affairs’ leadership and governance.
With regards to the high and frequent level of corruption of certain officials, we should not fear to discuss ways and means to uphold the public high office-holders accountable before the people …Constitutions are not inscribed on stone; the only permanent thing in this world is constant global changes, which continuously challenge our pattern of life, and it may compel a country to adapt its organization for the betterment of its citizens. Over the last 30 years, our world has witnessed the cases of former Soviet Union, Germany, Sene-Gambia, Brexit…Many countries are currently under similar pressure including UK. Anticipation and pro-activeness is the best guide to avoid brutal and undesired consequences akin to these patterns of evolution.
Let us undertake to build a nation that provides all of its children with equal opportunity to fulfill their dreams and aspirations, to realize their own talents, a nation that indiscriminately empowers its citizens, regions and local communities to fully participate in their development process, a nation that gives hope to its young members, that restores their confidence in the State as an impartial institution, guarantor of the people’s security and justice, that engenders audacious and self-confident entrepreneurs, fully empowered to participate in mankind’s venture of value creation, in every venue of life, be it technology, entrepreneurship, energy, water, urbanization, agriculture, manufacturing, biotechnology, physics, information and environment, technology, arts, etc.
Last but not least, let us undertake to build an inclusive nation, based on principles of equality in rights and freedoms for all, for only free minds can develop. That will be our best legacy for future generations. By achieving it, the generations to come 50 years hence, will be proud of us.

* Christian Penda Ekoka is Technical Advisor, Office of the President, Republic of Cameroon

<https://www.edennewspaper.net/anglophone-uprising/>

# Anglophone On Anglophone Vioilence: Where Symbolic and Physical Violence Converge.

**By**Courtney Eko

Anglophone on Anglophone violence is like Black on Black vioilence (in America ). In the former the mostly Francophone  government  and citizens do not care ; in the latter the White’s do not care.

In the interregnum, we continue to kill ourselves, ruin our institutions  and our economy.  Lives and livelihood options are being wasted as the Ambas would say. Why do the oppressed hate themselves  more than the opressor? There is a sociological explanation for this.

 It is called symbolic violence.Also called soft power , symbolic violence   refers to gentle, insidious and pervasive  modes of dominance arising from cognition or misrecognition of power relations  over conscious subjects. Simply put, it’s a situation in which the oppressed or dominated are implicit in their own domination or oppression.

An example of symbolic violence is racism, some whites  and their institutions  believe they are superior to blacks, and through colonisation and  the use of media were made blacks to believe and accept  their own  inferiority.  Thus they straighten their natural kinky hair, use skin lightening  cream etc to look like their  superiors. They defer to them when it comes to running their countries and institutions and remain periphery nations supplying farm gate raw materials.

Anglophones too  have started  accepting they are “dogs” and are thus behaving as such? We kidnap our best , (chiefs and fons), our principals and other cream of our society.  Even our top dogs (no pun intended), organise meetings only to spew hatred and to whip up primordial sentiments of blood and soil a la   Laurent Gbagbo.

The gratuitous violence that the Amba boys (fake or real) are carrying out on people  who in normal times occupy the lower end of the totem pole is baffling. It makes no sense. We are at the lower end of the totem pole in terms of power, social structure, inequality and all socio-economic indicators of development yet we bring this upon ourselves?

The regular Anglophone is now caught between two fringes,  two extremists.  On the one hand ,an intransigent  kakistocracy bent on protecting its privileges, and non- fighting, armchair theorizing Che Guevara’s in the relative safety of the diaspora who disregard the reality that multilateral  institutions have no interest in splitting  nations.

Well, some of us are not with LRC or with Ambazonia for that matter. I’m not with you and I’m  not against you.

The crisis is so polarised that there is no presumption of neutrality . Infact fuck LRC and fuck Ambazonia  too. All I want  is my life back !! I want to be able to drive my son to CPC Bali from Tiko . I will buy banana at Maumu, drink a cold Mutzig in Kumba, eat bush meat at Manyemen and when he is in Bali,  go to City Chemist Roundabout  and eat Achu. Is that asking too much?

<https://www.edennewspaper.net/anglophone-on-anglophone-vioilence-where-symbolic-and-physical-violence-converge/>

1. **Ahead Of 2018 Presidential  Election: Gov’t Stampedes To Halt Mass Exodus From Anglophone Regions**

**By Elias Ngalame**

Administrative officials in the Southwest and North west have expressed worry that the population is increasingly deserting the regions in their thousands on the heels of October 7th Presidential Elections in spite repeated  assurance by the government that their security will be assured.

Governors and SDOs in the two regions have multiplied actions to hold back the fleeing population apparently to avoid massive voter absences and even zero turnout in some places on polling day, a situation that might weaken the credibility of elections participation in these two regions.

In the Southwest just like Northwest administrative officers were obliged to issue travel ban to neighbouring French speaking regions. The Divisional Officer of Buea ,KouamWokam Paul, last week banned denizens from travelling out of  Buea

With separatist fighters and their mentors abroad promising hell in the days ahead which will see the blocking of major highways in a bid to paralyze the holding of elections across Buea and the rest of the Anglophone regions, more inhabitants have been trooping into the already overcrowded mile 17 motor park to seek an escape route to Douala and elsewhere.

This mass exodus is one the administration of Buea could not swallow. As  a result,the DO Paul Wokam  stormed the mile 17 Motor Park in the early hours of Saturday September   in a bid to put a stop to the mass movement of the population into the French speaking regions.

The arrival of the Buea DO witnessed the off loading of transport buses which were already loaded and bound for various destinations out of  Buea with passengers  stranded and transport agencies left confused. The   presence of the South West Governor, Bernard OkaliaBilai at the mile 17 Motor Park amidst a contingent of  heavily armed security officers from the various military units , added to the frustration of the passengers on the run as they lamented the ineffectiveness of military in protecting their lives and property and the uncertainty of what the days ahead holds as a catalyst to their seeking refuge in other regions.

The SW Governor however seized the opportunity to call on the fleeing population to return to their houses and avoid the inconveniences that running to other cities will cost them. He assured the population of adequate security measures put in place to ensure the safety of lives and property.

It is now unclear if the visit by  the SW Governor  and  the DO for Buea  to   Mile 17   is geared towards instituting a ban on the fleeing population to other cities or a move to assure the population of their safety if they remain in their homes.But one thing is certain; the emptying of Buea have left most homes empty with most compounds already being overgrown with grass, and if nothing is done and fast, the dawn of October will witness only the presence of the military, separatist fighters, officials and a handful of lion hearted denizens standing tall in Buea as the majority continues to seek refuge elsewhere for fear of the unknown

Gun fire between separatist fighters and the military coupled with sporadic gunshots from the military across Buea during patrols  have recorded loss of lives in places like Muea, Mile 16, Tole, Bakweri Town, Checkpoint while more have echoed sounds of panic and insecurity amongst denizens .

**Travel Agencies InBamenda Do Brisk Business**

In like manner, agencies in and around Bamenda are making brisk business at this period where there are more passengers travelling out of the region. The mass exodus from rural areas and the towns into Francophone regions has pushed management of the transport agencies to double transport fares yet they still run out of  buses everyday.

The major travel agencies that used to have passengers to fill about five buses a day are today sending out 10 to 15 buses with passengers still stranded at the park. At the popular parks, buses have moved from eight to about 30 a day and transport fares to Bafoussam has moved from fcfa 1500 to fcfa4000.Travel tickets from Bamenda to Douala or Yaounde have  moved from fcfa5000 to fcfa7000 at all the travel agencies and fcfa 8000 at regular parks. Entire households with heavy luggage have emptied selves from the villages in to Bamenda and take two or more days to obtain travel tickets to proceed either to Douala or Yaounde.

The manager of Guarantee express,  Kisito Mbinkar says his management is doing everything to ensure that adequate services are provided for passengers to travel safely.

These people are running away from the violence that has characterized the region with Amba fighters always in confrontation with the military. Most often than not victims of such violence are the armless population who die from stray bullets.

According to one Mr. Moses Atefor, sitting at the park with his family and escaping from the restive Mbengwi, he said life in Mbengwi is, either you stay and be killed by a military bullet or be kidnapped by the Amba fighters for ransom. To him there is no way children can go to school in his area reason why he is moving his family to Douala though he does not know what awaits them there.

To make matters worse, Northwest Governor  AdolfLeleL’Afriqueslammed a ban on all night travels within, in and out of the region and a curfew from 6 pm to 6am till further notice.

On the part of the separatists, a circular issued by the Communication Chief, Chris Anu, late Friday has countered other communiqués from Amba fighters and from the office of the defense force which stated that a travel ban by day, has been imposed by the Amba fighters to take effect from the 25 of September to the 10 of October.

According to one General Ivo of ADF in an audio, the ban excludes nobody and advises that people should stay in their houses and avert any confrontation which according to him would be bloody.

Another communiqué from  Amba fighters in Mbengwi specifies that  those running out of the Region should make sure that they take along every belonging of theirs for they won’t be allowed to come back when calm returns. It said that by running to Francophone areas implies they belong there not in Southern Cameroons.

With all the threats it will be daunting for politicians to carry out campaigns ahead of  7 October  Presidential poll in the Region. Despite these challenges, politicians are busy fine-tuning methods to go about it despite the threats.

Chris Anu in the circular declares that no travel ban has been issued by the IG, so any such ban should be ignored and that any such directives would be relayed to ground zero in the days ahead.

Records from the elections body ELECAM shows that the two regions have the least voter registration due to the ongoing crisis since 2016.Observers say even the few who registered may not turn out for voting on October 7 following massive desertion from the different towns where they registered

The Governors meeting in Yaounde last week centred on security issues in the country before during and after elections, with assurances  from the Minister of Territorial Administration, Paul AtangaNji,   that the   poll will hold in the Southwest and Northwest  regions in spite of growing  security concerns  there.

“There will be elections in the regions because following the statistics given by administrative authorities, we can tell you that the terrorists are in a few places.Generally, the situation is under control. The security forces have done everything despite all the odds to maintain calm and serenity,” AtangaNji told reporters after a fact-finding mission to the troubled regions.

Over 160,000 people have been displaced by the conflict internally and close to 30,000 others are seeking refuge in Nigeria, according to the United Nations.

The Minister’s declaration came after the armed separatist forces threatened to disrupt the upcoming election. AtangaNji said measures have been put in place to restore peace in the regions before the election.

“The terrorists will be tracked down. They will have no hiding place”, he boasted.

*With Reports From****Ignatius Nji, Brian Fomukong ,Solange Bawe, &Therese Masong***

<https://www.edennewspaper.net/ahead-of-2018-presidential-election-govt-stampedes-to-halt-mass-exodus-from-anglophone-regions/>

1. **Anglophone Activists Flee As Gov’t Steps Up Crackdown**
   By Wilson Endah
   As the crisis that has been rocking the North West and South West regions, which has spiraled into an armed conflict, rages on, the government has stepped up its crackdown on all those suspected to be activists or sympathisers to the Anglophone cause.
   In this light, security operatives have been indiscriminately arresting Anglophone activists and suspected activists. This has caused many of them to flee into hiding and the whereabouts of many is not known.
   Sources say the arrested activists are being tortured and detained under horrendous and inhuman conditions. Some have reportedly died in detention.
   It is worth recalling that the Anglophone crisis, something that pundits say had been brewing for several years, boiled over in October 2016 when Common Law Lawyers in the North West and South West regions went on strike, paralyzing the courts. They were demanding for a return to the federal system of government, redeployment of Civil Law Magistrates back to Civil Law Courts among other grievances. Not long after, teachers in the North West and South West regions also went on strike, demanding the redress of several issues concerning the English sub-system of education.
   Things got worse when concerned citizens in the North West and South West regions, who had been fed up with the unfavourable political and especially economic stagnation of Cameroon at large, but more importantly in these regions, joined the strike.
   But after negotiations with the teachers and lawyers ended in deadlock, the government banned the Southern Cameroons National Council, SCNC, and the Cameroon Anglophone Civil Society Consortium, CACSC. Some of the leaders of the Consortium such as Barrister Felix Agbor Nkongho and Dr. Fontem Niba were immediately arrested while others such as Barrister Bobga Harmony and Tassang Wilfred fled into hiding.
   But as the crackdown on the activists escalates, several cases have been reported.
   A case in point is that of Chumbih Bakamen Monique Siona, a young Anglophone teacher and activists, who was accused by government of siding with separatists, preventing students and pupils from going to school, collaborating with separatists and causing riots and disorder in schools. She is said to have escaped after spending close to four months in detention.
   Chumbih Bakamen Monique Siona was arrested on February 25th 2019 by some unidentified armed men, but thanks to her father’s influence, she was released on bail.
   On July 30th 2019, she was again arrested by the military along the Tiko-Douala highway.
   She fell sick in her detention cell and was admitted in hospital where she managed to escape from her sick bed on August 15th, 2019.
   The whereabouts of Chumbih Bakamen Monique Siona, who is a language teacher at a government school in Ekona and Buea Bilingual College, is not known since her escape. But if arrested, she will be tried by a military tribunal under the anti-terrorism law whose maximum sentence is the death penalty. That is if she is not killed like many others who have been victims of extra-judicial killings.
   It should be recalled that leaders of the Anglophone separatist movements including Sisiku Ayuk Tabe and nine others, who were arrested in Abuja, Nigeria in January 2018 and later extradited to Yaounde were in August 2019, handed life jail sentences.
   It is also worth noting that many people, both civilians and security forces, have been killed in the crisis, many more internally displaced and over 30,000 have fled to neighbouring Nigeria where they are living as refugees.
   While the Anglophone crisis continues to escalate, International Organisations and other Western powers have called on the Government to address the root cause through dialogue.

<https://www.edennewspaper.net/anglophone-activists-flee-as-govt-steps-up-crackdown/>

1. **Two Buea-Based Journalists Arrested**

By Ndi Eugene Ndi

Two journalists were arrested late Thursday in the South West town of Buea, sources said as government continues a crackdown on Anglophone activists.
Security forces seized Atia Tilarius, the Political Desk Editor of The Sun newspaper and, Amos Fofung, the Buea Bureau Chief of The Guardian Post daily in connection with the ongoing Anglophone crisis in the central African nation, Geoffrey Elah, the Editor of The Sun said.
Cameroon’s Anglophones have held grudges against their Francophone brothers for duping them in a post-independence reunification deal, where they expected to be equal partners. They often complain of being treated as second-class citizens.
In 1961, a vote was held in the then Southern Cameroons—today’s English-speaking Northwest and Southwest regions, over whether to join Nigeria, which had already obtained independence from Britain, or the Republic of Cameroon, which had obtained independence from France.
Voters elected to become part of French speaking Cameroon, and the country practised a federal system until 1972.
The Anglophone regions have in the recent past resorted to anti-government protests, with some calling for secession.
But the government refuses to budge.
President Paul Biya said in his 2017 New Year address to the nation that Cameroon was one and indivisible.
He said there would be neither federalism nor secession.

<https://www.edennewspaper.net/two-buea-based-journalists-arrested/>

1. **Ban On Consortium, SCNC: Activists Going Underground As Leaders Are Arrested**

By Cham Victor Bama

Since the banning of the Cameroon Anglophone Civil Society Consortium, CACSC, the Southern Cameroons National Council, SCNC, and the subsequent arrest of their leaders such as Barrister Felix Nkongho Agbor-Balla (President), Dr. Fontem Neba (Secretary General), Mancho Bibixy, initiator of the “Coffin Revolution”, Justice Ayah Paul, who advocates legal arguments that Anglophones have a right to self-determination, many activists of the SCNC and the Anglophone cause have been going into hiding or living in fear.

Other activists such as Njousi Abang and Godden Zama of the leading opposition Party, SDF, have been arrested and detained and are being prosecuted. Others such as Barrister Bobga Harmony, President of North West Lawyers Association, NOWELA, and Barrister Eyambe Elias Ebai, President of Meme Lawyers Association, MELA, are equally on the run.

It would be recalled that Anglophone lawyers started their peaceful demonstration to force government to attend to their demands, almost bringing the courts in the North West and South West regions to a standstill; but police in riot gear tear-gassed and molested them in Buea and Bamenda. Then came the Anglophone teacher’ sit-in strike on 21 November 2016.

As the teachers observed their sit-in strike from 21 November 2016, a group of denizens in Bamenda led by a Journalist, Mancho Bibixy, who was carrying a coffin, paraded the streets of the town, decrying the deplorable state of the roads. The demonstrations soon turned violent and bloody as the protesters clashed with anti-riot police, resulting in the death of several persons.

Also taking advantage of the protest in Bamenda, SCNC activists infiltrated the ranks of the protesters with placards, calling for the restoration of the independence of Southern Cameroons, causing mass arrests of activists.

But since December 2016, ghost towns operations and boycott of schools, called by the now banned Cameroon Anglophone Civil Society Consortium have crippled activities in the North West and South West regions. The Consortium and other bodies have condemned the repressive measures adopted by government to resolve what is now known as the Anglophone crisis.
The ongoing strike by lawyers and teachers calls for federation or independence of Anglophones, characterised by ghost towns and at times vandalism and violence in Anglophone Cameroon.

But as the crisis persists, many activists are now living in fear or have gone underground. Bulawah Derick, born on 19 November 1986 in Ndop, a graduate from the University of Douala and married to Rosina Akem Tain Yein, with two sons, is one of them. This member of a civil society organisation has been very vocal against the illegal occupation, colonisation and marginalisation of Southern Cameroons. During a talk show radio programme in November 2015, he was arrested and detained at the central police station in Kumba, though released days later. This was after his presentation of the programme ‘Can Change of Power Be a Reality in Cameroon?’

While on work vacation in Bamenda Bulawah was arrested at their family residence following an uprising by disgruntled Anglophones. On their way to Yaounde with security operatives, to face criminal charges at the Military Court, around Bafoussam Bulawah Derick and others jumped off from the moving truck and ran into the nearby bushes. Since then he has been declared wanted and family sources confirmed that he has been in an unknown destination for fear of being persecuted. His wife, Rosina Akem Tain Yein, has equally fled to an unknown location as she has been constantly harassed and detained under inhumane conditions, just for her to indicate the whereabouts of her husband.

Meanwhile, Valentine Balan Mengnjo, who left the country since 2003 to an unknown destination, is an SCNC member wanted by the government. This has been aggravated by the current uprising in Cameroon geared towards secession. His case is even more complicated because the regime has discovered that he, alongside Juri Lambert, Sama Tomas, Doris Nick Tenya and Misicibe Kaavi, are amongst the main sponsors of the SCNC activities.

Born on 13 August 1976, Kahgempu Ngwanyi Bonaventure, another SCNC member is undergoing this same experience. This Lifting Gears Inspector attached to Societe Generale de Surveillance, S.G.S, in Douala is reported to have gone underground to an unknown destination since April 2017, family sources have disclosed. Confirmation from security operatives confided to his Counsel that he is fleeing arrest, detention with inhumane prison conditions and subsequent persecution by the Yaounde regime, due to his involvement in SCNC activities. Kahgempu Ngwanyi Bonaventure’s name is the talk of the town as a frontline SCNC member who speaks courageously about the Liberation of Southern Cameroons.

These SCNC and Civil Society Activists, family relations confirmed, have simply gone into hiding for fear of subsequent arrests and torture, taking into consideration the numerous arrests and inhumane treatment they, like other activists, have been subjected to in the various detention centres with deplorable conditions.

Going by family members, their homes have been centres of impromptu visits by security operatives. Their family members have ever since their disappearance to unknown destinations, suffered from serious threats from police and gendarmes who coerced them to disclose their whereabouts. Many other young activists have since become mute and are hiding, fearing for their lives, leaving their families worried.

If caught, like others who are being detained in Yaounde, they shall be prosecuted in court and shall face charges for hostilities against the fatherland, secession and terrorism, whose punishment is that of death sentence, according to the anti-terrorism law enacted a few years back.

It would be recalled that the SCNC, created in 1994, has its main goal the restoration of the independence of Southern Cameroons which gained independence on 1 October 1961 by joining La Republique du Cameroun, to form what is today known as the Republic of Cameroon.

The SCNC emerged with Barrister Ekontang Elad as pioneer chairman because Southern Cameroonians (English-speaking) thought they were grossly marginalised in their union with La Republique du Cameroun (French-speaking).
But since the creation of the SCNC, which the regime tags as an illegal and secessionist group, adherents of this pressure group have been molested, persecuted, prosecuted and jailed. With continued government crackdown on SCNC activists, many have fled and are fleeing the country to seek for safer shores elsewhere.
<https://www.edennewspaper.net/ban-on-consortium-scnc-activists-going-underground-as-leaders-are-arrested/>

1. **CDC Rassures Workers Despite Difficulties**

By Clextus Abong

The Cameroon Development Corporation, CDC will not abandon its apolitical and people centred values despite the current difficulties that it faces.

This assurance was given by the General Manager of the corporation Franlin Ngoni Njie in a recent press release.

The CDC boss has assured the company’s workers, community leaders and the entire population that measures are being taken by the competent authorities to ensure the corporation continues to function and play the very role for which it was created since 1947 in wake of the on-going Anglophone crisis that affected the corporation.

“The company is an apolitical, people –oriented organization with the goal to acquire, develop and operate extensive plantations of tropical crops”, the release stated.

While reminding the workers and other stakeholders that the company remains committed to the ideals and principles of development that underpin its creation and existence, Mr. Ngoni Njie called on all the workers, community leaders, and the general population to exercise calm and  respect foa all installations and property owned by the corporation.

The GM’s assurance comes at the time when the corporation is facing a lot of challenges caused by the on-going crisis in the South West and North West regions. This has led to attacks and destruction of the corporation’s installations, causing negative setbacks on the operations of the company.

While assuring all the workers of the state’s engagement in providing lasting solutions to the crisis, the GM, enjoined the entire CDC family to remain calm and forward looking as the management is doing all it takes to ensure things unfold in the best interest of workers.

<https://www.edennewspaper.net/cdc-rassures-workers-despite-difficulties/>

1. **Mayhem in Ekona after serious military confrontations with “amba boys”**

**By Cham Victor**

A combine military contingent comprising of elements of BTAP, ESIR and BIR have launched deadly attacks on Ekona some 10 kilometres in the outskirts of Buea.
The attack, which was aimed at dislodging an Amba camp, also saw the shooting and killing of innocent civilians many of whom were women and children. Sources say that the combine operation started at 4 am and went on for a few hours.

Eyewitness reports indicate that one family suffered a heavy lost after their son, Romanus Meboka Ngome, who was alleged to be an ex-separatist fighter was targeted. When the military arrived at the compound but couldn’t find him, his cousin was shot and killed alongside a neighbour.
We also gathered that that after the military invasion, their house in Ekona was completely burnt down.
It was therefore for fear of his life that Romanus Meboka Ngome is said to have gone underground since June 2019. His whereabouts has since remained unknown. Sources close to his family say he might have fled to a neighbouriing country.
It should be noted that the crisis in the North West and South West regions has since morphed into an armed conflict with armed separatists fighting to get an independent state called Ambazonia. Over half a million persons have been displaced, about 2,000 killed and about 50,000 have fled to neighbouring Nigeria where they are living as refugees.
Schools have remained closed and hundreds of villages have been burnt as the violence rages on.
While the Anglophone crisis continues to escalate, International Organisations and other Western powers have called on the Government to address the root cause of the crisis through dialogue.
In July 2018, the African Union Commission had called for dialogue to end the armed conflict rocking the English-speaking regions.
The urge was echoed by the Chair of the African Union Commission, Moussa Faki Mahamat, during a visit to Yaounde. He asserted that dialogue is the best way to settle the differences that are fuelling the ongoing Anglophone Crisis rocking the country.
The AU boss, who was on a three-day official visit in Cameroon, condemned violence in all its ramifications. While stating that the Anglophone Crisis is one of the key issues he discussed with President Paul Biya, Faki Mahamat, the Chadian national, said dialogue is the best way through which both parties can settle the problem peacefully.
He expressed solidarity with the population of the affected areas, promising to transform his solidarity into concrete actions as soon as he goes back. Faki Mahamat reiterated his organisation’s commitment to promote unity, stability and the protection of the territorial integrity of member States. He lauded Cameroon for its uniqueness, saying the country is a symbol for socio-cultural and linguistic diversity.

<https://www.edennewspaper.net/mayhem-in-ekona-after-serious-military-confrontations-with-amba-boys/>

1. **Many Deaths Reported In Kembong**

By Solomon Tembang
As Cameroonians around the country on Sunday 11 February 2018 celebrated this year’s edition of the National Youth Day, violent clashes and gun battles were reported in some areas of the country.
A prominent case is that of Kembong in Manyu Division of the South West region, where three soldiers are reported to have been killed by separatist fighters.
The attack in Kembong came hours after President Paul Biya in his address to the youths said the situation in the North West and South West regions were stabilising, despite ongoing widespread fighting.
Separatists have killed at least 25 soldiers and policemen in a series of raids over the past year. Soldiers, in retaliation, have also reportedly been killing some civilians, burning down houses and raiding homes. In most of the towns where the gun battles between the security forces and assailants have taken place, many civilians have fled into the bushes for safety.
On the attacks in Kembong, the leader of the Ambazonian Defence Force, an armed separatist group, Cho Ayaba, is quoted to have said “ADF forces carried out the attacks”.

Uneasy Calm In North West And South West
In Limbe, Buea, Kumba among other towns in the North West and South West regions, there was an uneasy calm as the Youth Day was celebrated. Security was very tight to preempt any ugly incident.
Though the celebrations in these towns unfolded hitch-free, pundits have described them as low-key.
It would be recalled that the ongoing crisis that has been rocking the North West and South West regions began in 2016 when government cracked down on protesting English-speaking lawyers and teachers.
Civilians were killed and subsequent violence against protesters helped boost support for a separatist movement, including armed groups looking to form a new state called Ambazonia.
An army crackdown on the insurgency forced more than 40,000 people to flee to Nigeria, according to the United Nations.

<https://www.edennewspaper.net/many-deaths-reported-kembong/>

1. **Cameroon At Crossroads, SW Must Support President Biya -Senator Musonge**

By Paul Kode and Bama Cham

The leader of the CPDM South West Regional Permanent Delegation Senator Peter Mafany Musonge has described the present state of Cameroon as being at a veritable crossroads.
Security-wise, he alluded to the irksome, unfortunate incidents perpetuated north of Cameroon by the faceless and inhumane sect that goes by the loathsome name of Boko Haram. Whereupon, he summoned the mammoth crowd of CPDM supporters from the entire region and beyond, to dedicate a minute of silence to the fallen heroes who have paid the ultimate price in the course of safeguarding the nation’s integrity. Then, he thoughtfully cited the prevailing jihad waged against the sect by the President, Paul Biya – and that is bearing fruit.
But the real crux of the meeting in Buea last Saturday 5 February 2016 was to orient the population of the Southwest region to make a judicious choice of their Presidential candidate during the 2018 crucial elections. Without mincing words, the elderly Statesman read a litany of projects undertaken by the incumbent Chair of the Ruling party that have either been realized or are soon to see the limelight, in the Southwest region.
As expected, Senator Peter Mafany Musonge capitalized on the region’s principal toothache, spinal chord, malaise – roads! That’s when the experienced politician deftly urged the Southwest population to ensure that they choose President Paul Biya as their one and only candidate during the 2018 presidential elections, to effectively ensure continuity of many more of such achievements.
He recalled President Biya’s political, economic and diplomatic savvy that he has displayed since 1982 – citing the peaceful resolution of the Bakassi-Nigeria muscle flexing as just one out of many. He also talked about the primordial importance of Cameroon’s strategic geophysical location, naturally helmed between West and Central Africa and her valiant efforts to maintain holistic equilibrium therein.
Musonge reminded the over 5000 CPDM stalwarts that the clarion call to rally behind Mr. Biya as one man had also been chronicled by such eminent fora as the Southwest Chiefs Conference, Southwest Elite Association and a host of others, when the political time table is set.
Paraphrasing the adage that bad things happen when good men do nothing, Senator Musonge asked the audience, ‘should we also keep quiet when confronted with an equation to make a choice?’
Yes, Musonge acknowledged the fact that sceptics and critics and those of a different political persuasion would definitely reason otherwise. But he assured his avid audience not to pay heed to the myopic vision of such detractors as everyone in the region, including the very opponents of Paul Biya’s candidacy will end up benefitting from the good roads, Limbe deep sea port, entrepreneurial institutions and many other projects of that ilk.

YCPDM and WCPDM In Concert
The two strategic arms of the CPDM Party triangle equally made their voice heard loud and clear during the historic occasion, in tandem with the main party organ. As a show of solidarity, camaraderie, unity and common vision, they all respectively spoke in one language. Comrades David Mafany Namange (Fako III YCPDM), Aminkeng A. Teclar (WCPDM,Lebialem I) and Johnson Songo Ndiba (Mambanda) individually turned the literal pages of a huge catalogue of achievements whose direct beneficiaries are the youths and women in the Southwest region, through the initiative of their proposed presidential candidate, Paul Biya.
The statistics were very glaring. The National Civic Service Agency for Participation in Development for instance and other Technical Institutions put in place by the Biya regime, in the Southwest region have imbued the youths with marketable skills. Thus, most of them are no longer just job seekers, but have metamorphosed with elation, into job creators. The unexpected but very much welcomed bundle of 102 billion frs. announced by President Biya on the eve of 2016 Youth Day to empower the youths fiscally, was equally brought to the fore. Comparing the positions occupied by women on the social ladder, it was revealed that over 30% of women are now either at the helm of affairs, or inclusively represented in the Upper and Lower Houses than before 1982.
At the end of the session, the Governor of the southwest region was handed a copy of what was dubbed as the Buea Call for onward transmission to hierarchy.
The historic Buea Call ceremony was witnessed by the cream and grassroots of the Southwest region and beyond. Traditional Rulers, CSOs and all stakeholders who constitute the vital force of the region made their presence count. The entire programme was spiced by choral renditions and rhythmic traditional dances, at Bongo Square.

<https://www.edennewspaper.net/cameroon-at-crossroads-sw-must-support-president-biya-senator-musonge/>

1. **Teachers’ Strike: Detained Principal Released**

By Bama Cham
The principal of Government Bilingual High School Muea in Buea Subdivision, Mbeke Richard, was last week detained in relation to the strike by teachers.
Mbeke Richard was arrested and detained at a Buea-based Police Station on 24 November. He was however, later released on 25 November 2016.
The reason for his arrest is not yet certain as no official statement has filtered out. All attempts to get his side of the matter were futile.
Sources hinted this reporter that his arrest might be connected to his alleged attempts to compel the French section of the institution to go on strike. It is alleged that as he proceeded to enforce the decision, die-hard Francophone teachers purportedly reported to the Governor whom, we gathered, may have ordered the arrest.
However, another school of thought purports that the principal, Mbeke Richard, is accused of hoisting the blue and white flag, believed to be that of the Southern Cameroons National Council, SCNC, on campus. The police are reported to have stormed the school when allegations that the SCNC was holding a meeting in the school spread. But on arrival, the police are said to have instead met a class of teachers who were strategizing methods to assist students in the examination classes.
It is against this background check among others that Mbeke was arrested, our sources claimed.
All Anglophone teachers are currently on strike demanding government to redress the assimilated English subsystem of education among other demands.

Buea DO Tour Schools
Meanwhile, as the planned sit in strike action took off effectively, Monday 21 November, the Divisional Officer for Buea, Wokam Paul, visited some secondary and primary schools to hand down firm instructions to principals and head teachers to report teachers who were party to the strike.
Teachers were advised to organised PTA meetings Saturday in their respective institutions so as to encourage parents to send their children to school come Monday.
Some head teachers and principals, who spoke to Eden, confided that over their dead bodies will such meetings take place.

Taxi, Bike Businesses Almost Grounded
The business climate in Buea witnessed a slow pace, unlike the past when students kept taxi drivers and bike riders busy. The first week of the indefinite strike sent bad signals to these sectors.

UB Vice Chancellor Clashes With SYNES
Meanwhile, uneasy calm reigned in the campus of the University of Buea last Tuesday 22 November following a highly contested communiqué issued by the, Vice Chancellor, Dr Nalova Lyonga’s, Deans and Directors as a resolution of a meeting of the university.
The commission asserted that classes will resume Wednesday 23 November. It equally urged lecturers to uphold their responsibilities and go on with lectures.
In retaliation against the release, SYNES branch president, Prof Abangma James, counteracted resolutions adopted at the Deans and Directors meeting.
He called for the non boycott of the ongoing strike action until solutions are made.

<https://www.edennewspaper.net/teachers-strike-detained-principal-released/>

1. **SDF Accuses Govt Of Attempting To Kill Fru Ndi**

By Ndi Eugene Ndi
The Social Democratic Front, SDF, has accused state security operatives of attempting to kill its National Chairman, Ni John Fru Ndi. The leading opposition party said several life bullets were fired into Fru Ndi’s Bamenda residence last Wednesday.
“This constitutes a clear attempt on his [Ni John Fru Ndi] life and that of his family,” a statement by SDF Members of Parliament said.
Tension has been rising in the opposition stronghold of Bamenda since Monday 21 November following a confrontation between anti-riot soldiers and unarmed civilians who joined Anglophone teachers in a protest against government’s posting of Francophone teachers in English speaking schools of the North West and South West regions.
“Francophone teachers don’t master our [Anglo-Saxon] system of education. They have been destroying our children,” said Tassang Wilfred, Secretary General of the Cameroon Teachers’ Trade Union (CATTU); one of the leaders of the strike.
At least one person was killed during the demonstration in Bamenda on Monday 21 November.
Anglophone lawyers in the country have also been protesting among others against the deployment of Francophone judges who did not study the British Common Law to courts in the two regions.
“We fully support these strike actions which constitute a legal and constitutional weapon of expression of grievances in a country that purports to respect the rule of law,” the SDF pledged in the statement signed by Hon Dr Joseph Bandzem Lukong, the party’s parliamentary group leader at the National Assembly.
Cameroon has ten semi-sovereign administrative regions (formerly called provinces) with eight predominantly French speaking.
Anglophones in the country have held grudges against their Francophone brothers for duping them in a post-independence reunification deal where they expected to be equal partners. They often complain of being treated as second-class citizens.
According to the national legal adviser of the SDF party, Cameroon from inception was made up of two entities; the Southern Cameroon and East Cameroon. This according to him was a fundamental principle that the two legal systems just like the educational system would be maintained and they will evolve side-by-side.
“But today we are witnessing a dangerous situation that is prejudicial to the peace and unity of this nation,” Hon Joseph Mbah Ndam, himself a lawyer, said of the strikes.

<https://www.edennewspaper.net/sdf-accuses-govt-of-attempting-to-kill-fru-ndi/>

1. **How Only An Anglophone President Can Ensure Cameroon’s ‘Unity’**

Killings, Rape And Torture Scare Students From Campuses
By Christopher Fon Achobang
Cameroon has been rocked by public protests since 21 November 2016 leading to a very fisted an irrational reaction from the military and paramilitary police with the death toll set at over a dozen, many raped, tortured and scores of arrests.
Students at the University of Buea and the University of Bamenda are having nightmares remembering their colleagues who were raped and tortured. Students were pulled from their beds and thrown out into the streets where they were paraded as protesters and arraigned in court. Some were raped in their rooms and their property destroyed.
In the University of Bamenda, Julius Akum was shot and killed. His friend Ndifor Sylvester Junior says the spectacle of his friend in a pool of blood still sends shudders down his spine. “I am not sure I would be comfortable sitting in that same amphitheatre where I used to read with Akum. I am traumatized and have nightmares.” Said Sylvester Junior.
Junior’s toe was crushed with the nail pulled out necessitating anesthesia, antibiotics and pain killers. “I am lucky to have left Bambili alive. It could have been me lying in that pool of blood.” Junior lamented.
This is not the first time students have been killed in Cameroonian universities. In 2005 and 2006 student riots were very bloody at the University of Buea. Students had been caught in a web of protests which finally led to the sacking of Dr. Dorothy Limunga Njeuma, the pioneer Vice Chancellor of the University of Buea who had been in the same position for 13 years. Ambouer Gaous and three others were the price the students paid before the government of Cameroun heeded their calls.
Before Christmas of 2005, body bags and coffins were sent back to families as Christmas gifts. People lost loved ones, who were executed for committing no crimes. Ndive Elvis still remembers how Ambouer Gaous was shot in front of their house in Molyko where he was washing plates.
“Gaous was my schoolmate and childhood pal. He was not even involved in the strike, but was shot. I carried him on my shoulders for more than a kilometer before he died on the way to the hospital. It was a sad day for me. Life has never been the same again. This time, we must drive these barbarians from our country.” Said Elvis.
There was outright grief across West Cameroon. The force used to quell the student uprising was too much and did not match the stones from the students. Instead of apologies from Cameroonian authorities, their agents and assigns at the University of Buea organized a press conference at which they compared the stones from the students to the bullets from the soldiers.
“David killed Goliath with a stone. The students could have killed the soldiers with stones had luck not been with the soldiers.” Opined Herbert Endeley
Dr. Herbert Endeley then served as Registrar of the University of Buea under the Vice Chancellor, Dorothy Limunga Njeuma. He was part of the crack team put together to justify and normalize the crimes against students in the University of Buea. God frowned at his callousness and he died a few months after. Others who treat the oppressed with the same attitude will end in uncharted storms.
Who gives orders for students to be killed?
It should never be heard that students or any unarmed persons involved in a public demonstration of a non-violent nature is killed, tortured or maimed.
Videos have gone viral with students at the University of Buea shouting “No violence, no violence.”
Yet, without provocation, truckloads of soldiers and paramilitary police swooped on the campus of Buea University and started beating the students. Some were meted the most inhumane treatment. They had to escape to their homes where soldiers promptly followed and indiscriminately sacked homes arresting bystanders and defiling young virgins.
Since Common Law Lawyers started their strike action requesting respect of Common Law values, teachers have joined requesting an improvement of their working conditions and some fairness across the board. The populations unrepresented by these professional guilds have their fair dose of grievances that would find other outlets of expression.
The reaction from the Camerounese authorities in Yaounde has been muted or laced with a pinch of sarcasm and arrogance. They behave like West Cameroonians were slaves conquered during a war. Even after the reminder from Hon. Joseph Wirba that West Cameroon was not a conquered territory, Yaounde still behaved like nothing was seething on the ground.
With years of experience watching society and involved in social change, there is something even those protesting now and the authorities fail to capture.
Cameroonians are very angry.
West Cameroonians want their autonomy.
Yet some lawyers believe that the autonomy sought for by 98 percent of West Cameroonians could be negotiated with the oppressor and settled in federal arrangements.
Federalism has never worked in Cameroon and it would not work now.
In a federal system, it would mean control of national defense, security, diplomacy, international trade, and taxes would still be managed by Yaounde. Federation would mean that projects executed in Buea and Bamenda would still be controlled by inspectors from Yaounde who would be requesting 60 percent of the budget for their upkeep and travel. Federation in the Cameroon model would mean that when students start protesting peacefully, troops should be sent from Yaounde to quell a rebellion in Bambili and Buea campuses as national security is threatened.
In a federation, the President of the republic in Yaounde would still appoint State prosecutors answerable to a very corruptible system. Once Yaounde promised an incentive to its appointed judicial officers, they started speaking in tongues swearing that their hands had been tied.
Common Law Lawyers should be saying, even if there were not enough Common Law magistrates trained by the School of magistracy, seasoned common law lawyers could step into their shoes and preside over court sessions, impartially. You do not need any formal training to migrate from a lawyer of the bar to a magistrate of the bench. Your only qualification is a mastery of the Common Law tradition, practice and incorruptibility, which Yaounde authorities frown at.
In all fairness, we must shelf all arguments of bilingualism.  As a career translator, I submit that court arguments should never be reduced to an exercise of bilingualism. The court has its idiom and specialized terminology which can never be captured by any bilingual beast. And for Cameroon which has produced some of the best translators in the world to swim against the tide in such a lugubrious manner is despicable and challenges the mettle of their best minds.
I am holding my tears for a country that has lost its soul. We should be ashamed to be part of a country that has normalized rape, torture and killing.
More than ten years ago, in 2005 Pa Fogwe who is above 90 today lamented in my ‘Wreath to a Soulless Nation’ that any country that killed its youths, killed its future. I would add today that any country that raped its youths, raped its future. And any country that maimed its youths maimed its future.
Brains and male genitalia blown out and shredded by bullets have been circulated by social media as the handiwork of Cameroon soldiers. It would seem those who gave orders for unarmed civilians to be killed in Bamenda and West Cameroon ordered the troops to destroy the manhood and minds of West Cameroonians. Cameroon soldiers believe they would forcefully castrate and numb the brains of the alert West Cameroonians. The young girls who were raped were raped in a bid to destroy their womanhood and take away their pride. These are all crimes against humanity.
Biya Speaks after three months of atrocities.
What would President Biya of Cameroun be saying after watching with sealed lips and waxed ears for three months after part of his supposed colony started protests? Would he pretend nothing has happened or nothing was wrong?
As has become a tradition, the speech Biya would present on 31 December 2016 would fail to be a State of the Nation address. He does not understand the problems of Cameroon and has never proposed solutions to these problems. How would a Head of State not make a statement while his people are killed in droves?
We have been commenting on President Biya’s end of year speeches as clear indicators that the man has lost control of Cameroon. If he has lost complete control of Cameroon and has become speechless as he is in the case of three months of protests in West Cameroon, then the vacuum has to be filled.
In my 2015 commentary on Biya’s speech of 31 December 2014, I recommended that unable to control Cameroon, Biya should allow the West Cameroonian to return to her country and manage it the way it did before the pseudo independence by joining the Cameroun Republic.
For Biya to emerge as a visionary in old age, he should set the stage in his end of year speech for a smooth transfer of autonomy back to the West Cameroonian.
Nobody should wallow in thoughts about the difficulties of sustaining an independent West Cameroon.
All oil consumed in Cameroon comes from just one of the counties of West Cameroon. The assets that Cameroun got from Cameroon Bank, Produce Marketing Board, Wum Area Development Authority, Cameroon Development Corporation swelled the reserves of East Cameroun.
If we are let off the hook with no cent, we would be worth billions by January 10 2017. Let Biya cut all revenue to West Cameroon plus electricity and water; we would float new ones within a fortnight.
Let nobody scare us that we would not be able to do it. All our laborers deployed throughout the Cameroun republic should come back and we would turn these seemingly barren hills into fruitful kibbutz. (Orchards and gardens recovered from the Israeli wilderness).
The blood of our fallen brethren will fertilize our fields and heal our raped virgins once we get independence to honour their dreams and memories. Their blood would free us of Cameroun’s deception, dishonesty, incompetence, clannishness, divisiveness and insincerity, amongst other ills.

<https://www.edennewspaper.net/how-only-an-anglophone-president-can-ensure-cameroons-unity/>

# Govt Steps Up Clampdown On SCNC Activists

By Bama Cham
The government has stepped up its clampdown on activists of the Southern Cameroons National Council, SCNC. Security operatives have been apprehending and incarcerating activists of the liberation movement.
It would be recalled that in January 2017 the Minister of Territorial Administration and Decentralisation, Emmanuel Rene Sadi, banned the SCNC and the Cameroon Anglophone Civil Society Consortium, CACSC. Some of the leaders of the Consortium such as Barrister Felix Agbor Nkongho and Dr. Fontem Niba were immediately arrested while others like Barrister Bobga Harmony and Tassang Wilfred fled into hiding.
Sources say the arrested activists are being tortured and detained under horrendous and inhuman conditions. Some have reportedly died in detention.
Created in 1994, the Southern Cameroons National Council, SCNC, has as its main goal the restoration of the sovereignty of Southern Cameroons which gained its independence on 1 October 1961 by joining La Republique du Cameroun, to form what is today known as the Republic of Cameroon.
The SCNC had emerged with Barrister Ekontang Elad as pioneer chairman because Southern Cameroonians (English-speaking) thought they were grossly marginalised in their union with La Republique du Cameroun (French-speaking).
But since the creation of the SCNC, which the Biya regime tags as an illegal and secessionist group, adherents of this pressure group have continued to be molested, persecuted, prosecuted and jailed.
Some of the activists are now living in fear while others have gone underground or fled for fear of their lives. A case is that of Nkeng Daniel Nguatem, who joined the SCNC in 2012 while he was a student of the University of Bamenda. When he was elected Secretary of the Student Union of the University of Bamenda during the 2012/2013 academic year, the SCNC charged him with the sensitisation of students and other youths around his locality on the objectives and activities of the liberation movement.
After graduating from the University of Bamanda, Nkeng Daniel Nguatem, in 2016, moved to the University of Buea to pursue a Masters programme. While in Buea, he continued with his SCNC activities. But this time around luck ran out for him as the Buea branch of the SCNC was under investigation by security operatives. On 3 March 2016 the forces of law and other, after secret investigation, stormed the classroom in the university where the SCNC activists were holding a meeting. About 118 of them, including Nkeng Daniel Nguatem, were arrested and whisked off to the Buea Central Prison. The arrested activists were reportedly tortured and detained under horrendous conditions sometimes barely having a single meal a day.
While sources say there were plans for the activists to be transferred to the Kondengui maximum security prison in Yaounde, Nkeng Daniel Nguatem miraculously escaped. He is reported to have fled the country for fear of his life. The other activists have been facing trial for hostilities against the fatherland, secession and terrorism. It would be noted that the punishment for terrorism if found guilty is the death penalty, according to the anti-terrorism law promulgated a few years back.
It should be noted that the SCNC struggle is predicated on the legal historical facts found in the United Nations archives and has a solid foundation and enjoys international recognition by Regional bodies as well as the UN.
La Republique du Cameroun, unable to challenge the SCNC, has resorted to brutal repression of its members and activists and wanton arrest and imprisonment of its supporters, thereby causing many youths to flee the country in search of safer shores.
According to some SCNC officials, for over 55 years, advocates of the Southern Cameroons independence have been killed, maimed, imprisoned unlawfully, raped and robbed of their basic right to a sovereign nationhood.

<https://www.edennewspaper.net/govt-steps-clampdown-scnc-activists/>

1. **Bullets Can Never Suppress Truth -Fru Ndi**
   By Ignatius Nji

Chemuta Banda NCHRF Chair in Bamenda
Embittered SDF Chairman Ni John Fru Ndi, has call on the powers that be to stop all the summarily arrest orchestrated in the Region by men in uniform, stating that information reaching him indicates that it has been transformed in to a money making venture. People are arrested on trump up charges and taken to up station where those who can afford pay hundred of thousands to get release or ferried to Yaounde. Chairman Fru Ndi intimates that, “…If the Governor does not stop the several arrests which have been transformed in to money making, he will be considered as an accomplice.”
Leaders of the main opposition made these declarations during a fact finding mission by the National Commission on Human Rights and Freedom headed by the Chairperson, Chemuta Divine Banda, at the Regional office in Bamenda on February 2, 2017. Fru Ndi was emphatic that all the bans on trade unions as slammed by the Minister of territorial administration and decentralization. Government should start implementing what were arrived at as resolution by the adhoc committee meetings. Resume talks and unconditionally release all those arrested in connection with the strike, so that schools can resume. He intimated that the bullets can never force back the truth in to peoples’ stomachs. In respond to a submission made by the Chairperson of the National Commission of Human Rights and Freedom accusation of the demonstrators that they do not know how to carry out a peaceful demonstration, Fru Ndi, hammered that it is not true rather those who ignite violence are the men in uniform who shoot at armless demonstrators. He posits that demonstrators begin with green leaves and when they are being shut at with life bullets, that are when they get to stones and today the rubber gun has surfaced. The torture that students in Buea were subjected to was not humane and wonders aloud that if the Head of State daughter was among those girls who were being asked to roll in the mud, Mr. Biya would have burnt down the whole nation.
In the same vein, the Director of the Center for Human Rights and peace advocacy , Chongsi Ayeah Joseph who doubles as United Nations representative in Cameroon hinted that from reports of torture perpetuated by State machinery across the country is gradually qualifying Cameroon to some day face the international Criminal Court of Justice to answer charges on human rights violations. To Fonso Michel of CONMINSUD, government should stop what he termed as State terrorism and systematic marginalization of the Anglophone Regions.
NCHRF visited all the detention centers in Bamenda to ascertain the prison conditions under which those arrested are placed. The Chairperson assured the public that the commission has been doing a lot of work reasons why there is gradual release of those who were arrested and taken to Yaounde and more to that the detention conditions in Yaounde are better that those in Bamenda. He buttressed that when any got ill, they are taken to the hospital. This issue of a mentally sick minor Kinga Valentine, who was also arrested and taken to Yaounde, as testified by his mother, Chemuta promised to work on that file to have him released. At Press time some members of the all Anglophone Trade Union suspended the Teachers’ strike that has paralyzed the two Anglophone regions in demand for educational reforms in English subsystem. This was after consultation with North West Governor with no more solidarity with other Leaders who are either in detention or are on the run from the fierce looking security forces.

<https://www.edennewspaper.net/bullets-can-never-suppress-truth-fru-ndi/>

# Military Thrash Bamenda Teachers On Their Way To Celebrate Youth Day

By Ignatius Nji

A better Youth Day celebration in Bamenda as compared to last year was clouded by unfortunate news of military having beaten teachers. Some ten teachers from Government School Menfibie in Mankon, Bamenda reportedly received merciless beatings from the military while going to participate in the Youth Day march past.
Nine of the ladies who could not bear the pains went back home from the food market spot where they unfortunately fell in the hands of the military and only Madam Che Loveline braved it to the Grandstand in tears with soiled dresses and recounted their ordeal to some curious  officials.

SDF National Chairman, Fru Ndi, who was present at the ceremony condemned in strong terms such military brutality on unarmed civilians. He wondered aloud that for teachers coming to participate in the Youth Day celebration receive beatings from the military is not normal.
“Do you think these ladies can come again to participate next time?” He asked. Fru Ndi said the spirit of Youth Day has been killed given that he saw parents marching instead of youths.
“There is need to rekindle that effervescence that used to characterise Youth Day celebration in the country,” he said.
The Chief celebrant, Governor Lele L’Afrique Adolphe expressed his satisfaction by thanking all the stakeholders who did not miss out any opportunity at making the event as grandiose as it was.
He cited the head of State’s resolve that everybody should work towards bringing to normalcy the situation in the North West and South West regions.
“Youths who are leaders in the making should work in the spirit of multiculturalism and bilingualism to have a better future,” Lele L’Afrique said.
Other activities that characterised the heavily guarded event included the handing over of prizes of excellence to outstanding youths who excelled in entrepreneurship, sports or other vocational trade.
Azanwi Terence, a designer by profession, told Eden that he started off with little and today his efforts have been recognised and a prize given to him which means any youth who is willing can also make it.
As for political party participation only a handful of CPDM youths, who took advantage of the presence of students from higher institutions transformed them to militants making a good number.

<https://www.edennewspaper.net/7828-2/>

# Another Curfew, Travel Ban Declared In NW, SW

By Ignatius Nji

The Governor of the North West region, Lele L’Afrique Adolphe, has slammed another dusk to dawn curfew and travel ban on the population of the Region.
This came on the eve on the eve of the 2018 National Youth Day celebration just hours before the Head of State’s address to the youths.
Following this curfew and travel ban, denizens of the Region are expected to be indoors as from 8 pm till 6 am and no vehicle is expected to enter or leave to another Division after 8 pm.
This came just days after the administration placed a ban on possession and use of guns within the North West region and more gun owners have been ordered to surrender their guns to the nearest administrative unit.
This is the same scenario in the South West region where a curfew has also been declared.
In the city of Bamenda at about 7 pm night marauders were seen rushing home and bar owners closing their doors. Women roasting fishing were taken aback given that they roasted fish on display and customers were rather rushing home not to be caught up by curfew.
Madam Glory, a roasted fish vendor at Mobile Nkwen lamented to Eden that with the several restrictions from both administration and extremists she may have to pack her belongings and go to the village.
“If is not curfew, it is ghost town. If it is not ghost town, it is military crackdown because gunmen passed by,” she lamented, adding that they live a life of fear daily now in Bamenda.
The popular joint at Mobile Nkwen that used to operate 24/7 is now deserted at night with no music heard late in the wee hours.
According to the Governor’s communiqué which institutes the curfew for “six days renewable,” it is to put some checks against unknown attackers whose target have been men in uniform.

<https://www.edennewspaper.net/another-curfew-travel-ban-declared-in-nw-sw/>

# 1st October Headaches & Hiccups – NW & SW In Undeclared State Of Emergency

OLYMPUS DIGITAL CAMERA

1st October Headaches & Hiccups
-NW & SW In Undeclared State Of Emergency
-Anglophone Lawyers’ Confab Banned
-Radio &TV Houses Closely Monitored
-Was Dr. E.M.L Endeley Right After All?
By Solomon Tembang

In 1958, Dr. E.M.L Endenley, one of the nation’s founding fathers said, inter alia, on the eve of the Southern Cameroons Plebiscite in 1961, “if you (Southern Cameroonians) vote for Cameroun Republic, you will invite a new system under which everyone lives in fear of the police and army. You will not be free to move about; you cannot lecture freely or discuss your political views in public;… and you can be arrested and flogged by the police and even imprisoned without a fair trial”.
Close to 60 years after, pundits now appear unanimous that Dr. Endeley’s apocalyptic and prophetic statements were nothing but the truth foretold by an inspired mind.
As has been proven in the preceding years, events have continued to show that Anglophones, rather than rejoice about this historic landmark in their lives as a free people, continue to be subjected to all forms of injustice alien to a self-acclaimed democracy.
Last Saturday another October 1, came to pass with all the headaches and hiccups usually associated with it.
Government has remained uncomfortable with 1 October especially with the recurrent struggles by the Southern Cameroons National Council, SCNC to ensure a more befitting autonomy for Anglophones within the Cameroonian nation.
Each time 1 October is approaching troops are heavily deployed to the North West and South West regions, in an effort to foil any attempt, real or imagined, by militants of the SCNC to stage celebrations of what they term the independence of Southern Cameroons. It has become routine for the SCNC to hoist flags of ‘Southern Cameroons’ in major towns of the Anglophone regions on 1 October.
It was in this light that the government last Saturday 1 October deployed battle-ready troops to the two Anglophone regions. Police and gendarmes, we learnt, virtually flooded the towns of Bamenda, Buea, Kumba, Kumbo, Limbe, Tiko, Mutengene, Mamfe etc. The North West and South West regions were on 1 October apparently in a state of undeclared state of emergency. Soldiers could be seen paraded the streets with heavy military gear.
Some of the soldiers are reported to have harassed denizens in some areas while in others their heavy presence simply made people uncomfortable.
In some town, markets and other places that attract huge gatherings of people were shutdown, bars and off licenses were instructed to close before 10pm while public manifestations were strictly prohibited by administrative authorities.

Avenue For Embezzlement?
However, pundits have been quick to point to the fact that year in year out military officials in the North West and South West regions use the 1 October controversy to instill fear in the government in Yaounde for funds to be sent to them to mobilise military resources to quell any SCNC uprising, which funds, they say, are most often embezzled. They attest that since SCNC activities on 1 October have not gone violent of late, the military operations are mostly a waste of vital government funds.

Radio & TV Houses Closely Monitored
Before, during and after 1 October, radio and TV stations mostly in the Anglophone regions, were closely monitored by the military and secret service policemen. Soldiers and policemen took strategic positions close to or at the radio and TV stations.
This was to preempt any attempt by the SCNC or other secessionists from taking over the stations to broadcast their messages. It would be recalled that in December 1999 some members of the SCNC hijacked CRTV Buea and broadcast a message declaring the independence of Southern Cameroons.
In the North West region, we learnt, the administration vowed to shut down any Radio Station that broadcast any item related to SCNC or secession.

Anglophone Lawyers’ Confab Banned
Meanwhile, Anglophone lawyers, led by Barrister Abeng Roland Dze, had planned a press conference in Douala on 1 October 2016 to focus on the need for the translation of OHADA Law into English. After being granted an authorisation by the Divisional Officer of Douala I Sub-Division, Jean Marc Ekoa Mbarga, dated 27 September 2016, the lawyers began putting finishing touches to the preparations for the event.
But to their greatest dismay, on 29 September 2016, the Divisional Officer back-pedaled, issuing an order banning the conference. The Divisional Officer, in his banning order, argued that the points raised by Barrister Abeng Roland were not convincing enough to hold the press conference on 1 October. He further warned that forces of law and order will crack down on the organisers and participants if they go ahead with the press conference.
Barrister Abeng Roland is quoted as saying the ban was a big blow to the event which was expecting about 1200 Civil and Common Law lawyers. The previewed press conference was to sound a wake-up call to all lawyers to fight for the English version of the Business Law, OHADA law.
But to Barrister Abeng Roland, it is not over yet.
“It’s simply shameful for a country that is supposed to uphold the rule of law,” he regretted.

Common Law Lawyers To Boycott OHADA Procedures
In the meantime, Common Law lawyers are threatening to boycott all OHADA-related court procedures in the North West and South West regions if the government fails to translate the law into English.
Barrister Roland Abeng in a press release dated 30 September 2016, said “the act of Cameroon government against a laudable initiative which had as main objective the promotion of an aspect of national integration through the translation and availability of our laws in both official languages is clear proof of the fact that our authorities are not matching speech with action and have no intention of listening to the cries of an entire nation”.
Saying that he would consult with the 1200 lawyers of both cultures who were already mobilised to be part of the press conference on the way forward, Barrister Abeng Roland stated that they will be faced with “boycotting all OHADA-related court procedures in the North West and South West regions until the translation of the OHADA texts and the convening of an extra-ordinary General Assembly of the Cameroon Bar Association to discuss the issue”.

Two Million Signatures For Independence?
It would also be recalled that recently one of the main protagonists in the struggle for Southern Cameroons independence, Mola Njoh Litumbe, disclosed that just two million signatures were needed for Southern Cameroons to gain independence.
Southern Cameroons became part of Cameroon on 1 October 1961. But since then a cross-section of the Anglophone population have advanced socio-economic, political and cultural negligence on the part of their Francophone brothers. The SCNC has since declared its intensions for Southern Cameroons to back out of the union, which they say, is an unholy one. They argue that there are no legal documents binding Southern Cameroons and La Republique du Cameroun together.

<https://www.edennewspaper.net/1st-october-headaches-hiccups/>

1. **A Run Down Of Anglophone Lawyers’ Conclave With PM Yang As narrated by FAKLA President**

We were informed on Thursday evening by Barrister Bobga Harmony, President of North West Lawyers Association, NOWELA, that the Prime Minister wants to meet with Common Law Lawyers who called for the strike action in Bamenda on Friday at 9 AM.

In line with our last Mutengene resolutions that we intend to meet only with the Prime Minister and either in Buea or Bamenda, a delegation made up of President NKONGHO FELIX AGBOR, BCM NJUALEM CHARLES, BCM NTOKO JUSTICE AND ASOH EPEY left for Bamenda on Friday at 3 AM.
We got to Bamenda and realised that the PM invited us and other groupings like Teachers, Fons, Clergymen, Politicians etc.
The PM also decided to receive these various groupings separately.
Eleven lawyers went into meeting with the PM whilst the others present waited outside.
The PM opened the discussions by saying that the meeting is upon instructions from the Head of State to know exactly our worries and open dialogue with the lawyers.
During the discussions, all our problems which have been expressed in our various resolutions, communiques and declaration were presented to the PM by the various speakers (lawyers) who took the floor.
On Federalism, the PM said neither he nor any other minister is competent to discuss it because it’s a political issue. He, however, agreed that, though legal, the issue of Federalism is a political issue and he will like us to concentrate on the other worries.
He acknowledged that most of the issues raised are genuine and we should not cease to demand for them and we should seek a broad-based discussion on them so that lasting solutions can be arrived at.
He promised to make a statement on the ill-treatment of lawyers next week and equally that we should give him up to Friday next week to resolve the wig and gown issue.
On the banning and suspension of our associations, he said he will equally look into same but advised that the associations which are not registered with the administration should do so. He said he was not comfortable with the creation of Common Law Bar Association because the present Bar Law has to be modified before we create the Common Law Bar and not the reverse. He, however, said from our explanations he on a personal note thinks a Common Law Bar is a brilliant idea.
The issue of transfer of civil law magistrates was elaborately discussed and the PM sought to know the problems created and how feasible the transfers were to be done. We explained and he said we should rest assured that he is taking that seriously but did not promise any immediate solution.
The PM showed some instructions from the Head of State to the effect that all laws must be published in both English and French. He, however, acknowledged that there have been some lapses and same shall be cured.
On the creation of Law School, the PM said it’s a great idea but the modalities must be put in place in subsequent consultative meetings with all judicial actors before same can be created.
Gentlemen, it was a 2 hours plus meeting and it’s difficult to put everything down over this medium.
Generally the PM was gentlemanly and listened carefully to our worries. He asked questions and equally answered questions from us. He made it clear that he and the entire government are open to dialogue and ready to seek lasting solutions to our problems. He advised us to ask for broad-based discussions and not to sideline our titular ministry.
The PM expressly acknowledged that there is an Anglophone problem and that to him all what Paul Atanga Nji said is not the government position.
My opinion is that the PM as a politician did well in the meeting.
That it’s a plus for us that the PM left Yaounde to talk to us at our base.
That we should wait as he promised for the outcome of our meeting by Friday next week.
At the end of the meeting, our leaders decided that the strike continues until we see the manifestation of good faith and some actions carried out by the government to resolve our worries.
Thanks

Barrister Felix Agbor Nkongho
President
Fako Lawyers Association, FAKLA

<https://www.edennewspaper.net/6995-2/>

1. **SDF Accuses Govt Of Attempting To Kill Fru Ndi**

By Ndi Eugene Ndi
The Social Democratic Front, SDF, has accused state security operatives of attempting to kill its National Chairman, Ni John Fru Ndi. The leading opposition party said several life bullets were fired into Fru Ndi’s Bamenda residence last Wednesday.
“This constitutes a clear attempt on his [Ni John Fru Ndi] life and that of his family,” a statement by SDF Members of Parliament said.
Tension has been rising in the opposition stronghold of Bamenda since Monday 21 November following a confrontation between anti-riot soldiers and unarmed civilians who joined Anglophone teachers in a protest against government’s posting of Francophone teachers in English speaking schools of the North West and South West regions.
“Francophone teachers don’t master our [Anglo-Saxon] system of education. They have been destroying our children,” said Tassang Wilfred, Secretary General of the Cameroon Teachers’ Trade Union (CATTU); one of the leaders of the strike.
At least one person was killed during the demonstration in Bamenda on Monday 21 November.
Anglophone lawyers in the country have also been protesting among others against the deployment of Francophone judges who did not study the British Common Law to courts in the two regions.
“We fully support these strike actions which constitute a legal and constitutional weapon of expression of grievances in a country that purports to respect the rule of law,” the SDF pledged in the statement signed by Hon Dr Joseph Bandzem Lukong, the party’s parliamentary group leader at the National Assembly.
Cameroon has ten semi-sovereign administrative regions (formerly called provinces) with eight predominantly French speaking.
Anglophones in the country have held grudges against their Francophone brothers for duping them in a post-independence reunification deal where they expected to be equal partners. They often complain of being treated as second-class citizens.
According to the national legal adviser of the SDF party, Cameroon from inception was made up of two entities; the Southern Cameroon and East Cameroon. This according to him was a fundamental principle that the two legal systems just like the educational system would be maintained and they will evolve side-by-side.
“But today we are witnessing a dangerous situation that is prejudicial to the peace and unity of this nation,” Hon Joseph Mbah Ndam, himself a lawyer, said of the strikes.

<https://www.edennewspaper.net/sdf-accuses-govt-of-attempting-to-kill-fru-ndi/>

1. **PM Yang Meets Trade Unionists, C L lawyers, Maintains Government Rigid Position On Anglophone Problem**

-Prof Fame Ndongo Commission Fired Gives Way To Few Framework

-Would Suspend Strike When At least 1/11 Demand Is Implemented
-CL Lawyers Demand Dismantle Of Min. Laurent Esso’s Rock Wall For Dialogues
By Ignatius Nji

NOWELA President Barrister Bobga, Chairman Fru Ndi after meeting PM Yang
Prime Minister Yang Philemon after meeting with Teachers Trade Union Leaders and common Law Lawyers in Bamenda in a two days consultation and dialogue sessions arrived at a truce with an eight point agenda which implementation takes off latest Wednesday November 30 2016. They agreed in a signed document that a new institutional framework to look into the problems raised by Anglophone Teachers trade unions will be put in place by Wednesday 30 and would be enlarged to include all Anglophone education forum, agencies, Catholics, Presbyterian, Baptist, lay Private, Islamic, Apostolic, Full Gospel and that the Framework will meet and work in Bamenda for convenience of the majority.
Apart of meeting with trade Unions and Common Law Lawyers who were the main concerns, PM Yang started off by granting audiences to political party Leaders and traditional Rulers and Clerics of the Various Denominations in the North West Region. All in a bid to seek for dialogue on the Anglophone problems as tabled by Teachers Trade Unions and Common Law Lawyers. The two days meeting aimed at finding lasting solution to the many plights presented by both Teachers and Common Law lawyers, government was blamed for always looking low on the plight of the people and worst still most government Ministers do not open up for any dialogue which are steps toward seeking lasting solution. They however lauded PM Yang for coming down to meet them and listen to their plight.
Much against expectation of all the trade unions leaders and CL lawyers, PM Yang decided to receive each pressure group in isolation as against an open confab with all in one room. Much to the chagrin of other participants, the Prime Minister started by receiving a CPDM central committee delegation and thereafter the Traditional rulers and Clerics before receiving the Teachers and Lawyers who are the principal concerns. All those who met the Prime Minister on Friday at Ayaba hotel, came out more frustrated than they went in given the rigidity position of government which is not ready to bulge from the present state of system. Tassang Wilfred, ESG of CATTU declared that this was a cause that he is prepared to die for and described the meeting on the first day as a stalemate. There on the dialogue ground, CATTU ESG received several threat messages from security operatives with one stating that he should not sleep in his house.
According to the various leaders, the PM tried to coerced them in to suspending the strike action but not giving in to any of their demands. The lawyers who have been in to this sit in strike for seven weeks now told the PM that the solution to all these problems, is for the country to go back to the Federal system of government. Other syndicates who represent other interest groups like drivers, bike riders, etc reminded the Head of government that they did not begin the strike and have no powers to call it off and that their position as it stands is that they are in support of the lawyers and Teachers who are articulating problems that affects all. They pleaded with PM Yang and his government to give a listening ear to the plight and give in to the call for federalism. PEATTU President Afu Stephen acknowledged the open mindedness of PM Yang who gave a listening ear though he did not give in to some of the immediate demands raised which could lead to suspension of the strike. This pivotal demand was to have French speaking Teachers in all Anglophone schools redeployed to their areas of competence but the PM said that would be difficult at this particular point in time. The Trade Union leaders debunked the xenophobia syndrome that was being circulated by some regime cronies to give a bad connotation to their plight. They told the PM that Anglophones and Francophones have no problem living together and they are living in peace.
Enter Chairman Fru Ndi
After meeting the Prime Minister expressed his disappointment to Pressmen saying, “I feel very sorry for a person like Nji Atanga for the statement he made. When he tells the world that the gentleman who got so angry and marched down the streets should give himself to the Police, let him give himself to the Police first. He said Anglophones have no problems, yes he said that because every trip Mr. Biya makes out of the country he takes him, if he is out for three weeks he will be there sleeping in porch hotels with very good food and all the like. So that is why he can say there are no problems because he does not have a problem. His children go to the best schools, he sleeps in best hotels and so how do you think that he can tell you that there is a problem in Bamenda? How often does he come to Bamenda, for how long has he ever stayed in Bamenda.” Fru Ndi questioned.
On his part Fon Abumbi II of Bafut said, “As an educationist who owns a Technical school I regret that if the statistics of ENSET Kumba and Bambili are true as given by Teachers then the purpose for which these schools were created has failed. I acknowledge that there is an Anglophone problem which should be addressed and what we do not stand for is secession.”
Barrister Bobga Harmony says the Common Law Lawyers are open for dialogue but the Minister of Justice has built a wall around him yet expects them to have a talk with him. He called on PM Yang to instruct his Minister to remove the wall if at all they are ready for any talk and if not they the Lawyers shall proceed to have redress at international courts where Cameroon is a signatory. On the question as to whether they are operating in illegality, Barrister Bobga reiterated that they are not operating in illegality as claimed by some quarters hear him, “They say that we are operating in illegality but I tell you we are not operating in illegality. That is a conflicting situation now that needs to be debated and concluded either through dialogue or through justice. A referendum is a process to get Federalism. The strike continues and it is a sit in strike, the soldiers can go home.”
The Executive President of the Cameroon Baptist Church, Rev. Ncham Godwill rather appreciated the Prime Minister coming down to listen to the concerns which to him is a milestone in dialogue towards finding lasting solution. And on a personal opinion he thinks that it were best the plights are look in to for schools to resume.
After the Saturday meeting which drew a curtain to the talks pending implementation of an eight point agreement, ESG Tassang Wlifred told Newsmen that they are satisfied with the outcome of the meeting with PM Yang saying, they have eleven worries that would be looked in to with reports from the new institutional framework to would be set up by Wednesday November 30. He assured parents and the general public that the strike action which is still on would only be suspended if powers that be fulfill at least one of the eleven points with clear cut time frame within which the rest shall be implemented. That notwithstanding, Tassang Wilfred the suspension of the strike can be revoked anytime there is a breach on the agreement. The document was signed by Ghogomu Paul Mingo Director of Cabinet at Prime Minister’s office, Governor Lele Adolphe L’Afrique, Abangma J.A SYNES UB, Ngange Tatah SYNEC UB, Tassang Wilfred CATTU, Ayeah Emmanuel BATTUC, Afu Stephen PEATTU, Kimfon Michael CEWOTU, Tameh Valentine TAC.

“I feel very sorry for a person like Nji
Atanga for the statements he made.
When he tells the world that the
gentleman who got so angry and
marched down the streets should give
himself to the Police, let him give
himself to the Police first. He said
Anglophones have no problems, yes he
said that because every trip Mr. Biya
makes out of the country he takes him,
if he is
out for three weeks he will be there
sleeping in porch hotels with very good
food and all the like. So that’s why he
can say that there are no problems
because he doesn’t have a problem. His
children go to the best schools, he sleeps
in best hotels and so how do you think
that he can tell you that there is a
problem in Bamenda? How often does
he come to Bamenda, for how long has
he ever stayed in Bamenda.” Fru Ndi
questioned.
…………………..
Philemon Yang Fails to Convince in Round One
The Prime Minister, Head of Government is unable to leave Bamenda this morning, because all his efforts yesterday yielded no results. Despite aligning with the common law lawyers and teachers finally, all Yang’s promises were seen as only promises and the people insisted on clear timelines for implementation which must happen before the striking parties start thinking of returning to work.
The PM’s task is even made harder as the people say he cannot be on the field negotiating while his ministers, among them a certain Atanga(na) Paul Nji go on a smear campaign on Anglophone, trying to denigrate the cause.
We shall return with details as negotiations resume at 9.30am. For now the strike actions are maintained! SDF MPs may take to the streets in Bamenda on Monday.

<https://www.edennewspaper.net/pm-yang-meets-trade-unionists-c-l-lawyers-maintains-government-rigid-position-on-anglophone-problem/>

1. **Prime Minister Yang Admits Anglophone Problem Exists**

-Dismisses Atanga Nji’s Ranting
-Dissolves Fame Ndongo Commission For New Framework
-Strike Continues Indefinitely
-Lawyers Say Laurent Esso’s Arrogance Is Killing Dialogue
-A 10 Point Consensual Agenda Agreed With Teachers
By Ignatius Nji

As lawyers and teachers of English language expression continue their strike actions over issues affecting the Anglophone legal and educational sectors, Prime Minister Philemon Yang has admitted that the Anglophone problem truly exists, contrary to views by some Cameroonians both Anglophone and Francophone that it does not.
Prime Minister Yang made this assertion in Bamenda over the weekend during two days of consultation and dialogue with Common Law lawyers, teachers, traditional rulers and religious authorities.
During the meeting with lawyers, Prime Minister Yang dismissed a recent statement by Paul Atanga Nji, Minister of Special Duties at the Presidency, who said in interviews with state radio, CRTV and the National Bilingual Daily, Cameroon Tribune, that there was no such thing as an Anglophone problem. Yang reportedly told the lawyers that that “to him all what Paul Atanga Nji said is not the government position”.
Meanwhile, Prime Minister Yang Philemon, after meeting with Teachers Trade Union Leaders and Common Law Lawyers a truce was arrived with a 10-point consensus agenda which implementation takes off latest Wednesday 30 November 2016.
They agreed in a signed document that a new institutional framework to look into the problems raised by Anglophone Teachers trade unions will be put in place by Wednesday 30 November and would be enlarged to include all Anglophone education forum, agencies, Catholics, Presbyterian, Baptist, lay Private, Islamic, Apostolic, Full Gospel and that the Framework will meet and work in Bamenda for convenience of the majority.

Strike Continues Indefinitely
However, the teachers are lawyers after leaving the meeting said the strike still continues until concrete action on the consensual agenda agreed upon have been seen.
Lawyers Say Laurent Esso’s Arrogance Is Killing Dialogue
Meanwhile, the lawyers are said to have told the Prime Minister that the Minister of Justice Laurent Esso, was killing dialogue with his “arrogance”. They reportedly told the Prime Minister that they were ready for dialogue him Minister Laurent Esso removes the wall he has put around himself.
Apart from meeting with trade Unions and Common Law Lawyers who were the main concerns, PM Yang started off by granting audiences to political party leaders and traditional rulers and clerics of the various denominations in the North West Region. This was in a bid to seek for dialogue on the Anglophone problems as tabled by Teachers Trade Unions and Common Law Lawyers.
The two-day meeting, from Friday 25 to Saturday 26 November, was aimed at finding lasting solutions to the many plights presented by both Teachers and Common Law lawyers. Government was blamed for always looking low on the plight of the people and worst still most government Ministers do not open up for any dialogue which are steps towards seeking lasting solution. They, however, lauded PM Yang for coming down to meet them and listen to their plight.
Much against expectation of all the trade unions leaders and Common Law lawyers, PM Yang decided to receive each pressure group individually as against an open confab with all in one room. Much to the chagrin of other participants, the Prime Minister started by receiving a CPDM Central Committee delegation and thereafter the traditional rulers and clerics before receiving the teachers and lawyers who are the main protagonists.
All those who met the Prime Minister on Friday at Ayaba hotel, came out more frustrated than they went in given the rigidity position of government which is not ready to bulge from the present state of system.
Tassang Wilfred, Executive Secretary General of CATTU declared that this was a cause that he is prepared to die for and described the meeting on the first day as a stalemate.
According to the various leaders, the PM tried to coerced them into suspending the strike action but not giving into any of their demands. The lawyers, who have been on strike for seven weeks now told the PM that the solution to all these problems, is for the country to go back to the Federal system of government.
Other syndicates who represent other interest groups like drivers, bike riders, etc reminded the Head of government that they did not begin the strike and have no powers to call it off and that their position as it stands is that they are in support of the lawyers and teachers who are articulating problems that affects all. They pleaded with PM Yang and his government to give a listening ear to the plight and give in to the call for federalism.
But the Prime Minister is reported to have said he has no competence to discuss the issue of federalism because it is a political one.
PEATTU President, Afu Stephen, acknowledged the open mindedness of PM Yang who, he said, gave a listening ear “though he did not give in to some of the immediate demands raised which could lead to suspension of the strike”. This pivotal demand was to have French speaking teachers in all Anglophone schools redeployed to their areas of competence. But the PM said that would be difficult at this particular point in time.
The Trade Union leaders debunked the xenophobia that was being circulated by some regime cronies to give a bad connotation to their plight. They told the PM that Anglophones and Francophones have no problem living together and they are living in peace.

Enter Chairman Fru Ndi
After meeting the Prime Minister the Chairman of the Social Democratic front, John Fru Ndi, expressed his disappointment to journalists.
“I feel very sorry for a person like Atanga Nji for the statement he made. When he tells the world that the gentleman who got so angry and marched down the streets should give himself to the police, let him (Nji) give himself to the police first. He said Anglophones have no problems, yes he said that because every trip Mr. Biya makes out of the country he takes him. If he is out for three weeks he will be there sleeping in luxurious hotels with very good food and all the like. So that is why he can say there are no problems because he does not have a problem. His children go to the best schools, he sleeps in best hotels and so how do you think that he can tell you that there is a problem in Bamenda? How often does he come to Bamenda, for how long has he ever stayed in Bamenda,” Fru Ndi questioned.

There Is An Anglophone Problem- Fon Abumbi
On his part, Fon Abumbi II of Bafut said, “As an educationist who owns a Technical school I regret that if the statistics of ENSET Kumba and Bambili are true as given by teachers then the purpose for which these schools were created has failed. I acknowledge that there is an Anglophone problem which should be addressed and what we do not stand for is secession.”

‘Let Laurent Esso Remove wall Around Himself’
Barrister Bobga Harmony, who led the lawyers to the meeting, said the Common Law Lawyers are open for dialogue but the Minister of Justice, Laurent Esso, has built a wall around himself “yet expects us to have a talk with him”. Bobga called on PM Yang to instruct Esso to remove the wall if at all they are ready for any talk and if not they the Lawyers shall proceed to have redress at international courts where Cameroon is a signatory.

‘Lawyers Not Operating In Illegality’
On the question as to whether they are operating in illegality, Barrister Bobga reiterated that they are not operating in illegality as claimed by government officials.
“They say that we are operating in illegality but I tell you we are not operating in illegality. That is a conflicting situation now that needs to be debated and concluded either through dialogue or through justice. A referendum is a process to get federalism. The strike continues and it is a sit in strike, the soldiers can go home,” Barrister Bobga stated.
The Executive President of the Cameroon Baptist Church, Rev. Ncham Godwill, rather appreciated the Prime Minister for coming down to listen to the concerns which, to him, is a milestone in dialogue towards finding lasting solution. And on a personal opinion he thinks that it were best the plights are looked into for schools to resume.

10-Point Consensus Agreement
After the Saturday meeting which drew a curtain to the talks pending implementation of an eight point agreement, CATTU Executive Secretary, Tassang Wilfred, told journalists that they are satisfied with the outcome of the meeting with PM Yang. He added that they have eleven worries that would be looked into with reports from the new institutional framework to be set up by Wednesday 30 November.
He assured parents and the general public that the strike action which is still on would only be suspended if powers that be fulfill at least one of the eleven points with clear-cut timeframe within which the rest shall be implemented.
That notwithstanding, Tassang Wilfred, stated that the suspension of the strike can be revoked anytime there is a breach of the agreement. The document was signed by Ghogomu Paul Mingo, Director of Cabinet at Prime Minister’s office; Governor Lele Adolphe L’Afrique; Abangma J.A; SYNES UB, Ngange Tatah SYNEC UBa, Tassang Wilfred, CATTU; Ayeah Emmanuel, BATTUC; Afu Stephen, PEATTU; Kimfon Michael, CEWOTU; Tameh Valentine; TAC.

<https://www.edennewspaper.net/prime-minister-yang-admits-anglophone-problem-exists/>

1. **Anglophones Are Conquered People -Prince Ndoki Mukete**

**By Kowac K. K. Bandolo**

Contrary to other declarations made by frontline Anglophone speakers and the Paramount Chief of the Bafaws, Senator Nfon V.E. Mukete, giving meaning to the reunification debate and justifying its historical relevance, the Ordained Prince of the Bafaw land and one-time SDF Advocate for “equal opportunities to all and sundry”, Ndoki Mukete, has spoken out

 In a series of press talks to local radios in his present domicile, Kumba, the celebrated civil society activist and decamped SDF militant maintained that the Anglophones of the South West and North West Regions have never enjoyed complete marriage with their counterparts of the East Cameroon. To him, they are just a conquered people playing for time and waiting for the economic and social detects/fall-outs from the master. Like Mola Njoh Litumbe, he said there was an unholy marriage between the two Cameroons called.

Talking on frank-talk, the prince regretted the fact that those leading the Anglophone cause are sterile and impotent because of greed and cannot speak the truth and be flushed out.

Down memory-lane, the veteran journalist cum farmer remembered how the process of reunification unfolded under his watchful eyes. The process, according to him, took place in Kumba with his father chairing the sessions. The strong points for or against were adopted in Kumba where the likes of Hon J.N. Forcha, S.T. Muna, E.M.L Endelley, J.N. Ntumazah and others made valid contributions. The spirit for a very strong Cameroon triumphed which led to the unanimous decision for a united Cameroon. Though the decision was virtually concluded in good faith, the prince argued that the Anglophones integrity was not protected. And like a house without ventilation, the reunification process later faced much pressure and heat as seen in today’s setting where the centre can no longer hold. Putting these pieces of evidence together, the prince in his radio talk-show, submitted that Anglophones are a conquered people where their say as a one-time independent group has been silenced and they are forced to dance to the whims and caprices of their one-time partners turned master.

Describing his position as an adult and responsible for his actions, Prince Ndoki Mukete took a look at the appointments in the government of the day and the public service. In these services, he said merits and career profile were never considered and in the mess, junior and inexperienced staff were appointed to boss their very experienced and long-serving fathers. He styled the practice bad and a misrepresentation of hierarchy.

About Kumba and why Kumba is best placed to host the reunification feast, the prince conflicted with his brother, Senator Nfon V.E. Mukete by saying that Kumba set the basis for reunification by reuniting all the actors under its roof. Prince Ndoki Mukete frowned at the fall-outs of the feast which are centered on street lights. He saw no meaning in the street-lights which are today a danger to the road-

<https://www.edennewspaper.net/anglophones-are-conquered-people-prince-ndoki-mukete/>

1. **Anglophone MPs Seek Clarity In Reunification Deal**

**By Elias Ntungwe Ngalame**

Anglophone Members of Parliament preponderantly of the SDF party have called on President Paul Biya to seize the opportunity of the celebration of Cameroon’s 5Oth anniversary of reunification in Buea to heal the wounds and bridge the gap between English and French-speaking Cameroonians that has deepened over the years.

The MPs, in a memo to the Head of State via the head of government, Philemon Yang, last week ahead of the reunification celebrations, said it was time the systematic oppression and inhumane treatment meted on English-speaking Cameroonians in their homeland come to an end. The memo particularly decried persistent attempts by some francophone government authorities to ‘kill’ the Anglophone education system.

“After sustained consultations with many Anglophone education stakeholders, and convinced of the display of bad faith by government in general and educational authorities in particular despite countless memos addressed to them especially by the Anglophone teachers trade unions on urgent issues plaguing our educational setup, we, Anglophone Members of Parliament have resolved to draw the attention of the Head of State, the Prime Minister and the Government, especially the Ministers of Secondary and Higher Education to the following legal provisos, anomalies and injustices against Anglophones:

The Prime Ministerial Committee recommendation of September 1992, “that Cameroon’s dual system of education be helped to develop its distinctive characteristics”;

The proceedings of the 1995 Forum on Education, whose final report submitted in Yaoundé 27 May 1995, prepared the groundwork for the Education Law in Cameroon;

This Law of Education, No 98/004 of 14 April 1998, governing education in Cameroon;

The fact that this law, especially in Sections 4, 5, 11, 15, 16, 17, 20 and 25, defines the orientation of our country’s educational system;

The fact that Section 15 sub one highlights the existence of two Cameroonian sub-systems, English and French-speaking, thus laying emphasis on our bicultural heritage;

Section 15sub two of this same law, which asserts that both subsystems shall coexist, “each preserving its specific method of evaluation and award of certificates”;

The surprising anomaly that the Cameroon GCE Board, which was created to handle all Anglophone examinations, today continues to manage only the GCE Technical examination, an infinitesimally small part of what is the Anglophone technical examination heritage.

The scandalous fact that the Cameroon GCE Board only receives and is expected to administer without moderating, technical examinations prepared by MINESEC, with untold negative consequences like the case of the 2013 Probatoire examination in which the Biology question paper was served to candidates with its marking guide behind;

The outrageous abnormality that these examinations – CAP, Probatoire and  BAC – are, from all indications, set in French over the years and poorly translated, with wanton errors and inexcusable presentation flaws, and with the inevitable outcome of injustice done to the English speaking candidates of these examinations;

The scandalous fact that English-speaking learners in technical colleges continue to be subjected to the injustice of having to sit for CAP, Probatoire and Baccalaureat, French-oriented examinations, in a global context where Anglo-Saxon technical examinations like the City and Guilds, the LCCI, the different RSAs, etc are vogue, and contrary to the provisions of the 1998 Law of Education cited above,” the memorandum stated.

They also requested President Paul Biya to respect the regional balance quota established by late President Ahmadou Ahidjo in appointments and admissions into professional schools and the military as revealed in a report by General Semengue published in L’oeil du Sahel. The regional quota, accordingly, had attributed 15% to the North West and South West.

The Head of State was equally reminded in the memo that there was no constitutional provision that pinned Anglophone Cameroonians to the position of assistant directors or managers or coming second to a francophone in appointments as the ongoing dispensation in positions of responsibility in the country seem to portray.

It is believed that the Head of State will carefully study the grievances contained in the memorandum and address them in Buea accordingly.

<https://www.edennewspaper.net/anglophone-mps-seek-clarity-in-reunification-deal-2/>
