# Supplementary material
Source: Research Square preprint supplement (doi:10.21203/rs.3.rs-8545290/v1)
Supplement: Supplementary file 4 [file 4e63c6f37a281072211a39a3.docx]

1. **Crise anglophone : Une femme enceinte décède en captivité dans le Nord-Ouest**

[**Alain Basile DJOMO.237online.com**](https://www.237online.com/author/alain-basile-djomo/)21 décembre 2020

 Temps de lecture 1 minute

D’après les informations recueillies ce jour, une femme enceinte est décédée en captivité dans le Nord-Ouest.

Il s’agit de la jeune Robertine LEINYUY. Celle-ci avait été kidnappée par des hommes armés, appartenant certainement aux mouvements sécessionnistes, il y a quelques semaines dans le village Ntseny dans le département du Bui. Arrêtée en compagnie de 02 autres dames, elle était accusée d’être une informatrice des forces de sécurité. Âgée de 24 ans, l’otage a été torturée à mort par ses ravisseurs alors même que ses 02 autres compagnes d’infortune ont été relâchées.

Ce drame survient quelques jours seulement après qu’un Chef traditionnel soit mort dans le Sud-Ouest dans des circonstances presque identiques. En effet Chief Dibanda, mort en captivité, faisait partie de trois chefs de quartier kidnappés dans la ville chef-lieu de la Région du Sud-Ouest par des séparatistes présumés. Ils avaient été capturés alors que le défunt inaugurait un nouveau bâtiment de sa Chefferie. Si les Chefs de mille 15 et mile 16, ont eu la chance d’être libérés, ce ne sera pas le cas pour leur pair de mille 14, qui malheureusement est passé de vie à trépas, le 13 décembre dernier.

Comble d’ignominie, la disparition tragique du Chef Dibanda, survient un mois seulement après l’assassinat dans son palais de Sa Majesté Molinga Francis Nangoh, Roi de Liwu La Malale, village dans le département de Fako, Région du Sud-Ouest. Depuis la survenue de cette guerre issue de la crise anglophone, il a aujourd’hui 4 bonnes années, les populations civiles sont celles qui payent le plus lourd tribut, notamment avec des milliers de morts, et des déplacés internes et externes effleurant le million. Dommage que ni le Grand Dialogue National, et encore moins les mesures prises par le gouvernement n’aient pu mettre un terme à cette guerre fratricide.

<https://www.237online.com/crise-anglophone-une-femme-enceinte-decede-en-captivite-dans-le-nord-ouest/>

1. **Cameroun-Crise anglophone : 3 soldats tués par les séparatistes**

[**Franck Daniel Batassi.237online.com**](https://www.237online.com/author/franck-daniel-batassi/)27 novembre 2020

 Temps de lecture 1 minute

[Pinterest](https://pinterest.com/pin/create/button/?url=https://www.237online.com/cameroun-crise-anglophone-3-soldats-tues-par-les-separatistes/&description=Cameroun-Crise%20anglophone%20%3A%203%20soldats%20tu%C3%A9s%20par%20les%20s%C3%A9paratistes&media=https://www.237online.com/wp-content/uploads/2018/12/Dr-Sako-ambazonie.jpg) [Reddit](https://reddit.com/submit?url=https://www.237online.com/cameroun-crise-anglophone-3-soldats-tues-par-les-separatistes/&title=Cameroun-Crise%20anglophone%20%3A%203%20soldats%20tu%C3%A9s%20par%20les%20s%C3%A9paratistes)

Les 3 vaillants éléments des forces de défense camerounaise ont rendu l’âme, au cours des échanges de coups de feu avec les séparatistes.

L’armée camerounaise en deuil. Celle-ci vient de perdre des éléments. Hier, jeudi 26 novembre 2020, trois hommes appartenant au 21ème bataillon des fusillés marins ont perdu leurs vies, après avoir succombé à leurs blessures respectives. Ces derniers ont été grièvement été blessés par balle dans une embuscade tendue par des séparatistes. Les faits se sont déroulés dans la commune d’Ekondo Titi (département du Ndian, région du Sud-Ouest).

Les hors-la-loi ont emporté avec eux les armes à feu des défunts.

Selon le préfet de la localité, les victimes effectuaient des opérations de surveillance ce jour-là lorsqu’ils sont tombés dans une embuscade. Et c’est ainsi qu’il s’en est suivi un échange de coups de feu.

Les recherches sont en cours afin de retrouver les auteurs de cette attaque. Affaire à suivre !

<https://www.237online.com/cameroun-crise-anglophone-3-soldats-tues-par-les-separatistes/>

1. **Crise anglophone : Épeuré, le Cardinal Tumi demande l’amnistie générale et le retour de l’armée dans les casernes**

[**Alain Basile DJOMO.237online.com**](https://www.237online.com/author/alain-basile-djomo/)16 novembre 2020

 Temps de lecture 1 minute

[Pinterest](https://pinterest.com/pin/create/button/?url=https://www.237online.com/crise-anglophone-epeure-le-cardinal-tumi-demande-lamnistie-generale-et-le-retour-de-larmee-dans-les-casernes/&description=Crise%20anglophone%20%3A%20%C3%89peur%C3%A9%2C%20le%20Cardinal%20Tumi%20demande%20l%E2%80%99amnistie%20g%C3%A9n%C3%A9rale%20et%20le%20retour%20de%20l%E2%80%99arm%C3%A9e%20dans%20les%20casernes&media=https://www.237online.com/wp-content/uploads/2020/11/christian-Tumi-libre.jpg) [Reddit](https://reddit.com/submit?url=https://www.237online.com/crise-anglophone-epeure-le-cardinal-tumi-demande-lamnistie-generale-et-le-retour-de-larmee-dans-les-casernes/&title=Crise%20anglophone%20%3A%20%C3%89peur%C3%A9%2C%20le%20Cardinal%20Tumi%20demande%20l%E2%80%99amnistie%20g%C3%A9n%C3%A9rale%20et%20le%20retour%20de%20l%E2%80%99arm%C3%A9e%20dans%20les%20casernes)

10 jours après son enlèvement, il s’est confié à nos confrères de Radio France Internationale.

Après quelques jours de repos et d’examens médicaux, l’Archevêque émérite de Douala a accepté de s’exprimer, après le bref enlèvement qu’il a subi les 5 et 6 novembre dernier. Comme il est connu de tous, il avait été kidnappé à Kumbo dans la Région anglophone du Nord-Ouest, alors qu’il était en compagnie du Fon des Nso, par des hommes se présentant comme des indépendantistes anglophones. Le Cardinal Tumi aujourd’hui âgé de 90 ans a toutefois assuré avoir été traité avec respect par les terroristes.

Il affirme avoir parlé politique avec ces derniers. Le prélat le plus capé de l’église Catholique Romaine au Cameroun appelle désormais le Président Paul Biya à jouer la carte de l’apaisement dans les Régions anglophones, une zone déchirée par des années de conflit. *« Ils voulaient savoir ce qu’est mon opinion sur la forme de gouvernement du pays. Je leur ai dit, c’est le fédéralisme. Et ils ont dit non, qu’ils veulent que je fasse tout pour le retour du Southern Cameroon, je leur ai dit non. J’étais comme eux, j’étais un jeune homme à la réunification, que nous avions la paix à la réunification. »*, a déclaré le Cardinal Christian Tumi au cours d’une interview accordée à Radio France Internationale ce lundi 16 novembre 2020.

Cependant l’Archevêque émérite de Douala ne s’est pas arrêté en si bon chemin. Il a terminé son témoignage en proposant au Président de la République une voie de sortie pour cette crise qui perdure depuis quatre années déjà : « Je crois que c’est au Chef de l’État*maintenant de faire quelque chose. Je crois qu’il peut le faire, c’est-à-dire déclarer l’amnistie pour qu’il aie la paix, et pour que les enfants aillent à l’école, que les salles de classe soient remplies par les enfants. Il faut que l’armée rentre dans les casernes, et que ses garçons là déposent les armes »*.

<https://www.237online.com/crise-anglophone-epeure-le-cardinal-tumi-demande-lamnistie-generale-et-le-retour-de-larmee-dans-les-casernes/>

1. **Cameroun – Crise anglophone : Des séparatistes ayant décapités un enseignant arrêtés**

[**Franck Daniel Batassi.237online.com**](https://www.237online.com/author/franck-daniel-batassi/)5 septembre 2020

 Temps de lecture 1 minute

[Pinterest](https://pinterest.com/pin/create/button/?url=https://www.237online.com/cameroun-crise-anglophone-des-separatistes-ayant-decapites-un-enseignant-arretes/&description=Cameroun%20%E2%80%93%20Crise%20anglophone%20%3A%20Des%20s%C3%A9paratistes%20ayant%20d%C3%A9capit%C3%A9s%20un%20enseignant%20arr%C3%AAt%C3%A9s&media=https://www.237online.com/wp-content/uploads/2020/06/separatistes-anglophones-de-bafut.jpg) [Reddit](https://reddit.com/submit?url=https://www.237online.com/cameroun-crise-anglophone-des-separatistes-ayant-decapites-un-enseignant-arretes/&title=Cameroun%20%E2%80%93%20Crise%20anglophone%20%3A%20Des%20s%C3%A9paratistes%20ayant%20d%C3%A9capit%C3%A9s%20un%20enseignant%20arr%C3%AAt%C3%A9s)

La légion de gendarmerie de la région du Nord-Ouest a présenté à la presse, ce vendredi 4 septembre 2020, des hommes suspectés d’appartenir à des groupes séparatistes.

Mauvaise journée pour une bande d’individus accusés d’avoir contribué à l’élaboration de nombreux actes crapuleux, dont le meurtre d’un enseignant, il y’a quelques mois, dans la région du Nord-Ouest qui, comme celle du Sud-Ouest, est devenu, depuis plusieurs années, le théâtre d’un carnage commis par certains compatriotes de culture anglophone qui se disent marginalisés par les francophones. Les présumés semeurs de troubles ont donc été sous les projecteurs de l’actualité dans l’après-midi du vendredi 4 septembre 2020.

Le coup de filet est le fruit d’une collaboration en parfaite synergie entre la gendarmerie de légion du Nord-Ouest et la population de la commune de Widikum (département de la Momo). «*C’est l’occasion pour nous de saluer cette collaboration naissante et forte avec la population qui ne ménage plus aucun effort »,* déclare le commandant de la légion de gendarmerie de cette partie du pays.

<https://www.237online.com/cameroun-crise-anglophone-des-separatistes-ayant-decapites-un-enseignant-arretes/>

1. **Cameroun – Crise anglophone: Une adolescente assassinée par les séparatistes**

[**Franck Daniel Batassi.237online.com**](https://www.237online.com/author/franck-daniel-batassi/)5 août 2020

 Moins d’une minute

[Pinterest](https://pinterest.com/pin/create/button/?url=https://www.237online.com/cameroun-crise-anglophone-une-adolescente-assassinee-par-les-separatistes/&description=Cameroun%20%E2%80%93%20Crise%20anglophone%3A%20Une%20adolescente%20assassin%C3%A9e%20par%20les%20s%C3%A9paratistes&media=https://www.237online.com/wp-content/uploads/2020/08/Jeune-fille-assassine.jpg) [Reddit](https://reddit.com/submit?url=https://www.237online.com/cameroun-crise-anglophone-une-adolescente-assassinee-par-les-separatistes/&title=Cameroun%20%E2%80%93%20Crise%20anglophone%3A%20Une%20adolescente%20assassin%C3%A9e%20par%20les%20s%C3%A9paratistes)

Le corps sans vie de la victime a été découvert le mardi 4 août 2020, sous le port du département de la Mezam.

Une découverte macabre mardi dernier dans la région du Nord-Ouest, et plus précisément sous le pont de la Mezam. Il s’agit du corps sans vie d’une adolescente qui se prénommait Trésor et qui menait une activité génératrice de revenus au marché centrale de Bamenda.

Dans une vidéo virale qui circule actuellement sur les réseaux sociaux, il est déplorable de constater que son cou est complètement tranché.

<https://www.237online.com/cameroun-crise-anglophone-une-adolescente-assassinee-par-les-separatistes/>

1. **Cameroun-Crise anglophone : 60 otages libérés à Alou**

[**Franck Daniel Batassi.237online.com**](https://www.237online.com/author/franck-daniel-batassi/)21 juillet 2020

 Moins d’une minute

[Pinterest](https://pinterest.com/pin/create/button/?url=https://www.237online.com/cameroun-crise-anglophone-60-otages-liberes-a-alou/&description=Cameroun-Crise%20anglophone%20%3A%2060%20otages%20lib%C3%A9r%C3%A9s%20%C3%A0%20Alou&media=https://www.237online.com/wp-content/uploads/2018/10/otages-libere.jpg) [Reddit](https://reddit.com/submit?url=https://www.237online.com/cameroun-crise-anglophone-60-otages-liberes-a-alou/&title=Cameroun-Crise%20anglophone%20%3A%2060%20otages%20lib%C3%A9r%C3%A9s%20%C3%A0%20Alou)

Suite à des affrontements entre séparatistes et forces de défense, dans cette commune de la région du Sud-Ouest, les victimes ont été délivrées, nous apprend Canal 2 International au cours de son journal télévisé de 20 h ce lundi.

Coup de force réussie par l’armée camerounaise à Alou, dans le département du Lebialem (Sud-Ouest). Alors que les kidnappings des 60 personnes n’avaient été revendiqués par aucune secte terroriste, les forces de défense et de sécurité ont mené des investigations. Des initiatives qui s’avèrent payantes. Moins de 24 heures après les enlèvements, 25 otages ont été délivrés au cours des affrontements entre l’armée régulière et les séparatistes. Les 35 autres ont pu respirer l’air de la liberté quelques heures plus tard.

<https://www.237online.com/cameroun-crise-anglophone-60-otages-liberes-a-alou/>

1. **Cameroun – Crise anglophone : Une dizaine de nouveaux otages au Sud-Ouest**

[**Franck Daniel Batassi.237online.com**](https://www.237online.com/author/franck-daniel-batassi/)16 juillet 2020

 Moins d’une minute

Les séparatistes ont kidnappé plus de dix personnes, dans la région du Sud-Ouest, le mardi 14 juillet 2020.

Nouveaux kidnapping au Sud-Ouest du pays. Une dizaine de personnes ont été enlevées dans le département du Lebialem, plus précisément dans la localité de Alo. Les civils ont été pris en otage lorsqu’ils se trouvaient dans une buvette d’alcool traditionnel.

De source digne de foi, les ravisseurs qui sont des Hommes armés exigent la somme de 1,5 millions de Francs CFA pour la libération des otages.

Ce nouvel enlèvement porte le nombre d’otages à 63, à ce jour, dans le département du Lebialem, réputé zone de déferlement des groupes séparatistes.

<https://www.237online.com/cameroun-crise-anglophone-une-dizaine-de-nouveaux-otages-au-sud-ouest/>

1. **Crise anglophone : la CDC fait son come-back après 19 mois d’inactivité**

 Alain Basile DJOMO.237online.com12 juillet 2020

 Temps de lecture 1 minute

[Pinterest](https://pinterest.com/pin/create/button/?url=https://www.237online.com/crise-anglophone-la-cdc-fait-son-come-back-apres-19-mois-dinactivite/&description=Crise%20anglophone%20%3A%20la%20CDC%20fait%20son%20come-back%20apr%C3%A8s%2019%20mois%20d%E2%80%99inactivit%C3%A9&media=https://www.237online.com/wp-content/uploads/2018/10/cdc-cameroun.jpg)

En dépit du climat d’insécurité qui règne dans les deux Régions anglophones du Cameroun où sont concentrés l’essentiel de ses activités, elle a pu exporter 301 tonnes de bananes en juin 2020.

Selon les données de l’Association bananière du Cameroun (ASSIBACAM), La Cameroon Development Corporation (CDC), 2e employeur du pays après l’administration publique, a exporté 301 tonnes de bananes au cours du mois de juin 2020. Toute chose qui marque sa réapparition sur le fichier des exportateurs après dix-neuf mois d’absence. Il est bon de savoir que la CDC est le deuxième employeur camerounais après l’Etat. Mais du fait de l’insécurité créée par les séparatistes anglophones dans les Régions du Nord-Ouest et de Sud-Ouest du Cameroun, les activités de cette importante unité agro-industrielle public étaient en berne depuis plus d’un an.

Aujourd’hui c’est à la grande satisfaction du top management et des employés, ainsi que de l’Etat du Cameroun, que la Cameroon Development Corporation fait son come-back dans la liste des exportateurs. Pour ce retour, la CDC se positionne comme numéro 2 du marché de la banane, derrière la société des Plantations du Haut Penja (PHP), et devant Boh Plantations Plc.

La relance des activités à la CDC était attendue depuis le 3e trimestre 2019. À en croire des sources internes à l’Assobacam, suite à de nombreuses concertations au sein du gouvernement, sur la situation de la CDC, une reprise des activités était déjà projetée à cette période-là, sur une superficie de 1000 hectares. Mais, pour ce faire, les dirigeants de la CDC avaient préalablement exprimé à l’État, l’actionnaire unique de l’entreprise, un besoin de 29 milliards de FCFA pour se relever des ravages de la crise dans les régions anglophones du Cameroun. Cette enveloppe des besoins est probablement plus importante de nos jours.

<https://www.237online.com/crise-anglophone-la-cdc-fait-son-come-back-apres-19-mois-dinactivite/>

1. **Cameroun – Crise anglophone : l’Armée reprend la route Oku – Kumbo aux sécessionnistes**

[**Tonton Ntsama.237online.com**](https://www.237online.com/author/ntsama/)6 juillet 2020

 Temps de lecture 1 minute

L’Armée camerounaise a repris le contrôle de la route Oku – Kumbo ( région du Nord-Ouest Cameroun), aux combattants séparatistes anglophones, après deux ans de blocus par ces derniers.

La route Oku- Kumbo est à nouveau réouverte à la circulation. Cela n’avait plus été le cas depuis deux ans. Cette voie de communication, était bloquée par les miliciens séparatistes anglophones, lesquels y avaient fait des tranchées de part et d’autre.

Selon des informations émanant des sources sécuritaires, 500 militaires qu’appuyaient 40 véhicules de combat, ont investi la susdite localité ce week-end, mettant fin à la barbarie des miliciens séparatistes. Concrètement, l’on apprend qu’une dizaine de combattants séparatistes a trouvé la mort, des camps d’entraînement détruits.

La route Oku- Kumbo est désormais libérée par l’Armée camerounaise.

<https://www.237online.com/cameroun-crise-anglophone-larmee-reprend-la-route-oku-kumbo-aux-secessionnistes/>

1. **Crise anglophone au Cameroun : La vidéo d’un pasteur kidnappé et torturé sur la toile**

[**Franck Daniel Batassi.237online.com**](https://www.237online.com/author/franck-daniel-batassi/)5 juin 2020

 Temps de lecture 1 minute

[Pinterest](https://pinterest.com/pin/create/button/?url=https://www.237online.com/crise-anglophone-au-cameroun-la-video-dun-pasteur-kidnappe-et-torture-sur-la-toile/&description=Crise%20anglophone%20au%20Cameroun%20%3A%20La%20vid%C3%A9o%20d%E2%80%99un%20pasteur%20kidnapp%C3%A9%20et%20tortur%C3%A9%20sur%20la%20toile&media=https://www.237online.com/wp-content/uploads/2019/05/milice-anglophone-separatiste.jpg) [Reddit](https://reddit.com/submit?url=https://www.237online.com/crise-anglophone-au-cameroun-la-video-dun-pasteur-kidnappe-et-torture-sur-la-toile/&title=Crise%20anglophone%20au%20Cameroun%20%3A%20La%20vid%C3%A9o%20d%E2%80%99un%20pasteur%20kidnapp%C3%A9%20et%20tortur%C3%A9%20sur%20la%20toile)

Depuis le mercredi 03 juin 2020, la vidéo d’un pasteur, qui a été enlevé et se fait torturer par des sécessionnistes, fait le tour des réseaux sociaux.

Les images ont été tournées à Batibo (département de la Momo, région du Nord-Ouest). Elles montent un homme ligoté, qui est torse nu et vêtu d’un pantalon noir. En regardant minutieusement la vidéo qui dure un peu plus de trois minutes, on peut s’apercevoir que la victime est le pasteur Theopilus de l’Eglise Presbytérienne de Batibo. Cette vidéo révèle des échanges houleux en langues anglaise et pidgin.

Les bourreaux reprochent au chrétien sa participation au grand dialogue national. L’homme de Dieu implore ses kidnappeurs qui lui réclament ce qu’il a ramené du dialogue national. Ils lui reprochent également d’être prêt des militaires qui auraient trouvé refuge dans la maison de Dieu. Dans la même vidéo, les ravisseurs armés font savoir qu’ils entendent tout de même libérer l’otage à une seule condition : bénéficier d’une rançon de 2,5 millions Francs.

De mémoire, depuis le début de la crise dans les régions du Nord-Ouest et du Sud-Ouest, les hommes de Dieu sont régulièrement les cibles des sécessionnistes. Ces rebelles reprochent aux pasteurs d’être des indics des forces de maintien de l’ordre. L’une des autres victimes des hors-la-loi est le pasteur Paddy Agbor, kidnappé le 10 juillet à Mile 16, au Sud-Ouest. Ce dernier avait été enlevé pendant une visite à Legendary Hospital. On est sans nouvelles de lui jusqu’à ce jour.

<https://www.237online.com/crise-anglophone-au-cameroun-la-video-dun-pasteur-kidnappe-et-torture-sur-la-toile/>

1. **Fête nationale de l’Etat unitaire : ou le point d’achoppement de la crise anglophone**

[**Alain Basile DJOMO.237online.com**](https://www.237online.com/author/alain-basile-djomo/)19 mai 2020

 2 minutes de lecture

[Pinterest](https://pinterest.com/pin/create/button/?url=https://www.237online.com/fete-nationale-de-letat-unitaire-ou-le-point-dachoppement-de-la-crise-anglophone/&description=F%C3%AAte%20nationale%20de%20l%E2%80%99Etat%20unitaire%20%3A%20ou%20le%20point%20d%E2%80%99achoppement%20de%20la%20crise%20anglophone&media=https://www.237online.com/wp-content/uploads/2019/05/defile-20-mai-2019-5.jpg) [Reddit](https://reddit.com/submit?url=https://www.237online.com/fete-nationale-de-letat-unitaire-ou-le-point-dachoppement-de-la-crise-anglophone/&title=F%C3%AAte%20nationale%20de%20l%E2%80%99Etat%20unitaire%20%3A%20ou%20le%20point%20d%E2%80%99achoppement%20de%20la%20crise%20anglophone)

Une frange des anglophones estime effectivement que le référendum du 20 Mai 1972 qui transforme l’Etat fédéral en une République Unie était en violation des close de la Conférence de Foumban.

Au moment où les camerounais, faute d’une célébration en bonne et due forme (Covid19 oblige), se prépare à la commémoration de la 48ème fête de l’unité national, il s’avère important de marquer un temps d’arrêt sur cette date, en l’occurrence le 20 Mai 1972. Car beaucoup de compatriotes ignorent que cette date est à l’origine du problème anglophone, qui aujourd’hui a pris les dimensions d’un conflit armé opposant les forces républicaines aux groupes armés sécessionnistes.

Pour mémoire, en 1945, l’ensemble des territoires camerounais jusque-là sous mandat de la Société des Nation, passent sous tutelle de l’Organisation des Nations unies (ONU). Le Cameroun oriental obtient son autonomie interne en 1958, dans le cadre de la Communauté française, puis accède à l’indépendance en 1960. Le Cameroun occidental se scinde en deux après un référendum d’autodétermination organisé en 1961. Les populations du Nord, musulmanes, choisissent de rester nigérianes tandis que les habitants du Sud, chrétiens ou animistes, demandent leur rattachement au Cameroun. La même année et après la fameuse Conférence de Foumban dont l’objectif était de définir les règles de jeu devant régir le vivre ensemble des deux Etats, est formée une république fédérale du Cameroun, sous la présidence d’Ahmadou Ahidjo, Premier ministre depuis 1958. En 1972, Ahidjo organise un référendum qui transforme l’État fédéral en République unie du Cameroun.

Deux mots clef de ce qui précède sont intéressant pour la compréhension du problème anglophone. Tout d’abord le ‘’referendum d’autodétermination’’ de 1961. Comme quoi la partie anglophone du Sud avait la latitude, la possibilité de choisir de se rattacher au Nigéria comme l’on fait ceux du Nord. Don contrairement à ce que d’aucun pense, il ne s’agissait pas d’une restitution par l’ONU d’une partie du territoire camerounais, mais d’un choix délibéré des anglophones de s’unir au Cameroun oriental. L’autre terme essentiel de ce problème est la ‘’la Conférence de Foumban’’. Au cours de celle-ci, un certain nombre de closes avaient été prise et ne devaient jamais être modifiées.

C’est ainsi qu’il avait été écrit que la forme fédérale de l’Etat (exigée par les anglophone) ne devait jamais être modifié. Mais en 1972 le Président Ahidjo viole cette close en décrétant la République Unie du Cameroun sous le prétexte fallacieux d’un référendum, dont les témoins disent qu’il n’y avait que deux bulletins dans les bureaux de vote : le ‘’Oui’’ et le ‘’Yes’’. Cette mascarade ajoutée aux autres frustration va faire naitre la crise anglophone, aujourd’hui récupérée par les Ambazoniens.

<https://www.237online.com/fete-nationale-de-letat-unitaire-ou-le-point-dachoppement-de-la-crise-anglophone/>

1. **Cameroun – Crise anglophone : Le nouveau maire de Mamfe assassiné**

[**Tonton Ntsama.237online.com**](https://www.237online.com/author/ntsama/)10 mai 2020

 Temps de lecture 1 minute

[Pinterest](https://pinterest.com/pin/create/button/?url=https://www.237online.com/cameroun-crise-anglophone-le-nouveau-maire-de-mamfe-assassine/&description=Cameroun%20%E2%80%93%20Crise%20anglophone%20%3A%20Le%20nouveau%20maire%20de%20Mamfe%20assassin%C3%A9&media=https://www.237online.com/wp-content/uploads/2020/05/Ashu-Prinsley-Ojong.jpg) [Reddit](https://reddit.com/submit?url=https://www.237online.com/cameroun-crise-anglophone-le-nouveau-maire-de-mamfe-assassine/&title=Cameroun%20%E2%80%93%20Crise%20anglophone%20%3A%20Le%20nouveau%20maire%20de%20Mamfe%20assassin%C3%A9)

Il s’appelait Ashu Prinsley Ojong. Il avait 35 ans seulement. C’était le nouveau maire de Mamfe, département de la Manyu dans la région du Sud-Ouest.

Il a été assassiné ce matin du dimanche, 10 mai 2020. Selon nos informations, appelé au téléphone par de présumés séparatistes qui l’invitaient à se rendre à Eshobi son village afin de les voir déposer les armes, le maire est plutôt tombé dans un guet apens. Il a été froidement abattu par les séparatistes, peu avant le pont de son village construit par la multinationale française Satom.

Il y a une semaine, le chauffeur de Ashu Prinsley Ojong, a été assassiné dans le même village, par des combattantes séparatistes. 237online.com a aussi appris que deux militaires de l’escorte du maire ont été grièvement blessés, et seraient morts à l’hôpital militaire de Douala dans la région du Littoral camerounais.

Dommage pour ce jeune maire tombé dans le piège de cruels combattants sécessionnistes anglophones qui l’ont appelé au téléphone, pour lui demander de venir les accueillir dans son village à Eshobi, simulant une cessation des combats, et lui disant avoir déposé les armes.

<https://www.237online.com/cameroun-crise-anglophone-le-nouveau-maire-de-mamfe-assassine/>

1. **Cameroun – Crise anglophone: L’armée crache du feu à Ndop**

[**237online**](https://www.237online.com/author/237online/)1 avril 2020

 2 minutes de lecture

[Pinterest](https://pinterest.com/pin/create/button/?url=https://www.237online.com/cameroun-crise-anglophone-larmee-crache-du-feu-a-ndop/&description=Cameroun%20%E2%80%93%20Crise%20anglophone%3A%20L%E2%80%99arm%C3%A9e%20crache%20du%20feu%20%C3%A0%20Ndop&media=https://www.237online.com/wp-content/uploads/2020/04/camp-ambazonien-demantele.jpg) [Reddit](https://reddit.com/submit?url=https://www.237online.com/cameroun-crise-anglophone-larmee-crache-du-feu-a-ndop/&title=Cameroun%20%E2%80%93%20Crise%20anglophone%3A%20L%E2%80%99arm%C3%A9e%20crache%20du%20feu%20%C3%A0%20Ndop)

Les forces de défense viennent de neutraliser plusieurs combattants séparatistes, et détruit leur camp dans le Nord-Ouest.

L’armée camerounaise a engagé il y a 2 semaines une opération militaire d’envergure dans un camp de séparatistes dans l’arrondissement de Ndop, département du Ngo-Lituba (région du Nord-Ouest). Le camp en question est situé sur les bords du lac Babalang, à quelques kilomètres des départements du Noun et des Bamboutos dans la région de l’Ouest. Des sources militaires indiquent «*plusieurs terroristes neutralisés*» sans en préciser le nombre. L’armées a également découvert des armes et des munitions au cours de cette opération. « *Cela a été une action très réussie, nous avons attaqué un camp des séparatistes et l’avons détruit »*, témoigne une source sécuritaire. Cette opération musclée de l’armée camerounaise rentre, renseigne-t-on, dans le cadre de l’opération de « *ratissage de la zone* » après l’attaque armée de la localité de Galim. En effet, la ville de Galim, dans le département des Bamboutos, région de l’Ouest, a été attaquée dans la nuit du 07 Mars 2020. Des assaillants lourdement armés sont entrés dans la ville, et ont attaqué la brigade territoriale de gendarmerie et le poste de sécurité publique. Sur le carreau, quatre éléments des forces de sécurité sont tombés, selon le gouvernement.

**Offensive éclair**

On s’attendait à une bataille acharnée pour la prise du camp du lac Babalang à Ndop. En fait, il n’a fallu que quelques heures aux hommes de Joseph Beti Assomo, l’armée républicaine, pour marcher sur la zone. Une offensive éclair. Un blitzkrieg sous les tropiques. Les combattants séparatistes ont été pulvérisés. Tout a commencé le 14 mars lorsque l’armée reçoit un renseignement d’une source civile de l’existence d’une base importante des combattants sécessionnistes dans l’arrondissement de Ndop. Une opération militaire est donc planifiée et le 18 mars, c’était l’assaut. Les militaires camerounais ont déployé une bonne artillerie de guerre, et un déluge de feu est tombé sur le camp des séparatistes. *« Pour nous, la destruction de ce camp a été décisive »*, confie un officier de haut rang de l’armée camerounaise. «*Le zone pullulait de criminels séparatistes. Il fallait absolument qu’on les neutralise »*, ajoute l’officier supérieur qui a préféré gardé l’anonymat.

Signalons que plusieurs camps des groupes séparatistes armés ont été détruits depuis que les forces de défense ont déclenché leur offensive contre les combattants sécessionnistes dans les régions du Nord-Ouest et du Sud-Ouest. Les indépendantistes de la République « imaginaire » d’Ambazonie qui affirment se battre pour la libération de « leur » territoire, se sont taillé une notoriété avec leurs multiples exactions sur les éléments des forces de défense et de sécurité et les civils, sans oublier les prises d’otages. Les militaires camerounais se disent portés par le message du président Paul Biya. *« Si l’appel à déposer les armes que j’ai lancé aux entrepreneurs de guerre reste sans réponse, les forces de défense et de sécurité recevront instruction de les neutraliser »,* avait-il affirmé dans un de ses discours de fin d’année.

<https://www.237online.com/cameroun-crise-anglophone-larmee-crache-du-feu-a-ndop/>

1. **Cameroun: Les confessions d’une déplacée de la crise anglophone**

[**237online**](https://www.237online.com/author/237online/)19 mars 2020

 3 minutes de lecture

[Pinterest](https://pinterest.com/pin/create/button/?url=https://www.237online.com/cameroun-les-confessions-dune-deplacee-de-la-crise-anglophone/&description=Cameroun%3A%20Les%20confessions%20d%E2%80%99une%20d%C3%A9plac%C3%A9e%20de%20la%20crise%20anglophone&media=https://www.237online.com/wp-content/uploads/2020/03/vendeuse-de-beignets.jpg) [Reddit](https://reddit.com/submit?url=https://www.237online.com/cameroun-les-confessions-dune-deplacee-de-la-crise-anglophone/&title=Cameroun%3A%20Les%20confessions%20d%E2%80%99une%20d%C3%A9plac%C3%A9e%20de%20la%20crise%20anglophone)

Pauline Mafor, âgée de 44 ans, mère de six enfants est une déplacée de la crise anglophone qui s’est installée à Yaoundé et qui vend chaque matin les beignets haricots et bouillies.

La saveur des beignets, haricots, bouillies stimule les papilles gustatives de nombreux jeunes du quartier Ebom à Yaoundé. Maman Pauline, est une déplacée de la crise anglophone qui s’est installée à Yaoundé et qui vend chaque matin les beignets haricots et bouillies. Cet article rend un
vibrant hommage pour le courage et l’abnégation dont elle ne s’est jamais départie depuis déjà trois ans. Elle est une quadragénaire, corpulence moyenne, sur une charpente corporelle de 171cm de hauteur, pour 85 kg. La démarche sûre et lente, elle est à chaque fois couverte d’éloges par ses clients. Madame Pauline Mafor de son nom à l’état civil, est originaire de Kumbo dans la région du Nord-Ouest du Cameroun. Depuis bientôt trois ans, elle a prêté serment auprès de sa propre conscience de donner le meilleur d’elle-même pour que chaque matin, les beignets, haricots et bouillie soient prêts pour le plaisir des habitants de l’arrondissement de Yaoundé III. « Je suis Pauline Mafor, j’ai 44 ans et j’ai six enfants, trois filles et trois garçons. Je suis une déplacée de la crise anglophone. Je me suis installée ici avec ma famille au début de la crise en 2016. J’ai eu beaucoup de chance parce que j’ai ma fille ainée ici à Yaoundé. Elle m’a aidé à m’installer ici.

Quand je me suis installée avec ma famille, le plus dur commence. Il me fallait trouver quelque chose à faire, c’est pourquoi j’ai embrassé ce métier que je faisais déjà à Kumbo. Grâce à la vente des beignets, haricots et bouillies, je prends en charge ma famille et moi », confie-elle, derrière une cuvette d’huile de beignets au feu. Et de poursuivre, « je nourris les parents, les enfants et tous les jeunes du quartier des beignets, haricots et bouillie. D’abord, je dirais que comme ma maman, j’ai été toujours une femme serviable, respectueuse et travailleuse. Je passais mon adolescence toujours auprès d’elle. Elle me disait toujours qu’une vraie femme ne devrait pas avoir le sommeil si sa famille n’a pas mangé. Quel que soit la situation, elle a l’obligation de se battre. C’est à ce moment que j’ai compris que la femme africaine a pour mission de nourrir son entourage et sa communauté. Les beignets, haricots et bouillie ont été dans ma jeunesse mon plat favori. Depuis que je suis ici, j’active quotidiennement le feu de bois pour cela », avoue-t-elle.

**A la merci des risques**

Comme tout métier, Mâ Pô, comme l’appelle affectueusement ses clients, regrette que les prix des beignets ; haricots ; bouillies ont doublé. Toujours est-il que, avant, un beignet coûtait 10 Fcfa. Aujourd’hui, c’est passé à 25 Fcfa. La cuillère de haricot est passée de 10 Fcfa à 25 Fcfa et la tasse de bouillie de 25 Fcfa à 50 Fcfa. Malgré l’amour pour ce métier, la quadragénaire est nostalgique des prix d’antan. Quand elle jette un coup d’œil dans le rétroviseur, elle remarque que les prix de la farine ont septuplé. «*En ce qui me concerne, par exemple, le sac de farine aujourd’hui coûte 25 000 Fcfa. Quand j’étais petite, il coûtait 5 000 francs. Je suis nostalgique de cette période radieuse. C’est tellement difficile aujourd’hui que je suis obligée de pétrir seulement les 1/10ème de la pâte de farine que je pétrissais avant. C’est compliqué. Le litre d’huile rouge est sur le marché maintenant à 800 Fcfa le litre. Le sceau de haricot est passé de 6000 francs à 10 000 Fcfa. Je suis donc obligée d’élargir mon commerce en préparant aussi du riz, des spaghettis, des frites de plantains et de poissons ».*

Pour exercer ce métier, il faut avoir tout le tempérament et la lucidité nécessaires pour gérer les humeurs des clients. Trouver les astuces pour que les clients malhonnêtes ne disparaissent pas avec votre argent. Les rentrées tardives à la maison, puisque parfois, j’arrête à 15 heures à la maison avant de chercher à cuisiner pour ma famille. Enfin, le plus difficile est la santé. En fait, il ne se passe pas un an sans que je ne sois interné dans un hôpital. Le contact permanent avec le feu est à l’origine de ces malaises. Les risques sont énormes. Mais comme je l’ai dit, j’ai l’amour de mon métier : nourrir la population me procure un plaisir immense.

<https://www.237online.com/cameroun-les-confessions-dune-deplacee-de-la-crise-anglophone/>

1. **Cameroun – Crise anglophone: Washington embarrasse Yaoundé**

[**237online**](https://www.237online.com/author/237online/)16 mars 2020

 2 minutes de lecture

Les discussions entre Paul Biya et l’ambassadeur des Etats-Unis au Cameroun, Peter Henry Balerin, le 11 mars, confortent le souhait des Etats-Unis d’être au cœur de la médiation dans la crise anglophone.

C’est le fait majeur de l’actualité cette semaine, après la sortie très controversée du ministre de l’Administration territoriale, Paul Atanga Nji. Le président de la République, Paul Biya, a reçu en audience au palais de l’Unité, mercredi 11 mars, l’ambassadeur des Etats-Unis au Cameroun, Peter Henry Balerin. La rencontre, qui semblait très balisée, joue pourtant un rôle bien précis et important : réchauffer les relations entre Yaoundé et Washington. Sur son compte officiel Tweeter, le président de la République écrit : « *L’ambassadeur des USA au Cameroun, S.E Peter Balerin et moi, avons discuté des sujets d’intérêt commun, notamment la santé et la situation dans le Nord-Ouest et le Sud-Ouest*». La santé dont le chef de la mission diplomatique américaine au Cameroun félicite les mesures prises par le Cameroun pour faire face à la pandémie du VIH/Sida et la pour lutter contre l’épidémie de Coronavirus. « *Nous sommes confiants qu’avec beaucoup de travail, nous pouvons circonscrire le VIH/Sida au Cameroun d’ici fin2021 »*, a indiqué Peter Henry Balerin. Il a d’ailleurs souhaité que Paul Biya visite le Centre des opérations d’urgence en santé publique au Cameroun, mis en place avec le soutien des Etats-Unis pour lequel le gouvernement américain vient de débloquer la somme de 120 000 dollars, soit environ 71 millions de F.

**Pressions**

Ce n’est plus un secret. Les Etats-Unis suivent de près la situation dans les régions du Nord-Ouest et du Sud-Ouest. Certains secteurs de l’administration Trump, pour qui le Cameroun est important en raison de l’existence d’une forte communauté anglophone, veulent jouer leur partition pour résoudre le conflit. Et Peter Henry Balerin n’a pas manqué de le relever mercredi au perron du palais de l’Unité. *« Comme l’a dit le sous-secrétaire aux Affaires africaines au département d’Etat, le conflit ne sera résolu que par le dialogue et la réconciliation*», a relevé le diplomate américain. Une posture constante de l’administration Trump qui, à en croire plusieurs sources au sein de l’exécutif camerounais, veut être au centre des négociations. «*Au Cameroun, nous proposons une solution qui va dans le sens du dialogue entre le gouvernement et les anglophones, donc de la désescalade et de la mise en place d’une indispensable décentralisation. Chaque fois que le gouvernement tente de réprimer la communauté anglophone ou de marginaliser ses intérêts, les tendances sécessionnistes se renforcent*», avait déclaré Robert Malley, ex-conseiller Proche-Orient, Moyen-Orient et Afrique du Nord des présidents Bill Clinton et Barack Obama.

Notons que dans le Noso, la terreur n’a pas baissé d’un cran.Les violences se poursuivent, les armes crépitent et les lames tranchent. Ngarhuh dans région du Nord-Ouest, plus d’une vingtaine de personnes sont mortes dont plusieurs enfants et des femmes enceintes. Les Etats-Unis, tout comme l’Onu, ont exigé des autorités camerounaises une enquête «*indépendante, impartiale et complète* ». Une situation qui embarrasse Paul Biya, alors que son gouvernement parle d’un « *malheureux accident*». « *Une des raisons pour lesquelles M. Biya pourrait confier la médiation aux américains est une tentative de renforcer son image au niveau international et par conséquent de consolider sa position auprès des grands pays*», commente, sous couvert de l’anonymat, un cadre du ministère des Relations extérieures.

<https://www.237online.com/cameroun-crise-anglophone-washington-embarrasse-yaounde/>

1. **Cameroun/Crise anglophone : Couvre-feu total dans la Mezam**

 Franck Daniel Batassi.237online.com11 mars 2020

 Temps de lecture 1 minute

Les heures de voyage entre Bamenda et Bafoussam ont été restreintes dans ce département.

Simon Emilie Mooh, le préfet de la Mezam a pris la décision d’instaurer un couvre-feu dans son département. L’annonce a été faite ce lundi 09 mars à travers la Cameroun Radio Television (CRTV) antenne de la ville de Bamenda, chef-lieu de la région du Nord-Ouest.

Les voyageurs de Bamenda pour Bafoussam sont invités à se regrouper au lieudit « Custom Junction » dès 09 h pour les voyageurs du matin, et 10 h pour ceux du soir.

Quant à ceux partant de Bafoussam pour Bamenda, le rassemblement se tiendra au lieudit « Malazem ». Les personnes qui voyagent le matin s’y rassembleront à 06 h, tandis que ceux du soir s’y rassembleront lorsqu’il sera 17 h.

Désormais, les véhicules de transport inter urbain seront automatiquement escortés par les forces de sécurité.

De mémoire, ce n’est pas la première fois qu’un préfet instaure un couvre-feu dans ce département. Simon Pierre, l’ancien préfet avait instauré une interdiction du genre aux populations en 2017. Sauf que là, il était formellement interdit de se déplacer entre 22 h et 5 h. Ce couvre-feu intervenait au lendemain d’une attaque contre les contre des forces de l’ordre Check-point de Bafut.

<https://www.237online.com/cameroun-crise-anglophone-couvre-feu-total-dans-la-mezam/>

1. **Crise anglophone: Paul BIYA gagne la bataille diplomatique**

[**237online**](https://www.237online.com/author/237online/)5 mars 2020

 Temps de lecture 1 minute

Trois des cinq membres du conseil de Sécurité notamment, la Chine, la Russie et les USA, n’épousent plus la cause des séparatistes qui ont transformé une lutte qui aurait dû être pacifique en des pratiques terroristes.

Cette dernière occasionnant la mort de plusieurs milliers de civils camerounais.

Après 3 ans, la Russie, la Chine et les USA sont pour l’indivisibilité du Cameroun. La Russie dit être contre toute ingérence dans ce conflit qui est du ressort des Camerounais eux même.

USA de leurs côtés comptent accompagner le pays de Paul Biya pour une meilleure implémentation de la décentralisation. Position qui est similaire à celle de la Chine.

Sur le terrain malgré une campagne de diabolisation du pays. La situation s’est d’avantage amélioré. Le Sud-Ouest est pratiquement sorti du spectre de la violence. Le Nord-Ouest l’est aussi malgré quelques poches de résistance ça et là . Il est aussi en voie de pacification.

Les camerounais doivent arrêter cette campagne de diabolisation que certains font contre leur pays pour des raisons purement partisanes.
Le tribalisme, le repli identitaire, l’apologie de la haine ne peuvent en rien aider ce grand pays ! Mais l’amour d’antan, la passion de ce que cette grande mosaïque culturelle était.

<https://www.237online.com/crise-anglophone-paul-biya-gagne-la-bataille-diplomatique/>

1. **Crise anglophone : l’épiscopat de l’église Catholique Romain monte au créneau**

[**Alain Basile DJOMO.237online.com**](https://www.237online.com/author/alain-basile-djomo/)21 février 2020

 2 minutes de lecture

Elle demande au Gouvernement de se joindre à la mission de médiation Suisse, en vue de trouver une solution de paix durable dans le NOSO.

C’est en effet sous l’égide du Pape que les évêques du monde entier, manifestement attristés et préoccupés par les derniers évènements ayant secoué les deux Régions anglophone du Cameroun ces derniers jours, ont saisi le Chef de l’Etat camerounais à travers une correspondance datant du 17 février 2020, dans laquelle ils demandent au gouvernement camerounais de saisir la main tendue de la mission de médiation Suisse, en vue de trouver une solution de paix durable dans le NOSO.

La note ecclésiastique soussignée par plus d’une dizaine de têtes couronnées de l’église Catholique Romaine (évêques archevêques et cardinaux), le tout ratifiée par Pape François en personne, précise dès l’entame le principe d’impartialité de leur requête. La seule motivation qui sous-tendrait l’initiative de l’épiscopat catholique, si l’on s’en tient à cette note, est la souffrance des populations civils, la stabilité et la prospérité du Cameroun. C’est pourquoi dans cette lettre, ils ont tenu à rappeler que les atrocités de la crise anglophone ont provoqué plus 656 000 déplacés de guerre anglophone ; plus de 800 000 enfants déscolarisés ; au moins 50 000 réfugiés au Nigéria ; 500 villages détruits ; et plus de 2000 mort…

Le clergé catholique croit dure comme fer qu’Il n’y aura pas de victoire militaire dans un camp comme dans l’autre. Pour eux, la solution au problème anglophone n’aura d’issue favorable que dans un processus de médiation incluant les groupes armés séparatiste et les leaders de la société civil camerounaise. Si dans ce processus de dialogue les différentes parties se respectent mutuellement, il est certain qu’une solution pourra en sortir
Les évêques, les archevêques, et cardinaux, tout en félicitant les efforts consentis par le Gouvernement camerounais, notamment le Grand Dialogue National, déplore le fait qu’il n’a pas stopper la violence. C’est pour cette raison que les hommes de Dieu en disant que : « *nous pensons que la proposition de la médiation Suisse est à même d’apporter une solution à la crise anglophone… Nous espérons que toutes les parties intéressées se joindront à ce rendez-vous du dialogue et feront preuve de coopération de pragmatisme et de réalisme pour assurer un succès à cette négociation*».

<https://www.237online.com/crise-anglophone-lepiscopat-de-leglise-catholique-romain-monte-au-creneau/>

1. **Diplomatie : Pour l’ONU, la crise anglophone au Cameroun est terminé**

[**Alain Basile DJOMO.237online.com**](https://www.237online.com/author/alain-basile-djomo/)11 février 2020

 Temps de lecture 1 minute

[Pinterest](https://pinterest.com/pin/create/button/?url=https://www.237online.com/diplomatie-pour-lonu-la-crise-anglophone-au-cameroun-est-termine/&description=Diplomatie%20%3A%20Pour%20l%E2%80%99ONU%2C%20la%20crise%20anglophone%20au%20Cameroun%20est%20termin%C3%A9&media=https://www.237online.com/wp-content/uploads/2018/12/bir-crise-anglophone.jpg) [Reddit](https://reddit.com/submit?url=https://www.237online.com/diplomatie-pour-lonu-la-crise-anglophone-au-cameroun-est-termine/&title=Diplomatie%20%3A%20Pour%20l%E2%80%99ONU%2C%20la%20crise%20anglophone%20au%20Cameroun%20est%20termin%C3%A9)

Selon le représentant du SG de cette institution, le Cameroun contrôle la situation.

Les lampions se sont éteints ce 10 février sur le 33ème sommet de l’Union Africaine à Addis Abeba. Il a connu la participation de plusieurs Chefs d’Etat, de gouvernement, de ministres et de diplomates.

Aux sorties de ce grand rendez-vous continental plusieurs sujets d’actualités africaines majeures étaient au menu. Interrogé, sur la crise anglophone qui secoue le Cameroun, mais qui n’était pas à l’ordre du jour de ce 32ème sommet, Le représentant du Secrétaire Général de l’Organisation des Nations-Unies, l’invité de l’Union Africaine ne s’est pas fait prier pour donner le point de vu de l’institution qui l’emploie.

« *Le Cameroun dit-il, a notre soutien, c’est un État qui jusqu’à nos jours gère sa crise interne avec beaucoup d’administration. Voilà pourquoi la crise anglophone n’a pas trouvé d’agenda à l’Union Africaine. Nous avons envoyé nos représentants au Cameroun et l’Union Africaine l’a fait aussi et les rapports semblent de moins en moins inquiétantes aujourd’hui qu’avant. Je vous remercie*».

En d’autres termes, le diplomate signifiait aux médias que la situation au Cameroun contrairement à ce qui se fait entendre çà et là, n’est pas aussi alarmant, au regard des graves calamités et des guerres sanglantes dont l’Afrique est en proie. En plus le Cameroun est en train de trouver progressivement des solutions à cette crise. Comme quoi ceux qui caressent le rêve démentiel d’une intervention des puissances étrangères, doivent revenir à la raison.

<https://www.237online.com/diplomatie-pour-lonu-la-crise-anglophone-au-cameroun-est-termine/>

1. **[Les séparatistes ambazoniens accusent Maurice Kamto d’utiliser la crise anglophone pour arriver pouvoir](https://www.237online.com/cameroun-le-senat-salue-le-bon-deroulement-des-elections-regionales/" \t "_self)**

[**[Alain Basile DJOMO.237online.com](https://www.237online.com/cameroun-le-senat-salue-le-bon-deroulement-des-elections-regionales/" \t "_self)**](https://www.237online.com/author/alain-basile-djomo/)[9 février 2020](https://www.237online.com/cameroun-le-senat-salue-le-bon-deroulement-des-elections-regionales/" \t "_self)

[Temps de lecture 1 minute](https://www.237online.com/cameroun-le-senat-salue-le-bon-deroulement-des-elections-regionales/" \t "_self)

[[Pinterest](https://www.237online.com/cameroun-le-senat-salue-le-bon-deroulement-des-elections-regionales/" \t "_self)](https://pinterest.com/pin/create/button/?url=https://www.237online.com/les-separatistes-ambazoniens-accusent-maurice-kamto-dutiliser-la-crise-anglophone-pour-arriver-pouvoir/&description=Les%20s%C3%A9paratistes%20ambazoniens%20accusent%20Maurice%20Kamto%20d%E2%80%99utiliser%20la%20crise%20anglophone%20pour%20arriver%20pouvoir&media=https://www.237online.com/wp-content/uploads/2020/02/ambazonien-de-toronto.jpg)[[Reddit](https://www.237online.com/cameroun-le-senat-salue-le-bon-deroulement-des-elections-regionales/" \t "_self)](https://reddit.com/submit?url=https://www.237online.com/les-separatistes-ambazoniens-accusent-maurice-kamto-dutiliser-la-crise-anglophone-pour-arriver-pouvoir/&title=Les%20s%C3%A9paratistes%20ambazoniens%20accusent%20Maurice%20Kamto%20d%E2%80%99utiliser%20la%20crise%20anglophone%20pour%20arriver%20pouvoir)

[La paume de discorde serait le refus de Kamto de les recevoir parce qu’ils arboraient les symboles de l’Ambazonie.](https://www.237online.com/cameroun-le-senat-salue-le-bon-deroulement-des-elections-regionales/" \t "_self)

[Le séjour du Pr Maurice Kamto Président du Mouvement pour la Renaissance du Cameroun (MRC) en occident, est loin d’être un long fleuve tranquille. En tout cas le moins qu’on puisse dire, est qu’il ne récolte pas que des lauriers dans son périples occidental. En plus de l’ex Président français Nicolas Sarkozy qui n’avait pas vu d’un bon œil le meeting de Paris, et les thuriféraires du régime de Yaoundé, le leader du MRC a eu maille à partir avec les sécessionnistes anglophones lors de son passage à Toronto, au Canada. Ceux-ci très remontés l’accusent d’utiliser la crise anglophone pour arriver au pouvoir.](https://www.237online.com/cameroun-le-senat-salue-le-bon-deroulement-des-elections-regionales/" \t "_self)

[En effet, des militants ambazoniens de Toronto au Canada ont exprimé leur ras-le-bol après que le Pr Maurice Kamto ait refusé de leur accorder une audience parce qu’ils portaient des insignes ambazoniens en plus du drapeau d’Ambazonie. Selon le Secrétaire Général des ambaboys et membre de la Southern Relief, organisation basée à Toronto Efuange Khumbah, Maurice Kamto leur a demandé en cachette d’enlever leurs T-shirts et drapeaux ambazoniens, parce qu’il ne voulait pas que les gens le voient avec les ambazoniens. «](https://www.237online.com/cameroun-le-senat-salue-le-bon-deroulement-des-elections-regionales/" \t "_self)*[Il voulait que nous supprimions tout ce qui concernait l’Ambazonie. Mais nous avions deux grands-mères qui portaient des T-shirts Amba, alors nous avons insisté pour que nous ne le fassions pas »](https://www.237online.com/cameroun-le-senat-salue-le-bon-deroulement-des-elections-regionales/" \t "_self)*[, a poursuivi Efuange, avant de conclure «](https://www.237online.com/cameroun-le-senat-salue-le-bon-deroulement-des-elections-regionales/" \t "_self)*[Maintenant le professeur Kamto utilise la crise anglophone pour se positionner sur la scène politique. Il nous demande de venir mais il veut qu’on cache nos apparats ambazoniens. C’est un manipulateur et opportunist](https://www.237online.com/cameroun-le-senat-salue-le-bon-deroulement-des-elections-regionales/" \t "_self)*[e ».](https://www.237online.com/cameroun-le-senat-salue-le-bon-deroulement-des-elections-regionales/" \t "_self)

[Pour peu qu’on s’en tienne aux propos du SG des ambazoniens de Toronto, il faut dire que la politique n’a pas fini de nous révéler son secret. Kamto serait donc en train d’exploiter les anglophones mécontents à des fins égoïstes, toute chose qui du point éthique est indécent. Pire encore il traite avec les ambazoniens mais ne veut pas s’afficher avec eux.](https://www.237online.com/cameroun-le-senat-salue-le-bon-deroulement-des-elections-regionales/" \t "_self)

<https://www.237online.com/les-separatistes-ambazoniens-accusent-maurice-kamto-dutiliser-la-crise-anglophone-pour-arriver-pouvoir/>

1. **Crise anglophone: Qui est le général Success NKONGHO qui a déposé les armes ?**

[**237online**](https://www.237online.com/author/237online/)6 janvier 2020

 Temps de lecture 1 minute

[Pinterest](https://pinterest.com/pin/create/button/?url=https://www.237online.com/crise-anglophone-qui-est-le-general-success-nkongho-qui-a-depose-les-armes/&description=Crise%20anglophone%3A%20Qui%20est%20le%20g%C3%A9n%C3%A9ral%20Success%20NKONGHO%20qui%20a%20d%C3%A9pos%C3%A9%20les%20armes%20%3F&media=https://www.237online.com/wp-content/uploads/2020/01/Success-NKONGHO.jpg) [Reddit](https://reddit.com/submit?url=https://www.237online.com/crise-anglophone-qui-est-le-general-success-nkongho-qui-a-depose-les-armes/&title=Crise%20anglophone%3A%20Qui%20est%20le%20g%C3%A9n%C3%A9ral%20Success%20NKONGHO%20qui%20a%20d%C3%A9pos%C3%A9%20les%20armes%20%3F)

Pasteur d’une église pentecôtiste, Success Nkongho est originaire d’Eyumojock, localité située au sud-ouest anglophone, à la frontière avec le Nigeria.

Au moment où la crise éclate en octobre 2016, Success vit à Limbé, cité balnéaire située au sud-ouest anglophone. Success Nkongho profite du déclenchement de la crise socio-politiques pour créer au début de 2017 depuis le Nigeria, Eyumojock Self Defence Forces, un groupe armé composé de milliers de membres qui va vite s’imposer sur le terrain.

C’est ainsi que Success Nkongho va être contacté par Lucas Ayaba Cho, le commandant-en-chef des Ambazonians Defences Forces (ADF), l’une des branches militaires du mouvement sécessionniste anglophone, qui lui envoie 10 000 dollars chaque mois pour l’achat des armes au Nigeria. En juillet 2017, lorsqu’il arrive au Nigeria au conclave du Southern Cameroons Ambazonia Consortium United Front (SCACUF) qui a porté Sisiku Ayuk Tabe à sa tête, Ayaba Cho et li ne parviennent plus à s’entendre sur comment diriger la révolution. Ayabo Cho d’ailleurs le menace de mort mais se calme finalement à cause de la ténacité et de la peur qu’il aura du général pasteur. Menacé de mort par les hommes de Ayabo Cho au Cameroun d’une part et d’une autre menacé par la pression de l’armée camerounaise, il choisi de se réfugier au Nigeria.

Le 31 décembre dernier à l’aéroport de Yaoundé, Success Nkongho revient en tant que ex-réfugié parti du Cameroun du fait de la guerre. Il avait été admis au statut de réfugié parce qu’il avait accepté de démobiliser ses combattants de Eyumojock Self Defence Forces et de les faire tous retourner dans le camp au Nigeria.

<https://www.237online.com/crise-anglophone-qui-est-le-general-success-nkongho-qui-a-depose-les-armes/>

1. **Crise Anglophone: Des sécessionnistes connus accusent la fondation Ayah Abine d'être le bras armé de la guerre**

[**237online**](https://www.237online.com/author/237online/)6 janvier 2020

 Temps de lecture 1 minute

Il s’appelle Dr Success Nkongho.

L’un des plus farouches terroristes ambazoniens qui répondit présent à l’appel de la  »République » après avoir laissé les armes.

Sauf que depuis ce jour, il est considéré comme traître par les siens qui lui envoient des menaces de mort. Alors, il a décidé qu’avant de se faire tuer, il va tout déballer. Ce qu’il a donc commencer à faire sur sa page facebook depuis quelques jours. Sa première cible : la  »Fondation Paul Ayah Abine ». L’ex terroriste affirme que cette association humanitaire n’est que le bras armé de la guerre dans le NOSO.

C’est par cette organisation que les activistes tapis à Londres, aux USA et partout dans le monde, envoient de l’argent pour l’achat du matériel de guerre et de la nourriture aux ambaboys cachés dans la forêt, ceci sous forme des levées de fonds en destination aux femmes et aux enfants réfugiés du NOSO. Il fait par la suite plusieurs déclarations sur le rôle trouble que joue le Pr Paul Ayah Abine dans la guerre au NOSO.

<https://www.237online.com/crise-anglophone-des-secessionnistes-connus-accusent-la-fondation-ayah-abine-detre-le-bras-arme-de-la-guerre/>

1. **Crise anglophone au Cameroun – Marafa Hamidou Yaya: « Les anglophones n’ont aucun recours »**

[**237online**](https://www.237online.com/author/237online/)5 septembre 2019

 3 minutes de lecture

Dans une tribune consacrée à la crise anglophone publiée le 13 décembre 2016, l’ex.Sgprc fait une série de constats.

« Lorsque, par le référendum du 20 mai 1972, le peuple camerounais a choisi de mettre fin au fédéralisme pour donner naissance à une ‘République Unie du Cameroun’’, l’ambition de tous, anglophones et francophones réunis, était de préparer l’avènement d’un Cameroun nouveau, biculturel, héritier à part égale des ‘’leçons’’ retenues des deux régences et susceptible de tirer le meilleur de ces deux héritages.

Les évènements actuels prouvent suffisamment que ce projet a échoué. Deux identités camerounaises distinctes coexistent aujourd’hui, et les anglophones éprouvent à raison le sentiment d’être marginalisés, d’être des citoyens d’un rang inférieur à celui des francophones. Le bilinguisme inscrit dans notre Constitution était appliqué de façon profondément inégalitaire dans l’administration, la justice et l’enseignement, ils ne jouissent pas de l’égalité des chances qui devrait être accordée à tous les citoyens d’un Etat moderne et démocratique.

Cette inégalité frappe également leurs conditions de vie : ils souffrent plus encore que leurs compatriotes francophones, du chômage et du déficit en infrastructures. Et les anglophones n’ont aucun recours, aucun relais pour dénoncer ces discriminations, puisque, enfin, leur communauté est largement tenue à l’écart des postes clés de l’Etat et de l’administration, y compris au sein de leurs propres provinces ».

Il propose que « les représentants des deux communautés devraient s’asseoir autour d’une table et rédiger un nouveau code du VIVRE ENSEMBLE sur la base de l’expérience passée et des lois de décentralisation de 2004, qui sont malheureusement restées pour l’essentiel lettre morte à ce jour. Cette coopération renforcée sera propice au développement des infrastructures du Cameroun anglophone, et pourrait par exemple aboutir à la construction d’un nouvel aéroport international ou à la construction d’une université jumelée avec une institution prestigieuse internationale offrant des formations spécifiques et de pointes (pilote, high tech…) et inexistante dans la zone francophone.

Je propose aujourd’hui qu’un Conseil National de la Réunification soit créé au plus haut niveau de l’Etat. Il se réunira tous les 6 mois pour évaluer la mise en œuvre de ce code dont la finalité sera l’avènement du Camerounais nouveau, riche de sa culture double. Pour marquer symboliquement mais puissamment la rupture avec la politique centralisatrice que mène le gouvernement depuis plus de trente ans, je propose également que notre pays retrouve son appellation de ‘’République Unie du Cameroun’’ ainsi que le drapeau arborant deux étoiles jaunes sur la bande verte, au lieu d’une étoile jaune sur la bande rouge comme c’est actuellement le cas’’.

A la suite de ces propositions, le Président Biya déclarera dans son discours de la fin d’année 2016 : « *les voix qui se sont exprimées ont été toutes entendues. Elles ont dans bien des cas, soulevé des questions de fonds que l’on ne saurait négliger… Nous sommes disposés, à la suite et dans l’esprit des artisans de la Réunification, à créer une structure nationale dont la mission sera de nous proposer des solutions pour maintenir la paix, consolider l’unité de notre pays et renforcer notre volonté et notre Pratique quotidienne du VIVRE ENSEMBLE. …*’’

Mais, au lieu d’adresser l’ensemble des ‘’questions de fond’’ soulevées, comme lui-même l’a relevé, le président Biya s’est contenté de créer, par décret du 23 janvier 2017, une ‘’*commission Nationale pour la Promotion du Bilinguisme et du Multiculturalisme*’’, un organe essentiellement administratif qui, de l’avis de l’ensemble des observateurs de la scène politique camerounaise, n’est pas à la hauteur des enjeux.

Dans une interview accordée au journal en ligne ‘Slate Afrique’ le 12 janvier 2013, à la question ‘’*Vos propos semblent dégager le Président Biya de toute responsabilité dans la gestion des affaires du pays, et dans la vôtre en particulier’*’ Marafa Hamidou Yaya répond :

« *Non pas du tout, je ne l’exonère pas. Seulement, alors que tout le monde s’accorde pour connaitre en lui un habile politicien, il pose désormais des actes qui ne lui ressemblent guère, et qui créent dans notre pays une situation de tension sans précédent depuis 1984. Il ne me semble donc pas avoir les mains libres. Ce qui est déjà une faute extrêmement grave, il est vrai*».

Il ajoute : «*A chaque fois, au cours de ces 30 ans, que Paul Biya a eu à choisir entre la modernisation politique et économique de notre pays avec les risques de perturbations inhérents à cette démarche, et l’immobilisme garant, selon lui, de la paix civile, il a choisi l’immobilisme. C’est ce qui fait que nous avons aujourd’hui un pays au bord des conflits sociaux et politiques sans précédents*».

<https://www.237online.com/crise-anglophone-au-cameroun-marafa-hamidou-yaya-les-anglophones-nont-aucun-recours/>

1. **Crise anglophone au Cameroun – Akere Muna : « Il faut donc trouver un tiers »**

[**237online**](https://www.237online.com/author/237online/)4 septembre 2019

 Temps de lecture 1 minute

Lire l’extrait d’une interview de Maître Akere Muna accordée au journal panafricain Jeune Afrique.

« D’abord, il faut se parler. Ensuite, il est impératif de ramener les choses au plus prêt de la situation telle qu’elle l’était il y a deux ans, c’est-à-dire libérer les détenus, les amnistier et mettre en place les conditions nécessaires pour le désarmement. Et ce n’est pas cette armée qui le fera, il faut donc trouver un tiers. Comme la Belgique, le Canada, la Suisse, ou un pays qui n’est pas partie prenante, vu que certains sont réticents à une intervention de l’ONU.

Ce pays devra accepter de venir avec une force tampon qui se déploiera dans les zones en crise et procédera au désarmement. Ensuite, il devra passer à la réhabilitation et à la reconstruction des villages et faire revenir les habitants chez eux. Il faut qu’on essaye au maximum de revenir au statu quo ante. Lorsqu’on l’aura fait, on pourra alors commencer à attaquer les questions globales du cadre dans lequel nous souhaitons vivre »
Pas du tout. Je décline une stratégie nationale de réconciliation.

Et je dis qu’en ce qui concerne le désarmement, il est utopique de penser que les soldats de l’armée qui étaient là hier, qui ont vu leurs camarades tués, vont se placer en face des combattants ambazoniens, qui peuvent reconnaître certains d’entre eux, et que ces derniers vont accepter de leur remettre des armes.

Avec l’amertume, la situation ira dans tous les sens. Il faudrait que ce soit fait derrière un écran, c’est un rôle que peut jouer un autre pays. Celui-ci serait invité par le Cameroun selon des conditions précises édictées, et partirait ensuite après le travail fait. Mais penser que c’est cette armée qui procédera au désarmement, cela va être très difficile pour les deux camps ».

<https://www.237online.com/crise-anglophone-au-cameroun-akere-muna-il-faut-donc-trouver-un-tiers/>

1. **Crise anglophone au Cameroun – Dr. Christoph Hoffmann: « Il y a une guerre civile »**

[**237online**](https://www.237online.com/author/237online/)4 septembre 2019

 2 minutes de lecture

[Pinterest](https://pinterest.com/pin/create/button/?url=https://www.237online.com/crise-anglophone-au-cameroun-dr-christoph-hoffmann-il-y-a-une-guerre-civile/&description=Crise%20anglophone%20au%20Cameroun%20%E2%80%93%20Dr.%20Christoph%20Hoffmann%3A%20%C2%AB%C2%A0Il%20y%20a%20une%20guerre%20civile%C2%A0%C2%BB&media=https://www.237online.com/wp-content/uploads/2019/09/cropped-Christoph-Hoffmann.jpg) [Reddit](https://reddit.com/submit?url=https://www.237online.com/crise-anglophone-au-cameroun-dr-christoph-hoffmann-il-y-a-une-guerre-civile/&title=Crise%20anglophone%20au%20Cameroun%20%E2%80%93%20Dr.%20Christoph%20Hoffmann%3A%20%C2%AB%C2%A0Il%20y%20a%20une%20guerre%20civile%C2%A0%C2%BB)

Lire le Discours de Dr. Christoph Hoffmann, Parti Démocrate Libéral, le 11 Octobre 2018, à l’Assemblé Nationale Allemande, sur la crise politique au Cameroun.

« Monsieur le Président, Mesdames et Messieurs,
Dans la partie anglophone du Cameroun, il y a une guerre civile. C’est la dernière station d’un long échec du gouvernement de Yaoundé, qui depuis 20 ans a échoué ou n’a pas voulu la régionalisation promise dans la Constitution.

Dans la partie anglophone, les écoles sont fermées depuis deux ans. Des enfants se font tirer dessus par l’armée. Des personnes âgées sont brûlées vives dans des maisons incendiées par l’armée. 300 000 personnes sont en fuite dans leur propre pays, 30000 ont fui au Nigeria. Les champs d’une région particulièrement fertile ne seront plus cultivés, la faim suivra.

Vous voyez, nous dérivons vers une catastrophe humanitaire. L’Allemagne fournit une aide au développement au Cameroun depuis 50 ans. Malgré tout cet argent, il n’a pas été possible de stabiliser le pays de manière décisive. Et le gouvernement Allemand ne se préoccupe pas assez, et surtout beaucoup trop tard, des conflits en Afrique dans son ensemble. Ces conflits sont prévisibles et peuvent être résolus

Comme je l’ai dit, la réaction a été beaucoup trop lente et, le cas échéant, comme dans le cas de la crise camerounaise : nous avions déposé notre motion en juin dans cette assemblé et nous sommes maintenant heureux de pouvoir enfin en débattre cinq mois plus tard.

Pourquoi la boîte à outils de prévention des crises n’est-elle pas déballée à temps ? Quels ont été les efforts ou les succès du gouvernement fédéral Allemand dans le lancement d’une initiative de l’Union Européenne dans ce domaine ? Où sont les efforts déployés par l’Allemagne au Conseil de Sécurité de l’ONU pour prévenir ou du moins atténuer cette catastrophe ? Où est la pression multilatérale ?
Le conflit dans la partie anglophone du Cameroun est un conflit tout à fait inutile et cruel et la toute dernière chose dont cette population pauvre peut avoir besoin actuellement. Hélas, il n’y a pas de fin en vue.

Comme l’oratrice précédente l’a mentionné à juste titre, les préoccupations de la population anglophone sont justifiées. La solution peut résider dans la régionalisation ou le fédéralisme, et l’Allemagne a une assez bonne expérience du fédéralisme et de l’autonomie régionale. L’Allemagne peut donc se proposer beaucoup mieux en tant que médiateur qu’elle ne l’a fait jusqu’à présent, ou ne l’a pas fait du tout.

Dimanche dernier, les Camerounais ont voté et il faudra attendre 14 jours avant que le scrutin ne soit dépouillé. Ensuite, le leader de 85 ans qui préfère vivre plusieurs mois à l’extérieur du pays dans des étages entiers d’hôtels 5 étoiles sera de nouveau déclaré président.

Sur les 24 millions de Camerounais, seuls 6,5 millions étaient inscrits pour l’élection et, dans la partie anglophone, les élections n’ont pas eu lieu. Et une élection qui n’est pas juste, dans un État de droit qui ne l’est pas, ne peut être acceptée. La communauté internationale doit donc négocier une phase de transition post-électorale au cours de laquelle la réconciliation nationale sera possible et peut-être un retrait du Président aussi.

Monsieur Maas et Madame Merkel, vous devez également prendre l’initiative, enfin d’agir, au lieu de devoir utiliser à nouveau l’argent des contribuables pour des aides d’urgence. Une inaction ne peut pas être dans notre intérêt, sinon l’écrivain américano-nigérian Cole aura encore raison de dire : le sauveur blanc tolère la politique brutale le matin, fonde une organisation humanitaire dans l’après-midi et reçoit un prix le soir pour cela. Il faut mettre enfin un terme à tout cela, réveillez-vous, Monsieur Maas. »

<https://www.237online.com/crise-anglophone-au-cameroun-dr-christoph-hoffmann-il-y-a-une-guerre-civile/>

1. **Crise anglophone au Cameroun: Le Royaume-Uni pour un dialogue « nécessaire et urgent »**

[**237online**](https://www.237online.com/author/237online/)4 septembre 2019

 Moins d’une minute

La proposition a été faite hier par Boris Johnson, Secrétaire d‘État des Affaires étrangères et du Commonwealth.

C‘était lors d’un entretien avec le Premier ministre camerounais, Philémon Yang, en marge du sommet du Commonwealth qui se tient depuis lundi à Londres.

« Il y a nécessité urgente de poursuivre le dialogue, la décentralisation et le respect des droits humains dans les régions anglophones comme l’a déjà commencé à faire le président Paul Biya.

Le Royaume-Uni soutiendra la paix, la prospérité et la sécurité pour nos amis au Cameroun », peut-on lire sur la page Twitter de Boris Johnson.

<https://www.237online.com/crise-anglophone-au-cameroun-le-royaume-uni-pour-un-dialogue-necessaire-et-urgent/>

1. **Crise anglophone au Cameroun – Emmanuel Macron: « La France est prête pour apporter son appui »**

[**237online**](https://www.237online.com/author/237online/)4 septembre 2019

 Moins d’une minute

[Pinterest](https://pinterest.com/pin/create/button/?url=https://www.237online.com/crise-anglophone-au-cameroun-emmanuel-macron-la-france-est-prete-pour-apporter-son-appui/&description=Crise%20anglophone%20au%20Cameroun%20%E2%80%93%20Emmanuel%20Macron%3A%20%C2%AB%C2%A0La%20France%20est%20pr%C3%AAte%20pour%20apporter%20son%20appui%C2%A0%C2%BB&media=https://www.237online.com/wp-content/uploads/2019/03/cropped-macron-telephone-1.jpg) [Reddit](https://reddit.com/submit?url=https://www.237online.com/crise-anglophone-au-cameroun-emmanuel-macron-la-france-est-prete-pour-apporter-son-appui/&title=Crise%20anglophone%20au%20Cameroun%20%E2%80%93%20Emmanuel%20Macron%3A%20%C2%AB%C2%A0La%20France%20est%20pr%C3%AAte%20pour%20apporter%20son%20appui%C2%A0%C2%BB)

S’agissant des régions anglophones du Cameroun, la France est prête pour apporter son appui aux initiatives que vous pourriez prendre pour progresser vers un règlement politique et pérenne de la crise qui y sévit.

Je forme le vœu que de telles initiatives prennent corps au plus vite car l’aggravation continue de la situation dans ces régions est une préoccupation profonde pour la France et l’ensemble des partenaires extérieurs du Cameroun.

<https://www.237online.com/crise-anglophone-au-cameroun-emmanuel-macron-la-france-est-prete-pour-apporter-son-appui/>

1. **Crise anglophone au Cameroun – Heather Nauert: « Les recours à la force sont inacceptables »**

[**237online**](https://www.237online.com/author/237online/)4 septembre 2019

 Temps de lecture 1 minute

[Pinterest](https://pinterest.com/pin/create/button/?url=https://www.237online.com/crise-anglophone-au-cameroun-heather-nauert-les-recours-a-la-force-sont-inacceptables/&description=Crise%20anglophone%20au%20Cameroun%20%E2%80%93%20Heather%20Nauert%3A%20%C2%AB%C2%A0Les%20recours%20%C3%A0%20la%20force%20sont%20inacceptables%C2%A0%C2%BB&media=https://www.237online.com/wp-content/uploads/2019/09/cropped-heather-nauert.jpg) [Reddit](https://reddit.com/submit?url=https://www.237online.com/crise-anglophone-au-cameroun-heather-nauert-les-recours-a-la-force-sont-inacceptables/&title=Crise%20anglophone%20au%20Cameroun%20%E2%80%93%20Heather%20Nauert%3A%20%C2%AB%C2%A0Les%20recours%20%C3%A0%20la%20force%20sont%20inacceptables%C2%A0%C2%BB)

La réaction de Heather Nauert, porte-parole du secrétaire d’Etat américain.

Par la voix du porte-parole du secrétariat d’Etat américain, Heather Nauert, Washington estime que « Les recours à la force du gouvernement camerounais pour restreindre la liberté d’expression et l’Assemblée pacifique par les manifestants, sont inacceptables ».

Puis d’exhorter « le gouvernement du Cameroun à respecter les droits de l’homme et la liberté d’expression, y compris l’accès à Internet ». La Maison blanche invite enfin « toutes les parties à exercer une certaine contrainte à la violence et à engager un dialogue pour une résolution pacifique et durable » des divergences.

Pour Donald Trump « c’est l’aspiration profonde des peuples à la liberté et à la démocratie qui amène les régimes dictatoriaux à restreindre l’accès à Internet, détruire les antennes paraboliques, tirer sur les manifestants pacifiques non armés et emprisonner les réformateurs politiques. (..)

Les régimes oppresseurs ne peuvent durer pour toujours, et le jour viendra où les peuples seront confrontés à un choix, » avait lâché le 45è chef d’Etat américain.

<https://www.237online.com/crise-anglophone-au-cameroun-heather-nauert-les-recours-a-la-force-sont-inacceptables/>

1. **Crise anglophone au Cameroun – Union Européenne: « Qu’un processus de dialogue soit lancé au plus tôt avec tous les acteurs »**

[**237online**](https://www.237online.com/author/237online/)4 septembre 2019

 Temps de lecture 1 minute

[Pinterest](https://pinterest.com/pin/create/button/?url=https://www.237online.com/crise-anglophone-au-cameroun-union-europeenne-quun-processus-de-dialogue-soit-lance-au-plus-tot-avec-tous-les-acteurs/&description=Crise%20anglophone%20au%20Cameroun%20%E2%80%93%20Union%20Europ%C3%A9enne%3A%20%C2%AB%C2%A0Qu%E2%80%99un%20processus%20de%20dialogue%20soit%20lanc%C3%A9%20au%20plus%20t%C3%B4t%20avec%20tous%20les%20acteurs%C2%A0%C2%BB&media=https://www.237online.com/wp-content/uploads/2019/04/cropped-Union-europeenne-parlement.jpg) [Reddit](https://reddit.com/submit?url=https://www.237online.com/crise-anglophone-au-cameroun-union-europeenne-quun-processus-de-dialogue-soit-lance-au-plus-tot-avec-tous-les-acteurs/&title=Crise%20anglophone%20au%20Cameroun%20%E2%80%93%20Union%20Europ%C3%A9enne%3A%20%C2%AB%C2%A0Qu%E2%80%99un%20processus%20de%20dialogue%20soit%20lanc%C3%A9%20au%20plus%20t%C3%B4t%20avec%20tous%20les%20acteurs%C2%A0%C2%BB)

La déclaration du porte-parole de l’Union Européenne.

« Suite à la proclamation des résultats de l’élection présidentielle au Cameroun par le Conseil Constitutionnel, l’Union européenne invite le Président élu à rallier toutes les parties prenantes, afin de surmonter, dans l’intérêt de tous les Camerounais, les défis auxquels le pays fait face.
Si les élections se sont globalement tenues dans le calme, une partie de la population n’a pas été en mesure de participer au vote.

L’UE rappelle sa préoccupation par rapport à la situation dans les régions du Nord-Ouest et du Sud-Ouest du pays. Il demeure important que les autorités soient à l’écoute des propositions de la société civile et des autorités religieuses pour une résolution pacifique et durable de la crise, et qu’un processus de dialogue soit lancé au plus tôt avec tous les acteurs en faveur de la paix.

La déclaration préliminaire de la Mission d’observation électorale de l’Union Africaine recommande un renforcement du cadre légal et institutionnel des élections au Cameroun, de le rendre plus inclusif, de manière à accroître la confiance des électeurs envers le processus électoral.

L’Union européenne considère de telles réformes comme cruciales et se tient prête à accompagner ce processus. Elle note en particulier que tous les recours introduits par les candidats de l’opposition ont été rejetés.

L’Union européenne, partenaire important du Cameroun, continuera à œuvrer pour le développement et la stabilité du pays au bénéfice de tous les Camerounais».

<https://www.237online.com/crise-anglophone-au-cameroun-union-europeenne-quun-processus-de-dialogue-soit-lance-au-plus-tot-avec-tous-les-acteurs/>

1. **Crise anglophone au Cameroun – António Guterres: « Le dialogue est le meilleur moyen de préserver l’unité »**

[**237online**](https://www.237online.com/author/237online/)4 septembre 2019

 Temps de lecture 1 minute

[Pinterest](https://pinterest.com/pin/create/button/?url=https://www.237online.com/crise-anglophone-au-cameroun-antonio-guterres-le-dialogue-est-le-meilleur-moyen-de-preserver-lunite/&description=Crise%20anglophone%20au%20Cameroun%20%E2%80%93%20Ant%C3%B3nio%20Guterres%3A%20%C2%AB%C2%A0Le%20dialogue%20est%20le%20meilleur%20moyen%20de%20pr%C3%A9server%20l%E2%80%99unit%C3%A9%C2%A0%C2%BB&media=https://www.237online.com/wp-content/uploads/2019/09/cropped-Antonio-Guterres.jpg) [Reddit](https://reddit.com/submit?url=https://www.237online.com/crise-anglophone-au-cameroun-antonio-guterres-le-dialogue-est-le-meilleur-moyen-de-preserver-lunite/&title=Crise%20anglophone%20au%20Cameroun%20%E2%80%93%20Ant%C3%B3nio%20Guterres%3A%20%C2%AB%C2%A0Le%20dialogue%20est%20le%20meilleur%20moyen%20de%20pr%C3%A9server%20l%E2%80%99unit%C3%A9%C2%A0%C2%BB)

Le Secrétaire général des nations Unies a été préoccupé par les incidents de sécurité dans le sud-ouest et nord-ouest du pays.

Lire les propositions d’António Guterres, Secrétaire général de l’Onu.

« Le Secrétaire général est profondément préoccupé par la situation au Cameroun, notamment au vu des récents incidents sécuritaires à Bamenda et à Douala et de la montée des tensions dans les régions du sud-ouest et du nord-ouest liées aux événements prévus le 1er octobre.

Le Secrétaire général a encouragé les autorités camerounaises à poursuivre leurs efforts pour résoudre les griefs de la communauté anglophone.

Il les exhorte à promouvoir des mesures de réconciliation nationale visant à trouver une solution durable à la crise, y compris en traitant ses causes profondes.

Le Secrétaire général souligne l’importance de faire prévaloir l’unité et l’intégrité territoriale du Cameroun et enjoint toutes les parties à s’abstenir d’actes susceptibles de mener à une escalade des tensions et de la violence.

Le Secrétaire général est convaincu qu’un dialogue véritable et inclusif entre le Gouvernement et les communautés des régions du sud-ouest et du nord-ouest est le meilleur moyen de préserver l’unité et la stabilité du pays.

Le Secrétaire général est prêt à soutenir ces efforts, notamment à travers le Bureau régional des Nations Unies pour l’Afrique centrale (UNOCA) »

<https://www.237online.com/crise-anglophone-au-cameroun-antonio-guterres-le-dialogue-est-le-meilleur-moyen-de-preserver-lunite/>

1. **Crise anglophone: Un policier abattu à Bamenda par des séparatistes**

[**237online**](https://www.237online.com/author/237online/)16 août 2019

 Moins d’une minute

[Pinterest](https://pinterest.com/pin/create/button/?url=https://www.237online.com/crise-anglophone-un-policier-abattu-a-bamenda-par-des-separatistes/&description=Crise%20anglophone%3A%20Un%20policier%20abattu%20%C3%A0%20Bamenda%20par%20des%20s%C3%A9paratistes&media=https://www.237online.com/wp-content/uploads/2019/08/cropped-NGALA-Elvis-.jpg) [Reddit](https://reddit.com/submit?url=https://www.237online.com/crise-anglophone-un-policier-abattu-a-bamenda-par-des-separatistes/&title=Crise%20anglophone%3A%20Un%20policier%20abattu%20%C3%A0%20Bamenda%20par%20des%20s%C3%A9paratistes)

NGALA Elvis c’est son nom.

Gardien de la paix de 2e grade, Il est tombé hier 15 août 2019 dans la soirée à mile 90 à Bamenda suite à une attaque de la patrouille à laquelle il participait, par des forces indépendantistes anglophones, nous confie une source policière.

D’après les témoignages de certaine personnes, plusieurs hôtels dans les ville de Buea, Mutenguene et Kumba sont envahis par les militaires vêtus en civil.

Rappelons que la crise socio-politique anglophone fait déjà, depuis 3 ans qu’elle dure fait environ 2 000 morts et des milliers de déplacés internes et externes.

<https://www.237online.com/crise-anglophone-un-policier-abattu-a-bamenda-par-des-separatistes/>

1. **Crise anglophone: Le Canada disposé à aider le Cameroun dans la recherche d’une solution interne**

[**237online**](https://www.237online.com/author/237online/)24 juillet 2019

 Temps de lecture 1 minute

[Pinterest](https://pinterest.com/pin/create/button/?url=https://www.237online.com/crise-anglophone-le-canada-dispose-a-aider-le-cameroun-dans-la-recherche-dune-solution-interne/&description=Crise%20anglophone%3A%20Le%20Canada%20dispos%C3%A9%20%C3%A0%20aider%20le%20Cameroun%20dans%20la%20recherche%20d%E2%80%99une%20solution%20interne&media=https://www.237online.com/wp-content/uploads/2019/07/cropped-Nathalie-ONeil-canada.jpg) [Reddit](https://reddit.com/submit?url=https://www.237online.com/crise-anglophone-le-canada-dispose-a-aider-le-cameroun-dans-la-recherche-dune-solution-interne/&title=Crise%20anglophone%3A%20Le%20Canada%20dispos%C3%A9%20%C3%A0%20aider%20le%20Cameroun%20dans%20la%20recherche%20d%E2%80%99une%20solution%20interne)

C’est le message passé à Paul Biya par Nathalie O’Neil, Haut-Commissaire du Canada au Cameroun, arrivée en fin de séjour.

Nathalie O’Neil, Haut-Commissaire du Canada au Cameroun, a indiqué ce 24 juillet 2019, que son pays est prêt à accompagner le Cameroun dans la recherche des solutions internes à la crise en cours dans les régions anglophones du Nord-Ouest et du Sud-Ouest.

«Nous avons parlé de la situation qui prévaut en ce moment dans les régions anglophones du Cameroun. Et le Président le sait très bien, je lui ai répété que le Canada, si on peut lui être utile, nous serons toujours heureux de l’appuyer dans la recherche de solutions camerounaises à ce problème», a déclaré la diplomate canadienne au terme d’un entretien avec Paul Biya au palais de l’Unité.

Ottawa, à travers cette sortie, rejoint la Suisse, qui pense que la solution à la crise anglophone doit être camerouno-camerounaise.

Mme O’Neil, arrivée en fin de séjour après deux années passées en terre camerounaise, est venue dire ses adieux au Président de la République.

Elle en a profité pour revisiter avec le Chef de l’Etat, les axes de la coopération de 50 ans entre le Cameroun et le Canada, notamment l’économie, la politique et la culture. Ce dernier volet a occupé une bonne partie des près de 60 minutes de l’audience.

«Nous avons beaucoup parlé de bilinguisme et de multiculturalisme. Le Canada est un pays qui partage les mêmes langues officielles que le Cameroun (anglais et Français). Depuis que je suis arrivée, nous avons beaucoup travaillé sur ce dossier-là avec la Commission (camerounaise du bilingue et du multiculturalisme) et avec d’autres partenaires», a ajouté la diplomate.

<https://www.237online.com/crise-anglophone-le-canada-dispose-a-aider-le-cameroun-dans-la-recherche-dune-solution-interne/>

1. **Crise anglophone: La Brigade anti-sardinards veut être associée au processus de dialogue entamé en Suisse**

[**237online**](https://www.237online.com/author/237online/)12 juillet 2019

 Temps de lecture 1 minute

[Pinterest](https://pinterest.com/pin/create/button/?url=https://www.237online.com/crise-anglophone-la-brigade-anti-sardinards-veut-etre-associee-au-processus-de-dialogue-entame-en-suisse/&description=Crise%20anglophone%3A%20La%20Brigade%20anti-sardinards%20veut%20%C3%AAtre%20associ%C3%A9e%20au%20processus%20de%20dialogue%20entam%C3%A9%20en%20Suisse&media=https://www.237online.com/wp-content/uploads/2019/06/cropped-Brigade-anti-sardinards.jpg) [Reddit](https://reddit.com/submit?url=https://www.237online.com/crise-anglophone-la-brigade-anti-sardinards-veut-etre-associee-au-processus-de-dialogue-entame-en-suisse/&title=Crise%20anglophone%3A%20La%20Brigade%20anti-sardinards%20veut%20%C3%AAtre%20associ%C3%A9e%20au%20processus%20de%20dialogue%20entam%C3%A9%20en%20Suisse)

La branche helvétique de l’organisation hostile au régime en place au Cameroun dénonce une « démarche non inclusive qui laisse de côté les principales parties prenantes ainsi que les forces vives de la nation camerounaise ».

La section suisse de la Brigade anti-sardinards n’apprécie pas la façon dont la Confédération helvétique tente de résoudre les difficultés qui se posent au Cameroun. Dans un communiqué daté du 8 juillet 2019, son porte-parole Hilaire Zoyem s’étonne de voir que pour une question qui porte sur la nature future de l’Etat camerounais, « les véritables acteurs civils de la crise anglophone » en procès ne sont pas concernés. « Nous dénonçons avec la plus grande vigueur cette démarche non inclusive qui laisse de côté les principales parties prenantes ainsi que les forces vives de la nation camerounaises dans la mesure où elle privilégie les individus au détriment des peuples concernés. Il nous semble illusoire d’entamer un dialogue sans l’implication de toutes les composantes du peuple camerounais dont certains sont actuellement détenus pour des motifs politiques à l’instar de M. Ayuk Tabe et ses camarades, Mancho Bibixy et Cie, Maurice Kamto et les membres de sa coalition politique, etc », conteste-t-il.

Le responsable de la Brigade anti-sardinards en Suisse estime qu’un dialogue ne peut avoir lieu sans qu’il n’y ait eu au préalable un cessez-le-feu, une désescalade armée de même qu’un mécanisme d’aide aux réfugiés de guerre.

A l’attention du médiateur suisse, Hilaire Zoyem rappelle que « l’organisation d’un dialogue en vue de résoudre la crise anglophone ne saurait se faire sans la participation des organisations de la diaspora camerounaise qui oeuvrent depuis longtemps pour un changement démocratique au Cameroun. Il en est ainsi de la BAS, du CCT, du CCD, du CODE, etc », dénombre-t-il. Il conclut son communiqué en enjoignant les autorités suisses impliquées dans la médiation en cours d’ « exiger des parties la tenue d’un dialogue inclusif faisant appel à l’ensemble des composantes de la nation camerounaise ».

<https://www.237online.com/crise-anglophone-la-brigade-anti-sardinards-veut-etre-associee-au-processus-de-dialogue-entame-en-suisse/>

1. **Crise anglophone: après Mancho Bibixy, Paul Abine appelle à la réouverture des écoles**

[**237online**](https://www.237online.com/author/237online/)9 juillet 2019

 2 minutes de lecture

[Pinterest](https://pinterest.com/pin/create/button/?url=https://www.237online.com/crise-anglophone-apres-mancho-bibixy-paul-abine-appelle-a-la-reouverture-des-ecoles/&description=Crise%20anglophone%3A%20apr%C3%A8s%20Mancho%20Bibixy%2C%20Paul%20Abine%20appelle%20%C3%A0%20la%20r%C3%A9ouverture%20des%20%C3%A9coles&media=https://www.237online.com/wp-content/uploads/2019/07/cropped-Paul-Abine.jpg) [Reddit](https://reddit.com/submit?url=https://www.237online.com/crise-anglophone-apres-mancho-bibixy-paul-abine-appelle-a-la-reouverture-des-ecoles/&title=Crise%20anglophone%3A%20apr%C3%A8s%20Mancho%20Bibixy%2C%20Paul%20Abine%20appelle%20%C3%A0%20la%20r%C3%A9ouverture%20des%20%C3%A9coles)

L’avocat Ayah Paul Abine, ancien candidat à la présidence, a convenu avec le leader de la ‘révolution Coffin’, Mancho Bibixy Tse, qu’il n’y avait pas de plus noble cause que de faire campagne pour que les enfants retournent à l’école.

L’ancien député du RDPC a fait une sortie sur Facebook le lundi 8 juillet 2019 pour joindre sa voix à celle de Mancho emprisonné.

« Mancho Bibixy avait lancé une campagne en faveur du retour à l’école des enfants en septembre prochain. Il ne peut y avoir de cause plus noble! MAIS il reste un motif de préoccupation majeur.

Il est vrai que des images d’enfants braqués à l’école dans plusieurs pays déchirés par la guerre, notamment en Syrie, ont été vus. En outre, il est de notoriété publique que nous sommes ce que nous sommes aujourd’hui, principalement en raison de l’acquisition de connaissances issues de l’éducation formelle. Par conséquent, même les plus malhonnêtes ne douteraient pas que l’éducation formelle est primordiale pour la réussite dans la vie.

Il est inévitable que des biens soient détruits à chaque guerre. Même des établissements tels que des hôpitaux, des orphelinats et des églises sont parfois détruits. Mais une telle destruction est fortuite: elle est accidentelle (non intentionnelle). Les conséquences de tels accidents sont généralement appelées dommages collatéraux. Un autre objectif était prévu, mais il en a résulté des conséquences indésirables.

« Ce n’est cependant pas le cas de la guerre anglophone où des maisons sont délibérément rasées (…), ce qui entraîne, dans plusieurs cas, des villages entiers effacés de la surface de la terre! Ce n’est pas le cas ici Les écoles sont attaquées et / ou incendiées à dessein! Ce n’est pas le cas ici où les blessés sont extraits des hôpitaux et mis à mort par des exécutions extrajudiciaires en toute impunité! et tué!

« Ce qui est de plus et pire encore, les principales personnes visées ici sont les jeunes. Personne ne sait que même des bébés ont été abattus dans leur sommeil. Inutile de parler de jeune homme vu en mouvement!

« Face à cette insécurité persistante, où et comment l’enfant est-il en sécurité? On oserait dire qu’en l’absence d’une trêve officielle et d’une démonstration concrète de la valorisation officielle des vies humaines, en particulier des vies humaines d’Amba, retourner à l’école, c’est comme inviter à oser la mort !!! Le gouvernement doit faire beaucoup plus !!!

« En dernière analyse, c’est donc à chaque parent d’évaluer la sécurité de ses enfants à l’école et de prendre les décisions qui s’imposent. Ce que certains se disputaient jadis, c’est que les autorités d’Amba ont imposé un embargo général aux enfants scolarisés. l’embargo ayant été levé, on oserait affirmer que la participation n’est peut-être pas une résolution collective, la sécurité demeurant un enjeu majeur.

« On ne nous voit peut-être pas attirer les enfants innocents des gens dans des circonstances dangereuses: tuer pour le plaisir! Rendre les cibles molles encore plus douces! »

Mancho Bibixy fait toutefois valoir que si les enfants sont en sécurité lors d’autres activités non scolaires, ils devraient l’être également à l’école.

<https://www.237online.com/crise-anglophone-apres-mancho-bibixy-paul-abine-appelle-a-la-reouverture-des-ecoles/>

1. **Cameroun – Crise Anglophone: Un officier du BIR assassiné devant son épouse et ses enfants par des séparatistes à Bamenda**

 237online5 juillet 2019

 Temps de lecture 1 minute

Pour l’instant, les circonstances exactes de sa mort ne sont pas connues.

L’officier du BIR, Nsangou Salim a été tué ce jeudi 4 juillet par des combattants séparatistes à Bamenda dans la région du Nord-Ouest. Selon des informations, l’officier du Bataillon d’Intervention Rapide a été assassiné devant son épouse et ses enfants.

Votre journal a appris avec consternation, l’assassinat hier jeudi 04 juillet 2019, d’un officier de l’Armée camerounaise.

L’officier du Bir Nsangou Salim, a été tué par de présumés séparatistes, en présence de son épouse ( voir photo du couple), et de ses enfants, et ce, à Bamenda, dans la région du Nord-Ouest du Cameroun.

Pour le moment, les circonstances de cette fin de vie tragique et choquante de l’officier, demeurent encore voilées.

Aucune communication n’a encore été faite à ce sujet, par le gouvernement camerounais.

<https://www.237online.com/cameroun-crise-anglophone-un-officier-du-bir-assassine-devant-son-epouse-et-ses-enfants-par-des-separatistes-a-bamenda/>

1. **Crise Anglophone: Une femme enceinte et une jeune fille violées puis tuées par les sécessionnistes**

[**237online**](https://www.237online.com/author/237online/)27 juin 2019

 Moins d’une minute

Les corps d’une femme enceinte et d’une jeune fille ont été découverts hier mercredi 26/06/2019 par des villageois en état de décomposition au lieu dit Small Ekombe, à Mbongue, en proie à un conflit sur fond de revendications séparatistes entre l’armée camerounaise et les terroristes séparatistes armées anglophone.

D’après les habitants de ce village, elles auraient été violées puis tuées. Le doigt accusateur est pointé par ces derniers sur sécessionnistes anglophone semant terreur et désolation dans cette localité.

<https://www.237online.com/crise-anglophone-une-femme-enceinte-et-une-jeune-fille-violees-puis-tuees-par-les-secessionnistes/>

1. **Crise anglophone: des Sénateurs Américains assènent un coup fatal à Paul Biya**

[**237online**](https://www.237online.com/author/237online/)27 juin 2019

 3 minutes de lecture

Certains sénateurs des États-Unis demandent instamment à leur gouvernement de suspendre toute aide à la sécurité au Cameroun, craignant que cette aide ne soit utilisée dans les régions du Nord-Ouest et du Sud-Ouest sans respecter les normes internationales des droits de l’homme.

Dans une déclaration datée du mardi 25 juin 2019, les sénateurs américains Dick Durbin (D-IL), Ben Cardin (D-MD), Chris Van Hollen (D-MD) et Tim Kaine (D-VA) ont présenté un amendement à la la Loi sur l’autorisation de la défense nationale (NDAA) pour l’exercice financier 2020, visant à mettre fin à toute aide américaine supplémentaire au Cameroun en matière de sécurité, à l’exception des relations avec Boko Haram, jusqu’à ce que les secrétaires américains à la Défense et à l’État certifient que les forces militaires et de sécurité du Cameroun ont démontré des progrès Le respect des normes internationales des droits de l’homme, en particulier en ce qui concerne la répression dans les régions anglophones du pays où, selon eux, des décennies de marginalisation de la population anglophone du pays ont conduit à des tensions latentes et à la répression exercée par le gouvernement.

«*Plus tôt ce mois-ci, au centre Kovler de Chicago, j’ai entendu parler de façon dévastatrice de réfugiés qui ont fui la violence politique au Cameroun. Et la longue histoire du président Biya d’emprisonner des journalistes et de manquer de respect pour les droits de l’homme n’est pas de bon augure pour s’attaquer pacifiquement aux divisions du pays à l’époque de la colonisation* », a déclaré Durbin, sénateur de l’Illinois.

Durbin ajoute: «*C’est la raison pour laquelle j’ai proposé aux sénateurs Cardin, Van Hollen et Kaine un amendement à la NDAA pour l’année fiscale2020, qui stoppe toute aide supplémentaire des États-Unis en matière de sécurité au Cameroun, à l’exception des relations entre certifier que cette répression violente a pris fin. Lundi, j’ai dit à l’ambassadeur du Cameroun, Essomba, que les États-Unis étaient prêts à apporter leur aide dès qu’une voie pacifique serait mise de l’avant.* »

«*La force de l’Amérique réside dans nos valeurs. Nous ne pouvons rester complices d’actes utilisés pour commettre des violations flagrantes des droits de l’homme internationalement reconnus. L’assistance militaire américaine ne peut plus soutenir les forces militaires et de sécurité camerounaises qui attaquent des civils innocents* », a déclaré Ben Cardin, sénateur du Maryland.

Il a ajouté: «*Bien que le Cameroun soit un partenaire important dans la lutte contre Boko Haram et que notre amendement n’interfère pas avec ces efforts, nous devons préciser que la violence contre le peuple camerounais est inacceptable. Les écoles sont fermées. Des groupes armés attaquent des civils et en particulier des réfugiés. Le système de santé est en panne. Le gouvernement doit apporter des changements substantiels au bénéfice de la sécurité et du bien-être de la population camerounaise.*»

De son côté, le sénateur Van Hollen a déclaré: «*Lorsque nous fournissons une aide militaire à des pays étrangers, nous devons nous assurer que leurs gouvernements ne commettent pas de violations flagrantes des droits de l’homme. Je suis profondément préoccupé par les informations faisant état de violences politiques et de répression venant du Cameroun – nous ne pouvons pas fermer les yeux sur ces actions. Je suis fier de me joindre à mes collègues pour présenter cet amendement et j’exhorte le Sénat à envoyer ce message clair au gouvernement camerounais, à savoir que ces abus ne seront pas tolérés.* «

«*Je suis profondément troublé par les informations faisant état de violations flagrantes des droits de l’homme par les forces militaires camerounaises et par le mépris déclaré du président Biya pour les normes démocratiques. Cet amendement enverra un message fort au gouvernement camerounais pour lui rappeler que les États-Unis ne fermeront pas les yeux sur cette conduite et à l’administration Trump que les droits de l’homme doivent être une priorité dans nos relations bilatérales*», a déclaré le sénateur Tim Kaine.

En décembre, Durbin, Van Hollen, Cardin et Kaine ont rejoint plusieurs autres sénateurs démocrates dans une lettre au secrétaire d’État, Mike Pompeo, appelant de plus en plus l’attention des États-Unis sur la montée de la violence au Cameroun. Le lundi 24 juin 2019, le sénateur Durbin aurait rencontré l’ambassadeur du Cameroun aux États-Unis, Etoundi Essomba Henri.

<https://www.237online.com/crise-anglophone-des-senateurs-americains-assenent-un-coup-fatal-a-paul-biya/>

1. **Cameroun – Crise anglophone: Éric Chinje propose une solution ‘magique’**

[**237online**](https://www.237online.com/author/237online/)27 juin 2019

 2 minutes de lecture

[Pinterest](https://pinterest.com/pin/create/button/?url=https://www.237online.com/cameroun-crise-anglophone-eric-chinje-propose-une-solution-magique/&description=Cameroun%20%E2%80%93%20Crise%20anglophone%3A%20%C3%89ric%20Chinje%20propose%20une%20solution%20%E2%80%98magique%E2%80%99&media=https://www.237online.com/wp-content/uploads/2018/10/eric-chinje-2.jpg) [Reddit](https://reddit.com/submit?url=https://www.237online.com/cameroun-crise-anglophone-eric-chinje-propose-une-solution-magique/&title=Cameroun%20%E2%80%93%20Crise%20anglophone%3A%20%C3%89ric%20Chinje%20propose%20une%20solution%20%E2%80%98magique%E2%80%99)

Depuis quelques mois, l’ancienne star de la CRTV multiplie des initiatives et des rencontres avec certaines personnalités pour tenter de résoudre la crise qui sévit dans les régions du Nord-Ouest et du Sud-Ouest.

Éric Chinje, l’ancienne star de la Télévision camerounaise est au Cameroun depuis quelques mois. Il s’est récemment rendu au siège du quotidien Le Jour où il a échangé avec Haman Mana, le directeur de publication du journal. Plusieurs sujets d’actualité ont été abordés par les deux hommes parmi lesquels la crise qui secoue la région du Nord-Ouest d’où il est originaire.

«Eh ben, malgré toute mon envie, je n’ai pas pu y faire un tour, comme d’habitude. Je voulais aller voir la famille, en commençant ma sœur aînée. Tout le monde m’a supplié de ne pas y mettre les pieds, à cause de l’insécurité, des kidnappeurs qui devraient sauter sur l’occasion, je serais une cible intéressante pour eux. Comment dans mon pays je ne peux pas aller dans mon propre village(Santa)?», s’interroge-t-il.

«J’ai essayé depuis le début de cette crise, de faire des choses, j’ai même écrit aux «Ambas», pour éviter l’escalade. On aurait pu éviter cette crise, c’est ce que la majorité des Camerounais ne savent pas. Il y a dans ce gouvernement, des gens qui pensent que l’envoi des forces armées et la puissance de feu sont une solution. Or c’est faux. J’ai toujours déroulé ma solution, qui tient en trois points: 1) la réconciliation avec l’Histoire 2) la Gouvernance 3) Le quotidien des citoyens», explique-t-il dans les colonnes du quotidien Le Jour en kiosque ce 26 juin 2019.

Nostalgique, l’ancien employé de la Banque Mondiale et de la BAD ajoute que «les anglophones, jusqu’en 1972, vivaient une autre réalité. Un détail: il y avait des «Sanitary inspectors», en charge de veiller à la propreté des villes et des quartiers. Et le moindre déchet jeté sur la voie publique était passible d’amende. Même les personnes habillées de manière peu convenable étaient approchées par ces inspecteurs. Il y avait des «Vehicle Inspection Officers» qui veillaient à la conformité de tout ce qui circulait. Il y avait des « Commissions of enquiry », qui se déployaient, dès que l’on suspectait le moindre détournement d’argent public.La vie et le service publics étaient sains!».

« …Cette crise s’est enlisée le jour où des gens ont cru que des militaires avaient la solution. A chaque fois que l’on a un mort, c’est un Camerounais que l’on a perdu… Dans la gestion de cette crise, le gouvernement, de 2017 à nos jours, est passé d’une erreur à une autre», soutient-il.

Après deux ans de conflit, Éric Chinje espère un retour à la normale dans le Nord-Ouest et le Sud-Ouest. «J’ai rencontré quelques hauts responsables qui m’ont dit que la situation sera décantée dans 3 à 6 mois. Je ne suis pas rassuré, mais je garde espoir. Je pars sur cet espoir, que finalement, les consciences vont s’éveiller. Mais je tiens à souligner qu’au sein du gouvernement, il y a des gens qui entretiennent cette guerre. Il y a des deux côtés, des gens qui profitent du conflit. La paix dans ces conditions a-t-elle une chance? Il faut, je crois, opérer un retrait de l’armée et laisser uniquement la police…», propose l’ancienne vedette de la télévision nationale.

<https://www.237online.com/cameroun-crise-anglophone-eric-chinje-propose-une-solution-magique/>

1. **Crise Anglophone: Mancho Bibixy veut donner sa vie pour la réouverture des écoles**

[**237online**](https://www.237online.com/author/237online/)25 juin 2019

 3 minutes de lecture

[Pinterest](https://pinterest.com/pin/create/button/?url=https://www.237online.com/crise-anglophone-mancho-bibixy-veut-donner-sa-vie-pour-la-reouverture-des-ecoles/&description=Crise%20Anglophone%3A%20Mancho%20Bibixy%20veut%20donner%20sa%20vie%20pour%20la%20r%C3%A9ouverture%20des%20%C3%A9coles&media=https://www.237online.com/wp-content/uploads/2018/10/cropped-mancho-bibyxi-malade-a-la-prison-de-yde.jpg) [Reddit](https://reddit.com/submit?url=https://www.237online.com/crise-anglophone-mancho-bibixy-veut-donner-sa-vie-pour-la-reouverture-des-ecoles/&title=Crise%20Anglophone%3A%20Mancho%20Bibixy%20veut%20donner%20sa%20vie%20pour%20la%20r%C3%A9ouverture%20des%20%C3%A9coles)

La révolution du cercueil a coïncidé avec la grève déclenchée par une enseignante anglophone pour appuyer les griefs formulés à l’époque par les avocats de common law.

Le 21 novembre 2016, Mancho Bibixy, le présentateur d’une chaîne de radio locale, s’est tenu dans un cercueil, dans un rond-point bondé de la capitale Bamenda, dans la région du Nord-Ouest.

Bibixy a dénoncé la lenteur du développement économique et structurel de la ville, déclarant qu’il était prêt à mourir tout en protestant contre la marginalisation sociale et économique des personnes anglophones dans cet État francophone hégémonique.

Selon le professeur d’histoire, les journalistes, alors que les troubles dans les régions du Nord-Ouest et du Sud-Ouest du Cameroun montent en flèche, les riches ont déplacé leurs enfants dans des zones plus sûres pour étudier tandis que les pauvres en paient le prix.

Mancho regrette que la lutte actuelle aille à l’encontre des idéaux qu’il défendait – la révolution du cercueil – une lutte qui a rendu les pauvres encore plus impuissants.

Ses mots: «[le] plus grand paradoxe est que les riches ont déplacé leurs enfants dans des zones plus sûres pour étudier tandis que les pauvres en paient le prix. La révolution Coffin visait à protéger les pauvres et à lutter contre l’injustice. Nous ne pouvons pas voir les pauvres souffrir pendant que les riches ont leur chemin.

«J’ai conclu que même si je devais mourir en prison, les enfants devaient aller à l’école cette année. Laissons-les m’utiliser comme n’importe quel sacrifice pour que les écoles reprennent complètement en septembre 2019. Ça ne peut pas être plus tard que maintenant! »

Mancho se joint à Human Rights Watch et au Fonds des Nations Unies pour l’enfance, l’UNICEF, pour appeler à une rentrée scolaire effective. À l’instar de l’UNICEF, Mancho appelle les parties en présence à rouvrir leurs écoles et à créer des espaces d’apprentissage sûrs pour les enfants sans condition, étant donné que plus de 600 000 enfants se sont vu refuser l’éducation depuis 2016.

Selon l’UNICEF, quelque 1,3 million de personnes, dont environ 650 000 enfants, ont maintenant besoin d’une forme quelconque d’assistance humanitaire dans les régions du Nord-Ouest et du Sud-Ouest du Cameroun, alors que la situation en matière de sécurité et les conditions de vie continuent de se détériorer.

L’UNICEF, Fonds des Nations Unies pour l’enfance, a déclaré que les enfants et leurs familles souffraient de violences armées, d’attaques contre leurs maisons et leurs écoles, d’enlèvements, de violences s*e*xuelles et de recrutements dans des groupes armés. Les confinements imposés, ou jours de villes fantômes, mis en place par des groupes armés non étatiques, portent atteinte à la liberté de circulation des personnes et à l’acheminement de l’aide humanitaire.

Toby Fricker, porte-parole de l’UNICEF à Genève, a déclaré vendredi à Genève: «Pour de nombreux enfants, cela fait trois ans qu’ils ne sont pas entrés dans une salle de classe. En raison de l’interdiction de l’éducation par des groupes armés non étatiques et de leurs attaques, plus de 80% des écoles ont été fermées, touchant plus de 600 000 enfants. Au moins 74 écoles ont été détruites, tandis que des étudiants, des enseignants et du personnel scolaire ont été exposés à la violence, à des enlèvements et à des actes d’intimidation. Depuis 2018, plus de 300 étudiants et enseignants ont été enlevés. Après des expériences traumatisantes, ils ont tous été libérés par la suite.

«Le ciblage de l’éducation met en péril l’avenir de toute une génération d’enfants, des enfants qui, avec le soutien et les opportunités appropriés, peuvent bâtir un avenir plus stable et prospère.

«Les écoles et les salles de classe doivent offrir aux enfants des espaces sûrs pour apprendre, être avec leurs amis et rétablir un sentiment de normalité dans leur vie. Lorsque les enfants ne sont pas scolarisés, ils risquent davantage d’être recrutés par des groupes armés et sont davantage exposés au mariage des enfants, aux grossesses précoces, ainsi qu’aux traumatismes et à la détresse émotionnelle durable que ces expériences entraînent. »

Mancho Bibixy purge actuellement une peine de prison de 15 ans à la prison centrale de Yaoundé. Il a été arrêté le 19 janvier 2017 à Bamenda et jugé par le tribunal militaire de Yaoundé pour terrorisme, sécession, entre autres.

[**https://www.237online.com/crise-anglophone-mancho-bibixy-veut-donner-sa-vie-pour-la-reouverture-des-ecoles/**](https://www.237online.com/crise-anglophone-mancho-bibixy-veut-donner-sa-vie-pour-la-reouverture-des-ecoles/)

1. **Crise anglophone: près de 600 000 enfants non scolarisés en trois ans**

[**237online**](https://www.237online.com/author/237online/)24 juin 2019

 Temps de lecture 1 minute

[Pinterest](https://pinterest.com/pin/create/button/?url=https://www.237online.com/crise-anglophone-pres-de-600-000-enfants-non-scolarises-en-trois-ans/&description=Crise%20anglophone%3A%20pr%C3%A8s%20de%20600%20000%20enfants%20non%20scolaris%C3%A9s%20en%20trois%20ans&media=https://www.237online.com/wp-content/uploads/2019/01/crise-anglophone.jpg)

Le porte-parole du Fonds des Nations unies pour l’enfance (UNICEF), Toby Fricker, l’a indiqué vendredi lors d’un point de presse à Genève.

Les chiffres de l’UNICEF sont alarmants «au moins 74 écoles ont été détruites, tandis que les élèves, les enseignants et le personnel scolaire ont été exposés à la violence, aux enlèvements et à l’intimidation », a regretté vendredi le porte-parole du le Fonds des Nations Unies pour l’enfance (UNICEF), Toby Fricker, lors d’un point de presse à Genève.

Depuis trois ans, l’éducation de plus de 600 000 enfants est en péril. En raison de l’interdiction de l’éducation par des groupes armés non étatiques et des attaques, plus de 80 % des écoles ont été fermées, touchant plus de 600 000 enfants, révèle l’organisme onusien.

L’UNICEF déplore par ailleurs le kidnapping de plus de 300 élèves et enseignants depuis 2018 et des besoins humanitaires de plus en plus importants «les agences et organisation onusiennes évaluent à 1,3 million dont environ 650 000 enfants, le nombre de personnes ayant aujourd’hui besoin d’une certaine forme d’aide humanitaire dans les régions du Nord-Ouest et du Sud-Ouest du Cameroun, la situation sécuritaire et les conditions de vie ne cessant de se détériorer. Environ 450 000 de ces personnes, dont la moitié sont des enfants, sont déplacées à l’intérieur du pays.»

Selon Toby Fricker, des milliers de personnes n’ont pas accès ou ont un accès réduit aux services de base tels que les soins de santé et l’eau potable, et leurs moyens de subsistance ont été détruits. En décembre 2018, il était estimé à 40 %, le nombre d’établissements de santé de la région du Sud-Ouest hors-service.

Des difficultés qui exposent des enfants aux propositions des groupes armés, aux mariages précoces et autres fléaux. Et ce malgré le soutien apporté par les organisations «Au cours de l’année écoulée, l’UNICEF a apporté un soutien à près de 140 000 enfants. En collaboration avec ses partenaires, l’UNICEF a distribué des kits d’eau, d’assainissement et d’hygiène (WASH) à plus de 78 000 personnes», a énuméré Toby Fricker.

[**https://www.237online.com/crise-anglophone-pres-de-600-000-enfants-non-scolarises-en-trois-ans/**](https://www.237online.com/crise-anglophone-pres-de-600-000-enfants-non-scolarises-en-trois-ans/)

1. **Cameroun – Crise anglophone: Le dialogue, maintenant**

[**237online**](https://www.237online.com/author/237online/)24 juin 2019

 4 minutes de lecture

[Pinterest](https://pinterest.com/pin/create/button/?url=https://www.237online.com/cameroun-crise-anglophone-le-dialogue-maintenant/&description=Cameroun%20%E2%80%93%20Crise%20anglophone%3A%20Le%20dialogue%2C%20maintenant&media=https://www.237online.com/wp-content/uploads/2019/01/crise-anglophone.jpg) [Reddit](https://reddit.com/submit?url=https://www.237online.com/cameroun-crise-anglophone-le-dialogue-maintenant/&title=Cameroun%20%E2%80%93%20Crise%20anglophone%3A%20Le%20dialogue%2C%20maintenant)

Au cours d’une visite qu’il a effectuée début mai à Bamenda, dans le Nord-Ouest, l’une des deux régions anglophones, le Premier ministre Joseph Dion Ngute a déclaré que le pouvoir était prêt à organiser un dialogue pour résoudre le conflit avec les séparatistes.

Cette option pacifique qu’avaient déjà formulée la classe politique nationale et les organisations internationales au rang desquelles l’Union africaine, l’Union européenne et l’ONU est plus que jamais impérative.

75000 ! C’est le nombre de personnes déplacées dans les deux régions anglophones. Le chiffre officiel a été communiqué le 13 juin à Yaoundé, par le ministre de l’Administration territoriale (Minat), Paul Atanga Nji, au cours d’une cérémonie de présentation d’un convoi d’aide humanitaire dépêché par le président de la République, au profit des populations du Sud-Ouest et du Nord-Ouest, victimes des exactions des groupes séparatistes. Au-delà des personnes déplacées, l’on déplore des pertes en vies humaines. Selon l’ONG International Crisis Group, le conflit aurait fait 1 850 morts et forcé plus de 530000 personnes à fuir leur domicile. Des chiffres contestés par le gouvernement et qui sont difficiles à prouver.

L’économie en pâtit aussi. Installée dans la région anglophone du Sud-Ouest où elle exploite d’immenses plantations de bananes, d’huile de palme et d’hévéa, la Cameroon development Corporation (CDC), 2ème employeur après l’Etat, est au bord du gouffre. Un Communiqué du 14 janvier 2019, sanctionnant les travaux du Conseil d’administration de l’entreprise agroindustrielle tenue le 27 décembre 2018, signée de Benjamin Itoe Mutanga, président du Conseil d’administration de la société réputée jusqu’ici pour sa prospérité, parle de 20500 emplois menacés. Selon les estimations des opérateurs du secteur du tourisme et de la restauration, le chiffre d’affaires des hôtels a chuté de 90% dans la région anglophone du Sud-Ouest. En 2018, le Groupement interpatronal du Cameroun (Gicam) a rendu publics les résultats d’une enquête mettant en évidence les conséquences économiques et sociales de l’insécurité qui sévit actuellement dans ces régions. Selon les estimations sommaires réalisées, la crise a déjà coûté 2,153 milliards FCFA en termes de destructions de biens immobiliers, de matériels roulants et meubles.

Le manque à gagner en termes de chiffres d’affaires est estimé à 269,056 milliards FCFA dans les secteurs investigués : industries agroalimentaires, agro-industries locales, télécommunications, filière café – cacao, services agricoles et distribution. Près de 8 000 emplois relevant du secteur formel sont aujourd’hui menacés en plus des 6 434 emplois déjà perdus sur les sites en arrêt de production des agro-industries. A ce tableau noir, il importe de mentionner des pertes en vies humaines au rang des forces armées régulières, des enlèvements de civils contre rançons, la chute des exportations et des importations vers le Nigeria, une baisse d’activités qui n’est pas sans conséquences négatives sur les recettes douanières, ainsi que le phénomène de la prostitution qui a pris de l’ampleur dans les villes d’accueil des réfugiés internes. Des centaines de déplacés sans revenus étant désormais obligés de se livrer au commerce du s*e*xe.

DIALOGUE INCLUSIF

On peut donc comprendre les inquiétudes de Moussa Mahamat Faki, le président de la Commission de l’Union africaine qui, dans une interview accordée à l’hebdomadaire Jeune Afrique N° 3049 du 16 au 22 juin 2019, souhaite un retour à la vie normale au Nord-Ouest et au Sud- Ouest. Pour la personnalité tchadienne, «le tout n’est pas de parler; il faut agir. Je me suis rendu au Cameroun et j’ai échangé avec les autorités. Nous avons poussé le gouvernement à engager un dialogue, sachant que la décentralisation est prévue dans la constitution camerounaise et que cela devait permettre de satisfaire certaines revendications formulées localement ».

Certes des bases de dialogue ont été posées par le gouvernement, mais le chemin à parcourir est encore long pour parvenir à une résolution définitive du conflit. Début mai, le représentant spécial du secrétaire général de l’ONU pour l’Afrique centrale, a appelé à un dialogue inclusif au Cameroun pour dénouer la crise anglophone. L’appel a été émis lors d’une réunion du Conseil de sécurité consacrée à la situation en Afrique centrale. «Conduire un dialogue inclusif est le meilleur moyen de préserver la stabilité du pays, stabilité qui est vitale pour la sous-région. J’encourage les autorités camerounaises à poursuivre leurs efforts de dialogue et à faire avancer le processus de décentralisation », a déclaré Louncény Fall devant les membres du Conseil. Le Représentant spécial du secrétaire général de l’ONU pour l’Afrique centrale a noté avec satisfaction l’annonce du Premier ministre, Joseph Dion Ngute, le 9 mai, sur la prédisposition du président Paul Biya à s’engager dans un dialogue sur toutes les questions, sauf celles touchant à la sécession, afin de trouver une solution durable à la crise.

Au cours d’une visite qu’il a effectuée début mai à Bamenda, dans le Nord- Ouest, l’une des deux régions anglophones, le chef du gouvernement a déclaré que le pouvoir était prêt à initier un dialogue pour résoudre le conflit avec les séparatistes. «A part l’indivisibilité du Cameroun, le président de la République est prêt à organiser un dialogue formel pour résoudre la crise», a déclaré Joseph Dion Ngute. Le président Paul Biya «m’a demandé de dire que hormis la séparation et la sécession, tout autre chose peut être discutée», a-t-il ajouté. Il est temps de passer de la parole aux actes pour stopper la saignée tant humaine que financière.

[**https://www.237online.com/cameroun-crise-anglophone-le-dialogue-maintenant/**](https://www.237online.com/cameroun-crise-anglophone-le-dialogue-maintenant/)

1. **Cameroun/Crise anglophone : Le gouverneur lève le couvre-feu dans le Nord-ouest**

[**237online**](https://www.237online.com/author/237online/)17 juin 2019

 Temps de lecture 1 minute

[Pinterest](https://pinterest.com/pin/create/button/?url=https://www.237online.com/cameroun-crise-anglophone-le-gouverneur-leve-le-couvre-feu-dans-le-nord-ouest/&description=Cameroun%2FCrise%20anglophone%20%3A%20Le%20gouverneur%20l%C3%A8ve%20le%20couvre-feu%20dans%20le%20Nord-ouest&media=https://www.237online.com/wp-content/uploads/2019/05/Adolphe-Lele-Lafrique.jpg) [Reddit](https://reddit.com/submit?url=https://www.237online.com/cameroun-crise-anglophone-le-gouverneur-leve-le-couvre-feu-dans-le-nord-ouest/&title=Cameroun%2FCrise%20anglophone%20%3A%20Le%20gouverneur%20l%C3%A8ve%20le%20couvre-feu%20dans%20le%20Nord-ouest)

Le couvre-feu, instauré, depuis le 28 novembre 2018 dans la région anglophone camerounaise du Nord-ouest, en proie à un violent conflit sécessionniste, a été levé par un arrêté signé vendredi par le gouverneur, Adolphe Lele Lafrique.

Les restrictions qui allaient de 18h du soir à 6h du matin, concernaient les mouvements de personnes et de biens, de même que la mobilité des véhicules et engins à deux roues, à l’intérieur de la circonscription et en provenance des localités voisines.

En février et en novembre 2017, les populations du Nord-Ouest avaient déjà été soumises à de pareilles limitations de mouvements, suite à de multiples actes criminels attribués aux mouvements sécessionnistes.

La levée du couvre-feu par Adolphe Lele Lafrique intervient alors que la violence, loin de retomber sur le front de la crise sécessionniste, semble avoir pris la forme d’une guérilla à multiples facettes.

On déplore, notamment, des attaques à répétition des séparatistes contre des soldats et de multiples exactions que des ONG de défense des droits de l’homme attribuent aux forces de défense et de sécurité.

<https://www.237online.com/cameroun-crise-anglophone-le-gouverneur-leve-le-couvre-feu-dans-le-nord-ouest/>

1. **Cameroun: La crise anglophone au menu des échanges entre Marcel Niat Njifenji et le président du Sénat français**

[**237online**](https://www.237online.com/author/237online/)15 juin 2019

 2 minutes de lecture

[Pinterest](https://pinterest.com/pin/create/button/?url=https://www.237online.com/cameroun-la-crise-anglophone-au-menu-des-echanges-entre-marcel-niat-njifenji-et-le-president-du-senat-francais/&description=Cameroun%3A%20La%20crise%20anglophone%20au%20menu%20des%20%C3%A9changes%20entre%20Marcel%20Niat%20Njifenji%20et%20le%20pr%C3%A9sident%20du%20S%C3%A9nat%20fran%C3%A7ais&media=https://www.237online.com/wp-content/uploads/2019/06/Niat-au-Senat-francais.jpg) [Reddit](https://reddit.com/submit?url=https://www.237online.com/cameroun-la-crise-anglophone-au-menu-des-echanges-entre-marcel-niat-njifenji-et-le-president-du-senat-francais/&title=Cameroun%3A%20La%20crise%20anglophone%20au%20menu%20des%20%C3%A9changes%20entre%20Marcel%20Niat%20Njifenji%20et%20le%20pr%C3%A9sident%20du%20S%C3%A9nat%20fran%C3%A7ais)

« Comment vivre la décentralisation et en même temps dans l’unité d’un pays et sa diversité.

J’ai été frappé par les propos de sagesse du président du Sénat (camerounais, ndlr). Dans la diversité, il y a une capacité à trouver sagement les solutions du vivre ensemble et du partage » dixit Gérard Larcher, président de la chambre haute en France.

Michel Meva’a Meboutou, secrétaire général du Sénat, Emilia Nkeze, sénatrice SDf, Calvin Zang Oyono sénateur RDPC et Alfred Nguini, amabassadeur du Cameroun en France sont les membres de la délégation camerounaise que conduit depuis le 13 juin 2019 à Paris, Marcel Niat Nfenji à la 20e session des Senats d’Europe élargie aux Sénats d’Afrique. Les travaux qui s’achèvent ce samedi 15 juin, sont encadrés par les deux thèmes suivants : «*le dialogue euro-africain des deuxièmes chambres et le bicamérisme : un atout pour la démocratie*».

En marge des travaux, Gérard Larcher, le président du Sénat français a reçu hier en audience Marcel Niat Njifenji, le président du Sénat camerounais. Les deux personnalités ont échangé sur la situation sociopolitique très tendue au Cameroun, particulièrement la guerre de sécession au Nord-Ouest et au Sud-Ouest, les deux Régions anglophones du Cameroun.

Il n’y a pas eu un compte rendu d’audience ou un communiqué publié à la fin de cette rencontre. Mais, dans les différents journaux de la radio d’Etat, il a été indiqué que Marcel Niat Njifenji et son hôte ont échangé sur comment favoriser les échanges interparlementaires et renforcer la coopération en apportant une assistance aux Sénats africains. Gérard Larcher a particulièrement insisté pour que le Sénat français accompagne la chambre haute du Cameroun dans la mise en œuvre de son processus de décentralisation actuellement en cours. «*Comment vivre la décentralisation et en même temps dans l’unité d’un pays et sa diversité. J’ai été frappé par les propos de sagesse du président du Sénat (camerounais, ndlr). Dans la diversité, il y a une capacité à trouver sagement les solutions du vivre ensemble et du partage*» a déclaré Gerard Larcher. « *Nous sommes une démocratie qui se construit chaque jour. Ceux qui sont en train de vouloir mettre à feu le Cameroun, ceux-là se trompent, ils ne réussiront pas. Et le président (Paul Biya, ndlr) nous appelle à nous y opposer ferment*» a dit, d’une voix désincarnée, Marcel Niat Njifenji.

Ainsi, le parlement camerounais ne manque aucune occasion de fustiger ceux qu’il soupçonne d’alimenter les tensions sociopolitiques au Cameroun. « «*Il ne fait plus l’ombre d’un doute que le Cameroun est l’objet d’une conspiration qui vise sa déstabilisation. Pour justifier cette ingérence, les conspirateurs prétendent dénoncer le système politique camerounais qui serait d’après eux, réfractaire à tout dialogue…des allégations infondées. L’Assemblée nationale dénonce et condamne. L’accompagnement oui, ingérence non*» avait déclaré le lundi 10 juin, Cavaye Yeguie Djibril, le président de l’Assemblée nationale pendant le discours d’ouverture de la deuxième session ordinaire de l’année législative 2019.

<https://www.237online.com/cameroun-la-crise-anglophone-au-menu-des-echanges-entre-marcel-niat-njifenji-et-le-president-du-senat-francais/>

1. **Crise Anglophone: Paul Biya va-t-il organiser le dialogue inclusif annoncé?**

[**237online**](https://www.237online.com/author/237online/)15 juin 2019

 2 minutes de lecture

[Pinterest](https://pinterest.com/pin/create/button/?url=https://www.237online.com/crise-anglophone-paul-biya-va-t-il-organiser-le-dialogue-inclusif-annonce/&description=Crise%20Anglophone%3A%20Paul%20Biya%20va-t-il%20organiser%20le%20dialogue%20inclusif%20annonc%C3%A9%3F&media=https://www.237online.com/wp-content/uploads/2018/11/serment-sem-paul-biya.jpg) [Reddit](https://reddit.com/submit?url=https://www.237online.com/crise-anglophone-paul-biya-va-t-il-organiser-le-dialogue-inclusif-annonce/&title=Crise%20Anglophone%3A%20Paul%20Biya%20va-t-il%20organiser%20le%20dialogue%20inclusif%20annonc%C3%A9%3F)

Un mois après l’annonce à Bamenda par Joseph Dion Ngute, le Premier ministre, de la volonté du chef de l’Etat d’ouvrir un dialogue sur la crise qui secoue les régions anglophones du Nord Ouest et du Sud Ouest des d’observateurs estiment qu’on s’achemine vers une impasse.

Au cours de sa première visite le 10 mai 2019 dans la ville de Bamenda depuis sa nomination au poste de chef du gouvernement, le Premier ministre Joseph Dion Ngute a annoncé que le président de la République, Paul Biya était prêt à ouvrir un dialogue pour résoudre la crise qui sévit depuis trois ans dans les régions anglophones. Selon Dion Ngute, «Paul Biya était prêt à discuter de tout, sauf de la sécession».

Un mois après cette annonce, les prémices de ce dialogue sont toujours attendues. En réalité, de nombreux observateurs émettent depuis quelques temps des doutes sur l’organisation de cette grande concertation.

D’après le quotidien Le Jour dans son édition en kiosque ce 14 juin 2019, dans une tribune diffusée cette semaine, le journaliste Xavier Messe est péremptoire sur la question: «crise anglophone: le dialogue n’aura pas lieu». Pour lui, «le mot ‘’dialogue’’ est devenu un concept marketing revendiqué pour plaire, pour être à la mode. Mais au fond, personne n’y croit, personne n’en veut. Dans l’environnement actuel, si un dialogue inclusif et sans préalable devrait se tenir pour tenter de résoudre cette crise qui s’enlise et engendre d’autres problèmes, il devrait réunir dans une même salle: le gouvernement, l’opposition présente au Parlement, la société civile représentative, les fédéralistes, et les décentralistes. Il ne faudrait avoir peur de personne, il ne faudrait exclure personne », lit-on.

Pour Etienne Sonkin, trésorier national du SDF et ancien sénateur, «le président de la République n’est pas un homme de parole. Il ne fait pas ce qu’il dit. En plus, lorsque son Premier ministre parle et est contredit tel que nous l’avons vu, il se devait de préciser ses orientations. En 1990, la rue demandait la conférence nationale souveraine. Il s’y est opposé et a organisé la Tripartite, qui n’a produit aucun résultat (…). Ce n’est pas cette fois qu’on va véritablement dialoguer», soutient-il dans les colonnes du journal.

André Luther Meka, militant du RDPC dans un débat cette semaine sur Equinoxe Tv préfère relativiser. «Le dialogue n’est pas un événement mais un processus», a-t-il déclaré au cours de ce débat.

Alors que les uns attendent de savoir ce qui est fait, le Cameroun est entré dans la glose. «Les députés du SDF, qui sont retournés à l’hémicycle pour leur session de juin avec l’espoir qu’un débat parlementaire sera enfin ouvert, ont déchanté après le discours accusatif du président de l’Assemblée Nationale», souligne le journal. Et la sortie controversée du ministre de l’Administration territoriale, Paul Atanga Nji sur la chaîne France 24 «en rajoute au scepticisme des personnes averties, qui pensent à l’usure du temps ».

<https://www.237online.com/crise-anglophone-paul-biya-va-t-il-organiser-le-dialogue-inclusif-annonce/>

1. **Cameroun: Le SDF exige un gouvernement de transition pour résoudre la crise anglophone**

[**237online**](https://www.237online.com/author/237online/)12 juin 2019

 Temps de lecture 1 minute

[Pinterest](https://pinterest.com/pin/create/button/?url=https://www.237online.com/cameroun-le-sdf-exige-un-gouvernement-de-transition-pour-resoudre-la-crise-anglophone/&description=Cameroun%3A%20Le%20SDF%20exige%20un%20gouvernement%20de%20transition%20pour%20r%C3%A9soudre%20la%20crise%20anglophone&media=https://www.237online.com/wp-content/uploads/2018/10/sdf-challenge.jpg) [Reddit](https://reddit.com/submit?url=https://www.237online.com/cameroun-le-sdf-exige-un-gouvernement-de-transition-pour-resoudre-la-crise-anglophone/&title=Cameroun%3A%20Le%20SDF%20exige%20un%20gouvernement%20de%20transition%20pour%20r%C3%A9soudre%20la%20crise%20anglophone)

Le SDF tient le Président Paul Biya et ses collaborateurs pour responsables des conflits qui minent le Nord-Ouest et le Sud-Ouest. Il appelle de ce fait à la création d’un gouvernement par intérim pour juguler cette crise.

Le Président Paul Biya ne peut résoudre la crise anglophone. Il en est incapable! Cette position souvent défendue dans l’opinion publique est aussi celle du Social Democratic Front (SDF). Dans un communiqué daté du 09 juin, le parti de Ni John Fru Ndi soutient que «le régime de Paul Biya a clairement montré qu’il fait partie du problème pour lequel nous le tenons entièrement responsable».

Cette formation politique demande par conséquent «qu’un gouvernement de transition» soit mis en place pour mettre fin à «cette guerre civile qui détruit le socle de la nation».

Enlisé dans des affrontements entre séparatistes et militaires, le Cameroun subit une pression internationale de plus en plus forte menée principalement par les Etats-Unis d’Amérique. Cette super puissance accuse le gouvernement de ne pas prendre des mesures suffisantes pour une sortie de crise et d’aggraver les tensions politiques au Cameroun.

Le Social Democratic Front appelle la communauté internationale à amplifier la pression sur Yaoundé autour de la crise anglophone.

<https://www.237online.com/cameroun-le-sdf-exige-un-gouvernement-de-transition-pour-resoudre-la-crise-anglophone/>

1. **Crise anglophone: un nouveau rapport accablant pour le Cameroun**

[**237online**](https://www.237online.com/author/237online/)29 mai 2019

 2 minutes de lecture

[Pinterest](https://pinterest.com/pin/create/button/?url=https://www.237online.com/crise-anglophone-un-nouveau-rapport-accablant-pour-le-cameroun/&description=Crise%20anglophone%3A%20un%20nouveau%20rapport%20accablant%20pour%20le%20Cameroun&media=https://www.237online.com/wp-content/uploads/2018/11/separatistes-anglophones.jpg) [Reddit](https://reddit.com/submit?url=https://www.237online.com/crise-anglophone-un-nouveau-rapport-accablant-pour-le-cameroun/&title=Crise%20anglophone%3A%20un%20nouveau%20rapport%20accablant%20pour%20le%20Cameroun)

Dans un rapport publié ce 29 mai, l’organisme reproche à Yaoundé de minimiser le conflit dans les régions anglophones et d’entraver l’intervention des organisations humanitaires dans le Nord-Ouest et le Sud-Ouest.

Les chiffres contenus dans le rapport de Refugees International sont alarmants. «*1,3 million de personnes ayant besoin d’assistance humanitaire, 530 000 personnes déplacées au sein de la population anglophone au Nord-Ouest et au Sud-Ouest, environ 40 écoles détruites dans les régions anglophones, 42 500 enfants n’ont pas eu un accès continu à l’éducation au cours des trois dernières années*».

Des statistiques qui selon l’organisme humanitaire indépendant sont niées par le pouvoir en place. «*Les autorités camerounaises nient la gravité du déplacement et les besoins humanitaires. Pire, l’armée tout comme les séparatistes restreignent sévèrement la liberté de circulation, empêchant les populations locales d’accéder à leurs terres et à des services de base. Les deux (armée et séparatistes Ndlr) ont également pris des mesures visant à limiter l’accès des travailleurs humanitaires aux populations touchées par le conflit*.»

Le rapport intitulé «*Déni de crise: Le refus des dirigeants camerounais de reconnaître la crise fait peur aux donateurs» revient sur la guerre des chiffres entre le gouvernement et les Ong depuis le début de la crise «le ministre camerounais de l’Administration territoriale, Paul Atanga Nji, a déclaré que les Ong gonflaient les chiffres et faisaient la promotion de « fausses informations*». Le gouvernement prétend à tort qu’on enregistre seulement 152 000 déplacés dans le pays. L’Onu parle d’au moins 530 000 personnes».

L’Organisme accuse le régime de minimiser le nombre de personnes ayant besoin d’assistance humanitaire, d’entraver les missions des humanitaires et décourager les potentiels donateurs. Mais de vouloir imposer un plan d’assistance humanitaire «contraires aux principes humanitaires».

Une attitude constante selon Refugees International dont une équipe enquêtant sur la réponse humanitaire à la crise actuelle dans le Nord-Ouest et le Sud-Ouest en mars et avril 2019 s’est vu refouler par les autorités camerounaises.

L’Etat du Cameroun, tout comme les groupes séparatistes sont alors appelés à respecter les principes d droit international humanitaire. A ce propos, l’Organisme estime que le secrétaire général de l’Onu devrait «planifier une visite au Cameroun. Cette visite pourrait augmenter la visibilité globale de la crise, mobiliser le soutien des donateurs et faire pression sur le Président Biya pour garantir un accès humanitaire sans entrave».

<https://www.237online.com/crise-anglophone-un-nouveau-rapport-accablant-pour-le-cameroun/>

1. **Crise anglophone: ‘le président Biya est l’homme de la situation’**

[**237online**](https://www.237online.com/author/237online/)28 mai 2019

 Temps de lecture 1 minute

[Pinterest](https://pinterest.com/pin/create/button/?url=https://www.237online.com/crise-anglophone-le-president-biya-est-lhomme-de-la-situation/&description=Crise%20anglophone%3A%20%E2%80%98le%20pr%C3%A9sident%20Biya%20est%20l%E2%80%99homme%20de%20la%20situation%E2%80%99&media=https://www.237online.com/wp-content/uploads/2018/10/eric-chinje-2.jpg) [Reddit](https://reddit.com/submit?url=https://www.237online.com/crise-anglophone-le-president-biya-est-lhomme-de-la-situation/&title=Crise%20anglophone%3A%20%E2%80%98le%20pr%C3%A9sident%20Biya%20est%20l%E2%80%99homme%20de%20la%20situation%E2%80%99)

Eric Chinje était l’invité de la matinale de Radio Equinoxe le 27 mai 2019.

L’ancien rédacteur en chef de la première chaîne de télévision publique camerounaise a soutenu que le sentiment d’assimilation des ressortissants des régions du Nord-Ouest et du Sud-Ouest est à l’origine de la crise anglophone. Il rapporte que des anglophones se demandent s’ils appartiennent à cette République, mais clame qu’ « on ne peut pas accepter la sécession ». Il souligne cependant qu’il faut des actes pour montrer que le pays est uni et indivisible.

Eric Chinje se demande pourquoi « des gens qui ne faisaient que protester, qui n’ont rien cassé comme Mancho Bibixy sont maintenus en prison ».

L’ancien responsable de la Banque mondiale critique le déni des autorités camerounaises au sujet du problème anglophone. « Les anglophones n’ont toujours pas l’impression que le président a reconnu ce problème. Il y a un acte que seul le chef de l’Etat qui est le chef de la famille doit poser. L’Assemblée nationale n’a jamais débattu de ce problème pourquoi ? L’Assemblée nationale, la maison du peuple, le Sénat éagissent seulement quand le Parlement européen pose des questions ». Ce qui pour lui n’est « pas normal ».

Pourtant croit-il, « il n’y a que le chef de l’Etat qui est en mesure aujourd’hui de résoudre ce problème ». Chinje pense que ceux qui disent qu’il trouvera solution avec le départ de Paul Biya sont dans l’erreur. « C’est faux », lâche-t-il, rappelant que « le président Biya est l’homme de la situation ».

Pour le reste, il juge les mesures prises par le gouvernement dans l’intention de juguler la crise insuffisantes. Au sujet des avis de la communauté internationale sur la situation dans son pays, Eric Chinje dénonce l’attitude du pouvoir : « on fait appel à cette communauté internationale pour nous aider dans presque tous les aspects de la vie nationale puis quand il s’agit d’une crise de cette nature on commence à exiger l’exclusion de cette communauté internationale ce n’est pas normal. Et puis qu’est-ce que cette communauté a dit d’anormal si ce n’est d’appeler au dialogue? », se demande-t-il.

<https://www.237online.com/crise-anglophone-le-president-biya-est-lhomme-de-la-situation/>

1. **Crise anglophone : plus de 200 villages brûlés dans le Nord-ouest et le Sud-ouest**

[**237online**](https://www.237online.com/author/237online/)24 mai 2019

 Temps de lecture 1 minute

[Pinterest](https://pinterest.com/pin/create/button/?url=https://www.237online.com/crise-anglophone-plus-de-200-villages-brules-dans-le-nord-ouest-et-le-sud-ouest/&description=Crise%20anglophone%20%3A%20plus%20de%20200%20villages%20br%C3%BBl%C3%A9s%20dans%20le%20Nord-ouest%20et%20le%20Sud-ouest&media=https://www.237online.com/wp-content/uploads/2019/05/villages-brules.jpg) [Reddit](https://reddit.com/submit?url=https://www.237online.com/crise-anglophone-plus-de-200-villages-brules-dans-le-nord-ouest-et-le-sud-ouest/&title=Crise%20anglophone%20%3A%20plus%20de%20200%20villages%20br%C3%BBl%C3%A9s%20dans%20le%20Nord-ouest%20et%20le%20Sud-ouest)

Le décompte est fait par le Centre for Human Rights and Democracy in Africa dans un récent rapport.

Entre 2017 et 2019, 206 villages ont été brûlés dans les régions du Nord-ouest et du Sud-ouest du Cameroun. C’est ce que rapporte le Centre for Human Rights and Democracy in Africa (CHRDA), dans un rapport récemment rendu public.

Dans ce décompte, l’Ong rapporte que dans la région du Nord-ouest, 107 villages ont été réduits en cendres, pour 99 villages dans la région du Sud-ouest.

Dans ces chiffres, l’on note que 134 villages ont été « sévèrement affectés », autrement dit une destruction complète du village. 57 villages ont été partiellement affectés avec incendie de maison et destruction de bien ; et 15 ont connu des dommages encore moindres.

Depuis 2017, les régions anglophones se sont soulevées contre le pouvoir central dans ce qui s’est transformé en guerre civile entre militaires et indépendantistes armés. L’armée est régulièrement accusée de pratiquer la tactique de la terre brulée en incendiant des villages soupçonnés d’abriter des hommes armés. Le conflit a déjà fait près de 2000 morts.

<https://www.237online.com/crise-anglophone-plus-de-200-villages-brules-dans-le-nord-ouest-et-le-sud-ouest/>

1. **Cameroun – Crise anglophone/S.E Pietro Lazzeri (ambassadeur de Suisse): «Aux problèmes camerounais, il y a des solutions camerounaises»**

[**237online**](https://www.237online.com/author/237online/)23 mai 2019

 Temps de lecture 1 minute

[Pinterest](https://pinterest.com/pin/create/button/?url=https://www.237online.com/cameroun-crise-anglophone-s-e-pietro-lazzeri-ambassadeur-de-suisse-aux-problemes-camerounais-il-y-a-des-solutions-camerounaises/&description=Cameroun%20%E2%80%93%20Crise%20anglophone%2FS.E%20Pietro%20Lazzeri%20%28ambassadeur%20de%20Suisse%29%3A%20%C2%ABAux%20probl%C3%A8mes%20camerounais%2C%20il%20y%20a%20des%20solutions%20camerounaises%C2%BB&media=https://www.237online.com/wp-content/uploads/2019/05/Paul_Biya_et_S_E_Pietro_Lazzeri.jpg) [Reddit](https://reddit.com/submit?url=https://www.237online.com/cameroun-crise-anglophone-s-e-pietro-lazzeri-ambassadeur-de-suisse-aux-problemes-camerounais-il-y-a-des-solutions-camerounaises/&title=Cameroun%20%E2%80%93%20Crise%20anglophone%2FS.E%20Pietro%20Lazzeri%20%28ambassadeur%20de%20Suisse%29%3A%20%C2%ABAux%20probl%C3%A8mes%20camerounais%2C%20il%20y%20a%20des%20solutions%20camerounaises%C2%BB)

 Paul Biya et S.E Pietro Lazzeri, Palais de l'Unité le 22-05-2019.

Reçu en audience par Paul Biya le 22 mai 2019, le diplomate suisse a rassuré du soutien de son pays dans la recherche des solutions à la crise anglophone.

Yaoundé peut compter sur le soutien de Genève! La Suisse veut accompagner le Cameroun dans la recherche des solutions internes à la crise qui secoue les régions du Nord-Ouest et du Sud-Ouest anglophones de notre pays. Une crise qui a déjà fait près de 2000 morts et au moins 530 000 déplacés internes, selon les dernières données fournies par International Crisis Group.

Reçu en audience au Palais de l’Unité le 22 mai 2019 par le Président Paul Biya, l’ambassadeur de la Confédération Suisse au Cameroun a réitéré la disponibilité de son pays à accompagner le nôtre dans la recherche des issues pacifiques à cette crise qui, de l’avis de plusieurs ONG, s’est muée en conflit armé entre combattants séparatistes et forces gouvernementales depuis 20 mois.

«*Nous avons eu un échange sur la situation au Nord-Ouest et au Sud-Ouest. La Suisse contribue, à travers son expertise, à la recherche des solutions à cette situation. Comme on fait en Suisse, avec détermination, mais avec modestie, on dit toujours qu’aux problèmes camerounais, il y a des solutions camerounaises*», a déclaré S.E Pietro Lazzeri au sortir de l’audience.

«*La Suisse essaye d’accompagner le Cameroun, les parties dans la recherche des solutions*», a ajouté le diplomate suisse. Une position qui rejoint celles de la Russie et de la Chine, opposées à l’idée d’une intervention de la communauté internationale au Cameroun.

L’ambassadeur Suisse était, pour la circonstance, en compagnie de l’industriel Antoine Saint-Affrique, président du groupe agro-alimentaire Barry Callebaut, propriétaire de la Société Industrielle des Cacaos (SIC Cacaos) à Douala, spécialisée dans le broyage des fèves de cacao.

Pour ce volet de l’audience, les échanges ont porté sur l’emploi et la formation des jeunes dans l’agro-industrie. «*Le groupe fait des affaires, mais il contribue aussi au développement du pays, il investit dans la formation des collaborateurs et collaboratrices et notamment il va continuer à former des jeunes*», a souligné M. Lazzeri.

<https://www.237online.com/cameroun-crise-anglophone-s-e-pietro-lazzeri-ambassadeur-de-suisse-aux-problemes-camerounais-il-y-a-des-solutions-camerounaises/>

1. **Cameroun – Crise Anglophone: HRW exige une enquête indépendante et prompte sur plus de 70 maisons incendiées par l’armée**

[**237online**](https://www.237online.com/author/237online/)23 mai 2019

 2 minutes de lecture

[Pinterest](https://pinterest.com/pin/create/button/?url=https://www.237online.com/cameroun-crise-anglophone-hrw-exige-une-enquete-independante-et-prompte-sur-plus-de-70-maisons-incendiees-par-larmee/&description=Cameroun%20%E2%80%93%20Crise%20Anglophone%3A%20HRW%20exige%20une%20enqu%C3%AAte%20ind%C3%A9pendante%20et%20prompte%20sur%20plus%20de%2070%20maisons%20incendi%C3%A9es%20par%20l%E2%80%99arm%C3%A9e&media=https://www.237online.com/wp-content/uploads/2018/10/feu-maison.jpg) [Reddit](https://reddit.com/submit?url=https://www.237online.com/cameroun-crise-anglophone-hrw-exige-une-enquete-independante-et-prompte-sur-plus-de-70-maisons-incendiees-par-larmee/&title=Cameroun%20%E2%80%93%20Crise%20Anglophone%3A%20HRW%20exige%20une%20enqu%C3%AAte%20ind%C3%A9pendante%20et%20prompte%20sur%20plus%20de%2070%20maisons%20incendi%C3%A9es%20par%20l%E2%80%99arm%C3%A9e)

D’après l’organisation, l’attaque du 15 mai 2019 a été coordonnée par des militaires de l’Armée de l’air et du Bataillon d’Intervention Rapide (BIR).

« *Des militaires camerounais ont semé la terreur dans la région anglophone du Nord-Ouest le 15 mai 2019, incendiant plus de 70 habitations à Mankon, dans l’agglomération de Bamenda*», a souligné Human Rights Watch (HRW) dans un rapport publié jeudi 23 mai 2019.

« *Des militaires ont notamment traîné de force un homme hors de chez lui avant de l’abattre dans la rue* », poursuit l’organisation qui se donne pour mission de défendre les droits de l’homme et le respect de la Déclaration universelle des droits de l’homme.

Sur ces violations commises à Mankon dans la région du Nord-Ouest, HRW voudrait qu’une enquête soit menée «*promptement et de manière indépendante et impartiale, mais elle ne devrait pas s’arrêter là. Le gouvernement devrait immédiatement examiner les autres incidents lors desquels ses forces de sécurité sont accusées d’avoir commis des abus et en poursuivre les responsables en justice.* »

Des témoins qui se sont entretenus avec les observateurs de HRW, ont décrit comment « *des militaires de l’Armée de l’air et du Bataillon d’Intervention Rapide (BIR) avaient coordonné l’attaque*» qui s’est soldée par les incendies de maisons et les destructions de biens à Mankon.

L’Organisation Non-Gouvernementale rapporte aussi qu’elle a également examiné « des images satellite qui montrent plus de 70 bâtiments touchés par l’incendie, ainsi que des photos et des vidéos montrant des destructions importantes de biens » le 15 mai dernier.

Dans un communiqué du 16 mai 2019, le ministre de la Défense, Joseph Beti Assomo, avait expliqué qu’après l’assassinat de deux soldats en patrouille à Alachu, Mankon, par des combattants séparatistes, l’armée avait lancé un ratissage dans la zone.

« *Cela a entraîné des tirs et dans l’atmosphère confuse, des maisons ont été incendiées et des propriétés détruites*», lisait le communiqué.

Le ministre de la Défense a alors annoncé que des enquêtes sont ouvertes pour déterminer les personnes qui avaient détruit les maisons. Joseph Beti Assomo a également promis des indemnisations la population touchée.

« *La décision du gouvernement d’ouvrir une enquête sur ces attaques contre des civils et contre leurs biens est un pas important vers l’établissement des responsabilités* », a déclaré Lewis Mudge, directeur pour l’Afrique Centrale à Human Rights Watch.

« *Les autorités camerounaises devraient faire en sorte que l’enquête sur cette attaque soit indépendante et transparente et faire rendre des comptes à ses responsables. Et il devrait autoriser l’entrée dans le pays d’observateurs indépendants.*»

Pour rappel, le Gouvernement a refusé à une chercheuse de Human Rights Watch l’autorisation d’entrer au pays le 12 avril 2019, deux jours après la publication par HRW d’un rapport sur une attaque meurtrière menée par l’armée contre un village dans la région du Nord-Ouest.

<https://www.237online.com/cameroun-crise-anglophone-hrw-exige-une-enquete-independante-et-prompte-sur-plus-de-70-maisons-incendiees-par-larmee/>

1. **Crise anglophone: Macron suggère la décentralisation comme solution**

[**237online**](https://www.237online.com/author/237online/)21 mai 2019

 Temps de lecture 1 minute

[Pinterest](https://pinterest.com/pin/create/button/?url=https://www.237online.com/crise-anglophone-macron-suggere-la-decentralisation-comme-solution/&description=Crise%20anglophone%3A%20Macron%20sugg%C3%A8re%20la%20d%C3%A9centralisation%20comme%20solution&media=https://www.237online.com/wp-content/uploads/2018/10/macron-biya-paul.jpg)

Une tradition respectée! Comme il est de coutume, le Président de la République de France a écrit à son homologue camerounais à l’occasion de la célébration de la 47ème édition de la fête nationale de l’Unité, le 20 mai 2019. Un évènement qui s’est célébré cette année dans un contexte marqué par l’aggravation de la crise dans les régions du Nord-Ouest et du Sud-Ouest.

Après avoir présenté ses «vœux de bonheur et de prospérité» à Paul Biya ainsi qu’au peuple camerounais, Emmanuel Macron rassure son interlocuteur d’œuvrer au renforcement de la relation «ancienne d’amitié et de confiance» qui lie le Cameroun et la France.

«Je saisis cette occasion pour vous exprimer la solidarité et le soutien de la France dans la lutte que votre pays mène, aux côtés des pays membres de la Force Multinationale Mixte, contre le groupe terroriste Boko Haram», écrit le numéro français.

Emmanuel Macron se dit enfin préoccupé par la crise anglophone qui a déjà fait, selon le dernier rapport de International Crisis Group, 1850 morts, plus de 530 000 déplacés internes et plusieurs dizaines de milliers de déplacés externes.

«Vous savez la préoccupation que m’inspire la crise dans les régions du Nord-Ouest et du Sud-Ouest du Cameroun. Comme je vous l’ai dit en février dernier, je suis convaincu de la nécessité d’y apporter de manière urgente une réponse politique par le recours au dialogue, des mesures de détente et une accélération de la décentralisation. La France est naturellement prête à soutenir toutes les initiatives que vous pourriez prendre dans ce sens», indique le locataire de l’Elysée.

<https://www.237online.com/crise-anglophone-macron-suggere-la-decentralisation-comme-solution/>

1. **Cameroun – Dialogue dans la crise anglophone: Atanga Nji contredit le Premier Ministre Dion Ngute**

[**237online**](https://www.237online.com/author/237online/)20 mai 2019

 Temps de lecture 1 minute

[Pinterest](https://pinterest.com/pin/create/button/?url=https://www.237online.com/cameroun-dialogue-dans-la-crise-anglophone-atanga-nji-contredit-le-premier-ministre-dion-ngute/&description=Cameroun%20%E2%80%93%20Dialogue%20dans%20la%20crise%20anglophone%3A%20Atanga%20Nji%20contredit%20le%20Premier%20Ministre%20Dion%20Ngute&media=https://www.237online.com/wp-content/uploads/2019/05/Atanga-Nji-conference.jpg) [Reddit](https://reddit.com/submit?url=https://www.237online.com/cameroun-dialogue-dans-la-crise-anglophone-atanga-nji-contredit-le-premier-ministre-dion-ngute/&title=Cameroun%20%E2%80%93%20Dialogue%20dans%20la%20crise%20anglophone%3A%20Atanga%20Nji%20contredit%20le%20Premier%20Ministre%20Dion%20Ngute)

Alors que le Premier Ministre parle d’un dialogue ouvert à tous les sujets, sauf la sécession, le ministre de l’Administration Territoriale affirme que la forme de l’Etat est non négociable.

Au sujet du dialogue dans la crise anglophone, c’est la cacophonie dans la communication gouvernementale. En visite dans les régions du Nord-Ouest et du Sud-Ouest ces deux dernières semaines, le Premier Ministre a révélé la disponibilité du Président de la République à discuter avec les séparatistes de tous les sujets, exception faite de la sécession, a précisé Chief Dr Joseph Dion Ngute.

Traduction, le pouvoir de Yaoundé est désormais prêt à mettre le sujet du fédéralisme sur la table des discussions. Pourtant, revenant sur cette visite, le ministre de l’Administration Territoriale (MINAT) a fait des déclarations en totale contradiction avec celles de son Premier Ministre. «Le Chef de l’Etat est prêt à discuter de tout sauf de la forme de l’Etat», a dit Paul Atanga Nji sur les antennes de la CRTV radio et la chaîne de télévision France 24. En d’autres termes, il n’y aura pas de dialogue autour du fédéralisme.

Cette sortie du MINAT semble gêner ses collègues du gouvernement. «Les propos d’Atanga Nji sont antérieurs au propos du Premier Ministre», a tenté d’expliqué Grégoire Owona sur les antennes de Canal 2 International le 19 mai. «Le Chef du Gouvernement a délivré des messages forts envoyés par de Chef de l’Etat, c’est ce message qu’il faut retenir», a expliqué le ministre du Travail et de la Sécurité Sociale.

Même son de cloche chez le ministre de la Communication (MINCOM), porte-parole du gouvernement. Sur les antennes d’Equinoxe télévision, le directeur de l’Observatoire des médias au MINCOM, qui représentait le ministre René Sadi, a indiqué que le MINAT avait donné une position personnelle. «Paul Biya est pour le dialogue inclusif. Le ministre donne une position qui est sa position. Ma position est celle du 1er ministre chef du gouvernement», a déclaré Charles Atangana Manda.

<https://www.237online.com/cameroun-dialogue-dans-la-crise-anglophone-atanga-nji-contredit-le-premier-ministre-dion-ngute/>

1. **Crise anglophone: le gouvernement confirme que des militaires ont brûlé des maisons suite à une « confusion »**

[**237online**](https://www.237online.com/author/237online/)19 mai 2019

 Temps de lecture 1 minute

[Pinterest](https://pinterest.com/pin/create/button/?url=https://www.237online.com/crise-anglophone-le-gouvernement-confirme-que-des-militaires-ont-brule-des-maisons-suite-a-une-confusion/&description=Crise%20anglophone%3A%20le%20gouvernement%20confirme%20que%20des%20militaires%20ont%20br%C3%BBl%C3%A9%20des%20maisons%20suite%20%C3%A0%20une%20%C2%AB%20confusion%20%C2%BB&media=https://www.237online.com/wp-content/uploads/2018/11/marche-brule-feu.jpg) [Reddit](https://reddit.com/submit?url=https://www.237online.com/crise-anglophone-le-gouvernement-confirme-que-des-militaires-ont-brule-des-maisons-suite-a-une-confusion/&title=Crise%20anglophone%3A%20le%20gouvernement%20confirme%20que%20des%20militaires%20ont%20br%C3%BBl%C3%A9%20des%20maisons%20suite%20%C3%A0%20une%20%C2%AB%20confusion%20%C2%BB)

Le ministre de la Défense a réagi le 15 mai à l’attaque un petit village dans le département de Bafut, région du Nord-ouest du Cameroun.

Joseph Beti Assomo, rapporte que, « *dans la mi-journée du mercredi 15 mai, deux soldats roulant à motocyclette dans la ville de Bamenda, ont été sauvagement et lâchement assassinés pas des terroristes embusqués dans des habitations lieu-dit Alachu/Bafut*».

En guise de représailles, les militaires lancés à la poursuite des séparatistes, « *ont été pris à partie par de nombreuses personnes non identifiées et violentes* », ajoute le communique qui explique que « *la confusion a provoqué des échauffourées avec destructions des biens et incendies de quelques maisons*»

L’équipe d’intervention allait boucler et ratisser la zone.

Le ministre de la Défense informe qu’une enquête a été ouverte pour faire la lumière et déterminer les auteurs des destructions de biens.

<https://www.237online.com/crise-anglophone-le-gouvernement-confirme-que-des-militaires-ont-brule-des-maisons-suite-a-une-confusion/>

1. **Crise anglophone : témoignages des ex-combattants sécessionnistes**

[**237online**](https://www.237online.com/author/237online/)18 mai 2019

 2 minutes de lecture

[Pinterest](https://pinterest.com/pin/create/button/?url=https://www.237online.com/crise-anglophone-temoignages-des-ex-combattants-secessionnistes/&description=Crise%20anglophone%20%3A%20t%C3%A9moignages%20des%20ex-combattants%20s%C3%A9cessionnistes&media=https://www.237online.com/wp-content/uploads/2019/05/conflit-ambazonie-bamenda.jpg) [Reddit](https://reddit.com/submit?url=https://www.237online.com/crise-anglophone-temoignages-des-ex-combattants-secessionnistes/&title=Crise%20anglophone%20%3A%20t%C3%A9moignages%20des%20ex-combattants%20s%C3%A9cessionnistes)

BBC Afrique a rencontré certains des ex-combattants sécessionnistes, qui vivent au centre DDR de Bamenda, la ville chef-lieu de la région du Nord-Ouest.

A ce jour, 35 ex-combattants, hommes et femmes, vivent dans le centre de désarmement, démobilisation et réinsertion de Bamenda. Ces jeunes, dont l’âge varie entre 14 et 25 ans, ont combattu dans les rangs des Ambas, le nom donné aux séparatistes armés . Outre la lutte pour la création d’un Etat indépendant, Nkeng Florence, une ex-combattante, mère de deux enfants, dit avoir pris les armes contre son pays, après l’incendie de sa boutique.

"Je combattais parce que l'armée a incendié ma boutique. J'avais un salon de coiffure et je vendais du prêt-à-porter. J'étais fâchée, et j'ai suivi mes amis en brousse", raconte Nkeng Florence.

Apres plus d’un an de combats aux côtés des séparatistes, Lukong Clinton explique pourquoi il n’a plus envie de reprendre les armes.

« *J’étais en brousse, à Kumbo, avec les combattants, pendant un an et demi. On croyait à notre lutte. Mais plus tard, j’ai constaté qu’on se battait pour autre chose. Les choses avaient changé, il y avait des meurtres, des incendies et des vols, ce qui n’était pas notre but*« , se souvient Lukong Clinton.

Créé en novembre 2018 par un décret présidentiel, le CNDDR a pour vocation d’accueillir et de désarmer les ex-combattants de Boko Haram et des groupes armés des régions anglophones du Nord-Ouest et du Sud-Ouest du Cameroun.

Le centre est également chargé de « collecter » les armes des combattants démobilisés et de les aider à réintégrer la vie civile.

A ce jour, 166 combattants, dont 57 en zone anglophone, ont déposé les armes.

Selon Dr Nick Ngwayang, fondateur du Mouvement paix dans les régions anglophones, peu de personnes déposent les armes à cause de la démarche du gouvernement.

"La meilleure façon de résoudre ce conflit, c'est d'utiliser le dialogue avant de demander que les armes soient déposées. Mais parce qu'on a commencé par demander le dépôt des armes, ça traîne de cette façon (…). L'essentiel pour nous est de faire ce qu'il y a à faire pour arriver à la paix", explique M. Ngwayang.

Selon Fai Yengo Francis, le coordonnateur national du CNDDR, la sensibilisation va se poursuivre, afin d’emmener le plus grand nombre de combattants à déposer les armes.

En visite à Bamenda, la semaine dernière, le Premier ministre camerounais, Joseph Dion Ngute, a réitéré l’engagement du président Paul Biya à mettre fin à la crise anglophone.

L’Etat ne va pas faire arrêter les présumés sécessionnistes qui accepteront volontairement de se rendre, selon le chef du gouvernement.

<https://www.237online.com/crise-anglophone-temoignages-des-ex-combattants-secessionnistes/>

1. **Cameroun – Crise Anglophone: Ces personnalités qui ont tenu des propos offensants**

[**237online**](https://www.237online.com/author/237online/)17 mai 2019

 2 minutes de lecture

[Pinterest](https://pinterest.com/pin/create/button/?url=https://www.237online.com/cameroun-crise-anglophone-ces-personnalites-qui-ont-tenu-des-propos-offensants/&description=Cameroun%20%E2%80%93%20Crise%20Anglophone%3A%20Ces%20personnalit%C3%A9s%20qui%20ont%20tenu%20des%20propos%20offensants&media=https://www.237online.com/wp-content/uploads/2019/05/Engelbert-Essomba-Bengono.jpg) [Reddit](https://reddit.com/submit?url=https://www.237online.com/cameroun-crise-anglophone-ces-personnalites-qui-ont-tenu-des-propos-offensants/&title=Cameroun%20%E2%80%93%20Crise%20Anglophone%3A%20Ces%20personnalit%C3%A9s%20qui%20ont%20tenu%20des%20propos%20offensants)

Depuis la radicalisation du conflit armé dans les régions du Nord-Ouest et du Sud-Ouest du pays, plusieurs écarts de langage ont été enregistrés.
Malgré les nombreux tweets du président de la République, Paul Biya appelant au pardon, certaines personnalités semblent ne pas être intéressées par cet appel du chef de l’Etat.

La dernière personnalité en date est l’honorable Engelbert Essomba Bengono, du Rassemblement Démocratique du Peuple Camerounais qui a «glissé sur le terrain», peut-on lire dans les colonnes du quotidien Le Jour édition du 17 mai 2019.

En effet, le député suppléant a eu une sortie malheureuse au cours de l’émission «Equinoxe soir», diffusée sur la chaine de télévision privée Equinoxe Tv, le 13 mai dernier. «Le parlementaire n’a pas eu besoin d’enfiler des gangs pour faire voir son insensibilité face aux nombreux morts de cette fâcheuse crise en cours dans les régions du Nord-Ouest et du Sud-Ouest», relève le journal.

«Est-ce que vous savez le nombre de fois où Dieu le créateur, a dû raser l’espèce humaine pour se constituer un peuple? Il dit: je rase Sodome et Gomorrhe et il rase. Nous ne comptons pas les morts, vous comprenez? Nous comptons les camerounais actifs tous les jours», avait-il déclaré. Cette sortie grave a été qualifiée de «déclaration génocidaire», par Me Akere Muna.

Le député suppléant n’est pas le premier à tenir des propos controversés liés à cette crise qui sévit dans les régions du Nord-Ouest et du Sud-Ouest. «A l’orée de ces évènements malheureux, le journaliste Jean Jacques Zé avait essuyé une foule de critiques en janvier 2017. Dans une chronique y afférente, il avait irrité de nombreuses personnes en disant: «la dératisation qui est en marche aujourd’hui n’a pas encore fini de dévoiler tous les secrets de cette affaire», rappelle Le Jour.

Notre confrère cite également le gouverneur de la région du Sud-Ouest, Bernard Okalia Bilaï qui avait traité certains anglophones de «chiens».

Si le député suppléant, Essomba Bengono et le journaliste Jean Jacques Zé ont présenté leurs excuses, dans une lettre ouverte adressée au président de l’Assemblée Nationale, l’honorable Cavaye Yeguié Djibril, Me Akere Muna «ne cache pas son courroux et espère voir une réaction rapide comme ce fut le cas lors de la sortie du parlement européen» au sujet des propos tenus par le membre du RDPC.

<https://www.237online.com/cameroun-crise-anglophone-ces-personnalites-qui-ont-tenu-des-propos-offensants/>

1. **Crise anglophone : Cabral Libii propose ses services comme médiateur au côté NI John Fru Ndi**

[**237online**](https://www.237online.com/author/237online/)17 mai 2019

 Temps de lecture 1 minute

[Pinterest](https://pinterest.com/pin/create/button/?url=https://www.237online.com/crise-anglophone-cabral-libii-propose-ses-services-comme-mediateur-au-cote-ni-john-fru-ndi/&description=Crise%20anglophone%20%3A%20Cabral%20Libii%20propose%20ses%20services%20comme%20m%C3%A9diateur%20au%20c%C3%B4t%C3%A9%20NI%20John%20Fru%20Ndi&media=https://www.237online.com/wp-content/uploads/2019/04/cabral-birois.jpg) [Reddit](https://reddit.com/submit?url=https://www.237online.com/crise-anglophone-cabral-libii-propose-ses-services-comme-mediateur-au-cote-ni-john-fru-ndi/&title=Crise%20anglophone%20%3A%20Cabral%20Libii%20propose%20ses%20services%20comme%20m%C3%A9diateur%20au%20c%C3%B4t%C3%A9%20NI%20John%20Fru%20Ndi)

Le nouveau président national du Parti Camerounais pour la Réconciliation Nationale (PCRN) a fait cette proposition au cours de l’émission Entretien Avec de ce jeudi 16 mai 2019, présenté par Dipita Tongo.

Lors de la visite du Premier Ministre, Chef du gouvernement à Bamenda pour annoncer le Dialogue prochain pour une sortie de crise dans les deux régions, anglophones, le Chairman du SDF s’est proposé d’être médiateur dans le cadre du dialogue. Quelques jours après, Cabral Libii se propose également comme médiateur au côté du Président national du SDF. « Je me propose aussi comme médiateur au côté de Ni John Fru Ndi pour régler cette crise…les séparatistes doivent déposer leurs armes et les soldats doivent retourner dans les casernes, l’État de son côté doit donc créer les conditions du dialogue », a déclaré le troisième à la dernière élection présidentielle de 2018 au Cameroun.

Au cours de l’émission Cabral Libii souligne qu’il reste jusqu’à présent le Coordonnateur national du mouvement onze millions de citoyens. Selon lui, « *OMC est un mouvement apolitique qui accompagne les populations à s’inscrire sur les listes électorales et aide les jeunes à être des candidats pour les élections municipales et législatives peu importe la bannière politique* ».

Le samedi 11 mai 2019, Monsieur Cabral LIBII LI NGUE, coordonnateur général du mouvement associatif Onze Millions de Citoyens et classé au troisième rang à l’élection présidentielle du 07 octobre 2018, a été élu au cours d’un congrès dûment déclaré auprès de la Sous-préfecture de GUIDIGUIS, département du MAYO-KANI dans la région de l’Extrême-Nord, président national du PARTI CAMEROUNAIS POUR LA RECONCILIATION NATIONALE (P.C.R .N) en abrégé usuel : « LE PACA ».

<https://www.237online.com/crise-anglophone-cabral-libii-propose-ses-services-comme-mediateur-au-cote-ni-john-fru-ndi/>

1. **Cameroun – Crise anglophone: La mort de deux soldats provoque des échauffourées à Bamenda**

[**237online**](https://www.237online.com/author/237online/)17 mai 2019

 Temps de lecture 1 minute

[Pinterest](https://pinterest.com/pin/create/button/?url=https://www.237online.com/cameroun-crise-anglophone-la-mort-de-deux-soldats-provoque-des-echauffourees-a-bamenda/&description=Cameroun%20%E2%80%93%20Crise%20anglophone%3A%20La%20mort%20de%20deux%20soldats%20provoque%20des%20%C3%A9chauffour%C3%A9es%20%C3%A0%20Bamenda&media=https://www.237online.com/wp-content/uploads/2019/05/echauffourees-Bamenda.jpg) [Reddit](https://reddit.com/submit?url=https://www.237online.com/cameroun-crise-anglophone-la-mort-de-deux-soldats-provoque-des-echauffourees-a-bamenda/&title=Cameroun%20%E2%80%93%20Crise%20anglophone%3A%20La%20mort%20de%20deux%20soldats%20provoque%20des%20%C3%A9chauffour%C3%A9es%20%C3%A0%20Bamenda)

Le ministre de la Défense informe que les militaires ont été pris au piège par des séparatistes au lieu-dit Alachu/Bafut, dans la capitale régionale du Nord-Ouest.

Des pertes dans les rangs de l’armée camerounaise. Dans un communiqué publié le 16 mai 2019, le ministre de la Défense (MINDEF) indique que «*dans la mi-journée du mercredi 15 mai 2019, deux soldats roulant à motocyclette dans la ville de Bamenda, ont été sauvagement et lâchement assassinés par des terroristes sécessionnistes, embusqués dans les habitations au lieu-dit Alachu/Bafut*».

Sans donner d’informations sur les identités des militaires tués, Joseph Beti Assomo renseigne que «la descente immédiate d’une équipe d’intervention avec pour mission de boucler et ratisser la zone, s’est soldée par un échange de de coups de feu avec les terroristes qui ont tenté de prendre la fuite». C’est à ce moment qu’un incident s’est produit.

«*Les militaires lancés à leur poursuite ont été pris à partie par de nombreuses personnes non identifiées et violentes. La confusion a provoqué des échauffourées avec destructions des biens et incendie de quelques maisons*», informe le MINDEF. «*Une enquête a été ouverte pour faire toute la lumière sur cette affaire et déterminer les auteurs des destructions de biens ayant provoqué un réel préjudice à leurs propriétaires. Les coupables identifiés répondront de leurs actes conformément à la loi*», promet-il.

Ces incidents interviennent une semaine après le passage du Premier Ministre dans la capitale régionale du Nord-Ouest. Joseph Dion Ngute qui a passé le message de paix du Président de la République, désormais disposé à dialoguer avec les séparatistes de tous les sujets, à l’exception de la sécession. La preuve donc que le chemin de sortie de crise est encore long.

<https://www.237online.com/cameroun-crise-anglophone-la-mort-de-deux-soldats-provoque-des-echauffourees-a-bamenda/>

1. **Crise anglophone/Tibor Nagy devant le Congrès: «Le gouvernement camerounais n’a rien fait pour résoudre le conflit…»**

[**237online**](https://www.237online.com/author/237online/)16 mai 2019

 Temps de lecture 1 minute

[Pinterest](https://pinterest.com/pin/create/button/?url=https://www.237online.com/crise-anglophone-tibor-nagy-devant-le-congres-le-gouvernement-camerounais-na-rien-fait-pour-resoudre-le-conflit/&description=Crise%20anglophone%2FTibor%20Nagy%20devant%20le%20Congr%C3%A8s%3A%20%C2%ABLe%20gouvernement%20camerounais%20n%E2%80%99a%20rien%20fait%20pour%20r%C3%A9soudre%20le%20conflit%E2%80%A6%C2%BB&media=https://www.237online.com/wp-content/uploads/2019/05/Tibor-Nagy.jpg) [Reddit](https://reddit.com/submit?url=https://www.237online.com/crise-anglophone-tibor-nagy-devant-le-congres-le-gouvernement-camerounais-na-rien-fait-pour-resoudre-le-conflit/&title=Crise%20anglophone%2FTibor%20Nagy%20devant%20le%20Congr%C3%A8s%3A%20%C2%ABLe%20gouvernement%20camerounais%20n%E2%80%99a%20rien%20fait%20pour%20r%C3%A9soudre%20le%20conflit%E2%80%A6%C2%BB)

Le sous-secrétaire d’État américain aux Affaires africaines était devant le parlement américain ce jeudi 16 mai 2019.

Tibor Nagy en remet une couche! Le sous-secrétaire d’Etat américain aux Affaires africaines était devant le Congrès des Etats-Unis ce jeudi 16 mai 2019. Il a vertement critiqué la gestion de la crise anglophone par le régime de Paul Biya. «Le gouvernement camerounais n’a rien fait pour résoudre le conflit. L’armée continue de brûler des villages, tandis que des civils sans défense sont obligés de fuir dans les buissons», a indiqué le diplomate américain.

«*Les États-Unis doivent redoubler leurs efforts pour mettre fin au conflit*», a martelé Tibor Nagy, confirmant la position de son pays qui ne serait pas contre une intervention de la communauté internationale pour mettre un terme à la crise qui secoue les régions anglophones du Nord-Ouest et du Sud-Ouest, depuis octobre 2016.

Une crise qui a fait, selon un récent rapport de International Crisis Group, au moins 1850 morts et plus de 530 000 déplacés internes, sans compter les milliers de déplacés externes. Selon les Nations Unies, cette crise qui s’est muée en conflit armé entre les milices séparatistes et les forces gouvernementales depuis près de 20 mois, a aggravé les besoins humanitaires qui touchent désormais 8 régions sur 10 du pays.

En visite dans les zones de conflit depuis une semaine, le Premier Ministre, Joseph Dion Ngute, a annoncé la volonté du Président Paul Biya de dialoguer avec les séparatistes. Un dialogue sur tous les sujets, sauf la sécession, a-t-il souligné. Cette proposition a favorablement été accueillie par les principaux leaders politiques et les organisations de la société civile. Il reste maintenant à définir le cadre du dialogue.

<https://www.237online.com/crise-anglophone-tibor-nagy-devant-le-congres-le-gouvernement-camerounais-na-rien-fait-pour-resoudre-le-conflit/>

1. **Crise anglophone: les USA ont versé plus de 48 milliards au Cameroun**

 237online16 mai 2019

 Temps de lecture 1 minute

[Pinterest](https://pinterest.com/pin/create/button/?url=https://www.237online.com/crise-anglophone-les-usa-ont-verse-plus-de-48-milliards-au-cameroun/&description=Crise%20anglophone%3A%20les%20USA%20ont%20vers%C3%A9%20plus%20de%2048%20milliards%20au%20Cameroun&media=https://www.237online.com/wp-content/uploads/2019/05/biya-et-trump.jpg) [Reddit](https://reddit.com/submit?url=https://www.237online.com/crise-anglophone-les-usa-ont-verse-plus-de-48-milliards-au-cameroun/&title=Crise%20anglophone%3A%20les%20USA%20ont%20vers%C3%A9%20plus%20de%2048%20milliards%20au%20Cameroun)

Le 13 mai aux Nations-Unies, le représentant américain à la rencontre sur la situation humanitaire née de la crise anglophone a révélé que depuis 2018, les États-Unis ont versé au Cameroun plus de 48 milliards FCFA d’assistance humanitaire.

L’ambassadeur américain Cherith Norman Chalet a expliqué que cette aide a été versée aux communautés d’accueil, aux Personnes déplacées internes et aux réfugiés. « *Cette aide est essentielle pour sauver des vies, mais elle ne peut être efficace que si nous avons accès aux populations vulnérables*», a-t-il ajouté.

Les États-Unis ont souhaité au cours de cette rencontre « *une prise de conscience accrue et une visibilité accrue de la détérioration de la situation humanitaire au Cameroun, ainsi que l’ouverture immédiate d’un espace humanitaire et la fourniture d’un accès sans entrave du personnel humanitaire aux parties au conflit* ».

L’International Crisis Group estime à 200 000 le nombre de réfugiés provoqués par la guerre civile en cours dans les régions du Nord-ouest et du sud-ouest du Cameroun. Les affrontements entre l’armée et les milices séparatistes ont déjà fait plus de 1800 morts en 20 mois estime Crisis Group.

<https://www.237online.com/crise-anglophone-les-usa-ont-verse-plus-de-48-milliards-au-cameroun/>

1. **[Cameroun: Paul Biya remercie Poutine pour son soutien lors du débat sur la crise anglophone au conseil de sécurité de l’ONU](https://www.237online.com/cameroun-crise-anglophone-quatre-soldats-et-de-nombreux-separatistes-tues/" \t "_self)**

[**[237online](https://www.237online.com/cameroun-crise-anglophone-quatre-soldats-et-de-nombreux-separatistes-tues/" \t "_self)**](https://www.237online.com/author/237online/)[16 mai 2019](https://www.237online.com/cameroun-crise-anglophone-quatre-soldats-et-de-nombreux-separatistes-tues/" \t "_self)

[2 minutes de lectur](https://www.237online.com/cameroun-crise-anglophone-quatre-soldats-et-de-nombreux-separatistes-tues/" \t "_self)

[En recevant le message du président camerounais ce mercredi 15 mai 2019 des mains du ministre des relations extérieures, l’Ambassadeur de la fédération de Russie à Yaoundé, a rassuré le gouvernement camerounais que son pays est prêt à tout moment pour une éventuelle intervention à ses côtés au sujet de la crise anglophone.](https://www.237online.com/cameroun-crise-anglophone-quatre-soldats-et-de-nombreux-separatistes-tues/" \t "_self)

[Après avoir reçu l’Ambassadeur de Chine à Yaoundé, le ministre des relations extérieures, Lejeune Mbella Mbella, a aussi reçu en audience dans son cabinet à Yaoundé, l’Ambassadeur de la fédération de Russie au Cameroun, Anatoly Bashkin.](https://www.237online.com/cameroun-crise-anglophone-quatre-soldats-et-de-nombreux-separatistes-tues/" \t "_self)

[Le ministre a fait venir le diplomate russe pour lui remettre un message du Chef de l’Etat Paul Biya à son homologue russe Vladimir Poutine. A la sortie de cette audience le diplomate russe a révélé à la presse l’essentiel de ce message.](https://www.237online.com/cameroun-crise-anglophone-quatre-soldats-et-de-nombreux-separatistes-tues/" \t "_self)

[«](https://www.237online.com/cameroun-crise-anglophone-quatre-soldats-et-de-nombreux-separatistes-tues/" \t "_self)*[Nous avons reçu le remerciement du président Paul Biya adressé au président de la fédération de Russie, pour sa position en ce qui concerne la récente discussion au conseil de sécurité de l’ONU sur la situation humanitaire au Cameroun. Notre position est claire : Nous respectons le principe de non-ingérence dans les affaires intérieures de cet Etat. Si le gouvernement du Cameroun demande à la Russe de venir faire quelque chose, on va venir. Mais sans invitation, on ne peut forcer de faire quoi que ce soit](https://www.237online.com/cameroun-crise-anglophone-quatre-soldats-et-de-nombreux-separatistes-tues/" \t "_self)*[» a indiqué Anatoly Bashkin.](https://www.237online.com/cameroun-crise-anglophone-quatre-soldats-et-de-nombreux-separatistes-tues/" \t "_self)

[Le lundi 13 mai dernier lors d’une réunion en formule Arria que le Conseil de sécurité de l’ONU a tenue à New-York sur la situation humanitaire au Cameroun, la Russie est montée au créneau pour défendre le gouvernement camerounais qui dénonce une ingérence criarde de la communauté internationale dans la gestion de la crise anglophone.](https://www.237online.com/cameroun-crise-anglophone-quatre-soldats-et-de-nombreux-separatistes-tues/" \t "_self)

[«](https://www.237online.com/cameroun-crise-anglophone-quatre-soldats-et-de-nombreux-separatistes-tues/" \t "_self)*[Il est important de ne pas franchir la frontière entre prévention et intervention dans les affaires intérieures des États. Tout porte à croire qu’un certain nombre de nos collègues (Etats unis d’Amérique, Norvège , Le Royaume uni, Allemagne République Dominicaine…) sont très proches de cela. Pour le moment, nous avons toutes les raisons de croire que le Cameroun est capable de résoudre ce problème épineux tout seul. Nous sommes disposés à aider, mais seulement si nos partenaires au Cameroun le jugent nécessaire](https://www.237online.com/cameroun-crise-anglophone-quatre-soldats-et-de-nombreux-separatistes-tues/" \t "_self)*[» déclaration de Poutine, rapportée par la cellule communication des services du Premier ministre camerounais.](https://www.237online.com/cameroun-crise-anglophone-quatre-soldats-et-de-nombreux-separatistes-tues/" \t "_self)

<https://www.237online.com/cameroun-paul-biya-remercie-poutine-pour-son-soutien-lors-du-debat-sur-la-crise-anglophone-au-conseil-de-securite-de-lonu/>

# Crise anglophone : Paul Biya active de nouveaux leviers d’apaisement

[**237online**](https://www.237online.com/author/237online/)15 mai 2019

 2 minutes de lecture

[Pinterest](https://pinterest.com/pin/create/button/?url=https://www.237online.com/crise-anglophone-paul-biya-active-de-nouveaux-leviers-dapaisement/&description=Crise%20anglophone%20%3A%20Paul%20Biya%20active%20de%20nouveaux%20leviers%20d%E2%80%99apaisement&media=https://www.237online.com/wp-content/uploads/2019/01/crise-anglophone.jpg)

Dans sa stratégie de rebond, le chef de l’État pourrait prendre des décisions exceptionnelles avant le 20 mai prochain.

Paul Biya a-t-il constaté que, relativement à la situation sociopolitique dans les régions du Nord-Ouest et du Sud-Ouest, son magistère politico-militaire s’est dilué au fil du temps ? La réponse est à lire dans la sortie (très médiatisée) de Chief Joseph Dion Ngute à Bamenda la semaine dernière. Sur la foi des propos rapportés sur Twitter par CRTV web le 10 mai 2019, le Premier ministre (PM) a déclaré que «*le président de la République est prêt à organiser un dialogue formel pour résoudre la crise*». Évitant à dessein de parler d’un quelconque compromis, l’envoyé spécial du chef de l’État a davantage implicitement parlé d’une décision unilatérale en forme de main tendue du président de la République. Il s’est résolu à ajuster son tir en infléchissant sa position face à une défiance devenue incontrôlable.

Dans son laboratoire d’idées, Paul Biya a usé d’un premier levier : mettre autour de la table le plus grand nombre d’acteurs possible pour discuter de la sortie de crise, suivant un ordre du jour déjà arrêté. Chief Joseph Dion Ngute l’a d’ailleurs décliné : «*hormis la séparation et la sécession, parce que lui en tant que chef de l’État, il a juré de garder le pays uni, donc la séparation n’est pas à l’ordre du jour, tout autre point peut être discuté. Tout problème politique peut être discuté et il est en train d’organiser une rencontre au cours de laquelle il va débattre de ce problème*».

Selon des hommes de « réseaux », un second levier pourrait accompagner le premier dans les prochains jours. D’ici le 20 mai, jour de la fête de l’Unité du Cameroun, quelques gros bonnets de la crise anglophone, actuellement en détention, pourraient bénéficier de la grâce présidentielle. Parce que c’est l’un des paramètres qui ont longtemps structuré la radicalisation dans le Nord-Ouest et le Sud-Ouest, cette remise en liberté est un signe d’apaisement très attendu avant le début du dialogue.

Nos sources renseignent aussi que le temps est aux grandes manœuvres entre Yaoundé et certains leaders d’opinion. À Bamenda, le 10 mai dernier, Ni John Fru Ndi s’est entretenu avec le PM. Le président du Social Democratic Front (SDF) a souhaité que lui soit confiée la responsabilité de médiation entre les élites anglophones. Et selon le sens d’orientation que le gouvernement veut donner à la « grande palabre », le nom du Cardinal Christian Tumi est aussi chuchoté. Le tout est, apprend-on, de fructifier les acquis des consultations engagées par le prélat dans la perspective de la tenue de la All Anglophone Conference.

Vu sous cet angle, le troisième levier de Paul Biya permet de procéder à un premier tour exploratoire, avant de faire le point sur des positions en présence. Toujours au centre du jeu, il laisse mijoter un petit monde en se gardant de donner un indice définitif sur celui ou celle qu’il pourrait adouber in fine. En tout cas, a commenté Jean-Baptiste Atemengue sur les antennes de la radio urbaine Satellite FM, émettant à partir de Yaoundé, «*dans cette période, on doit avoir une seule préoccupation : la sortie de crise. Chacun doit prendre ses responsabilités. On a besoin de paroles et de gestes politiques qui appellent à l’apaisement* ».

<https://www.237online.com/crise-anglophone-paul-biya-active-de-nouveaux-leviers-dapaisement/>

1. **Cameroun – crise anglophone: Entrée triomphale de Dion Ngute au Sud-Ouest**

[**237online**](https://www.237online.com/author/237online/)14 mai 2019

 2 minutes de lecture

[Pinterest](https://pinterest.com/pin/create/button/?url=https://www.237online.com/cameroun-crise-anglophone-entree-triomphale-de-dion-ngute-au-sud-ouest/&description=Cameroun%20%E2%80%93%20crise%20anglophone%3A%20Entr%C3%A9e%20triomphale%20de%20Dion%20Ngute%20au%20Sud-Ouest&media=https://www.237online.com/wp-content/uploads/2019/05/Dion-Ngute-buea.jpg) [Reddit](https://reddit.com/submit?url=https://www.237online.com/cameroun-crise-anglophone-entree-triomphale-de-dion-ngute-au-sud-ouest/&title=Cameroun%20%E2%80%93%20crise%20anglophone%3A%20Entr%C3%A9e%20triomphale%20de%20Dion%20Ngute%20au%20Sud-Ouest)

Le chef du gouvernement camerounais, M. Dion Ngute Joseph, est arrivé ce matin dans la région du Sud-Ouest pour une visite de travail de quatre jours dans le prolongement de sa mission de paix dans les régions agitées du Nord-Ouest et du Sud-Ouest du pays.

Des groupes de danse, des commerçantes, des cyclistes, des politiciens, des chefs traditionnels, des représentants de l’élite et des responsables de l’administration et de la sécurité du Sud-Ouest faisaient partie de la foule immense qui convergeait vers le pont Mungo, porte d’entrée de la région du Sud-Ouest, pour donner au Premier ministre une réception messianique.

Le convoi de Dion Ngute a traversé le pont de Mungo dans la région du Sud-Ouest à 11 heures précises. Le Gouverneur Okalia Bilai Bernard lui a offert la première poignée de main de bienvenue avant que d’autres responsables ne se lancent dans des chants de joie et des applaudissements de la part de nombreux groupes de danseurs et de groupes socio-culturels ayant honoré son rendez-vous avec l’histoire.

Les dirigeants traditionnels de la région du Sud-Ouest ont conduit le Premier ministre dans une hutte traditionnelle construite le long des berges du fleuve Mungo. Là-bas, Dion Ngute était vêtu de tenues de cérémonie traditionnelles, dignes de son rang et de ses prérogatives de Premier ministre, chef du gouvernement et chef traditionnel de la région.

Quand ils sont sortis de la hutte traditionnelle, le Premier ministre et ses pairs – les dirigeants traditionnels ont célébré un rite sur les rives de la rivière avant de prendre la route de Buea. Le parcours de son convoi a été aligné par une population enthousiaste qui a soif d’un retour à la paix.

Le chef du gouvernement est dans la région du Sud-Ouest en tant que porteur du message du chef de l’État aux habitants de la région agitée. Il avait déclaré à la population de la région du Nord-Ouest que le chef de l’Etat, le président Paul Biya, était ouvert à un dialogue inclusif avec de véritables représentants des masses souffrantes des deux régions sur tous les sujets excluant la séparation.

Il a appelé tous les habitants des buissons à déposer leurs armes et à se rendre à la table de dialogue. Le Premier ministre Dion Ngute a déclaré que la situation dans ces deux régions n’épargnait personne et qu’il était donc temps de donner une chance à la paix.

Ce mardi, le Premier ministre Dion Ngute tiendra une séance de travail d’une heure avec les responsables de l’administration et de la sécurité à partir de 14h00, les autorités administratives, les chefs des services de sécurité, les élites locales et extérieures du Sud-Ouest, les maires, les délégués gouvernementaux, les membres du L’Assemblée générale, et les sénateurs se rencontreront à tour de rôle pour rencontrer le Premier ministre.

Mercredi, les chefs de partis politiques légalisés seront reçus individuellement par le Premier ministre. Les autorités traditionnelles, puis les autorités religieuses s’entretiendront avec le chef du gouvernement à deux audiences distinctes avant son départ pour Limbé, où il tiendra des audiences similaires et remettra du matériel de pêche.

Il quittera Buea pour Kumba, jeudi, où il devrait prêcher l’évangile de la paix avant de rentrer à Buea le même jour.

Le Premier ministre terminera sa visite dans la région du Sud-Ouest le vendredi 17 mai 2019 après avoir eu des discussions approfondies avec les habitants de la région.

<https://www.237online.com/cameroun-crise-anglophone-entree-triomphale-de-dion-ngute-au-sud-ouest/>

1. **Cameroun: Le Groupe SABC paie un lourd tribut de la crise anglophone**

[**237online**](https://www.237online.com/author/237online/)14 mai 2019

 2 minutes de lecture

[Pinterest](https://pinterest.com/pin/create/button/?url=https://www.237online.com/cameroun-le-groupe-sabc-paie-un-lourd-tribut-de-la-crise-anglophone/&description=Cameroun%3A%20Le%20Groupe%20SABC%20paie%20un%20lourd%20tribut%20de%20la%20crise%20anglophone&media=https://www.237online.com/wp-content/uploads/2018/10/sabc-contribuable-2017.jpg) [Reddit](https://reddit.com/submit?url=https://www.237online.com/cameroun-le-groupe-sabc-paie-un-lourd-tribut-de-la-crise-anglophone/&title=Cameroun%3A%20Le%20Groupe%20SABC%20paie%20un%20lourd%20tribut%20de%20la%20crise%20anglophone)

Son chiffre d’affaires est passé de 334,9 milliards de Fcfa en 2017 à 314,4 milliards de Fcfa en 2018, soit une baisse d’environ 20 milliards de Fcfa. C’est dans ce contexte difficile que l’assemblée générale des actionnaires de ce groupe va adopter les comptes de cet exercice, le 15 mai prochain à Douala.

Les actionnaires du Groupe Société Anonyme des Brasseries du Cameroun (SABC), de la Société des Eaux minérales du Cameroun (Semc) et de la Société Camerounaise de Verrerie (Socaver) ont rendez-vous le 15 mai prochain, au Castel Hall, sis à Douala. Ce sera, selon une annonce légale parue dans une édition du quotidien à capitaux publics, Cameroon tribune, à l’occasion de l’assemblée générale ordinaire. Une instance qui devra délibérer notamment sur le rapport de gestion du conseil d’administration, le rapport général des commissaires aux comptes. Tout comme il sera aussi question de procéder à l’approbation de l’ajustement du report à nouveau des exercices antérieurs au 1er janvier 2018 ; l’approbation des états financiers de synthèse de l’exercice social clos le 31 décembre 2018 ; l’approbation des états financiers de synthèse consolidé de l’exercice social clos le 31 décembre 2018 ; l’affection du résultat ; la fixation du dividende et de sa mise en paiement, etc. Il faut relever que cette assemblée générale des actionnaires va se tenir dans un contexte difficile, avec les résultats du groupe en deçà des attentes.

En effet, au cours de l’exercice 2018, le Groupe SABC a enregistré en 2018 un chiffre d’affaires TTC de 560,4 milliards de FCFA. Après déduction des ristournes, pour un montant de 28,7 milliards de FCFA, et des taxes, pour 217,3 milliards de FCFA, le chiffre d’affaires HT de l’année 2018 s’est établi à 314,4 milliards de F CFA contre 334,9 milliards en 2017, soit une baisse d’environ 20 milliards de FCFA. Le leader de l’industrie brassicole du pays traverse donc une mauvaise passe. Pourtant, en 2018, précise-t-on, la SABC a enregistré 2 % d’augmentation de ses volumes de vente. Une progression remarquable mais qui reste en retrait par rapport aux perspectives du marché, nettement plus ambitieuses. L’entreprise est en fait entravée par la dégradation du contexte économique depuis 2017 et par l’accroissement du risque sécuritaire.

Comme la plupart des grandes entreprises, la filiale du groupe français Castel subit de plein fouet la crise dans la zone anglophone (qui représente 20 % de son chiffre d’affaires). Des bandes séparatistes affrontent l’armée dans les régions du Nord-Ouest et du Sud-Ouest. « Le bilan est très lourd, déplore Emmanuel de Tailly, le directeur général de la SABC. Entre janvier 2017 et janvier 2019, nos points de vente et distributeurs ont enregistré 15 attaques à mains armées, tandis qu’une dizaine de véhicules [camions ou pick-up] étaient incendiés. Le coût de ces destructions s’élève, avec celui des produits et emballages emportés ou détruits, à plus de 500 millions de FCFA », précisait-il dans les colonnes de l’hebdomadaire panafricain Jeune Afrique.

Dans ces deux régions du pays, les insurgés imposent des journées « villes mortes », et dès juin 2018, la SABC a décidé de fermer des centres de distribution à Muyuka, Mamfé et Kumba, dans le Sud-Ouest, et à Wum, Fundong, Kumbo et Nkambe, dans le Nord-Ouest, face aux risques de kidnapping et aux menaces journalières proférées à l’encontre de ses agents. « Nous n’avions pas le choix, il fallait garantir la sécurité de nos salariés et de leurs familles, explique de Tailly. Les périodes de fermeture s’élèvent à 350 jours, soit un manque à gagner de plus de 400 millions de FCFA. Tout cela nous a fait perdre dix points de croissance. »

<https://www.237online.com/cameroun-le-groupe-sabc-paie-un-lourd-tribut-de-la-crise-anglophone/>

1. **Cameroun – Crise anglophone: Le Chef de l’Etat va recevoir les ex-combattants de la République fantôme d’Ambazonie**

[**237online**](https://www.237online.com/author/237online/)12 mai 2019

 Temps de lecture 1 minute

[Pinterest](https://pinterest.com/pin/create/button/?url=https://www.237online.com/cameroun-crise-anglophone-le-chef-de-letat-va-recevoir-les-ex-combattants-de-la-republique-fantome-dambazonie/&description=Cameroun%20%E2%80%93%20Crise%20anglophone%3A%20Le%20Chef%20de%20l%E2%80%99Etat%20va%20recevoir%20les%20ex-combattants%20de%20la%20R%C3%A9publique%20fant%C3%B4me%20d%E2%80%99Ambazonie&media=https://www.237online.com/wp-content/uploads/2019/05/ambazonie-guerre.jpg) [Reddit](https://reddit.com/submit?url=https://www.237online.com/cameroun-crise-anglophone-le-chef-de-letat-va-recevoir-les-ex-combattants-de-la-republique-fantome-dambazonie/&title=Cameroun%20%E2%80%93%20Crise%20anglophone%3A%20Le%20Chef%20de%20l%E2%80%99Etat%20va%20recevoir%20les%20ex-combattants%20de%20la%20R%C3%A9publique%20fant%C3%B4me%20d%E2%80%99Ambazonie)

 Des jeunes font face aux forces de maintien de l'ordre

Avant de quitter Bamenda, chef-lieu de la Région du Nord-Ouest, au terme d’une visite de travail de quatre jours, le premier ministre, chef du gouvernement, s’est rendu au Centre régional de désarmement, de démobilisation et de réintégration.

Six mois après sa création par le Président de la République, le Centre national de désarmement, de démobilisation et de réintégration (CNDDR) a enregistré dans sa représentation de Bamenda, 35 combattants séparatistes (âgés entre 15 et 27 ans) qui ont accepté l’offre de paix du gouvernement central pour abandonner la guerre de sécession.

Ces 35 désormais ex-combattants dont six femmes, cantonnés dans le centre régional de désarmement, de démobilisation et de réintégration du Nord-Ouest, ont reçu hier samedi 11 mai 2019, la visite du Premier ministre Joseph DION NGUTE.

Selon la CRTV Radio, les anciens miliciens repentis, ont chanté l’hymne national d’un Cameroun un et indivisible pour exprimer leur engagement à ne plus prendre les armes contre la patrie.

« *Le président Paul Biya en tant que père, votre père, a compris que vous avez commis une erreur mais, il a décidé de vous accorder une seconde chance. Saisissez-la, parce que votre avenir est devant et il est prometteur* » déclaration du Chef du gouvernement, rapportée par son chargé de communication Jean Pierre Ndzana.

Toujours selon ce dernier, Joseph DION NGUTE a aussi déclaré aux ex-combattants que le chef de l’Etat est pleinement disposé à ordonner un recrutement spécial en leur faveur.

Avant de quitter les lieux, le Premier ministre a fait savoir aux ex-combattants que Paul Biya, le Chef de l’Etat, les recevra bientôt, «*dans les plus brefs délais*» a précisé le chef du gouvernement.

Sisiku Julius Ayuk Tabe, le leader de la République fantôme d’Ambazonie et 46 autres leaders du mouvement séparatiste anglophone, sont emprisonnés depuis environ 16 mois à Yaoundé. Leur arrestation n’a pas mis fin à la guerre qui oppose depuis trois ans l’armée régulière aux activistes de la crise anglophone qui luttent pour l’indépendance des Régions du Sud-Ouest et Nord-Ouest

<https://www.237online.com/cameroun-crise-anglophone-le-chef-de-letat-va-recevoir-les-ex-combattants-de-la-republique-fantome-dambazonie/>

1. **Face aux pressions internationales, Yaoundé se dit prêt à dialoguer pour résoudre la crise anglophone**

[**237online**](https://www.237online.com/author/237online/)11 mai 2019

 3 minutes de lecture

[Pinterest](https://pinterest.com/pin/create/button/?url=https://www.237online.com/face-aux-pressions-internationales-yaounde-se-dit-pret-a-dialoguer-pour-resoudre-la-crise-anglophone/&description=Face%20aux%20pressions%20internationales%2C%20Yaound%C3%A9%20se%20dit%20pr%C3%AAt%20%C3%A0%20dialoguer%20pour%20r%C3%A9soudre%20la%20crise%20anglophone&media=https://www.237online.com/wp-content/uploads/2019/05/paul-biya-crtv.jpg) [Reddit](https://reddit.com/submit?url=https://www.237online.com/face-aux-pressions-internationales-yaounde-se-dit-pret-a-dialoguer-pour-resoudre-la-crise-anglophone/&title=Face%20aux%20pressions%20internationales%2C%20Yaound%C3%A9%20se%20dit%20pr%C3%AAt%20%C3%A0%20dialoguer%20pour%20r%C3%A9soudre%20la%20crise%20anglophone)

Face aux pressions internationales, le président Paul Biya se dit prêt à organiser un dialogue pour résoudre la crise anglophone au Cameroun.

Une ouverture tranchant avec l’intransigeance affichée jusque-là par Yaoundé, qui exclut cependant toujours toute discussion sur la partition du pays comme le prônent les séparatistes.

« *Le président m’envoie dire aux populations du Nord-ouest que, hormis la séparation et la sécession, tout sujet politique peut être discuté et il se prépare à le faire*« , a annoncé le Premier ministre Joseph Dion Ngute, en tournée dans les régions anglophones depuis jeudi où il est arrivé, une branche de Fekeng, l’arbre de la paix camerounais, à la main.

Le président est « en train d’organiser des rencontres » dans le cadre de ce dialogue, a révélé M. Dion Ngute, sans en préciser les contours ni l’agenda.

De son côté, depuis trois semaines, Paul Biya multiplie les déclarations sur Twitter, appelant à l’unité et à la paix.

« *Depuis le début de la crise, c’est la première fois que Yaoundé se déclare aussi directement ouvert au dialogue*« , souligne Hans de Marie Heungoup, chercheur à l’International Crisis Group (ICG) sur l’Afrique centrale.

Les déclarations de Yaoundé interviennent alors que les pressions internationale exercées sur le pouvoir camerounais se sont intensifiées ces derniers mois.

Début février, par exemple, les Etats-Unis ont mis un terme à plusieurs programmes d’aide militaire et sécuritaire. De son côté, le Parlement européen a adopté mi-avril une résolution invitant les autorités camerounaises à « mettre un terme » de façon urgente « aux violences ».

Lundi, une réunion du conseil de sécurité de l’ONU sur la situation humanitaire au Cameroun doit se tenir à New-York.

« *Il est possible que le président Paul Biya essaie de gagner du temps auprès de la communauté internationale*« , estime le chercheur de l’ICG. Cette ouverture « *envoie un signal positif à ceux qui seront assis autour de la table et qui seront alors peut-être moins durs vis-à-vis du gouvernement*« .

Bien qu’excluant toute discussion sur une possible indépendance des régions anglophones, le président se dit prêt « à discuter de tout ».

« Cela inclut alors de parler du régionalisme, du fédéralisme, voire de la confédération », souligne M. Heungoup.

« *Le discours du Premier ministre peut s’avérer apaisant*« , estime, quant à lui, Blaise Chamango, acteur de la société civile établi à Buea, chef-lieu du Sud-Ouest, l’une des deux régions anglophones. Surtout que « *la sécession n’a jamais été l’agenda premier des anglophones*« , selon lui.

La crise, qui a déjà contraint 530.000 personnes à fuir leur domicile, a commencé en novembre 2016, avec essentiellement des revendications d’enseignants ou de juristes, réclamant plus de représentativité anglophone.

Les leaders de la contestation demandaient en majorité un retour au fédéralisme et, pour une minorité, l’indépendance et la proclamation d’un nouvel Etat, l’Ambazonie.

– « Des mots encourageants » –

Mais face à l’intransigeance de Yaoundé et à la répression des manifestations pacifiques, le conflit s’est durci. Fin 2017, une partie des séparatistes ont pris les armes contre Yaoundé.

Depuis, des combats opposent presque quotidiennement l’armée, déployée en nombre, à des groupes épars de séparatistes armés cachés dans la forêt.

« *J’invite tous les Camerounais épris de paix à prendre part au dialogue*« , a déclaré lors de sa visite le Premier ministre. « Je suis venu ici pour demander aux jeunes de sortir (de la brousse) pour un retour à une vie normale ».

Des « mots encourageants » à prendre avec précaution, selon M. Heungoup. « Par le passé, le pouvoir a pu montrer des signes d’ouverture, avant de reprendre des positions encore plus conservatrices ».

Pour trouver une sortie de crise, « *il faut plus que des mots, il faut des actions concrètes*« , souligne-t-il.

En juillet 2018, des responsables religieux anglophones ont annoncé un projet de conférence générale anglophone. Mais face à l’opposition du pouvoir, les organisateurs ont dû la repousser deux fois.

« Pourquoi ne pas autoriser sa tenue ? », suggère le chercheur.

– « Trouver un interlocuteur crédible » –

Si dialogue il y a, il sera difficile de trouver « un interlocuteur crédible capable à la fois de négocier avec le gouvernement et d’être suivi par les combattants séparatistes », estime de son côté un acteur de la société civile sur place.

Pour lui, Julius Ayuk Tabe, président autoproclamé de l’Ambazonie, écroué à Yaoundé et poursuivi notamment pour sécession et terrorisme, paraît avoir le meilleur profil pour jouer ce rôle d’interlocuteur car il « *est respecté et écouté*« .

M. Ayuk Tabe se dit disposé à négocier avec Yaoundé mais pose comme préalable sa libération et celle tous les autres détenus de la crise anglophone, selon un de ses avocats, Me Christopher Ndong.

Plus largement, les sécessionnistes devront être associés au dialogue, estime le chercheur de l’ICG « *même si ce n’est que pour parler du fédéralisme*« . « *Car ce sont eux qu’écoutent les 4.000 combattants sur le terrain, pas les chefs traditionnels, les parlementaires ou les élus locaux*« .

<https://www.237online.com/face-aux-pressions-internationales-yaounde-se-dit-pret-a-dialoguer-pour-resoudre-la-crise-anglophone/>

1. **Crise anglophone – Mrc : les Usa tiennent le gouvernement du Cameroun pour responsable**

[**237online**](https://www.237online.com/author/237online/)11 mai 2019

 Temps de lecture 1 minute

[Pinterest](https://pinterest.com/pin/create/button/?url=https://www.237online.com/crise-anglophone-mrc-les-usa-tiennent-le-gouvernement-du-cameroun-pour-responsable/&description=Crise%20anglophone%20%E2%80%93%20Mrc%20%3A%20les%20Usa%20tiennent%20le%20gouvernement%20du%20Cameroun%20pour%20responsable&media=https://www.237online.com/wp-content/uploads/2019/05/Senat-americain.jpg) [Reddit](https://reddit.com/submit?url=https://www.237online.com/crise-anglophone-mrc-les-usa-tiennent-le-gouvernement-du-cameroun-pour-responsable/&title=Crise%20anglophone%20%E2%80%93%20Mrc%20%3A%20les%20Usa%20tiennent%20le%20gouvernement%20du%20Cameroun%20pour%20responsable)

Ce rappel est contenu dans une résolution du Sénat américain sur la situation sociopolitique au Cameroun.

Les élus américains ont exprimé leurs préoccupations sur la détérioration de la situation sociopolitique au Cameroun.

Dans une résolution adoptée ce 10 mai 2019, le Sénat des Etats-Unis focalise ses inquiétudes sur la crise anglophone et les obstructions répétées aux libertés, notamment l’incarcération de l’un des principaux opposants au régime de Yaoundé, Maurice Kamto, incarcéré depuis le mois de janvier 2019 avec une centaine de ses partisans.

Pour les sénateurs américains, les «*États-Unis continuent de tenir le gouvernement du Cameroun pour responsable du respect des droits de tous les citoyens, quelles que soient leurs opinions ou convictions politiques ou la région dans laquelle ils résident, conformément aux obligations internationales du Cameroun et à la propre Constitution du Cameroun* ».

Le Sénat américain condamne les violences dans les régions anglophones et appelle « *le gouvernement camerounais et les groupes armés à respecter les droits humains de tous les citoyens camerounais, à mettre un terme à toutes les violences et à engager un dialogue large, sans condition préalable, pour résoudre le conflit dans les régions du Nord-Ouest et du Sud-Ouest* ».

La Chambre des représentants des Etats-Unis demande d’« engager un dialogue élargi sans condition préalable et faire un effort de foi crédible pour travailler avec les chefs religieux et communautaires de la région anglophone afin de régler les griefs et de rechercher des solutions non violentes pour résoudre les conflits et des réformes constitutionnelles susceptibles de protéger les préoccupations des minorités ».

Par ailleurs, le Sénat « *exhorte toutes les parties, y compris les groupes d’opposition politique, à faire preuve de retenue et à veiller à ce que les manifestations restent pacifiques*».

Une demande de libération de tous les prisonniers détenus dans le cadre de la crise anglophone et des manifestations du Mrc est également formulée au gouvernement du Cameroun.

Les groupes séparatistes sont par la même occasion appelés à dialoguer sans condition avec le gouvernement.

<https://www.237online.com/crise-anglophone-mrc-les-usa-tiennent-le-gouvernement-du-cameroun-pour-responsable/>

1. **Cameroun – crise anglophone: Paul Biya accepte enfin d’ouvrir le Dialogue**

[**237online**](https://www.237online.com/author/237online/)9 mai 2019

 2 minutes de lecture

[Pinterest](https://pinterest.com/pin/create/button/?url=https://www.237online.com/cameroun-crise-anglophone-paul-biya-accepte-enfin-douvrir-le-dialogue/&description=Cameroun%20%E2%80%93%20crise%20anglophone%3A%20Paul%20Biya%20accepte%20enfin%20d%E2%80%99ouvrir%20le%20Dialogue&media=https://www.237online.com/wp-content/uploads/2019/05/paul-biya-crtv.jpg) [Reddit](https://reddit.com/submit?url=https://www.237online.com/cameroun-crise-anglophone-paul-biya-accepte-enfin-douvrir-le-dialogue/&title=Cameroun%20%E2%80%93%20crise%20anglophone%3A%20Paul%20Biya%20accepte%20enfin%20d%E2%80%99ouvrir%20le%20Dialogue)

Tant demandé par de nombreux observateurs, ce Dialogue annoncé par le premier ministre Dion Ngute pourrait finalement avoir lieu dans les prochaines semaines.

Selon Dion Ngute le chef du gouvernement qui effectue depuis ce jeudi 9 avril une visite de travail dans les régions du Nord-ouest et du Sud-ouest, le président Paul Biya est en train de prendre des mesures pour qu’un dialogue sur la crise anglophone ait lieu. « *Pour les problèmes politiques, il m’a demandé de dire que hormis la séparation et la sécession, parce que lui en tant que chef de l’Etat, il a juré de garder le pays uni, donc la séparation n’est pas à l’ordre du jour, tout autre point peut être discuté. Tout problème politique peut être discuté et il est en train d’organiser une rencontre au cours de laquelle il va débattre de ce problème. Donc ça ne sert à rien que ces jeunes continuent à rester dans la brousse, à se cacher dans les villes et de détruire la communauté comme ils sont en train de faire.*»

« *Je ne veux pas me militer aux élites. Je voudrais parler à toutes les couches de la population, aux benkineurs, aux organisations de femmes, aux bayam Sellam qui peuvent porter ce message envers ces jeunes qui sont pour le moment pratiquement perdus*».

Le Premier ministre qui a eu une série d’échanges avec les autorités locales, administratives et traditionnelles du Nord Ouest dit être venu apporter le message de paix de Paul Biya l’endroit des populations des régions anglophone. « *Le président de la République m’a instruit de venir dans la région du Nord-Ouest pour porter un message de paix, un message de réconciliation à ces populations, qui ont été meurtries par beaucoup d’actes qui n’auraient pas dû être commis par nos jeunes.*»

« *Il m’a demandé de leur dire qu’ils restent les enfants du Cameroun et de ce fait, ils ne doivent pas se priver d’une éducation comme ils le font. Ils ne doivent pas infliger à la société ce qu’ils sont en train de faire : les villes mortes, les rançons après enlèvements, les gens ne peuvent pas circuler librement dans leurs propres pays.* »

« *Il a demandé que je les informe qu’il faut qu’ils déposent leurs armes, qu’ils se rendent dans les centres de DDR [désarmement, démobilisation et réinsertion, Ndlr] où ils seront pris en charge gratuitement, où on va tout faire pour leur trouver quelque chose à faire.* »

Joseph Dion Ngute se rendra ensuite dans à Buea dans la région du Sud-ouest.

C’est le tout premier déplacement du chef du gouvernement dans deux régions, en proie à une guerre civile, depuis sa nomination le 4 janvier 2019.

<https://www.237online.com/cameroun-crise-anglophone-paul-biya-accepte-enfin-douvrir-le-dialogue/>

1. **Cameroun – Crise Anglophone: La situation risque de devenir « totalement incontrôlable » selon la Haut-Commissaire de l’ONU aux droits de l’homme**

[**237online**](https://www.237online.com/author/237online/)8 mai 2019

 2 minutes de lecture

[Pinterest](https://pinterest.com/pin/create/button/?url=https://www.237online.com/cameroun-crise-anglophone-la-situation-risque-de-devenir-totalement-incontrolable-selon-la-haut-commissaire-de-lonu-aux-droits-de-lhomme/&description=Cameroun%20%E2%80%93%20Crise%20Anglophone%3A%20La%20situation%20risque%20de%20devenir%20%C2%AB%20totalement%20incontr%C3%B4lable%20%C2%BB%20selon%20la%20Haut-Commissaire%20de%20l%E2%80%99ONU%20aux%20droits%20de%20l%E2%80%99homme&media=https://www.237online.com/wp-content/uploads/2019/05/Michelle-Bachelet.jpg) [Reddit](https://reddit.com/submit?url=https://www.237online.com/cameroun-crise-anglophone-la-situation-risque-de-devenir-totalement-incontrolable-selon-la-haut-commissaire-de-lonu-aux-droits-de-lhomme/&title=Cameroun%20%E2%80%93%20Crise%20Anglophone%3A%20La%20situation%20risque%20de%20devenir%20%C2%AB%20totalement%20incontr%C3%B4lable%20%C2%BB%20selon%20la%20Haut-Commissaire%20de%20l%E2%80%99ONU%20aux%20droits%20de%20l%E2%80%99homme)

Madame Michelle Bachelet a plaidé auprès du Gouvernement camerounais en faveur de mesures pour réduire les tensions dans les régions en crise.

Après une visite de travail la semaine dernière au Cameroun, la Haut-Commissaire des Nations Unies aux droits de l’homme, Michelle Bachelet s’est félicitée de la volonté affichée par les autorités du Cameroun de rechercher des solutions à la crise dans les régions du Nord-Ouest et du Sud-Ouest, a rapporté les Nations Unies, lundi 6 mai 2019, sur son site.

Madame Michelle Bachelet pense qu’il existe une possibilité, « *même si elle est restreinte, de mettre fin aux crises qui ont entraîné le déplacement de centaines de milliers de personnes, ainsi que des meurtres et des violations des droits de l’homme* » dans le Sud-Ouest, le Nord-Ouest et à l’Extrême-Nord.

Elle estime qu’«*il ne sera pas facile de remédier à ces situations* » et il faudra des mesures urgentes et importantes de la part du Gouvernement, de même qu’un soutien substantiel et soutenu de la communauté internationale.

« *Les défis sont immenses et la situation impliquant environ une dizaine de mouvements séparatistes dans les régions du Nord-Ouest et du Sud-Ouest risque de devenir totalement incontrôlable si des mesures sérieuses ne sont pas prises pour réduire les tensions et rétablir la confiance. De l’avis général, il faut aussi s’attaquer aux causes profondes et aux griefs sous-jacents si l’on veut rétablir la stabilité à long terme dans un pays qui était, jusqu’à quelques années encore, l’un des plus stables et des plus pacifiques de la région*», a-t-elle dit.

Madame Michelle Bachelet juge que la Commission nationale pour la promotion du bilinguisme et du multiculturalisme et le Comité national de désarmement, de démobilisation et de réintégration peuvent apporter d’importantes contributions au fil du temps dans la gestion de la crise dite anglophone.

D’après la cheffe des droits de l’homme des Nations Unies, il est essentiel que les membres des forces de sécurité à l’origine d’infractions graves rendent des comptes.

Madame Michelle Bachelet a souligné que « la seule façon de résoudre les problèmes dans les deux régions occidentales consiste à engager un dialogue, y compris une analyse approfondie des causes profondes des troubles. Elle a exhorté toutes les parties, y compris le Gouvernement, à déployer tous leurs efforts pour mettre fin aux combats et commencer les pourparlers de paix ».

Elle a également soulevé la question de l’arrestation de Maurice Kamto et ses partisans. Michelle Bachelet a exhorté au Gouvernement à mettre fin à la pratique d’accusation des civils devant les tribunaux militaires. « *Je crois qu’il faut de toute urgence changer d’approche à l’égard des responsables politiques dissidents et des membres critiques de la société civile, et poser des gestes significatifs pour rétablir la confiance*», a-t-elle déclaré.

<https://www.237online.com/cameroun-crise-anglophone-la-situation-risque-de-devenir-totalement-incontrolable-selon-la-haut-commissaire-de-lonu-aux-droits-de-lhomme/>

1. **Cameroun – Crise anglophone: Plus de 4 000 employés perdent leur emploi dans le Nord-Ouest**

[**237online**](https://www.237online.com/author/237online/)7 mai 2019

 Temps de lecture 1 minute

[Pinterest](https://pinterest.com/pin/create/button/?url=https://www.237online.com/cameroun-crise-anglophone-plus-de-4-000-employes-perdent-leur-emploi-dans-le-nord-ouest/&description=Cameroun%20%E2%80%93%20Crise%20anglophone%3A%20Plus%20de%204%20000%20employ%C3%A9s%20perdent%20leur%20emploi%20dans%20le%20Nord-Ouest&media=https://www.237online.com/wp-content/uploads/2018/10/bamenda-pacifie.jpg) [Reddit](https://reddit.com/submit?url=https://www.237online.com/cameroun-crise-anglophone-plus-de-4-000-employes-perdent-leur-emploi-dans-le-nord-ouest/&title=Cameroun%20%E2%80%93%20Crise%20anglophone%3A%20Plus%20de%204%20000%20employ%C3%A9s%20perdent%20leur%20emploi%20dans%20le%20Nord-Ouest)

Ces Camerounais désormais en chômage, font partie des victimes de la crise sociopolitique qui sévit dans les régions du Nord-Ouest et Sud-Ouest.

La crise socio-politique qui sévit depuis près de trois ans, dans les régions du Nord-Ouest et Sud-Ouest, a des conséquences néfastes dans le secteur socio-économique camerounais et principalement dans les deux régions touchées. Lors de la célébration de la 133e fête du travail, le 1er mai dernier, le délégué régional du ministère du Travail et de la Sécurité Sociale de la région du Nord-Ouest, a dressé un bilan plutôt déplorable de la situation socio-économique dans cette zone. En effet, selon le délégué, près de 4000 employés ont été contraints au chômage à cause des tensions socio-politiques. Lors du défilé, une quinzaine d’entreprises seulement, sur les 100 enregistrées dans la ville de Bamenda ont participé à la parade.

Avant la sortie du délégué régional du Nord-Ouest, le Groupement inter-patronal du Cameroun (Gicam) avait déjà tiré la sonnette d’alarme dans un rapport publié au mois de juillet 2018. Le Gicam avait estimé, le manque à gagner des entreprises à plus de 269 milliards F Cfa et à plus de 6434 emplois déjà perdus sur les sites en arrêt de production des agro-industries dans l’ensemble des deux régions.

Au plan macroéconomique, cette enquête a révélé que plus de 269 milliards F Cfa de chiffre d’affaires se sont envolés et plus de 2,153 milliards F cfa de perte, suite à la destruction de biens immobiliers, de matériels roulants et meubles. Dans le même temps, 8000 emplois relevant du secteur formel sont menacés.

Ces données résultent entre autres, des opérations « villes mortes », de l’interruption du signal d’internet décidé en janvier 2017 et qui aura duré trois mois, les attaques ciblées contre les structures économiques, ainsi que les menaces, enlèvements, rackets et assassinats des employés et responsables d’entreprises. Le Gicam avait également critiqué les décisions contre-productives prises par des autorités administratives, notamment la pose de scellés sur certains commerces. Face à cette situation qui perdure, les habitants de ces deux zones ne rêvent désormais que d’un retour à la paix.

<https://www.237online.com/cameroun-crise-anglophone-plus-de-4-000-employes-perdent-leur-emploi-dans-le-nord-ouest/>

1. **Crise anglophone : La marine camerounaise tue 17 sécessionnistes**

[**237online**](https://www.237online.com/author/237online/)7 mai 2019

 Temps de lecture 1 minute

[Pinterest](https://pinterest.com/pin/create/button/?url=https://www.237online.com/crise-anglophone-la-marine-camerounaise-tue-17-secessionnistes/&description=Crise%20anglophone%20%3A%20La%20marine%20camerounaise%20tue%2017%20s%C3%A9cessionnistes&media=https://www.237online.com/wp-content/uploads/2018/10/Bir-maritime.JPG) [Reddit](https://reddit.com/submit?url=https://www.237online.com/crise-anglophone-la-marine-camerounaise-tue-17-secessionnistes/&title=Crise%20anglophone%20%3A%20La%20marine%20camerounaise%20tue%2017%20s%C3%A9cessionnistes)

Les concernés ont été tués à la suite de l’attaque du poste avancé de Dibunda, dans le Sud-Ouest, samedi dernier. Du matériel militaire a été récupéré sur place.

La marine camerounaise a tué dix-sept combattants sécessionnistes dimanche à Dibunda (département du Ndian, région du Sud-Ouest), dans le cadre d’une opération de riposte.

Les combattants tués faisaient partie de la milice séparatiste dénommée Forces de défense de «l’Ambazonie» (Afd), dont des membres ont attaqué le poste avancé de Dibunda, dimanche.

L’attaque est survenue au cours du ravitaillement du poste militaire d’Isangele, à la sortie de la ville de Mudemba. Trois militaires ont été blessés. Ils ont été transférés à Limbe et Buea. L’un des soldats a été évacué à Douala où il a subi une amputation du bras.

Le transport des victimes vers des formations hospitalières s’est fait par voie maritime, a-t-on appris auprès des sources sécuritaires. Et pour cause, la route Mudemba-Ekondo Titi-Kumba est encore contrôlée par les sécessionnistes.

L’armée a immédiatement lancé une opération de riposte qui s’est soldée par la destruction d’un camp séparatiste en brousse. Les militaires ont récupéré sur place quatre fusils de chasse, une moto, trois groupes électrogènes, onze matelas, des tenues militaires, un drapeau «ambazonien» et un autre portant les symboles de l’Afd.

<https://www.237online.com/crise-anglophone-la-marine-camerounaise-tue-17-secessionnistes/>

1. **Cameroun – Crise Anglophone: Le jeu trouble des évêques**

[**237online**](https://www.237online.com/author/237online/)7 mai 2019

 4 minutes de lecture

[Pinterest](https://pinterest.com/pin/create/button/?url=https://www.237online.com/cameroun-crise-anglophone-le-jeu-trouble-des-eveques/&description=Cameroun%20%E2%80%93%20Crise%20Anglophone%3A%20Le%20jeu%20trouble%20des%20%C3%A9v%C3%AAques&media=https://www.237online.com/wp-content/uploads/2019/04/eglise-en-afrique.jpg) [Reddit](https://reddit.com/submit?url=https://www.237online.com/cameroun-crise-anglophone-le-jeu-trouble-des-eveques/&title=Cameroun%20%E2%80%93%20Crise%20Anglophone%3A%20Le%20jeu%20trouble%20des%20%C3%A9v%C3%AAques)

Après avoir accablé le gouvernement de critiques, exprimant à demi-mot leur soutien aux groupes armés qui sèment la terreur au Nord-Ouest et au Sud-Ouest, les prélats réunis au sein de la Conférence épiscopale du Cameroun s’indignent, désormais, de n’avoir pas été reçus par le président de la République, pour lui proposer des pistes de sortie de crise qui sévit depuis 2016 dans ces Régions.

La crise a commencé en 2016 avec des revendications d’avocats et enseignants anglophones. Ceux-ci se disaient marginalisés et dominés par le système législatif et éducatif francophone. Ces protestations ont débouché sur des grèves puis dégénéré en affrontements meurtriers entre forces de sécurité camerounaises et partisans d’une sécession des Régions du Nord-Ouest et du Sud-Ouest. Pour répondre aux sollicitations des plaignants, Paul Biya le président de la République a créé le ministère de la Décentralisation et du développement local le 2 mars 2018. Question de permettre à ses concitoyens de participer davantage à la gestion de leurs affaires, notamment au niveau local.

Le chef de l’État a aussi procédé à la création de la Commission nationale pour la promotion du bilinguisme et du multiculturalisme (Cnpbm) dans l’optique de maintenir la paix et de consolider l’unité nationale. Il a créé, le 30 novembre 2018, le Comité national de désarmement, de démobilisation et de réintégration des ex-combattants de Boko Haram et des groupes armés du Nord-Ouest et du Sud-Ouest. Le Plan d’assistance humanitaire d’urgence d’un peu plus de 12,7 milliards de FCFA lancé le 20 juin 2018, la création de la section Common Law à la Cour suprême, la réforme de l’École nationale d’administration et de magistrature et la traduction en anglais des actes Ohada font aussi parties des réponses institutionnelles du gouvernement en vue d’une résolution pacifique de la crise.

Malheureusement, les prises de position et le jeu trouble du clergé ont annihilé tous ces efforts. Preuve, en avril 2017, l’archevêque de Bamenda Cornelius Fontem Esua, son auxiliaire Michael Bibi, l’évêque du diocèse de Kumbo Georges Nkuo, et le principal du collège sacré coeur de Mankon ont été convoqués au tribunal de première instance de Bamenda. Il leur était reproché de n’avoir pas oeuvré pour la reprise des cours dans les établissements en grève. Un groupe de parents d’élèves, auteur de la plainte, réclamait 150 milliards FCFA de dommages et intérêts.

**CHRISTIAN TUMI**

Le 24 janvier 2017, le cardinal Christian Tumi, sur les ondes de Radio France internationale, a accusé le gouvernement de ne pas faire assez pour que le calme revienne en zone anglophone. «Il faut que Yaoundé dialogue», avait-il lâché dans le cadre du programme Invité d’Afrique. «La jeunesse, qui n’était pas encore sensibilisée à la réunification, commence à protester sur les conditions de travail, les conditions de vivre ensemble, et ils veulent qu’on retourne où on était au début de la réunification, c’est-àdire au fédéralisme. Le pouvoir central ne veut plus de cela. Donc c’est là où nous sommes et il y a la tension, la tension», précisait l’ancien archevêque de Douala, originaire du Cameroun anglophone.

La figure morale regrettait la tentative d’étranglement du système éducatif anglophone. «*Il y a des professeurs du Cameroun francophone qui enseignent au Cameroun anglophone, sans avoir une maitrise de l’anglais*». Quid de la justice et des autres corps de l’administration ? Réponse du Cardinal : «*Au Cameroun anglophone, on peut avoir des juges qui ne connaissent pas l’anglais et qui rendent leur jugement en français. Les gens ne comprennent rien. Prenons par exemple là où je me trouve, le préfet, le sous-préfet et le premier adjoint sont tous francophones, dans une région qui est peuplée à 99% d’anglophones*».

Et face à la fermeté du gouvernement qui veut restaurer l’ordre républicain, Christian Tumi archevêque émérite de Douala qui ne dit mot sur la mise à sac et les incendies criminels d’écoles, hôpitaux et autres édifices publics perpétrés par des partisans d’une pseudo République de l’Ambazonie s’offusque: «*Quand on réprime, ce n’est pas une solution. Il faut essayer de les convaincre, même s’il y a au noyau qui va à l’extrême pour demander la séparation totale. Les extrémistes, il y en aura toujours. Mais la majorité des anglophones veulent qu’on retourne là où on était, c’est-àdire au fédéralisme…*».

**VOLTE-FACE**

Volte-face spectaculaire ! Le 1er mai 2019, Mgr Samuel Kleda, archevêque de Douala, a, au nom de ses pairs, à l’ouverture de la 44e assemblée plénière de la Conférence épiscopale du Cameroun (Cenc), exprimé sa déception. Comme des pompiers-pyromanes, les membres du clergé demandent à rencontrer le président de la République qu’ils ont tant «*fustigé pour sa gestion de la crise anglophone*», afin de poser les bases d’un dialogue. «*Maintes fois, nous avons appelé les acteurs de la crise dans les Régions du Nord-Ouest et le Sud-Ouest pour se parler. Nous avons constitué une équipe d’évêques. Nous n’avons jamais été écoutés. Nous avons demandé à être reçus par les autorités du pouvoir. Nous n’avons jamais été reçus par la plus haute autorité de ce pays. Tout dialogue est rejeté*». A l’antipode des positions jusqu’au-boutistes de ses confrères, l’archevêque métropolitain de Yaoundé partage néanmoins la peine des frères anglophones obligés de trouver refuge dans d’autres villes du Cameroun à l’instar de Yaoundé. «*Nous saluons avec joie les voies de l’espérance que nous offre le Ressuscité. Yaoundé qui vous accueille est devenue une ville cosmopolite et surpeuplée. Plus de trois millions d’habitants. Nous sommes solidaires de ceux qui souffrent*», a souligné Mgr Jean Mbarga, à l’ouverture des 44e assises de la Cenc, à Yaoundé.

<https://www.237online.com/cameroun-crise-anglophone-le-jeu-trouble-des-eveques/>

1. **Crise anglophone au Cameroun : comment arriver aux pourparlers**

[**237online**](https://www.237online.com/author/237online/)7 mai 2019

 6 minutes de lecture

[Pinterest](https://pinterest.com/pin/create/button/?url=https://www.237online.com/crise-anglophone-au-cameroun-comment-arriver-aux-pourparlers/&description=Crise%20anglophone%20au%20Cameroun%20%3A%20comment%20arriver%20aux%20pourparlers&media=https://www.237online.com/wp-content/uploads/2018/12/bir-crise-anglophone.jpg) [Reddit](https://reddit.com/submit?url=https://www.237online.com/crise-anglophone-au-cameroun-comment-arriver-aux-pourparlers/&title=Crise%20anglophone%20au%20Cameroun%20%3A%20comment%20arriver%20aux%20pourparlers)

Le conflit dans les régions anglophones provoque une crise humanitaire majeure, avec 530 000 déplacés internes et 35 000 réfugiés au Nigéria, pour la plupart des femmes et des enfants.

International Crisis Group (ICG) est une organisation non gouvernementale indépendante et à but non lucratif qui œuvre en faveur de la prévention et de la résolution des conflits armés.

Elle est reconnue dans le monde entier comme la première organisation non gouvernementale et non partisane qui propose aux gouvernements et agences intergouvernementales telles que l’Organisation des Nations unies, l’Union européenne ou la Banque mondiale des analyses et des recommandations dans le but de prévenir et de résoudre les conflits meurtriers. Son siège est à Bruxelles (Belgique).

Au Cameroun, la crise anglophone s’est embourbée. Après vingt mois d’affrontements, 1 850 morts, 530 000 déplacés internes et des dizaines de milliers de réfugiés, le pouvoir et les séparatistes campent sur des positions inconciliables. Les séparatistes vivent dans l’utopie d’une indépendance prochaine. Le gouvernement, quant à lui, se berce d’illusions quant à la possibilité d’une victoire militaire à court terme.

Les modérés et les fédéralistes, qui bénéficient pourtant de la sympathie d’une majorité de la population, peinent à s’organiser. Pour sortir de cette impasse, les acteurs camerounais et internationaux devraient faire pression sur le gouvernement et les séparatistes. Entre la sécession voulue par les séparatistes et la décentralisation en trompe-l’œil que propose Yaoundé, des solutions médianes doivent être explorées pour conférer plus d’autonomie aux régions.

La crise sociopolitique née en octobre 2016 dans les régions anglophones du Nord-Ouest et Sud-Ouest s’est muée fin 2017 en conflit armé. Sept milices armées sont actuellement en position de force dans la majorité des localités rurales. Les forces de sécurité ont mis du temps à organiser leur riposte, mais depuis mi-2018, elles infligent des pertes aux séparatistes. Elles ne parviennent pourtant pas à reprendre entièrement le contrôle des zones rurales, ni à empêcher les attaques récurrentes des séparatistes dans les villes.

Il n’existe actuellement aucun dialogue entre Yaoundé et les séparatistes. Ces derniers exigent un débat avec l’Etat sur les modalités de la séparation, en présence d’un médiateur international. Le pouvoir refuse toute discussion sur la forme de l’Etat et la réforme des institutions. Il propose en revanche une décentralisation qui ne confère ni un financement adéquat, ni une autonomie suffisante aux collectivités territoriales décentralisées (communes et régions), et prévoit d’organiser les premières élections régionales de l’histoire du pays cette année. Loin de résoudre le conflit en cours, cette solution de façade risque au contraire de générer de nouvelles violences.

Des initiatives locales de dialogue tentent de se mettre en place. En particulier, des responsables religieux anglophones (catholique, protestant et musulman) ont annoncé en juillet 2018 un projet de conférence générale anglophone, envisagé comme une première étape avant un dialogue national inclusif. Une grande partie des anglophones y est favorable. Initialement réticents, certains séparatistes semblent à présent s’ouvrir à l’idée, à condition que la conférence débouche sur un référendum d’autodétermination qui donnerait le choix entre fédéralisme et indépendance. Mais face à l’opposition du pouvoir, les organisateurs de la conférence ont déjà dû la repousser deux fois : d’août à novembre 2018 d’abord, puis à mars 2019. Elle n’a toujours pas pu se tenir.

Si certains séparatistes se montrent intransigeants, d’autres pourraient accepter un dialogue avec l’Etat camerounais en présence d’un médiateur international, sur le fédéralisme ou une décentralisation effective, qui conférerait une autonomie et un financement adéquat aux régions, et garantirait le respect des spécificités anglophones en matière judiciaire et éducative. De même, si le gouvernement camerounais semble exclure le fédéralisme, il pourrait peut-être consentir au régionalisme ou à une décentralisation effective, qui passerait par une modification du cadre législatif.

**Discussions**

Pour ouvrir la voie à des pourparlers, les belligérants doivent faire des concessions réciproques à même de rétablir un minimum de confiance et d’enrayer la spirale de la violence. Le gouvernement devrait soutenir la conférence générale anglophone, qui devrait permettre aux anglophones de se mettre d’accord sur leurs représentants à un éventuel dialogue national tout en redonnant une voix aux anglophones non séparatistes. Dans le cadre d’un discours réconciliateur, le président camerounais devrait reconnaître l’existence du problème anglophone et la légitimité des revendications exprimées par les populations anglophones ; ordonner des enquêtes sur les abus des forces de sécurité ; prévoir des compensations pour les victimes et s’engager à reconstruire les localités détruites ; et libérer les centaines d’activistes anglophones actuellement détenus, y compris des figures importantes du mouvement séparatiste.

Les séparatistes devraient renoncer à leur stratégie de villes mortes le lundi et de boycott de l’école, et exclure de leurs rangs les combattants qui ont commis des abus contre les civils. La combinaison de pressions internes et internationales pourrait amener le gouvernement et les séparatistes à de telles concessions. Au niveau international, l’idée serait de récompenser les parties qui acceptent de modérer leurs positions et de sanctionner celles qui maintiennent une ligne plus intransigeante. L’Union européenne et les Etats-Unis, en particulier, devraient envisager des sanctions ciblées contre les pontes du pouvoir et les hauts gradés qui continuent de faire obstacle au dialogue (interdictions de voyages, gels des avoirs), et les séparatistes qui prônent ou organisent la violence (poursuites judiciaires).

**Terrain d’entente**

La procureure générale de la Cour pénale internationale devrait ouvrir des enquêtes préliminaires sur les abus des deux parties, afin de souligner que la poursuite des violences aura des conséquences judiciaires. Mais les acteurs internationaux, divisés sur la position à adopter et les mesures à prendre, doivent d’abord se mettre d’accord sur une position commune, du moins parmi les pays occidentaux. Au niveau interne, les francophones et anglophones camerounais qui prônent des solutions de compromis doivent se mobiliser pour faire pression sur les séparatistes et le gouvernement. En particulier, les fédéralistes doivent faire front commun pour peser sur les discussions.

Ils devraient continuer le dialogue avec les séparatistes pour les encourager à modérer leurs positions, et augmenter la pression sur les pouvoirs publics pour qu’ils s’ouvrent aux séparatistes prêts à un compromis. Ils doivent enfin mener une campagne internationale en faveur d’une solution pacifique à la crise. Une fois la confiance instaurée, des discussions préparatoires seront nécessaires entre émissaires du gouvernement, des fédéralistes et des séparatistes ; elles devraient avoir lieu à l’étranger. Durant ce processus, les acteurs internationaux, notamment les Etats-Unis, la Suisse, le Vatican, les Nations unies, l’Union européenne (en particulier la France, l’Allemagne et le Royaume-Uni) et l’Union africaine, doivent continuer à encourager le gouvernement au dialogue, y compris en proposant de financer et de soutenir les rencontres préparatoires. Ils pourraient aussi, au cas où un dialogue a lieu, aider à financer les compensations aux personnes victimes d’abus, la reconstruction dans les régions anglophones, le retour des réfugiés et des déplacés, et le désarmement et la démobilisation des ex combattants.

Vu le niveau d’acrimonie entre les parties, la présence d’un médiateur international sera nécessaire au cours des discussions préparatoires et lors du dialogue national. Plusieurs pays, institutions et organisations internationales ont proposé leur médiation depuis le début du conflit. Les Nations unies, l’Union africaine, l’Eglise catholique et la Suisse semblent les mieux placées pour jouer ce rôle, car les parties au conflit les perçoivent comme moins partisanes. Les discussions de fond entre les trois parties devraient se dérouler au Cameroun, ce qui exigerait des garanties de non-arrestation des représentants des séparatistes. Le gouvernement devrait, au cours de ces négociations, se montrer prêt à réviser la Constitution pour accorder une plus grande autonomie aux régions ou approfondir sensiblement le cadre légal de la décentralisation.

Ces améliorations pourraient notamment inclure l’élection des présidents des régions et des conseils régionaux au suffrage universel direct ; l’instauration d’administrations régionales disposant d’une grande autonomie financière et administrative ; et l’augmentation des compétences et des ressources des communes. Le gouvernement pourrait par ailleurs entreprendre des réformes institutionnelles et de gouvernance pour mieux prendre en compte les spécificités des systèmes éducatif et judiciaire des régions anglophones. Plus largement, le conflit en cours met en lumière les carences du modèle de gouvernance centraliste camerounais et interpelle les autorités gouvernementales sur deux préoccupations essentielles : la nécessité d’une meilleure prise en compte des minorités, des héritages coloniaux et des spécificités culturelles ; et le besoin d’une redistribution plus juste et équitable des richesses du pays. La solution pérenne réside dans le dialogue et le consensus, qui sont indispensables pour mener les réformes institutionnelles et de gouvernance dont le Cameroun a besoin.

**Impact humanitaire, social et économique**

Le conflit dans les régions anglophones provoque une crise humanitaire majeure, avec 530 000 déplacés internes et 35 000 réfugiés au Nigéria, pour la plupart des femmes et des enfants.

Enfin, le conflit a des effets dévastateurs sur l’économie des régions anglophones et de l’ensemble du pays. Les grandes entreprises d’Etat comme la Cameroon Development Corporation (CDC) et Pamol, qui emploient des dizaines de milliers de personnes dans les régions anglophones, sont en grande difficulté. Il n’existe pas de bilan exhaustif de l’impact économique du conflit, mais selon le patronat camerounais (Groupement interpatronal du Cameroun, Gicam), en juillet 2018, il avait déjà entrainé une perte de 269 milliards de francs CFA (410 millions d’euros), détruit 6 434 emplois formels, et menaçait 8 000 autres emplois.

<https://www.237online.com/crise-anglophone-au-cameroun-comment-arriver-aux-pourparlers/>

1. **Cameroun – Crise anglophone: Depuis la prison, Sissiku Ayuk Tabe dément la dissolution de son gouvernement**

[**237online**](https://www.237online.com/author/237online/)3 mai 2019

 Temps de lecture 1 minute

[Pinterest](https://pinterest.com/pin/create/button/?url=https://www.237online.com/cameroun-crise-anglophone-depuis-la-prison-sissiku-ayuk-tabe-dement-la-dissolution-de-son-gouvernement/&description=Cameroun%20%E2%80%93%20Crise%20anglophone%3A%20Depuis%20la%20prison%2C%20Sissiku%20Ayuk%20Tabe%20d%C3%A9ment%20la%20dissolution%20de%20son%20gouvernement&media=https://www.237online.com/wp-content/uploads/2019/01/ayuk-tabe-tribunal.jpg) [Reddit](https://reddit.com/submit?url=https://www.237online.com/cameroun-crise-anglophone-depuis-la-prison-sissiku-ayuk-tabe-dement-la-dissolution-de-son-gouvernement/&title=Cameroun%20%E2%80%93%20Crise%20anglophone%3A%20Depuis%20la%20prison%2C%20Sissiku%20Ayuk%20Tabe%20d%C3%A9ment%20la%20dissolution%20de%20son%20gouvernement)

Le président de la république imaginaire d’Ambazonie parle de désinformation au sujet de la dissolution de son gouvernement.

Le démenti est contenu dans un message que le leader séparatiste a rédigé depuis la prison principale de Yaoundé-Kondengui, où il est en détention provisoire. «*Un message qui m’est attribué, en circulation, parle de la dissolution du présent gouvernement intérimaire et de son cabinet. Je voudrais formellement me dissocier dudit message. Il n’est pas de moi*», a écrit Julius Sissiku Ayuk Tabe dans l’après-midi du 2 mai 2019.

Quelques heures avant son démenti, un message avait circulé dans les réseaux sociaux au sujet de la dissolution par Ayuk Tabe, du gouvernement de la république imaginaire d’Ambazonie. «[*J’informe par la présente que, jusqu’à ma libération de la prison et ma remise au pouvoir conformément à la procédure et à la volonté du peuple ambazonien, Dr Samuel Sako demeure le président intérimaire et le leader de la république fédérale d’Ambazonie*](https://www.237online.com/crise-anglophone-ayuk-tabe-dissout-lactuel-gouvernement-de-lambazonie/)», indique le leader séparatiste.

Arrêtés en janvier 2018 au Nigeria, Sissiku Ayuk Tabe et une dizaine de ses partisans sont jugés au Tribunal Militaire de Yaoundé entre autres, pour terrorisme et sécession. Des infractions passibles de la peine de mort. Les concernés disent ne pas reconnaître les juridictions camerounaises, parce que soutiennent-ils, ils ne sont pas camerounais.

<https://www.237online.com/cameroun-crise-anglophone-depuis-la-prison-sissiku-ayuk-tabe-dement-la-dissolution-de-son-gouvernement/>

1. **Franc-maçonnerie : La crise anglophone divise la Grande loge unie du Cameroun**

[**237online**](https://www.237online.com/author/237online/)3 mai 2019

 2 minutes de lecture

[Pinterest](https://pinterest.com/pin/create/button/?url=https://www.237online.com/franc-maconnerie-la-crise-anglophone-divise-la-grande-loge-unie-du-cameroun/&description=Franc-ma%C3%A7onnerie%20%3A%20La%20crise%20anglophone%20divise%20la%20Grande%20loge%20unie%20du%20Cameroun&media=https://www.237online.com/wp-content/uploads/2018/10/francmacon.jpg) [Reddit](https://reddit.com/submit?url=https://www.237online.com/franc-maconnerie-la-crise-anglophone-divise-la-grande-loge-unie-du-cameroun/&title=Franc-ma%C3%A7onnerie%20%3A%20La%20crise%20anglophone%20divise%20la%20Grande%20loge%20unie%20du%20Cameroun)

À Douala, le 20 avril dernier, les tensions sociopolitiques dans les régions du Nord-ouest et du Sud-ouest ont été le sujet segmentant lors de la réunion des « frères » du pays.

Parce que certains roulent soit pour une sécession, d’autres pour un fédéralisme ou encore pour une décentralisation plus appuyée, les «*frères maçons*» de la Grande loge unie du Cameroun (GLUC) sont divisés. Ils sont bien loin des amabilités échangées à la fin de leur réunion du 20 avril 2019 à l’hôtel Akwa Palace de Douala. Des indiscrétions bien informées, l’on apprend que ladite rencontre n’a permis ni une discussion saine, ni une délibération sereine autour de deux sujets : ce qui se passe dans les régions du Nord-ouest et du Sud-ouest du pays d’une part, et la forme de l’État d’autre part. Du haut de son rang de Grand chancelier de la GLUC, Jean Ernest Massena Ngallè Bibehè a dû se rendre compte de l’incrustation de certaines coteries au sein de ce cénacle feutré.

C’est que, rapportent nos sources, au milieu du fouillis de lectures se rapportant à la crise anglophone, deux groupes s’affrontent dans les allées de la confrérie. Les uns (chefs d’entreprises, avocats, militaires et policiers) veulent d’un débat politique en interne. Les autres, quant à eux, estiment que la GLUC se consacre exclusivement aux recherches philosophiques, ésotériques et symboliques, en même temps qu’elle «travaille» à l’élévation spirituelle de ses membres. Portant la voix des premiers pendant les assises de Douala, Norbert Kesseng pense que «*la loge devrait aider le Cameroun, qui semble passer à l’écart de la lumière et est marqué par des mois d’affrontements au Nord-ouest et au Sud-ouest, à s’en sortir et de se replacer dans le concert des nations développées*».

Le membre de la loge N°11 de Yaoundé ajoute : «Vu la montée des extrêmes, nous voulons faire des propositions sur la crise que traverse notre pays». L’homme d’affaires camerounais indique que son «groupe» évolue dans l’esprit et la lettre des 24e Rencontres humanistes et fraternelles africaines et malgaches (REHFRAM) du 1er au 7 février 2016 à Douala. Lors de cette édition, les maçons du Cameroun avaient été exhortés à agir davantage et à se prononcer sur les grands problèmes de leur pays.
En face, quelques «frères» aux profils bigarrés. Les coulisses de la réunion du 20 avril à Douala bruissent de leur mobilisation contre le projet de réfléchir sur la crise anglophone. Piqués au vif par certaines attaques, ils brandissent que «*la politique politicienne ne se discute pas en loge*».

**Lobbying**

En est-on à voir des indices ou des indicateurs susceptibles d’apparaître comme les marques d’une rupture d’époque ? Pas vraiment. Bien qu’officiellement apolitiques, les loges camerounaises sont paradoxalement des structures politiques. À ce sujet, l’hebdomadaire Jeune Afrique du 2 mars 2016 tient des exemples. En mars 2013, précise le journal, Pierre Moukoko Mbonjo, alors ministre des Relations extérieures et grand dignitaire maçon, a œuvré à l’accueil à Yaoundé de François Bozizé, ex-président centrafricain, chassé par les milices de la Séléka. Dans les mêmes colonnes, il est mentionné que le lobbying des maçons «*a parfois joué un rôle qui a permis d’atténuer la violence des conflits*».

Dans son ouvrage : «*Le Cameroun sous la dictature des loges, des sectes, du magico-anal et des réseaux mafieux : De véritables freins contre l’émergence 2035 (la logique au cœur de la performance)*», publié aux Éditions Saint-Paul en 2012, Charles Ateba Eyene (de regrettée mémoire) montre bien qu’au Cameroun, des clubs et laboratoires ésotériques, animés par des hommes de secret et de réseaux, exercent leur influence dans toutes les sphères de la société.

<https://www.237online.com/franc-maconnerie-la-crise-anglophone-divise-la-grande-loge-unie-du-cameroun/>

1. **Crise anglophone: Ayuk Tabe dissout l’actuel gouvernement de l’«ambazonie»**

[**237online**](https://www.237online.com/author/237online/)2 mai 2019

 Temps de lecture 1 minute

[Pinterest](https://pinterest.com/pin/create/button/?url=https://www.237online.com/crise-anglophone-ayuk-tabe-dissout-lactuel-gouvernement-de-lambazonie/&description=Crise%20anglophone%3A%20Ayuk%20Tabe%20dissout%20l%E2%80%99actuel%20gouvernement%20de%20l%E2%80%99%C2%ABambazonie%C2%BB&media=https://www.237online.com/wp-content/uploads/2018/10/sissiku-ayuk-tabe-arrest.jpg) [Reddit](https://reddit.com/submit?url=https://www.237online.com/crise-anglophone-ayuk-tabe-dissout-lactuel-gouvernement-de-lambazonie/&title=Crise%20anglophone%3A%20Ayuk%20Tabe%20dissout%20l%E2%80%99actuel%20gouvernement%20de%20l%E2%80%99%C2%ABambazonie%C2%BB)

Depuis sa cellule à la prison principale de Kondengui, Julius Ayuk Tabe annonce qu’il reprend la direction du gouvernement imaginaire de l’ «ambazonie».

Julius Ayuk Tabe, Nfor Ngala Nfor, Tassang Wilfried Fombang, Henry Kimeng, Cornelius Njikimbi Kwanga, Fidelis Che, Che Augustine Awasum, Egbe Ogork, Eyambe Elias et Shufai Blaise Sevidzem, reprennent les commandes du mouvement sécessionniste au Cameroun.

L’annonce y relative est contenue dans un communiqué daté du 02 mai par le président autoproclamé de l’ «ambazonie», Julius Ayuk Tabe. «Je déclare et ordonne par la présente que le cabinet des gardiens de la défense soit immédiatement dissout et que Le cabinet qui était en fonction le 5 janvier 2018, lorsque moi-même et une partie de la direction, avons été enlevés, soit reconstitué, restauré et réinstallé».

Les membres de ce gouvernement éphémère sont détenus à la prison de Yaoundé où ils attendent l’issue de leur procès au Tribunal militaire de Yaoundé. Ils sont jugés pour «terrorisme», «*sécession*», «insurrection», «*révolution»,* «*hostilité contre la patrie*», «*bande armée*», «propagation de fausses nouvelles», «*atteintes à la sureté extérieure et intérieure de l’Etat*» et «*défaut de carte nationale d’identité*».

Il leur est concrètement reproché d’avoir tenté d’affranchir, par tous les moyens, les régions du Nord-Ouest et du Sud-Ouest de l’autorité de la République du Cameroun. C’est sous leur direction que la proclamation de l’indépendance de l’ «ambazonie» s’est faite le 1er octobre 2017.

Julius Ayuk Tabe met ainsi fin à l’intérim qu’assurait, depuis février 2018, Samuel Sako, un pasteur connu pour ses positions radicales quant à la forme de l’Etat du Cameroun . Une décision, explique-t-il qui à trait à l’incapacité de ses successeurs à mener à bien le mouvement sécessionniste, à unir les peuples du Nord-Ouest et du Sud-Ouest. Ayuk Tabe leur reproche par ailleurs de graves irrégularités dans la gestion des ressources matérielles et humaines, entres autres.

<https://www.237online.com/crise-anglophone-ayuk-tabe-dissout-lactuel-gouvernement-de-lambazonie/>

1. **Cameroun – Crise anglophone: Confession d’un ancien Général ambazonien (Video)**

[**237online**](https://www.237online.com/author/237online/)2 mai 2019

 2 minutes de lecture

Bon après midi à tous. Je m’appelle Yanick Kawa Kawa.

Je viens de OKOYONG mais je suis né et j’ai grandis à Mamfe. J’étais un général dans le gouvernement internet d’Ambazonie. Je veux demander pardon pour tous les crimes que j’ai commis dans le département de la Manyu, au moins à une bonne partie de ce département. J’ai commis trop d’atrocités que vous ne pouvez même pas imaginer. La plupart de vous ici en sont victimes. J’étais le commanditaire de toutes les atrocités commises ici. J’ai assuré le succès des villes mortes ici. Je m’en chargeais personnellement de ceux qui ne respectaient pas mes ordres de villes mortes. Parfois je donnais des ordres à mes éléments de le faire à mon absence. Mon intention au départ n’était pas de devenir un Général ambazonien. On m’avait convaincu et j’ai été formé 6 mois avant le début de la crise. Malheureusement je ne voyais pas mon avenir dans ce combat et j’ai décidé de deposer les armes. Les populations, mon peuple, se plaignaient chaque jour et cela me rendais triste. J’étais en contact (en ligne, par internet) avec un monsieur qui a pris le temps de me convaincre de deposer mes armes. Je me suis rendu à la Brigade d’Intervention Rapide, BIR, et depuis lors je me sens libéré. Ceci grâce au gouvernement et à un certain monsieur dénommé Mr Genesis. Je ne l’ai jamais vu mais on est toujours en communication via le net.
Je veux dire aux populations ici présentes que nous avons réussi à commettre ces crimes parce que vous étiez de connivence avec nous. Je crois fermement que si nous tous, nous travaillons main dans la main, en trois mois au maximum, ensemble nous allons mettre fin à cette guerre inutile.
Je dis que vous êtes de connivence par ce que pour attaquer Mamfe par example il nous fallait passer au moins 3 jours dans la ville et c’est vous qui nous hébergiez. On dormait dans vos maisons sans même nous connaitre. Vos voisins nous voyaient mais n’osaient même pas lever le petit doigt. Ils avaient peur.

Moi c’est Kawa Kawa. Je connais toutes les routes et pistes dans les forêts de Mamfe. Je prie qu’on travaille main dans la main pour mettre fin à cette crise. Je souhaite aussi encourager mes frères combattants à deposer leurs armes. Le gouvernement a créé la commission de désarmement. Le gouvernement nous a tous pardonné. Les autres amba boys doivent nous suivre. C’est vrai qu’ils sont dans leurs maisons mais je souhaite qu’ils viennent le dire en public et pour qu’ils soient connus par le public. Le gouvernement leurs offrent des opportunités.
Je ne savais pas que j’allais prendre la parole ici aujourd’hui. On vient juste de me demander de prendre la parole. J’apprécie et je vous remercie. J’ai beaucoup à dire mais je ne veux pas abuser de votre temps. Je vous remercie.

<https://www.237online.com/cameroun-crise-anglophone-confession-dun-ancien-general-ambazonien-video/>

1. **Crise anglophone : Paul Biya refuse de recevoir les Évêques du Cameroun**

[**237online**](https://www.237online.com/author/237online/)2 mai 2019

 2 minutes de lecture

[Pinterest](https://pinterest.com/pin/create/button/?url=https://www.237online.com/crise-anglophone-paul-biya-refuse-de-recevoir-les-eveques-du-cameroun/&description=Crise%20anglophone%20%3A%20Paul%20Biya%20refuse%20de%20recevoir%20les%20%C3%89v%C3%AAques%20du%20Cameroun&media=https://www.237online.com/wp-content/uploads/2018/10/eveques-cenc.jpg) [Reddit](https://reddit.com/submit?url=https://www.237online.com/crise-anglophone-paul-biya-refuse-de-recevoir-les-eveques-du-cameroun/&title=Crise%20anglophone%20%3A%20Paul%20Biya%20refuse%20de%20recevoir%20les%20%C3%89v%C3%AAques%20du%20Cameroun)

La 44ème Assemblée Plénière des Évêques du Cameroun se déroule en ce moment à Yaoundé centre Jean 23 de Mvolyé.

Lebledparle a appris de l’archevêque de Douala et président sortant de la conférence épiscopale nationale du Cameroun que le Président de la République refuse de recevoir les Evêques du Cameroun pour avoir leur point de vue sur la crise anglophone.

« *Maintes fois, nous avons appelé les acteurs de la crise dans les régions du Nord-Ouest et le Sud-Ouest de se parler. Nous avons constitué une équipe d’évêques. Nous avons n’avons jamais été écroué. Nous avons demandé à être reçu par les autorités du pouvoir. Nous n’avons jamais été reçu par la plus haute autorité de ce pays. Nous nous posons donc des questions sur les dessous de ce cette crise. Des camerounais se retrouvent au Nigéria. Des citoyens vivent en cachés en forêt leur maisons ont été incendiée. Pensons aux enfants qui ne vont pas à l’école depuis trois ans. La fin des hostilités ne s’annonce pas pour demain. Tout dialogue est rejeté. Faisons notre les pleurs de Rachelle face à la perte de son enfant. La situation qui prévaut dans notre pays fait terriblement peur aux camerounais. Sachons-le, le Cameroun avant la crise. Ne sera pas le Cameroun après la crise* », a déclaré Mgr Samuel Kleda ce mercredi à l’ouverture officielle de l’assemblée plénière de la CENC.

Prenant la parole, le Nonce Apostolique du Vatican au Cameroun et en Guinée Equatoriale pense que seul le dialogue peut aboutir à une issue favorable de sortie de crise. «*Seul le dialogue peut nous faire grandir et porter des fruits en Dieu Pour cela le dialogue doit avoir une franchise*», précise Mgr Julio Murat.

Pendant son Mot de bienvenue, l’Archevêque métropolitain de Yaoundé indique qu’ils sont solidaires des frères des régions anglophones qui sont obligés de fuir pour trouver refuge dans d’autres villes du Cameroun à l’instar de Yaoundé. « Nous saluons avec joie les voies de l’espérance que nous offre le Ressusciter. Yaoundé qui vous accueillent devenue une ville cosmopolite et surpeuplé. Plus de trois millions d’habitants. Sur cette population est due entre autres aux crises qui se vit dans les régions du Nord-Ouest et le Sud-Ouest. Nous sommes solidaires de ceux qui souffrent. (…) Pour les populations de Yaoundé. Le bien commun et sa gestion et le nom de la paix », souligne Mgr Jean Mbarga.

<https://www.237online.com/crise-anglophone-paul-biya-refuse-de-recevoir-les-eveques-du-cameroun/>

1. **Crise anglophone : Fête du Travail sous fond d’effusion de sang à Tiko**

[**237online**](https://www.237online.com/author/237online/)1 mai 2019

 Moins d’une minute

[Pinterest](https://pinterest.com/pin/create/button/?url=https://www.237online.com/crise-anglophone-fete-du-travail-sous-fond-deffusion-de-sang-a-tiko/&description=Crise%20anglophone%20%3A%20F%C3%AAte%20du%20Travail%20sous%20fond%20d%E2%80%99effusion%20de%20sang%20%C3%A0%20Tiko&media=https://www.237online.com/wp-content/uploads/2019/05/mort-assassine.jpg) [Reddit](https://reddit.com/submit?url=https://www.237online.com/crise-anglophone-fete-du-travail-sous-fond-deffusion-de-sang-a-tiko/&title=Crise%20anglophone%20%3A%20F%C3%AAte%20du%20Travail%20sous%20fond%20d%E2%80%99effusion%20de%20sang%20%C3%A0%20Tiko)

Ce fut une fête du travail plutôt sanglante à Likomba, dans le département du Fako, région du Sud-Ouest.

Nos sources nous informent qu’un homme de 26 ans, connu sous le surnom de gouvernor, a été tué ce 1er mai 2019 par des soldats Camerounais, pas loin de son domicile.

La victime désarmée a été abattue dans les environs de son domicile à Tiko. Cet assassinat aurait d’après nos sources mis en colère beaucoup de ses proches. Un monsieur sans histoire, connu de tous dans la région.

<https://www.237online.com/crise-anglophone-fete-du-travail-sous-fond-deffusion-de-sang-a-tiko/>

1. **Cameroun – Crise anglophone : L’incroyable kidnapping de John FRU NDI**

[**237online**](https://www.237online.com/author/237online/)1 mai 2019

 3 minutes de lecture

[Pinterest](https://pinterest.com/pin/create/button/?url=https://www.237online.com/cameroun-crise-anglophone-lincroyable-kidnapping-de-john-fru-ndi/&description=Cameroun%20%E2%80%93%20Crise%20anglophone%20%3A%20L%E2%80%99incroyable%20kidnapping%20de%20John%20FRU%20NDI&media=https://www.237online.com/wp-content/uploads/2018/10/john-fru-ndi-cmr.jpg) [Reddit](https://reddit.com/submit?url=https://www.237online.com/cameroun-crise-anglophone-lincroyable-kidnapping-de-john-fru-ndi/&title=Cameroun%20%E2%80%93%20Crise%20anglophone%20%3A%20L%E2%80%99incroyable%20kidnapping%20de%20John%20FRU%20NDI)

En dépit de la mise au point de la direction du parti, doutes et curiosités entourent l’enlèvement et la libération du président du Social Democratic Front samedi 27 avril.

Le Social Democratic Front (SDF) n’en avait pas encore fini avec l’enlèvement de sa sénatrice la veille, suivi de sa libération quelques heures après. Que samedi 27 avril, le parti devait gérer le kidnapping de son président-fondateur, Ni John Fru Ndi. Alors que la rumeur fait le buzz sur les réseaux sociaux depuis plusieurs heures, il faudra attendra 15h49 pour que le SDF communique enfin. «*Le chairman Ni John Fru Ndi a été enlevé par des ravisseurs ce matin à Kumbo. Le président national du SDF était à la tête d’un cortège qui accompagnait la dépouille du député Joseph Banadzem, président du groupe parlementaire du SDF à l’Assemblée nationale, à sa dernière demeure. Il était en compagnie de plusieurs autres responsables du parti*», note un communiqué signé de Jean Robert Wafo, ministre du Shadow cabinet en charge de l’information et des médias. Pour un enlèvement qui a eu lieu le matin sans autre précision sur l’heure, il faut dire que la communication du SDF a perdu du temps, au point que d’autres sources l’ont grillée en annonçant l’événement de longues heures plus tôt.

La communication sur la libération de Ni John Fru Ndi entretient aussi la controverse. Mark Bareta, figure bien connue des milieux séparatistes, publie un message sur sa page Facebook à 16h07mn qui vient jeter le doute dans les esprits : « *Selon nos informations, Fru Ndi n’a pas été kidnappé. Il a été retenu pour une brève discussion alors qu’il traversait le territoire contrôlé par les combattants ambazoniens. Il a été relaxé et autorisé à poursuivre son voyage*». Il donne l’impression d’être sûr de son information, lui qui a pourtant soutenu, deux heures auparavant, que le président du SDF avait été kidnappé.

A son tour, Akere Muna annonce la libération du président du SDF à travers un tweet à 16h18 : «*Le chairman libéré. Dieu merci*». Il sera démenti à 17h50 par Jean Robert Wafo : «*Le président national du SDF Ni John Fru Ndi n’a pas été relaxé. Le tweet du bâtonnier Akere Muna est un fake au moment où il a été rendu public* ». Le membre du Shadow cabinet confirmera la libération une quarantaine de minutes plus tard : «*Le chairman Ni John Fru Ndi vient d’être libéré à 18h34*». Dans un communiqué rendu public dimanche, le SDf ne cache pas sa surprise «*de voir certaines officines hideuses annoncer bien plus tôt sa libération alors que le chairman et ses collaborateurs étaient encore en captivité et les négociations en cours*». Pas suffisant pour taire la polémique. Au contraire. Pour d’aucuns, ce kidnapping n’est en réalité qu’une mise en scène.

Surtout que dans une courte vidéo publiée quelques instants après sa libération par les Ambazoniens, on voit Ni John Fru Ndi répondant sereinement aux questions de ses ‘’ravisseurs’’, sans aucune menace. Calmement, il dit ne pas pouvoir demander à ses députés et sénateurs de déserter le Parlement, parce qu’il n’a plus le pouvoir de parler à Paul Biya comme c’était le cas par le passé. Il désigne Wirba comme celui qui est le plus à même de porter une telle doléance. Pour ne pas rassurer ceux qui nourrissent le doute sur l’enlèvement de John Fru Ndi, des sources soutiennent que ce dernier a bel et bien participé aux obsèques du député, et ne pouvait donc pas être libéré par ses ‘’ravisseurs’’ à l’heure indiquée par le communiqué du parti. Ce que dément une fois encore le SDF, qui précise que ce n’est qu’après sa libération que le chairman «*a par la suite rejoint le domicile du défunt Joseph Banadzem pour s’incliner devant sa tombe* ».

Un cadre du parti préfère aussi adhérer à la thèse du kidnapping : « *Tout est possible. Il me souvient que, de manière récurrente, les Ambazoniens demandent que les députés et sénateurs du SDF démissionnent du Parlement. Régulièrement aussi, des personnalités sont obligées de leur envoyer discrètement des contributions financières à défaut de voir leurs résidences incendiées* ». En tout cas, le 1er vice-président du SDF ne cache pas son indignation face à ce qu’il considère comme une cabale bien orchestrée contre son parti. Joshua N. Osih rappelle que le courage politique de Ni John Fru Ndi « *a conduit à l’incendie d’une partie de la résidence du président national à Ntarikon lors de notre dernier congrès, la destruction complète de sa résidence à Baba II, l’enlèvement du vice-président SDF du Sénat devant la résidence du président national, des intimidations et des menaces sur la vie à la quasi-totalité des représentants élus du SDF, le double enlèvement du frère du président national toujours en captivité ainsi que l’enlèvement plus tôt de la soeur du président national*». Pour le premier parti de l’opposition, ce lourd tribut suffit à accréditer la thèse d’un kidnapping.

<https://www.237online.com/cameroun-crise-anglophone-lincroyable-kidnapping-de-john-fru-ndi/>

1. **Cameroun – Crise anglophone: Au moins quatre militaires et des combattants séparatistes tués dans des combats à Wum (Nord-Ouest)**

[**237online**](https://www.237online.com/author/237online/)1 mai 2019

 Temps de lecture 1 minute

[Pinterest](https://pinterest.com/pin/create/button/?url=https://www.237online.com/cameroun-crise-anglophone-au-moins-quatre-militaires-et-des-combattants-separatistes-tues-dans-des-combats-a-wum-nord-ouest/&description=Cameroun%20%E2%80%93%20Crise%20anglophone%3A%20Au%20moins%20quatre%20militaires%20et%20des%20combattants%20s%C3%A9paratistes%20tu%C3%A9s%20dans%20des%20combats%20%C3%A0%20Wum%20%28Nord-Ouest%29&media=https://www.237online.com/wp-content/uploads/2019/05/militaires-camerounais-combat.jpg) [Reddit](https://reddit.com/submit?url=https://www.237online.com/cameroun-crise-anglophone-au-moins-quatre-militaires-et-des-combattants-separatistes-tues-dans-des-combats-a-wum-nord-ouest/&title=Cameroun%20%E2%80%93%20Crise%20anglophone%3A%20Au%20moins%20quatre%20militaires%20et%20des%20combattants%20s%C3%A9paratistes%20tu%C3%A9s%20dans%20des%20combats%20%C3%A0%20Wum%20%28Nord-Ouest%29)

Des combats meurtriers ont eu lieu le 30 avril entre l’armée et les séparatistes à Wum dans le département de Menchum.

Ces derniers jours ont été marqués dans les régions anglophones, par de violents combats entre l’armée et les milices qui mènent la lutte armée pour la sécession. Ces affrontements ont été particulièrement meurtriers le 30 avril 2019 dans la ville de Wum.

L’armée a en effet, pris d’assaut un camp dans lequel se trouvaient les combattants séparatistes dans cette ville, chef-lieu du département de Menchum, dans le Nord-Ouest. Des échanges de tirs ont eu lieu et selon des sources sécuritaires, plusieurs sécessionnistes ont été tués. Côté armée, au moins quatre éléments ont perdu la vie.

Depuis plusieurs jours, un regain de violence est observé dans la crise sociopolitique qui secoue les régions du Nord-Ouest et du Sud-Ouest. Surtout, vis-à-vis des forces de défense et de sécurité qui mènent la lutte contre les bandes armées pro séparatistes. Dans la matinée du 28 avril, le commissaire de police David Asoh a été abattu à Sabongari, localité située dans le département du Donga Mantung au Nord-Ouest.

En l’espace d’une semaine, deux hommes en tenue ont été tués et décapités. Il s’agit du gendarme Adam Assana, tué à Muyuka au Sud-Ouest et du soldat Arthur Banka Tah, assassiné à Wum. Des atrocités condamnées par l’ambassadeur des Etats-Unis au Cameroun, Peter Henri Barlerin. Le diplomate américain en a profité pour réitérer l’appel au cessez-feu et à l’instauration d’un dialogue inclusif.

<https://www.237online.com/cameroun-crise-anglophone-au-moins-quatre-militaires-et-des-combattants-separatistes-tues-dans-des-combats-a-wum-nord-ouest/>

1. **Crise anglophone : violents combats dans la région du Nord-ouest**

[**237online**](https://www.237online.com/author/237online/)30 avril 2019

 Moins d’une minute

[Pinterest](https://pinterest.com/pin/create/button/?url=https://www.237online.com/crise-anglophone-violents-combats-dans-la-region-du-nord-ouest/&description=Crise%20anglophone%20%3A%20violents%20combats%20dans%20la%20r%C3%A9gion%20du%20Nord-ouest&media=https://www.237online.com/wp-content/uploads/2018/12/bir-crise-anglophone.jpg) [Reddit](https://reddit.com/submit?url=https://www.237online.com/crise-anglophone-violents-combats-dans-la-region-du-nord-ouest/&title=Crise%20anglophone%20%3A%20violents%20combats%20dans%20la%20r%C3%A9gion%20du%20Nord-ouest)

Des hommes armés et des soldats tués dans des accrochages à Wum.

Lundi 30 avril, dans la région du Nord-ouest du Cameroun, l’armée a pris d’assaut un camp dans lequel était retranchés des séparatistes.

D’après des sources, plusieurs hommes armés ont été tués, tandis que l’armée enregistrait au moins quatre morts dans ses rangs.

Des informations font également état d’une attaque de l’armée à Echuan 24h plus tôt. Attaque aux cours de laquelle deux combattants sécessionnistes ont été tués.

<https://www.237online.com/crise-anglophone-violents-combats-dans-la-region-du-nord-ouest/>

1. **Cameroun – Crise anglophone: Le régime de Paul Biya cherche-t-il à banaliser le kidnapping de John Fru Ndi ?**

[**237online**](https://www.237online.com/author/237online/)29 avril 2019

 2 minutes de lecture

[Pinterest](https://pinterest.com/pin/create/button/?url=https://www.237online.com/cameroun-crise-anglophone-le-regime-de-paul-biya-cherche-t-il-a-banaliser-le-kidnapping-de-john-fru-ndi/&description=Cameroun%20%E2%80%93%20Crise%20anglophone%3A%20Le%20r%C3%A9gime%20de%20Paul%20Biya%20cherche-t-il%20%C3%A0%20banaliser%20le%20kidnapping%20de%20John%20Fru%20Ndi%20%3F&media=https://www.237online.com/wp-content/uploads/2019/04/fru.jpg) [Reddit](https://reddit.com/submit?url=https://www.237online.com/cameroun-crise-anglophone-le-regime-de-paul-biya-cherche-t-il-a-banaliser-le-kidnapping-de-john-fru-ndi/&title=Cameroun%20%E2%80%93%20Crise%20anglophone%3A%20Le%20r%C3%A9gime%20de%20Paul%20Biya%20cherche-t-il%20%C3%A0%20banaliser%20le%20kidnapping%20de%20John%20Fru%20Ndi%20%3F)

Le SDF accuse des pontes du régime d’instrumentaliser une partie de la presse pour faire croire que le kidnapping de John Fru Ndi est une mise en scène.

L’on assiste à une véritable déferlante médiatique sur Ni John Fru Ndi ce lundi 29 avril 2019. En revenant sur les évènements du week-end dernier à Kumbo, plusieurs journaux soutiennent que le kidnapping du leader du Social Democratic Front (SDF) est une mise en scène.

Cameroon-info a opéré une sélection de quelques titres pour illustrer cette situation: «*Crise anglophone: Le vrai-faux enlèvement du Chairman*», lit-on en grande en Une du journal L’indépendant. L’hebdomadaire affirme que «*le flou artistique entretenu autour de ce kidnapping, interroge sur les motivations réelles*».

Même son de cloche chez l’hebdomadaire La Nouvelle qui titre: «*Kidnapping, John Fru Ndi fait sa rentrée politique*». Notre confrère croit savoir que cet enlèvement a été orchestré pour remettre l’opposant sous les coups des projecteurs, après une élection présidentielle à l’issue de laquelle le candidat du SDF a obtenu un faible score.

Même le très sérieux Mutations s’y met. «*Rapt éclair, clair-obscur*», c’est le titre qui barre la Une de ce quotidien privé ce jour. Le journal note que la polémique enfle autour du kidnapping de Fru Ndi, les auteurs et les circonstances de la libération.

Dans un communiqué signé le 28 avril 2019, le premier vice-président du SDF dénonce ce que qu’il qualifie manipulation de l’opinion. Joshua Osih affirme qu’«*il nous est revenu qu’une réunion d’urgence s’est tenue dans la nuit de samedi à dimanche à Yaoundé entre un haut commis de l’État, des pontes du parti-Etat et des patrons de presse à l’effet de banaliser ou tourner en dérision l’enlèvement du chairman Ni John Fru Ndi, comme si le parti avait besoin d’attendre l’enterrement de deux de ses cadres à Kumbo et à Douala pour procéder à une telle ignominie. Des journaux montés et achetés seront mis à contribution pour verser dans le dénigrement puisqu’ils ne sont pas à leur première commande passée dans ce sens*», dénonce Joshua Osih.

«*La commande à coups de billets de banque ne saurait justifier des publications odieuses qui ternissent l’image du noble métier de journaliste. Ainsi que l’activité de la presse en général. Le peuple camerounais ne sera de toute évidence pas surpris des dictées préparées de ces journaux dans leurs parutions de début de semaine prochaine*», indique le communiqué de Joshua Osih.

<https://www.237online.com/cameroun-crise-anglophone-le-regime-de-paul-biya-cherche-t-il-a-banaliser-le-kidnapping-de-john-fru-ndi/>

1. **Crise anglophone au Cameroun : John Fru Ndi libéré après quelques heures de captivité**

[**237online**](https://www.237online.com/author/237online/)27 avril 2019

 Temps de lecture 1 minute

[Pinterest](https://pinterest.com/pin/create/button/?url=https://www.237online.com/crise-anglophone-au-cameroun-john-fru-ndi-libere-apres-quelques-heures-de-captivite/&description=Crise%20anglophone%20au%20Cameroun%20%3A%20John%20Fru%20Ndi%20lib%C3%A9r%C3%A9%20apr%C3%A8s%20quelques%20heures%20de%20captivit%C3%A9&media=https://www.237online.com/wp-content/uploads/2019/04/John-Fru-Ndi-libre.jpg) [Reddit](https://reddit.com/submit?url=https://www.237online.com/crise-anglophone-au-cameroun-john-fru-ndi-libere-apres-quelques-heures-de-captivite/&title=Crise%20anglophone%20au%20Cameroun%20%3A%20John%20Fru%20Ndi%20lib%C3%A9r%C3%A9%20apr%C3%A8s%20quelques%20heures%20de%20captivit%C3%A9)

L’opposant camerounais John Fru Ndi, président du Social Democratic Front (SDF), a été libéré quelques heures après avoir été enlevé, samedi 27 avril, par des individus non identifiés soupçonnés d’être des ambas boys, alors qu’il se rendait dans la ville de Kumbo.

Joh Fru Ndi est libre. Le leader du Social Democratic Front (SDF) a recouvré la liberté après avoir été retenu en otage pendant quelques heures par des individus non identifiés, a appris Jeune Afrique auprès de plusieurs responsables de son parti. « *Fru Ndi a été kidnappé alors qu’il se rendait à l’enterrement du député Joseph Banadzem à Kumbo*», nous a indiqué un cadre du SDF.

Selon des sources locales, l’opposant historique au président Paul Biya était à la tête d’un convoi d’une dizaine de véhicules lorsque des individus armés les ont interceptés, contraignant le leader du SDF à les suivre.

Flou sur l’identité des ravisseurs

Quelques heures plus tôt, une messe s’était tenue au domicile de John Fru Ndi à Ntarinkong, en mémoire du disparu. Au cours de l’oraison funèbre, l’opposant avait assuré que le regretté Joseph Banadzem, décédé le 30 mars dernier, devait être « enterré avec dignité ». Il a ainsi indiqué qu’il se rendrait personnellement à Kumbo, dans le nord-ouest du pays, malgré les menaces proférées par les groupes séparatistes.

«*Ils ont annoncé qu’aucun étranger ne devait venir à Kumbo pour cet enterrement. Seuls les ressortissants de la ville et les membres de la famille étaient autorisés à s’y rendre* », indique une source proche de la famille.

L’identité des ravisseurs demeure floue, mais pour certains les coupables semblent tout trouvés. « *Ce sont certainement les milices séparatistes*», a confié le député Joshua Osih, joint par Jeune Afrique.

<https://www.237online.com/crise-anglophone-au-cameroun-john-fru-ndi-libere-apres-quelques-heures-de-captivite/>

1. **Cameroun – Crise Anglophone et Boko Haram: Le message de paix de Aurélien Chedjou**

[**237online**](https://www.237online.com/author/237online/)25 avril 2019

 Temps de lecture 1 minute

Pour le peuple camerounais ce serait mieux qu’on s’arrête pour faire l’état des lieux un moment.

Et savoir que ceci n’est profitable pour personne. Que ce soit la situation avec Boko Haram, que ce soit la situation dans les zones anglophones. je vous en prix mes chers frères faisons la paix. C’est notre richesse la paix au Cameroun. toutes les tributs que ce soit du Nord au Sud, de l’Est à l’Ouest nous sommes tous camerounais.

Posons les armes pour ceux qui en ont. C’est vrai que nous on le vit de très loin parce qu’on est à Douala ou alors en Europe, mais je peux vous rassurer que on n’est touché. J’espère par mon humble voix que ça pourra faire échos la ou il faut et que nous retrouvions le Cameroun qu’on n’a toujours connu.

Vive le Cameroun, Vive le vert rouge jaune, Vive le 237

**Source:** [Je dors deux nuits chez Aurélien Chedjou !](https://www.youtube.com/watch?v=qPJcFr4qH_0&) *Champion de France avec le LOSC en 2011, le défenseur central camerounais fait découvrir son quotidien en Turquie où il évolue depuis 2013.*

<https://www.237online.com/cameroun-crise-anglophone-et-boko-haram-le-message-de-paix-de-aurelien-chedjou/>

1. **Cameroun – Crise anglophone: Un officier de la gendarmerie décapitée par les séparatistes à Muyuka**

[**237online**](https://www.237online.com/author/237online/)25 avril 2019

 Temps de lecture 1 minute

Du corps de Assana Adama, il ne reste que quelques parties décapités au bord d’une route de la ville de Muyuka, près d’un caniveau.

C’est là que la dépouille démembrée du jeune officier de la gendarmerie en service dans la même localité, accusé d’avoir tué un s*e*xagénaire le 3 avril dernier alors qu’il se trouvait seul chez lui et dont il accusait d’être en connivence avec les groupes armés sécessionnistes.

La macabre découverte a été faite aux premières heures de mercredi (24/04/2019 , Ndlr) et aucun groupe n’a pour l’instant revendiqué cet assassinat.

Selon des sources, l’officier gendarme Assana Adam, originaire de la région de l’extrême nord, se trouvait à bord d’un car de transport en commun en direction de Kumba. Il a été enlevé autour de 22 heures 30 minutes par des populations, puis torturé, décapité et démembré au petit matin de mercredi à hauteur de Kwe Kwe – Muyuka..

Des morceaux de son corps ont été éparpillés sur la route principale, ce qui a provoqué la panique parmi les habitants qui sont restés cloîtrés chez eux, craignant une répression.

Des sources affirment que des soldats sont descendus sur les lieux dans la journée d’hier pour nettoyer la route et emporter les restes du corps de ce gendarme

Il faut souligner que dans les régions anglophones du Cameroun, les affrontements entre les forces de l’ordre et les groupes armés sont devenus quasi quotidiens

Plus de 200 membres des forces de défense et de sécurité camerounaises ont perdu la vie dans ce conflit ainsi que plus de 500 civils, selon le groupe d’analyse International Crisis Group.

Ce conflit, qui n’a cessé de prendre de l’ampleur, a déjà forcé plus de 437.000 personnes à fuir leur domicile dans ces régions, selon l’ONU.

<https://www.237online.com/cameroun-crise-anglophone-un-officier-de-la-gendarmerie-decapitee-par-les-separatistes-a-muyuka/>

1. **Cameroun – Crise anglophone/Adolphe Lele Lafrique: «Certains fonctionnaires profitent de la crise pour se rendre coupables de détournement de deniers publics»**

[**237online**](https://www.237online.com/author/237online/)22 avril 2019

 Temps de lecture 1 minute

[Pinterest](https://pinterest.com/pin/create/button/?url=https://www.237online.com/cameroun-crise-anglophone-adolphe-lele-lafrique-certains-fonctionnaires-profitent-de-la-crise-pour-se-rendre-coupables-de-detournement-de-deniers-publics/&description=Cameroun%20%E2%80%93%20Crise%20anglophone%2FAdolphe%20Lele%20Lafrique%3A%20%C2%ABCertains%20fonctionnaires%20profitent%20de%20la%20crise%20pour%20se%20rendre%20coupables%20de%20d%C3%A9tournement%20de%20deniers%20publics%C2%BB&media=https://www.237online.com/wp-content/uploads/2018/10/Adolphe-Lele-Lafrique-2.jpg) [Reddit](https://reddit.com/submit?url=https://www.237online.com/cameroun-crise-anglophone-adolphe-lele-lafrique-certains-fonctionnaires-profitent-de-la-crise-pour-se-rendre-coupables-de-detournement-de-deniers-publics/&title=Cameroun%20%E2%80%93%20Crise%20anglophone%2FAdolphe%20Lele%20Lafrique%3A%20%C2%ABCertains%20fonctionnaires%20profitent%20de%20la%20crise%20pour%20se%20rendre%20coupables%20de%20d%C3%A9tournement%20de%20deniers%20publics%C2%BB)

Le patron de la région du Nord-Ouest demande à toutes les autorités de son territoire de commandement de rationaliser les dépenses.

Adolphe Lele Lafrique accuse. Au cours d’une séance de travail qu’il a présidée en fin de semaine dernière à Bamenda, le gouverneur de la région du Nord-Ouest a soutenu que des fonctionnaires détournent de l’argent public, sous le prétexte de la crise anglophone. «*Certains fonctionnaires profitent de la crise pour se rendre coupables de détournement de deniers publics, certains gagnent un salaire sans travailler*», a fustigé le gouverneur, sans être plus explicite.

A la suite de cette dénonciation, le patron du Nord-Ouest a instruit les autorités de sa région de rationaliser les dépenses en fonction des besoins réels des usagers. «*C’est pour cette région que j’ai instruit l’inspecteur général, toutes les autorités administratives et les services financiers de veiller à ce que les dépenses effectuées répondent aux demandes des usagers du service public*», a-t-il indiqué. Lele Lafrique brandit la menace pour dissuader d’éventuels contrevenants. «Faute de quoi, ils se verront sanctionnés», a-t-il prévenu.

Le numéro 1 de la région du Nord-Ouest en a profité pour répondre aux informations données par des ONG, faisant état d’un risque élevé de crise alimentaire dans les régions anglophones. «*Même si la situation est difficile, nous ne pouvons pas encore conclure à une insécurité alimentaire dans la région du Nord-Ouest*», a-t-il réagi.

Dans un rapport publié en début d’année, l’USAID (agence des Etats-Unis pour le développement international) a prédit qu’entre mars et mai 2019, environ 1,4 million de personnes seront en situation d’insécurité alimentaire dans les régions du Nord-Ouest et du Sud-Ouest, ainsi que l’Ouest voisine. L’organisme précise que l’équivalent de 7% de la population des trois régions sus citées, soit environ 486 000 personnes, sera confronté à une crise alimentaire au cours de la même période.

<https://www.237online.com/cameroun-crise-anglophone-adolphe-lele-lafrique-certains-fonctionnaires-profitent-de-la-crise-pour-se-rendre-coupables-de-detournement-de-deniers-publics/>

1. **Cameroun-Crise Anglophone: le proviseur du lycée de Ngomgham kidnappé**

[**237online**](https://www.237online.com/author/237online/)20 avril 2019

 Temps de lecture 1 minute

Une enseignante, proviseur du lycée bilingue de Ngomghan, banlieue de Bamenda, la capitale de la région du Nord-Ouest en conflit, et un employé de l’établissement ont été enlevés.

Madame Nkengla Felicitas Mengwi, proviseur dudit lycée a été kidnappée vers 11 h 30 le mercredi 17 avril 2019 sur le campus et transférée vers une destination inconnue.

Les hommes armés sont arrivés à l’école à vélo, ont tiré deux coups en l’air avant d’enlever le proviseur et un vigile. Ils ont tous été conduits vers une destination inconnue sur des motos.

Pour l’heure, aucune information n’a été donnée sur l’identité des assaillants. Par contre, les familles et les amis des personnes kidnappées sont inquiets par la situation

« *Nous notons que ces actes ont pour but d’intimider, de créer la peur et la panique parmi le personnel et les élèves, et de perturber le bon fonctionnement de l’année scolaire*», indique un enseignant de la dite institution qui a requis l’anonymat

Dans les deux régions anglophones du Nord-Ouest et du Sud-Ouest du Cameroun, une crise socio-politique sans précédent s’est installée fin 2016. Elle s’est transformée fin 2017 en conflit armé.

Des affrontements entre armée et séparatistes, regroupés en groupes épars dans la forêt, s’y produisent quasiment tous les jours depuis plusieurs mois.

Les séparatistes ont décrété un boycott des établissements scolaires, estimant que le système scolaire francophone marginalise les étudiants anglophones.

Les attaques de séparatistes armés contre des écoles sont nombreuses depuis le début du conflit.

Selon des sources concordantes, aux séparatistes armés se sont ajoutés des bandes armées qui rackettent les populations et les entreprises.

<https://www.237online.com/cameroun-crise-anglophone-le-proviseur-du-lycee-de-ngomgham-kidnappe/>

1. **Cameroun – Crise Anglophone: 31 ex-combattants séparatistes déposent les armes**

[**237online**](https://www.237online.com/author/237online/)19 avril 2019

 Temps de lecture 1 minute

[Pinterest](https://pinterest.com/pin/create/button/?url=https://www.237online.com/cameroun-crise-anglophone-31-ex-combattants-separatistes-deposent-les-armes/&description=Cameroun%20%E2%80%93%20Crise%20Anglophone%3A%2031%20ex-combattants%20s%C3%A9paratistes%20d%C3%A9posent%20les%20armes&media=https://www.237online.com/wp-content/uploads/2019/04/separatiste-secessionniste-anglophone.jpg) [Reddit](https://reddit.com/submit?url=https://www.237online.com/cameroun-crise-anglophone-31-ex-combattants-separatistes-deposent-les-armes/&title=Cameroun%20%E2%80%93%20Crise%20Anglophone%3A%2031%20ex-combattants%20s%C3%A9paratistes%20d%C3%A9posent%20les%20armes)

Ils ont été reçus au Centre régional de désarmement, de démobilisation et de réintégration du Nord-ouest à Bamenda où ils suivent désormais le processus de réintégration.

Selon le coordonnateur du Centre régional de désarmement, de démobilisation et de réintégration (ddr) du Nord-Ouest à Bamenda, 25 garçons et six filles, soit un total de 21 ex-combattants des milices séparatistes qui sèment la terreur dans les régions du Sud-Ouest et Nord-Ouest du Cameroun, ont été reçus dans ledit centre. Ces jeunes ont décidé de déposer les armes et de reprendre une vie normale loin de leurs anciens compagnons, qui continuent de dicter leur loi dans cette partie du Cameroun. Ces chiffres ont été révélés au terme du premier conclave d’évaluation des quatre mois d’activités du DRR, présidé par le gouverneur de la région du Nord-Ouest, Adolph Lele Lafrique.

Selon Gabsa Nyagha Sistux, le coordonnateur de ce Centre, dans une interview accordée à la Crtv radio, le nombre des pensionnaires augmente au quotidien. « Nous avons été informés, qu’il y a encore trois ex-combattants qui sont encore au Service général, que nous irions récupérer incessamment », explique-t-il. Cette réunion a permis au centre non seulement de dresser son bilan d’activité depuis sa création, mais également de présenter les problèmes auxquels le personnel est confronté. « *J’en appelle à la Communauté régionale, à tous et à chacun, de se remobiliser derrière le Chef de l’Etat pour demander à nos jeunes, dont certains sont encore dans les brousses, de rejoindre le camp Ddr parce qu’ils y seront bien reçus, encadrés, formés et aucune suite judiciaire ne viendra perturber leur réinsertion* », relève le gouverneur de cette région en proie à une crise sociopolitique, dite « anglophone », depuis près de trois ans.

Crée le 30 novembre 2018 par le Président de la République du Cameroun, Paul Biya, la mission du Cnddr est d’organiser, d’encadrer et de gérer le désarmement, la démobilisation et la réinsertion de ceux qui désirent répondre favorablement à l’offre de paix du chef de l’Etat en déposant les armes. Il s’intéresse autant aux groupes armés des régions du Nord- Ouest et du Sud-Ouest qu’aux ex-combattants de Boko-Haram.

<https://www.237online.com/cameroun-crise-anglophone-31-ex-combattants-separatistes-deposent-les-armes/>

1. **Cameroun – Crise anglophone: le Canada apporte plus de 2 milliards francs CFA**

[**237online**](https://www.237online.com/author/237online/)17 avril 2019

 Temps de lecture 1 minute

Ottawa envoie sa sous-ministre adjointe pour l’Afrique subsaharienne rencontrer les autorités camerounaises.

Le Canada souhaite être un ami et un partenaire du peuple camerounais sur le chemin du dialogue, de la paix durable et du développement économique et social pour tous. Tel est le message porté par madame Leslie Norton, sous-ministre adjointe pour l’Afrique subsaharienne d’Affaires mondiales Canada, lors de sa visite au Cameroun. Pendant son séjour, elle a rencontré personnalités, membres de la société civile et entrepreneurs camerounais.

Accompagnée de la haut-commissaire du Canada au Cameroun, Leslie Norton a échangé avec le Premier ministre camerounais, Joseph Dion Ngute, représentant personnel du chef de l’Etat. Au cours de l’entretien, elle a transmis les préoccupations de son pays. Il en ressort que, le Canada est préoccupé par la violence qui perdure dans les régions du Nord-Ouest et du Sud-Ouest et par son impact sur les populations ; sans oublier les répercussions sur la situation actuelle des droits civils et politiques au Cameroun.

Pour illustrer ce désir de participer au processus de règlement du conflit anglophone, le Canada envisage offrir un soutien financier au Cameroun. Il est question d’apporter 6,65 millions de dollars canadiens (plus de 2 milliards francs CFA), en aide humanitaire, pour l’année 2019. Le financement est destiné à répondre aux besoins urgents des populations touchées par le conflit dans les régions du Nord-Ouest et du Sud-Ouest, et qui inclue les besoins spécifiques des femmes et des filles.

La rencontre avec le chef de gouvernement camerounais a également fait l’objet d’une discussion productive sur les défis et les priorités du gouvernement camerounais et sur l’engagement soutenu et multiforme du Canada au Cameroun.

Avant de retourner dans son pays le Canada, Leslie Norton a aussi rencontré des partenaires humanitaires du Canada, des membres de la communauté diplomatique ainsi que des représentants de la société civile, incluant des acteurs économiques et des défenseurs des droits de la personne. C’est donc bien informée sur la situation sociopolitique du Cameron que la sous-ministre adjointe pour l’Afrique subsaharienne d’Affaires mondiales Canada, a repris les airs, le 12 avril dernier.

<https://www.237online.com/cameroun-crise-anglophone-le-canada-apporte-plus-de-2-milliards-francs-cfa/>

1. **Cameroun – Crise Anglophone : Paul Biya pourrait ouvrir un dialogue avec les sécessionnistes**

[**237online**](https://www.237online.com/author/237online/)16 avril 2019

 Temps de lecture 1 minute

[Pinterest](https://pinterest.com/pin/create/button/?url=https://www.237online.com/cameroun-crise-anglophone-paul-biya-pourrait-ouvrir-un-dialogue-avec-les-secessionnistes/&description=Cameroun%20%E2%80%93%20Crise%20Anglophone%20%3A%20Paul%20Biya%20pourrait%20ouvrir%20un%20dialogue%20avec%20les%20s%C3%A9cessionnistes&media=https://www.237online.com/wp-content/uploads/2018/10/paul-biya-election-2018-237online.jpg) [Reddit](https://reddit.com/submit?url=https://www.237online.com/cameroun-crise-anglophone-paul-biya-pourrait-ouvrir-un-dialogue-avec-les-secessionnistes/&title=Cameroun%20%E2%80%93%20Crise%20Anglophone%20%3A%20Paul%20Biya%20pourrait%20ouvrir%20un%20dialogue%20avec%20les%20s%C3%A9cessionnistes)

L’information émane d’une source très introduite du journal français Le Monde.

La crise anglophone a pris le visage d’une sale guerre à huis clos, avec son lot d’exactions, de villages détruits, de complices supposés d’un camp ou de l’autre exécutés, de racket des rares entrepreneurs encore actifs dans la zone et d’enlèvements contre rançons.

Selon l’ONU, 437 000 personnes ont été déplacées à l’intérieur du pays par le conflit et 32 000 autres sont parties se réfugier au Nigeria.

Une situation qui est devenue très préoccupante pour les chancelleries occidentales. En effet, A en croire le journal français Le Monde, des négociations, secrètes afin de préserver l’orgueil des deux camps, pourraient s’ouvrir à une date et dans un lieu encore inconnus. « *Les pays occidentaux sont exaspérés par le niveau de violence des forces camerounaises et, si Yaoundé refuse de dialoguer, les Américains envisagent des sanctions individuelles contre des personnalités du pouvoir*« , confie au quotidien français une personnalité investie sur ce dossier.

Cette dernière relate par ailleurs que les autorités camerounaises pourraient désormais ne plus bénéficier du parapluie protecteur de Paris : « *La France, qui a toujours été favorable au gouvernement, est embarrassée. Après sa réélection, Biya a fait croire aux Français à un remaniement gouvernemental en profondeur, d’où les faucons seraient exclus, et à la création d’une commission indépendante pour entourer des négociations avec les anglophones. La France a alors fait du lobbying pour freiner les chancelleries qui étaient sur une ligne plus dure. Mais force est de constater que le pouvoir a roulé les Français dans la farine*« .

<https://www.237online.com/cameroun-crise-anglophone-paul-biya-pourrait-ouvrir-un-dialogue-avec-les-secessionnistes/>

1. **Crise anglophone : Pourquoi les leaders séparatistes boycottent leur procès**

[**237online**](https://www.237online.com/author/237online/)15 avril 2019

 2 minutes de lecture

[Pinterest](https://pinterest.com/pin/create/button/?url=https://www.237online.com/crise-anglophone-pourquoi-les-leaders-separatistes-boycottent-leur-proces/&description=Crise%20anglophone%20%3A%20Pourquoi%20les%20leaders%20s%C3%A9paratistes%20boycottent%20leur%20proc%C3%A8s&media=https://www.237online.com/wp-content/uploads/2019/04/leaders-separatistes-sisiku-ayuk-tabe.jpg) [Reddit](https://reddit.com/submit?url=https://www.237online.com/crise-anglophone-pourquoi-les-leaders-separatistes-boycottent-leur-proces/&title=Crise%20anglophone%20%3A%20Pourquoi%20les%20leaders%20s%C3%A9paratistes%20boycottent%20leur%20proc%C3%A8s)

Sisiku Ayuk Tabe et ses coaccusés exigent qu’une décision de la cour d’appel relative à leur statut de réfugiés soit rendue, avant toute poursuite de la procédure.

Il n’a fallu que quelques minutes au juge Jacques Baudouin Misse Njone, magistrat auprès du tribunal militaire de Yaoundé, pour constater l’absence des leaders de l’autoproclamée « République d’Ambazonie » et de leurs conseillers à l’audience du 8 avril. Après s’être entendu avec le commissaire du gouvernement, le juge a ainsi ordonné le report de la session au 29 avril prochain. A l’annonce de cette décision, les membres des familles et proches des accusés, venus en nombre au tribunal militaire, ont appris, en coulisse, que la défense avait choisi de boycotter cette audience. Le motif avancé : de nombreux vices de procédure auraient été tolérés par la cour, selon eux.

**Procédure en appel**

Les raisons de ce boycott remontent au 29 mars dernier, date de la dernière audience. Au cours de celle-ci, les avocats de Sisiku Ayuk Tabe, président éphémère de la République d’Ambazonie, et ses 9 coaccusés avaient manifesté pendant plusieurs heures leur mécontentement devant la cour, exigeant notamment que le procès reprenne de zéro. Ce qu’a refusé le juge Jacques Baudouin Misse Njone, qui assistait à sa première audience dans cette affaire, après le départ de son collègue Michel Mem. « *L’ancien président du tribunal [M. Michel Mem, Ndlr.] avait rendu un jugement d’avant dire droit que nous avons attaqué en appel*», a expliqué Me Christopher Ndong, avocat de la défense, faisant référence à la décision déclarant le tribunal militaire de Yaoundé compétent pour juger les leaders sécessionnistes, bien qu’ils aient renié la nationalité camerounaise et clamé être des réfugiés. «*La loi est pourtant claire, a précisé Me Fru Johnson, leader du collège d’avocats de la défense. Lorsqu’on attaque un jugement d’avant dire droit en appel, on sursoit au dossier tel qu’il est à cet l’instant. Nous ne pouvons pas poursuivre le procès comme si de rien n’était, alors que nous avons un jugement en appel et qu’une décision n’a pas encore été rendue. Si la décision nous est favorable, tout ce que nous faisons ici n’aura été qu’une perte de temps* », a-t-il ajouté.

Des arguments balayés par le commissaire du gouvernement, qui a expliqué à la cour que l’attente d’une décision n’empêchait en rien de poursuivre les débats, indiquant que les avocats «*cherchaient à perdre du temps*». «*Pourquoi sont-ils pressés ?, s’est ainsi insurgé Me Christopher Ndong, également secrétaire général du MRC de Maurice Kamto. Ces accusés encourent la prison à vie. Nous devons utiliser tous les moyens pour les défendre face à des accusations qui ne tiennent pas en droit. C’est tout* ».

<https://www.237online.com/crise-anglophone-pourquoi-les-leaders-separatistes-boycottent-leur-proces/>

1. **Cameroun-Crise anglophone: Six élèves ont été enlevés à Fongo-Tongo**

[**237online**](https://www.237online.com/author/237online/)15 avril 2019

 Temps de lecture 1 minute

[Pinterest](https://pinterest.com/pin/create/button/?url=https://www.237online.com/cameroun-crise-anglophone-six-eleves-ont-ete-enleves-a-fongo-tongo/&description=Cameroun-Crise%20anglophone%3A%20Six%20%C3%A9l%C3%A8ves%20ont%20%C3%A9t%C3%A9%20enlev%C3%A9s%20%C3%A0%20Fongo-Tongo&media=) [Reddit](https://reddit.com/submit?url=https://www.237online.com/cameroun-crise-anglophone-six-eleves-ont-ete-enleves-a-fongo-tongo/&title=Cameroun-Crise%20anglophone%3A%20Six%20%C3%A9l%C3%A8ves%20ont%20%C3%A9t%C3%A9%20enlev%C3%A9s%20%C3%A0%20Fongo-Tongo)

Six élèves – cinq garçons et une fille – d’une école secondaire publique ont été kidnappés à Fongo Tongo, dans le département de la Menoua, région de l’ouest du Cameroun, a annoncé vendredi un responsable de l’administration.

«*Les enfants ont été kidnappés, alors qu’ils aidaient leurs parents en agriculture. Nous n’avons aucune idée du lieu où ils se trouvent depuis leur enlèvement. Les ravisseurs ont d’abord demandé une rançon, mais n’ont plus contacté la famille lorsqu’ils se sont rendus compte qu’ils ne pourraient pas payer*», a déclaré à la presse Amiya Balise Ndongana, administrateur, accusant les séparatistes armés d’être responsables de l’enlèvement.

Fongo Tongo est située à la frontière avec la région du Nord-ouest, où les séparatistes et forces gouvernementales s’affrontent.

C’est la première fois que des étudiants sont kidnappés dans une région frontalière francophone, depuis que les séparatistes ont pris les armes en novembre 2017.

«Ils ont attaqué cette partie du pays par le passé, alors nous savons qu’ils ont enlevé les enfants. Les forces de défense et de sécurité ont lancé une enquête approfondie sur les enfants et nous espérons qu’ils seront sauvés en toute sécurité », a-t-il déclaré.

Les séparatistes n’ont pas revendiqué l’enlèvement. Depuis la fin de l’année dernière, des étudiants ont été constamment enlevés puis relâchés dans la partie anglophone du Cameroun, par des séparatistes radicaux.

<https://www.237online.com/cameroun-crise-anglophone-six-eleves-ont-ete-enleves-a-fongo-tongo/>

1. **Cameroun-Crise anglophone: Un autre militaire tué par les séparatistes ?**

[**237online**](https://www.237online.com/author/237online/)15 avril 2019

 Moins d’une minute

[Pinterest](https://pinterest.com/pin/create/button/?url=https://www.237online.com/cameroun-crise-anglophone-un-autre-militaire-tue-par-les-separatistes/&description=Cameroun-Crise%20anglophone%3A%20Un%20autre%20militaire%20tu%C3%A9%20par%20les%20s%C3%A9paratistes%20%3F&media=https://www.237online.com/wp-content/uploads/2018/10/soldat-mort-au-combat.jpg) [Reddit](https://reddit.com/submit?url=https://www.237online.com/cameroun-crise-anglophone-un-autre-militaire-tue-par-les-separatistes/&title=Cameroun-Crise%20anglophone%3A%20Un%20autre%20militaire%20tu%C3%A9%20par%20les%20s%C3%A9paratistes%20%3F)

Le corps d’un homme non identifié et vêtu d’une tenue militaire a été découvert samedi matin à Bambui, dans le nord-ouest du Cameroun.

Les habitants disent que ce corps retrouvé aurait été jeté là par des combattants présumés séparatistes.

Ils ajoutent que des coups de feu ont été entendus vendredi soir lors des affrontements intenses entre force de sécurité et combattants séparatistes.

Selon certaines sources, le corps retrouvé aurait résulté de cet affrontement. Mais l’armée n’a pas encore annoncé ni confirmé la perte d’élément dans la région.

La découverte de samedi a obligé de nombreux habitants à rester chez eux, craignant une répression de la part des forces de sécurité dans la région.

<https://www.237online.com/cameroun-crise-anglophone-un-autre-militaire-tue-par-les-separatistes/>

1. **Cameroun – Crise anglophone : Fritz Mbua, président du Tribunal de grande instance de Bangem libéré**

[**237online**](https://www.237online.com/author/237online/)12 avril 2019

 Temps de lecture 1 minute

[Pinterest](https://pinterest.com/pin/create/button/?url=https://www.237online.com/cameroun-crise-anglophone-fritz-mbua-president-du-tribunal-de-grande-instance-de-bangem-libere/&description=Cameroun%20%E2%80%93%20Crise%20anglophone%20%3A%20Fritz%20Mbua%2C%20pr%C3%A9sident%20du%20Tribunal%20de%20grande%20instance%20de%20Bangem%20lib%C3%A9r%C3%A9&media=https://www.237online.com/wp-content/uploads/2019/04/Mbua-Fritz.jpg) [Reddit](https://reddit.com/submit?url=https://www.237online.com/cameroun-crise-anglophone-fritz-mbua-president-du-tribunal-de-grande-instance-de-bangem-libere/&title=Cameroun%20%E2%80%93%20Crise%20anglophone%20%3A%20Fritz%20Mbua%2C%20pr%C3%A9sident%20du%20Tribunal%20de%20grande%20instance%20de%20Bangem%20lib%C3%A9r%C3%A9)

Fritz Mbua, président du Tribunal de grande instance de Bangem, dans le département du Kupe Manenguba, ressort de la cour d’appel du Sud-ouest, respire enfin l’air de la liberté.

[Kidnappé mardi dernier 9 avril 2019 par des hommes armés non identifiés](https://www.237online.com/cameroun-crise-anglophone-le-president-du-tribunal-de-bangem-enleve/), le patron du Tgi de Bangem a passé un peu plus de 24h en captivité avant d’être élargi. Son enlèvement, a-t-on appris a eu lieu à Mile 15 par Buea. Ses ravisseurs l’ont conduit dans une destination inconnue.

Ce rapt est intervenu au moment où les séparatistes avaient imposé aux populations du département du Fako, dix (10) jours de villes mortes. Soit du 4 au 13 avril 2019. Ceci afin de frustrer la tenue du Festac (festival des arts et de la culture), organisé par la communauté urbaine de Limbe. Un appel aux villes mortes partiellement respecté dans ce département. Malgré ce mot d’ordre de désobéissance civile, le festival des arts et de la culture s’est déroulé sans anicroche.

Par conséquent, des leaders de la diaspora, réunis au sein du conseil de la république virtuelle d’Ambazonie dénommé Southern Cameroons Liberation Council, ont demandé aux séparatistes sur le terrain de lever le mot d’ordre. Ils justifient cette décision par l’impact négatif qu’ont les villes mortes sur la population. Est-ce qu’ils seront entendus par les séparatistes sur le terrain ?

Faut-il le rappeler, au fort des échanges nourris de coups de feu entre les forces séparatistes et les forces de défense et de sécurité nationale, le président du Tgi de Bangem avait placé sa famille en lieu sûr à Buea. Ceci afin de se mettre à l’abri d’une éventuelle attaque.

<https://www.237online.com/cameroun-crise-anglophone-fritz-mbua-president-du-tribunal-de-grande-instance-de-bangem-libere/>

# Cameroun – Crise anglophone : l’armée attaque un camp séparatiste à Kumbo

[**237online**](https://www.237online.com/author/237online/)12 avril 2019

 Temps de lecture 1 minute

[Pinterest](https://pinterest.com/pin/create/button/?url=https://www.237online.com/cameroun-crise-anglophone-larmee-attaque-un-camp-separatiste-a-kumbo/&description=Cameroun%20%E2%80%93%20Crise%20anglophone%20%3A%20l%E2%80%99arm%C3%A9e%20attaque%20un%20camp%20s%C3%A9paratiste%20%C3%A0%20Kumbo&media=https://www.237online.com/wp-content/uploads/2019/04/armee-camp-rebelles.jpg) [Reddit](https://reddit.com/submit?url=https://www.237online.com/cameroun-crise-anglophone-larmee-attaque-un-camp-separatiste-a-kumbo/&title=Cameroun%20%E2%80%93%20Crise%20anglophone%20%3A%20l%E2%80%99arm%C3%A9e%20attaque%20un%20camp%20s%C3%A9paratiste%20%C3%A0%20Kumbo)

Les hommes armés actifs dans la région du Nord-ouest avaient fait du Lycée technique de Kumbo une de leurs bases.

Dans une « note d’information », des détails sont apportés sur l’attaque du 4 avril à Melouf, un quartier de Kumo, région du Nord-ouest du Cameroun.

«*En effet, le 4 avril dernier, une Force constituée des éléments de la gendarmerie et de la police, a mené une opération sur la base des renseignements reçus de la population, contre une base de retranchement d’une bande de terroristes qui s’étaient installés au Lycée Technique de Kumbo, après en avoir interdit l’accès aux élèves*», apprend –on de ce document.

L’on peut également y lire que « *la force, qui s’est retrouvée coincée par les tirs de l’ennemi qui avait reçu du renfort des bases voisines, a été soutenue par le détachement du BIR stationné dans la ville, dont le rôle principal a été de dégager les barricades et refermer les tranchées creusées à plusieurs endroits sur la route* ».

Bilan des courses «*4 terroristes neutralisés, 10 armes de traite récupérées, 18 munitions de calibre 12 récupérées, un stock de gris-gris détruit*».

Après cette offensive, l’Ong Human Rights Watch avait accusé l’armée d’avoir tué des civils, dont une personne handicapée et un guérisseur traditionnel.

Pour certains observateurs, ces guérisseurs traditionnels, pourvoyeurs de « gris-gris » contre les balles aux séparatistes, agacent au plus haut point les soldats. Ils sont de fait des cibles militaires.

<https://www.237online.com/cameroun-crise-anglophone-larmee-attaque-un-camp-separatiste-a-kumbo/>

1. **Cameroun – Crise Anglophone: Le président du tribunal de Bangem enlevé**

[**237online**](https://www.237online.com/author/237online/)12 avril 2019

 Temps de lecture 1 minute

[Pinterest](https://pinterest.com/pin/create/button/?url=https://www.237online.com/cameroun-crise-anglophone-le-president-du-tribunal-de-bangem-enleve/&description=Cameroun%20%E2%80%93%20Crise%20Anglophone%3A%20Le%20pr%C3%A9sident%20du%20tribunal%20de%20Bangem%20enlev%C3%A9&media=https://www.237online.com/wp-content/uploads/2019/01/bamenda-frondeur-2.jpg) [Reddit](https://reddit.com/submit?url=https://www.237online.com/cameroun-crise-anglophone-le-president-du-tribunal-de-bangem-enleve/&title=Cameroun%20%E2%80%93%20Crise%20Anglophone%3A%20Le%20pr%C3%A9sident%20du%20tribunal%20de%20Bangem%20enlev%C3%A9)

Le magistrat Mbua Fritz a été enlevé, mardi 9 avril 2019, par des séparatistes présumés dans le Sud-Ouest, une des deux régions du pays en proie à un conflit armé.

Le président du tribunal de Bangem dans le département de la Koupé-Manengouba, a été enlevé, mardi 9 avril, par des séparatistes présumés au lieu-dit Mile 15 Buea dans la région du Sud-Ouest, selon plusieurs sources sécuritaires de ladite région.

« Jusqu’à présent, nous n’avons pas de nouvelles du magistrat Mbua Fritz enlevé mardi. Une opération de ratissage se déroule actuellement dans la zone pour retrouver le magistrat », rapporte notre source.

D’après des sources familiales, le magistrat Mbua Frizt avait fui les violences dans la Koupé-Manengouba pour se réfugier à Tiko dans le Sud-Ouest. « Ca fait plusieurs mois que notre frère vit à Tiko », soutient un membre de sa famille.

Les deux régions en crise sont, depuis les événements du 1er octobre 2017, les bastions de bandes armées qui y procèdent à des prises d’otage ainsi qu’à des attaques de civils et de militaires.

Les séparatistes multiplient les enlèvements d’autorités, de militaires et policiers, ainsi que des civils dans les régions du Sud-Ouest et du Nord-Ouest, d’une part pour maintenir la pression sur le pouvoir à Yaoundé et d’autre part pour exiger des rançons permettant aux groupes armés de tenir.

Cet incident survient un an exactement après le rapt d’un autre magistrat dans le Sud-Ouest. Le 8 avril2018, l’ancien vice-président de la Cour d’appel du Sud-Ouest, Justice Mbeng Martin, avait été kidnappé au village Ewelle, situé dans le département de la Manyu, où se tenaient les obsèques de sa maman.

<https://www.237online.com/cameroun-crise-anglophone-le-president-du-tribunal-de-bangem-enleve/>

1. **Cameroun – Crise anglophone: Paul Atanga Nji, offre Bibles et Chapelets à des ex-combattants sécessionnistes**

[**237online**](https://www.237online.com/author/237online/)26 mars 2019

 Temps de lecture 1 minute

[Pinterest](https://pinterest.com/pin/create/button/?url=https://www.237online.com/cameroun-crise-anglophone-paul-atanga-nji-offre-bibles-et-chapelets-a-des-ex-combattants-secessionnistes/&description=Cameroun%20%E2%80%93%20Crise%20anglophone%3A%20Paul%20Atanga%20Nji%2C%20offre%20Bibles%20et%20Chapelets%20%C3%A0%20des%20ex-combattants%20s%C3%A9cessionnistes&media=https://www.237online.com/wp-content/uploads/2018/10/Atanga-Nji-paul-2.jpg) [Reddit](https://reddit.com/submit?url=https://www.237online.com/cameroun-crise-anglophone-paul-atanga-nji-offre-bibles-et-chapelets-a-des-ex-combattants-secessionnistes/&title=Cameroun%20%E2%80%93%20Crise%20anglophone%3A%20Paul%20Atanga%20Nji%2C%20offre%20Bibles%20et%20Chapelets%20%C3%A0%20des%20ex-combattants%20s%C3%A9cessionnistes)

C’était lors de sa visite dans le chef-lieu du département de la Mezam dans la région du Nord-Ouest le Week-end dernier.

Paul Atanga Nji, le ministre de l’Administration Territoriale (MINAT) a effectué une visite de travail à Bamenda dans le Nord-Ouest le week-end dernier. C’était pour discuter avec les forces vives de la région, de la crise qui secoue la région depuis octobre 2016.

Le MINAT en a profité pour visiter le centre régional de désarmement, de démobilisation et de réintégration des ex-combattants du Boko Haram et des groupes rebelles dans le Nord-Ouest et le Sud-Ouest.

Le journal Mutations en kiosque le 26 mars 2019, rapporte qu’à l’occasion, «Paul Atanga Nji a remis des chapelets et des bibles à 27 ex-combattants des groupes sécessionnistes». En les rassurant qu’ils ne seront pas poursuivis par la justice et tous ceux qui, avec eux, vont déposer volontairement les armes.

Le MINAT a saisi l’occasion de la visite, pour renouveler l’appel aux groupes armés à déposer les armes. «Nous avons discuté avec les militants du RDPC (Rassemblement Démocratique du Peuple Camerounais), nous avons discuté avec les chefs traditionnels et les communautés religieuses. Parce que vous savez, nous avons des défis à relever en ce qui concerne la paix. Nous avons expliqué tout ce que le Président de la République a fait depuis deux ans pour ramener la paix dans le Nord-Ouest et le Sud-Ouest».

Le Coordonnateur départemental du Rassemblement Démocratique du Peuple Camerounais (RDPC) pour la Mezam a demandé aux populations de ces régions du Nord-Ouest et du Sud-Ouest, d’emboiter le pas de Paul Biya, Président de la République du Cameroun. Que chacun à son niveau prêche la paix et la tranquillité parce que le désordre ne profite à personne.

<https://www.237online.com/cameroun-crise-anglophone-paul-atanga-nji-offre-bibles-et-chapelets-a-des-ex-combattants-secessionnistes/>

1. **Cameroun – Crise anglophone/Paul Atanga Nji à Bamenda: «Les terroristes doivent déposer les armes…ils n’iront pas en prison»**

[**237online**](https://www.237online.com/author/237online/)26 mars 2019

 Temps de lecture 1 minute

[Pinterest](https://pinterest.com/pin/create/button/?url=https://www.237online.com/cameroun-crise-anglophone-paul-atanga-nji-a-bamenda-les-terroristes-doivent-deposer-les-armes-ils-niront-pas-en-prison/&description=Cameroun%20%E2%80%93%20Crise%20anglophone%2FPaul%20Atanga%20Nji%20%C3%A0%20Bamenda%3A%20%C2%ABLes%20terroristes%20doivent%20d%C3%A9poser%20les%20armes%E2%80%A6ils%20n%E2%80%99iront%20pas%20en%20prison%C2%BB&media=https://www.237online.com/wp-content/uploads/2019/03/Paul-Atanga-Nji.jpg) [Reddit](https://reddit.com/submit?url=https://www.237online.com/cameroun-crise-anglophone-paul-atanga-nji-a-bamenda-les-terroristes-doivent-deposer-les-armes-ils-niront-pas-en-prison/&title=Cameroun%20%E2%80%93%20Crise%20anglophone%2FPaul%20Atanga%20Nji%20%C3%A0%20Bamenda%3A%20%C2%ABLes%20terroristes%20doivent%20d%C3%A9poser%20les%20armes%E2%80%A6ils%20n%E2%80%99iront%20pas%20en%20prison%C2%BB)

Le ministre de l’Administration Territoriale était le week-end dernier à Bamenda, où il a une fois de plus exhorté les milices armées à déposer les armes.

Paul Atanga Nji n’a pas effectué beaucoup de visites officielles dans la région du Nord-Ouest depuis le déclenchement de la crise anglophone en octobre 2016. C’est que, le ministre de l’Administration Territoriale (MINAT), qui était à l’époque ministre chargé de mission à la Présidence de la République, a été accusé par des leaders anglophones d’être l’un des membres du gouvernement ayant mis de l’huile sur le feu alors que le mouvement en était encore aux revendications corporatistes.

C’était donc un petit évènement le week-end dernier lorsque le Coordonnateur départemental du Rassemblement Démocratique du Peuple Camerounais (RDPC) pour la Mezam est arrivé à Bamenda. Si cette descente coïncidait avec la célébration du 34è anniversaire du parti au pouvoir, elle avait également pour but de partager avec les forces vives du Nord-Ouest, les actions mises en œuvre par Yaoundé pour mettre un terme à la crise.

Atanga Nji en a profité pour renouveler l’appel aux milices armées à déposer les armes. «Nous avons discuté avec les militants du RDPC, nous avons discuté avec les chefs traditionnels et les communautés religieuses. Parce que vous savez, nous avons des défis à relever en ce qui concerne la paix. Nous avons expliqué tout ce que le Président de la République a fait depuis deux ans pour ramener la paix dans le Nord-Ouest et le Sud-Ouest», a-t-il déclaré à la presse.

«Il est question que tout le monde emboite le pas; que chacun à son niveau prêche la paix et la tranquillité parce que le désordre ne profite à personne… Nous avons dit ce que le Chef de l’Etat nous a recommandés. Les terroristes doivent déposer les armes et quand ils vont déposer les armes, ils vont intégrer le Comité National de Désarmement, de Démobilisation et de Réintégration. Ceux qui déposeront les armes n’iront pas en prison», a rassuré le MINAT.

<https://www.237online.com/cameroun-crise-anglophone-paul-atanga-nji-a-bamenda-les-terroristes-doivent-deposer-les-armes-ils-niront-pas-en-prison/>

1. **Cameroun : la CRTV s’est plantée, Paul Biya et Tibor Nagy ont discuté de la crise anglophone !**

[**237online**](https://www.237online.com/author/237online/)20 mars 2019

 Temps de lecture 1 minute

[Pinterest](https://pinterest.com/pin/create/button/?url=https://www.237online.com/cameroun-la-crtv-sest-plantee-paul-biya-et-tibor-nagy-ont-discute-de-la-crise-anglophone/&description=Cameroun%20%3A%20la%20CRTV%20s%E2%80%99est%20plant%C3%A9e%2C%20Paul%20Biya%20et%20Tibor%20Nagy%20ont%20discut%C3%A9%20de%20la%20crise%20anglophone%20%21&media=https://www.237online.com/wp-content/uploads/2019/03/Paul-Biya-et-Tibor-Nagy.jpg) [Reddit](https://reddit.com/submit?url=https://www.237online.com/cameroun-la-crtv-sest-plantee-paul-biya-et-tibor-nagy-ont-discute-de-la-crise-anglophone/&title=Cameroun%20%3A%20la%20CRTV%20s%E2%80%99est%20plant%C3%A9e%2C%20Paul%20Biya%20et%20Tibor%20Nagy%20ont%20discut%C3%A9%20de%20la%20crise%20anglophone%20%21)

Contrairement aux informations données par le média d’État, Paul Biya et Tibor Nagy ont abordé le sujet relatif à la crise dans les régions du Nord-Ouest et du Sud-Ouest.

Le Chef de l’Etat a accordé une audience au Secrétaire d’Etat adjoint américain aux Affaires africaines le 18 mars 2019 au Palais de l’Unité. Dans son compte-rendu diffusé au journal de 17 h de la CRTV radio, le journaliste Dieudonné Omgba a laissé entendre que Paul Biya et Tibor Nagy ont évité les sujets qui fâchent.

«…des sources dignes de foi, l’affaire Maurice Kamto n’a nullement été évoquée; ni la crise dans le Nord-Ouest et le Sud-Ouest», a affirmé notre confrère. Cette information est fausse à en croire Tibor Nagy lui-même. Quelques heures après son tête-à-tête avec le numéro 1 camerounais, le diplomate américain a posté un tweet sur le contenu de leurs échanges.

«Aujourd’hui, le Président Paul Biya et moi-même avons discuté de la marche à suivre dans nos relations bilatérales, notre assistance en matière de sécurité et nos préoccupations en matière de droits humains #Cameroon. J’ai également encouragé la fin de la violence et du dialogue inclusif dans les régions du Nord-Ouest et du Sud-Ouest», a twitté l’envoyé du Président américain Donald Trump.

La sortie de Tibor Nagy démontre bien que les sujets de discorde entre Yaoundé et Washington n’ont pas été évités au cours de l’audience. Les Etats-Unis critiquent le gouvernement camerounais pour la gestion de la crise anglophone et l’emprisonnement de l’opposant Maurice Kamto et ses partisans.

<https://www.237online.com/cameroun-la-crtv-sest-plantee-paul-biya-et-tibor-nagy-ont-discute-de-la-crise-anglophone/>

1. **Cameroun – Crise anglophone : les USA pour un «forum international»**

[**237online**](https://www.237online.com/author/237online/)13 mars 2019

 2 minutes de lecture

[Pinterest](https://pinterest.com/pin/create/button/?url=https://www.237online.com/cameroun-crise-anglophone-les-usa-pour-un-forum-international/&description=Cameroun%20%E2%80%93%20Crise%20anglophone%20%3A%20les%20USA%20pour%20un%20%C2%ABforum%20international%C2%BB&media=https://www.237online.com/wp-content/uploads/2019/03/Tibor-Navy-usa.jpg) [Reddit](https://reddit.com/submit?url=https://www.237online.com/cameroun-crise-anglophone-les-usa-pour-un-forum-international/&title=Cameroun%20%E2%80%93%20Crise%20anglophone%20%3A%20les%20USA%20pour%20un%20%C2%ABforum%20international%C2%BB)

L’idée a été émise ce 12 mars par le secrétaire d’État adjoint aux Affaires africaines lors d’une téléconférence de presse.

À mi-parcours de sa tournée en Afrique centrale, le secrétaire d’État aux Affaires africaines des États-Unis a donné une téléconférence de presse ce 12 mars 2019. A l’occasion, Tibor Navy est revenu sur le conflit qui oppose, depuis plus de deux ans, le gouvernement camerounais aux séparatistes anglophones à l’ouest du pays. «*Il faut peut – être amener la discussion dans un forum international à fin de discuter davantage*», a-t-il indiqué, affirmant que la situation se dégrade au jour le jour. Sauf que l’émissaire de Donal Trump ne s’est pas étendu sur les contours d’une telle initiative.

Dans une interview diffusée le 6 mars dernier sur l’antenne de Radio France internationale, le diplomate estimait qu’«une conférence de haut niveau permettant à toutes les parties de dialoguer serait une bonne idée». *Pour le secrétaire d’État aux Affaires africaines des États-Unis d’Amérique, «le gouvernement sous-estime l’ampleur du problème*». De ce fait, il ne ferait pas preuve d’un «grand sérieux » pour résoudre la crise. Le «forum international» apparait donc comme un moyen d’empêcher de tourner en rond.

Sur le sujet, le «Monsieur Afrique» du département d’État américain souligne qu’il y a une convergence de vues entre Washington et les autres pays occidentaux. «*Avant de commencer mon voyage, j’ai eu l’opportunité d’être à Paris et d’avoir une rencontre avec mes collègues responsables des questions africaines au sein des pays du G7. Et j’ai été ravi de voir qu’on avait des points de vus communs concernant le Cameroun. Comme l’illustre la déclaration de l’Union européenne (UE) publiée la semaine dernière*», confie Tibor Navy. Dans ce communiqué, l’UE regrette un «nombre inacceptable de victimes et un impact lourd en termes humanitaire et économique» et appelle à « un dialogue inclusif» pour régler la crise.

Depuis ces sorties médiatiques, le gouvernement, le parlement, certains partis politiques et une partie de la presse sont vent debout. Ils dénoncent «*l’ingérence des puissances étrangères dans les affaires intérieures du Cameroun». Pour le gouvernement, qui dit être conscient à la fois «de la gravité de la situation et de ses obligations régaliennes*», la situation dans les régions anglophones est «sous contre et les perspective d’un retour à la normale se font chaque jour plus propices».

<https://www.237online.com/cameroun-crise-anglophone-les-usa-pour-un-forum-international/>

1. **Crise anglophone : les méthodes de l’armée embarrassent le gouvernement camerounais**

[**237online**](https://www.237online.com/author/237online/)26 février 2019

 2 minutes de lecture

[Pinterest](https://pinterest.com/pin/create/button/?url=https://www.237online.com/crise-anglophone-les-methodes-de-larmee-embarrassent-le-gouvernement-camerounais/&description=Crise%20anglophone%20%3A%20les%20m%C3%A9thodes%20de%20l%E2%80%99arm%C3%A9e%20embarrassent%20le%20gouvernement%20camerounais&media=https://www.237online.com/wp-content/uploads/2019/02/boutique-en-feu-nord-ouest.jpg) [Reddit](https://reddit.com/submit?url=https://www.237online.com/crise-anglophone-les-methodes-de-larmee-embarrassent-le-gouvernement-camerounais/&title=Crise%20anglophone%20%3A%20les%20m%C3%A9thodes%20de%20l%E2%80%99arm%C3%A9e%20embarrassent%20le%20gouvernement%20camerounais)

En appliquant la tactique de la terre brulée, les soldats obligent le gouvernement à se défendre d’accusations d’exactions dans les régions du Nord-Ouest et du Sud-Ouest.

Le jeudi 21 février, le ministre de la Communication du Cameroun se fend d’un « communiqué de presse » dans lequel il vole au secours de l’armée. Celle-ci est en effet accusée par des ONG internationales d’avoir incendié des maisons d’habitation dans les environs de Kumbo, une ville de la région du Nord-Ouest, dans le cadre de la crise anglophone.

«*Le gouvernement dément formellement ces allégations et tient à préciser que les forces de défense et de sécurité présentes dans cette région en proie aux attaques régulières des hordes de sécessionnistes ont essentiellement vocation à assurer la protection du territoire national ainsi que celle des personnes et des biens*» pose d’emblée René Emmanuel Sadi.

Des unités de l’armée sont accusées d’user de la tactique de la terre brulée, en incendiant maisons, écoles, marchés, villages et même hôpitaux. Des témoignages d’habitants des régions ont souvent fait état de ce que des soldats mènent régulièrement des descentes dans des formations sanitaires et interpellent durement le personnel sur des combattants qui y recevraient des soins. «*Nous sommes sous pression*», avait confié un responsable médical de l’hôpital de Shisong, à Bamenda, sans dire davantage sur d’où vient cette pression.

La sortie du ministre de la Communication laisse entendre en filigrane que les témoignages ne sont pas si éloignés que cela de la vérité. Car René Emmanuel Sadi avoue que pour répondre à une intrusion de combattants séparatistes, les forces de défense et de sécurité sont intervenues et ont mis les assaillants en déroute « *en procédant, par ailleurs, à des actions ciblées, détruisant les abris leur servant de refuge*».

Des habitants ont en effet reconnu que les infrastructures détruites servent de refuge aux bandes armées. Cependant, le ministre de la Communication rejette toute destruction de maisons par l’armée.

Mais le porte-parole du gouvernement ajoute : “en aucun cas, les forces camerounaises de défense n’ont incendié des maisons d’habitation”.

Il y a quelques semaines, le colonel Didier Badjeck chef de la division de la communication du ministère de le Défense confirmait ces méthodes de l’armée aux journalistes américains du Washington Post «*L’armée brule les camps des sécessionnistes. Lorsque nous trouvons un camp de sécessionnistes dans la forêt, ne croyez pas qu’on ne va pas le brûler. On va le bruler*».

<https://www.237online.com/crise-anglophone-les-methodes-de-larmee-embarrassent-le-gouvernement-camerounais/>

1. **Cameroun – Crise anglophone: Un colonel tombe au front de bataille ?**

[**237online**](https://www.237online.com/author/237online/)25 janvier 2019

 Temps de lecture 1 minute

[Pinterest](https://pinterest.com/pin/create/button/?url=https://www.237online.com/cameroun-crise-anglophone-un-colonel-tombe-au-front-de-bataille/&description=Cameroun%20%E2%80%93%20Crise%20anglophone%3A%20Un%20colonel%20tombe%20au%20front%20de%20bataille%20%3F&media=https://www.237online.com/wp-content/uploads/2018/11/Colonel-Didier-Badjeck.jpg) [Reddit](https://reddit.com/submit?url=https://www.237online.com/cameroun-crise-anglophone-un-colonel-tombe-au-front-de-bataille/&title=Cameroun%20%E2%80%93%20Crise%20anglophone%3A%20Un%20colonel%20tombe%20au%20front%20de%20bataille%20%3F)

*Nous apprenons à l’instant que le Colonel YAOUBA Ousmanou, commandant du 3 ème bataillon amphibie du BIR à Limbe vient d’être abbatu à Kumbo par les Ambazoniens.*

MISE AU POINT.

Une information selon laquelle un certain « Colonel Yaouba Ousmanou » apparatenant au 3eme Bataillon amphibie du BIR aurait été abattu par les sécessionnistes à hauteur de Kumbo, circule en ce moment. Nous démentons catégoriquement cette information qui fait le buzz dans l’infosphère, certainement dans le but inavoué de désinformer, distraire, ou véhiculer des informations de nature à saper moral de nos Forces, et à créer la psychose auprès des populations. L’unité en question n’existe que dans l’imaginaire élucubratif de son auteur, ainsi que cet officier inconnu de nos effectifs. C’est l’occasion de vous inviter à prendre toutes les précautions dans la gestion des informations liées à la sécurité.
Consultez nous au préalable.

<https://www.237online.com/cameroun-crise-anglophone-un-colonel-tombe-au-front-de-bataille/>

1. **Cameroun – Crise Anglophone : des séparatistes incendient un véhicule d’Hysacam à Bamenda**

[**237online**](https://www.237online.com/author/237online/)21 janvier 2019

 Temps de lecture 1 minute

[Pinterest](https://pinterest.com/pin/create/button/?url=https://www.237online.com/cameroun-crise-anglophone-des-separatistes-incendient-un-vehicule-dhysacam-a-bamenda/&description=Cameroun%20%E2%80%93%20Crise%20Anglophone%20%3A%20des%20s%C3%A9paratistes%20incendient%20un%20v%C3%A9hicule%20d%E2%80%99Hysacam%20%C3%A0%20Bamenda&media=https://www.237online.com/wp-content/uploads/2018/10/hysacam.jpg) [Reddit](https://reddit.com/submit?url=https://www.237online.com/cameroun-crise-anglophone-des-separatistes-incendient-un-vehicule-dhysacam-a-bamenda/&title=Cameroun%20%E2%80%93%20Crise%20Anglophone%20%3A%20des%20s%C3%A9paratistes%20incendient%20un%20v%C3%A9hicule%20d%E2%80%99Hysacam%20%C3%A0%20Bamenda)

Le drame est survenu au carrefour du quartier Mbessi (arrondissement de Bamenda 3e) dans la matinée du 19 janvier 2019.

Des hommes ont armés ont pris d’assaut un véhicule de ramassage des ordures de l’entreprise Hygiène et salubrité du Cameroun (Hysacam).

Ils y ont mis du feu avant de s’enfuir à bord d’une moto. Le chauffeur et les agents d’entretien à bord ont juste le temps de se sauver. Dans le rayon jouxtant l’horrible scène, une grosse panique s’est emparée des populations.

Les commerçants du marché de Nkwen, situé à environ 700m, a dû fermer. Pareil à la gare routière non loin de là et même au carrefour de Mile 4. Mises au parfum, les forces de l’ordre sont descendues sur les lieux. Des indices en leur possession font croire que les auteurs de l’ignoble acte sont des séparatistes.

<https://www.237online.com/cameroun-crise-anglophone-des-separatistes-incendient-un-vehicule-dhysacam-a-bamenda/>

1. **Cameroun – Crise anglophone: sept séparatistes tués par l’armée (Officielle)**

[**237online**](https://www.237online.com/author/237online/)13 janvier 2019

 Temps de lecture 1 minute

L’armée camerounaise a neutralisé sept assaillants au cours d’une « opération de reconnaissance offensive » samedi à Alabukam, près de Bamenda, chef-lieu de la région anglophone du Nord-Ouest, a-t-on appris de sources proches des forces de défense.

L’opération a permis la destruction d’un camp de combattants sécessionnistes et la récupération d’armes légères, de munitions, d’uniformes militaires et de moyens de transport comme des motocyclettes, ont indiqué les mêmes sources à l’AFP.

Cette offensive survient après des appels au cessez-le-feu lancés par le président Paul Biya en novembre et décembre derniers.

Début décembre, Yaoundé a mis en place un programme de désarmement dans toutes ses zones en conflit avec un comité national de désarmement, de démobilisation et de réintégration (CNDDR) pour les combattants.

Les leaders officiels des organisations sécessionnistes, arrêtés début 2018 au Nigeria et dont le procès à Yaoundé a été renvoyé au 7 février, n’ont pas répondu à cette offre.

« Si l’appel à déposer les armes que j’ai lancé aux entrepreneurs de guerre reste sans réponse, les forces de défense et de sécurité recevront instruction de les neutraliser », avait déclaré M. Biya en présentant ses voeux le 31 décembre.

Les séparatistes anglophones militent pour la création d’un Etat indépendant dans le Nord-ouest et le Sud-ouest, théâtre d’un conflit armé depuis fin 2017.

Des affrontements entre l’armée et ces séparatistes armés, regroupés en groupes épars dans la forêt équatoriale, s’y produisent depuis quasiment chaque jour.

Dans ce conflit, se sont en outre invités bandits et pillards qui rackettent les populations et les entreprises.

L’armée camerounaise elle-même a été accusée de violations des droits humains en zone anglophone par des organisations internationales.

Plus de 200 membres des forces de défense et sécurité camerounaises ont perdu la vie dans ce conflit, ainsi que plus de 500 civils, selon le centre d’analyse International Crisis Group (ICG).

<https://www.237online.com/cameroun-crise-anglophone-sept-separatistes-tues-par-larmee-officielle/>

1. **Cameroun – Crise Anglophone : L’armée dans un combat acharné neutralise plus de 20 séparatistes au Nord-ouest**

[**237online**](https://www.237online.com/author/237online/)12 janvier 2019

 Temps de lecture 1 minute

[Pinterest](https://pinterest.com/pin/create/button/?url=https://www.237online.com/cameroun-crise-anglophone-larmee-dans-un-combat-acharne-neutralise-plus-de-20-separatistes-au-nord-ouest/&description=Cameroun%20%E2%80%93%20Crise%20Anglophone%20%3A%20L%E2%80%99arm%C3%A9e%20dans%20un%20combat%20acharn%C3%A9%20neutralise%20plus%20de%2020%20s%C3%A9paratistes%20au%20Nord-ouest&media=https://www.237online.com/wp-content/uploads/2018/11/separatistes-anglophones.jpg) [Reddit](https://reddit.com/submit?url=https://www.237online.com/cameroun-crise-anglophone-larmee-dans-un-combat-acharne-neutralise-plus-de-20-separatistes-au-nord-ouest/&title=Cameroun%20%E2%80%93%20Crise%20Anglophone%20%3A%20L%E2%80%99arm%C3%A9e%20dans%20un%20combat%20acharn%C3%A9%20neutralise%20plus%20de%2020%20s%C3%A9paratistes%20au%20Nord-ouest)

Au moins 20 séparatistes armés ont été neutralisés par les éléments du 52 Bataillon d’Infanterie Motorisée (BRIM) sur l’axe de Sabongari et Nkambe, région du Nord-ouest.

Selon nos informations, une patrouille de la 52e BRIM de Nkambe, en opération militaire chemin est tombée sur des séparatistes armés sur l’axe Sabongari-Nkambe.

« *Les séparatistes ont ouvert le feu en premier sur nos éléments qui ont riposté, une vingtaine de terroristes ont été tués*», confie une source militaire.

Dans son message à la nation du 31 décembre, le président Biya a promis de neutraliser tous les séparatistes qui n’accepteraient pas son appel à déposer les armes, « si l’appel à déposer les armes que j’ai lancé aux entrepreneurs de guerre reste sans réponse, les forces de défense et de sécurité recevront instruction de les neutraliser», déclarait le chef d’Etat camerounais.

Ayuk Tabe

Le leader séparatiste, Ayuk Tabe et 9 de ses coaccusés arrêtés en janvier 2018 et dont le procès a été ouvert le 6 décembre dernier sont jugés au tribunal militaire de Yaoundé pour « *actes de terrorisme*», «*hostilité contre la patrie*» et « *atteinte à la sûreté intérieure et extérieure* ».

La deuxième audience de leur procès a eu lieu le 10 janvier. Les leaders séparatistes qui contestent la nationalité camerounaise devant le tribunal, risquent la peine de mort.

<https://www.237online.com/cameroun-crise-anglophone-larmee-dans-un-combat-acharne-neutralise-plus-de-20-separatistes-au-nord-ouest/>

1. **Crise anglophone : l’armée tue deux autres généraux ambazoniens**

[**237online**](https://www.237online.com/author/237online/)8 janvier 2019

 Temps de lecture 1 minute

[Pinterest](https://pinterest.com/pin/create/button/?url=https://www.237online.com/crise-anglophone-larmee-tue-deux-autres-generaux-ambazoniens/&description=Crise%20anglophone%20%3A%20l%E2%80%99arm%C3%A9e%20tue%20deux%20autres%20g%C3%A9n%C3%A9raux%20ambazoniens&media=https://www.237online.com/wp-content/uploads/2019/01/Ojong-Elvis-Ojong.jpg) [Reddit](https://reddit.com/submit?url=https://www.237online.com/crise-anglophone-larmee-tue-deux-autres-generaux-ambazoniens/&title=Crise%20anglophone%20%3A%20l%E2%80%99arm%C3%A9e%20tue%20deux%20autres%20g%C3%A9n%C3%A9raux%20ambazoniens)

Les généraux Ojong Elvis Ojong et Obi ont été tués dimanche, au cours d’une opération militaire dans la ville de Mamfé, région du Nord-Ouest.

Les éléments du Bataillon d’intervention rapide (Bir) ont neutralisé deux leaders des factions armées ambazoniennes. Victor Obi A.k.a « général Ibo » a été tué lors d’un raïd mené par l’armée aux premières heures de la journée de dimanche. Ce jeune homme de 26 ans avait rejoint les forces de défenses de l’Ambazonie (Adf) après avoir fui l’arrivée des soldats à Kajifu (département du Manyu, région du Sud-Ouest) en décembre 2017.

Ojong Elvis Ojong, alias « General Eyong », un autre chef de guerre séparatiste, a été tué au cours de ces mêmes opérations.

Les concernés qui avaient trouvé refuge en divers lieux en brousse ont été surpris par les militaires. Leurs camps ont été rasés et des armes récupérées.

<https://www.237online.com/crise-anglophone-larmee-tue-deux-autres-generaux-ambazoniens/>

1. **Crise anglophone au Cameroun : Le dernier général ambazonien en vie s’enfuit au Nigeria**

[**237online**](https://www.237online.com/author/237online/)3 janvier 2019

 2 minutes de lecture

[Pinterest](https://pinterest.com/pin/create/button/?url=https://www.237online.com/crise-anglophone-au-cameroun-le-dernier-general-ambazonien-en-vie-senfuit-au-nigeria/&description=Crise%20anglophone%20au%20Cameroun%20%3A%20Le%20dernier%20g%C3%A9n%C3%A9ral%20ambazonien%20en%20vie%20s%E2%80%99enfuit%20au%20Nigeria&media=https://www.237online.com/wp-content/uploads/2019/01/Field-Marshal-Red-Dragons.jpg) [Reddit](https://reddit.com/submit?url=https://www.237online.com/crise-anglophone-au-cameroun-le-dernier-general-ambazonien-en-vie-senfuit-au-nigeria/&title=Crise%20anglophone%20au%20Cameroun%20%3A%20Le%20dernier%20g%C3%A9n%C3%A9ral%20ambazonien%20en%20vie%20s%E2%80%99enfuit%20au%20Nigeria)

Field Marshall, l’un des chefs de guerre de l’Ambazonie, a survécu à une opération militaire menée par les forces camerounaises dans la localité de Menji, région du Sud-Ouest.

Selon des sources concordantes, Field Marshall, leader des « Red dragons », serait bel et bien en vie, contrairement à l’annonce de sa mort qui circule depuis le 31 décembre dernier. Ce chef de milice aurait été touché par balle au cours de combats avec l’armée camerounaise, mais aurait réussi à s’échapper vers le Nigeria.

La nouvelle a été confirmée par le porte-parole de l’armée, qui a recommandé de la prudence face aux informations en circulation. « Nous savons qu’il a été blessé. Mais c’est un grand acteur et manipulateur. Il se fait passer pour mort pour réapparaître afin de cultiver le mythe sur sa personne », a affirmé le 2 janvier le colonel Didier Badjeck, interrogé par Jeune Afrique.

Combats à Menji

Quelques jours avant la rumeur de la mort de Field Marshall, l’armée camerounaise avait engagé une opération militaire d’envergure à Menji, dans le département du Lebialem (région du Sud-Ouest). Située à environ 40 km de la ville de Dschang, cette localité est le bastion des « Red dragons », la milice armée à la tête de laquelle trône Field Marshall. Les combats, qui avaient commencé peu après la fête de Noël, se sont poursuivis jusqu’au Nouvel An.

Plusieurs morts seraient à dénombrer chez les sécessionnistes, selon le porte-parole de l’armée, mais Field Marshall et ses hommes ont néanmoins réussi à faire face aux soldats camerounais. Cet ancien chef de la sécurité du royaume de Fontem, à qui l’on prête des pouvoirs mystiques, continue de s’imposer comme l’un des chefs de guerre les plus résistants de l’Ambazonie. « Il est très puissant. Du temps où il travaillait pour le roi d’Azi [village du Lebialem, ndlr], il avait accès à tous les secrets. À sa mort, il a presque assuré l’intérim car le successeur du roi était au Canada », explique un déplacé de Menji, sous couvert d’anonymat.

Lutte intensifiée contre les sécessionnistes

Sur les réseaux sociaux, Leke Oliver – alias Field Marshall – travaille son image. Peu de temps après l’annonce de sa mort, de vielles photos du milicien distribuant de la nourriture aux populations pour les fêtes de fin d’année avaient rapidement été diffusées par ses partisans, pour rassurer les supporteurs de la cause ambazonienne et certifier qu’il est encore en vie. « *Personne n’a neutralisé Field Marshall. Il continue le combat, il est avec nous* », a martelé Chris Anu, le porte-parole du gouvernement ambazonien, dans une publication sur sa page Facebook.

**[Lire aussi](https://www.237online.com/qui-est-oliver-lekeaka-aka-field-marshall-des-red-dragons-decapites/" \t "_self)**

**[Qui est Oliver Lekeaka Aka Field Marshall des Red Dragons décapités ?](https://www.237online.com/qui-est-oliver-lekeaka-aka-field-marshall-des-red-dragons-decapites/" \t "_self)**

Se présentant comme le véritable défenseur de la cause ambazonienne, Field Marshall n’hésite pas à menacer de s’en prendre aux autres activistes anglophones. Pour l’armée, il ne s’agit néanmoins que d’un «*vulgaire criminel* » qui doit être stoppé au plus vite. « *Il a raté le recrutement militaire sur deux sessions, confie un cadre de l’armée. Cela justifie peut-être en partie ses actions*», explique-t-il.

Après la mort du général Amigo et du général Ivo, commandant des Forces de défense de l’Ambazonie (ADF), la disparition de Field Marshall pourrait porter un sérieux coup à la lutte armée menée par les sécessionnistes en zone anglophone. L’armée, qui en a conscience, assure qu’elle déploiera des efforts supplémentaires pour le neutraliser. Les forces camerounaises se disent portées par le message du président Paul Biya. « *Si l’appel à déposer les armes que j’ai lancé aux entrepreneurs de guerre reste sans réponse, les forces de défense et de sécurité recevront instruction de les neutraliser* », a-t-il affirmé dans son discours de fin d’année.

<https://www.237online.com/crise-anglophone-au-cameroun-le-dernier-general-ambazonien-en-vie-senfuit-au-nigeria/>

1. **Cameroun – Crise anglophone : La stratégie en pointillé de Paul Biya**

[**237online**](https://www.237online.com/author/237online/)23 décembre 2018

 6 minutes de lecture

[Pinterest](https://pinterest.com/pin/create/button/?url=https://www.237online.com/cameroun-crise-anglophone-la-strategie-en-pointille-de-paul-biya/&description=Cameroun%20%E2%80%93%20Crise%20anglophone%20%3A%20La%20strat%C3%A9gie%20en%20pointill%C3%A9%20de%20Paul%20Biya&media=https://www.237online.com/wp-content/uploads/2018/10/paul-biya-suspension-greve.jpg) [Reddit](https://reddit.com/submit?url=https://www.237online.com/cameroun-crise-anglophone-la-strategie-en-pointille-de-paul-biya/&title=Cameroun%20%E2%80%93%20Crise%20anglophone%20%3A%20La%20strat%C3%A9gie%20en%20pointill%C3%A9%20de%20Paul%20Biya)

La polémique née de la décision présidentielle d’élargir des prisonniers coupables de délits dans le cadre du conflit en cours dans les deux régions du pays ne désenfle pas.

Au-delà du ponctuel, c’est toute la stratégie du pouvoir dans ce règlement qui se décline en pointillé.

1-Noso : De la crise à la guerre

Depuis le décret N°2018/719 du 30 novembre 2018 portant création du Comité national de désarmement de démobilisation et de réintégration (Cddr), la crise anglophone a pris officiellement une autre qualification et devrait, de ce fait, se rapprocher davantage d’une guerre dans les deux régions du Nord-Ouest et du Sud-Ouest (Noso). Guerre, le mot est lâché. Et dès lors, cette réalité attise toutes les bonnes volontés à se masser aux portes du Cameroun dans l’intérêt bien compris de vouloir l’aider à retrouver le chemin de la paix. Soit ! C’est bien connu, aucun Etat dans ce monde ne supporte qu’on mette à mal sa souveraineté au nom d’une ingérence à but humanitaire. Cela signifie en clair qu’avec ce conflit qui va sous peu entrer dans sa troisième année, les puissances militaires majeures à travers la planète piaffent d’impatience de voir la paix revenir au Cameroun. Cela doit être appréhendé dans le cadre global de la gestion géostratégique du monde. Ainsi, là où les conflits majeurs naissent, elles y sont tout comme elles interviennent comme les sapeurs-pompiers pour éteindre les brasiers. L’hégémonie américaine est intervenue en Irak en 2003 pour chasser Saddam Hussein du pouvoir, au motif qu’il détenait dans son arsenal militaire des armes de destruction massive. A la fin de la désastreuse intervention, aucune arme ne fut trouvée et Saddam fut pendu. Une page était tournée et jusqu’aujourd’hui, l’Irak ne s’est pas toujours remis de cette intervention. La mise sur pied du Comité national de désarmement, de démobilisation et de réintégration suivie de l’élargissement de 289 prisonniers, seraient compris comme des initiatives du pouvoir visant premièrement à couper l’herbe sous les pieds des « zélés de l’interventionnisme ».

2-Le CNDDR est un instrument exclusif du pouvoir

Dans les autres pays où il y a eu guerre, le programme désarmement, démobilisation et réinsertion est intervenue le plus souvent d’un commun accord entre les belligérants, sous l’égide d’une institution ou d’une puissance internationale. Dans notre contexte, le CNDDR devrait intervenir quand il y a l’arrêt des hostilités. Quand le belligérant est armé, on ne voit pas très bien par quelles astuces du Comité que coordonne Faï Yengo Francis, on va l’amener à déposer l’arme. C’est pourquoi en principe, elle devrait entrer en jeu lorsque le cessez-le- feu est acté et récupérer de ce fait les armes dans un climat très apaisé. En menant les choses de la sorte, on estime que le pouvoir ne veut pas être surpris par un agenda venu d’ailleurs. Ce programme de désarmement, dans d’autres pays qui ont connu la guerre interne, coûte très cher. En Rca par exemple, il a fallu que le Minusca et la Banque mondiale mettent la main à la poche pour soutenir les efforts de ce pays dévasté par la guerre.

Or au Cameroun, le gouvernement est dans une logique qui consiste à faire la paix par lui-même sur son territoire, sans l’intervention d’une force extérieure. On ne peut lui faire aucun procès dès lors qu’une telle mesure porte des fruits. Pour l’instant, la mise sur place du CNDDR en fin du mois passé n’a produit aucun résultat, même si c’est trop tôt d’envisager des résultats. On peut se demander au nom de quoi, un combattant va déposer son arme ? Ailleurs, il y a une somme d’argent qu’on verse à ceux qui viennent déposer leurs armes. Il est aussi vrai que les combattants séparatistes ne disposent pas d’un arsenal considérable et se contentent généralement des armes arrachées des mains des forces de sécurité dans les guet-apens ou par voie de contrebande. Le deuxième élément qui compte dans ce programme est l’amnistie en faveur de tous les belligérants. Ces deux points semblent pour l’instant ne pas être incorporés dans le programme du CNDDR. Il faudrait de ce fait intéresser les belligérants même à titre personnel de déposer les armes. Le président de la République l’a demandé mais les mesures qui vont faciliter cette exigence présidentielle, tardent à se matérialiser ou à être visibles.

3-La libération des 289 prisonniers délictueux

Le chef de l’Etat a franchi un autre pas dans la tentative du pouvoir de résorber le conflit dans la partie anglophone du pays. En élargissant 289 prisonniers dans le cadre de ce conflit, l’opinion pense généralement qu’il s’agit d’une mesure d’apaisement. Si tel est le cas, en quoi la libération des prisonniers va-t-il inciter les séparatistes à déposer les armes ? Une certitude est que la décision présidentielle est un couteau à double tranchant. D’un côté, ces jeunes gens qui sortent des prisons sont pour l’essentiel des victimes de guerre qui pour l’essentiel ont perdu tout dans cette guerre et sont parfois entièrement déconnectés de tout lien familial. De tels jeunes sont accrocs à la violence, surtout pour ceux qui ont été témoins de l’assassinat d’un des leurs. Dans un contexte de guerre, les jeunes gens acquièrent rapidement le statut d’adulte par la consommation à outrance de la violence.

**[Lire aussi](https://www.237online.com/municipale-2020-les-sous-prefets-proclament-les-resultats-en-lieu-et-place-de-elecam/" \t "_self)**

**[Municipale 2020 : les sous-préfets proclament les résultats en lieu et place de Elecam](https://www.237online.com/municipale-2020-les-sous-prefets-proclament-les-resultats-en-lieu-et-place-de-elecam/" \t "_self)**

Généralement pour les incorporer dans les rangs, certains les font abattre des hommes de sang-froid. Ahmadou Kourouma en parle avec aisance dans son ouvrage, Allah n’est pas obligé ! Un tel forfait commis, ce jeune ne peut plus revenir en arrière pour opérer des réparations. Le mal est fait. De l’autre côté, ces jeunes gens ont mesuré la puissance qui est la leur lorsqu’ils sont en possession d’une arme. Ils sont de ce fait attachés à l’arme et l’affectionnent parce qu’ils savant le pouvoir qui est au bout du canon. Heureusement que la décision présidentielle précise qu’il s’agit des jeunes gens qui ont commis des actes délictueux, c’est-à-dire de moindre gravité. Mais, on ne perd pas de vue que dans une guerre asymétrique où les enfants et les femmes sont en première ligne, et généralement à mains nues, l’arme n’est jamais loin. Les hommes en tenue sont généralement très vulnérables dans un tel contexte parce que le droit de la guerre (le jus in bello) leur interdit de faire feu sur les enfants, les femmes, bref sur les civils qui ne sont pas en situation de belligérance. On est rassuré par les propos du ministre délégué à la présidence de la République chargé de la Défense qui a précisé qu’aucun criminel, ni terroriste ou autre personnel coupable de violences graves ne sera élargi. En dépit de tout ceci, on doit toujours poser une question : pour quels résultats ? Quelle est la stratégie gouvernementale globale dans ce conflit ?

A première vue, on a cette triste impression que le pouvoir pose des actions en pointillé, c’est-à-dire qu’on va d’une action à l’autre sans bien cerner les contours de la précédente. Cette fâcheuse situation peut créer un enlisement et même fragiliser le pouvoir dans la zone. La tendance générale est que l’opinion demande à cors et à cris aux autorités d’organiser un dialogue. Dans un tel cadre, le pouvoir tiendrait tous les leviers pour donner le contenu qui lui conviendrait à une telle assise. Si l’option d’un dialogue est actée, il va de soi que les stratèges ou les acteurs de l’ombre vont s’inviter à table. Et cela ne sera que bénéfique pour la sécurité dans les deux régions.

4-Le plan humanitaire d’urgence

Ce plan mis sur pied par le chef de l’Etat vise à apporter une aide multiforme aux populations victimes de la guerre dans la partie troublée du pays. Le budget de ce plan est de 12,7 milliards de FCFA. Il doit être exécuté sur une période de 18 mois. La générosité des Camerounais avait été mise à contribution. De la collecte qui avait commencé officiellement le 21 juin 2018, on se demande ce qu’il en est advenu plus de cinq mois après. Les Camerounais victimes de cette guerre se sont déplacées par dizaines de milliers au Nigeria. Sur le plan interne, les déplacés sont plus nombreux, créant une situation de vulnérabilité pour ces populations obligées de fuir de leur cadre de vie. Les maisons, les écoles, les commissariats, et d’autres biens sont brûlés. Comment reconstruire si le plan d’urgence ne se met pas rapidement en branle ? Et comment se mettrait-il en route s’il n’y a pas la paix ? Comme on le voit, la crise anglophone se porte toujours très bien en dépit des différentes mesures étatiques.

C’est ici le lieu de se demander lien qui existe entre ces différentes initiatives. Le plan humanitaire d’urgence la première des trois, n’est pas encore dans sa phase active, que déjà voici le pouvoir qui créé le Comité national de désarmement, de démobilisation et de réintégration. A peine est-elle en phase de mise en place que le chef de l’Etat décide d’élargir 289 prisonniers dans le cadre de la crise anglophone. On se demande dès lors quel est le fil conducteur de ces différentes initiatives ? C’est évidemment le règlement de ce conflit mais, à accumuler les initiatives les unes après les autres, on se perd sur le chemin de l’efficience. Plus de deux ans qu’elle a commencé, le conflit dans les deux régions anglophones du pays continue de plus belle sans que l’une des décisions de Paul Biya vienne à la résorber. Il devient une urgence au Cameroun de réviser le système d’intelligence dans la gestion de ce conflit qui touche sérieusement les intérêts du pays et en partant, fait tout le malheur du Cameroun

<https://www.237online.com/cameroun-crise-anglophone-la-strategie-en-pointille-de-paul-biya/>

1. **Crise anglophone: 12 étudiants enlevés à Bamenda par les « ambazoniens »**

[**237online**](https://www.237online.com/author/237online/)12 décembre 2018

 Temps de lecture 1 minute

[Pinterest](https://pinterest.com/pin/create/button/?url=https://www.237online.com/crise-anglophone-12-etudiants-enleves-a-bamenda-par-les-ambazoniens/&description=Crise%20anglophone%3A%2012%20%C3%A9tudiants%20enlev%C3%A9s%20%C3%A0%20Bamenda%20par%20les%20%C2%AB%C2%A0ambazoniens%C2%A0%C2%BB&media=https://www.237online.com/wp-content/uploads/2018/10/bamenda-university.jpg) [Reddit](https://reddit.com/submit?url=https://www.237online.com/crise-anglophone-12-etudiants-enleves-a-bamenda-par-les-ambazoniens/&title=Crise%20anglophone%3A%2012%20%C3%A9tudiants%20enlev%C3%A9s%20%C3%A0%20Bamenda%20par%20les%20%C2%AB%C2%A0ambazoniens%C2%A0%C2%BB)

5 filles, 7 garçons c’est le nombre d’étudiants de l’Université de Bamenda enlevés hier mardi 11 décembre 2018 à Bamenda alors qu’ils allaient aux cours à croire à la vidéo ci-dessous.

Un regard hagard, signe de psychose se lit sur le visage de cette dizaine de jeunes. Les séparatistes Ambazoniens qui les ont pris en otage disent vouloir passer un message fort aux étudiants de l’Université de Bamenda qui ne prennent pas leur avertissement de ne plus se rendre au campus au sérieux.

Ils font la promesse de libérer ceux enlevés mais souligne que les prochains étudiants qu’ils arrêtont seront tout simplement assassinés car, fustigent-ils il ne peuvent pas mettre un terme à l’école pour se battre pour la libération de l’Ambazonie quand les autres vont à l’école.

Hier en journée on voyait dans une vidéo les étudiants de l’Université de Bambili à Bamenda qui couraient partout au campus lorsque les Ambazoniens y ont fait irruption et ont commencé à tirer en l’air.

<https://www.237online.com/crise-anglophone-12-etudiants-enleves-a-bamenda-par-les-ambazoniens/>

1. **Etat au Cameroun : La Crise anglophone à l’origine d’un roman sur la mal gouvernance**

[**237online**](https://www.237online.com/author/237online/)5 décembre 2018

 6 minutes de lecture

[Pinterest](https://pinterest.com/pin/create/button/?url=https://www.237online.com/etat-au-cameroun-la-crise-anglophone-a-lorigine-dun-roman-sur-la-mal-gouvernance/&description=Etat%20au%20Cameroun%20%3A%20La%20Crise%20anglophone%20%C3%A0%20l%E2%80%99origine%20d%E2%80%99un%20roman%20sur%20la%20mal%20gouvernance&media=https://www.237online.com/wp-content/uploads/2018/10/secessionnistes-Bamenda.jpg) [Reddit](https://reddit.com/submit?url=https://www.237online.com/etat-au-cameroun-la-crise-anglophone-a-lorigine-dun-roman-sur-la-mal-gouvernance/&title=Etat%20au%20Cameroun%20%3A%20La%20Crise%20anglophone%20%C3%A0%20l%E2%80%99origine%20d%E2%80%99un%20roman%20sur%20la%20mal%20gouvernance)

Des jeunes chercheurs ont eu l’audace de mettre en débat la question de la forme de l’Etat, dans un ouvrage collectif codirigé par le père Ludovic Lado et préfacé par le Cardinal Tumi.

Voici un livre qui prend les allures d’une scène de tribunal. Ici, on argumente sur la crise sociopolitique qui secoue depuis deux ans les régions du Nord-Ouest et du Sud-Ouest du Cameroun. La forme de l’Etat est en débat dans l’ouvrage collectif qui porte le sous-titre suivant : Le procès du centralisme étatique. Etat centralisé ? Etat unitaire décentralisé ? Fédéralisme ? Ou sécessionnisme ? Chacun auteur a pris sa plume et s’est prononcé. L’accord est loin d’être trouvé entre les neuf chercheurs en sciences sociales, mais ils discutent par la force de l’argumentaire. Le plus connu de tous est le prêtre jésuite Ludovic Lado. Par ses écrits antérieurs, il s’est positionné comme un dissident vis-àvis de l’ordre politique établi à Yaoundé. Mais cette fois, il codirige un ouvrage scientifique. Sa casquette est donc celle du docteur en anthropologie sociale et culturelle. C’est la science qui le ramène à l’autre directeur : le sociologue Edmond VII Mballa Elanga, plus connu pour ses positions en faveur du régime. Il est chargé de cours à l’Université de Douala. A ces deux universitaires plus capés, se sont joint des jeunes chercheurs qui, pour certains, écrivent encore leur thèse de doctorat. Ce sont des « no name » qui prennent la posture de l’intellectuel, selon Christian Tumi. Le Cardinal signe la préface et se réjouit de lire des citoyens ayant choisi de mettre leur intelligence « au service de la vérité et de la justice. »
Pourtant, il est difficile d’établir une vérité au terme de la lecture des 239 pages de cet ouvrage paru en novembre dernier aux Editions du Schabel à
Yaoundé. Tout de même, on en sort édifié sur les acteurs en présence dans la crise dite anglophone, sur leurs stratégies et sur les positionnements. Trois acteurs majeurs sont identifiés par le doctorant en science politique Godefroy Nouaham Kenmogne. Il y a d’abord les autorités administratives et gouvernementales, grands défenseurs de l’Etat unitaire, qui veulent à tout prix garder la mainmise sur la gestion de la crise. Tout changement incontrôlé pourrait leur faire perdre leur position sociale ainsi que les avantages politiques et économiques qui vont avec. Ils incarnent le système gouvernant dans l’Etat néo-patrimonial où chaque subalterne doit faire une « allégeance aveugle » à la hiérarchie. Cette hiérarchie au-dessus de laquelle se trouve le président de la République. Il y a ensuite les leaders sécessionnistes du Nord-Ouest et du Sud-ouest, présentés comme des frustrés ou des marginalisés dans la répartition du gâteau national et l’exploitation des richesses. L’enjeu de la sécession est la prise du pouvoir dans l’ex Southern Cameroons et la gestion des richesses de cette partie du Cameroun. Enfin, les partis politiques ont vu l’opportunité de faire de belles affaires, soit en marchandant leur positionnement auprès du pouvoir en place, soit en s’érigeant en défenseur des intérêts de la population.

**Mal gouvernance**

Si l’enjeu de la crise est l’accès ou le contrôle des richesses, le débat sur la forme de l’Etat porte en réalité sur la gouvernance de cet Etat. Les mêmes problèmes sont soulevés d’un auteur à l’autre. Nouaham Kenmogne établit le diagnostic le plus complet : des gouvernants distants des attentes et
aspirations des populations, une absence d’initiative et d’anticipation gouvernementales, la déconfiture des entreprises publiques, l’inertie et les lenteurs dans la mise en oeuvre des reformes et des projets, le taux élevé des détournements de fonds publics et le gaspillage des ressources budgétaires, le faible taux d’accès aux services sociaux de base, un taux élevé de chômage, le faible taux d’attractivité des investisseurs privés, l’aggravation de la pauvreté, un développement régional déséquilibré, la zombification et la vassalisation des citoyens, la perte de confiance des jeunes en l’Etat, combiné à la perte de leur amour propre, l’apparition au sein de la population de sentiments de défaitisme, de fatalisme et de résignation, l’aggravation du tribalisme et la perte de la solidarité citoyenne, l’étouffement de la démocratie avec pour corollaire la disparition de l’expression plurielle au profit de la pensée monolithique. C’est de ce mélodrame que sont nées les revendications de la minorité anglophone. Celle-ci rejette sur la majorité francophone la responsabilité de la mal gouvernance de l’Etat.
Le socio-démographe Narcis Bangmo propose alors le concept de « colonialophonie », pour comprendre la cristallisation de l’opposition
Anglophone/Francophone. La colonialophonie est l’expression du repli identitaire du Camerounais anglophone. Celui-ci revendique une « identité
heureuse » qui serait le produit de la colonisation britannique, contrairement à la colonisation française qui aurait été malheureuse et serait la source des problèmes de gouvernance au Cameroun. Les faits, selon le chercheur, indiquent que la colonisation britannique a produit une culture, ainsi que des traditions institutionnelles, administratives, managériales, etc. Bref, elle a façonné une manière de faire, de vivre et de raisonner. L’anglophonie a fini par prendre les allures d’une ethnie. Pour en être membre, il ne suffit de parler anglais ou d’avoir étudié dans le sous-système éducatif anglophone. Si cette identité a été artificiellement créée et entretenue par une élite politique, il n’en demeure pas moins vrai qu’il existe une volonté populaire chez les Anglophones de parler d’une même voix indépendamment de leurs différences ethniques antérieures à la colonisation britanniques. Dans leur combat pour une cause qui semble commune, ils ont choisi de parler de ce qui les unit.

**Décentralisation contre fédération-sécession**

Si la crise donne à voir des instrumentalisations, il y a lieu de prêter attention aux mots cultes mobilisés dans la communication des acteurs. Aristide Menguele Menyengue rappelle que la communication de crise s’appuie sur ces mots mobilisateurs, qui emportent une forte croyance populaire, qui suscitent et entretiennent l’espoir du changement. C’est la bataille de l’opinion qui se joue. D’un côté, le fédéralisme est présenté comme l’idéal d’Etat face à l’échec du centralisme étatique ayant toujours prévalu depuis la réunification en 1961. Cette idéalisation est historiquement construite. En effet, elle se nourrit de la marginalisation des populations de l’ex Southern Cameroons et de la croyance en un passé heureux dans le système fédéral lorsque le territoire faisait partie de la colonie nigériane sous administration britannique. De l’autre côté, le discours des autorités sur l’accélération de la décentralisation apparait comme la réponse visant à marginaliser et discréditer l’idée de la fédération. C’est à dessein que cette forme de l’Etat est présentée comme une réalité dépassée et obsolète, et même assimilée à la sécession. Toutefois, la bataille des mots montre bien qu’un objectif a été atteint : la politisation d’un problème parti des revendications corporatistes des avocats et des enseignants. Aristide Menguele Menyengue explique que politiser une situation c’est amener l’autorité publique à la prendre en charge, c’est faire reconnaître un problème publiquement et faire admettre que son règlement revient à l’autorité. Les chercheurs portent des regards différents sur la situation ainsi politisée et instrumentalisée. Edmond VII Mballa Elanga se donne pour projet de lever certaine confusion. Ainsi, insiste-t-il à expliquer que la mal gouvernance et le sous-développement du Cameroun ne sont pas directement liés au centralisme administratif hérité de la colonisation française. Tout comme le fédéralisme n’est pas a priori la solution à tous les problèmes du Cameroun. Il semble même défendre l’idée d’un régime centralisé porté par une élite au service de la population. Pour lui, les catégories anglophone/francophone doivent être dépassées. L’histoire doit aussi cesser d’être le seul référent car, le passé est très souvent instrumentalisé et devient une source de division. Le plus important c’est de prendre en charge les réalités actuelles du Cameroun. Christian Bios Nelem ajoute que le Cameroun vit un problème national plus urgent que le débat sur la forme de l’Etat : les intrigues, la haine, la délation, la corruption, le chauvinisme ethnique, la manipulation ou encore l’enrichissement illicite. Le problème camerounais porte sur la répartition des richesses entre les classes sociales. On pourrait ajouter entre les riches et les pauvres.

**[Lire aussi](https://www.237online.com/cameroun-lapparition-de-tenor-qui-va-encore-choquer-le-public/" \t "_self)**

**[Cameroun : l’apparition de Tenor qui va encore choquer le public](https://www.237online.com/cameroun-lapparition-de-tenor-qui-va-encore-choquer-le-public/" \t "_self)**

**Aux sources du fédéralisme nigérian**

Crise anglophone ou problème camerounais. Il reste difficile d’évacuer le débat sur la forme de l’Etat. Nul ne peut nier que le centralisme, que défend Mballa Elanga, a montré ses limites. La réponse lui vient de deux chercheurs moulés dans le système anglo-saxon. Emile Kifon, le spécialiste de la gouvernance et des politiques publiques, postule que si l’Etat fédéral ne garantit pas la bonne gouvernance et le développement, il est au moins
porteur de paix, de partage de pouvoir et de responsabilité. On pourra toujours l’ajuster et l’adapter pour un meilleur vivre-ensemble dans un le pays d’aujourd’hui et de demain, rassure Sa’ah François Guimatsia qui travaille depuis des années sur les politiques en matière de bilinguisme au Cameroun. Il y a l’approche de l’expert en économie politique du développement. Herve Lado invite à découvrir le fédéralisme pratiqué au Nigeria depuis 1954 car, c’est ici que tout a commencé pour les populations de l’ex Southern Cameroons. Elles connaissent l’expérience nigériane qui leur parle encore aujourd’hui : les décisions fondamentales sur la forme de l’Etat ont toujours fait l’objet d’une conférence nationale, c’est-à-dire une assemblée inclusive de toutes les composantes sociologiques du pays. La fédération n’est pas un long fleuve tranquille et le Nigeria n’est pas une fédération achevée. Mais les populations sont jalouses du droit de pouvoir choisir leurs représentants à différents échelons et de pouvoir gérer leurs affaires locales. Il revient au Cameroun de tracer lui-même sa voie en s’inspirant des forces et des faiblesses de son grand voisin.

<https://www.237online.com/etat-au-cameroun-la-crise-anglophone-a-lorigine-dun-roman-sur-la-mal-gouvernance/>

1. **Cameroun – Crise anglophone: Plus de 30 000 camerounais réfugiés au Nigeria**

[**237online**](https://www.237online.com/author/237online/)18 novembre 2018

 3 minutes de lecture

[Pinterest](https://pinterest.com/pin/create/button/?url=https://www.237online.com/cameroun-crise-anglophone-plus-de-30-000-camerounais-refugies-au-nigeria/&description=Cameroun%20%E2%80%93%20Crise%20anglophone%3A%20Plus%20de%2030%20000%20camerounais%20r%C3%A9fugi%C3%A9s%20au%20Nigeria&media=https://www.237online.com/wp-content/uploads/2018/10/refugies-Camp.jpg) [Reddit](https://reddit.com/submit?url=https://www.237online.com/cameroun-crise-anglophone-plus-de-30-000-camerounais-refugies-au-nigeria/&title=Cameroun%20%E2%80%93%20Crise%20anglophone%3A%20Plus%20de%2030%20000%20camerounais%20r%C3%A9fugi%C3%A9s%20au%20Nigeria)

Selon un récent Rapport du Haut-Commissariat pour les Réfugiés, près de 600 personnes en situation de détresse ont rejoint les camps des déplacés au cours des deux dernières semaines.

La crise anglophone envoie chaque jour sur les chemins de l’exil des milliers de réfugiés fuyant la guerre qui fait rage entre les combattants
sécessionnistes et les soldats de l’armée régulière. La situation de ces personnes déplacées dont le nombre ne cesse de s’accroître au fil des jours tant à l’intérieur qu’à l’extérieur du pays préoccupe au plus haut point le Haut-Commissariat pour les Réfugiés.

Au cours de ces deux dernières semaines, l’afflux massif des populations du Nord-ouest et du Sud-ouest du fait de la recrudescence des violences entre les combattants sécessionnistes et les soldats de l’armée régulière a eu pour conséquence immédiate l’arrivée de près de 600 personnes en détresse dans les camps des réfugiés du côté du Nigéria.

Présentant son Rapport sur la situation des déplacés camerounais qui fuient les violences dans le Nord-ouest et le Sud-ouest, le porte-parole du Haut-Commissariat pour les réfugiés (HCR), Babar Baloch, a tiré la sonnette d’alarme. C’était au cours d’une conférence de presse tenue ce 09 novembre 2018 au Palais des Nations à Genève. « *Cette semaine, s’inquiète Babar Baloch, le nombre de réfugiés camerounais qui ont fui les violences et trouvé refuge au Nigéria a franchi le seuil des 30 000 personnes. Les réfugiés qui fuient les régions du sud-ouest et du nord-ouest du Cameroun affluent depuis septembre 2017. Ces deux dernières semaines, près de 600 personnes sont arrivées dans les installations de réfugiés*», a-t-il déclaré. Selon Babar Baloch, environ 21 000 réfugiés vivent au sein de communautés d’accueil dans 50 localités éparpillées sur 116 000 kilomètres carrés et sont hébergés dans les Etats nigérians d’Akwa Ibom, Cross River, Benue et Taraba, où la plupart sont accueillis au sein des communautés locales.

**[Lire aussi](https://www.237online.com/cameroun-crise-anglophone-lupc-soutient-loption-militaire/" \t "_self)**

**[Cameroun - Crise anglophone : L’Upc soutient l’option militaire](https://www.237online.com/cameroun-crise-anglophone-lupc-soutient-loption-militaire/" \t "_self)**

**Plus de 400 morts parmi les civils**

Autre motif d’inquiétude du Haut-Commissariat pour les Réfugiés, il se trouve que quatre réfugiés sur cinq sont des femmes et des enfants, considérés comme la couche de cette population des réfugiés la plus vulnérable. Le Haut-commissariat pour les réfugiés relève dans son rapport que la majorité des tout derniers arrivants sont originaires d’Akwaya et d’Eyumojock. Craignant pour leurs vies, ces populations en détresse auraient été contraintes d’abandonner leurs maisons et tout ce qu’elles avaient comme biens. Littéralement démunis et sans moyens de subsistance, ces réfugiés sont actuellement pris en charge par une synergie entre le HCR et le gouvernement du Nigéria, par le biais de sa Commission nationale pour les réfugiés (NCFRMI) et de l’Agence d’Etat pour la gestion des urgences (SEMA). Ces réfugiés sont hébergés dans les Etats nigérians d’Akwa Ibom, Cross River, Benue et Taraba où la plupart sont accueillis au sein des communautés locales. Autre révélation du porte-parole du HCR, 21 000 réfugiés vivent dans au sein de communautés d’accueil dans plus de 50 localités éparpillées sur plus de 116 000 kilomètres carrés. L’on imagine aisément le climat d’insécurité, les exactions et autres abus dont ces réfugiés peuvent être la cible. Raison pour laquelle, prenant en compte ces aléas, le HCR met tout en œuvre pour encourager et faciliter la relocalisation librement consentie des réfugiés des ponts de passage frontière vers les camps de réfugiés d’Adagom dans le Cross River et d’Anyake. Ces camps ont l’avantage d’offrir une plus grande sécurité et des abris de meilleure qualité, ainsi qu’un accès à des services essentiels tels que les vivres, les soins de santé et l’éducation.

**[Lire aussi](https://www.237online.com/cameroun-crise-anglophone-prelats-et-chefs-traditionnels-indexes/" \t "_self)**

**[Cameroun - Crise anglophone : Prélats et chefs traditionnels indexés](https://www.237online.com/cameroun-crise-anglophone-prelats-et-chefs-traditionnels-indexes/" \t "_self)**

Selon le HCR, la crise anglophone qui a éclaté en 2016 par des revendications corporatistes avant de virer au sécessionnisme, aurait déjà fait plus de 400 morts parmi les civils, de nombreux villages complètement dévastés et des centaines de milliers de déplacés en interne, entravant ainsi la scolarisation des enfants.

<https://www.237online.com/cameroun-crise-anglophone-plus-de-30-000-camerounais-refugies-au-nigeria/>

1. **Crise Anglophone: Paul BIYA en faveur d’une autonomie poussée des CTD dans le cadre de la Décentralisation territoriale**

[**237online**](https://www.237online.com/author/237online/)9 novembre 2018

 2 minutes de lecture

[Pinterest](https://pinterest.com/pin/create/button/?url=https://www.237online.com/crise-anglophone-paul-biya-en-faveur-dune-autonomie-poussee-des-ctd-dans-le-cadre-de-la-decentralisation-territoriale/&description=Crise%20Anglophone%3A%20Paul%20BIYA%20en%20faveur%20d%E2%80%99une%20autonomie%20pouss%C3%A9e%20des%20CTD%20dans%20le%20cadre%20de%20la%20D%C3%A9centralisation%20territoriale&media=https://www.237online.com/wp-content/uploads/2018/11/serment-biya-paul.jpg) [Reddit](https://reddit.com/submit?url=https://www.237online.com/crise-anglophone-paul-biya-en-faveur-dune-autonomie-poussee-des-ctd-dans-le-cadre-de-la-decentralisation-territoriale/&title=Crise%20Anglophone%3A%20Paul%20BIYA%20en%20faveur%20d%E2%80%99une%20autonomie%20pouss%C3%A9e%20des%20CTD%20dans%20le%20cadre%20de%20la%20D%C3%A9centralisation%20territoriale)

Comme en 2011, le Président réélu à la tête de l’État du Cameroun, a évoqué le sujet de la décentralisation dans son discours de prestation de serment, pour les 7 prochaines années.

« *Je me suis attentivement penché sur les frustrations et les aspirations de la grande majorité de nos compatriotes des régions Anglophones du Nord Ouest et du Sud Ouest. Bon nombre de réponses y sera apporté dans le cadre de l’accélération du processus de Décentralisation en cours* » a t’il déclaré.

Le Chef de l’État confirme l’option politique prise depuis le déclenchement de crise en 2016, de ne pas modifier la forme de l’État, appelée à demeurer « *Unitaire Décentralisé* » tel que consacré à l’article 1er alinéa de la Constitution de 1996.

Prenant acte de ce nouvel engagement, VIE DES COMMUNES considère qu’à l’heure actuelle, et au regard du vécu du terrain, seule une décentralisation financière robuste est à même de garantir aux Communes et bientôt aux Régions, une vraie autonomie d action leur permettant d assumer efficacement les missions qui leur sont assignées, à la grande satisfaction des populations locales.

**[Lire aussi](https://www.237online.com/cameroun-le-regne-sans-partage-du-rdpc-confirme-dans-la-sanaga-maritime/" \t "_self)**

**[Cameroun: Le règne sans partage du Rdpc confirmé dans la Sanaga Maritime](https://www.237online.com/cameroun-le-regne-sans-partage-du-rdpc-confirme-dans-la-sanaga-maritime/" \t "_self)**

Dans cet esprit, et conformément à un plaidoyer des magistrats municipaux Camerounais datant de 2014, l’État devrait accorder 10% de son budget non pas au financement de la Décentralisation avec les organes bureaucratiques dont l’efficacité est à évaluer, mais au financement des collectivités territoriales décentralisées afin que la décentralisation touche concrètement le centre de santé, l’école, la route, les déchets municipaux, l’emploi jeune et la formation professionnelle, etc.

Dans le même ordre d idées, il faudra faciliter le recours à l’emprunt des Communes et Régions Comme l’a fait la Tanzanie il y’a plus de 10 ans et donner à ces dernières un Vrai pouvoir fiscal local pour leur permettre de prélever directement taxes et impôts les plus importants sans en référer à l’État.

3 réformes pourraient faire l’objet d’une annonce dans le Message de fin d’année à la Nation du Président réélu ou avant:

- La mise en place effective des Régions comme second échelon des Collectivités territoriales décentralisées prévues à l’article X de la Constitution;
- Le financement de la décentralisation comportant un ensemble de mesures audacieuses;
- La mise en place d’une fonction publique territoriale et des réformes subséquentes comme la réforme du Cefam, les règlements des questions de chevauchement des compétences Entre communes d’arrondissement et communautés urbaines voire services déconcentrés de l’État.

**[Lire aussi](https://www.237online.com/cameroun-dimako-yves-didier-tokambou-nteme-elu-maire/" \t "_self)**

**[Cameroun - Dimako: Yves Didier TOKAMBOU NTEME élu maire](https://www.237online.com/cameroun-dimako-yves-didier-tokambou-nteme-elu-maire/" \t "_self)**

Sans des mesures fortes allant dans le sens du renforcement de l’autonomie administrative et surtout financière des Communes et des Régions, avec un vrai contrôle de leur gestion par l’État central et en premier lieu les citoyens à la base, la décentralisation, qu’on brandit comme la solution à la crise Anglophone (ce qui est inexact en raison de la complexité du problème et des .mentalités dans le système actuel de gouvernance qui plombent l’efficacité de l’État) risque, à moyenne échéance, désenchanter une fois de plus les Camerounais après les promesses qui leur ont avaient été faites dans les années 90 avec cette même décentralisation, au moment où des revendications séparatistes et fédéralistes battaient leur plein d’une part, et sous la pression des institutions de Bretton Woods (Fmi et Banque mondiale) d’autre part. A bon entendeur…

**Some Enrique Emmanuel, 237online.com**

<https://www.237online.com/crise-anglophone-paul-biya-en-faveur-dune-autonomie-poussee-des-ctd-dans-le-cadre-de-la-decentralisation-territoriale/>

1. **Cameroun-Crise anglophone: Le sous-préfet de Noni kidnappé par des présumés séparatistes**

[**237online**](https://www.237online.com/author/237online/)7 novembre 2018

 Temps de lecture 1 minute

[Pinterest](https://pinterest.com/pin/create/button/?url=https://www.237online.com/cameroun-crise-anglophone-le-sous-prefet-de-noni-kidnappe-par-des-presumes-separatistes/&description=Cameroun-Crise%20anglophone%3A%20Le%20sous-pr%C3%A9fet%20de%20Noni%20kidnapp%C3%A9%20par%20des%20pr%C3%A9sum%C3%A9s%20s%C3%A9paratistes&media=https://www.237online.com/wp-content/uploads/2018/11/separatistes-anglophones.jpg) [Reddit](https://reddit.com/submit?url=https://www.237online.com/cameroun-crise-anglophone-le-sous-prefet-de-noni-kidnappe-par-des-presumes-separatistes/&title=Cameroun-Crise%20anglophone%3A%20Le%20sous-pr%C3%A9fet%20de%20Noni%20kidnapp%C3%A9%20par%20des%20pr%C3%A9sum%C3%A9s%20s%C3%A9paratistes)

Depuis le samedi, 3 novembre 2018, l’on est sans nouvelle de Nwa Martin Nanjong, le sous-préfet de l’arrondissement de Noni, dans le département du Bui, région du Nord-Ouest.

Selon des sources concordantes, il a été kidnappé par des hommes armés, alors qu’il revenait de Bamenda.

Administrateur civil ayant travaillé par le passé dans la chaudière de Balik*umbat, département du Ngoketunjia, il était en poste depuis le 4 septembre 2017, suite au décret présidentiel n°2017/461 nommant des sous-préfets. Après les sous-préfets de Batibo, de Ngye, de Misaje et Menchum Valley, Nwa Martin Nanjong est le cinquième sous-préfet attaqué dans cette région par des présumés séparatistes. Mis à part le cas inextricable de Namata Diteng, ex-sous-préfet de Batibo, d’autres avant lui ont eu la chance d’être relaxés saufs.

<https://www.237online.com/cameroun-crise-anglophone-le-sous-prefet-de-noni-kidnappe-par-des-presumes-separatistes/>

1. **Crise anglophone: Les séparatistes promettent la libération des 80 lycéens enlevés**

[**237online**](https://www.237online.com/author/237online/)7 novembre 2018

 Moins d’une minute

[Pinterest](https://pinterest.com/pin/create/button/?url=https://www.237online.com/crise-anglophone-les-separatistes-promettent-la-liberation-des-80-lyceens-enleves/&description=Crise%20anglophone%3A%20Les%20s%C3%A9paratistes%20promettent%20la%20lib%C3%A9ration%20des%2080%20lyc%C3%A9ens%20enlev%C3%A9s&media=https://www.237online.com/wp-content/uploads/2018/11/separatistes-anglophones.jpg) [Reddit](https://reddit.com/submit?url=https://www.237online.com/crise-anglophone-les-separatistes-promettent-la-liberation-des-80-lyceens-enleves/&title=Crise%20anglophone%3A%20Les%20s%C3%A9paratistes%20promettent%20la%20lib%C3%A9ration%20des%2080%20lyc%C3%A9ens%20enlev%C3%A9s)

Les forces séparatistes du Cameroun affirment avoir secouru près 80 lycéens enlevés lundi d’une école secondaire.

Ces élèves devraient être rendus à leurs parents mardi matin, a déclaré à VOA Chris Anu, le porte-parole du mouvement se réclamant de la république autoproclamée d’Ambazonie.

Le ministre de l’Information camerounais, Issa Tchiroma Bakary a, à de son côté, affirmé lundi n’avoir pas connaissance de la libération de ces élèves.

M. Anu a nié que les séparatistes aient enlevés ces lycéens. Il a plutôt accusé l’armée de camerounaise.

<https://www.237online.com/crise-anglophone-les-separatistes-promettent-la-liberation-des-80-lyceens-enleves/>

1. **Cameroun – Crise Anglophone: 1000 soldats nigérians en renfort aux frontières**

[**237online**](https://www.237online.com/author/237online/)27 octobre 2018

 Temps de lecture 1 minute

[Pinterest](https://pinterest.com/pin/create/button/?url=https://www.237online.com/cameroun-crise-anglophone-1000-soldats-nigerians-en-renfort-aux-frontieres/&description=Cameroun%20%E2%80%93%20Crise%20Anglophone%3A%201000%20soldats%20nig%C3%A9rians%20en%20renfort%20aux%20fronti%C3%A8res&media=https://www.237online.com/wp-content/uploads/2018/10/nigeria-police.jpg) [Reddit](https://reddit.com/submit?url=https://www.237online.com/cameroun-crise-anglophone-1000-soldats-nigerians-en-renfort-aux-frontieres/&title=Cameroun%20%E2%80%93%20Crise%20Anglophone%3A%201000%20soldats%20nig%C3%A9rians%20en%20renfort%20aux%20fronti%C3%A8res)

De source sécuritaire, on apprend que le gouvernement fédéral du Nigeria a lancé une opération militaire dans l’Etat du Cross River frontalier à la région du Sud-Ouest du Cameroun le 23 octobre.

Il est question de bloquer le trafic des armes et le recrutement des mercenaires par les séparatistes camerounais.

L’armée nigériane a lancé une opération militaire dans l’Etat du Cross River frontalière avec le Sud-ouest Cameroun. Cette opération consiste à bloquer les approvisionnements des armes destinées aux sécessionnistes des régions anglophones du Cameroun.

Bien plus, il est question d’empêcher les séparatistes camerounais de recruter les mercenaires Nigéria afin de venir combattre à leurs côtés.Ainsi, plusieurs routes terrestres sont déjà identifiées par l’armée nigériane. C’est par ces routes que passent l’essentielle des armes destinées aux séparatistes.

La mission qui compte environ 1000 soldats nigérians va dont construire dans le cadre de cette opération des bases militaire et d’observation le long de ces routes pour garantir de manière permanente la sécurité.

De plus, l’armée va sensibiliser les populations notamment les jeunes afin de ne pas se faire enrôler par les terroristes ambazonien. Car ces derniers sont responsables de nombreuses exactions dans les régions anglophones du Cameroun.

<https://www.237online.com/cameroun-crise-anglophone-1000-soldats-nigerians-en-renfort-aux-frontieres/>

1. **Cameroun-Crise Anglophone: 23 sécessionnistes abattus par les Forces de Défense**

[**237online**](https://www.237online.com/author/237online/)19 octobre 2018

 Temps de lecture 1 minute

[Pinterest](https://pinterest.com/pin/create/button/?url=https://www.237online.com/cameroun-crise-anglophone-23-secessionnistes-abattus-par-les-forces-de-defense/&description=Cameroun-Crise%20Anglophone%3A%2023%20s%C3%A9cessionnistes%20abattus%20par%20les%20Forces%20de%20D%C3%A9fense&media=https://www.237online.com/wp-content/uploads/2018/10/terroriste-arrete.jpg) [Reddit](https://reddit.com/submit?url=https://www.237online.com/cameroun-crise-anglophone-23-secessionnistes-abattus-par-les-forces-de-defense/&title=Cameroun-Crise%20Anglophone%3A%2023%20s%C3%A9cessionnistes%20abattus%20par%20les%20Forces%20de%20D%C3%A9fense)

Au moins 23 séparatistes armés que Yaoundé qualifie de « terroristes », ont été tués entre jeudi et vendredi par les forces de défense et de sécurité dans plusieurs affrontements, a-t-on appris de source sécuritaire autorisée.

A Ndop, dans le département du Ngo-Ketundja, région du Nord-ouest, dix-sept séparatistes ont été tués et deux autres capturés ce jeudi. Des engins roulants, des appareils de communication ainsi que des armes et munitions ont été saisis jeudi lors d’une opération de l’armée.
« Les séparatistes ont ouvert le feu au moment où les forces de sécurité leur demandaient de se rendre. Ceux qui se sont rendus ont été capturés. Ils sont en cours d’exploitation », déclare le Colonel chef de la division Communication au ministère de la défense.

Dans le même temps, cinq séparatistes ont été tués dans la petite localité de Moudoum à 35 km de Bafut, région du Nord-ouest.
Les régions du Nord-ouest et du Sud-ouest, majoritairement peuplées des camerounais d’expression anglaise sont secouées depuis fin octobre 2016 par des revendications sociopolitiques qui ont débouché sur des affrontements entre forces de défense et de sécurité et gangs armés revendiquant la sécession du Cameroun.
Selon des avocats, le domicile de John Fru Ndi chef du SDF, principal parti de l’opposition parlementaire a été incendié par des individus non identifiés.
« Sa sœur a été enlevée, on n’ignore où elle se trouve », ont poursuivi les avocats du SDF devant le conseil constitutionnel.
Ces avocats plaidaient pour l’annulation totale du scrutin indiquant que dans les deux régions du Nord-ouest et du Sud-ouest, les électeurs étaient menacés de mort.

Les séparatistes avaient menacé de mort tout électeur qui se rendrait aux urnes le 7 octobre 2018.
« John Fru Ndi avait effectivement voté à Bamenda », ont confié les avocats du SDF

<https://www.237online.com/cameroun-crise-anglophone-23-secessionnistes-abattus-par-les-forces-de-defense/>

1. **Cameroun – Présidentielle 2018: Paul Biya, grand favori malgré la crise anglophone et 38 ans de pouvoir**

[**237online**](https://www.237online.com/author/237online/)6 octobre 2018

 3 minutes de lecture

[Pinterest](https://pinterest.com/pin/create/button/?url=https://www.237online.com/cameroun-presidentielle-2018-paul-biya-grand-favori-malgre-la-crise-anglophone-et-38-ans-de-pouvoir/&description=Cameroun%20%E2%80%93%20Pr%C3%A9sidentielle%202018%3A%20Paul%20Biya%2C%20grand%20favori%20malgr%C3%A9%20la%20crise%20anglophone%20et%2038%20ans%20de%20pouvoir&media=https://www.237online.com/wp-content/uploads/2018/10/biya-depart-usa.jpg) [Reddit](https://reddit.com/submit?url=https://www.237online.com/cameroun-presidentielle-2018-paul-biya-grand-favori-malgre-la-crise-anglophone-et-38-ans-de-pouvoir/&title=Cameroun%20%E2%80%93%20Pr%C3%A9sidentielle%202018%3A%20Paul%20Biya%2C%20grand%20favori%20malgr%C3%A9%20la%20crise%20anglophone%20et%2038%20ans%20de%20pouvoir)

Plus de 6,5 millions de Camerounais sont appelés dimanche à élire leur nouveau président, pour donner ou non un septième mandat à Paul Biya, 85 ans dont 35 au pouvoir, lui qui part favori malgré de très fortes tensions dans les régions anglophones du pays.
Jamais une élection camerounaise n’avait pris place alors que l’armée est déployée dans trois des dix régions du pays: l’Extrême-Nord, où elle combat les jihadistes de Boko Haram, et les deux régions anglophones du Nord-Ouest et du Sud-Ouest, où des séparatistes armés réclament l’indépendance.
Ceux-ci ont menacé d’empêcher le bon déroulement du scrutin dans ces régions quadrillées par les forces de l’ordre et de sécurité.
Yaoundé se veut rassurant: le scrutin aura lieu sur tout le territoire, a assuré le ministre de l’Administration territoriale mi-septembre, et ces conflits armés ne sont que des « troubles », selon Paul Biya.
Pourtant, le conflit contre les combattants séparatistes n’a cessé de prendre de l’ampleur depuis le début de la crise, fin 2016. À l’époque, des revendications corporatistes anglophones avaient mené à des manifestations et de nombreuses arrestations.
Larvée, cette crise d’abord socio-politique s’est peu à peu muée en un violent conflit armé opposant les troupes d’élite des forces de sécurité camerounaises à des séparatistes armés de plus en plus nombreux.
Multipliant les attaques contre les symboles de l’État, gendarmeries en tête, et les enlèvements de fonctionnaires, ces groupes ont forcé de nombreuses autorités locales à fuir leur administration dans certaines localités anglophones.
Réponse des autorités: certains bureaux de vote seront « délocalisés », a affirmé dans les médias Elecam, l’organe chargé d’organiser le vote.

**« Large offre politique »**
Le président-candidat Paul Biya, qui, pour la première fois depuis 2012, s’est rendu en province pour tenir un meeting pré-électoral, samedi à Maroua (nord), peut compter sur une myriade de soutiens pour faire campagne pour lui.
Ministres, cadres du parti au pouvoir, chefs traditionnels: comme par le passé, il a su mobiliser. Partout, des affiches à son effigie ont été postées et ses soutiens vont de plateau télévisé en plateau télévisé défendre son bilan.
Sa « vision pour le Cameroun », compilée dans un ouvrage en 1987, a de même été réédité début septembre.
Discret sinon, le président Biya a prôné à Maroua « à la fois fermeté et dialogue » dans les zones anglophones en crise.
Huit candidats espèrent renverser par les urnescelui qu’on appelle au Cameroun le « Sphinx ». Et contrairement aux trois dernières élections pour lesquelles l’opposant de toujours, Ni John Fru Ndi, était le principal challenger, le scrutin semble en 2018 plus ouvert.
« C’est la première fois dans l’histoire du Cameroun qu’il y a des candidats d’opposition aussi démarqués, qui ont de vraies offres politiques chacune différente », estime Fred Eboko, politologue camerounais à l’Institut de recherche et développement (IRD).
Trois hommes se démarquent: Joshua Osih, qui a repris le flambeau de Fru Ndi et a été investi candidat du Social Democratic Front (SDF, principal parti d’opposition), Maurice Kamto, ancien ministre passé dans l’opposition qui bénéficie d’une forte assise territoriale, et Akere Muna, avocat célèbre qui dispose de bons relais à l’étranger.
Aucune coalition de l’opposition n’a été formée pour cette élection à un tour, chacun se disant sûr de ses chances d’être élu.
Comme en 2011, il semble néanmoins compliqué d’entrevoir une victoire d’un candidat de l’opposition. À l’époque, Biya avait été réélu avec 77,98% des suffrages, et Paris comme Washington avaient noté de « nombreuses irrégularités » lors du scrutin.
Les candidats d’opposition, l’Église catholique, et certains acteurs de la société civile ont annoncé qu’ils déploieraient des observateurs électoraux pour s’assurer qu’il n’y ait pas de fraude.
Dans ce pays où seuls 10% des actifs ont un emploi formel, un tiers des habitants vit avec moins de 2 euros par jour et 75% de la population n’a connu comme président que Biya, les défis du nouveau chef de l’État seront immenses.

<https://www.237online.com/cameroun-presidentielle-2018-paul-biya-grand-favori-malgre-la-crise-anglophone-et-38-ans-de-pouvoir/>

1. **Cameroun – Crise anglophone : six présumés séparatistes tués à Ndop**

[**237online**](https://www.237online.com/author/237online/)6 octobre 2018

 Temps de lecture 1 minute

[Pinterest](https://pinterest.com/pin/create/button/?url=https://www.237online.com/cameroun-crise-anglophone-six-presumes-separatistes-tues-a-ndop/&description=Cameroun%20%E2%80%93%20Crise%20anglophone%20%3A%20six%20pr%C3%A9sum%C3%A9s%20s%C3%A9paratistes%20tu%C3%A9s%20%C3%A0%20Ndop&media=https://www.237online.com/wp-content/uploads/2018/10/armee-3.jpg) [Reddit](https://reddit.com/submit?url=https://www.237online.com/cameroun-crise-anglophone-six-presumes-separatistes-tues-a-ndop/&title=Cameroun%20%E2%80%93%20Crise%20anglophone%20%3A%20six%20pr%C3%A9sum%C3%A9s%20s%C3%A9paratistes%20tu%C3%A9s%20%C3%A0%20Ndop)

L’armée camerounaise a neutralisé des combattants sécessionnistes lors d’un raid effectué dans le département du Ngoketunjia, région du Nord-Ouest du Cameroun.
Les forces de sécurité ont opéré un raid vendredi dernier dans une zone soupçonnée d’être un foyer des sécessionnistes. Lors de l’opération, il y a eu une fusillade au cours de laquelle les soldats auraient réussi à détruire le camp ciblé et tué six séparatistes présumés. Des armes et des munitions y ont été saisies et des barrages routiers érigés par les séparatistes ont été détruits.
Toujours dans le département du Ngoketunjia, l’épouse du chef de Baba 1 et ses quatre enfants ont été enlevés par des hommes armés non identifiés. Ces derniers ont demandé une rançon de 10 millions de francs CFA.
Quatre autres inconnus armés auraient perdu la vie ce dimanche 30 septembre dans un affrontement avec les forces de sécurité dans la localité de Tatum (département du Bui). Cette bataille est survenue après la mort d’un gendarme qui serait sorti s’amuser, allant ainsi à l’encontre de la consigne de ne pas quitter le camp.
Suite à cet incident, le préfet de Nk*um aurait ordonné le déploiement de plus de troupes dans le secteur alors que certains habitants ont accusé l’armée d’avoir incendié des maisons et des boutiques dans le marché.
La région du Nord-Ouest est toujours la cible de plusieurs attaques, malgré le couvre-feu et les villes mortes instaurés par les autorités administratives. Les populations désertent pour chercher des refuges dans les localités voisines.

<https://www.237online.com/cameroun-crise-anglophone-six-presumes-separatistes-tues-a-ndop/>

1. **Cameroun – Valsero : « Voter Paul Biya n’aura aucun impact sur la crise anglophone »**

[**237online**](https://www.237online.com/author/237online/)6 octobre 2018

 7 minutes de lecture

[Pinterest](https://pinterest.com/pin/create/button/?url=https://www.237online.com/cameroun-valsero-voter-paul-biya-naura-aucun-impact-sur-la-crise-anglophone/&description=Cameroun%20%E2%80%93%20Valsero%20%3A%20%C2%AB%20Voter%20Paul%20Biya%20n%E2%80%99aura%20aucun%20impact%20sur%20la%20crise%20anglophone%20%C2%BB&media=https://www.237online.com/wp-content/uploads/2018/10/valsero-general.jpg) [Reddit](https://reddit.com/submit?url=https://www.237online.com/cameroun-valsero-voter-paul-biya-naura-aucun-impact-sur-la-crise-anglophone/&title=Cameroun%20%E2%80%93%20Valsero%20%3A%20%C2%AB%20Voter%20Paul%20Biya%20n%E2%80%99aura%20aucun%20impact%20sur%20la%20crise%20anglophone%20%C2%BB)

Gaston Abe à l’état civil, le rappeur camerounais, connu pour ses critiques acerbes contre le régime en place, est à la tête d’une association baptisée « Our destiny » qui a pour but principal de mobiliser des jeunes volontaires en cette période électorale afin de participer au vote et avoir une influence sur le choix du futur président de la République.
**D’où vous est venue l’idée de demander aux jeunes camerounais de ne pas voter pour le candidat Paul Biya en cette période électorale?**
Je n’ai pas pris la décision de demander aux jeunes de ne pas voter le candidat Paul Biya pour cette élection. Je pense simplement que je n’ai jamais été pour le candidat Paul Biya. J’ai toujours milité contre lui. Je prends beaucoup de plaisir à dire que je suis contre l’opposition et je pense que j’en avais marre d’être de l’opposition tout seul. Les raisons pour lesquelles je suis de l’opposition, c’est à cause de cette misère ambiante qui paralyse la jeunesse même dans son avenir. C’est pourquoi nous, à « Our destiny » nous avons pris la ferme décision d’emmener plein de jeunes avec nous, parce-que on s’est rendu compte qu’après 10, 15 ans, être un opposant tout seul c’est un problème. Mais vous ne pouvez pas juste crier pour un million de personnes. Nous voulons mobiliser le maximum de voix possible. Cette voix qui va dire « non ! », « nous ne sommes pas un parti politique mais une entité. Nous sommes une force avec le pouvoir de choisir et on a choisi l’opposition. L’opposition c’est une manière de penser, c’est l’envie de faire autre chose. Donc c’est pour cette raison qu’on a mené cette campagne baptisée « je suis l’opposition camerounaise ».

**Qu’est-ce que vous mettez concrètement dans l’opposition?**
Pour moi, l’opposition c’est d’abord l’idée de changement. Avant de coller un visage à cette idée, c’est d’abord l’envie de vivre autre chose, l’envie de penser autre chose, de voir le Cameroun penser en une autre langue, une autre manière de voir. Ça, c’est déjà une partie de l’opposition. Mais si on en vient à la pratique, nous avons neuf candidats en course pour l’élection présidentielle cette année et j’ai été clair sur le sujet. Garga Haman Adji et Adamou Ndam Njoya ne font plus partie de l’opposition parce-que ce ne sont plus des noms qui me font peur. L’ouverture sur le Cameroun. Ils ne reflètent plus cette force de changement qu’on a jadis vu se dessiner à travers leur politique et leurs idéaux. Dans le cadre de « Our destiny », les visages de l’opposition camerounaise, malgré que cela soit discutable, sont Akere Muna, Maurice Kamto, Cabral Libii et Joshua Osih. L’approche qui était la nôtre était de procéder par découpage parce-que quand il y en a beaucoup, c’est difficile d’être objectif. On est passé de 4 à 8 et aujourd’hui on a 4 personnes pour représenter l’opposition.

**Quelle est l’appréciation que vous faites sur ces leaders d’opposition qui se flinguent entre eux alors qu’on attend qu’ils soient unis pour regarder vers la même direction ?**
Je pense que ce sont ces éléments qu’on prendra en compte pour pouvoir, au soir du 30 septembre, donner un mot d’ordre de vote et il faudrait bien que les gens sachent qu’on s’apprête à donner un mot d’ordre de vote, c’est pour ça qu’on travaille pour que notre parole ne soit pas seulement une parole en l’air, mais que ce soit une parole basée sur des analyses, sur des descentes de terrain sur des discussions objectives. En marge de tout cela, je produis et je présente une émission qui s’appelle « mon ami candidat » à Vox Africa. C’est une émission qui a pour but de me plonger dans la pensée et la psychologie des candidats pour essayer de comprendre comment est-ce qu’ils pensent et comment est-ce qu’ils voient le monde. Et j’ai posé la question à Maurice Kamto de savoir ce que ça lui fait de se faire bousculer en plein matin sur Radio France Internationale (Rfi) par Joshua. Il m’a répondu « je ne suis pas au courant ». Puis, je lui ai dit bien sûr ; cela veut dire que ta « meute cybernétique » ne fait pas bien le travail. C’est vous dire que les éléments que nous voyons comme la communication des partis politiques, la présentation de leurs projets, comment est-ce qu’ils font face aux difficultés sur le terrain, l’attaque des partisans, le positionnement sur la crise anglophone… Tout ça a ceci de particulier que ce sont les éléments sur lesquels mon organisation et moi-même nous allons nous appuyer pour pouvoir avoir la lourde responsabilité de dire à un jeune tu peux voter pour ce monsieur plutôt que tel autre.

**Votre association « Our destiny » soutient l’opposition. Et si cette opposition prend le pouvoir au soir du scrutin du 07 octobre prochain, que deviendra l’association ?**
Non! Je vous ai dit que « Our destiny » n’est pas une organisation qui a été créée par l’opposition. C’est une organisation qui fonctionne en fonction des contextes. Le contexte camerounais actuel est particulier. On continuera à faire nos campagnes de sensibilisation sur la lutte contre le Sida ou d’aménagement des voies publiques. Mais ça dépend du problème et du contexte. En ce moment, le Cameroun est dans l’étouffement ; on est à 36 ans d’une des dictatures les plus fermées en Afrique. On n’est plus en train de risquer la guerre, on est en pleine guerre. Le Cameroun subit toutes les agressions du monde liées à sa gouvernance. Le bon sens voudrait qu’on soit un opposant. Si jamais Paul Biya passe l’élection, ce n’est pas un indicateur qui va stopper la guerre. La question qu’on est en train de se poser est, « quelle est le candidat qui aura un impact, une influence directe sur la crise anglophone et ça, je ne crois pas que si Paul Biya gagne l’élection, ça aura un impact sur cette crise. Peut-être un accélérateur encore et seulement pour ça, on doit faire très attention car il ne s’agit pas des partis mais du pays.

**Jusqu’où êtes-vous capable d’aller? Votre engagement pourrait-il s’associer à une guerre civile? Est-ce votre idéal?**
Non! Je crois que si quelque chose s’est déjà passé, ça veut dire qu’on a une possibilité de l’éviter. Si cela s’est déjà passé en côte d’Ivoire, pourquoi est-ce que cela arriverai au Cameroun ? On est assez intelligent pour pouvoir l’éviter. Je reste persuadé que pour qu’on n’arrive pas au scénario de la cote d’Ivoire, je suis prêt à tout. Tout ce qui est humainement possible ; tout ce que mon cœur, mon corps, mon énergie et intégrité me pousseront à faire. Vous ne pouvez pas dire à un jeune de descendre dans la rue s’il n’a pas voté mais, si vous avez volé le vote d’un jeune vous le verrez dans la rue. Le problème avec la politique est que les gens savent pourquoi ils ont voté et pour qui ils ont voté. Et quand ils vont voir le nombre qu’ils sont et voir qu’ils n’ont pas gagné, là, ils sauront qu’il y a quelqu’un qui a volé le vote. En fait, le peuple est divisé.

**Quelle est donc selon vous, l’attitude à adopter ?**
Je compte déjà sur vous. Parce que c’est une idée que si vous partagez, vous pouvez la transporter et la diffuser au maximum de telle manière que tous les jeunes de tous les endroits du Cameroun se rendent compte qu’ils peuvent se mobiliser entre eux et observer l’élection. Je veux qu’ils épousent l’idée et la possibilité qu’un groupe de jeunes de Mora puisse s’asseoir entre dix ou quinze et dire : « nous on va voter dans tel bureau de vote et observer comment les gens font à Yaoundé ». Et ça, si ce sont les journalistes qui vendent bien l’idée, les jeunes se rendront compte parce qu’ils doivent savoir que même quelqu’un qui n’a pas de carte peut être un observateur.

**Quel est le regard que vous portez sur l’abstention de votre champion Bernard Njonga?**
Je crois qu’on n’avait pas la force de mener cette bagarre. On avait toutes les finances mais je pense que c’est ça qui est petit chez les Camerounais. Avoir facilement l’argent et avec l’argent, ils se lancent dans des luttes qu’ils ne peuvent pas gagner. Notre formation était extrêmement jeune, le contexte était extrêmement compliqué pour une formation aussi jeune. Il ne s’agissait pas juste de prendre un homme et dire qu’on va aller le mettre devant les gens. L’occupation de terrain nécessaire, le langage politique nécessaire pour pouvoir mener cette bagarre dans cet environnement-là, nous on ne l’avait pas. Le Crac est un parti de développement pas d’insultes. On n’avait pas les armes pour aller à cette élection.

**Depuis quelques mois, vous utilisez la musique pour sensibiliser les jeunes contre les dangers des migrations irrégulières. Parlez-nous du Concept « We are all migrants ».**
Pour restituer les choses dans le contexte, il faut dire qu’en ce moment, nous sommes sur une campagne qui est portée par l’Organisation internationale pour les migrations (Oim) qui traite des dangers liés aux migrations irrégulières. Et dans le cadre de cette campagne justement, l’association « Our destiny » en partenariat avec l’Union européenne, mène sur le terrain des campagnes de sensibilisations de la jeunesse contre les dangers liés aux migrations irrégulières. Mais « Our destiny » voit un peu plus large dans cette campagne parce qu’il s’agit d’attirer l’attention des jeunes à travers des slogans comme « je ne mourrais pas dans le désert », « je ne mourrais pas dans la Méditerranée », « je veux prendre de bonnes décisions dans ma vie ». Aussi, la campagne vise à dire aux jeunes qu’on peut utiliser le peu qu’on a pour s’en sortir. Nous interpellons aussi l’être humain parce que comme je dis toujours, ce n’est pas la mer qui part prendre des gens dans leur maison. Il y a un mécanisme humain qui fait que les êtres humains se trouvent traités comme des animaux par d’autres êtres humain et je pense qu’il faut que ça cesse. Avec « Our destiny », nous interpellons la société occidentale pour dire que nous sommes tous migrants. Mais que c’est la façon de migrer qui fait la différence. Il faut qu’on arrête la stigmatisation.

**Et pourquoi sensibiliser à travers la musique ?**
Nous sensibilisons à travers la musique parce qu’elle a une approche émotionnelle assez forte. La musique a un impact dans le changement des mentalités. C’est un bon moyen de mobilisation, de sensibilisation. Mais surtout, la musique touche un maximum de personnes. Quand vous avez sorti la musique dans le contexte de divertissement dans lequel il est plongé au Cameroun, pour le mettre dans un contexte de développement, vous voyez toutes les possibilités d’influence qu’elle peut avoir. Il faut dire qu’utiliser la musique pour passer le message est complémentaire aux autres approches. Parce que sur le terrain, il y a des campagnes directes, des communications interpersonnelles, des spots tv et radio qui sont utilisés pour appeler les jeunes à tourner le dos aux migrations irrégulières.

<https://www.237online.com/cameroun-valsero-voter-paul-biya-naura-aucun-impact-sur-la-crise-anglophone/>

1. **Cameroun – Crise anglophone : des quartiers de Yaoundé sous surveillance particulière**

[**237online**](https://www.237online.com/author/237online/)6 octobre 2018

 Temps de lecture 1 minute

[Pinterest](https://pinterest.com/pin/create/button/?url=https://www.237online.com/cameroun-crise-anglophone-des-quartiers-de-yaounde-sous-surveillance-particuliere/&description=Cameroun%20%E2%80%93%20Crise%20anglophone%20%3A%20des%20quartiers%20de%20Yaound%C3%A9%20sous%20surveillance%20particuli%C3%A8re&media=https://www.237online.com/wp-content/uploads/2018/10/yaounde-tourisme.jpg) [Reddit](https://reddit.com/submit?url=https://www.237online.com/cameroun-crise-anglophone-des-quartiers-de-yaounde-sous-surveillance-particuliere/&title=Cameroun%20%E2%80%93%20Crise%20anglophone%20%3A%20des%20quartiers%20de%20Yaound%C3%A9%20sous%20surveillance%20particuli%C3%A8re)

Particulièrement localisés dans l’arrondissement de Yaoundé 6ème, ils font l’objet de fouilles minutieuses.
Le week-end dernier, des domiciles logés dans l’arrondissement de Yaoundé 6ème ont fait l’objet de fouilles minutieuses de la police. Un habitant du quartier Etoug-Ebe a rapporté que des policiers sont entrés chez lui, ont identifié les occupants et fouillé toutes les pièces de la maison. Cette scène est familière aux populations des quartiers connus pour abriter d’importantes communautés de ressortissants du Nord-Ouest et du Sud-Ouest à Yaoundé. Ce sont par exemple, Biyem-assi, Obili, Melen, Etoug-Ebe, des quartiers concentrés dans l’arrondissement de c.
Il y a quelques mois, des rafles avaient été lieu dans quelques-unes de ces zones. Ces opérations avaient été instaurées sur la base de soupçons de présences suspectes. En effet, la crise socio-politique qui sévit dans les régions anglophones, depuis octobre 2016, pousse les populations à fuir. Celles-ci rejoignent leurs parents installés dans les villes comme Bafoussam, Douala ou encore Yaoundé. Ainsi, chaque jour- depuis plus d’un an- voit débarquer son lot de déplacés, en quête de tranquillité.
Cette situation n’est cependant pas de nature à rassurer les autorités de Yaoundé, qui craignent que des sécessionnistes aient pénétré la capitale du Cameroun et planifient des attaques. Une correspondance attribuée au ministre camerounais de la Défense, diffusée sur les réseaux sociaux hier, en porte d’ailleurs l’objet. Dans ladite missive, Joseph Beti Assomo signale au chef d’Etat-major des armées, le général Meka, que «*de nombreuses sources concordantes et généralement fiables révèlent avec insistance la présence de nombreux terroristes sécessionnistes tapis dans les domiciles de certains quartiers de la cité capitale tels que : Obili, Biyem-Assi, Etoug-Ebe et leurs environs* ».
Le contexte électoral au Cameroun pourrait favoriser le renforcement de la sécurité dans les différentes villes du pays. Ce d’autant plus que le calme n’est pas encore revenu dans les régions anglophones du Cameroun.

<https://www.237online.com/cameroun-crise-anglophone-des-quartiers-de-yaounde-sous-surveillance-particuliere/>

1. **Crise anglophone: Le Mindef Beti Assomo confirme la présence des sécessionnistes dans certains quartiers de Yaoundé**

[**237online**](https://www.237online.com/author/237online/)6 octobre 2018

 Temps de lecture 1 minute

[Pinterest](https://pinterest.com/pin/create/button/?url=https://www.237online.com/crise-anglophone-le-mindef-beti-assomo-confirme-la-presence-des-secessionnistes-dans-certains-quartiers-de-yaounde/&description=Crise%20anglophone%3A%20Le%20Mindef%20Beti%20Assomo%20confirme%20la%20pr%C3%A9sence%20des%20s%C3%A9cessionnistes%20dans%20certains%20quartiers%20de%20Yaound%C3%A9&media=https://www.237online.com/wp-content/uploads/2018/10/yaounde.JPG) [Reddit](https://reddit.com/submit?url=https://www.237online.com/crise-anglophone-le-mindef-beti-assomo-confirme-la-presence-des-secessionnistes-dans-certains-quartiers-de-yaounde/&title=Crise%20anglophone%3A%20Le%20Mindef%20Beti%20Assomo%20confirme%20la%20pr%C3%A9sence%20des%20s%C3%A9cessionnistes%20dans%20certains%20quartiers%20de%20Yaound%C3%A9)

Une correspondance du ministre délégué à la présidence chargé de la défense met en alerte le General de Corps d’armée et le Chef d’Etat-major.
Selon le Ministre Beti Assomo, des extrémistes « pourraient commettre des actions d’éclat sur des cibles à forte valeur ajoutée et certains points sensibles de la capitale politique les 1er et 07 octobre 2018 ».
A en croire Joseph Beti Assomo, certains combattants sécessionnistes qui font la guerre contre les forces de défense et de sécurité au Nord-Ouest et Sud-Ouest pour l’indépendance de ces deux Régions anglophones du pays, ont pris leurs quartiers dans la capitale politique « de nombreuses sources concordantes et généralement fiables révèlent avec insistance la présence de nombreux terroristes sécessionnistes tapis dans des domiciles de certains quartiers de la capitale tels que Obili, Biyem-assi, Etoung-Ebe, et leurs environs » avec « pour objectif de commettre des actions d’éclat sur des cibles à forte valeur ajoutée et certains points sensibles de la capitale politique les 1er et 07 octobre 2018 respectivement» explique le ministre Joseph Beti Assomo, avant d’inviter l’armée à redoubler de vigilance.
« *Je vous instruits de prendre toutes les diligences nécessaires pour préciser ce renseignement, et le cas échéant prendre des mesures appropriées pour débusquer et mettre hors d’état de nuire ces terroristes ainsi que leurs éventuels complices* » ordonne le patron délégué des forces de défense.
Avant cette correspondance du MINDEF qui a fuité, les forces de sécurités ont multiplié des fouilles minutieuses le week-end dernier dans des domiciles logés dans l’arrondissement de Yaoundé 6ème. Ce sont par exemple, Biyem-assi, Obili, Melen, Etoug-Ebe, des quartiers concentrés dans l’arrondissement de Yaoundé 6ème.

<https://www.237online.com/crise-anglophone-le-mindef-beti-assomo-confirme-la-presence-des-secessionnistes-dans-certains-quartiers-de-yaounde/>

1. **Cameroun – Crise anglophone : 18 policiers déjà tués**

[**237online**](https://www.237online.com/author/237online/)6 octobre 2018

 2 minutes de lecture

[Pinterest](https://pinterest.com/pin/create/button/?url=https://www.237online.com/cameroun-crise-anglophone-18-policiers-deja-tues/&description=Cameroun%20%E2%80%93%20Crise%20anglophone%20%3A%2018%20policiers%20d%C3%A9j%C3%A0%20tu%C3%A9s&media=https://www.237online.com/wp-content/uploads/2018/10/policier-bar.jpg) [Reddit](https://reddit.com/submit?url=https://www.237online.com/cameroun-crise-anglophone-18-policiers-deja-tues/&title=Cameroun%20%E2%80%93%20Crise%20anglophone%20%3A%2018%20policiers%20d%C3%A9j%C3%A0%20tu%C3%A9s)

En communiquant ce chiffre hier à Yaoundé, Martin Mbarga Nguele a également annoncé les mesures prises pour sécuriser les élections présidentielles.
Depuis le déclenchement de la crise socio-politique en novembre 2016 dans les régions du Nord-Ouest et du Sud-Ouest, 18 fonctionnaires de police ont déjà trouvé la mort dans le cadre de cette crise. Ce chiffre a été communiqué hier par Martin Mbarga Nguele, le délégué général à la Sûreté nationale. Il présidait la cérémonie de promotion à titre exceptionnel et de remise des épaulettes et décorations à deux fonctionnaires de police.
Parlant des policiers ayant trouvé la mort, le délégué général à la Sureté nationale a déclaré : « Ces policiers ont été attaqués violemment assassinés parce qu’ils défendaient les institutions républicaines. L’information claire et nette. Leur esprit de sacrifice et leur héroïsme vont inspirer notre action dans le rétablissement de l’ordre public ». Le patron de la police a ensuite réitéré l’engagement de ses éléments à traquer les « fauteurs de trouble ».
Par la même occasion, le délégué général à la Sureté nationale a présenté les mesures spéciales prises par le président de la République pour que les élections présidentielles prévues en octobre prochain puissent se dérouler normalement dans les deux régions qui connaissent les défis sécuritaires. Dans son discours, Martin Mbarga Nguele a ajouté : « L’élection présidentielle survient dans un contexte relativement agité avec l’épicentre, les régions du Nord-Ouest et du Sud-Ouest, où des entrepreneurs du chaos, incendient aussi bien les édifices publics que privés, procèdent aux enlèvements, des prises d’otage et assassinent des innocents.
Ces partisans du désordre projettent de perturber les élections présidentielles prévues en octobre prochain. Face à tout cela, la police a le devoir de garantir le respect de la loi et de l’ordre public. Le chef de l’Etat a débloqué à cet effet, les moyens substantiels pour le renforcement des équipements de la police et l’acquisition des moyens de protection mieux adaptés à la mutation des défis actuels de sécurité intérieure. L’ouverture sur le Cameroun. Sous la houlette des autorités administratives et en collaboration avec les autres forces de défense et de sécurité, la police assumera pleinement ses missions dans le cadre de la sécurisation du processus électoral et dans le respect des lois de la République. Ainsi face aux entrepreneurs du chaos, la police fera prévaloir la force du droit.
Face à la barbarie et au terrorisme, la police opposera la légitime défense et défendra la République et l’Etat de droit. Face au désordre et aux violences de toute sorte, elle constituera un rempart implacables », a déclaré le délégué général à la Sureté nationale.

<https://www.237online.com/cameroun-crise-anglophone-18-policiers-deja-tues/>

# Les conséquences de la crise anglophone sur l’économie du Cameroun

[**237online**](https://www.237online.com/author/237online/)6 octobre 2018

 4 minutes de lecture

[Pinterest](https://pinterest.com/pin/create/button/?url=https://www.237online.com/les-consequences-de-la-crise-anglophone-sur-leconomie-du-cameroun/&description=Les%20cons%C3%A9quences%20de%20la%20crise%20anglophone%20sur%20l%E2%80%99%C3%A9conomie%20du%20Cameroun&media=https://www.237online.com/wp-content/uploads/2018/10/bamenda-route-coupee-237online.jpg) [Reddit](https://reddit.com/submit?url=https://www.237online.com/les-consequences-de-la-crise-anglophone-sur-leconomie-du-cameroun/&title=Les%20cons%C3%A9quences%20de%20la%20crise%20anglophone%20sur%20l%E2%80%99%C3%A9conomie%20du%20Cameroun)

Un rapport du Gicam estime le manque à gagner des entreprises à plus de 269 milliards Fcfa et 6434 emplois déjà perdus.
[truncated: 594,771 more chars]
