# Supplementary material
Source: Research Square preprint supplement (doi:10.21203/rs.3.rs-8545290/v1)
Supplement: Supplementary file 5 [file 64050286bb5418887f84b25a.docx]

1. **[Lawyers, SCNC Activists Unit To End Arbitrary Arrest Of Anglophones](https://cameroonpostline.com/lawyers-scnc-activists-unit-to-end-arbitrary-arrest-of-anglophones/%E2%80%8B" \o "Permalink to: Lawyers, SCNC Activists Unit To End Arbitrary Arrest Of Anglophones)**

 AUG 30, 2016

**By Isidore Abah & Andrew Nsoseka**

*Lawyers after court sessionScores of Common Law Lawyers from the Northwest and Southwest Regions and hundreds of activists of the Southern Cameroons National Council, SCNC, August 25, stormed the Buea Magistrate Court to end what they termed “the arbitrary arrest and detention of Anglophones in Cameroon.”*

*The lawyers in unison with the SCNC activists were in Buea to lend support to some 16 SCNC activists who were arrested on July 16 in Molyko-Buea.*

*The 16 activists were rounded up by security operatives, led by Superintendent of Police, Roger Nana Ngongang, for holding an unauthorised meeting and remanded in custody.*

*When the matter came up on August 25, the President of the Buea Magistrate Court, Justice Beatrice Ntuba Bea, was astounded by the number of lawyers and members of the public who turned up for the hearing.*

*Visibly stunned by the crowed, Justice Ntuba retorted, “today we have just a single item in court; those who have no business here should kindly walk out.”*

*A few lawyers heeded her plea, but the rest stood firm.*

*Taking the floor, the Defence Counsel for the accused, Barrister Emmanuel Nkea, argued that the accused were arrested and detained under Section 231(A) of the old Penal Code.*

*This, to him, was in gross violation of the principal of legality, given that, Section 231(A) of the old Penal Code has been repelled by Section 231(1) (A) of the new Penal Code, as such, does not exist.*

*Barrister Nkea bemoaned that the SCNC activists were being unlawfully detained under an article of the law that does not exist.*

*On his part, the Prosecuting Counsel said the accused were arrested at a time when the new Penal Code was still being promulgated into law. “It was very difficult for us to have copies of the New Penal Code.”*

*Such utterances from the Prosecuting Counsel on the availability of copies of the new Penal Code enraged some of the lawyers and SCNC activists who had flood the court room.*

*They booed and jeered at the Prosecuting Counsel and ordered him to sit down that his arguments were lame. But Justice Ntuba stepped in and ordered that her court room should not be transformed into a market place.*

*In response to the Prosecuting Counsel, the Defence Counsel said he was appalled by the utterances of his learned colleague.*

*According to him, the new Penal Code was promulgated on July 12, while the accused were arrested on July 16. Barrister Nkea further asserted that his colleague should have known better that a law takes effect when it has been promulgated and not when the copies are available.*

*He prayed the court to acquit the accused, since the Prosecuting Counsel has failed to present any substantial evidence against the accused.*

*“The proceedings of the court must be in accordance with the law. The accused should be granted bail based on their status. One of them is a Third Class Chief, another a 60- year-old blind man, who cannot be imprisoned even if found guilty.*

*After spending over 40 days and nights in detention, the accused should be released on bail based on the presumption of innocence,” he stated.*

*But the Prosecuting Counsel argued that the accused pose a danger to the society and should not be released on bail.*

*Meanwhile, speaking to reporters after the hearing, Barrister Henry Kemende Gamsey, said their interest in defending the detained SCNC members is not driven by pecuniary interest, but by moral obligations.*

*“We are tired of seeing helpless Anglophones thrown into prison for little or no offences. We are resolute to put an end to this unlawful arrest and detention of Anglophones.”*

***Families Weep For Loved Ones***

While the legal battle between the Defence and the Prosecuting Counsel was on-going inside the court room, helpless mothers, fathers and children were weeping for their loved ones outside the courtroom.

One of the women, whose son was arrested, told The Post that “my child left Kumba to visit his friend in Buea only for us to hear that he has been arrested. He was supposed to round-off with his exams at GTTTC Kumba the following day.”

Another woman who was wailing outside the court room said “my son, Serge Nforne, is everything to me. He is my husband and the man of the house. I am begging the Government to release him before I die of high blood.”

Another girl, whose father has been in detention since July 16, told these reporters that her father, who is suffering from kidney problem, has not taken his medication since his arrest over a month ago. She feared that her aging father may die in custody.

After Thursday’s hearing, Justice Ntuba and her panel will decide the fates of Shey Alfred Sembe, Fokum Andrew, Moto James, Njousi Abang David, Chief Ekane Ivoson Maths, Bissong Mathias Arrey, Tabot James Arrey, Tebot Titanji Christian, Mokube Alus Ngoe, Nke Valentine, Tonjoh Peter Fehbi, Asoh Cletus, Mbua Richard and Check Nyah and others on Tuesday, August 30.

<https://cameroonpostline.com/lawyers-scnc-activists-unit-to-end-arbitrary-arrest-of-anglophones/%E2%80%8B>

1. [**President Of Wum High Court kidnapped, DO Office Razed**](https://cameroonpostline.com/president-of-wum-high-court-kidnapped-do-office-brunt/%E2%80%8B)

 AUG 24, 2018

Photo used for illustrative purpose
**By Chris MBUNWE**

*Some unidentified gunmen are reported to have kidnapped the President of the High Court of Wum, Justice Ntali Mukete Itoe, in the early hours of Wednesday, August 23 and whisked-off to an unknown destination.*

*Massive arrests and torture has been the order of the day since the incident happened. When re-enforcement was drafted in from Nkambe and Bamenda, most of the boys had escaped into the bushes, abandoning their homes and leaving behind their mothers and ground parents at the mercy of Gendarmes and elements of the Rapid Intervention Battalion, known by its French acronym as BIR.*

*Meanwhile, three weeks back, some four gendarmes were killed in Esu Wum.*

*The President of the Wum High Court, Justice Ntali Mukete Itoe, was abducted on his way to Wum where he works.
According to information The Post gnarled, Justice Mukete Itoe was identified and pulled out of a public transport vehicle plying the Bamenda-Wum Road.*

*Before we went to press, information was also emerging that the office of the DO’s office in the same area was set on fire.*

<https://cameroonpostline.com/president-of-wum-high-court-kidnapped-do-office-brunt/%E2%80%8B>

1. [**Cameroon Human Rights Situation: UN Human Rights High Commissioner Lambasts Gov’t**](https://cameroonpostline.com/cameroon-human-rights-situation-un-human-rights-high-commissioner-lambasts-govt/%E2%80%8B)

 JUL 26, 2018

**By Isidore Abah**

*Secretary General of the United Nations, António Guterres*

*Zeid Ra’ad Al Hussein, United Nations High Commissioner for Human Rights, has lambasted the Government of Cameroon over numerous reports of gross human rights violations and abuses, especially in the Northwest, Southwest and Far North Regions of the country.*

*The UN Human Rights Chief lashed out on the Government of Cameroon on Wednesday, July 25.*

*According to him, despite repeated appeals made by his office to the Government to grant its staff access to internally and externally displaced persons, especially those of the English-speaking Regions of the country to investigate allegations of human rights abuses, their requests have repeatedly fallen on death ears.*

*“Given the seriousness of violence reports against Cameroonians in the Western part of the country, we have asked for access to these persons to be able to verify allegations made against both security forces and armed elements… We will now need to explore other options, including remote monitoring…,” Zeid asserted.*

*Since the escalation of the Anglophone Crisis in 2016, and the resultant military onslaught, which the Government used to clamp down on peaceful demonstrators, there have been numerous reports about human rights abuses such as: arbitrary arrests, kidnappings, extra-judicial killings, looting, extortion, torture and excessive use of force.*

*As reports of the above-mentioned vices surged in the heat of the Crisis, over 21,000 Cameroonians fled to neighbouring Nigeria, and over 160,000 sought safe sanctuaries in other Regions of the country with some taking refuge in the forests under deplorable conditions.*

*Meanwhile, after close to two years of untold suffering and the loss of human lives, the United Nations High Commissioner for Human Rights thinks that the time to bury the hatchet is now in order to prevent more bloodshed.*

*“To prevent the situation from deteriorating further, I urge the Government to launch independent investigations into the reports of human rights violations by State security forces as well as abuses by armed elements…*

*I condemn the attacks by Cameroonian armed elements, including the ambush on 13 July near the town of Kumba in the Southwest Region on the Minister of Defence convoy. But the heavy-handed security response that the Government appears to have employed since October last year will only make matters worse for the women, children and men caught in the middle.”*

*Zeid further said he was “utterly appalled” by a horrific video reportedly showing members of the armed forces executing a woman, a child and a baby accused of being members of Boko Haram.*

*“The Government of Cameroon has an obligation to investigate this atrocious crime urgently. I am deeply worried that these killings captured on camera may not be isolated cases,” he said.*

<https://cameroonpostline.com/cameroon-human-rights-situation-un-human-rights-high-commissioner-lambasts-govt/%E2%80%8B>

1. [**Gov’t Announces 12.7 Billion Humanitarian Plan For NW, SW Regions**](https://cameroonpostline.com/govt-announces-12-7-billion-humanitarian-plan-for-nw-sw-regions/%E2%80%8B)

 JUN 22, 2018

**By Sylvester Atemnkeng**

*Prime Minister, Philemon Yang*

*The Government of Cameroon has announced an FCFA 12.7 Billion Emergency Humanitarian Assistance Plan for the Northwest and Southwest Regions.*

*The plan was unveiled on June 20 by Prime Minister and Head of Government, Philemon Yang, during a press briefing in the conference room of his cabinet.*

*The call for solidarity to finance the humanitarian plan, according to the Prime Minister, is not new, because, a similar show was recorded in the case of the humanitarian crisis caused by Boko Haram.*

*Going by the PM, areas of priority will include: Protection of displaced persons; food and basic needs; healthcare; education; the resumption of the economic and agricultural activities; housing and the reconstitution of individual administrative documents.*

*Statistics in the PM’s report shows that as of June 11, 2018, 123 attacks had been carried out claiming 84 lives, including 32 soldiers, 42 gendarmes, 7 police officers, 2 prison warders and 1 eco-guard assassinated in a cowardly manner.*

*Several victims were mutilated or beheaded and their corpses displayed on social media.
“These devoted civil servants, whose job was to protect citizens and their property, died in the discharge of their sacred duties. Their comrades are carrying on with their duty to preserve peace and the safety of the population with courage and determination,” he said.*

***Genesis Of Crisis***

Presenting the situation in the two English-speaking Regions, Yang said Cameroon has been experiencing socio-political unrest in the Northwest and Southwest Regions since 2016.

“This situation partly resulted from socio-professional grievances to which the Government, through consultation and dialogue with the relevant trade unions, provided appropriate solutions that, at times, even went beyond the expectations of the social partners.”

He said despite Government’s good will, extremists in the Diaspora and their local networks moved from socio-professional grievances to secessionist plans.

“After provoking a stalemate in dialogue by raising the stakes, engaging in intimidation and exerting various forms of pressure, they created and sustained an atmosphere of fear and tension through misinformation, dissemination of hate messages and incitement to violence. Finally, they formed armed groups and embarked on terrorist attacks against the authorities and civilian populations in a futile attempt to concretise their pipedream of partitioning Cameroon,” he said.

In addition to calls for hatred and violence on social media, going by the PM, the terrorists have committed many crimes and abuses in the Northwest and Southwest Regions, mostly against the education sector, economic activities, members of the defence and security forces, administrative and traditional authorities and, especially, the civilian population.
Fallouts Of Crisis

“The civilian populations, mostly in rural areas, have paid the highest price of the ugly war imposed by the terrorists on the Cameroonian people. Victims of numerous atrocities (assassination, theft, rape, abduction, extortion, among others) gripped by the fear created by threats, intimidations, fake news, many of them have sought refuge abroad or in other Regions of Cameroon,” he added.

Going by the PM’s presentation, although the Cameroonian people once more demonstrated their hospitality and great spirit of solidarity towards their compatriots in distress, the Government thought it necessary to prepare a structured and overall assistance plan to address the urgent and essential needs of the populations living under terrorist threats or forced to abandon their homes and their activities, and to flee from the murderous madness of these terrorists.

**The Education Sector**

The education sector, according to Yang, was and remains one of the prime terrorist targets.
“Schools are repeatedly attacked by armed terrorist groups. Students and teachers have been threatened, brutalised, mutilated and killed right in their classrooms and dormitories.

“Since the outbreak of the crisis, more than 120 schools have been burnt down in the two Regions. A bomb was planted on the premises of Presbyterian Comprehensive Secondary School Aziri in Bamenda on October 20, 2017, but it was fortunately deactivated by the security forces,” he said.

“Because of these attacks, which are part of an obscurantist and senseless strategy, thousands of students and teachers, eager to continue their educational career or their professional activities in peace, have migrated to other Regions of Cameroon. Apart from the break-up of family units, this has led to the degradation of one of the most reputed and efficient educational systems of the country and even the continent.

The consequences of such a situation will be felt for a very long time after the inevitable return to normalcy. Meanwhile, the master-minders of these terrorist acts living abroad are flooding social networks with pictures of their children celebrating the award of their certificates,” he added.

**Children As Sacrificial Lambs**

Regarding conscription of children into militia groups, the Head of Government remarked that, for some time now, child soldiers have been seen in the propaganda videos of the terrorists.

In fact, many minors going by the presentation are taken out of school and recruited by militia groups as combatants. Drug consumption and magical and occultist rituals (Odeshi) are used to control these children’s minds. They are then forced to commit atrocities, including against their family members.

On incitement to violence through the social media, he remarked that the social media have played a particularly noxious role in the degradation of the humanitarian situation in the Northwest and Southwest Regions. The climate of terror created by these social media is, indeed, the source of the fear observed among the populations and the forced displacements of these populations internally and out of the country.

“Through the social media, the terrorists and their sponsors carried out a sustained campaign to spread fear, hatred and violence. The hate speech calls for the killing of members of the defence and security forces, as well as the assassination of administrative authorities and other State representatives. The terrorists even called for attacks on ethnic or linguistic bases. The hate campaign on the Internet is also fuelled by fake news through which the terrorists accuse the defence and security forces of imaginary atrocities and even of perpetrating a genocide in the Northwest and Southwest Regions,” he said.

To him, such false accusations are often echoed by irresponsible politicians seeking notoriety, increase the fear and dissuade the populations who fled their villages from returning.

**Those Fuelling Crisis**

Many of the people inciting the population to hatred and violence, according to the report, are based abroad: Mark Bara, alias Bareta (Belgium), Ayaba Cho Lucas (Norway), Tapang Ivo Tanku, Akwanga Ebenezer, Dereck Mbongo, Nsoh Nkem Foncha, Chris Anu and Yinkfu Nsangong (United Stated of America), Shey Kaavi Wo Melim (Austria), Akoson Pauline Diale and her husband Akoson Raymond and Brado Etchu Tabenyang (Nigeria), John Mbah Akuro and Larry Eyong (South Africa).

These terrorist networks even organise fundraising from their country of residence to purchase weapons and fund terrorist activities. The Cameroonian Government has approached the authorities of the said countries to put an end to the terrorist support activities carried out on their territory.

**Impacts On Dev’t**

On the disruption of economic activities, PM Yang said, addressing the concerns raised by the population during Government field missions, the Head of State ordered the release of special funds for the implementation of a number of development projects, especially infrastructure projects in the Northwest and Southwest Regions.

“On March 15, 2018, four employees of SOROUBAT constructing the Kumba-Ekondo Titi road were kidnapped. One of them, a Tunisian, was later killed by his abductors; on December 12, 2017, seven employees of the Geotechnical Research, Studies and Control Firm (BRECG), hired to conduct geotechnical studies for the construction of the bridge over River Ebinsiont, were kidnapped in Akwaya Subdivision and are believed to have been assassinated by the terrorists.”
The objective of the terrorists, according to the report, seems to be to destroy the economy of the Northwest and Southwest Regions.

“Ghost town” operations imposed through intimidation and threat are having disastrous consequences on economic activities and household incomes. Due to these “ghost town” operations, burnings and explosive attacks, many businesses and markets have closed down.

The activities of industries in the Southwest Region (PAMOL and CDC), which are victims of repeated attacks, are being paralysed and their survival threatened. Thousands of people, thus, run the risk of losing their jobs.
Agricultural activities are also affected by the criminal actions of terrorist militia groups. Many families are compelled to abandon their agro-pastoral activities.

Driven by greed, the terrorists also attack goods, transport and travelling activities, increasing hold-ups and looting.

**Administrators As Scapegoats**

*On attacks on administrative and traditional authorities the report equally noted that administrative authorities have been regular targets of the terrorists who, in their propaganda, have continued to call for the murder of these representatives of the State.*

*Examples going by the report include: February 11, 2018, kidnapping and assassination of the Divisional Officer of Batibo, Northwest Region; March 20, 2018, attack on the convoy of the Lebialem Senior Divisional Officer at Mockmbie.
The SDO was seriously wounded and the Divisional Delegate of State Property, Surveys and Land Tenure killed; April 22, 2018, attack on the convoy of the Governor of the Southwest Region in Lebialem Division; May 20, 2018, kidnapping of the 2nd Assistant Divisional Officer of Lebialem; March 17, 2018, kidnapping of Professor Ivo Leke Tambo, Chairman of the GCE Board Council in Alou Subdivision; at least 15 attacks have been carried out against traditional chiefs; February 5, 2018, assassination of the 3rd Class Chief of Esukutan in Toko Subdivision; February 19, 2018, burning down of the residence of the traditional chief of Etam (Kupe-Muanenguba); February 13 and 24, 2018, burning down of the residences of the Chiefs of Myerem in Akwaya Subdivision (Manyu) and Nguti (Kupe-Muanenguba).*

*On abuses against the population, the report underscored that, since the beginning of the crisis, the people of the Northwest and Southwest Regions have been victims of all sorts of violence and atrocities from the terrorists.*

*Instigated by the people behind the scene, most of who live abroad, hordes of armed youths under the influence of drugs, scour villages and rural areas where they kill, rape, loot and extort the populations. Just in the first half of 2018, more than a hundred properties were destroyed or torched by the terrorists.*

*Many women and girls, going by the report, were victims of sexual abuse (rape, false marriages, unwanted pregnancies, and so on). Such is the case of three teenage girls who were raped by terrorists on May 23, 2018, in the locality of Matazem, Mezam Division. Several persons suspected of collaborating with the authorities were murdered. This abuse against civilian populations was confirmed by Transparency International in its latest report in June 2018.*

***Innocent Civilians Pay Supreme Prize***

*During the past twelve months, the two Regions have recorded more than a hundred civilians killed by these bands of armed terrorists.*

*Recent cases, according to the report, include; in the Northwest Region: Bangha Antony and Chia Emmanuel, killed on March 23, 2018, in Belo by terrorists who accused them of collaborating with the defence and security forces; Awira Joseph Wirba, abducted and beheaded by his abductors on February 14, 2018 in Kitiwum, Bui Division; Salman Fasil Lemnyuy, murdered on March 27, 2018 in Kikaïkom, Boyo Division; Fosso Taka Armel Shelia, killed on March 7, 2018 in Batibo, Momo Division; Nganyou Robert, killed by terrorists on January 25, 2018 in Tadu, Bui Division; Boumzina Albert, killed on April 24, 2018, in Ngie, Momo Division; Gallega Emmanuel, killed by terrorists on March 26, 2018, in Widikum, Momo Division; Acha Clarisse, killed by terrorists on March 23, 2018, in Batibo, Momo Division.*

*Cases in the Southwest Region: Netomba Simon, killed on June 1, 2018, at Bamuso; on April 7, 2018, the irredentists abducted eight people in Ebonji Village, Tombel Subdivision. The brother of the Village Head, Eboka Samuel, who resisted, was murdered in cold blood; on April 4, 2018, businessman, Budze Tayoh, alias DJ Plaza, was murdered by the irredentists in the locality of Nteho, Bangem Subdivision (Kupe-Manenguba).*

*They accused him of providing supplies of beverages to the defence and security forces; on March 17, 2018, a bus transporting 30 passengers, including many students on their way to Menji, was attacked by terrorists, its occupants illegally confined and despoiled of their property; on April 6, 2018, the terrorists forced villagers to contribute to the “war effort” in Balangi, Mbonge Subdivision (Meme); on April 13, 2018, the terrorists attacked the villages of Ediki and Balangi, on Highway No. 8 (Muyuka-Kumba) in Mbonge Subdivision (Meme). Fleeing these acts of violence, 210 people crossed River Moungo through the Kumba-Mbanga railway bridge and arrived in Mbanga (Moungo) the same day.*

*The acts of violence and atrocities perpetrated by the terrorists undoubtedly forced some members of the population of the Northwest and Southwest Regions to seek refuge in other regions of Cameroon and in neighbouring Nigeria.*

*In the face of the insecurity created by the terrorists and its humanitarian consequences, the Government, aware of its responsibility to protect citizens and their property, embarked on two types of actions.*

***Gov’t Efforts To Restore Peace***

*Firstly, it focused its efforts on restoring security to protect the populations and create conditions to enable displaced persons and refugees to return to their usual places of residence. These efforts are beginning to bear fruit with the recent annihilation of several bands of terrorists.*

*They will continue, resolutely, until return to normalcy in these areas. Civilian and military actions will also be taken with more intensity by the defence and security forces, in order to reassure the population and dissipate the intense fear created by the terrorists’ noxious propaganda.*

*Secondly, worried about the condition of the population in distress owing to the situation created by the terrorist bands, the Government sent out teams in the crisis Regions and beyond, to assess the humanitarian situation and bring urgent and appropriate humanitarian assistance to these people.*

*On the current situation, the report envisaged humanitarian assistance concerning internally displaced persons (IDPs) estimated at 74,966, including 66,412 in the Southwest Region and 8,554 in the Northwest Region.
In addition, there are victims of abuses in the host localities and communities.*

*The needs identified are food security, health, education, housing, security and psycho-social assistance.
Regarding the action already taken, the report stated that the fight against Boko Haram showed the wonderful solidarity of Cameroonians with their compatriots in distress.*

*This has also been confirmed during the crisis in the Northwest and Southwest Regions. As part of this spirit of solidarity, tolerance and hospitality typical of Cameroonians, many displaced persons were received by their family members living in major urban centres such as Bamenda, Buea, Limbe, Yaounde, Douala and Bafoussam.*

*Other displaced persons have also benefited from assistance by administrative authorities to care for them at the local level. Such measures include: reception and resettlement of displaced persons; and distribution of beddings, toiletry, food and essential items.*

*Such has been the case for displaced persons in Ediki and Bombe-Bakundu Villages in Meme Division, who were received in Mbanga in the Moungo Division, under the supervision of local administrative authorities.*

*Similarly, persons from Lebialem Division in the Southwest Region have been resettled in Fongo-Tongo Subdivision in Menoua Division, under the same conditions.*

*Measures for the enrolment of students from crisis-prone areas into schools in the Littoral, West and Centre Regions continued during the 2017/2018 academic year.*

*The defence forces carried out civilian and military actions for crisis victims in Akwaya Subdivision, through the construction of water points, healthcare delivery, rehabilitation of classrooms, distribution of health kits, provision of educational materials and food items.*

*The various actions taken to that effect were particularly appreciable and of great use to the beneficiary populations. The magnitude of the needs, however, requires more efforts by the Government, with the contribution of all persons of good will.*

*On thrust treas, Government’s actions will focus on the following areas: access to accommodation, supply of food items and essential goods, education, housing, protection and reconstitution of personal documents.
These actions will be supplemented by visits to provide assistance and comfort to persons who have sought refuge in Nigeria.*

*Regarding health, Government’s actions will consist in rehabilitating health centres that have been damaged, abandoned or closed down. Awareness campaigns on hygiene and sanitation measures will also be conducted to reduce risks of waterborne diseases or epidemics.*

*Regarding agro-pastoral activities, the emergency plan will support the supply of agricultural inputs and livestock in order to revamp the activities of affected rural people.*

*Concerning education, schools will be rehabilitated and measures taken to protect teachers and students in view of a smooth start of the 2018-2019 academic year.*

*In the area of housing, emergency accommodation will be provided to IDPs and damaged houses rebuilt.
To ensure the protection of vulnerable groups, awareness campaigns against gender-based violence, early marriages and early pregnancy, child labour, drogue use, enrolment of youths in armed groups, will be carried out.
The humanitarian emergency plan also provides for the delivery of psycho-social assistance to victims and the reconstitution of lost or damaged civil status or identification documents.*

*Regarding the implementation of the action plan, the PM said an ad-hoc Committee under the authority of the Minister of Territorial Administration, assisted by the Minister of External relations, will be responsible for coordinating the humanitarian response to the situation in the Northwest and Southwest Regions.*

<https://cameroonpostline.com/govt-announces-12-7-billion-humanitarian-plan-for-nw-sw-regions/%E2%80%8B>

1. [**Gendarmes Murder Suspects After Torturing, Sharing Video Online**](https://cameroonpostline.com/gendarmes-murder-suspects-after-torturing-sharing-video-online/%E2%80%8B)

 FEB 6, 2018

**By Andrew Nsoseka**

Suspect, Samson, before his murder

A video making rounds on the social media, showing Gendarme officers torturing suspected aiders or orchestrators of attacks on officers has reportedly ended with the brutal assassination of the suspects.

The video, whose setting could not be deduced, except for the mention of Fundong by one of the suspects under torture, is trending on the social media. Gendarme officers in the video, whose faces were not shown, except for half of their uniformed bodies, could be seen questioning and torturing two handcuffed men.

The victims, one of whom was referred to as Samson, dressed in a red T-Shirt and red shorts, wearing dreadlocks, was on the floor with broken and bleeding limbs, beside numerous little brown wrapped papers containing some substance which he (Samson) confessed was tobacco that he sells, but are suspected to have aided or had knowledge about attacks on gendarme officers.

In the video, the said Samson was tortured and interrogated on the role he plays in the attacks of gendarme officers and the whereabouts of their guns. The said gun was seemingly not found in the place where he was captured.Several times; he refused any knowledge of the attacks of gendarmes. He also refused ever having or using a gun. He said all he knows and does is selling ‘tobacco’ which were carted from his house and brought out to where he was tortured.

His grilling was accompanied by cries in agony as he was being flogged and maimed. Throughout the video, the said Samson denied accusations levelled against him, as he spoke with a mouthful of blood oozing out as a result of the torture being administered on him.

Samson’s co-suspect answering questions prior to his killing

In the video another suspect dressed in a red dress and Jean trousers, whose name wasn’t mentioned throughout the video, was shown, answering questions and giving details on the said attacks on gendarmes. He confessed that he knew about the attack and did not participate in it. He went further to say that Samson, the other suspect also had knowledge about the attack and that those who attacked the Gendarmes were four in number.

In his own version, Samson’s co-suspect said Samson had earlier boasted that if shot, the bullets wouldn’t penetrate him, because he had a traditionally made talisman that makes him bullet proof. As he narrated his own version with guns pointed over his head, blood in the mouth and streams of clotted blood that ran from his nostrils to his body, he made confessions that tend to incriminate his co-suspect.

Also in the video, several gendarmerie officers could be seen, making frantic efforts to videotape the whole process and also threatening to shoot the suspects, if they didn’t tell them what they wanted to hear. The video is preceded by a photograph of the dead suspects, lying in their pool of blood.

The gory pictures of the dead twosome has surfaced amongst the pictures circulating on the social media, asking people to identify and take the corpses for burial as they had been abandoned at the Bamenda Regional hospital. It is alleged that the corpses, said to be five in number, cannot be kept in the morgue because of their very bad state.

Reports also say the corpses were brought tothe hospital byseven Gendarmes from Belo, a village that came under heavy military assault recently.

<https://cameroonpostline.com/gendarmes-murder-suspects-after-torturing-sharing-video-online/%E2%80%8B>

1. [**How Soldiers Looted In Ambo-Batibo: Victims’ Tragic Tales**](https://cameroonpostline.com/how-soldiers-looted-in-ambo-batibo-victims-tragic-tales/%E2%80%8B)

 FEB 6, 2018

[
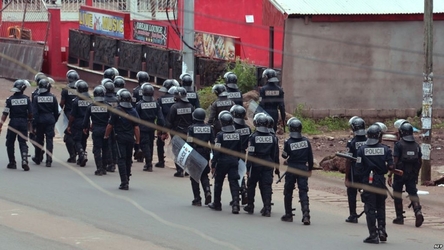
](https://cameroonpostline.com/how-soldiers-looted-in-ambo-batibo-victims-tragic-tales/%E2%80%8B)

**By Chris Mbunwe**

*Wednesday, January 31, is the day and month that a Batibo man in Momo Division of the Northwest will hardly forget. On this day, soldiers who were chasing a bike and gunman who, as early as 8am, went round town shooting in the air and chanting “Ambazonia Oye! Ambazonia Oye, our new country Oye!” and his mystical disappearance when he reached Ambo village, left the soldiers confused and they started venting their anger on the unarmed population. For fear of being arrested, young men and women disappeared into bushes. The whole of Batibo Commercial street was deserted.*

*In order to steal freely, the soldiers went on the rampage, firing guns in the air and the villagers disappeared into the bushes nearby and watched helplessly as their shops, private homes were being broken into, ransacked inside-out and goods carted away in their military vehicles.*

*Over FCFA 4 million, was stolen from stores and goods estimated at FCFA 7 million, carried away by soldiers.*

*When this reporter met the soldiers at the brigade, some of them were still feeding on their booty; bread, smoked meat, fresh meat from restaurants, biscuits, sardines, assorted can foods.
Anyone who resisted or tried to prevent the soldiers’ access to stores around was severely beaten.*

***Victims Recount Tragic Tales***

One of the victims, Mary Ngati, 70, a Widow who is barely eking out life through the sale of food, recounted that the soldiers stormed her home and carted away food and money.

“My husband died a year ago and we have been managing this business for a living. Unfortunately for us, this morning, soldiers from nowhere came chasing us out of our homes, shops, and where they could not gain access they smashed the door open and took every franc collected. We sold food for FCFA 24,000, and they carried it away with smoked meat, foot trotters etc.”

The CWF Treasurer of Presbyterian Church Ambo, Bridget Mbah, bemoaned the grabbing of church money by soldiers: “The money I brought from Church yesterday and today, about FCFA 125,000, have all been carried away by the soldiers who forced opened my bedroom and went straight for the mattress.”

Another victim, Grace Aboh, 67, said: “the soldiers shattered all the louvers of our new house. We were still planning to move into the newly constructed house. I cannot estimate the cost of destruction and the amount cannot be below FCFA 500,000”

According to Alfred Tah, whose finger was shattered by a gunshot, the solders got him well beaten because their gunshot aimed at him, didn’t get the target. Hear him: “a bullet aimed at me failed to get me on the right spot, but it shattered my finger.

When they forced the door open and got into my bedroom, the soldier shot at me but I immediately fell on the floor and prostrated. He got me up and started beating me with a plank, calling me an ‘Odeishi’. My FCFA 700,000, android phones, whiskies and many things I had in my shop were carted away”.

Not even the physically challenged were spared from the military brutality as Milani Anoh, a physically impaired was also assaulted: “I am a disabled and I have only this hair dressing saloon that the military have destroyed for my livelihood. Right now I am so depressed.”

Eleve Atout, who is yet another victim who was tortured and fleeced of FCFA 300.000, had this to say: “My finger was shot and I was helpless as the soldiers molested me and collected FCFA 300,000 from my store.”

To Divine Mbah, a businessman in Batibo, “It has been a very sad day. All the laptops and other electronics that were in my shop, as well as FCFA 250,000, have been carried away by the uniform men.”

The story is not different from that of Ebenezer Nyambod Fon, who was arrested, thoroughly thrashed by the soldiers, his wallet containing FCFA 51500, was seized and he was later released to meet his mates in the bushes.

Other victims, Magaret Tendong and her sister, Bridget Anye said the door into their house was smashed and the soldiers ransacked the bed rooms and carted away an unspecified amount of money and jewels. Meanwhile, Grace Nduuh, a bar attendant said the soldiers broke into her off- license and drank some beer and soft drinks to their satisfaction.

“The worst thing they did was to break the bottles of beer since they could not carry them away.”
However, life has returned to normal in Ambo – Batibo, after the havoc caused by the soldiers.

<https://cameroonpostline.com/how-soldiers-looted-in-ambo-batibo-victims-tragic-tales/%E2%80%8B>

1. [**Populations Flood Kumba, NW As Military Hunts ‘Odeshi’ Boys**](https://cameroonpostline.com/populations-flood-kumba-nw-as-military-hunts-odeshi-boys/%E2%80%8B)

 JAN 23, 2018

**By Maxcel Fokwen**

Hundreds of families rendered homeless owing to a military crackdown on suspected Ambazonia forces accused of triggering unrest in villages across Mbonge Subdivision, continue streaming into Kumba and the Northwest Region.

Villagers who scampered into bushes last weekend have been making their way into Kumba to live with friends and relatives.

Others of Northwest extraction have made fast journeys back home. Their houses and other properties were set ablaze in the face of the escalating security situation in the Subdivision.

Kwa-kwa Bakundu, a village once full of life and a cosmopolitan population, has been reduced to a desert. The general outlook of the locality paints the image of a war zone.Almost all houses in the village have been burnt to ashes. Traces of human activities have been reduced to a non-existent level.
Houses, including churches, the house of a Parish Priest,and other important aspects of human habitation, have been reduced to cinders.

The Post could not confirm if it was the military that set the houses ablaze or some other gunmen. Eyewitness accounts hold that, when the military first touched down on Kwa –Kwa, they raided a neighbourhood known to host scores of youths who consume Indian hemp and other drugs.

**Casualties Not Known**

*Amid reports of deaths recorded on all sides, it is unclear how many people might have died in the face of the deteriorating situation. Attempts to confirm allegations of corpses found abandoned in Kwa-kwa Village were fruitless.*

***Victims Narrate Ordeal***

One of the victims, a Traditional Council Head, who spoke to The Post on condition that his name will not be published, said hundreds of women, children and men have suddenly become victims of war.

“Iran into the bush and only struggled to get into Kumba today. These boys think they have power to fight the Government, but now, we the poor people, are the ones suffering.

I don’t know the whereabouts ofmy daughter who just gave birth. I have not heard from my mother ormy brothers. But I know one of my junior brothers ran to Lobe Estate. I hope the Government will take measures to end this crisis,” the Traditional Council Head said.

The same source said, before now, countless attempts to encourage people to send children back to school have earned him death threats.

A native of Kwa-Kwa Bakundu who just returned from China said his house under construction was reduced to rubble. He could not, however, confirm if it was the military or gunmen that set the house on fire.

The Post equally encountered a couple of Northwest extraction stranded around Catholic Church Kumba Town. The couple said they were into cocoa business. According to the couple, all they have left are the dresses they had on. They confirmed the burning of their house and property in Kwa-Kwa Bakundu.

**Cross To Francophone Zones In View**

*A traditional ruler, already seeking refuge in Kumba, told The Post he is considering relocating his family to Mbanga in the Littoral Region. The Chief, who refused to be named, said, if the situation persists, he was going borrow money to relocate his family to Mbanga.*

*Another traditional ruler hinted that, from the developments on the field, he could be forced to seek spiritual help from witch doctors in Kupe Muanenguba Division.
‘Odeshi Boys’ Suspends Kumba–Ekondo-Titi Road*

*Besides threats to life, the suspected Odeshi boys are reported to have threatened officials of the SOROUBAT Company to stop work on the Kumba-Ekondo-Titi Road.*

*It is reported that, in a bid to force home their threat, the gunmen shot one of the workers of the company on the head.*

*Reports are emerging of some people among the population donating money to the boys whenever they show up in any village.*

*Besides Kwa-Kwa Bakundu, other villages wrapped in the menace include:Ekombe, Bai Panya and a host of others.The villages slipped into chaos since January 12. On this day, the Chief of Ngongo Village was lured off the wake-keeping ceremony of Chief Manfred Tukwa. Chief Ekebe was later found death.*

*After the incident, unidentified gunmen surfaced in the village issuing threats on certain individuals. This led to a military response from security forces. In the wake of the cross fire, the population fled into safety.*

*Yet,since January 15 to January 21, sustained military parades have been the order of the day across Mbonge Subdivision. The supposed Ambazonia forces have resorted to sporadic attacks.*

<https://cameroonpostline.com/populations-flood-kumba-nw-as-military-hunts-odeshi-boys/%E2%80%8B>

1. [**Village Chief Shot Dead, Colleagues On-the-run**](https://cameroonpostline.com/village-chief-shot-dead-colleagues-on-the-run/%E2%80%8B)

 JAN 15, 2018

**By Maxcel Fokwen**

The death has been reported of Chief Johannes Ekebe Niongo of Ngongo Village in Mbonge Subdivision, Southwest Region, after suspected gunmen lured him off a funeral ground in the night of January 12.
Chief Ekebe was coordinating the wake-keeping ceremony of his colleague, late Manfred Tukwa of Kwa Kwa Bakundu, who passed on a month ago.

His colleagues narrated to The Post that a subject from his village came to the funeral ceremony and alerted Ekebe that some people wanted to see him for an urgent matter in the village.
Chief Ekebe is said to have left his car at the funeral and boarded a bike with the subject. His colleagues explained that Ekebe and the subject rode off on the bike supposedly to his palace in Ngongo.

Hours later, a passerby stumbled on the Chief in the pool of his own blood on the road and people and the Chief was rushed to the Kumba District hospital. Chief Ekebe is said to have died about five hours after.

Unconfirmed reports indicate that, before giving up the ghost, the traditional ruler said the gunmen shot him thrice on the stomach before fleeing. Other sources claimed that, the Chief mentioned the name of one of his killers before breathing his last.

**Military Officer Wounded**
In the evening hours of Saturday, January 13, news broke of an attack on a military officer at the funeral ceremony of the late Chief Tukwa at Kwa Kwa Bakundu.
The Post gleaned that unidentified youths of the village attacked and wounded the officer who came to condole with the family of the late Chief.

It is said the attack was retaliation to military action on the village after the Kombone Town gun attack that left a police officer dead. As at the time of this report, the officer was said to be battling between life and death.
DO Roped Into Assassination
Before the chief gave up the ghost at the hospital, social media postings had gone viral accusing the Divisional Officer, DO, of Mbonge Serge Alain Befolo, of shooting the Chief.
Contrary to the reports, close aides of the administrator told The Post that he was out of Mbonge Subdivision on the day of the incident. Others say detractors of the administrator want to stain his name.
Meantime, reports talk of sporadic gunshots all over Kwa Kwa Village in the night of Saturday, January 13 breaking Sunday, January 14.

**Funeral Deserted, Chiefs On The Run**
The killing of the Ngongo traditional ruler provoked a scare among Meme Chiefs. The consequence was a massive boycott of the burial of their colleague. The Kwa Kwa funeral ground was void of royal presence. Even a special goat meat pepper soup prepared for the Chiefs was abandoned.
At the moment, scores of Meme Chiefs have fled from their villages. Rumours have emerged that a number of others are still being targeted. An anonymous message is said to have been sent to the mobile phones of the Chiefs of an impending attack on them.

It is presumed that the propagators of the situation are accusing the Chiefs of collaborating with the Government in the face of the socio-political fractures ongoing in the English-speaking Regions.

<https://cameroonpostline.com/village-chief-shot-dead-colleagues-on-the-run/%E2%80%8B>

1. [**October 7 Presidential: Candidates, Lawyers Say Election Didn’t ‘Hold’ In NW, SW**](https://cameroonpostline.com/october-7-presidential-candidates-lawyers-say-election-didnt-hold-in-nw-sw/%E2%80%8B)

 OCT 25, 2018

By Sylvester Atemnkeng

One of the opposition candidates at the October 7 election, Joshua Osih of the Social Democratic Front, SDF, has described the election as ‘apartheid’, arguing that the Anglophone people in the Northwest and Southwest Regions did not vote.

Osih, who was presenting the SDF petition before the Constitutional Council, urged the court to restore order and save the country from ‘imminent collapse’.

“No election took place in the Northwest and Southwest Regions… the people could not vote because they are Anglophones, and that is apartheid,” he said.

The election in the English-speaking Northwest and Southwest Regions, was marred by low turnout and isolated incidents of unrest, as separatists sought to prevent participation in the vote.

Constitutional Council Rejects All Post Electoral Litigations

Cameroon’s Constitutional Court rejected overnight a post-electoral appeal from Joshua Osih of the Social Democratic Front, the main opposition party, thus rebutting all 18 judicial protests made since the Presidential vote.
The court rejected Osih’s request as not justified, shortly after the closure of hearings that started on October 16 in the wake of the election on October.

None of the appeals were successful, whether on grounds of insecurity or alleged mass fraud at the polls.
Osih asked the court for the cancellation of the whole election, in which 85-year-old President Paul Biya was seeking a 7th term, after almost 36 years and against a backdrop of mounting resistance in the two English-speaking Regions of the country.

The SDF candidate argued that the election “didn’t take place” in these territories, which are historic bastions of his party in a largely Francophone nation, because of the security situation.

The past year has seen the eruption of open warfare in the Northwest and Southwest Regions between armed separatists and Government troops. At least 420 civilians, 175 members of the security forces and an unknown number of separatists have been killed, according to the International Crisis Group, ICG.

The President of the Constitutional Council, Justice Clement Atangana, told the court that “the election was held in the two Regions of the Northwest and the Southwest, where, respectively, 32,729 and 57,084 voters were recorded,” out of more than one million registered voters.

Lawyers for the SDF presented examples to argue that potential voters had been deprived of their rights, either by being already displaced by violence or because they were unable to venture out of their homes.

“The National President of my party, Ni John Fru Ndi, had his house wrecked (in the village of Baba II) and his younger sister was kidnapped because he voted, in defiance of instructions. People are dead because they cast their votes on October 7”, Osih stated.

Barristers Sama, Mbah Ndam & Other SDF Lawyers Spit Fire At The Constitutional Council Without Mincing Words
Former Bar Council President, Barrister Francis Sama Asanga, advised the Constitutional Council to cancel the October 7 Presidential election results, which, to him, have given Ambazonia fighters more reasons to fight.

The Bamenda-based Lawyer said, sustaining the results, especially in Anglophone Regions where voting did not take place, further divides the country and gives the impression that Amba Boys have won, and they are fighting for a just course.
“Mr. President, don’t give them reason to fight for secession,” he said.

Barrister Sama, who made a trilingual presentation (French, English and Pidgin), also said that most of the members of the Council live in Yaoundé and have never confronted Amba Boys, nor dwelled in an atmosphere of blood and violence like what he is going through, daily, in the Northwest Region.

He narrated an encounter he had with the Amba Boys while driving and testified that, even though it was terrifying, the boys escorted him when he revealed his identity.

He challenged the Council to ask some of its members who hail from Anglophone Regions whether they can step foot in their villages and vote.

He said houses of some regime barons have even been burnt down and, while they were at the Council on Wednesday, there was an attack on the SDF Chairman’s house in Baba II.

Sama then asked the Council whether, in such a situation, they expect the people of these two Regions to freely and fairly exercise their rights to vote. He said, despite his popularity, when he attempted to open his gate, he was asked to get inside and close it firmly.

His arguments were sustained by other Lawyers for the SDF, Ngwana Mustapha, who argued that most administrators in the Northwest and Southwest have all fled the areas, except in some major towns. He wondered aloud how elections would take place hitch-free in such an atmosphere.

<https://cameroonpostline.com/october-7-presidential-candidates-lawyers-say-election-didnt-hold-in-nw-sw/%E2%80%8B>

1. [**Anti-Riot Troops Deployed As Biya Is Proclaimed Winner**](https://cameroonpostline.com/anti-riot-troops-deployed-as-biya-is-proclaimed-winner/%E2%80%8B)

 OCT 25, 2018

By Nformi Sonde Kinsai

As incumbent and candidate for the CPDM party, Biya Paul, was, October 22, being proclaimed winner by the Constitutional Council, security in the city of Yaounde was on red alert.

The last October 7, 2018 Presidential election in Cameroon saw the participation of eight other candidates, notably: Prof. Maurice Kamto, Libii Li Ngue Ngue Cabral, Joshua Osih Nambangi, Serge Espoir Matomba, Franklin Ndifor Afanwi, Ndam Njoya Adamou, Muna Akere Tabeng and Garga Haman Adji.

Ever since one of the candidates at the election, Prof. Maurice Kamto of the Cameroon Renaissance Movement, CRM, declared on October 8 at a press conference in Yaounde that: “Cameroonians gave him the mandate and that he kicked and scored the penalty,” the Yaounde CPDM political elite and allies interpreted such a move to mean that he declared himself winner of the Presidential election.

By that token, and according to the Secretary General of the CPDM Central Committee, Jean Nkueté, who granted a press briefing that same October 8, the act by Prof. Kamto was tantamount to calling on Cameroonians to go down to the streets to protest and claim an imaginary victory. The CPDM party elite and members of the G20 multiplied attacks on the CRM candidate, accusing him of prompting an insurrection.

They insisted that Presidential election results in Cameroon are proclaimed by the Constitutional Council following Section 137 of the Electoral Code. But during hearings of the post-election litigations at the Constitutional Council, Prof. Kamto told the court that his declaration of October 8 was not in defiance of the rights and prerogatives of the Constitutional Council, but was based simply on Section 113 of the Electoral Code which states that “once counting is over, the results obtained in each polling station shall be proclaimed.”

As the debate was raging on, coupled with hearings of post-election litigations at the Constitutional Council with the parties presenting arguments for or against the partial or total cancellation of the Presidential election, a mixed squadron of anti-riot police and gendarmes were deployed to all the major junctions of the capital city of Yaounde. As the days were closing up to the October 22 proclamation of the election results, the security disposition was beefed up.

Besides the combat-ready security operatives stationed at the major junctions of the town, anti-riot police and gendarmerie equipment, including water cannons, popularly called “Abraham” were displayed probably to wade off “trouble makers.” Neighbourhoods dominantly inhabited by the Anglophones and the Bamilekes, from all observations, had stronger security deployment.

Another scaring move observed on Saturday, Sunday and Monday morning by this reporter, as well as many other denizens of Yaounde, was the patrol in the city of military men and women armed to the teeth. The impression that was being given was that the city of Yaounde was under threat of an attack by a very “dangerous enemy.”

Some bike riders who ply from the Centre Handicapé and Entrée Simbock junctions into the neighbourhoods told The Post that they were being chased away by the security forces. They explained that they were being prohibited from grouping in large numbers. They said they were hinted that if the instructions are not followed, the security agents will break such groupings by force, irrespective of whether they were planning street demonstrations or not.

A friendly security officer, who was manning one of the patrol teams and who preferred to remain anonymous, told The Post that in matters of ensuring public security and order, nothing is taken for granted. He said the security measures put in place were to pre-empt any eventuality, considering the tense post-election atmosphere Cameroon is witnessing.

“We are out to protect the republican institutions. Let parents advise their children not to get themselves involved in any street demonstrations,” he simply told The Post and refused to comment further.

The Post, however, gathered that the security measures put in place will remain as stiff till mid November when the newly (re)elected President, Paul Biya, would have taken the oath of office.

According to Section 140 (1) of the Electoral Code, “the President-elect shall assume office once he or she takes the oath within no less than 15 (fifteen) days of the proclamation of the results by the Constitutional Council.
Sub 2 of that Section states that: “He shall take oath of office before the Cameroonian people in the presence of Members of Parliament, the Constitutional Council and the Supreme Court, meeting in solemn session in the manner and words prescribed herein under:

“The President of the National Assembly shall administer the oath following a short address which he shall conclude in the following established form:

“Mr. President of the Republic, do you pledge yourself on your honour to faithfully perform the duties entrusted to you by the people, and do you solemnly swear before God and all men to devote all your efforts to preserving, protecting and defending the Constitution and the laws of the Republic of Cameroon, to watch over the commonwealth of the Nation, and to uphold and defend the unity, integrity and independence of the Cameroon Fatherland?

“The President-elect, standing, raising his right hand and facing the Members of Parliament, the Constitutional Council and the Supreme Court, shall pledge himself by answering:

“I so do swear.”

<https://cameroonpostline.com/anti-riot-troops-deployed-as-biya-is-proclaimed-winner/%E2%80%8B>

1. [**October 7 Presidential: Candidates, Lawyers Say Election Didn’t ‘Hold’ In NW, SW**](https://cameroonpostline.com/october-7-presidential-candidates-lawyers-say-election-didnt-hold-in-nw-sw/%E2%80%8B)

 OCT 25, 2018

By Sylvester Atemnkeng

One of the opposition candidates at the October 7 election, Joshua Osih of the Social Democratic Front, SDF, has described the election as ‘apartheid’, arguing that the Anglophone people in the Northwest and Southwest Regions did not vote.

Osih, who was presenting the SDF petition before the Constitutional Council, urged the court to restore order and save the country from ‘imminent collapse’.

“No election took place in the Northwest and Southwest Regions… the people could not vote because they are Anglophones, and that is apartheid,” he said.

The election in the English-speaking Northwest and Southwest Regions, was marred by low turnout and isolated incidents of unrest, as separatists sought to prevent participation in the vote.

Constitutional Council Rejects All Post Electoral Litigations

Cameroon’s Constitutional Court rejected overnight a post-electoral appeal from Joshua Osih of the Social Democratic Front, the main opposition party, thus rebutting all 18 judicial protests made since the Presidential vote.
The court rejected Osih’s request as not justified, shortly after the closure of hearings that started on October 16 in the wake of the election on October.

None of the appeals were successful, whether on grounds of insecurity or alleged mass fraud at the polls.
Osih asked the court for the cancellation of the whole election, in which 85-year-old President Paul Biya was seeking a 7th term, after almost 36 years and against a backdrop of mounting resistance in the two English-speaking Regions of the country.

The SDF candidate argued that the election “didn’t take place” in these territories, which are historic bastions of his party in a largely Francophone nation, because of the security situation.

The past year has seen the eruption of open warfare in the Northwest and Southwest Regions between armed separatists and Government troops. At least 420 civilians, 175 members of the security forces and an unknown number of separatists have been killed, according to the International Crisis Group, ICG.

The President of the Constitutional Council, Justice Clement Atangana, told the court that “the election was held in the two Regions of the Northwest and the Southwest, where, respectively, 32,729 and 57,084 voters were recorded,” out of more than one million registered voters.

Lawyers for the SDF presented examples to argue that potential voters had been deprived of their rights, either by being already displaced by violence or because they were unable to venture out of their homes.

“The National President of my party, Ni John Fru Ndi, had his house wrecked (in the village of Baba II) and his younger sister was kidnapped because he voted, in defiance of instructions. People are dead because they cast their votes on October 7”, Osih stated.

Barristers Sama, Mbah Ndam & Other SDF Lawyers Spit Fire At The Constitutional Council Without Mincing Words
Former Bar Council President, Barrister Francis Sama Asanga, advised the Constitutional Council to cancel the October 7 Presidential election results, which, to him, have given Ambazonia fighters more reasons to fight.

The Bamenda-based Lawyer said, sustaining the results, especially in Anglophone Regions where voting did not take place, further divides the country and gives the impression that Amba Boys have won, and they are fighting for a just course.
“Mr. President, don’t give them reason to fight for secession,” he said.

Barrister Sama, who made a trilingual presentation (French, English and Pidgin), also said that most of the members of the Council live in Yaoundé and have never confronted Amba Boys, nor dwelled in an atmosphere of blood and violence like what he is going through, daily, in the Northwest Region.

He narrated an encounter he had with the Amba Boys while driving and testified that, even though it was terrifying, the boys escorted him when he revealed his identity.

He challenged the Council to ask some of its members who hail from Anglophone Regions whether they can step foot in their villages and vote.

He said houses of some regime barons have even been burnt down and, while they were at the Council on Wednesday, there was an attack on the SDF Chairman’s house in Baba II.

Sama then asked the Council whether, in such a situation, they expect the people of these two Regions to freely and fairly exercise their rights to vote. He said, despite his popularity, when he attempted to open his gate, he was asked to get inside and close it firmly.

His arguments were sustained by other Lawyers for the SDF, Ngwana Mustapha, who argued that most administrators in the Northwest and Southwest have all fled the areas, except in some major towns. He wondered aloud how elections would take place hitch-free in such an atmosphere.

<https://cameroonpostline.com/october-7-presidential-candidates-lawyers-say-election-didnt-hold-in-nw-sw/%E2%80%8B>

1. [**For Respecting Ghost Town: Buea Council Seals MTN, Orange, NEXTTEL Premises**](https://cameroonpostline.com/for-respecting-ghost-town-buea-council-seals-mtn-orange-nexttel-premises/%E2%80%8B)

 NOV 17, 2017

**By Joshua Boanong, *Beatrice Tipa, *Patience Taku & *Geraldine Lyonga**

The Buea Council has placed a seal on the offices of MTN Cameroon, NEXTTEL and Orange Cameroon branch offices in Buea, Southwest Region, for heeding to ghost town calls, which have persisted in the Municipality for close to a year now.

The seal on the Buea branches of the Telecom networks was put on November 13 by the Council’s officials who moved from shop to shop sealing every one that was not open.
Many of the company’s customers who visited the offices to have their mobile telecommunication issues solved were left stranded outside.

A shop owner, whose name we withhold for fear of reprisal, recounted how she got the news sealing her shop.

“I have not been in town for over a week now. I was out for a burial in the village and I was only called by my neighbour on Monday who informed me about it. I could not come to the shop sinceI was not in town. But I have decided not to respect the seal because I don’t have any agreement with the council.

I have a pile of documents showing my regular patent payment. I have said it time and again that, if they want me to open my shop [during ghost town], I will provide a document for them to sign. This will spell out that in case of any arson, they will take responsibility. I can equally decide to lock up my shop for a month that is not their business,” she ranted.

Another manager of a company in Buea, who refused to make known his identity for fear of the unknown, found it hard to come to terms with the reason why their company should be sealed without a notification letter.

“We are seriously affected by the seal; this is a company that deals directly with the customers. If we are locked, it means the customers we serve will be frustrated,” he said.

A shopkeeper explained that he was told that the Council has sealed some shops, but he came back to realise that his shop was not affected.

“All I can say is, I don’t have any business with them. The only people I can listen to are the taxation officials to whom I pay my tax. No one else!” he boasted.

The Post was informed by one of the shopkeepers whose shop was sealed, that they are expected to write an application to the Council requesting the officials to open their shops and later on sign an undertaking that they will not heed to any call to respect ghost town.

Hitherto, when the drums for ghost town were higher, the Council, through the Mayor, Patrick Ekema Esunge, bought over 20 township taxis to frustrate the taxi drivers who respected ghost town.

In another effort, the Council issued a notice, in May, demanding of fruit sellers at the Mile 17 Bus stop to cease respect to respect ghost town. To the Mayor, it is a breach of contract, and in the communiqué,the Mayor considers the respect of ghost towns as an act tantamount to treason against the State.

***(UB Journalism Students on Internship)**

<https://cameroonpostline.com/for-respecting-ghost-town-buea-council-seals-mtn-orange-nexttel-premises/%E2%80%8B>

1. [**Tombel-Kumba Road Axis Remains Shutdown Despite Relative Calm**](https://cameroonpostline.com/tombel-kumba-road-axis-remains-shutdown-despite-relative-calm/%E2%80%8B)

 OCT 25, 2018

By Maxcel Fokwen

The once busy Kumba-Tombel Road axis is yet to regain its traffic verve months after it went dead owing to deadly separatists and military clashes that paralysed human movement.

Bikers and other business persons who used the road daily are yet to return to the said axis despite relative calm in the area. The road is a major electricity route into Kumba and a business corridor for food and cash crops.

Deadly clashes on the axis affected the supply of electricity into Kumba. Before the gun battles of the Anglophone Crisis, Kumba enjoyed the supply of current from two ends. Since the Tombel end went dead, Kumba has been powered with electricity from the Buea-Muea axis.

The consequence has been a mixture of intermittent blackout and low voltage lasting some times for a week.
Beyond this, bikers who earned a living plying the road axis daily quickly fused themselves among those who circulate on the streets of metropolitan Kumba.

These reclined as the road axis became more of a dead corridor for travellers usually caught in crossfire.
Famers with estates that produce huge quantity of food crops and cocoa have bore the brunt of losing their source of livelihood.

Food crops such as plantains have been abandoned to rot in the bushes, while cocoa farms besides the road are left unattended to.

Villages such as Teke, Etam and Ebonji spread across this road corridor have suffered the consequence of separatists’ presence which often times end in security raids on homes and neighbourhoods.

Families have lost loved ones, houses and property. Kidnappings and killings have occurred along this road corridor on an unacceptable scale. Traditional rulers in most of these villages have seen their powers eroded to extinction.
Though a rough road axis riddled with muddy spots and gullies, people were however defiant in the days before the current social pressures erupted.

The deadly twist of the Anglophone Crisis is what suppressed human activity across this road corridor. It is unlikely that the road corridor will open any time soon.

<https://cameroonpostline.com/tombel-kumba-road-axis-remains-shutdown-despite-relative-calm/%E2%80%8B>

1. [**Oct 7 Elections: Biya Proclaimed Winner Amidst Heavy Deployment Of Troops**](https://cameroonpostline.com/october-7-presidential-election-biya-proclaimed-winner-amidst-heavy-deployment-of-troops/%E2%80%8B)

 OCT 25, 2018

By Yerima Kini Nsom

The Constitutional Council on Monday October 22, declared the incumbent President Paul Biya of the ruling CPDM party, winner of the October 7 Presidential poll. The solemn ceremony at the Yaounde Conference Centre came under very heavy deployment of troops.

Besides the fact that the Conference Centre was cordoned off by heavily armed combined squad of the gendarmerie and police elements, soldiers of the Rapid Intervention Battalion, BIR, constantly combed the streets of the nation’s capital in combat gear. As the Constitutional Council presented the results, the troops were almost omnipresent, making sure that nobody raised a finger of protest against the results of the election.

The deployment of troops came on the heels of widespread claims that opposition militants, especially those of the Cameroon Renaissance Movement, CRM, would take to the streets to protest against the stolen victory of their candidate, Prof. Maurice Kamto.

The Council had paved the way for the incumbent’s victory when it rejected all the 18 electoral petitions that painted the ubiquitous nature to the fraud that characterised the election. The atmosphere that enveloped the proclamation of the results was tense and ominous as allegations that Cameroonians would pour out to the streets to protest Biya’s victory, was rife.

According to the results, the Constitutional Council presented, President Paul Biya emerged the overall winner with 71.28 percent score. From the statistics presented, President Biya won in nine of the ten regions, keeping his closest challenger, Prof. Maurice Kamto, at a very safe distance with just 14.23 percent score.

The performance of the other candidates in order of merit stood ad follows: Libii Li Ngue Ngue Cabral 6.28 percent; Osih Joshua Nambangi 3.35 percent; Ndam Njoya Adamou 1.73 percent; Garga Haman Adji 1.55 percent; Ndifor Afanwi Franklin 0.67 percent; Serge Espoir Matomba 0.56 percent and Muna Akere Tabeng 0.35 percent.

<https://cameroonpostline.com/october-7-presidential-election-biya-proclaimed-winner-amidst-heavy-deployment-of-troops/%E2%80%8B>

1. [**City Mayor Tells NW Administrators: Open Your Offices On Mondays Or Be Called Amba**](https://cameroonpostline.com/city-mayor-tells-nw-administrators-open-your-offices-on-mondays-or-be-called-amba/%E2%80%8B)

 DEC 6, 2020

By Chris Mbunwe
The Bamenda City Mayor, Paul Achobong, has castigated administrators and civil servants in the Northwest Regions who do not go to work on Mondays “but are the first to rush to the banks every month end to collect their salaries.”
He said “such attitudes clearly demonstrate that they are Amba supporters and should go and receive their salaries from Amba.”
Mayor Achobong regretted that all Government offices are always closed on Mondays and the population cannot get their documents treated on time.
“This is not fair and beginning January 2021 as we enter this New Year; we must take as a resolution that enough is enough to ghost towns on Mondays because the socio-economic damages for four years have been colossal. People are fade-up with this senseless war. Almost every home has been touched… We cannot keep on living this way. ”
This was the lone message from the Bamenda City Mayor as he crisscrossed Councils holding their budgetary sessions.
He said, starting from the Governor, the SDO and Dos, if their offices are not opened on Mondays to render services for which they are paid, they would be tagged as ambas.
Achobong urged the Councillors of the various councils to persuade those in the bushes and their leaders to come out so that all will use “this season of forgiveness, reconciliation and reconstruction to revive the economy of Bamenda.
“I don’t know the magic your Councils are using in paying your sitting allowances and salaries when the population is not paying taxes,” Achobong said.
Talking in prelude to the December 6 Regional Elections, the City Mayor called on Councillors and Fons to bury their hatchets and party lines and vote those that will take Northwest to another level.
Meanwhile, at every stopover, majority of those who spoke told the City Mayor that most of them don’t open their business premises on Mondays for fear and not that they support ghost towns.
“Our businesses have crumbled, our loved ones killed’; let those perpetrating these arson and killings, including reinforcing ghost towns change their strategy” they said.

<https://cameroonpostline.com/city-mayor-tells-nw-administrators-open-your-offices-on-mondays-or-be-called-amba/%E2%80%8B>

1. [**Why Did Fons Of Mankon, Bafut, Kom, Others Not Attend National Dialogue?**](https://cameroonpostline.com/why-did-fons-of-mankon-bafut-kom-others-not-attend-national-dialogue/%E2%80%8B)

 OCT 3, 2019

**By Joe Dinga Pefok**

Cameroonian authorities have been silent on the fact that a number of prominent Fons (traditional authorities) of the restive Northwest Region, where the authorities claim things are under control, did not travel to Yaounde either for the consultation meetings with the Prime Minister or for the national dialogue proper, that ran from September 30 to October 4, supposedly focused on the Anglophone Crisis.

Three of the five First Class Fons of the Northwest Region; Fon Angwafor of Mankon, Fon Abumbi of Bafut, and the Paramount Fon of Kom, neither took part in the consultation meetings nor in the dialogue proper. Significantly, Fon Angwafor of Mankon is as well the 1st Vice National President of the ruling CPDM, while Fon Abumbi of Bafut is a member of the Central Committee of the CPDM as well as the a former National President of  the Northwest Fons Union, NOWEFU.

Another major absence was that of Fon Francis Aneng of Bafmeng in Menchum Division, who is one of the only two member s of the Political Bureau of the CPDM from the Northwest Region. He was also the last National President of a united NOWEFU.

When the Anglophone Crisis started escalating three years ago, quite a number of Fons in the Northwest Region abandoned their villages and ran to Yaounde, and a few to Douala, on the pretext that their lives were seriously under threat by Separatist fighters commonly known as ‘Amba Boys’. However, the only 1stClass Fon in the Northwest Region who abandoned his village and ran to Yaounde was Fon Dr. Ganyonga of Bali Nyonga, who is, as well, a member of the Central Committee of the CPDM as well as a Senator appointed by President Biya .

The Fon of Nso,  Sehm Mbinglo II, a former National President of a united NOWEFU, who is one of the two  1stClass Fons of the Northwest Region, that is currently living out of the region, did not run away from the Nso land. He defied all the odds allegedly mounted by a cousin of his who was one of the first people to join ‘Amba Boys’ in Nso, to settle scores with the Fon. Two of the Fon’s sons were brutally killed following a false accusation that the Fon sacrificed a young and an unnamed virgin to use witchcraft against ‘Amba’. Seemingly, following the trauma and other effects of the incident on the Fon’s health, he was taken away from Nso, for medical attention.

**National Dialogue Attended Only ‘IDP-Fons’**

When President Biya announced, on September 10, the holding of the national dialogue, the Prime Minister, Chief Dr. Joseph Dion Ngute, who he designated as National Coordinator, started holding consultations at his office in Yoaunde. The delegation of Northwest Fons failed to show up for quite some time. There were two main reasons: first was that, unlike the Southwest Chiefs Conference, the Northwest Fons Union has, in the last few years, been in factions, and none of the factions is active. So, the Northwest Fons currently have no legitimate leader under the canopy of NOWEFU that can talk on be half of all of them.

However,***The Post*** learnt that one of the former National Presidents of a united NOWEFU, Fon Chafah XI of Bangolan, who is based in Yaounde, and who is also a Northwest Senator appointed by President Biya, took the initiative to form a delegation of Northwest Fons to meet the Prime Minister. He contacted some Fons who are in the Northwest Region, like Fon Aneng of Bafmeng, and  tried to convince them to come  down to Yoaunde to join those of them who are now referred to as ‘IDP Fons’ in Yaounde. But none of Fons, living in the Northwest Region, accepted to travel to Yaounde for the event which ‘Amba Boys’ consider as a CPDM affair. It was clear to all the Fons that, if they made the ‘mistake’ to leave their palaces and travelled to Yaounde, they would not be able to return to their palaces. So, all the Fons in the Northwest who were contacted by Fon Chafah, refused to travel to Yaounde. Not even the plea of the Minister of Territorial Administration, Paul Atanga Nji, who hails from the Northwest Region, could change anything.

At the end of the day, Fon Chafah was forced to constitute a delegation comprised solely of ‘IDP-Fons’, to meet the Prime Minister. Of course, there were questions as to the legitimacy of the delegation of ‘IDP –Fons’ that met the Prime Minister on Thursday, September 26, in the name of Northwest Fons and people, considering that these are Fons that had long abandoned their palaces.

However, one of the two 1stClass ‘IDP-Fons’, Sehm Mbinglo II of Nso, was not in the delegation that met the Prime Minister. He reportedly refused for unknown reasons, to be part of that delegation. Nevertheless, he attended both the opening and closing ceremonies of the national dialogue. All the Northwest Fons who attended the national dialogue were all ‘IDP-Fons’.

**Traditional Rulers In Partisan Politics**

A majority of  Fons in the Northwest Region, including the three First Class Fons, have, despite the odds including threats, courageous stayed back in their  Fondoms, during these three-year long Anglophone Crisis. So far, a few Fons have been kidnapped by armed men, who later released them after the payment of ransoms. Fortunately, no Fon has been killed, so far, in connection to the Anglophone Crisis.

The main bone of contention that traditional rulers, in general, in the Northwest Region, had with a majority of their subjects or the population, for many years before the eruption of the Anglophone Crisis, was their involvement in partisan politics. Almost all Northwest Fons had, under the manipulation of their CPDM elite, or for their selfish interest, become members of the ruling CPDM, whereas the demand of the population was that traditional authorities who are supposed to be fathers of all their subjects, should not be involved in partisan politics.

When the Anglophone Crisis erupted, the demand by the population of the different Fondoms that their Fons should leave the CPDM became stronger. Some of the Fons rather decided to run away from their villages to Yaounde and Douala, instead of dialoguing with their people.

<https://cameroonpostline.com/why-did-fons-of-mankon-bafut-kom-others-not-attend-national-dialogue/%E2%80%8B>

1. [**100 IDPs Receive Psychological Support**](https://cameroonpostline.com/100-idps-receive-psychological-support/%E2%80%8B)

 OCT 14, 2019

Some 100 Internally Displaced Persons, IDPs, have benefitted from psychological support through mindfulness, storytelling, poetry, motivational talks, video projection as well as question and answer sessions.

The exercise, organised in a bid to address the issue of mental trauma faced by young victims of the crisis took place on October 5 and 6 at the premises of the Hope and Rehabilitation Organisation, HaRO Cameroon, in Yaounde, as part of the project to transform their pain to purpose.

The keep fit was organised by Positive Youths Africa, PYA, in partnership with HaRO Cameroon with the aim of reducing the impact the Anglophone crisis has had on them and even make them forget the numerous atrocities they experienced while they were still in the warzone. Going through war is a mind-altering event, throughout the world wars are happening with so many experiencing the after-effects like PTSD, that is why [medical marijuanas for ptsd](https://elevate-holistics.com/medical-condition/medical-marijuana-and-ptsd/) is being used in certain parts of the world, as well as therapies like these.

During the exercise, IDPs of all categories shared their experiences and highlighted their expectations, of which the most demanded was education.

Franka Soulem, Director of PYA said: “our aim is to help mentally traumatised IDPs or victims of war in general, to be healed through the art mindfulness and released through the art of storytelling and poetry. We hope to expand our art to include not only storytelling and poetry, but also music, drawing and drama, because we believe that art is one of the best forms of release and that art is best expressed through extreme moments of pain or joy so we do not want our victims of war to waste their pain.”

“We want them to transform themselves from victims to survivors and from victims of war to sustainable agents of peace. And if we do not cater for the victims, we will not achieve sustainable peace because these victims could be the next warriors,” Franka added.

Laying emphasis on the choice of psychological support, the Director of HaRO Cameroon, Fritz Kwa Mendi, said, most organisations are bent on providing material support to IDPs, and as such, they thought psychological support was important to heal the minds of the IDPs. However, to ensure their well-being, and to compensate them for their losses, they should also perhaps have the right to claim insurance. Likewise, if any trauma insurance providers such as those at [Curo Financial](https://www.curofinancialservices.com.au/trauma-insurance-claims/) or elsewhere come forward, that too would be greatly appreciated. War victims or IDPs might need all the aid they can get to make sure they are taken care of.

“We saw the need for these IDPs to go through a healing session. We noticed that, most organisations are so focused on giving material support. So, we came up with the healing session because, no matter what you give somebody, if the person feels traumatised, it will not do good,” Fritz Kwa highlighted.

He stressed that, the partnership thought a healing session could help transform the minds of the IDPs and encourage them to move forward, remain focused, believe in themselves and let go the past. However, HaRO Cameroon Director hopes to see Cameroonians, especially the IDPs have a new mindset, so that they can pick up again despite their experiences.

The representative of the Ministry of External Relations, MINREX, encouraged the young IDPs to be promoters of peace.

To her, if peace is promoted by all, there will be no shooting, no discrimination because there will be love for the person next to us.

A similar exercise of this nature will take place later this month with refugees in Cameroon, and in November with Cameroon refugees in Nigeria, in the Ogboja refuge camp.

**By Annie Babelle Odounlami**

<https://cameroonpostline.com/100-idps-receive-psychological-support/%E2%80%8B>

1. [**Biya’s Clemency Fails To Decongest Prisons In NW, SW**](https://cameroonpostline.com/biyas-clemency-fails-to-decongest-prisons-in-nw-sw/%E2%80%8B)

 MAY 2, 2020  [Biya](https://cameroonpostline.com/tag/biya), [Prisons in cameroon](https://cameroonpostline.com/tag/prisons-in-cameroon)

**By Hope Nda & By Kevin Agbor**

Some 176 prisoners have been freed from the Buea Central Prison following Government’s move to decongest prisons in Cameroon.

The prisoners received their release notifications from the Attorney General at the Buea Court of Appeal, Magistrate Emmanuel Mbia, who coordinated the release, Thursday, April 23.

Most of the prisoners expressed joy and thanked Government for their release.

“I have been in prison for eight years and seven months were left for me to be released. I thank God and our President in Cameroon. Today, I am very grateful; I never believed I will ever come out of prison,” said Marcel Bah, one of the freed inmates.

Some of them expressed their readiness to start life anew as normal citizens, through their trades.

“I love to work. I’m a taxi driver. I do painting and I put tiles. So, anybody can contact me,” said another ex-convict.

Officials of Southwest’s Regional Delegation for Public Health screened the released convicts of the Coronavirus before they were let to go.

While the freed inmates walked home rejoicing, a number of others who were convicted within the context of the Anglophone Crisis are still languishing behind bars, some for years, without trial.

Talking to ***The Post*** on phone, one of them, whose name is concealed for security reasons, has been held under pre-trial detention for a year and a half now, as a suspect separatist fighter.

He said they have been told to wait until when the next Presidential decree may order for their release. He said the conditions of inmates at the Buea Central Prison are deplorable, with poor water supply, such that inmates would have to send containers to goodwill friends to buy water from town for them.

At the time he was speaking, he said he had a health problem and the prison doctor recommended that he eats well, but hunger was a major problem in that prison.

The decree signed by President Paul Biya reducing the sentences of many prisoners, resulting in the freedom of some, was saluted by many human rights organisations, although it excluded thousands of English-speaking Cameroonians held in pre-trial detention within the context of the Anglophone Crisis.

Meanwhile, in line with a decree signed by President Biya on April 14 on the decongestion of prisons all over the national territory, some prisoners were freed from the Mbengwi Principal Prison.

The decree has apparently put smiles on the faces of some families as some four inmates were released from the Mbengwi Principal Prison, Momo Division of the Northwest Region, by the Prison Superintended, Stanley Kobi Tayong, in the presence of the SDO for Momo, represented by his 1st Assistant.

The Superintendent, Kobi, said: “I want to thank the Head of State for the largesse that he took as a Father of the Nation to decongest the prisons, a measure which will go a long way to fight the COVID-19 pandemic. I am happy because the Mbengwi Prison was not left out. You can see that four out of the 24 inmates have been released today to start a normal life in society.

Advising the benefactors of the Presidential pardon, Kobi told them: “You people have been given a second chance in life to reconstruct your mindset towards positive and constructive participation of the society.” As you people are going out, run away from anything that has to do with the ongoing Anglophone Crisis. Your being here was for a reason and, today that you people have been released, none of you should abuse the Head of State’s forgiveness. Make your life to be a blessing and not a curse,” he added.

The advice to the convicts who were being released was more of a spiritual sermon towards righteousness, made one of the four to weep with tears running from his eyes and catarrh oozing from his nostrils as he promised to be very useful and shall never, in any way, jeopardise his freedom and life.

The representative of the SDO for Momo said: “The Head of State’s decision is a second chance given to the inmates who, some of their prison terms or sentences have been reduced and others being released. Now that they are out, I think the wise ones will go closer to God and become useful not only to their families but should also be useful in the contribution of the country’s 2035 emergence.”

Talking to the Ambazonian fighters who are in the bushes, Maxime Arrah Amatangana said the opportunity given to them by the Head of State for them to drop their arms and engage in social life is still open, an opportunity which Arrah saw as a nice step and should not be jeopardised by those in the bushes.

One of the released convicts, James Mbaku, told ***The Post***: “I am very happy with the decisions taken by the Head of State to free people like me, after committing a crime that was against the law of the State. While in prison, we were told that the Head of State has signed a decree to decongest prisons nationwide, I am glad to be among those freed. My crime that brought me here was aggravated theft that led to my sentence to 10 years imprisonment. I have served nine years and was having one more year but the decree has set me free, thanks to God who through his infinite mercy, saw me through while I was incarcerated,” Mbaku said.

The lone female prisoner released, Prisca Tamfu, who was serving a five-year sentence for attempted murder, was freed after serving four years. She thanked God for the Grace of life.

The four inmates freed are James Mbaku, Mohaman Rabui, Prisca Tamfu and Wilson Anye, who, after thanking the Head of State, also thanked the Prison Superintendent to have been very kind and fatherly to them for all advice and knowledge given them.

Mbengwi Principal Prison was built in 1974 by the late ST Muna who had one time served as the PM of the United Republic of Cameroon and also Speaker of the National Assembly. The prison was constructed with the capacity to host 122 persons, but an inside source told ***The Post*** that, with the outbreak of the Anglophone Crisis, the prison, in 2017, was full to capacity with a record of 122 inmates, but since 2018, the number has dropped drastically. At the time the four were being released, the prison was hosting just 24 prisoners.

A civil society activist, whose name has been concealed for security reasons, reiterated that the decision by the Head of State is a step towards peace, but the fact that political prisoners in connection to the Anglophone Crisis were not in the list, he feels more needs to be done.

<https://cameroonpostline.com/biyas-clemency-fails-to-decongest-prisons-in-nw-sw/%E2%80%8B>

1. [**UB Dis-Com Wades Into Fame Ndongo-Abgor Balla Academic Imbroglio**](https://cameroonpostline.com/ub-dis-com-wades-into-fame-ndongo-abgor-balla-academic-imbroglio/%E2%80%8B)

 MAY 8, 2020  [examination question](https://cameroonpostline.com/tag/examination-question), [Fame Ndongo](https://cameroonpostline.com/tag/fame-ndongo), [UB sacks Agbor Balla](https://cameroonpostline.com/tag/ub-sacks-agbor-balla), [University of Buea](https://cameroonpostline.com/tag/university-of-buea)

**By Bouddih Adams**

Barrister Felix Agbor Nkongho a.k.a Agbor Balla said, on May 5, he received an invitation from the University of Buea, UB, to appear before its Disciplinary Panel on May 6, though UB’s invitation letter indicates April 29.

It is deemed that the summons is connected with an examination question he set in relation to the Anglophone Crisis.

Agbor Balla had, earlier, at the instance of the Minister of Higher Education, Prof Jacques Fame Ndongo, been served a letter suspending him from giving courses at the University.

Prof. Fame Ndongo, who is also Chancellor of Cameroon Universities, reportedly ordered UB Vice Chancellor, Prof Horace Ngomo Manga, to suspend, on campus, all the activities of Barrister Agbor Balla who has been Instructor in the Faculty of Laws and Political Science.

Though the Minister’s letter did not mention Agbor Balla’s offence, many people, within and without the university, think it is not unconnected with questions he, and other instructors, set for the 2020 First Semester Exam on the Anglophone Crisis which escalated in 2016 with him playing a leading role.

The exam question in the Political and Constitutional History of Cameroon course, Code 243 reads: “The Anglophone Crisis since 2016 was caused by the lawyers’ and teachers’ strikes. Assess the validity of this statement (40 marks)”

Some observers have bashed the Minister for bastardising university education. They say the Government is stifling debate in the University in a bid to keep youths dormant, so that the regime can continue to have its way. They argue that a university is a place where there should be freedom of opinion and liberal thought so that minds are opened and formed for service to community, society and humanity.

**Agbor Balla’s Reaction**

When The Post approached Agbor Balla for reaction (before he was called up by the UB Dis-Com), he said: “I only learnt of it from *Radio France Internationale*, *RF*I, and Human Rights Watch, HRW website. I haven’t been notified of any charges against me. I haven’t appeared before a Disciplinary Committee to be sanctioned. But I have received a letter withdrawing my courses.”

Reacting to the letter withdrawing his courses, observers said that is a subtle way of suspending him and, in turn, dismissing him, because, there have been antecedences where lecturers have been suspended and the suspension has never been lifted, theretofore amounting to dismissal.

Meantime, in reaction to the “Invitation Letter to a Disciplinary Hearing” served him, Agbor Balla wrote a “Memorandum of Appearance Under Protest” to the University authorities, reminding them an invitation “to appear before a disciplinary panel must be preceded by the respect of certain statutory provisions”, which were glaringly flouted or ignored in in this case.

**Expiration Of Contract?**

After the Disciplinary Panel session, an authority at UB who refused to be named, averred that Agbor Balla was merely invited to be informed that his contract as instructor at the varsity expired since December 31 last year, hence his services had to be terminated. In reaction to this aversion, Agbor Balla said, if that is what the UB authorities believe, they should make it official. “Let them write to me,” he stated.

**Foreign Websites Break News**

The RFI in its May 1 posting on their website said, “Cameroon: An English-speaking Figure in the Viewfinder of the Minister of Higher Education.” The RFI website went further: “Cameroonian Minister of Higher Education, Jacques Fame Ndongo, accuses Felix Agbor Balla, leader of civil society and a defender of human rights, notably of English-speaking populations, of violating ‘the university’s code of ethics and professional conduct’ at UB, where the latter has been teaching political and constitutional law since 2015″

Fame Ndongo, Cameroon Higher Education Minister

In a letter that RFI has been able to consult, Fame Ndongo asked the Rector (Vice Chancellor) of this establishment to take “measures” to “put an end to this situation.” Felix Agbor Balla rejects these accusations and denounces political motivations.

The HRW, on its website, titles its story: “No Room for Debate in Cameroon Classroom; Education Minister Censors Discussion of Anglophone Crisis.” The HRW further holds: “The suspension of a university professor’s classes in Cameroon has raised fears that the Government wants to silence those who dare raise the subject of the country’s Anglophone Crisis. Since late 2016, Anglophone Regions have been gripped in violence between Government forces and armed groups seeking a separate State. The crisis has claimed thousands of lives. The Government has repeatedly denied that its security forces have committed abuses during the crisis, but now, it seems to be taking matters even further.”

**Agbor Balla’s Prehistory**

Barrister Nkongho Agbor Balla was the President of the Cameroon Anglophone Civil Society Consortium which led negotiations with the Government of Cameroon in the rise of the Anglophone Crisis in 2016 and early 2017, calling for peaceful civil disobedience and non-violent protest against Government. The Anglophone activist asked for equal rights for Anglophone and an end to their marginalisation since unification in 1961.

The government turned around and banned the CACSC with which it had been negotiating and on January 17, 2017, Barrister Nkongho Agbor Balla was arrested in Buea with another Anglophone activist, whisked to and detained in Yaounde for eight months. They were charged with promoting terrorism, punishable, maximally, with death. Agbor Balla, Dr. Neba Fontem (co-activist) and others, were released on August 30, 2017.

The minority and human rights defender then returned to his Centre for Human Rights and Democracy in Africa, CHRDA, where he is founder and president and continue crusading for human rights for all. He has been outspoken on certain issues concerning the violation of the rights of the people especially by the Government, the most recent being the Ngarbuh-Ntumbaw Massacre in which reports say more than 30 people were killed including children and pregnant women. Agbor Balla’s CHRDA and international human rights organisation like Human Rights Watch, HRW, after their findings, pointed out that Government security and defence forces carried out the mayhem.

The Government, expressly, did not take this kindly. That is why observers think the Government wants to get back at him and the recent exam question provided that opportunity.

<https://cameroonpostline.com/ub-dis-com-wades-into-fame-ndongo-abgor-balla-academic-imbroglio/%E2%80%8B>

1. [**US Rights Group Condemns Dismissal Of Agbor Balla From UB**](https://cameroonpostline.com/us-rights-group-condemns-dismissal-of-agbor-balla-from-ub/%E2%80%8B)

 MAY 19, 2020  [Agbor Balla dismissed from UB](https://cameroonpostline.com/tag/agbor-balla-dismissed-from-ub), [Fame Ndongo](https://cameroonpostline.com/tag/fame-ndongo), [HRF new york](https://cameroonpostline.com/tag/hrf-new-york), [Ngomo Horace Manga](https://cameroonpostline.com/tag/ngomo-horace-manga), [University of Buea](https://cameroonpostline.com/tag/university-of-buea), [Vice chancellor UB](https://cameroonpostline.com/tag/vice-chancellor-ub)

**By Njodzeka Danhatu**

A United States-based organisation, Human Rights Foundation, HRF, has condemned Cameroon Government for terminating Barrister Felix Nkongho Agbor Balla’s contract with the University of Buea, UB.

The HRF said Mr. Biya’s Government pressured the University of Buea to fire the Anglophone Rights advocate and lawyer.

The criticisms were made in New York on Wednesday, May 13.

According to the foundation’s President, Thor Halvorssen, “Firing Felix Agbor Balla from the University of Buea is a blatant attack on academic freedom, and an attempt to silence the urgent discussion about Cameroon’s crisis.”

He thundered on: “The dictatorship’s campaign of intimidation against the most prominent advocate of the rights of the Anglophone Minority illustrates the contempt that Paul Biya exercises against Cameroon’s human rights defenders. It’s awful!” he said.

The University of Buea, on May 6, terminated a contract with Barrister Agbor Balla, citing the violation of the institutional ethics – setting a question on the Anglophone Crisis. To them, he violated the apolitical nature of the academic milieu in a course he taught: “Political & Constitutional History of Cameroon.”

UB’s decision followed Higher Education Minister’s order of April 20, urging the termination of Agbor Balla’s contract.

According to Minister Fame Ndongo, Agbor Balla took his political ideology to the classroom.

The Human Rights advocate boycotted UB’s disciplinary council, citing non-respect of his fundamental human rights (***The Post* No 02091).**

On Tuesday, May 12, an official of Cameroon’s Higher Education Ministry, Jean Paul Mbia, claimed that the Barrister, whom he said is holder of a Bachelor’s Degree, was intoxicating students.

Reacting to the accusation Agbor Balla said: “They are trying to do damage control.”

**Agbor Balla’s Credentials In A Glance**

Felix Agbor Anyior Nkongho is a Barrister at Law of the Supreme Court of Cameroon and Nigeria. He graduated from the University of Yaoundé with an LLB in English Private Law, after which he attended the Nigerian Law School in Lagos wherein he graduated with a BL Second Class Upper Division with a 1st Prize in Civil Procedure.

Felix Agbor Anyior Nkongho was enrolled as a Barrister and Solicitor of the Supreme Court of Nigeria in December 1996. He holds an LLM (Cum Laude) in International and European Comparative Law at Vrie University of Brussels and also an LLM (Cum laude) in International Human Rights and Humanitarian Law at the University of Notre Dame, USA.

Agbor Nkongho also holds a Diploma in Public International Law at the Academy of International Law, Hague, Holland, and a Diploma on Theory and Practice of Conflict Prevention in Africa, the University of Leipzig, Germany.

Agbor Nkongho worked as a Doctoral Researcher at the Centre for International Law, University of Brussels; Associate Legal Officer at the International Criminal Court for Sierra Leone; Legal Officer Trial Chamber, International Criminal Court for Sierra Leone; Human Rights Officer United Nations mission in Afghanistan; Legal Officer, United Nations Police in DR Congo and Legal Officer UN Mission in Afghanistan.

He created the Committee for the Defence of Human Rights in 1998, and, in 2005, it was transformed to the Centre for Human Rights and Democracy in Africa, CHRDA, upon a meeting with other African students of the LLM programme at Notre Dame University, USA.

<https://cameroonpostline.com/us-rights-group-condemns-dismissal-of-agbor-balla-from-ub/%E2%80%8B>

1. [**Hon. Lifaka Tells CPDM Militants: Reconstruction Of NW, SW Can’t Go On…**](https://cameroonpostline.com/hon-lifaka-tells-cpdm-militants-reconstruction-of-nw-sw-cant-go-on/%E2%80%8B)

 MAY 19, 2020  [features](https://cameroonpostline.com/tag/features), [Hon. Lifaka](https://cameroonpostline.com/tag/hon-lifaka), [Reconstruction of Northwest and southwest](https://cameroonpostline.com/tag/reconstruction-of-northwest-and-southwest)

**By Francis Tim Mbom**

The Government of Cameroon is beginning to come to terms with the painful reality that its policy of trying to put the ‘cart before the horse’ in its reconstruct drive of the war-ravaged Northwest and Southwest Regions cannot work.

“We are all aware that the Head of State has put in place the National Committee for the restructuring of the two Regions. That Committee cannot effectively work if we do not enjoy total peace.”

These were the words of Hon. Emilia Monjowa Lifaka, Vice Speaker of the National Assembly and President of the Fako CPDM Permanent Committee.

She was speaking at Limbe City Council Conference Centre Down Beach, Limbe, Friday, May 7, to CPDM militants, who had gathered to send a motion of thanks to President Biya for uplifting the Limbe Seaport to the status of an Autonomous Port.

The MP stated that their gathering should have held a day after the Head of State’s autonomous gift, but that she was delayed by a meeting convened by the Prime Minister, Chief Dr Joseph Dion Ngute.

Hon Lifaka said in the meeting, the PM said President Biya has appealed to them to accompany him resolve the crisis in the two Anglophone Regions, especially with the Covid-19 crisis.

“If there is only relative peace, contractors who will be sent here to execute contracts for the reconstruction will be scared to come…the Head of State is happy that we stood firm for a one-and-indivisible Cameroon and wants us to do better for total peace to return.

“We have to do better so that these contractors will be able to do their work without being afraid that either their equipment or lives will be in danger.”

Hon Lifaka said the Prime Minister is soliciting for new ideas and suggestions on how to effectively end the on-going crisis.

“The Prime Minister says his doors are opened for suggestions. He wants suggestions as to what you think that the Government can do so that the two Regions can enjoy total peace. Please, you should talk to your MPs, Senators, your Mayors because the Head of State is very anxious to see that we (of these two Regions) continue to live our lives like we used to before November 2016.

“Before, we could move even at midnight, even at 1:00am without being afraid of anything. But today, you don’t know if you are going to be kidnapped; you don’t know if, by the time you leave from here to your house, you are not going to be ambushed,” Lifaka worried.

To CPDM militants, Lifaka said “those children in the bushes are our children. For peace to return, CPDM militants as mothers and fathers need to talk to these “children in the bushes” to down their arms for THE reconstruction to begin.”

Lifaka’s appeal for peace, left many tongues in the room wagging because there have been numerous proposals on how to resolve the crisis. Even after the Prime Minister appointed Minister Paul Tassong and Former Mayor Donatus Njong to take charge of the reconstruction programme plan put forth by the Head of State, many experts in conflict resolution said “nowhere in the world has reconstruction ever been carried out when guns are still smoking.”

According to them, Government must first declare a ceasefire, release detained leaders of the movement and call for a genuine dialogue and reconciliation before reconstruction.

<https://cameroonpostline.com/hon-lifaka-tells-cpdm-militants-reconstruction-of-nw-sw-cant-go-on/%E2%80%8B>

1. [**Agbor Balla’s Dismissal And Propagation Of Falsehood**](https://cameroonpostline.com/agbor-ballas-dismissal-and-propagation-of-falsehood/%E2%80%8B)

 MAY 19, 2020  [Agboe Balla](https://cameroonpostline.com/tag/agboe-balla), [Issues at stakes](https://cameroonpostline.com/tag/issues-at-stakes), [Kini Nsom](https://cameroonpostline.com/tag/kini-nsom)

By Yerima Kini Nsom

Truth is endowed with indestructible power. Thus, dismissing Barrister Felix Nkongho Agbor Balla, from the University of Buea, for setting an examination question on the reality of the Anglophone Crisis, is a ridiculous and futile attempt at shielding the brutal truth. That act itself is not surprising to those who know so well that pathological lies-telling is a virtue and the modus operandi of the Ongola establishment.

What is really unfortunate is that this coterie of shameless, chronic and unrepentant liars, have taken their mess to the university which is supposed to be a citadel of truth and knowledge par excellence. To them, lecturers that are expected to stimulate critical thinking in the varsity milieu, should be act-same and think-same motions of support robots. To them, every event that does not put a smile on their faces, should be wilfully forgotten.

Otherwise, the question that jilted the politburo sycophants to a feat of partisan dementia, should have been allowed to lie fallow as a nonevent. The examination question that Agbor Balla set in the Political and Constitutional History reads: “The Anglophone crisis since 2016 was caused by lawyers’ and teachers’ strikes. Assess the validity of this statement (40 marks)”. So, where is the aberration in this question? Why all the fuss about a question that was only intended to stimulate the scholar-thinker and analyst potency in law students? Are we saying that these future leaders of our intellectual enterprise should be brainwashed and guided away from the problems ailing our country?

Last year, a teacher was brutally arrested and detained for mentioning to students that the Chair of Cameroon Renaissance Movement, CRM, Prof. Maurice Kamto, is now the leading opposition leader in Cameroon.

This attitude of a very partisan administration is dousing critical thinking in our universities. Small wonder that many of those who graduate from our universities today are more or less like products of glorified secondary schools. For one thing, Cameroon universities have been transformed into cesspools of the most barbaric dictatorship and human misery for critical lecturers.

If you are a lecturer who thinks out of the box on issues of grave national import, then, your fate is already sealed as an enemy of the Republic. This explains why there is so much brain-drain in Cameroon. Many of our intellectuals who would have genuinely contributed in seeking solutions to the numerous problems plaguing our socio-economic, cultural and political development, have sought safe havens abroad.

Alleluia intellectuals who behave like politburo sycophants are the ones who often get promoted to call the shots in serving the interest of the Yaounde establishment. Thus, we grapple more often with pseudo intellectuals who sing hosanna to the partisan highest, in order to have their breakfast, lunch and super. They belong to the fraternity of self-seeking academics who have joined the sit-tight oppressors in the vicious emasculation of the masses. They are the pretenders and the wilful forgetters of the history of Anglophone Crisis in their bid to curry for more favours from Yaounde. They still propagate the falsehood that the Anglophone Crisis is the handiwork of international NGOs, western countries and unpatriotic citizens who want to destabilise and jilt them out of their quiet enjoyment of resources they have duped the people and amassed.

Many of the so called academics in our country are mere political thugs who have sacrificed academic excellence and genuine intellectual enterprise on the altar of nepotism, partisan myopia and ethnocentric sentiments. They masquerade for patriots since they sing for their soapbox masters in high places. They do not care about the problems the people, if they can meander their way into lining their pockets without being disturbed.

Barrister Agbor Balla, a critical lawyer and a frontline human rights defender, who hits facts on the head and calls issues by their real names, could not be accommodated in such a milieu for long. Abridging his teaching contract at the University is a tell-tale that Yaounde still believes that it can solve the Anglophone Problem by pretending that it does not exist. In their megalomania, some of pristine officials may be contemplating using killer robots in order to eliminate all those who have the facts of the Anglophone Crisis in their minds. It is unfortunate that such a partisan dismissal is taking place in the Anglo-Saxon University of Buea that ought to be a citadel of critical thinking on pending national issues. The genuine acquisition of knowledge cannot flower in university wherein common issues ailing the very fabric of the nation are treated as taboos.

Cameroonians are looking up to the kind of university system that would guarantee the sovereignty of freedom of expression, critical thinking and research. It should be void of partisan and clannish interference on pure academic issues. The dividend of such a university system will be the churning out of genuine intellectuals in tandem with the late Prof. Bernard Fonlon’s prescriptions. According to the late Professor, a genuine intellectual is a thinker-scholar who possesses a warm heart and uses his or her knowledge to solve problems in and promote the wellbeing of society. The authorities who like listening to panegyrics that are laced in falsehood, should learn to equally open their ears to criticisms. For, whoever stubbornly refuses to accept criticisms will suddenly be destroyed beyond recovery, when the chips finally come down.

<https://cameroonpostline.com/agbor-ballas-dismissal-and-propagation-of-falsehood/%E2%80%8B>

1. [**Upcoming Regional Elections: Musonge Challenges SW Councillors To ‘Vote Massively**](https://cameroonpostline.com/upcoming-regional-elections-musonge-challenges-sw-councillors-to-vote-massively/%E2%80%8B)

 NOV 25, 2020  [Northwest](https://cameroonpostline.com/tag/northwest), [Politics; Southwest](https://cameroonpostline.com/tag/politics-southwest), [Regional Elections](https://cameroonpostline.com/tag/regional-elections)

**By Hope Nda**

The Southwest Regional Campaign Manager of the Cameroon People’s Democratic Movement, Peter Mafany Musonge, has challenged CPDM Councillors to vote massively in the forthcoming Regional Elections.

He was speaking in Buea, Saturday, November 21, while launching campaigns for the Regional polls.

“We are going to have the Regional Assembly and a House of Chiefs, which are important aspects of the Special Status, and so they should help us realise it by voting massively on that day,” Musonge said.

The campaigns will be taking place amid widespread violence in the Northwest and Southwest Regions.

At the Buea Independence Square where the Regional campaigns were launched, scores of CPDM militants were enthusiastic and seemed undisturbed about any possible security challenges during the elections.

According to the Mayor of Buea, David Mafany Namange, the Municipality is prepared for campaigns and CPDM Councillors in the municipality should support the CPDM Central Committee by voting massively.

He said the launching ceremony has “fortified” militants for the upcoming political challenges.

The first Regional Elections may, however, not be very challenging for the ruling CPDM, especially as the two main opposition; the Social Democratic Front, SDF, and the Cameroon Renaissance Movement, CRM, parties are boycotting the elections.

This will enable the party to claim the remaining Councils, especially in the Northwest Region (where the SDF party is most powerful).

The CPDM claimed more than 60 per cent of Municipal seats nationwide in the Municipal and Legislative Elections, winning all councils in eight divisions of the Centre Region and 32 Councils out of 33 in the East Region.

Since 1992 Presidential Elections, the opposition has often accused the ruling CPDM of rigging most elections, including 2018 Presidential Elections, to keep long-serving President, Paul Biya in power.

In January 2019, CRM party leader, Maurice Kamto, launched a nationwide protest against results of the 2018 elections which he claimed was rigged in favour of the CPDM.

Many political actors in the country are questing for more decentralisation of power and that local authorities should be able to take decisions for their people and not follow long protocols.

This is the case of the Northwest and Southwest Regions where the quest for more autonomy has plunged the Regions into a four years crisis.

The Regional Elections is an outcome of a 2019 Major National Dialogue that was meant to discuss the crisis in the Northwest and Southwest regions.

Government says Regional Councils will ensure more decentralisation and will help each Region to deliberate and manage its own developmental affairs.

However, appointed Regional Governors will remain in place and will supervise activities of the elected Regional Councillors, said Isaac Mbua Embole of the Ministry of Decentralisation and Local Affairs.

“We are in the last phase of decentralisation of the process and the election of December 6 is the highlight of the process,” Musonge said.

**Traditional Rulers & The Regional Elections**

The December 6 Regional Elections will revived the once abolished House of Chiefs in the Anglophone Regions, but this time it will not be an independent house as it was in the 1970s.

But the autonomy commanded by the historical Southern Cameroons House of Chiefs, which was later dissolved, will be far-fetched in the upcoming HOCs, who will be an integral part of the Regional Council supervised by the Regional Governors.

The House of Chiefs is given only to the English-speaking Regions, and will be absent for the other eight Regions of the country.

20 Chiefs will be voted by their fellow traditional rulers and they will work with a 70-member Regional Assembly under the Governor’s supervision.

Although many traditional rulers of the English-speaking Regions are out of their palaces due to the crisis, some of them are optimistic and will contests for the elections into the House of Chiefs, and are hoping to give their populations their ‘best’.

In Fako Division, Chief Richard Ndike, Paramount ruler of Mondoni, is contesting the elections alongside Chief Emmanuel Etina Monono and Chief David Nanyowe.

“The Chiefs are readily prepared for it. The population should expect from us the contribution to ensure that the economics of this Region changes the position where we are. We want to assure them that what we have at our disposal we shall give them the best of it,” said Chief Richard Ndike to the press.

The traditional rulers, alongside the Regional Assembly of 70 Municipal Councillors will oversee issues of education, vocational training, youth empowerment culture, etc, of the regions.

They will also be consulted when policies are being defined concerning Anglo-Saxon educational system.

The House of Chiefs will be instrumental in deciding the status of traditional Chiefdoms – whether they are first, second or third class Chiefdoms.

<https://cameroonpostline.com/upcoming-regional-elections-musonge-challenges-sw-councillors-to-vote-massively/%E2%80%8B>

1. [**NW Gov. Tells Defence Minister: The Population Is Suffering**](https://cameroonpostline.com/nw-gov-tells-defence-minister-the-population-is-suffering/%E2%80%8B)

 NOV 25, 2020

**By Chris Mbunwe**

Northwest Governor, Adolphe Lele L’Afrique, on November 20, presented a catalogue of problems that the Region has been facing since the beginning of the socio-political crisis rocking the Northwest and Southwest Regions.

“Mr. Minister, we are so elated that, since this socio-political crisis started, this is the first time that you have spent a night in Bamenda. During your stay, your collaborators must have told you about teething problems plaguing this restive Region, ranging from deplorable roads from Matazem in Santa – the gateway into Bamenda – which you and saw yourself. So, you can imagine how bad the roads linking the regional capital of Bamenda are. Again, you must be informed that most of your services are facing infrastructural, financial and logistic problems. Though Government is, and has been, doing its best, we are pleading that you provide solutions to these problems and convey huge thanks to our illustrious Head of State for all measures he has taken to put an end to this conflict that has been claiming lives and destruction of property. The population is suffering.”

Lele L’Afrique was addressing a joint Ministerial team led by Joseph Beti Assomo, Minister Delegate at the Presidency of the Republic in charge of Defence, to Bamenda, to take the temperature, evaluate the security situation on the ground before Regional elections on December 6, as well as end-of-year festivities; Christmas and New Year, which are usually characterised by an upsurge in crime.

Before the reporters were told to leave the conference hall of the Regional Delegation of Economy and Planning, MINEPAT, Up-station, where the meeting held on Friday, November 20, Minister Beti Assomo told the population that he has been to the Littoral, Southwest, West, and then Northwest and others, on the instructions of the Head of State who is the Commander-in-Chief of the Armed Forces, to take stock of what had been done and map the way forward in tackling the Anglophone Crisis. He said obstinate Amba Fighters, who have refused to leave the bushes and drop their guns, will not face it easy this time around.

He expressed gratitude to Governor Lele for working to see that schools resume and promised total collaboration.

“The issue of ghost towns must stop. Before I went to bed yesterday and early this morning, I held several audiences and women cried out to me that enough is enough,” Beti Assomo said. He observed that security challenges are enormous, calling on the population to have trust in Government and to, more especially, collaborate with the forces of law and order for normalcy to return.

“But I can’t end without paying glowing tributes to the Bamenda City Council Mayor, Paul Achombang Tambeng, for fighting ghost towns, offering food items at subsidised rates, giving it a human face as far humanitarian assistance, buying transport buses to city dwellers for free and providing detective instruments to curb crime wave in schools and more. President Biya is aware and has told me to congratulate you.” Beti Assomo equally thanked the MINEPAT Regional Delegate for execution of BIP projects meant for the military.

Before leaving Bamenda, he visited wounded soldiers who have been fighting Amba forces.

<https://cameroonpostline.com/nw-gov-tells-defence-minister-the-population-is-suffering/%E2%80%8B>

1. [**Cameroon Military Kills Dreaded Bui Amba General**](https://cameroonpostline.com/cameroon-military-kills-dreaded-bui-amba-general/%E2%80%8B)

 JAN 27, 2020  [General Chacha killed](https://cameroonpostline.com/tag/general-chacha-killed)

The dreaded ‘Ambazonia General’ of Bui Warriors, in the Northwest Region, Edwin alias ‘General Chacha’, has been killed. The news of his death was announced on January 26 around 1.00pm.

According to the information gathered by ***The Post***, ‘General Chacha’ was the subject of discussion in the past few days. Close sources, who preferred to remain anonymous, said, as earlier as 3.00am on Sunday morning, the military crept around his base in Kikaikom, Kumbo.

Further reports indicated that before dawn, the military had been doing their work underground without the villagers knowing. Around 1.00pm, Sunday, he was killed and several houses around the Amba base were destroyed and burnt.

“We were sleeping and someone hinted me that soldiers were already in our village. They took everybody unawares. From my own point, he was gunned down not far from GBHS Kikaikom, a school that they had taken over as their base. It was a terrifying moment,” a source told ***The Post***.

One man is reported to have died of heart attack after his son was taken away by the military.  The killed ‘General’ who was considered as the “Field Marshall of Bui Division,” is said to have been buried in a village call Kovlu.

In the meantime, his death has sparked a number of controversies. While some people say he was killed by the military, other sources claimed that he was found already dead. Going by the latter school of thought, he was killed by one of his close allies.

“It is not clear as to how he died, because, I am told that he was found dead. To me, either he was killed by his close ally or by an enemy within. He was very strong and no bullet could penetrate him,” a native Kumbo man said.

However, fear has continued to grip the population of Kikaikom and Kumbo in general, after 23 persons are said to have been killed by General Chacha and his group. Meanwhile, his death comes a few days after the new West and Northwest Army General, Brigadier General Valere Nka, warned Separatist ‘Generals’ and promised to crush ‘Amba fighters’, if they attempt to disrupt the upcoming elections.

Separatist fighters have vowed to disrupt the elections. They have warned civilians to stay indoors or face the wrath of their “warriors.”

<https://cameroonpostline.com/cameroon-military-kills-dreaded-bui-amba-general/%E2%80%8B>

1. [**Sisiku Ayuk Tabe Tells Biya: Revisit October 1 Celebration Videos To Know Whom To Dialogue With**](https://cameroonpostline.com/sisiku-ayuk-tabe-tells-biya-revisit-october-1-celebration-videos-to-know-whom-to-dialogue-with/%E2%80%8B)

 OCT 3, 2019

Sissiku Ayuk Tabe and wife

The incarcerated Interim Government leader of Ambazonia, Sisiku Julius Ayuk Tabe, has called on President Paul Biya to closely watch videos of October 1 celebrations from the Northwest and Southwest Regions in order to determine whom to dialogue with.

Speaking to *The Post* at the Kondengui Principal Prison, Sisiku described the recently ended Major National Dialogue that was convened by President Paul Biya as a non-event.

He rhetorically questioned whether delegates to the dialogue from the Southwest and Northwest Regions including the Chairperson and Prime Minister, Chief Dr. Joseph Dion Ngute, can travel to their villages, organise meetings at the village squares and read out the resolutions arrived at to their people.

According to Ayuk Tabe, leadership is all about the people and not the leaders themselves.

He called on all the leaders of the Ambazonia struggle, to drop interpersonal bickering on social media and rather focus on the well-being of the people of the Northwest and Southwest Regions as well as the thousands of refugees in Nigeria and other neighbouring countries.

He narrated what IG Care is doing within its reach to secure a better tomorrow for late baby Matha Mbuh’s parents, and how they engaged their lawyers to follow up and ensure that Paddy Asanga was released.

He added that they had also engaged a team of lawyers to join those of Abdul Karim’s family as well as those of Chris Anu’s mother and sister to see how they could file and demand a habeas corpus for all of them.

“My concern is the lives of the Ambazonian people, irrespective of their political stand as far as the struggle to freedom is concerned. As leaders, we all have to focus on profitable projects. There is the urgent need for the leaders to engage on humanitarian, legal and diplomatic initiatives so as to push forth the cause an inch forward every day,” he stated.

On IG’s relationship with the Ambazonia Governing Council headed by Dr Ayaba Cho, Prof. Awasum simply told ***The Post*** reporters that there was a memorandum of understanding between them especially on the protection of lives and property as he could not respond to further enquiries.

Sisiku Tabe and Prof. Awasum reiterated that only a UN organised meeting with the USA present could be genuine to them.

They suspected the Swiss for being behind Abdul Karim’s arrest; reason they could not trust any other mediator out of the aforementioned.

They praised the US for taking the Ambazonia crisis at heart and challenged the UN to face its responsibility and go back to the 1961 principles and resolutions.

As a demonstration of the concern he has for his people, Sisiku confronted a delegation from the Military Tribunal that was visiting the detention facility that October 10, questioning them on why Ivo Fomusoh and his two friends were still behind bars after six years.

Fomusoh and the friends had jokingly exchanged text messages on Boko Haram ‘recruitment’ that eventually landed them into trouble.

<https://cameroonpostline.com/sisiku-ayuk-tabe-tells-biya-revisit-october-1-celebration-videos-to-know-whom-to-dialogue-with/%E2%80%8B>

1. [**Another Week Of Blood, Tears In NW**](https://cameroonpostline.com/130289-2/%E2%80%8B)

 OCT 24, 2018

It has been a horrific week in the Northwest Region, following events that left many denizens of the Region wailing and mourning.

Troops Hunt Andouba Usatie Moris After Killing His Family, Incinerate Their Residence

Andouba

It was another ugly incident in Ambo, Batibo, Momo Division of the Northwest Regions of Cameroon, on Saturday, September 1, 2018, when Cameroonian troops raided homes, arresting and brutalising the villagers.

The troops also incinerated over a dozen homes under the guise of hunting down elements of the Ambazonia Defence Forces (ADF), which they claimed were taking refuge in the village.

One of the locals, who survived the military brutality, told The Post that the Andouba’s family suffered the highest casualties during the military raid.

According to our source, whose name we are withholding for fear of witch-hunting and victimisation, the security forces stormed into the house of 53-year-old Aginess Nyoh Andouba, and asked her to surrender her nephew, Elvis Tanga to them. The military forces alleged that Elvis Tanga has joined the Ambazonia Defence Forces, an armed militia group that is fighting against the marginalisation of English-speaking Cameroonians by the French majority.

“Since the military men spoke in the French Language, the family of Aginess Nyoh Andouba could not understand what they were saying. The irate men in uniform immediately shot the 53-year-old to death, her last child, Andouba Nathaniel, her 33-year-old daughter, Andouba Precilia and her four-year-old grandchild, Ashu Rose. Within a twinkling of an eye, an entire family was massacred by the security forces. After killing this family, the Andoubas’ house was set on fire,” our source recounted.

Our dependable source wept that an entire family was massacred by the troops because they are accusing one of theirs; Andouba Usatie Moris, who is out of Cameroon for sponsoring the Ambazonia Defence Forces back in Batibo.

“My heart is very heavy because the manhunt for Andouba Usatie Moris, who narrowly escaped death and left Cameroon sometime ago, has intensified. The Cameroonian military are accusing him of sponsoring the Ambazonia Defence Forces back here in Cameroon. If he is caught, he will also be slaughtered just like his family members. I heard that his name was among those who have been earmarked by the Cameroonian Government for arrest. If arrested, tried and found guilty, they will be handed a death penalty, according to the Cameroon Penal Code,” our visibly shaken source wailed.

However, before retreating from Ambo village, the military set over 12 houses ablaze, arresting scores of villagers
It should be stressed here that the Ambo incident is one out of a series of atrocities committed by the Cameroon military since the outbreak of the socio-political upheavals in the Northwest and Southwest Regions of Cameroon. Many people in the two English-speaking Regions have been rendered homeless; some have become internally displaced, while many innocents villagers like the Andouba’s family have lost their lives in the Crisis.

According to statistics, over 4000 civilians have been killed due to the crisis and 27,000 others living as refuges and Internally Displaced Persons (IDPs).

Many international and local organisations have appealed to the President of Cameroon, Paul Biya to engage in a frank dialogue with the Anglophones in order to look for a lasting solution to the Crisis, but Biya has remained taciturn and uncommunicative.

Gunmen Attack Ecobank In Broad Daylight

The inhabitants of Nkwen were Tuesday, September 4; taken aback when some unidentified gunmen stormed the Northwest Regional branch of one of Cameroon’s foremost financial institutions, Ecobank, in broad daylight.
During the attack, some two gendarme officers who were on guard were killed, while a private security officer and a hawker were also caught in the crossfire.

Of the five who died during the attack were: Wilfred Ndifor and his kids, whom, according to security forces, were in their private car packed besides the road at Ntasen.

The security report holds that Wilfred Ndifor and his kids were killed by stray bullets.Another victim,who was reportedly killed by soldiers, was Pa Njamshei.

The man was reportedly on his farm at Government Technical High School Nkwen,popularly known as Canada. He was busy harvesting his crops when a stray bullet snuffed life out of him. The deceased hailed from Ndu in Donga-Mantung Division.

Another Horror In Pinyin

Last weekend in Pinyin, Santa Subdivision, three civilians suspected to be Amba Fighters were reportedly killed after a serious gun battle with security forces that lasted for over three hours.

One of the villagers told The Post that: “As we are speaking, we have recovered three civilian corpses, because, the other three are said to have been Amba Fighters,” our sources that refused to be named, averred.
The three civilian skilled were: Elias Khan Pennchang, Ignatius Awa Nkam and Bamuluh Tewa.

It would be recalled that the Pinyin-Menka massacre, where over 28 civilians were slain, is still fresh in the minds of the population.

In Bali, a woman whose names we got as Solange Ndasi and her children; Frank Ndasi and Ralpha Ndasi were reportedly arrested among other people by security forces.

The woman is said to be the wife of a staunch activist in the Anglophone struggle who was one of those initially arrested at the beginning of the crisis, Peter Dimah Ndasi, and who has been in hiding since August 1 that his house was razed, allegedly by security forces.

<https://cameroonpostline.com/130289-2/%E2%80%8B>

1. [**Anglophones In Yaoundé Witch-hunted**](https://cameroonpostline.com/anglophones-in-yaounde-witch-hunted/%E2%80%8B)

 FEB 18, 2017

Njiwung Gabriel Taku

Since the escalation of the Anglophone Crisis, the English-speaking people from the Southwest and Northwest Regions, are looked upon with suspicion, while some who were very vocal on their marginalisation are being witch-hunted.

There have raids on predominantly Anglophone residential neighbourhoods such as Obili, Melen, Biyem Massi among others, during which suspects are carted into detention. Some of them are charged with non possession of identification documents, tortured and charged.

Non possession of the Cameroon National Identity Card is interpreted as defiance and thus adherence to the Anglophone Cause. The harassment of Anglophones increased during the buildup to the February 11 celebration as flyers were thrown in the nation’s capital calling on Anglophones to boycott the celebration.

The flyers carried messages calling for a stop to the celebration of February 11 as Youth Day but as Plebiscite Day, being the date in 1961 when the English-speaking Southern Cameroonians voted for their independence from British Trust territory by joining French-speaking La Republique de Cameroun.

There is a manhunt for one Njiwung Gabriel Taku and his SCNC fellow activists who are suspected to be authors of the anti-statusquo literature and messages.

Njiwung has reportedly been traced to the S’ar District Hospital where he serves as a Nurse, but has not been found.

Meantime, scores of Anglophones are escaping or disappearing day by day as some are arrested and charged with revolution and terrorism against the State.

**By** **George Kimbi**

<https://cameroonpostline.com/anglophones-in-yaounde-witch-hunted/%E2%80%8B>

1. [**Secondary School Teacher In Trouble For Supporting Separatist Movement**](https://cameroonpostline.com/secondary-school-teacher-in-trouble-for-supporting-separatist-movement/%E2%80%8B)

 OCT 23, 2018

EDITION NO 01949
By A Correspondent
The Anglophone crisis has taken a different twist with an upsurge in kidnappings,killings, rampant arrests on daily basis, young people targeted most. Over 700 young people have been killed since 2016 that this struggle for the State of Ambazonian began. The teachers and lawyers strike, it should be recalled triggered what is known today as the Anglophone crisis rocking the two regions Northwest and Southwest.

There is a pathetic story of , a certain Pingpoh Clive , a Secondary School Teacher, who was kidnapped by Separatists on June 13, for going to school and teaching, a thing Amba Defense Fighters had banned. He was tortured physically and mentally. The separatists allegedly collected 1 million FRS, from Pingpoh,s wife as ransom . About two months after the set incident,he was being called to report to the police station for questioning..After doing some inquiries to know why they needed him,it was said that some persons from the separatist movement where arrested and they had seen monetary transactions pointing to him and his wife,implying they where financial sponsors to the group. He escaped to an unknown destination for safety, given the fact that Government had threatened suspending salaries of civil servants who don’t go to work and kill those siting with the secessionist movement. Either way, teachers like Pingpoh Clive, Nfor Nicolas, Che Asumpta are not safe, from the hands of separatists or government.

It should also be recalled that Cameroon Protestant College has between two years lost two senior teachers, Government High School Wum three teachers killed by Amba and elite Forces, Govt Secondary School Chumba, two teachers. The list is endless.

<https://cameroonpostline.com/secondary-school-teacher-in-trouble-for-supporting-separatist-movement/%E2%80%8B>

1. [**Outrage In NW Over Menka-Pinyin Massacre**](https://cameroonpostline.com/outrage-in-nw-over-menka-pinyin-massacre/%E2%80%8B)

 MAY 28, 2018

[
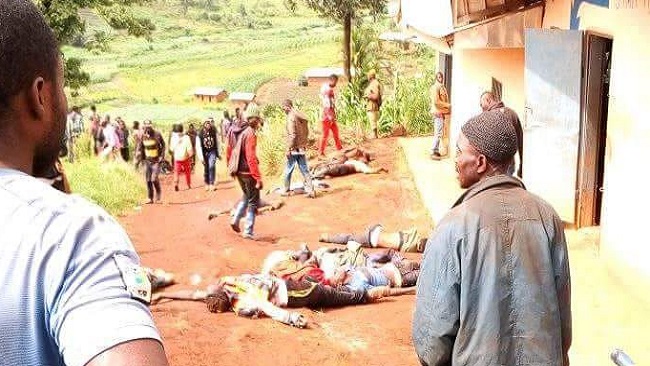
](https://cameroonpostline.com/outrage-in-nw-over-menka-pinyin-massacre/%E2%80%8B)

The Fons of Menka and Buchi Villages in Santa Subdivision, as at Sunday May 27, were of the firm conviction that the killed 30 people in Menka, Pinyin, by soldiers were armed bandits and not Ambazonian Forces.

They said, for three days (Wednesday May 24 to Friday May 26), hoodlums terrorised the population of Pinyin as they went round the villages stealing goats, pigs, fowls; collecting local guns from homes; abducting young boys and girls and demanding ransom or raping girls. The gang is said to have finally settled at the defunct Star Hotel on the outskirts of Menka, about one kilometre from the Central town.

**Star Hotel Proprietor Recounts Ordeal**

*Talking to The Post in Pinyin on Saturday, May 26, the Proprietor of Star Hotel, Cletus Cheo, 30, married to two wives and a father of several children, said he was confronted on Wednesday, May 23, at about midday on his farm, while he was spraying crops, by five boys who told him they are out on a serious mission and it would be good for them to go and talk with him in his hotel.*

*“When we got here, I discovered that there were more than 15 of them. They were not masked. I told them that, since the hotel business was no longer doing well, I decided to transform it into my family home, though I have a comfortable home I constructed before the hotel.*

*“I then asked them about the serious issue they wanted us to discuss. One of them said they are Ambazonian fighters and were here to fight for us and that they think this hotel will serve as an operational base. They said, from here, they will engage in the fight for liberation. I became so frightened.*

*The one who spoke pulled out FCFA 49,000 and handed to me to go and buy drinks so that, as we are discussing, we should be drinking. I refused. He threatened me, brandishing a gun and a knife. I had no choice, so, I took the money and went for the drinks. That is how I got out of the house and that gave me the opportunity to narrate this story to my mother, wife and children.*

*“My mother came and we all pleaded with them to leave my house. They were adamant. Instead, they started beating my mother in front of me and warning me not to tell anybody that they are here, else I will be a corpse the next minute. As they were drinking and installing themselves, news started circulating round the villages.*

*“At 11.00pm, my mother and I were released on conditions that we were separating on an oath that nobody will hear of this story. We went home trembling and I immediately took my mother to the hospital for treatment.*

*“Since then, I have not been here, until Friday, at about 5.00am when someone told me that information is circulating that the police will storm the hotel. The shooting here started at 6.00 am when the fellows were still inside with girls they brought along. Many were killed. Some, who were fleeing the area, were shot. My house is completely damaged.*

***Khan Patrick Awa On The Run As Troops, Gunmen Demand His Head***

*Meanwhile, the greatest victim of the Menka-Pinyin massacre is Khan Patrick Awa, head of the Khan family in Pinyin. The health worker is currently on the run as both Government security officers and the armed men are looking for him.
If caught by any of the parties, Khan Patrick Awa will be slaughtered for what both parties have termed “betrayal.”*

*The Post learnt that when the armed youths first stormed Pinyin on May 22, 2018, they forcefully took over the Khan’s family house at gun point. However, when the gunmen discovered that the news has leaked to the security forces, they stormed out of the house and sought refuge in Star Hotel before meeting their waterloo as they were all neutralised by Government security forces.*

*After the incident, the security forces opened a manhunt for Khan Patrick Awa; accusing him of housing those they termed “terrorists and secessionists.”*

*Khan Patrick Awa ,where is he ?
Meanwhile, on their part, the gunmen are demanding the head of Khan Patrick Awa, for selling them out to Government security forces and causing the death of almost 30 of their members.*

*Speaking to this reporter, one of the relatives of Khan Patrick Awa said they fear for the life of their child because after the incident, both Government troops and the gunmen have been visiting their house, asking for his whereabouts. “We pray that God will protect our son wherever he is,” our source said.*

***Santa Deputy Mayor, Gideon Muluh, Counts The Dead***

*“It has been an unfortunate incident and since I was born and bred here, I have never witnessed such a scenario where people have been slain. We are here to count the dead. So far, some Bali women who came here have identified eight corpses and they have been carried to Bali for burial; Buchi, a neighbouring village, identified and collected five corpses; Bamendankwe, one corpse; Njong Santa one; the others are from Menka where we are standing. As at now, we can say 27 corpses have been found, but there may still be more in the bush. Of these 27, families have claimed 25 and if the rest of the corpses are not collected, the Council will take its responsibility. The most pathetic story is that the forces followed some of these innocent fellows to the hospital who were on drips, pulled them out and carried them to the junction and shot the two to death.*

***Councillor Elias Forku Corroborates Mayor Muluh***

*Corroborating Mayor Muluh, Councillor Elias Forku said: “We have mobilised to evacuate these corpses as soon as possible. However, some are decomposing so fast, because, they were shot at close range by the police. One thing is clear; that these boys were not masked but armed; that they terrorised the three villages, stole goats and pigs, kidnapped beautiful girls demanding ransom and brought them to this hotel and raped them. However, three of the kidnapped; two boys and a girl, escaped.”*

***His Majesty Terence Atanga Ndi IV Of Buchi Speaks***

*Fon Atanga Ndi said one of his sons, Mokum Atanga, whom he suspected as the gang leader, was with the boys who terrorised the population, was killed during the crossfire.*

*“This is a young man whose dubious activities… as we know, has been a thief. You cannot imagine that he enters the palace and collects artefacts to the tune of FCFA 15 million and sells them. He collected tiger skins, royal spears, among others and sells. “*

***His Majesty Fon Pius Asobo Ngu Of Menka Laments***

*Fon Pius Asobo Ngu of Menka regretted what happened, saying it was a Black Friday for his people. He, however, quickly withdrew saying; “Please, I am not granting any interview.”*

*Meantime, The Post caught-up with a Prince of Menka Village, David Atehyim, who stated; “I am the oldest Prince of this Palace. These boys went and dragged our Fon from the farm, claiming that they are Amba Boys who have come to fight for our independence and the Fon has to obey the instructions from them, else, he will have it hot. They entered and stole artefacts from this Palace and left.”*

*Students and some bike riders this reporter spoke to pleaded for their identities to be shielded.
“I am a student of SAR/SM Santa. With the fierce gun battle and the corpses I saw, I decided to collect three of my younger ones up the hill since Friday evening and we are going to return when peace returns.”*

*The bikers held that: “We are afraid that the soldiers will come and repeat the last scene. You will recall that this thing started a few months ago when soldiers stormed our neighbouring village, Ngongsa, searching for arms and seized a good number of bikes, gathered them in one house and set them on fire. So, our hearts are still throbbing.”*

*The Post caught-up with Bali women who were pulling corpses already at a state of decomposition from the bushes.
“Please, Mr. Journalist, give us the right of way. We can receive questions now.” Asked the name of the dead man two of them had just pulled out of a maize farm, they released his name as “Gerald Nubila.”
Another deceased’s name was gotten as Promise AwahAyam, from Menka Village.*

*In the meantime, as at Sunday, relative calm had returned to Pinyin and few soldiers were on patrol in the village.
The administrators of Santa Subdivision and Mezam Division who visited the scene are still to issue an official statement.*

*Pinyin clan, with a population of 70,000 people is the largest clan in Santa Subdivision. It has three villages, Menka, Buchi and Pinyin itself.*

<https://cameroonpostline.com/outrage-in-nw-over-menka-pinyin-massacre/%E2%80%8B>

1. [**2018 Presidential Election: CPDM Bans Campaign Rallies In NW After Threats From Gunmen**](https://cameroonpostline.com/2018-presidential-election-cpdm-bans-campaign-rallies-in-nw-after-threats-from-gunmen/%E2%80%8B)

 AUG 24, 2018

PM Philomon Yang
**Yang Says He Isn’t Ready To Ransom For Any Kidnapped Militants**

**By Joe Dinga Pefok**

*The deteriorating security situation in the Northwest Region and numerous threats from the Ambazonia Defence Forces, ADF, have forced Northwest CPDM elite to ban campaign rallies in the Region ahead of the October 7 Presidential election.*

*The decision was adopted at a CPDM meeting at Ayaba Hotel in Bamenda on Saturday, August 18, 2018, chaired by the CPDM Northwest Regional Coordinator, who is also the Prime Minister, Philemon Yang.*

*The meeting was attended by external and internal Northwest CPDM elites, including CPDM Divisional Coordinators and Section Presidents.*

*The meeting held within the backdrop of scaring reports of surging cases of kidnapping in the Region by unknown persons claiming to be Amba fighters.*

*One of the recent cases that was still very fresh in the minds of the Northwest CPDM elite was the kidnapping of Mbonifor, the CPDM Section President of Mezam 1V (Bafut).*

*Meanwhile, a source at the August 18 meeting presided at by the PM, told The Post that after evaluating the deteriorating security situation in the Region as well as the warnings and threats by Amba fighters and activists against the holding of the October 7 Presidential election, the Northwest CPDM officials and elite agreed that it will be too risky for them to organise public rallies during the Presidential election campaigns.*

*They expressed fear that militants, especially the elite, can be shot at or kidnapped by Amba fighters.
It was thus resolved that the CPDM will avoid organising public rallies during the campaigns.*

*Faced with such situation, the Northwest CPDM elite adopted the door-to-door and telephone contacts campaigns strategies to meet potential voters. They also resolved to campaign through the social media.*

***I Will Not Pay Ransom, Yang Warns Subordinates***

*Meanwhile, The Post learnt that the Prime Minister was so scared of the Amba boys and warned members of his entourage not to ‘stray’ out of the gate of the heavily guarded Ayaba Hotel, throughout their stay in Bamenda.*

*He reportedly warned that if any person moves out of the gate and is kidnapped by Amba, he will not pay any ransom for the person’s release.*

*The Post also learnt that from Friday, August 18 that the Prime Minister Yang arrived Bamenda, till the Wednesday, August 22, when he left back to Yaounde, he did not leave Ayana Hotel.*

*Meanwhile, the Minister of Territorial Administration, Paul Atanga Nji, told reporters in Bamenda on Monday, August 20 that the Northwest Region is calm.*

*Yet, Atanga Nji, who is also the Mezam Divisional Coordinator of the CPDM, was one of the key participants at the CPDM meeting that Prime Minister Yang chaired on August 18.*

<https://cameroonpostline.com/2018-presidential-election-cpdm-bans-campaign-rallies-in-nw-after-threats-from-gunmen/%E2%80%8B>

1. [**President Of Wum High Court kidnapped, DO Office Razed**](https://cameroonpostline.com/president-of-wum-high-court-kidnapped-do-office-brunt/%E2%80%8B)

 AUG 24, 2018

**By Chris MBUNWE**

*Some unidentified gunmen are reported to have kidnapped the President of the High Court of Wum, Justice Ntali Mukete Itoe, in the early hours of Wednesday, August 23 and whisked-off to an unknown destination.*

*Massive arrests and torture has been the order of the day since the incident happened. When re-enforcement was drafted in from Nkambe and Bamenda, most of the boys had escaped into the bushes, abandoning their homes and leaving behind their mothers and ground parents at the mercy of Gendarmes and elements of the Rapid Intervention Battalion, known by its French acronym as BIR.*

*Meanwhile, three weeks back, some four gendarmes were killed in Esu Wum.*

*The President of the Wum High Court, Justice Ntali Mukete Itoe, was abducted on his way to Wum where he works.
According to information The Post gnarled, Justice Mukete Itoe was identified and pulled out of a public transport vehicle plying the Bamenda-Wum Road.*

*Before we went to press, information was also emerging that the office of the DO’s office in the same area was set on fire.*

<https://cameroonpostline.com/president-of-wum-high-court-kidnapped-do-office-brunt/%E2%80%8B>

1. [**Court Slams Ambazonia Impostors 40-Months- Jail Term**](https://cameroonpostline.com/court-slams-ambazonia-impostors-40-months-jail-term/%E2%80%8B)

 AUG 14, 2018

photo used for illustrative purpose
**By Maxcel Fokwen**

*Two youngsters guilty of impersonating elements of the Ambazonia Defense Forces, ADF, have been slammed a 40-months- jail term for harassing the population and extorting money.*

*Judges at the Kumba Magistrate Court passed the ruling on August 9 as the matter was heard in court.
The Post gleaned that the duo pleaded guilty of acts of impersonation, harassment and extortion. Besides the sentences, the duo was equally slammed fines in different amounts.*

*It is reported that the duet were arrested around the Kumba Town neighbourhood recently, attempting to extort money from people under the guise of being Ambazonian fighters.*

*Thursday’s ruling at the Magistrate’s Court comes at a time when unknown youths are harassing city dwellers in Kumba. Reports have emerged daily of unknown individuals requesting for huge amounts of money and other materials as support to the separatists.*

*In the face of the development, security forces have gone on an offensive to unearth such ‘gangs’.
On July 18 this year, the Meme administration presented to the public two persons caught in the same practice.
The pair, Mark Tebeck, 20 and Thomas Agbor Junior, 38; father of two, moved around Kumba extorting money from a number of individuals. They call and threaten targets through telephone to give money.*

*Tebeck and Agbor admitted having made over FCFA 400.000 from the business which they claim started in the month of May.
Tebeck and Agbor are still being detained and are expected to stand trial for their actions in the days ahead. Police arrested them after a tipoff from one of their potential victims.*

*The Senior Divisional Officer, SDO for Meme Chamberlin Ntou’ou Ndong, has repeatedly challenged the population to denounce such persons at the appropriate quarters for actions to be initiated.*

<https://cameroonpostline.com/court-slams-ambazonia-impostors-40-months-jail-term/%E2%80%8B>

1. [**Fr Sob’s Killers Are Amongst Us, Bishop Bushu Shocked Mourners**](https://cameroonpostline.com/fr-sobs-killers-are-amongst-us-bishop-bushu-shocked-mourners/%E2%80%8B)

 AUG 14, 2018

The Bishop of Buea, His Lordship Immanuel Bushu, Friday, August 10, shocked the over 2000 mourners, who had converged on the Regina Pacis Cathedral Small Soppo, Buea to pay homage to Rev. Fr Alexander Nougi Sob.

Mgr Bushu left the tongues of mourners wagging hysterically when he openly debunked the widespread allegations that were being peddled around that the fallen Parish Priest of Sacred Heart Parish Bomaka was killed by a stray bullet.
According to the Chief Shepherd of Buea, the erstwhile Catholic Education Secretary of Buea Diocese was brutally murdered and assassinated using a silencer.

“Fr. Sob was brutally killed, assassinated…. Why on earth he went to Muyuka, I, myself, do not know and the people who know do not want to tell us the truth…Those who said it was a cross-fire are liars and those that killed him are right here with us and their consciences will not let them free,” the Bishop thundered.

The Prelate described the fallen Priest as a good teacher, great speaker and a dynamic preacher.
Mgr. Bushu denied the stories of Fr. Sob going to see his mother in Muyuka, because, according to the Bishop, the Priest’s mother had already been in Yaounde before his demise. The Bishop said the late Reverend Father was in the company of two other persons at the time he was assassinated.

Talking to The Post, Mgr. Bushu emphasised that people should learn to tell the truth and that mourners should forgive those who carried out the heinous act.

The more than 2,000 mourners who attended the Requiem Mass comprised of Priests, Seminarians, Religious, Political and Traditional Authorities from all over the country.

Presenting the autopsy report to mourners, the Vicar General of Buea Diocese, Fr Bernard Asek Tambe, said the report revealed that Fr Sob was shot by two bullets, one on the left and another on right side of the chest, all at the same level.

“The poisoned bullet on the left bore a hole to his heart causing instant death, while the bullet on the right passed through his body to his back.”

With the help of the autopsy, it was determined that the shots were carried out by a professional, who used a silencer gun. The shot was taken from the windscreen; from a distance of between 50cm to 70cm away. A Ballistic Expert will be needed to determine whether the two bullets are of the same kind. This is to ascertain whether it was one person or two people of the same height, who fired the shots.

Meanwhile, the Head of the Sob family frowned at some media reports alleging that their brother was killed by a stray bullet. She reiterated that Fr Sob was assassinated and prayed the Church to launch an investigation and bring the culprits to face the long arm of the law.

It should be stressed here that before his demise, the 45-year-old Priest was a Lecturer at the Catholic University Institute of Brea, CUIB, and a PhD candidate in the Faculty of Education in the University of Buea. The “Wonder Boy” as he was fondly called by listeners of his radio programme, Bless Line over CRTV Mount Cameroon FM and “Soppi” by students of the Catholic Educational family, will generally been missed by his fans, students and the Christian family of Buea Diocese.

**By Ernest Ekema, Barbara Epey, Minerva Molinge & Njamilatou Tontang (UB Journalism Students on Internship)**

<https://cameroonpostline.com/fr-sobs-killers-are-amongst-us-bishop-bushu-shocked-mourners/%E2%80%8B>

1. [**Bakweri Town Summary Executions: Eyewitnesses Narrate Massacre Of Youths By Military**](https://cameroonpostline.com/bakweri-town-summary-executions-eyewitnesses-narrate-massacre-of-youths-by-military/%E2%80%8B)

 AUG 14, 2018

**By Andrew Nsoseka& Derrick Wambo Woteva**

*The people of Bakweri Town, Sandpit area in Buea, on Monday, July 30, experienced one of their greatest horrors in memory, when masked elements of the Rapid Intervention Battalion (BIR) moved into Bakweri Town and massacred youths, took some away and executed them in neighbouring Muea, leaving communities behind wailing and mourning their children and friends.*

*Following the incident, a team from The Post set out tovisit the scene of the killings andget the details from those who witnessed what they described as summary executions.*

*Most of those who witnessed the killings, sought for anonymity, scared of being identified with the story, for fear of being subsequent targets.*

***Account Of A Close Friend***

One of those who was with the victims, minutes before the soldiers swooped in narrates: “At about 1:45pm on Monday, we stood around the road, nine of us, discussing. One of my friends made a call, and someone was to send him money via mobile money and my phone was used for the transaction. We separated.

I went into my house and he crossed the road moving down to where the BIR later came. About five minutes later, those who were still outside called me and I came out. After about five minutes, two BIR Hilux vehicles arrived and branched off at the Executive Hotel Junction. The first BIR vehicle carried BIR soldiers all in black attire.

The second vehicle came with soldiers in their normal BIR attire with inscriptions on it. They got into the quarters and we had no idea of where they were going to or what they were going to do. About 10 minutes later, we heard gunshots coming from the direction where some of our friends were, at LalaWotoye. Everyone who heard the shots ran into their houses. We didn’t know what was happening.

Some of us thought the soldiers were firing into the air to scare people. After about 15 minutes of sustained gunshots, the guns went silent.Peoplethen came out of their homes. I also came out and we stood by the road, confused about what was going on.The very BIR pick-up trucks came out of the quarters. They drove down towards Sandpit, although they came in from a different direction.

As they drove past us, we heard cries from the direction they were coming from. They had shot some boys who were caught
smoking. We rushed to the scene and upon reaching there; we saw those who were killed.One of them was my younger brother here in the quarter. He is not an Amba fighter. They are not Amba boys.

All they did was smoke. And when you listen to the radio and watch these journalists who have not even come to the scene, you hear them saying, “Amba boys have been killed.” All lies. Let the truth be told, innocent people were massacred.” This account was corroborated by many other eyewitnesses.

Another eyewitness narrates how a corpse was later taken away: “Mayor Ekema came in after we had carried the dead bodies from the gutter where they were killed, up to the road, the T-shirt I wore is completely stained with blood. Thank God we got there earlier and even took pictures of the corpse else they would have displayed guns on them and then claimed that they were armed, whereas they had nothing, not even sticks.

“I recognised two military officers there, one called Joel, and the Company Commander of the Brigade here in Buea. There was a small captain there, he is of the 21st Motorised Battalion, and he had his own crew. They came here. They all cocked their guns, the Mayor holding his own gun, said he is giving us five minutes to bring the corpses outside.

About three boys from the crowd asked him who he expects to remove the corpses and hand to them, and where they are taking the corpses to. The Mayor lifted his gun and trained it on us – a people he calls his own. Finally, they carried the corpses away.

**Former Quarter-head Who Witnessed Shooting Scene**

*At the area where the boys were surrounded and shot dead, we met an elderly man who has lived there since the 80s and also served for seven years as the Quarter-head.*

*He said the area, under a mango tree, opposite his residence, where the boys were massacredis a smoking joint where many of the youths, about 30 of them, usually come to smoke. He said, sometimes, “even the military officers come there and smoke and we all see them”.*

*“I have advised them like an elder to stop smoking, but they usually come there, it is not new.”
Asked what he witnessed on that fateful day, Mola Sam narrated: “I stood outside here, in front of my house, discussing with one of my neighbours who is a Lecturer at the National Advance School of Public Works in Buea. We were discussing what is going on, this Chiefs matter,all of a sudden, we heard: ‘gham, kakakakakaka!’ deafening gunshots, just in front of us.*

*My neighbour, a man, ran down and even missed the road to his house. He just went down straight, instead of crossing the bridge and going to his house. He was confused. I also ran into my house and locked the door with my family and all of us were lying down on the floor because bullets were flying all over. Some of the bullets landed in my kitchen. I told my children to all lie down, and that nobody should stand, because, a stray bullet could hit anyone.*

*They fired continuously for about five minutes, held their fire and then continued again. We stayed in the house for more than 30 minutes until we heard cries outside, when people started gathering. That was when I came out. I thought they were shooting in the air, because about two weeks ago, the military came here, shot in the air and left. I was surprised that they were actually shooting people in that manner. The boys came here to smoke like they do, but should you kill someone for smoking?”*

*“I have not been able to sleep since it happened. When it happened, I was not too shaken, but now, the trauma is setting in, the gunshots and those boys who were killed, is what comes into my mind early in the morning, and even most of the times,” he narrated.*

*Asked whether there is a camp of ‘Amba boys’ around as purported by the present Quarter-head, popularlyknown as Tonga, a retired warder who said the killed boys were in a ‘camp’ and wearing ninja clothing, Mola Samuel dismissed the allegation, saying the Quarter-head has not even been to the scene since the killings took place.*

*He said the smoking joint has been there for a very long time, and sarcastically asked what camp could be under a tree with only sitting stones and with people around not even holding a single machete or knife.*

*One of the neighbours, a woman living across the smoking joint, where the massacre took place, who witnessed the shooting,told her own story. When we knocked at her door, she was shivering and said she was suffering from a serious fever that was hyped after the continuous and frightful gunshots she heard, and the dead bodies that were pulled from beside her house.*

*Asked whether those killed had been carrying out any suspicious activity, she replied: “No, I know that they are always there, smoking. I have lived here for three years and they have never harassed me or anybody I know.*

*They just came and killed them there, some escaped, because, when the military shot some of their friends, the remaining ones, came out and surrendered, some carrying their hands on their heads. Then, the military started shooting those who had carried their hands on their heads as a sign of surrender, and, at that moment, they all started running away in different directions. Some of them succeeded in escaping. Some escaped with bullets in their bodies.”*

***Killing Of Survivors***

*Two of the boys who survived the killings and were captured alive by the BIR were later found shot and dumped in a trash can in Muea. When the family went to take the corpse, they were pushed back by the military. At the scene, we saw caps, shoes and even dresses that were taken off from the bodies of those who were carried alive and blindfolded, only to be shot and dumped in a trash can in another area, Muea. [Muea is about 10 kilometres from Bakweri Town].*

*Asked the reason for carrying the survivors just to execute them somewhere else, a military source said: “After the Menka incident in Santa in the Northwest, all military units have been advised not to shoot and leave above five corpses in a single spot.*

*So, I guess that is why that unit had to blindfold those boys and then shoot them somewhere else. The Menka incident tarnished the image of the Government and military, and to keep the international community from asking questions, they no longer kill and leave more than five corpses in a single place. They carry other bodies to different areas and dump them.”*

***Good Soldier In Killer Squad***

A story is also told of one of the BIR officers who tried to save lives, by first opening fire by only shooting in the air to alert the boys and give them room to escape. One of the survivors narrate that when he bumped into the officer in the course of escaping, the officer held up his gun to his [survivor’s] face, the survivor said he made peace, held the officer’s gun that was already pointed into his mouth and told the officer that he was ready and that he could go on and shoot.

The officer then pushed the boy aside, showed him which direction to run to, and then continued firing in the air. Friends of the survivor said he ran home, visibly shaken, and traumatised and that at that time, he behaved as though he had gone mental.

So far, as at press time, no Government official had made any statement on the killings.

<https://cameroonpostline.com/bakweri-town-summary-executions-eyewitnesses-narrate-massacre-of-youths-by-military/%E2%80%8B>

1. [**Biya’s Secret Envoys Tell US, UN: Separatists Are Attacking Unarmed Civilians, Troops**](https://cameroonpostline.com/biyas-secret-envoys-tell-us-un-separatists-are-attacking-unarmed-civilians-troops/%E2%80%8B)

 AUG 9, 2018

**By Bouddih Adams**

*President Paul Biya*

*A delegation of members of Government sent abroad on an offensive to counter Ambazonia claims that have exposed and sullied the image of the Government of Cameroon, especially its military, has submitted its report, which The Post procured.*

*The mission was charged with: meeting the UN Secretary General, Antonio Gutteres, Permanent Representatives of member countries of the UN Security Council, Non-Permanent Members of the Security Council, the US Government and Legislators (Senators and Congressmen), Non Governmental Organisations among others.*

*The mission was assigned to give Cameroon’s version of the situation in the country; brief them on the exact situation on the field; arrange for some diasporans to work with the Government, form pressure groups in Washington and New York, et cetera.*

*It comprised Dr. Joseph Dion Ngute, Minister in charge of Missions at the Presidency; Paul Ghogomu Mingo, Director of the Prime Minister’s Cabinet; Felix Mbayu, Minister Delegate to Ministry of External Relations (MINREX) in charge of the Commonwealth; Oumarou Chinmoun, Director of American and Caribbean Affairs at the MINREX; and Susan Eyema Elinge epse Ewusi, Research Officer at the Presidency.*

*Resource Documents were: talking points on the special mission to the USA; briefing notes on the situation in the Northwest and Southwest Regions; Government’s response to the 2017 State Department’s report on the situation of Human Rights in Cameroon; comments on the written statement by Felix Agbor Nkongho to the US House of Representatives Committee on Foreign Affairs, by Prof. Victor Julius Ngoh; Government emergency humanitarian assistance plan in the Northwest and Southwest Regions 2018 – 2019; 2016 Report on the situation of Human Rights in Cameroon by the Ministry of Justice; compilation of the actions carried out by Government since the onset of the crisis in the Northwest and Southwest Regions; Compendium of US Government Reports, by Squire Patton Boggs Firm; Cameroon Government’s response to the Amnesty International report titled “Cameroon: credible evidence that army personnel responsible for shocking extrajudicial executions caught on video.”*

*The mission, in its report, stated that, at each audience, it briefed its hosts on: the evolution of the socio-political situation of the country; the atrocities committed by the secessionists on the civilian populations, government officials, traditional rulers and security forces; the violence perpetrated on public edifices and infrastructure as well as on private property.*

*It stated that it was helped in the organisation of audiences by the Cameroon Permanent Representative to the United Nations, Tommo Monthe.*

*The mission presented in the reports as remarks and recommendations: “Maintain a direct link between our Government and the UN by constant high-level missions; adopt and adapt an aggressive communication strategy, especially with the Anglo-Saxon press; get our Permanent Mission all documentation to distribute on a permanent basis.”*

*Noting that: “We feel that the US Government is better informed now,” following the mission abroad, the delegation gave as recommendations: “Reinforce our relations with some influential members of the Congress; Promote productive cooperation with the USA [such information missions should be multiplied; Our partners of Squire Patton Boggs should be more proactive; The Ambassador should be more present at the US Congress; We should send to them up-to-date information.”*

*They stated that at the end of the mission, following instructions from the Secretary General at the Presidency of the Republic: “We invited Dr. Ekema, retired from the Pennsylvania State University, to start working on creating a coalition of Cameroonians of the Diaspora who are ready to engage in positive and productive relationships with the American authorities, especially on pertinent issues concerning Cameroon.”*

<https://cameroonpostline.com/biyas-secret-envoys-tell-us-un-separatists-are-attacking-unarmed-civilians-troops/%E2%80%8B>

1. [**Fon Mukete’s Palace Attacked, Royal Artefacts Looted**](https://cameroonpostline.com/fon-muketes-palace-attacked-royal-artefacts-looted/%E2%80%8B)

 AUG 9, 2018

**By Maxcel Fokwen**

*Nfon Mukete
The Kombone Bafaw Palace of Cameroon’s eldest Senator, Nfon V.E Mukete, in Konye Sub-division, Southwest Region has been attacked by unknown men and some royal properties reportedly looted in the process.*

*The incident unfolded in the night of Wednesday, August 1, breaking Thursday, August 2.*

*A source in Konye Sub-division, confirmed to The Post that the gunmen stormed the Palace, shattering the windows and making away with valuable material.*

*Our source said the gunmen are suspected to be members of the separatists’ Ambazonia Defence Forces.
The Kombone Bafaw Palace of the revered traditional ruler and Statesman is often used for occasional purposes when Mukete sojourns to Konye Sub-division.*

*It is undoubtedly the most expensive house existing in the village located along the Kumba-Mamfe Road axis.
A few years back, Kombone Bafaw received a facelift as it hosted the annual cultural festival of the Bafaw tribe tagged ‘Mbum Bafaw’.*

*However, the main Palace of the Paramount Ruler of the Bafaw tribe is found in Kumba.*

*The attack on the palace is not the first in the Northwest and Southwest Regions, since the current social pressures assumed a deadly posture.*

*Across Konye Sub-division, most traditional rulers have escaped their villages citing threats to life. The first arson on palaces was recorded in Etam, Tombel Sub-division.*

*Gunmen attacked the locality early this year setting it ablaze and brandishing a coffin.*

*Months after, similar attacks on secret traditional establishments were recorded in Nguti and across Lebialem Division .As at press time; attempts to get reaction from the Kumba Palace on the incident were unsuccessful.*

<https://cameroonpostline.com/fon-muketes-palace-attacked-royal-artefacts-looted/%E2%80%8B>

1. [**Minister Tells Freed Fako Chiefs: Lure Your Subjects Out Of Bushes**](https://cameroonpostline.com/minister-tells-freed-fako-chiefs-lure-your-subjects-out-of-bushes/%E2%80%8B)

 AUG 9, 2018

**By Nformi Sonde Kinsai**

*The Minister of Territorial Administration, Paul Atanga Nji, has tasked recently freed Fako Chiefs to lure their subjects out of the bushes.*

*This was during a reception of four out of the seven freed Fako Chiefs in Yaounde on August 3. Minister Atanga Nji instructed them: “while back in your communities, ask the young people to come out of the bushes.”*

*The Chiefs received included: Johnson Njoke of Wokaka village; Philip Ikome of Wokeka; Thomas Elinge Ndotoh of Ewili and Herman Njombi of Wokwai.*

*A Councillor of the Buea Council, Edward Wokama Ngangue, who was also abducted and later freed, was also part of the delegation that was headed by Mayor Patrick Ekema.*

*Expressing the compassion of the Head of State to the Chiefs, Atanga Nji said President Paul Biya was very touched upon hearing of their kidnapping.*

*“Cameroon is a peaceful country and the President, since 1982, has been working tirelessly to ensure that peace is maintained. But unfortunately, the situation in the Northwest and Southwest Regions is now threatening that peace,” he stated.*

*He thanked and described the Mayor of Buea as “a courageous and an example of a patriotic citizen. Cameroon needs more courageous people like the Mayor in these challenging times,” Atanga Nji noted.*

*He told the Chiefs that as custodians of tradition and President Biya being the Fon of Fons, he (Biya) is supportive of them to guarantee the protection of tradition.*

*According to him, President Biya keenly listened to the demands of the lawyers and the teachers and has thus made tremendous efforts in resolving them.*

*He argued that Biya has given to the Anglophones more than what they expected, pointing to the recent cabinet reshuffle which, according to him, saw Anglophones occupying key positions.*

*“Nothing can justify the terrorism occurring in the country. Government rejects violence in its totality. Cameroon is a State of law and the rule of law must be respected.*

*Statistics show that terrorists have raped 1,280 girls between the ages of 11 and 14…People cannot be asking for development and at the same time burning down public and private properties,” he thundered.*

*He said Government is ready to discuss, but only within the ambit of the institutional reforms of the State.*

*Speaking on behalf of the Chiefs who, The Post gathered were advised not to make any public declarations, Patrick Ekema, told reporters that the rising insecurity in the municipality must end for Buea to regain its status of legendary hospitality.*

*He said following the release of the Chiefs, they were negotiating the last bend.*

*He talked of how the Council stood its grounds to ensure that there was school resumption despite the distortion that was orchestrated by the lawyers’ and teachers’ strikes.*

*He said extra catch up lessons in the form of holiday classes were organised with some 7000 pupils and students attending.*

*Ekema said in the face of such efforts, “Presbyterian and Catholic school Proprietors unanimously decided to side with the ‘terrorists’ to enforce non-resumption of schools. And of course, we stood our grounds and addressed a memo to the Head of State indicating the role of the clergy in the non-resumption of classes,” he disclosed.*

*He recalled that at the beginning of the school year, some parents got angry and took the PCC Moderator and the Archbishop to court.*

*“Somewhere along the line, there was a lot of pressure, they succumbed and opened the doors of their schools.*

*“That notwithstanding, we have been of course ensuring that we animate the city with life. One of the primordial roles of a Council in our country is to ensure the social welfare of our people. Being a Mayor, I could not be indifferent. I have been pushing this course to the latter.*

*“What triggered the last move was the abduction of traditional rulers in my municipality and I could not stay silent. I issued an ultimatum and we are happy it was respected, reason why we are having the chiefs here. I am not going to end at this. We have a wide and an elaborate plan. You heard me say we are negotiating the last bend and I am sure we are going to certainly have a good time to negotiate that last bend,” Ekema stated.*

*Wokama Testifies
Meanwhile, Wokama who exhibited wounds resulting from torture said he was kidnapped alone while on his way back from the farm.*

*He narrated that he was accused of being an informant to the Buea Mayor and was thus tortured for 11 hours. He said all plead of his innocence fell on hard rock as he eventually gave a bag of rice.*

*He stated that those who kidnapped him were not mask but unfortunately, he cannot recognise them. He noted that he was set free only when the abductors discovered that his situation was getting very bad as he bled profusely.*

*The Ekema-led delegation of Chiefs and the Councillor were thereafter received in audience that same day by the Prime Minister, Philemon Yang.*

<https://cameroonpostline.com/minister-tells-freed-fako-chiefs-lure-your-subjects-out-of-bushes/%E2%80%8B>

1. [**Cardinal Tumi, Other Clerics Convene Stormy AAC III**](https://cameroonpostline.com/cardinal-tumi-other-clerics-convene-stormy-aac-iii/%E2%80%8B)

 JUL 26, 2018

Photo by Benjamin Zotter reprinted with permission**Conference To Seek Lasting Solution To Anglophone Crisis**

**Give 2 Tough Conditions For Participation**

**Appeal To Restoration Forces To Down Arms**

**Tells Gov’t To End Military Hostilities, Bring Back Fleeing Population**

**By Nformi Sonde Kinsai & Sylvester Atemnkeng**

Archbishop Emeritus of Douala Archdiocese, His Eminence Christian Cardinal Tumi; the Synod Clerk of the Presbyterian Church in Cameroon, PCC, Rev. George Babila Fochang, the Imam of the Bamenda Central Mosque, Tukur Mohammed Adamu and the Chief Imam of the Buea Central Mosque, Alhadji Mohammed Aboubakar; have convened an Anglophone General Conference for August 29 and 30 in Buea.

The information is contained in an announcement signed by the above servants of God after a meeting in Douala on July 25 on the invitation of Cardinal Tumi.

The objective of the conference, it is stated, is to promote peace in Cameroon. Below is the full content of the announcement.

“In the name of the Almighty God, the Father and Creator of all of us, we His undersigned servants, met today, July 25, 2018, in Douala at the invitation of His Eminence Christian Cardinal Tumi, to reflect and pray over the political, social, economic and security situation prevailing in Anglophone Cameroon (Northwest and Southwest Regions).

“As we all know, the people of these two regions have suffered enough hardship in the nearly two years since the present crisis erupted in October 2016. We believe that the moment has come to put an end to the conflict through a frank, inclusive and comprehensive national dialogue on the Anglophone Problem. We therefore, fervently appeal to the President of the Republic, Head of State, to organise such a dialogue as soon as possible.

“We recognise that absolute necessity for the people of the Southwest and Northwest Regions to hold a preparatory general conference in order to agree on the issues to be examined at the national dialogue on the Anglophone Problem and to freely designate their representatives at that dialogue.

“Accepting our moral responsibility to promote peace and harmony among all God’s children, we hereby freely take the initiative to constitute ourselves into a college of conveners for the purpose of summoning the required General Conference of the people of the Southwest and Northwest Regions. To this end, we hereby convene an Anglophone General Conference (AGC) to be held in Buea on Wednesday 29 and Thursday 30, August 2018.

“The Anglophone General Conference will be organised by a broad-based conference organising committee comprising representatives of traditional and religious authorities, civil society leaders, professional associations, women and youth groups, trade union organisations, etc. Participation in the conference will be open, and limited to all Cameroonian citizens living in Cameroon or abroad who fall in one of the following two categories:

i) Those whose ancestral origins are within one of the 13 Divisions of the territory that today constitute the Northwest and Southwest Regions of Cameroon; or

ii) Those whose parents or grandparents, not having their ancestral origins in one of the 13 Divisions of the Southwest and Northwest Regions, settled permanently in this territory as at 1st October 1961.

“The Governors of the Northwest and Southwest Regions shall be invited to attend the Anglophone General Conference in person or through their designated representatives.

“We hereby designate Dr. Simon Munzu, a well-known Civil Society personality and the Assistant Secretary General of the United Nations, as spokesperson, Adviser to the Conveners and Coordinator of the Conference Organising Committee.

“We call upon the Government of Cameroon and the various armed groups that now operate throughout the territory of the Northwest and Southwest Regions, to declare an immediate end to military hostilities in these two regions and thus create favourable conditions for finding a peaceful and lasting solution to the Anglophone Problem and to ending the Anglophone Crisis in our country through dialogue.

“We pray the Government of Cameroon to create favourable conditions for the participation of all qualified individuals in the Anglophone General Conference by discontinuing all criminal proceedings and ordering the release of all persons currently detained in connection with the Anglophone Crisis as well as facilitating the return of persons who have been internally or externally displaced as a result of the Anglophone Crisis since October 2016, including those on exile and refugees.

“We call upon all the people of the Northwest and Southwest Regions living at home and abroad to make the sacrifices necessary, even in these difficult circumstances, to attend the Anglophone General Conference massively, and thus contribute directly to collectively search for a final, lasting and satisfactory solution to the Anglophone Problem and Anglophone Crisis in Cameroon.

“We request public authorities at local, sub-divisional, divisional, regional and national levels as well as the friends of Cameroon in the international community to support our initiative and thus contribute to the success of the Anglophone General Conference as a necessary first step towards a national dialogue on the Anglophone Problem.
“Finally, we urge all Cameroonians to continue to pray for peace and harmony in our land.”
Done in Douala this 25th Day of July, 2018.

**Signed:**

**His Eminence Christian Cardinal Tumi;**

**Rev. Babila George Fochang – Synod Clerk, Presbyterian Church in Cameroon;**

**Imam Tukur Mohammed Adamu – Bamenda Central Mosque, Northwest Region;**

**Imam Alhadji Mohammed Aboubakar – Chief Imam, Central Mosque, Buea, Southwest Region.**

<https://cameroonpostline.com/cardinal-tumi-other-clerics-convene-stormy-aac-iii/%E2%80%8B>

1. [**Amba Boys Cleanse Image**](https://cameroonpostline.com/amba-boys-cleanse-image/%E2%80%8B)

 JUL 11, 2018

**By Basil K Mbuye**

*Separatist forces commonly known as the “Amba Boys” have reportedly embarked on a mission around the Buea Municipality trying to cleanse their reputation which they say has been tarnished by some impostors claiming to be Amba Boys and extorting money from the public.*

*The Separatist forces have reportedly been visiting some localities in the municipality on supposed mission which they allege is to cleanse their reputation which they say has been tarnished by some rogues who have been posing as the Separatist forces.*

*On Tuesday, July 3, in Mile 16, the Amba Boys caught close to 25 impostors who have been terrorising the neighbourhood and giving them a bad name in front of the public. The 25 impostors were given the beatings of their life in front of the population.*

*The impostors had been reportedly going around tying red pieces of cloth on their hands and heads and also extorting money from the population in the name of being Amba Boys. The leader of the impostors succeeded to escape the wrath of the Amba Boys as his other members faced the music.*

*In Muea, some individuals allegedly went around as Amba Boys asking the population to give money to support the struggle. Unfortunately for them, the news got to the Amba Boys who had to react in order to cleanse their image.*

*An impostor whose name we got as Franklin aka Agogo was caught around the Catholic Church in Muea and given the beating of his life by the Amba Boys, for extorting money from the public.*

*Still in Muea, another impostor’s three fingers were reportedly chopped off by the Amba Boys around Black Field in Muea. In Bokwango, an impostor was caught while moving from house to house in the neighbourhood asking the people for money in the name of supporting the struggle.*

*According to observers, these impostors have been going around extorting money from the public and also giving fake threats. The impostors are said to receive money directly from the population with their hands, unlike the Amba Boys who always ask money offered them to be put on the ground before they pick it.*

<https://cameroonpostline.com/amba-boys-cleanse-image/%E2%80%8B>

1. [**Killings, Vote Buying Mar Regional Elections In NW**](https://cameroonpostline.com/killings-vote-buying-mar-regional-elections-in-nw/%E2%80%8B)

 DEC 6, 2020  [elections](https://cameroonpostline.com/tag/elections)

By Chris Mbunwe
The maiden Regional Elections to vote representatives into the Regional Councils and the House of Chiefs on Sunday, December 6, was characterised by allegations of vote buying, killings and bickering especially in the Northwest and Southwest Regions.
In the early hours of Sunday in Mezam Division of the Northwest Region, a Catholic Priest of the Bamenda Archdiocese, Rev. Fr. Anthony Viban, was attacked, alongside a Seminarian, while on their way to celebrate Holy Mass with their Christians.
The Priest and the Seminarian were reportedly attacked in Akum on the outskirt of Bamenda by gunmen. The hoodlums are said to have opened fire on the Man of God shattering his car and injuring both the Priest and the Seminarian on the leg and hand.
The victims of the gun attack were reportedly rushed to the hospital where they are receiving medical attention.
In Ngoketunjia Division of the Northwest Region, correspondent reports hold that the election, especially that into the House of Chiefs was marred by vote buying and influence peddling.
Before the polls, Ngoketunjia Division had resisted presenting a consensus list into the House of Chiefs as two of her Fons: Fon Zofoa Abubaka of Babungo and Fon Kevin Shumentang of Bambalang were eyeing a place into the House of Chiefs.
Our sources in Ngoketunjia Division said the acrimony was not only among the traditional rulers, but that some Councillors from Babessi were caged in a hotel, their phones seized on the eve of the elections and they were offered mouth-watering sums of money ranging from FCFA 20,000 to FCFA 300,000 per Councillors in exchange for their votes.
In Momo Division, the pioneer Regional elections turned bloody when one of the Councillors of Echo Council in Widikum, was shot dead.
The Councillor, who is also a retired Custom Officer was in a convoy alongside his colleagues and were being ferried to the Divisional capital Mbengwi to vote when their convoy came under attack from gunmen.
The Post learnt that the mortal remains of the Councillor were deposited at the Mbengwi mortuary, while his bag was abandoned in the polling centre where he voted.
Nso Fon Resurfaces In Polling Centre
Meanwhile, many people in Bui Divisional headquarters, Kumbo were stunned when the Paramount Ruler of Nso, Sehm Mbinglo, resurfaced at Government Bilingual High School, GBHS, Kumbo to cast his vote.
The Paramount Ruler of the Nso people was recently kidnapped alongside the Archbishop Emeritus of Douala, His Eminence Christian Cardinal Tumi, en route to Kumbo.
The Fon was later released and advised to renounce partisan politics before returning to his people.
However, the Fon was reportedly escorted to Bui on the eve of elections under heighten security.
In other Divisions like Mezam, Menchum, Boyo and Donga-Mantung, even though the population respected the imposed ghost towns, the Councillors and traditional rulers who constituted the Electoral College were escorted to the polling stations by the forces of law and order, where they cast their votes. The Regional Elections may have come and gone, but the onus now rest on the shoulders of those who have been voted to transmit this highly mediatised elections into concrete actions, else it may turn out to be a high-sounding nothing.

<https://cameroonpostline.com/killings-vote-buying-mar-regional-elections-in-nw/%E2%80%8B>

1. [**Lawyers Call For Nationwide Strike Nov. 30 – Dec. 4**](https://cameroonpostline.com/lawyers-call-for-nationwide-strike-nov-30-dec-4/%E2%80%8B)

 NOV 25, 2020

**By Etienne Mainimo Mengnjo**

Lawyers in Cameroon, under the Cameroon Bar Association, will on November 30 to December 4 carried out a nationwide strike.

The strike action is one of the resolutions taken during an Extra-Ordinary Bar Council Session held on November 13. The Extra-Ordinary Bar Council Session was held on the heels of police brutality on lawyers on November 10 in Douala at the Bananjo Magistrates Court.

Going by the three-page document, signed by the acting Bar Council President, Barrister Claire Atangana Bikouna and the Bar Secretary-General, Barrister Phillipe Olivier Memong: “Members present unanimously call for a nationwide strike from November 30 to December 4, 2020, during which no lawyer shall attend court,” article two of the resolution stated.

Article three stated that members present suspend, until further notice, the appearance of lawyers on criminal matters in all the courts throughout the national territory, including the Supreme Court and the Special Criminal Court.

The appearances of lawyers in all courts dealing with electoral disputes, including the Constitutional Council, are also suspended after the nationwide strike action referred to in Article 2 above.

Meanwhile, judicial honours for the late Bar President, Barrister Charles Patie Tchakoute, initially slated to take place at the Court of Appeal of the Littoral Region, Douala, and the Supreme Court in Yaounde, has been cancelled.

According to the Bar Council, the said judicial honours shall take place in a different location, more accommodating to lawyers, which will be communicated later.

In the meantime, lawyers have been urged to, more than ever before, be calm, cautions and vigilant in order to avoid provocation and violent confrontation at the risk of falling into the multiple snares designed to weaken the Bar, particularly at this difficult moment when they have lost and preparing to bury the late Bar President.

The Bar Council, besides ensuing measures and without prejudice to any other subsequent measures to be taken, including the convening of a protest Extra-Ordinary General Assembly and, until an end, push for the release of all lawyers in detention, on the one hand, and in a bid to revamp the tarnished image of the profession, on the other hand.

Going by a statement from the Bar Association, two Douala-based lawyers, Barristers Richard Tristel Tamfu Ngarka and Armel Kemmegne Tchuemengne, eyewitnesses of the brutality that went on in Bonanjo Douala, were arrested and detained.

They are said to have been, without prior summons, or warrants, waylaid and apprehended by elements of the judicial police of the Littoral Region and charged with insulting a Magistrate, destruction and commenting on a matter, which is sub judis.

The lawyers were detained from November 18 to 20 and later remanded in custody by the State Council of the said court. They are to be tried under the flagrante delicto procedure on Monday, November 23.

<https://cameroonpostline.com/lawyers-call-for-nationwide-strike-nov-30-dec-4/%E2%80%8B>

1. [**Upcoming Regional Elections: Musonge Challenges SW Councillors To ‘Vote Massively**](https://cameroonpostline.com/upcoming-regional-elections-musonge-challenges-sw-councillors-to-vote-massively/%E2%80%8B)

 NOV 25, 2020  [Northwest](https://cameroonpostline.com/tag/northwest), [Politics; Southwest](https://cameroonpostline.com/tag/politics-southwest), [Regional Elections](https://cameroonpostline.com/tag/regional-elections)

**By Hope Nda**

The Southwest Regional Campaign Manager of the Cameroon People’s Democratic Movement, Peter Mafany Musonge, has challenged CPDM Councillors to vote massively in the forthcoming Regional Elections.

He was speaking in Buea, Saturday, November 21, while launching campaigns for the Regional polls.

“We are going to have the Regional Assembly and a House of Chiefs, which are important aspects of the Special Status, and so they should help us realise it by voting massively on that day,” Musonge said.

The campaigns will be taking place amid widespread violence in the Northwest and Southwest Regions.

At the Buea Independence Square where the Regional campaigns were launched, scores of CPDM militants were enthusiastic and seemed undisturbed about any possible security challenges during the elections.

According to the Mayor of Buea, David Mafany Namange, the Municipality is prepared for campaigns and CPDM Councillors in the municipality should support the CPDM Central Committee by voting massively.

He said the launching ceremony has “fortified” militants for the upcoming political challenges.

The first Regional Elections may, however, not be very challenging for the ruling CPDM, especially as the two main opposition; the Social Democratic Front, SDF, and the Cameroon Renaissance Movement, CRM, parties are boycotting the elections.

This will enable the party to claim the remaining Councils, especially in the Northwest Region (where the SDF party is most powerful).

The CPDM claimed more than 60 per cent of Municipal seats nationwide in the Municipal and Legislative Elections, winning all councils in eight divisions of the Centre Region and 32 Councils out of 33 in the East Region.

Since 1992 Presidential Elections, the opposition has often accused the ruling CPDM of rigging most elections, including 2018 Presidential Elections, to keep long-serving President, Paul Biya in power.

In January 2019, CRM party leader, Maurice Kamto, launched a nationwide protest against results of the 2018 elections which he claimed was rigged in favour of the CPDM.

Many political actors in the country are questing for more decentralisation of power and that local authorities should be able to take decisions for their people and not follow long protocols.

This is the case of the Northwest and Southwest Regions where the quest for more autonomy has plunged the Regions into a four years crisis.

The Regional Elections is an outcome of a 2019 Major National Dialogue that was meant to discuss the crisis in the Northwest and Southwest regions.

Government says Regional Councils will ensure more decentralisation and will help each Region to deliberate and manage its own developmental affairs.

However, appointed Regional Governors will remain in place and will supervise activities of the elected Regional Councillors, said Isaac Mbua Embole of the Ministry of Decentralisation and Local Affairs.

“We are in the last phase of decentralisation of the process and the election of December 6 is the highlight of the process,” Musonge said.

**Traditional Rulers & The Regional Elections**

The December 6 Regional Elections will revived the once abolished House of Chiefs in the Anglophone Regions, but this time it will not be an independent house as it was in the 1970s.

But the autonomy commanded by the historical Southern Cameroons House of Chiefs, which was later dissolved, will be far-fetched in the upcoming HOCs, who will be an integral part of the Regional Council supervised by the Regional Governors.

The House of Chiefs is given only to the English-speaking Regions, and will be absent for the other eight Regions of the country.

20 Chiefs will be voted by their fellow traditional rulers and they will work with a 70-member Regional Assembly under the Governor’s supervision.

Although many traditional rulers of the English-speaking Regions are out of their palaces due to the crisis, some of them are optimistic and will contests for the elections into the House of Chiefs, and are hoping to give their populations their ‘best’.

In Fako Division, Chief Richard Ndike, Paramount ruler of Mondoni, is contesting the elections alongside Chief Emmanuel Etina Monono and Chief David Nanyowe.

“The Chiefs are readily prepared for it. The population should expect from us the contribution to ensure that the economics of this Region changes the position where we are. We want to assure them that what we have at our disposal we shall give them the best of it,” said Chief Richard Ndike to the press.

The traditional rulers, alongside the Regional Assembly of 70 Municipal Councillors will oversee issues of education, vocational training, youth empowerment culture, etc, of the regions.

They will also be consulted when policies are being defined concerning Anglo-Saxon educational system.

The House of Chiefs will be instrumental in deciding the status of traditional Chiefdoms – whether they are first, second or third class Chiefdoms.

<https://cameroonpostline.com/upcoming-regional-elections-musonge-challenges-sw-councillors-to-vote-massively/%E2%80%8B>

1. [**Suspected Separatist Apologist Disappears, Family Inconsolable**](https://cameroonpostline.com/suspected-separatist-apologist-disappears-family-inconsolable/%E2%80%8B)

 JUN 14, 2010

**By Danjuma Bonki**

Friends and family members of Cyril Ayuk Taku, a denizen of Tiko, a precinct in Fako Division, Southwest Region of Cameroon, remain inconsolable, following his unprecedented disappearance since June 2008.

Family sources say Cyril has allegedly been on the radar of the Cameroon Military amidst suspicion of being part of an activist group, the Southern Cameroons National Council, a group advocating for the secession of Anglophones from the Republic of Cameroon.

“Before Cyril’s disappearance, he always told us he was being tracked by the military. He even narrated an incident where he was closely followed and monitored while he returned from work. He said the plain clothe men suspected to be agents of the Cameroon military, would move around his vicinity, somewhat checking on his activities. We are very confused if he was finally arrested or he ran for safety somewhere,” a closed family member who pleaded for anonymity, told this reporter.

Another family member indicated that they opened up a manhunt for the missing brother, all to no avail to ascertain his whereabouts.

“Since June, we have gone to all detention facilities in Tiko, Limbe, and Buea. We even sent relatives to Yaounde where another search was carried out, all to no avail. We also placed announcements on radio, newspapers, and on TV. Unfortunately, we still did not see anything,” Mr. Tiku Manfred, a relative said.

In 2009, Cyril’s father, Mr. Tiku Joseph Taku (now of late), waged a vibrant campaign for the liberation of British Southern Cameroons (Northwest and Southwest Regions), from La Republique du Cameroun. The campaign was done under the tutelage of Southern Cameroons National Council (SCNC), which was highly animated abroad amidst diaspora involvement, was nonetheless was nonetheless short-lived due to the unprecedented passing away of Pa Tiku under unclear circumstances earlier this year.

The activities of Cyril’s father many indicated, greatly put the lives of the family in harm’s way as there have been security checks on members of the family since then. Being a young man, Cyril was even more victimised giving his possibly association with secessionist tendencies.

<https://cameroonpostline.com/suspected-separatist-apologist-disappears-family-inconsolable/%E2%80%8B>

1. [**Sisiku Ayuk Tabe Tells Biya: Revisit October 1 Celebration Videos To Know Whom To Dialogue With**](https://cameroonpostline.com/sisiku-ayuk-tabe-tells-biya-revisit-october-1-celebration-videos-to-know-whom-to-dialogue-with/%E2%80%8B)

 OCT 3, 2019

Sissiku Ayuk Tabe and wife

The incarcerated Interim Government leader of Ambazonia, Sisiku Julius Ayuk Tabe, has called on President Paul Biya to closely watch videos of October 1 celebrations from the Northwest and Southwest Regions in order to determine whom to dialogue with.

Speaking to *The Post* at the Kondengui Principal Prison, Sisiku described the recently ended Major National Dialogue that was convened by President Paul Biya as a non-event.

He rhetorically questioned whether delegates to the dialogue from the Southwest and Northwest Regions including the Chairperson and Prime Minister, Chief Dr. Joseph Dion Ngute, can travel to their villages, organise meetings at the village squares and read out the resolutions arrived at to their people.

According to Ayuk Tabe, leadership is all about the people and not the leaders themselves.

He called on all the leaders of the Ambazonia struggle, to drop interpersonal bickering on social media and rather focus on the well-being of the people of the Northwest and Southwest Regions as well as the thousands of refugees in Nigeria and other neighbouring countries.

He narrated what IG Care is doing within its reach to secure a better tomorrow for late baby Matha Mbuh’s parents, and how they engaged their lawyers to follow up and ensure that Paddy Asanga was released.

He added that they had also engaged a team of lawyers to join those of Abdul Karim’s family as well as those of Chris Anu’s mother and sister to see how they could file and demand a habeas corpus for all of them.

“My concern is the lives of the Ambazonian people, irrespective of their political stand as far as the struggle to freedom is concerned. As leaders, we all have to focus on profitable projects. There is the urgent need for the leaders to engage on humanitarian, legal and diplomatic initiatives so as to push forth the cause an inch forward every day,” he stated.

On IG’s relationship with the Ambazonia Governing Council headed by Dr Ayaba Cho, Prof. Awasum simply told ***The Post*** reporters that there was a memorandum of understanding between them especially on the protection of lives and property as he could not respond to further enquiries.

Sisiku Tabe and Prof. Awasum reiterated that only a UN organised meeting with the USA present could be genuine to them.

They suspected the Swiss for being behind Abdul Karim’s arrest; reason they could not trust any other mediator out of the aforementioned.

They praised the US for taking the Ambazonia crisis at heart and challenged the UN to face its responsibility and go back to the 1961 principles and resolutions.

As a demonstration of the concern he has for his people, Sisiku confronted a delegation from the Military Tribunal that was visiting the detention facility that October 10, questioning them on why Ivo Fomusoh and his two friends were still behind bars after six years.

Fomusoh and the friends had jokingly exchanged text messages on Boko Haram ‘recruitment’ that eventually landed them into trouble.

<https://cameroonpostline.com/sisiku-ayuk-tabe-tells-biya-revisit-october-1-celebration-videos-to-know-whom-to-dialogue-with/%E2%80%8B>

1. [**CRM To Intensify National Resistance After Kamto’s Liberation**](https://cameroonpostline.com/crm-to-intensify-national-resistance-after-kamtos-liberation/%E2%80%8B)

 OCT 10, 2019

**By Etienne Mainimo Mengnjo**

The Cameroon Renaissance Movement, CRM, says, since the just ended Major National Dialogue, MND, did not address the thorny issue of the post-election crisis and other issues affecting the life of the nation, the party is obliged to maintain and accentuate national resistance.

The strong worded statement from the CRM party is contained in six-page document made public on October 5 in Yaounde and signed by its National President, Prof. Maurice Kamto. According to the communiqué, the forms and method of resistance will be communicated in the days ahead.

“… The MND did not, at all, address the thorny issue of the post-election crisis. Even our nine months of arbitrary imprisonment will not have been enough to sensitise the ruling power on the need to resolve this issue. In particular, no attention has been paid to the crucial issue of the consensual reform of the electoral system before any new election, an issue on which all political actors in our country, including ELECAM, agree,” the communiqué reads.

The document further states: “It is therefore clear that the electoral hold-up continues and intends to be reinforced. We are, therefore, obliged to maintain and accentuate the National Resistance, in the forms and methods that will be communicated later. As a result, we urge CRM activists and supporters as well as all Cameroonians concerned about the future of our country to remain mobilised.”

Apart from announcing national resistance, the CRM party indicated that the MND seems not to have brought a new and lasting solution to the claims of the Anglophones on the form of the State. At such, a solution can only be reached through direct discussions with political representatives of the armed groups that control the ground, including those who have recently been sentenced to life imprisonment.

“Such a solution is essential before the organisation of the next elections, so as not to open the way to a de facto partition of the country because of insecurity. In this perspective, it is urgent to release all those still detained because of their involvement in the Anglophone Crisis,” partly reads the communiqué.

Talking about the MND, the party asked: “Did we need about 3,000 deaths, more than half a million internally displaced persons, nearly 40,000 refugees, hundreds of villages destroyed, three years of lost schooling and an economic catastrophe to come and reaffirm a Constitution that has long been denied for 23 years?”

Besides discussing the content of the ‘Special Status’ within the framework of the MND with the representatives of the various groups concerned, including the Secessionists, the CRM party indicated that there is no shortcut to a direct dialogue with the Anglophone leaders who have a real grip on the armed groups controlling most of the Northwest and Southwest Regions.

The party says general amnesty for all leaders and all those concerned in the crisis, is essential to create the conditions for a deep and lasting solution. It maintains that there is need for peace to return to the affected Regions, because, if the next elections are held only on one part of the country, it means the country is already divided.

Appreciating Sultan Mbombo Njoya’s proposal, the party also called for the guaranteeing of public freedom and fundamental human rights, independence of the judiciary and the renunciation of the use of justice for political ends.

The CRM party expressed their thanks to all Cameroonians and foreign lawyers who, in an exceptional commitment, brilliantly defended them. The party also thanked CRM leaders and militants at all levels, for their ongoing vigilance and mobilisation, as well as the international community, friendly countries, human rights NGOs and other Civil Society Organisations, for their various statements in favour of a concerted and inclusive settlement of the many crises that are shaking Cameroon as well as their immediate and unconditional release.

Nevertheless, the party pointed out that the announced discontinuance of proceedings does not seem to have settled the situation of all the detained comrades, with a number of them facing long prison terms ruling.

<https://cameroonpostline.com/crm-to-intensify-national-resistance-after-kamtos-liberation/%E2%80%8B>

1. [**Bamenda Bikers Trapped Between Stern Administrators, Rigid Amba Fighters ¬ Impounded New Bikes Allegedly ‘Missing’ In Custody**](https://cameroonpostline.com/bamenda-bikers-trapped-between-stern-administrators-rigid-amba-fighters-%ef%83%98impounded-new-bikes-allegedly-missing-in-custody/%E2%80%8B)

 APR 21, 2020  [Bamenda Biker](https://cameroonpostline.com/tag/bamenda-biker), [Protest in Bamenda](https://cameroonpostline.com/tag/protest-in-bamenda)

**By Kevin Agbor**

Bike riders in Cameroon’s Northwest Region are not having it easy, as they are faced with two uncompromising forces; the Region’s administrators, ordering them to register bikes and paint them with a unique yellow colour, and uncompromising Separatist fighters on the other hand, warning that respecting the administrators will be tantamount to forfeiting one’s bike, because it will be seized and burnt.

Following prescriptions from the Minister of Territorial Administration, Mr Paul Atanga Nji, security operatives have engaged in an aggressive campaign, confiscating and impounding bikes of commercial riders who have not fulfilled the administration’s set modalities

Out of frustration, the bikers on Tuesday, April 14, took to the streets of Bamenda demanding the release of their impounded motorbikes, but were intercepted by a mixed contingent of the Military and police officers at the Up Station hill, where the Divisional Officer for Bamenda 1 talked with the protesting riders.

Addressing the commercial bikers, the DO for Bamenda 1, Gilbert Guibai Balelena, remarked that, “We are in a country of law; everywhere here in Bamenda, you have a Sub Divisional Officer. When you want to express yourselves on what you don’t accept, go and see one of the DOs”. After harping on procedures to follow in order to lodge a complaint, Mr Gilbert Guibai Balelena told the protesting riders to select representatives who will talk to the administration on their behalf.

One of the riders who spoke to ***The Post*** lamented that they are caught between State officials and Separatists fighters in the Region. “We have received a stern warning from our brothers in the bushes that should we succumb to the order of spraying of bikes, we will see our bikes burnt before our own very eyes. If they burn our bikes, who are we going to hold accountable?” he asked.

The rider told ***The Post*** that they are ready and willing to fulfil all the requirements except that obliging them to spray all their bikes with a unique colour, yellow. To him, the Government should understand their plight and compromise on the spraying of bikes option, so that they do not face the risk of losing their livelihoods if they run into Separatist fighters in the Region.

**Where Are The New Bikes Impounded By Officers Kept?**

Apart from protesting against the painting of their bikes, some riders have also raised an alarm that some of the new bikes impounded by officers are nowhere to be found, as only old and broken bikes can be seen. Some of the riders expressed fears that their bikes may never be found and that they might have been sold out by unscrupulous officers and their command, after they were impounded.

Concerning the various documents requested from the riders by Government, ***The Post*** was told at the Bamenda City Council that the documents comprised Photocopy of Identity Card, driver’s license, insurance, number plate, Jackets, ‘categris’ and a spray of yellow colour.

<https://cameroonpostline.com/bamenda-bikers-trapped-between-stern-administrators-rigid-amba-fighters-%ef%83%98impounded-new-bikes-allegedly-missing-in-custody/%E2%80%8B>

1. [**Let The Disciplinary Axe Fall In All Transparency**](https://cameroonpostline.com/let-the-disciplinary-axe-fall-in-all-transparency/%E2%80%8B)

 MAY 2, 2020  [Let The Disciplinary Axe Fall In All Transparency](https://cameroonpostline.com/tag/let-the-disciplinary-axe-fall-in-all-transparency)

**By Yerima Kini Nsom**

What has made Cameroon look like the world headquarters of human rights abuses and violations is the impunity with which soldiers kill civilians, loot property and burn down villages in the two crisis-hit Northwest and Southwest Regions.

Each time, human rights organisations ring the alarm bell, Government officials would salute the army for its professionalism and embark on lies-stricken denial of barbaric acts committed by soldiers that are paid to protect the people.

The results of the Inquiry Commission that probed the Ngarbuh Massacre is an opportunity for the authorities to fix things by ending impunity and re-establishing the sanctity of human life and the sacredness of human rights in Cameroon.

Since the report itself is a frontal indictment of the soldiers who killed pregnant women and babies in Ngarbuh, disciplinary sanctions should be meted in all transparency.

Their trial at the Military Tribunal should be opened to the public. That way, it could be a deterrent to soldiers who give the impression that Government has given them a blank cheque to kill just anybody in the two Regions at will.

For one thing, the province of culpability spans beyond the soldiers and the Fulani herdsmen who committed the massacre. The local and regional administrators who condoned or covered up such a feat of State terrorism and some local elite allegedly recruited the Fualani herdsmen from neighbouring Nigeria, should face the music of the law.

Claims that the Government was misled into telling lies on the issue do not hold water. For, it was not the first time that overzealous Ministers tried to cover up military exactions with a sickening alchemy of lying statements.

The claim of being misled sounds very ridiculous for a country that has one of the most effective secret services in the world. The chain of those responsible for the Ngarbuh massacre should even go beyond those who did not only propagate falsehood in Government but also threatened every human rights organisation, every journalist, every civil society activist and every politician for speaking the truth.

I took off time to play with my dogs in self-consolation when the arrowheads of survival journalism join the lies-telling caravan, thereby prodding on the soldiers in the killing of civilians, including pregnant women and babies.

In order to give a false legitimacy to their lies, some Ministers stigmatised the Bishop of Kumbo, His Grace George Nkuo, politicians, Barrister Akere Muna, Prof. Maurice Kamto and Penda Ekoka, for revealing the story of military cruelty in Ngarbuh.

They even threatened to drag them to court. If such Ministers were in a State of law, they would have been pushed to resign or tender an open apology to these patriots and the entire Cameroonian people. They should now bow their heads in ignominy or, like guilty dogs, move with their tales in-between their legs, if their consciences are still potent. By their lies-telling on grave human rights abuses, such people scupper the corporate image of our beloved country by pushing it down the abyss of a pseudo-State wherein the fear of people in uniform is the beginning of wisdom. Otherwise, the music of their falsehood will not be upping its tenor every time human rights groups report the exactions of the military.

What the coterie of lies-tellers in the establishment do not seem to know is that lies are as ephemeral as perishable goods, while the truth, no matter how brutal it is, is sacrosanct. It becomes even more vicious when those lies are tailored to give an artificial view of such grave violations.

But the truth of the extra-judicial killings and arson in Kwa-kwa, Mamfe, Weh, Batibo, Menka-Pinyin, Babanki, Belo, Abuh, Njinikom, Mutengene, Nso, Mbonge, Mudemba and many other areas in the two Regions, have stubbornly refused to be a lie, even as the issue dies gradually behind the hills of time.

Indira Ghandi once stated that the truth will always prevail, even if its tellers are reduced to a minority of one person. One of Cameroon’s freedom fighters, Um Nyobe, once remarked that the truth needs no passport to travel to anywhere it wants. Small wonder that the Ngarbuh cruel truth finally travelled into the ears of President Paul Biya. That is why he created the Commission of Inquiry that finally unearthed the bare facts of the incident. This lays bare the naivety of those who thought that they could lie to the President forever. For one thing, President Biya is more or less, a taciturn and laconic character who usually speaks through actions on issues of grave national import.

At the time that die-hard CPDM supporters thundered the drums of the one-party system, rejecting multiparty democracy as unrealistic imported political models, President Biya shocked them. He decreed the era of party pluralism in Cameroon in the 90s. When word benders of the regime were basking in falsehood with claims that the Anglophone Problem was only an illusion, he waded in and said it was real. When the uniform officers arrested, handcuffed and took a young female journalist, Mimi Mefo, to the New Bell Prison in Douala, President Biya swiftly ordered for her release.

Those who have dutifully protected their tenacity of memory in the current feat of general amnesia will remember many more fatherly acts in which President Biya took exception to the falsehood of some of his overzealous Ministers.

As head of the Army, President Biya should not end his probing act with the truth of the Ngarbuh massacre. He should create more commissions to probe previous military exactions that did not only lead to the killing of civilians, but have equally decimated the sign post structures of the dogged self-reliance of the people of the two Anglophone Regions. This will restore the aura of credibility and nobility that our Army has lost to such malpractices. Such a move will also help Government to wash its hands clean of allegations that it is using the fight against the Separatists as a subterfuge to crush even those who are just asking for basic rights in the two Regions.

<https://cameroonpostline.com/let-the-disciplinary-axe-fall-in-all-transparency/%E2%80%8B>

1. [**Ngarbuh Massacre: Why Biya Should Punish CPDM Officials For Misleading Gov’t**](https://cameroonpostline.com/ngarbuh-massacre-why-biya-should-punish-cpdm-officials-for-misleading-govt/%E2%80%8B)

 MAY 8, 2020  [CPDM](https://cameroonpostline.com/tag/cpdm), [Killings In Ngarbuh](https://cameroonpostline.com/tag/killings-in-ngarbuh), [Ngarbuh](https://cameroonpostline.com/tag/ngarbuh)

**By Nformi Sonde Kinsai**

When the findings of the Commission Of Inquiry was published on April 21 by the Secretary General at the Presidency of the Republic, Ferdinand Ngoh Ngoh; on the tragic events of February 14 in Ngarbuh, Ntumbaw, the military officer who led the mission was blamed for submitting a biased report that misled Government in its initial declarations.

The Ngoh Ngoh communiqué had noted that “…on his return to Ntumbaw, Sergeant Baba Guida who led the operation, submitted a deliberately biased report to his superior, a report on which the Government initially based its statement.”

But according to a report that was forwarded by CPDM Nkambe to party hierarchy on the heels of the massacre captioned “Findings on Ngarbuh,” it is apparent that it was not only Sergeant Baba Guida who misled the Government; but members of the ruling CPDM party in Nkambe also did.

From their own findings, that was splashed on the CPDM Nkambe facebook page, “all the terrorist camps that had surrounded Ntumbaw to destroy it were eventually forced to dismantle and flee to Ngarbuh.”

It claims that terrorists from areas like Ntabah, Sop, Mbawrong, Mbam, Ntisaw, Mbankeng and Ntamru had all converged on Ngarbuh. The CPDM Nkambe findings stated that the “terrorists” moved to Ngarbuh with their logistics, notably; arms, ammunitions, gun powder, fuel, Indian hemp, and so on.

Maintaining that the fighters had moved to various neighbourhoods of Ngarbuh and other surrounding places, the report held that “Ngarbuh and Firu were main depots of smuggled fuel, ammunitions and gun powder packaged in fuel gallons. The terrorists that fled Mbam to Ngarbuh also fled with huge quantities of ammunitions and fuel.

Children, women mourning victims of Ngarbuh Massacre in church, after the men all escaped and sought refuge in the bushes

“After the massive turnout of voters in Ntumbaw in the just ended elections, they planned to attack the town and destroy it as they had always declared their intentions in the past and attempted to do on various occasions in a period of about a year and a half.

“The Fon of Ntumbaw was kidnapped when he led his population to clean school compounds for effective resumption in September 2019. He was taken to Bui and the population had to contribute and paid FCFA 5 million as ransom for his release after a week in a terrorists’ cell. Many inhabitants of Ntumbaw and its surrounding villages such as Ngarbuh have been accused of loyalty to the State by the same groups of terrorists and murdered or kidnapped, tortured and released only after payment of huge ransoms.

“The terrorists burnt down homes of inhabitants they accused of loyalty to the State, rustled thousands of cattle, robbed merchants, and so on,” the findings had stated.

**CPDM Nkambe Report Proper**

According to the writers of the CPDM Nkambe findings, “on 13 February in the evening, the military moved towards Ngarbuh through Mabu; but the terrorists were alerted and those of Mabu had fled towards Ngarbuh; while those of Ngarbuh were already heading to Mbam and Mbawrong. The military did not go further. They made a u-turn just after Mabu and returned to base.

“Commander ‘No Pity’ had been called up by some factions of the terrorists for reinforcement. ‘No Pity’ and his group arrived Ngarbuh fully dressed in military uniform and many took them for the military coming from Tatum. Ambas that were in ambush opened fire on ‘No Pity’ and his group. A serious fight ensued and fire broke out in houses in which Nigerian fuel was stored. Explosions succeeded each other as children and women tried to flee the scenes, in vain.

“’No Pity’ and his group concluded that they were setup and their response was without pity. The battle lasted till dawn. This is the story of Ngarbuh as narrated by an eyewitness Amba fighter who survived the incident and surrendered in Ntabah.

“Due to the gravity of their blunder and crime, and to destroy evidence, the terrorists hurriedly buried the bodies of the victims without proper procedures. Their heartless leaders abroad hastily took advantage of their own crimes to blame the army and loyal citizens. It was only after destroying all evidences that they started posting images on social media. Even victims who survived their massacre were reported as dead by the terrorists.

“It is worth noting that Ngarbuh since became a main depot for smuggled fuel, weapons and ammunitions where terrorists from Bui and Ngoketunjia came to buy. Many houses in and around Ngarbuh stocked Nigerian fuel and ammunitions, without considering the risks of potential fire disasters.

“A 20 litres plastic gallon can contain 1,000 bullets. It should be recalled that it was in Ngarbuh that we seized fuel containers stocked with bullets a few weeks ago.

“Mainly Amba commanders lived in the compound of an ex-convict turned Amba patron, known as Abdullahi Sunjo, and a few privileged fighters. They lived there always with their wives and prostitutes, including the daughters of Abdullahi, who were specialised in cultivation of Indian hemp and cooking for the fighters. They were always feasting on meat from stolen cattle, drank looted alcohol and smoked Indian hemp.

“While also transacting smuggled arms, ammunitions and Nigerian fuel to buyers from Bui Division and mainly the commander ‘No Pity’s’ group and its allies of Ngoketunjia Division,” the report of the CPDM Nkambe had narrated.

Meanwhile, one of the clauses in Ngoh Ngoh’s communiqué leading up to the blame on Sergeant Baba Guida for submitting a deliberately biased report to his hierarchy read that “…panic-stricken, the three servicemen with the help of some members of the vigilante committee tried to conceal the facts by causing fire.”

<https://cameroonpostline.com/ngarbuh-massacre-why-biya-should-punish-cpdm-officials-for-misleading-govt/%E2%80%8B>

1. [**Atanga, Sadi & Assomo Should Apoligise, Resign Or Be Dismissed**](https://cameroonpostline.com/atanga-sadi-assomo-should-apoligise-resign-or-be-dismissed/%E2%80%8B)

 MAY 2, 2020

By Bouddih Adams

The report of the Government Commission of Inquiry into the Ngarbuh Massacre, which revealed that it was actually the military that carried out the butchery, in cold blood, of unarmed civilians, including children and pregnant women, as reported by a couple of media organs and NGOs, has exposed a lot of things about those running the institutions of the State in Cameroon.

In every situation, they seek to protect the regime and, in turn, their positions by adapting anti-people stance, ignoring the people’s feelings and giving a psychedelic image of the regime to the international community.

Government Ministers took turns to bash human rights organisations, every journalist, every civil society activist and every politician for speaking the truth on the Ngarbuh Massacre. Now that the report has vindicated the few media and organisations that gave a true rendition of the happening, the Ministers and other officials like the SDO of Donga Mantung, ought to tender apologies, resign or be dismissed for telling lies and misleading the people they are supposed to serve.

The report has shown that all their pronouncements on what happened in Ngarbuh were pure fabrications from figments of their imaginations. Pure fiction!

**The Minister of Communication and Government’s Spokesman, Rene Emmanuel Sadi** had said: “Not far from the landmark chosen by the secessionist rebels as a logistical base for the storage of illicit goods, arms, ammunition of various calibres, as well as adulterated contraband products, narcotics and amulets, elements of our defence forces were violently attacked by a group of heavily armed individuals

“The legal forces consisting of six elite elements, responded vigorously and professionally, neutralising seven assailants and routing other individuals from the armed secessionist group.

“During the clashes that took place, a fire broke out in a fortified shelter that contained explosives and flammable materials stored by the armed rebels. This let to blasts, followed by tongues of fire that eventually spread and reached many dwellings.

“How can one believe, for a moment, that an army as disciplined and civic-minded as ours can loot civilian properties and kill the people whose protection and security is their mission? Under no circumstances have our defence and security forces deliberately undertaken to perpetrate abuses of any kind against the civilian populations at the service of whom they are assigned.”

**The Minister of Defence, Joseph Beti Assomo** had said: “There was a gun battle between soldiers and Ambazonia fighters on the day of the scene. As a result of that, there was an explosion which is the cause of the death of the villagers. It was not intentional.”

**The Minister of Territorial Administration, Paul Atanga Nji** had said: “… it could be difficult to imagine that most of these NGOs based in Africa, especially those operating in conflict zones, have hidden agendas which often have the tendency to destabilise sovereign States and their institutions.

“… we have noticed with dismay that many NGOs have clearly revealed themselves as enemies of our country, regularly propagating information that is completely false on the management of crisis by our Government in the [Northwest and Southwest] Regions. Moreover, they have become laboratories of fake reports with the sole objective to tarnish the image of the country’s defence and security forces.

“The Minister of Territorial Administration affirms here that these NGOs have received over FCFA 5 billion from dubious networks within and out of the country to: destabilise State Institutions; regularly publish, through certain media and social media, fabricated information to discredit the efficient management of the crisis in the Northwest and Southwest Regions by the Government.

“Among the tele-guided NGOs paid to tarnish the image of Cameroon, publish fake reports against the National Defence Forces, the Minister of Territorial Administration can cite: “Human Rights Watch”, “Amnesty International”, “International Crisis Group”, “OCHA”, “REDHAC and others.”

Such statements defending the defence and security forces after they have committed atrocities, one can say without fear or favour, only spur them to carry out same exactions, as they did in Babanki a couple of days after the Ngarbuh massacre.

The Ngarbuh massacre itself, could be an offshoot of earlier pronouncements by Government Ministers and other officials, each time the army acted ultra vires.

Another case in point is former Minister of Communication and Government Spokesmen, Issa Tchiroma, who rather praised the military as “very professional and valiant forces” after the killing of a woman and children in the Far North, averring that the videos of the extrajudicial executions, showed Malian military and not Cameroonian forces. As already said, such arguments for barbaric acts can only spur the military to commit more.

Nevertheless, these Ministers’ evident overzealousness surely blinded them or drove them into ignorance of the fact that, by their pronouncements, they are committing the crime impunity on the victims and survivors of the massacre, for which they will one day answer in front of international criminal courts, just as will those on the opposite camp, for their own crimes.

Meantime, they must apologise, or resign, or be dismissed.

***Are We Together?***

<https://cameroonpostline.com/atanga-sadi-assomo-should-apoligise-resign-or-be-dismissed/%E2%80%8B>

1. [**IDPs Caught Between COVID-19 & Anglophone Crisis**](https://cameroonpostline.com/idps-caught-between-covid-19-anglophone-crisis/%E2%80%8B)

 MAY 19, 2020  [anglophone crisis](https://cameroonpostline.com/tag/anglophone-crisis), [Covid 19 in cameroon](https://cameroonpostline.com/tag/covid-19-in-cameroon), [features](https://cameroonpostline.com/tag/features)

**By Etienne Mainimo Mengnjo**

John Princely is an Internally Displaced Person, IDP, from the crisis-hit Northwest Region of Cameroon. Just like him, many are seeking refuge in major towns of Cameroon. They have escaped from a war that has ravaged their lives and communities in the Northwest and Southwest Regions of Cameroon since 2016.

In Yaounde, John Princely is seen sitting under the scotching sun at the Simbock neighbourhood, His eyes are reddish, and he looks exhausted. From all indications, he has been hungry for the past few days. He is not ready to talk, but the expression on his face says all is not fine.

“The situation is one that I can’t tell. We thought that by escaping from the war-tone region of the Northwest, we are free, and could survive, but look at it. The coronavirus has caused so many problems, but we are managing. That is all I can tell you,” Princely said.

“We thought, we were free after running away from what is happening back home but little did we know that another one bigger than the war was under way. The fear of the coronavirus cannot be underestimated, but what I can tell you is that we are suffering. We can no longer do the little things we did to survive again, because of the virus. To have what to eat now is not a day’s job,” Samiratu Atoh another displaced person said.

On the crisis, which she opined can be better handled, she appealed, “This is a time for us to collectively bring to an end what is happening in the Northwest and Southwest Regions of our country. It is sad to see our children die every day and parents continue to run day and night, yet we are doing nothing to solve the problem. Government has done the little they can do but there is still much to be done. Let us not continue to pretend and enjoy, while the war is causing more harm to us.”

Those who talked to The Post, are just a few of the so many that are dotted around the country. They have in one way or the other raised their voices but the help that comes their way is very limited especially as the numbers only keep adding. Yaounde, for example is saturated with persons from the Northwest and Southwest Regions seeking refuge. Their pains and anguish are sorrowful but their cries and appeals mostly go unheeded.

Many of the IDPs live in overcrowded homes, and as such, cannot respect social distancing. The measures implemented to reduce the spread of the virus, negatively affected the IDPs who mostly depended on daily hustles to feed and lodge.

Some IDPs have continued to experience increased sexual and domestic violence because of confinement, isolation and loss of income.

A majority of IDP children, who for the second time have been forced out schools, cannot even follow the online teaching from home, as the online and television classes are going on. With the crisis and the pandemic, they are caught in the middle, and to some, the road to a better future looks very rocky.

<https://cameroonpostline.com/idps-caught-between-covid-19-anglophone-crisis/%E2%80%8B>

1. [**Biya Has Already Won October 7 Polls-Hon. Nkodo Ndang**](https://cameroonpostline.com/biya-has-already-won-october-7-polls-hon-nkodo-ndang/%E2%80%8B)

 JUL 26, 2018

**By Yerima Kini Nsom**

*The CPDM Section President for the Nyong and Mfoumou North-East in the Centre Region, Hon. Roger Nkodo Ndang, says President Biya has already won the October 7 Presidential Election.*

*“By virtue of the mobilisation of our militants, and by dint of the fact that the Nyong and Mfoumou North-East Section is voting 100 per cent for their National Chairman, I can say that President Paul Biya has already won the election,” Hon. Nkodo Ndang, who is also the President of the Pan-African Parliament told the press.*

*He was speaking during a rally in Gombo in Nyako Kombo Sub-division in the Nyong and Mfoumou Division on Saturday, July 22.*

*According to the politician, the unflinching support the local militants have for Biya makes the upcoming presidential election a mere formality.*

*To Nkodo, mobilising militants to give a 100 per cent vote to President Biya was not a difficult thing for them because they are constantly in touch with the masses in the field.*

*The MP expressed appreciation to President Biya for supporting his candidacy and blessing him to emerge as the President of the Pan-African Parliament for the second time.*

*He said he has beaten South Africa and North Africa in elections at the Pan-African Parliament four times in 12 years. Nkodo Ndang lauded the presence of the Dean of African Diplomats in Yaounde, H.E. Beti Marace Martial, who is the Ambassador of the Central African Republic and Algerian Ambassador to Cameroon, saying they were true friends.*

*He said militants were overwhelmed with joy that the incumbent Biya heeded the people’s call by declaring his candidacy.
He said as far as the upcoming election is concerned, “President Paul Biya is Nyong and Mfoumou North- East, Nyong and Mfoumou North-East is President Paul Biya.”*

*The MP said despite a smear campaign against him, he is waxing strong as President of the Pan-African Parliament.
For his part, the Section President of the Mfoumou North, Francis Zibi Samba, said despite the fact that President Biya is 85 years old and has been in office for 35 years, they were going to vote him 100 per cent because he is the voice of the people.*

*He condemned the on-going violence in the two Anglophone Regions, calling on all militants to stand behind President Biya because he is a man of peace.*

*The CPDM Central Committee Permanent Delegate to the Nyong and Mfoumou Constituency, Robert Nkili, lauded the militants for always standing behind President Biya.*

*To him, the militants even ought to show more loyalty to the President for supporting one of theirs, Nkodo Ndong to emerge as President of the Pan-African Parliament.*

*He said the setting of the love affair between CPDM National Chair and the people of Nyong and Mfoumou projects to 100 per cent vote people in the area will give President Biya in the upcoming October 7 election.*

*Taking the floor, the WCPDM President, Regine Mekono Aboudou, the Mayor of Kobdombo, Colin Ze Biwole Mimbama, all praised President Biya for projecting Nkodo Ndong.*

*They equally promised to express their gratitude by voting overwhelmingly for him on October 7. The Youth President called on his peers to stand against the destabilisation of Cameroon and support Biya to fight terrorism that is gradually plunging the country into chaos. The meeting sounded very much like a campaign rally, even though campaigns for the upcoming Presidential poll will be launched officially on September 24.*

*Hon. Nkodo Ndong who organised the meeting was not in that political ruse alone. The Minister of Women’s Empowerment and the Promotion of the Family also organised a rally in her native Mefou and Akono Division.
Various speakers at the occasion called for an overwhelming vote for President Biya.*

<https://cameroonpostline.com/biya-has-already-won-october-7-polls-hon-nkodo-ndang/%E2%80%8B>
