# Supplementary material
Source: Research Square preprint supplement (doi:10.21203/rs.3.rs-8545290/v1)
Supplement: Supplementary file 6 [file 870b64ab3c1f3f23a2464aff.docx]

| 1/21/2023 3:37 PM | | | | | | | | | | | | | | | | | |
| --- | --- | --- | --- | --- | --- | --- | --- | --- | --- | --- | --- | --- | --- | --- | --- | --- | --- |
| Coding Summary By Node | | | | | | | | | | | | | | | | | |
| PHD Thesis Coding | | | | | | | | | | | | | | | | | |
| 1/21/2023 3:37 PM | | | | | | | | | | | | | | | | | |
|  | | | **Aggregate** |  | **Classification** |  | **Coverage** |  | **Number Of Coding References** | |  | **Reference Number** |  | **Coded By Initials** |  | **Modified On** |  |
| **Node** | | | | | | | | | | | | | | | | |  |
|  | **Nodes\\Conflict** | | | | | | | | | | | | | | | |  |
|  | | **Document** | | | | | | | | | | | | | | |  |
|  | | | **Internals\\237 online** | | | | | | | | | | | | | |  |
| No |  |  |  | 0.0244 |  | 18 | |  | | | | | |
|  | | |  |  |  |  |  |  |  | |  | | | | | | |
|  | | | | | | | | | | | | 1 |  | CP |  | 12/5/2022 12:56 AM |  |
|  | Les 3 vaillants éléments des forces de défense camerounaise ont rendu l’âme, au cours des échanges de coups de feu avec les séparatistes.  L’armée camerounaise en deuil. Celle-ci vient de perdre des éléments. Hier, jeudi 26 novembre 2020, trois hommes appartenant au 21ème bataillon des fusillés marins ont perdu leurs vies, après avoir succombé à leurs blessures respectives. Ces derniers ont été grièvement été blessés par balle dans une embuscade tendue par des séparatistes. Les faits se sont déroulés dans la commune d’Ekondo Titi (département du Ndian, région du Sud-Ouest). | | | | | | | | | | | | | | | |  |
|  |  | | | | | | | | | | | | | | | |  |
|  | | | | | | | | | | | | 2 |  | CP |  | 12/5/2022 1:00 AM |  |
|  | Le coup de filet est le fruit d’une collaboration en parfaite synergie entre la gendarmerie de légion du Nord-Ouest et la population de la commune de Widikum (département de la Momo). « C’est l’occasion pour nous de saluer cette collaboration naissante et forte avec la population qui ne ménage plus aucun effort », déclare le commandant de la légion de gendarmerie de cette partie du pays. | | | | | | | | | | | | | | | |  |
|  |  | | | | | | | | | | | | | | | |  |
|  | | | | | | | | | | | | 3 |  | CP |  | 12/5/2022 1:06 AM |  |
|  | L’Armée camerounaise a repris le contrôle de la route Oku – Kumbo ( région du Nord-Ouest Cameroun), aux combattants séparatistes anglophones, après deux ans de blocus par ces derniers.  La route Oku- Kumbo est à nouveau réouverte à la circulation. Cela n’avait plus été le cas depuis deux ans. Cette voie de communication, était bloquée par les miliciens séparatistes anglophones, lesquels y avaient fait des tranchées de part et d’autre.  Selon des informations émanant des sources sécuritaires, 500 militaires qu’appuyaient 40 véhicules de combat, ont investi la susdite localité ce week-end, mettant fin à la barbarie des miliciens séparatistes. Concrètement, l’on apprend qu’une dizaine de combattants séparatistes a trouvé la mort, des camps d’entraînement détruits.  La route Oku- Kumbo est désormais libérée par l’Armée camerounaise. | | | | | | | | | | | | | | | |  |
|  |  |
|  |  | | | | | | | | | | | | | | | |  |
|  | | | | | | | | | | | | 4 |  | CP |  | 12/5/2022 1:11 AM |  |
|  | Les forces de défense viennent de neutraliser plusieurs combattants séparatistes, et détruit leur camp dans le Nord-Ouest.  L’armée camerounaise a engagé il y a 2 semaines une opération militaire d’envergure dans un camp de séparatistes dans l’arrondissement de Ndop, département du Ngo-Lituba (région du Nord-Ouest). Le camp en question est situé sur les bords du lac Babalang, à quelques kilomètres des départements du Noun et des Bamboutos dans la région de l’Ouest. Des sources militaires indiquent « plusieurs terroristes neutralisés » sans en préciser le nombre. L’armées a également découvert des armes et des munitions au cours de cette opération. « Cela a été une action très réussie, nous avons attaqué un camp des séparatistes et l’avons détruit », témoigne une source sécuritaire. Cette opération musclée de l’armée camerounaise rentre, renseigne-t-on, dans le cadre de l’opération de « ratissage de la zone » après l’attaque armée de la localité de Galim. En effet, la ville de Galim, dans le département des Bamboutos, région de l’Ouest, a été attaquée dans la nuit du 07 Mars 2020. Des assaillants lourdement armés sont entrés dans la ville, et ont attaqué la brigade territoriale de gendarmerie et le poste de sécurité publique. Sur le carreau, quatre éléments des forces de sécurité sont tombés, selon le gouvernement.  Offensive éclair | | | | | | | | | | | | | | | |  |
|  |  |
|  |  | | | | | | | | | | | | | | | |  |
|  | | | | | | | | | | | | | | | | | |
| Reports\\Coding Summary By Node Report | | | | | | | | | | Page 1 of 140 | | | | | | | |
| 1/21/2023 3:37 PM | | | | | | | | | | | | | | | | | |
|  | | | **Aggregate** |  | **Classification** |  | **Coverage** |  | **Number Of Coding References** | |  | **Reference Number** |  | **Coded By Initials** |  | **Modified On** |  |
|  | | | | | | | | | | | | | | | | | |
|  | | | | | | | | | | | | 5 |  | CP |  | 12/5/2022 2:10 AM |  |
|  | NGALA Elvis c’est son nom.  Gardien de la paix de 2e grade, Il est tombé hier 15 août 2019 dans la soirée à mile 90 à Bamenda suite à une attaque de la patrouille à laquelle il participait, par des forces indépendantistes anglophones, nous confie une source policière.  D’après les témoignages de certaine personnes, plusieurs hôtels dans les ville de Buea, Mutenguene et Kumba sont envahis par les militaires vêtus en civil.  Rappelons que la crise socio-politique anglophone fait déjà, depuis 3 ans qu’elle dure fait environ 2 000 morts et des milliers de déplacés internes et externes. | | | | | | | | | | | | | | | |  |
|  |  |
|  |  | | | | | | | | | | | | | | | |  |
|  | | | | | | | | | | | | 6 |  | CP |  | 12/5/2022 2:15 AM |  |
|  | L’officier du BIR, Nsangou Salim a été tué ce jeudi 4 juillet par des combattants séparatistes à Bamenda dans la région du Nord-Ouest. Selon des informations, l’officier du Bataillon d’Intervention Rapide a été assassiné devant son épouse et ses enfants.  Votre journal a appris avec consternation, l’assassinat hier jeudi 04 juillet 2019, d’un officier de l’Armée camerounaise.  L’officier du Bir Nsangou Salim, a été tué par de présumés séparatistes, en présence de son épouse ( voir photo du couple), et de ses enfants, et ce, à Bamenda, dans la région du Nord-Ouest du Cameroun.  Pour le moment, les circonstances de cette fin de vie tragique et choquante de l’officier, demeurent encore voilées.  Aucune communication n’a encore été faite à ce sujet, par le gouvernement camerounais. | | | | | | | | | | | | | | | |  |
|  |  |
|  |  | | | | | | | | | | | | | | | |  |
|  | | | | | | | | | | | | 7 |  | CP |  | 12/5/2022 11:32 PM |  |
|  | Le ministre de la Défense informe que les militaires ont été pris au piège par des séparatistes au lieu-dit Alachu/Bafut, dans la capitale régionale du Nord-Ouest.  Des pertes dans les rangs de l’armée camerounaise. Dans un communiqué publié le 16 mai 2019, le ministre de la Défense (MINDEF) indique que «dans la mi-journée du mercredi 15 mai 2019, deux soldats roulant à motocyclette dans la ville de Bamenda, ont été sauvagement et lâchement assassinés par des terroristes sécessionnistes, embusqués dans les habitations au lieu-dit Alachu/Bafut».  Sans donner d’informations sur les identités des militaires tués, Joseph Beti Assomo renseigne que «la descente immédiate d’une équipe d’intervention avec pour mission de boucler et ratisser la zone, s’est soldée par un échange de de coups de feu avec les terroristes qui ont tenté de prendre la fuite». C’est à ce moment qu’un incident s’est produit.  «Les militaires lancés à leur poursuite ont été pris à partie par de nombreuses personnes non identifiées et violentes. La confusion a provoqué des échauffourées avec destructions des biens et incendie de quelques maisons», informe le MINDEF. «Une enquête a été ouverte pour faire toute la lumière sur cette affaire et déterminer les auteurs des destructions de biens ayant provoqué un réel préjudice à leurs propriétaires. Les coupables identifiés répondront de leurs actes conformément à la loi», promet-il.  Ces incidents interviennent une semaine après le passage du Premier Ministre dans la capitale régionale du Nord-Ouest. Joseph Dion Ngute qui a passé le message de paix du Président de la République, désormais disposé à dialoguer avec les séparatistes de tous les sujets, à l’exception de la sécession. La preuve donc que le chemin de sortie de crise est encore long. | | | | | | | | | | | | | | | |  |
|  |  |
|  |  |
|  |  | | | | | | | | | | | | | | | |  |
|  | | | | | | | | | | | | 8 |  | CP |  | 12/6/2022 12:16 AM |  |
|  | Les concernés ont été tués à la suite de l’attaque du poste avancé de Dibunda, dans le Sud-Ouest, samedi dernier. Du matériel militaire a été récupéré sur place.  La marine camerounaise a tué dix-sept combattants sécessionnistes dimanche à Dibunda (département du Ndian, région du Sud-Ouest), dans le cadre d’une opération de riposte.  Les combattants tués faisaient partie de la milice séparatiste dénommée Forces de défense de «l’Ambazonie» (Afd), dont des membres ont attaqué le poste avancé de Dibunda, dimanche.  L’attaque est survenue au cours du ravitaillement du poste militaire d’Isangele, à la sortie de la ville de Mudemba. Trois militaires ont été blessés. Ils ont été transférés à Limbe et Buea. L’un des soldats a été évacué à Douala où il a subi une amputation du bras.  Le transport des victimes vers des formations hospitalières s’est fait par voie maritime, a-t-on appris auprès des sources sécuritaires. Et pour cause, la route Mudemba-Ekondo Titi-Kumba est encore contrôlée par les sécessionnistes.  L’armée a immédiatement lancé une opération de riposte qui s’est soldée par la destruction d’un camp séparatiste en brousse. Les militaires ont récupéré sur place quatre fusils de chasse, une moto, trois groupes électrogènes, onze matelas, des tenues militaires, un drapeau «ambazonien» et un autre portant les symboles de l’Afd. | | | | | | | | | | | | | | | |  |
|  |  |
|  |  | | | | | | | | | | | | | | | |  |
|  | | | | | | | | | | | | 9 |  | CP |  | 12/6/2022 12:40 AM |  |
|  | Des combats meurtriers ont eu lieu le 30 avril entre l’armée et les séparatistes à Wum dans le département de Menchum.  Ces derniers jours ont été marqués dans les régions anglophones, par de violents combats entre l’armée et les milices qui mènent la lutte armée pour la sécession. Ces affrontements ont été particulièrement meurtriers le 30 avril 2019 dans la ville de Wum.  L’armée a en effet, pris d’assaut un camp dans lequel se trouvaient les combattants séparatistes dans cette ville, chef-lieu du département de Menchum, dans le Nord-Ouest. Des échanges de tirs ont eu lieu et selon des sources sécuritaires, plusieurs sécessionnistes ont été tués. Côté armée, au moins quatre éléments ont perdu la vie.  Depuis plusieurs jours, un regain de violence est observé dans la crise sociopolitique qui secoue les régions du Nord-Ouest et du Sud-Ouest. Surtout, vis-à-vis des forces de défense et de sécurité qui mènent la lutte contre les bandes armées pro séparatistes. Dans la matinée du 28 avril, le commissaire de police David Asoh a été abattu à Sabongari, localité située dans le département du Donga Mantung au Nord-Ouest.  En l’espace d’une semaine, deux hommes en tenue ont été tués et décapités. Il s’agit du gendarme Adam Assana, tué à Muyuka au Sud-Ouest et du soldat Arthur Banka Tah, assassiné à Wum. Des atrocités condamnées par l’ambassadeur des Etats-Unis au Cameroun, Peter Henri Barlerin. Le diplomate américain en a profité pour réitérer l’appel au cessez-feu et à l’instauration d’un dialogue inclusif. | | | | | | | | | | | | | | | |  |
|  |  |
|  |  | | | | | | | | | | | | | | | |  |
| Reports\\Coding Summary By Node Report | | | | | | | | | | Page 2 of 140 | | | | | | | |
| 1/21/2023 3:37 PM | | | | | | | | | | | | | | | | | |
|  | | | **Aggregate** |  | **Classification** |  | **Coverage** |  | **Number Of Coding References** | |  | **Reference Number** |  | **Coded By Initials** |  | **Modified On** |  |
|  | | | | | | | | | | | | | | | | | |
|  | | | | | | | | | | | | 10 |  | CP |  | 12/6/2022 12:54 AM |  |
|  | Le corps d’un homme non identifié et vêtu d’une tenue militaire a été découvert samedi matin à Bambui, dans le nord-ouest du Cameroun.  Les habitants disent que ce corps retrouvé aurait été jeté là par des combattants présumés séparatistes.  Ils ajoutent que des coups de feu ont été entendus vendredi soir lors des affrontements intenses entre force de sécurité et combattants séparatistes.  Selon certaines sources, le corps retrouvé aurait résulté de cet affrontement. Mais l’armée n’a pas encore annoncé ni confirmé la perte d’élément dans la région. | | | | | | | | | | | | | | | |  |
|  |  | | | | | | | | | | | | | | | |  |
|  | | | | | | | | | | | | 11 |  | CP |  | 12/6/2022 12:55 AM |  |
|  | Les hommes armés actifs dans la région du Nord-ouest avaient fait du Lycée technique de Kumbo une de leurs bases.  Dans une « note d’information », des détails sont apportés sur l’attaque du 4 avril à Melouf, un quartier de Kumo, région du Nord-ouest du Cameroun.  « En effet, le 4 avril dernier, une Force constituée des éléments de la gendarmerie et de la police, a mené une opération sur la base des renseignements reçus de la population, contre une base de retranchement d’une bande de terroristes qui s’étaient installés au Lycée Technique de Kumbo, après en avoir interdit l’accès aux élèves », apprend –on de ce document.  L’on peut également y lire que « la force, qui s’est retrouvée coincée par les tirs de l’ennemi qui avait reçu du renfort des bases voisines, a été soutenue par le détachement du BIR stationné dans la ville, dont le rôle principal a été de dégager les barricades et refermer les tranchées creusées à plusieurs endroits sur la route ».  Bilan des courses « 4 terroristes neutralisés, 10 armes de traite récupérées, 18 munitions de calibre 12 récupérées, un stock de gris-gris détruit ». | | | | | | | | | | | | | | | |  |
|  |  |
|  |  | | | | | | | | | | | | | | | |  |
|  | | | | | | | | | | | | 12 |  | CP |  | 12/6/2022 1:01 AM |  |
|  | L’armée camerounaise a neutralisé sept assaillants au cours d’une « opération de reconnaissance offensive » samedi à Alabukam, près de Bamenda, chef-lieu de la région anglophone du Nord-Ouest, a-t-on appris de sources proches des forces de défense.  L’opération a permis la destruction d’un camp de combattants sécessionnistes et la récupération d’armes légères, de munitions, d’uniformes militaires et de moyens de transport comme des motocyclettes, ont indiqué les mêmes sources à l’AFP.  Cette offensive survient après des appels au cessez-le-feu lancés par le président Paul Biya en novembre et décembre derniers.  Début décembre, Yaoundé a mis en place un programme de désarmement dans toutes ses zones en conflit avec un comité national de désarmement, de démobilisation et de réintégration (CNDDR) pour les combattants.  Les leaders officiels des organisations sécessionnistes, arrêtés début 2018 au Nigeria et dont le procès à Yaoundé a été renvoyé au 7 février, n’ont pas répondu à cette offre.  « Si l’appel à déposer les armes que j’ai lancé aux entrepreneurs de guerre reste sans réponse, les forces de défense et de sécurité recevront instruction de les neutraliser », avait déclaré M. Biya en présentant ses voeux le 31 décembre. | | | | | | | | | | | | | | | |  |
|  |  |
|  |  | | | | | | | | | | | | | | | |  |
|  | | | | | | | | | | | | 13 |  | CP |  | 12/6/2022 1:02 AM |  |
|  | Au moins 20 séparatistes armés ont été neutralisés par les éléments du 52 Bataillon d’Infanterie Motorisée (BRIM) sur l’axe de Sabongari et Nkambe, région du Nord-ouest.  Selon nos informations, une patrouille de la 52e BRIM de Nkambe, en opération militaire chemin est tombée sur des séparatistes armés sur l’axe Sabongari-Nkambe.  « Les séparatistes ont ouvert le feu en premier sur nos éléments qui ont riposté, une vingtaine de terroristes ont été tués », confie une source militaire.  Dans son message à la nation du 31 décembre, le président Biya a promis de neutraliser tous les séparatistes qui n’accepteraient pas son appel à déposer les armes, « si l’appel à déposer les armes que j’ai lancé aux entrepreneurs de guerre reste sans réponse, les forces de défense et de sécurité recevront instruction de les neutraliser», déclarait le chef d’Etat camerounais.  Ayuk Tabe  Le leader séparatiste, Ayuk Tabe et 9 de ses coaccusés arrêtés en janvier 2018 et dont le procès a été ouvert le 6 décembre dernier sont jugés au tribunal militaire de Yaoundé pour « actes de terrorisme », « hostilité contre la patrie » et « atteinte à la sûreté intérieure et extérieure ».  La deuxième audience de leur procès a eu lieu le 10 janvier. Les leaders séparatistes qui contestent la nationalité camerounaise devant le tribunal, risquent la peine de mort. | | | | | | | | | | | | | | | |  |
|  |  |
|  |  |
|  |  | | | | | | | | | | | | | | | |  |
|  | | | | | | | | | | | | | | | | | |
|  | | | | | | | | | | | | | | | | | |
| Reports\\Coding Summary By Node Report | | | | | | | | | | Page 3 of 140 | | | | | | | |
| 1/21/2023 3:37 PM | | | | | | | | | | | | | | | | | |
|  | | | **Aggregate** |  | **Classification** |  | **Coverage** |  | **Number Of Coding References** | |  | **Reference Number** |  | **Coded By Initials** |  | **Modified On** |  |
|  | | | | | | | | | | | | | | | | | |
|  | | | | | | | | | | | | 14 |  | CP |  | 12/6/2022 1:13 AM |  |
|  | Au moins 23 séparatistes armés que Yaoundé qualifie de « terroristes », ont été tués entre jeudi et vendredi par les forces de défense et de sécurité dans plusieurs affrontements, a-t-on appris de source sécuritaire autorisée.  A Ndop, dans le département du Ngo-Ketundja, région du Nord-ouest, dix-sept séparatistes ont été tués et deux autres capturés ce jeudi. Des engins roulants, des appareils de communication ainsi que des armes et munitions ont été saisis jeudi lors d’une opération de l’armée.  « Les séparatistes ont ouvert le feu au moment où les forces de sécurité leur demandaient de se rendre. Ceux qui se sont rendus ont été capturés. Ils sont en cours d’exploitation », déclare le Colonel chef de la division Communication au ministère de la défense.  Dans le même temps, cinq séparatistes ont été tués dans la petite localité de Moudoum à 35 km de Bafut, région du Nord-ouest.  Les régions du Nord-ouest et du Sud-ouest, majoritairement peuplées des camerounais d’expression anglaise sont secouées depuis fin octobre 2016 par des revendications sociopolitiques qui ont débouché sur des affrontements entre forces de défense et de sécurité et gangs armés revendiquant la sécession du Cameroun.  Selon des avocats, le domicile de John Fru Ndi chef du SDF, principal parti de l’opposition parlementaire a été incendié par des individus non identifiés.  « Sa sœur a été enlevée, on n’ignore où elle se trouve », ont poursuivi les avocats du SDF devant le conseil constitutionnel.  Ces avocats plaidaient pour l’annulation totale du scrutin indiquant que dans les deux régions du | | | | | | | | | | | | | | | |  |
|  |  |
|  |  |
|  |  | | | | | | | | | | | | | | | |  |
|  | | | | | | | | | | | | 15 |  | CP |  | 12/6/2022 2:02 AM |  |
|  | Durant sa contre-offensive dans le but de protéger la vie du ministre Joseph Beti Assomo, les militaires camerounais ont abattu au moins six rebelles sécessionnistes.  Les faits donnent raison à ceux qui ont pensé qu’un voyage du Ministre délégué à la présidence, chargé de la défense en zone de guerre dans la Région du Sud-Ouest était risqué.  Dépêché en urgence par le président de la République, chef des armées, le ministre Joseph Beti Assomo a débarqué en hélicoptère en fin de matinée de ce jeudi 12 juillet 2018 à Kumba, chef-lieu du département de la MEME.  Selon nos sources, le ministre de la défense avait pour mission de réactiver le moral des troupes de l’armée camerounaise qui serait au plus bas à la suite des épreuves tragiques vécues ces dernières 72 heures. Les mêmes sources indiquent que le parton délégué de l’armée camerounaise s’est rendu également au front pour procéder à l’installation solennelle d’un nouveau poste de commandement des opérations à Small Ekombe, une localité de l’arrondissement de Mbonge.  Le déploiement du ministre sur le terrain n’a pas été une sinécure. « La venue du Ministre de la défense est considérée par les sécessionnistes comme un défi, Pour nous qui vivons ici, le département de la MEME est presque contrôlé par les rebelles. Ils estiment donc que la présence d’un haut membre du gouvernement central dans cette localité est un affront » explique une élite de Kumba joint au téléphone.  Ainsi, les rebelles ont lancé une offensive contre le convoi du Ministre sur la route de Mbonge. Les éléments des forces de défense et de sécurité ont immédiatement riposté.  « Patrouille de balayage venant au contact du Convoi Mindef a été freinée par irrédentistes. Réaction fulgurante, 6 sécessionnistes neutralisés. Mindef ordonné poursuite mission » a expliqué le Colonel Didier Badjeck, chef de Division du Ministère de la défense,  Si les hôtes venus de Yaoundé ont tenu à aller au bout de leur mission, l’on note que cette visite a été sérieusement perturbée et ensanglantée. En dehors des six sécessionnistes abattus, quelques membres de la suite officielle du ministre de la défense ont été grièvement blessés.  Parmi les blessés admis à l’hôpital militaire de Douala, figure notre confrère Grégoire Djarmaila en service au journal gouvernemental Cameroon-Tribune.  Le bilan officiel de cette attaque n’est pas disponible au moment de mettre cet article en ligne.  Depuis le début de cette semaine, les Forces de défense et de sécurité ont perdu plusieurs éléments dans de violents combats contre des terroristes sécessionnistes dans la Région du Sud-Ouest.  https://www.237online.com/cameroun-crise-anglophone-des-secessionnistes-attaquent-le-convoi | | | | | | | | | | | | | | | |  |
|  |  |
|  |  |
|  |  |
|  |  | | | | | | | | | | | | | | | |  |
|  | | | | | | | | | | | | 16 |  | CP |  | 12/6/2022 2:04 AM |  |
|  | Pris dans une embuscade de week-end, des gendarmes ont échangé des tirs avec des séparatistes ; ils ont éliminé quelque 6 d’entre eux en perdant un des leurs.  L’une des 07 victimes de ces altercations est un gendarme qui officiait dans la patrouille opérationnelle. Son corps sans vie a été retrouvé dans les maquis, à coté de 6 autres, par ses collègues en mission de soutien. Comme l’a rapporté le Col. Didier BADJECK, communicant du Ministère de la défense, ce soldat était d’une escorte d’éléments de la gendarmerie d’Andek cheminant avec quelques-uns du Bataillon troupes aéroportées (BTAP) de Koutaba à bord d’un Pick-up qui ont été surpris par un guet-apens est tombée des sécessionnistes à Tuguy, près de Mbengwi dans le département de la Momo. Outre l’unique mort enregistré chez les soldats, cinq | | | | | | | | | | | | | | | |  |
|  |  |
|  |  | | | | | | | | | | | | | | | |  |
|  | | | | | | | | | | | | 17 |  | CP |  | 12/7/2022 12:38 AM |  |
|  | Deux groupes d’individus se sont battus dans la soirée de jeudi, sans qu’aucune perte en vie humaine ne soit enregistrée.  Deux groupes de sécessionnistes se sont affrontés jeudi, 1er février, à Kwa-Kwa dans la région du Sud-Ouest, a-t-on appris, de sources concordantes, ce vendredi.  Les bandes en question sont opposées sur l’orientation à donner au combat. Selon certaines sources, l’un des groupes souhaiterait abandonner les hostilités engagées en vue de la création d’un Etat d’Ambazonie sur le territoire camerounais couvrant les régions du Sud-Ouest et du Nord-Ouest. L’autre groupe, lui, reste dévoué à la cause séparatiste, tous les moyens aidant.  Il est difficile d’affirmer, ce vendredi, si des personnes sont mortes durant les échanges de coups de feu. Des sources confient cependant que des blessés ont été enregistrés de part et d’autre et que quelques voitures de civils ont été incendiées. | | | | | | | | | | | | | | | |  |
|  |  |
|  |  | | | | | | | | | | | | | | | |  |
| Reports\\Coding Summary By Node Report | | | | | | | | | | Page 4 of 140 | | | | | | | |
| 1/21/2023 3:37 PM | | | | | | | | | | | | | | | | | |
|  | | | **Aggregate** |  | **Classification** |  | **Coverage** |  | **Number Of Coding References** | |  | **Reference Number** |  | **Coded By Initials** |  | **Modified On** |  |
|  | | | | | | | | | | | | | | | | | |
|  | | | | | | | | | | | | 18 |  | CP |  | 12/7/2022 12:48 AM |  |
|  | Selon les premières indications, le gendarme major Bienvenu Djonghay était en détachement dans le Nord-Ouest, comme nombre de ses camarades. Lundi, peu après 9h, le gendarme venu de Bafoussam participait à une chasse lancée pour attraper des individus qui se sont attaqués aux élèves du lycée de Jakiri. Les assaillants l’ont encerclé et, avec sa propre arme, ils l’ont atteint de cinq coups mortels. Par la suite, ils ont fondu dans la nature. | | | | | | | | | | | | | | | |  |
|  |  | | | | | | | | | | | | | | | |  |
|  | | | **Internals\\Bamenda Online articles** | | | | | | | | | | | | | |  |
| No |  |  |  | 0.0154 |  | 11 | |  | | | | | |
|  | | |  |  |  |  |  |  |  | |  | | | | | | |
|  | | | | | | | | | | | | 1 |  | CP |  | 12/7/2022 11:34 PM |  |
|  | The MP for Bamenda-Bali, Hon. Fobi Nchinda, one of the few to brief the press about what was discussed behind closed doors said he made it clear to the minister that “ there is a problem in the Northwest and that children have not been going to school” He also said he specifically  told the Governor and the minister that they should make sure that the Head of State get the message that there is a serious crisis in the region and that the president should call a conference to discuss the form of the state and by extension the Anglophone educational system and the exams. | | | | | | | | | | | | | | | |  |
|  |  | | | | | | | | | | | | | | | |  |
|  | | | | | | | | | | | | 2 |  | CP |  | 12/7/2022 11:40 PM |  |
|  | Cameroon is being sued for blocking the internet in its Anglophone regions  Two international digital rights advocacy groups have joined the growing clamor to stop Cameroon’s government disrupting internet services in its Anglophone regions.  Access Now and Internet Sans Frontières (ISF) have intervened on behalf a consortium of local and regional civil society organizations who previously sued the government for blocking access to the internet in the South West and North West English-speaking regions. In court documents filed to the constitutional council and seen by Quartz, the organizations say the current shutdown violates the rights to freedom of expression, access to information, non-discrimination based on language, and hinders economic, social, and cultural rights.  The filings, the first of its kind against a government by the organizations, seek to show the internet cut-off was violating regional and international frameworks that support the right to seek, receive and impart information and ideas through digital means. The petitioners also hope to show that the blanket ban was not proportionate and that the government failed to present a legitimate aim for the blackout. | | | | | | | | | | | | | | | |  |
|  |  |
|  |  | | | | | | | | | | | | | | | |  |
|  | | | | | | | | | | | | 3 |  | CP |  | 12/8/2022 12:36 AM |  |
|  | President Paul Biya in a rare televised outing on September  10, 2019 announced the convening of a major National dialogue without exclusion  as part of the solution to the crisis rocking the Northwest and Southwest  regions of the country. | | | | | | | | | | | | | | | |  |
|  |  | | | | | | | | | | | | | | | |  |
|  | | | | | | | | | | | | 4 |  | CP |  | 12/8/2022 12:46 AM |  |
|  | The government of Cameroon and the administration of the Northwest and Southwest regions have seen another desperate attempt to have schools reopen in Anglophone Cameroon perturbed by the annoying ghost towns that have rendered them helpless in the front of a national crisis.  Northwest Governor, Adolph Lele Lafrique was on the brink of becoming a hero for the regime, for having succeeded where the Prime Minister, the ministers of Higher Education, Secondary and Basic, and the Paul Ghogomou’s Commission had failed by having the Anglophone Teachers’ signed a communiqué calling off the strike action they initiated since November 21, 2016.  He had succeeded to have the Baptist Teachers Trade Union, the Presbyterian Education Authority Teachers’ Union, The Teachers’ Association of Cameroon and Cameroon Teachers’ Trade Union signed a document calling off the strike which was proudly presented over CRTV as a panacea to the Anglophone crisis, and the full resumption of classes for the second term.  Southwest governor Okalia Bilia even went further calling on all to put hands on decks for a successful celebration of the upcoming Youth Day as a show of national unity. But to their utter dismay, the ghost came visiting on Monday February 6 once more. His counterpart of the Northwest drove down to Nkambe to ensure a smooth resumption but was greeted by a ghost town. | | | | | | | | | | | | | | | |  |
|  |  |
|  |  | | | | | | | | | | | | | | | |  |
|  | | | | | | | | | | | | 5 |  | CP |  | 12/8/2022 1:39 AM |  |
|  | The national Executive Council  (NEC) of the Social Democratic Front – SDF has decided to put to the forefront,  its “federalism Agenda” in the face of the rising Anglophone crisis. This was one of the major outcomes of the NEC meeting on Saturday September 16, 2017, as the party prepares for the 9th national elective convention in October.  Nkemlemo Denis, National Communication vice Chair in his press briefing after the NEC conclave accused those advocating for separation of being sponsored, some by the CPDM. He said the party will accelerate the pressure on the regime to adopt a federal system of government. He said the SDF is the only party that holds the peace of Cameroon.  He blamed the government and the separatists of being extremist in the crisis | | | | | | | | | | | | | | | |  |
|  |  |
|  |  | | | | | | | | | | | | | | | |  |
| Reports\\Coding Summary By Node Report | | | | | | | | | | Page 5 of 140 | | | | | | | |
| 1/21/2023 3:37 PM | | | | | | | | | | | | | | | | | |
|  | | | **Aggregate** |  | **Classification** |  | **Coverage** |  | **Number Of Coding References** | |  | **Reference Number** |  | **Coded By Initials** |  | **Modified On** |  |
|  | | | | | | | | | | | | | | | | | |
|  | | | | | | | | | | | | 6 |  | CP |  | 12/8/2022 1:43 AM |  |
|  | Some opposition Members of Parliament of the opposition Social Democratic Front -SDF have disrupted proceeding in the National Assembly, demanding the Anglophone crisis be tabled for discussion.  The MPs took to the rostrum chanting songs commonly used by Anglophones in confrontation with security forces during the crisis, forcing the speaker and other ruling CPDM MPs to abandon the session to the handful of SDF MPs. | | | | | | | | | | | | | | | |  |
|  |  | | | | | | | | | | | | | | | |  |
|  | | | | | | | | | | | | 7 |  | CP |  | 12/8/2022 1:44 AM |  |
|  | The Social Democratic Front SDF has live true to its threats to force the Anglophone Crisis onto the agenda of the national Assembly by hook or by crook. SDF deputies once again broke into parliament today, asking their peers of the presidential majority to table the crisis for discussion which they consider paramount to any other item on the agenda  Hon. Joseph Banadzem, SDF parliamentary group leader took to the rostrum, snatched the microphone from the Prime Minister who was about to present the 2018 draft budget.  Immediately some members of government like Gregoire  Owona and the PM’s security came to his defense blocking SDF MPs who were determined to interrupt his presentation.  The PM continued his presentation albeit drowned in the chanting by SDF MPS | | | | | | | | | | | | | | | |  |
|  |  |
|  |  | | | | | | | | | | | | | | | |  |
|  | | | | | | | | | | | | 8 |  | CP |  | 12/12/2022 12:56 AM |  |
|  | The Early Day Motion 1189 is sponsored by Hywel Williams of Plaid Cymru party and supported by MPS from across the British political divide including MPs from the Labour and Conservative parties and the Scottish National Party. The Early Day Motion 1189 titled the “Anglophone Crisis in Cameroon” was tabled on the 24 of April 2018.  The motion reads “That this House condemns the violence and state oppression imposed by the Government of Cameroon in the Anglophone regions of the country; highlights with regret that over 20,000 refugees from Cameroon have been registered by the UNHCR in their camps across the border in Nigeria; acknowledges reports that an estimated 1,000 people have been detained and 100 people shot for opposing the Government’s oppression of the English-speaking community; notes that the Government of Cameroon responded to peaceful protests in 2017 by closing borders to the anglophone regions and deploying the Army’s Rapid Intervention Brigade; further condemns the Government of Cameroon for its decision to use force and appeals for a peaceful solution to be found; and calls on the UK Government to press the Government in Cameroon to open talks with anglophone leaders”  The last of the 15 MPs to sign the motion is Douglas Chapman from the | | | | | | | | | | | | | | | |  |
|  |  |
|  |  | | | | | | | | | | | | | | | |  |
|  | | | | | | | | | | | | 9 |  | CP |  | 12/12/2022 12:55 AM |  |
|  | Cameroon’s ministry of Post and Telecommunication (MINPOSTEL) has described as “fake news” a social media allegation that the government will shut down the internet from the 7-9 of October, 2018. Dates which coincides with the holding of the 2018 Presidential elections and its immediate aftermath. | | | | | | | | | | | | | | | |  |
|  |  | | | | | | | | | | | | | | | |  |
|  | | | | | | | | | | | | 10 |  | CP |  | 12/8/2022 2:04 AM |  |
|  | suspected Ambazonia separatist commander operating in Kumbo, Shey Wirngo has been arrested.  Reports from Bui division say Shey Wirngo and his group were intercepted by elements of the gendarmerie on March 30, 2019 in the outskirt Kumbo, about a 100 km North East of Bamenda, the regional capital. He was arrested alongside some of his fighters following an intense gun exchange with security forces that lead to the death of at least two secessionist fighters.  Shey Wirngo became | | | | | | | | | | | | | | | |  |
|  |  | | | | | | | | | | | | | | | |  |
|  | | | | | | | | | | | | 11 |  | CP |  | 12/12/2022 12:41 AM |  |
|  | The Arch Bishop of the Bamenda Arch Diocese, His Grace Cornelius Fontem Esua, the Auxiliary Bishop of Bamenda  Mgr. Micheal Bibi, the Bishop of Kumbo, Mgr.George Nkuo the Principals of Our Lady of Lourdes and Sacred Heart Mankon, and the principal of Saint Bedes College Ashing Kom were due to appear before the Court of First Instance Bamenda on Friday May 21, 2017 to answer charges on seven counts brought against them by a group of parents under the canopy of the Consortium of Parents whose children attend various mission institutions.  The Bishops and Principals | | | | | | | | | | | | | | | |  |
|  |  | | | | | | | | | | | | | | | |  |
|  | | | **Internals\\Cameroon Tribune** | | | | | | | | | | | | | |  |
| No |  |  |  | 0.0292 |  | 25 | |  | | | | | |
|  | | |  |  |  |  |  |  |  | |  | | | | | | |
|  | | | | | | | | | | | | 1 |  | CP |  | 1/21/2023 12:56 AM |  |
|  | The college of four lawyers defending the magistrate say existing laws were violated in the arrest and so he should be freed. Close-door deliberations on whether or not the request should be granted began at the Mfoundi High Court in Yaounde yesterday March 16, 2017. This was under the President, Nke Joseph Marie, State Prosecutor, Tang Ruben and Court Registrar, Ekassi Renee. Barrister Luke Kisob led a college of four lawyers to defend the incarcerated super-scale magistrate Ayah Paul Abine. | | | | | | | | | | | | | | | |  |
|  |  | | | | | | | | | | | | | | | |  |
| Reports\\Coding Summary By Node Report | | | | | | | | | | Page 6 of 140 | | | | | | | |
| 1/21/2023 3:37 PM | | | | | | | | | | | | | | | | | |
|  | | | **Aggregate** |  | **Classification** |  | **Coverage** |  | **Number Of Coding References** | |  | **Reference Number** |  | **Coded By Initials** |  | **Modified On** |  |
|  | | | | | | | | | | | | | | | | | |
|  | | | | | | | | | | | | 2 |  | CP |  | 1/21/2023 1:03 AM |  |
|  | While rumors are rife that Bamenda will witness a ghost town this Monday January 9, the government has embarked on a campaign to call on teachers, students and pupils to resume classes. Despite this, most parents are still skeptical to send their children to school. In the North West regional capital of Bamenda most parents say they will not send their children to school because the whole town is militarized and there is an aura of fear of the unknown. | | | | | | | | | | | | | | | |  |
|  |  | | | | | | | | | | | | | | | |  |
|  | | | | | | | | | | | | 3 |  | CP |  | 1/21/2023 1:15 AM |  |
|  | Consortium of Parents with children in some mission academic schools claim FCFA 150 billion from respective officials accused for refusing to teach their children. Anew development has emerged in the anglophone crisis with some church leaders and college principals summoned to appear before the Bamenda and Buea courts of 1st instance on April 21st, 2017. The direct summons at the request of a certain consortium of parents whose children are in some mission academic institutions want the Catholic Archbishop of Bamenda His Grace Cornelius Fontem Esua along with the president of the provincial Episcopal conference His Lordship George Nkuo, the principals of Sacred Heart college, St Bedes college and our Lady of Lourds college, the Executive President of the Cameroon Baptist Convention (CBC) Rev. Ncham Godwill and the Moderator of the PCC to answer charges which include.; failure | | | | | | | | | | | | | | | |  |
|  |  |
|  |  | | | | | | | | | | | | | | | |  |
|  | | | | | | | | | | | | 4 |  | CP |  | 1/21/2023 1:43 AM |  |
|  | Le communiqué de presse du président du Conseil national de la Communication parvenu à notre Rédaction. «Le président du Conseil national de la Communication (CNC) constate avec regret que, dans leurs productions médiatiques, notamment sur la crise en cours dans les régions du Nord-Ouest et du Sud-Ouest, certains professionnels des médias, en violation des règles éthiques et déontologiques de la communication sociale, ont choisi, souvent par la publication d’informations sans fondement et sans vérification, d’inciter l’opinion à la violence et à la haine à travers les contenus médiatiques. Des telles pratiques non professionnelles exacerbent les tensions déjà existantes sur nos chères valeurs nationales d’unité, d’intégration et de paix sociale en mettant ainsi en péril notre poursuite collective des nobles idéaux du pluralisme, de démocratie, du multiculturalisme et du vivre-ensemble. | | | | | | | | | | | | | | | |  |
|  |  |
|  |  | | | | | | | | | | | | | | | |  |
|  | | | | | | | | | | | | 5 |  | CP |  | 1/21/2023 1:44 AM |  |
|  | «The President of the National Communication Council observes with regret that in their reporting, especially of the ongoing crisis in the North West and South West Regions, certain media organs and journalists have, with brazen and recurrent disregard for professional ethics, been failing to sift incitement to violence and hate from their content, often crafting and spreading fake news without full verification. Such unprofessional practices only serve to deepen the already existing strains on our cherished national values of unity, integration and social peace, as well as endanger our collective pursuit of the lofty ideals of pluralism, democracy, multiculturalism and togetherness. As the nation celebrates the 46th National Day on May 20, 2018 under the theme, “Cameroonian citizens, let us remain united in diversity and preserve social peace, for a stable, indivisible and prosperous Cameroon,” the President of the National Communication Council seizes the opportunity | | | | | | | | | | | | | | | |  |
|  |  |
|  |  | | | | | | | | | | | | | | | |  |
|  | | | | | | | | | | | | 6 |  | CP |  | 1/21/2023 1:53 AM |  |
|  | Le phénomène a peut-être connu son apogée au Cameroun cette année, entre la crise au Nord-Ouest et au Sud-Ouest la présidentielle 2018. Crise dans les régions du Nord-Ouest et du Sud-Ouest et élection présidentielle 2018. C'est sûrement les deux théâtres d'opération qui ont subi le plus de fake news lors de cette année écoulée. Entre vidéos, photos et éléments sonores détournés, documents prétendument officiels annonçant telle ou telle autre mesure, donnant des « instructions », révélations fracassantes, faux comptes créés sur les réseaux sociaux pour partager de fausses informations ou encore, et surtout, distiller la haine. Avec une cote d'alerte tellement élevée, surtout pour la crise au Nord-Ouest et au Sud-Ouest NoSo, que les émissaires de Facebook n'ont pas hésité à faire le déplacement pour le Cameroun en août 2018, entre ateliers en direction des médias et de la société civile, rencontres avec les autorités. | | | | | | | | | | | | | | | |  |
|  |  |
|  |  | | | | | | | | | | | | | | | |  |
|  | | | | | | | | | | | | 7 |  | CP |  | 1/21/2023 2:12 AM |  |
|  | Face à l’intransigeance observée chez les représentants des syndicats, des associations ont été interdites hier. Ainsi donc, les travaux du Comité interministériel ad hoc chargé d’examiner et de proposer des solutions aux préoccupations soulevées par les syndicats des enseignants anglophones sont achevés, comme l’indique le communiqué de presse rendu public avant-hier par son président, le Pr. Ghogomu Paul Mingo. Même si ce dernier rappelle la « détermination du gouvernement à poursuivre le dialogue sur les questions relatives à l’amélioration du système éducatif camerounais (sous-systèmes anglophone et francophone), ceci dans le cadre de l’instance statutaire créée à cet effet par le Premier ministre le 8 novembre 2016. Pour l’ensemble de l’opinion camerounaise, l’heure est aujourd’hui au respect des différents engagements des parties pour permettre une reprise sereine des classes dans ces deux régions. Les cours ici ayant été interrompus depuis la fin du mois de novembre 2016. L’on peut déjà signaler ici que le | | | | | | | | | | | | | | | |  |
|  |  |
|  |  | | | | | | | | | | | | | | | |  |
|  | | | | | | | | | | | | 8 |  | CP |  | 1/21/2023 2:21 AM |  |
|  | Mezam Senior Divisional Officer inspires business community to ignore ghost town Inhabitants of Bamenda and its neighbourhoods woke up to another ghost town experience on Monday, January 30, 2017 with shops and markets shut, taxis and commercial motorcycles were off the streets. A few courageous commercial bikes riders that ignored the ghost town were quick to retire into the quarters following reports of threats and assaults on their colleagues in some parts of the city. The day was similar to previous ghost town days with most inhabitants remaining indoors while others trekked to respect appointments. Inhabitants appear at a loss how soon the ghost town calls will be history. | | | | | | | | | | | | | | | |  |
|  |  | | | | | | | | | | | | | | | |  |
| Reports\\Coding Summary By Node Report | | | | | | | | | | Page 7 of 140 | | | | | | | |
| 1/21/2023 3:37 PM | | | | | | | | | | | | | | | | | |
|  | | | **Aggregate** |  | **Classification** |  | **Coverage** |  | **Number Of Coding References** | |  | **Reference Number** |  | **Coded By Initials** |  | **Modified On** |  |
|  | | | | | | | | | | | | | | | | | |
|  | | | | | | | | | | | | 9 |  | CP |  | 1/21/2023 2:23 AM |  |
|  | There were more bikes and private cars on the streets on day two of ghost town, Tuesday January, 31, 2017 Day two of the ghost town on Tuesday January 31, 2017 featured a major development with more commercial motorcycles on the streets of Bamenda. Some courageous commercial motorcycle riders decided to defy the ghost town as they criss-crossed the streets charging more than the normal FCFA 200 per drop. They were conspicuous around Finance Junction, Mobile Nkwen and Commercial Avenue. Equally visible on the streets were few clandestine vehicles transporting passengers from Finance Junction towards Mbouda, Bafoussam and Dschang in the West Region. | | | | | | | | | | | | | | | |  |
|  |  | | | | | | | | | | | | | | | |  |
|  | | | | | | | | | | | | 10 |  | CP |  | 1/21/2023 2:29 AM |  |
|  | “Channels of Dialogue Have Opened” Barrister Harmony Bobga, Common Law Lawyers leader. “The channels for dialogue have opened after we met the Prime Minister, Head of Government in Bamenda. Nothing concrete emerged from the consultations beyond the opening of a window of opportunities for dialogue to prevail. It is on this account that the Common Law Lawyers strike action continues while we have been directed to open up to an enlarged meeting with the Minister of State, Minister of Justice. We will be signing a Memo with the Prime Minister to include a request for the meeting with the Minister of Justice. We hope that the government will have the same open mindedness as we have | | | | | | | | | | | | | | | |  |
|  |  | | | | | | | | | | | | | | | |  |
|  | | | | | | | | | | | | 11 |  | CP |  | 1/21/2023 2:35 AM |  |
|  | L’intégralité du propos liminaire du ministre de la Communication lors de son point de presse vendredi dernier à Yaoundé. « Mesdames, messieurs les journalistes Je vous souhaite à toutes et à tous une chaleureuse bienvenue à l’occasion de cet échange auquel je vous ai conviés, afin que nous débattions d’une actualité de la plus haute importance. En effet, le Département d’État américain vient de publier un communiqué de presse faisant état d’atteintes diverses aux libertés fondamentales au Cameroun, notamment dans la gestion des manifestations à Bamenda et à Buea. Dans le souci d’une information exacte de l’opinion publique nationale et internationale sur les allégations y contenues, le Gouvernement camerounais tient à rétablir la vérité sur certains faits. S’agissant de l’action des pouvoirs publics dans le cadre de la gestion des récentes manifestations survenues à Bamenda et à Buea, le Gouvernement s’est attelé à maintenir le dialogue et la concertation, dans le but de trouver des solutions appropriées aux revendications des avocats et des enseignants d’expression anglaise. Sous ce registre, des mesures appropriées ont été prises, en l’occurrence : - la visite de travail à Bamenda du Premier ministre, Chef du gouvernement, du 25 au 27 novembre 2016, à l’effet de discuter avec les représentants des avocats et des enseignants; - la création, par le Premier ministre, Chef du gouvernement, d’un comité interministériel chargé d’examiner les problèmes des enseignants ; - l’ouverture des négociations sectorielles, à la diligence respective du Ministre d’État, ministre | | | | | | | | | | | | | | | |  |
|  |  |
|  |  | | | | | | | | | | | | | | | |  |
|  | | | | | | | | | | | | 12 |  | CP |  | 1/21/2023 2:40 AM |  |
|  | Below is the introductory statement of the Minister of Communication, Issa Tchiroma Bakary during a press conference on December 2, 2016 in Yaounde. Distinguished Journalists, Ladies and Gentlemen, I wish you all a warm welcome to this exchange on an issue of utmost importance. As a matter of fact, the U.S. Department of State has just published a Press Statement alleging infringement on fundamental freedoms in Cameroon, notably in the management of demonstrations in Bamenda and Buea. In a bid to avoid any controversy on the allegations contained in the press statement and in order to enlighten national and international community, the Government of Cameroon would like to draw attention on some issues. With regard to the action of Public Authorities in the management of recent demonstrations which took place in Bamenda and Buea, the Government has made efforts to maintain dialogue and cohesion, to seek appropriate solutions to the grievances | | | | | | | | | | | | | | | |  |
|  |  |
|  |  | | | | | | | | | | | | | | | |  |
|  | | | | | | | | | | | | 13 |  | CP |  | 1/21/2023 2:42 AM |  |
|  | Security forces dislodge some youths preventing shops, Commercial Motorcycle riders from activities in Bamenda. Bamenda ended Monday December 5, 2016 in calm after some clashes that pitted security forces and some unidentified youths who attempted to prevent shops and commercial motorcycle riders from regular activities. The population was gripped by fear of a strike action allegedly called by traders, taxi drivers and commercial motorcycle riders. Tracts circulated over the weekend announcing the strike in solidarity with striking lawyers and teachers. That is perhaps, why many shops remained shot while very few taxis and commercial motorcycles circulated early in the morning. By midday, virtually all the streets were empty with only private cars and some commercial motorcycles circulating while security forces had some running battles with some youths who attempted to erect barricades on | | | | | | | | | | | | | | | |  |
|  |  |
|  |  | | | | | | | | | | | | | | | |  |
|  | | | | | | | | | | | | 14 |  | CP |  | 1/21/2023 3:01 AM |  |
|  | Les événements violents enregistrés la semaine dernière à Bamenda ont laissé apparaître que les instigateurs agissent à visages couverts prêts à sacrifier sans ménagement une année scolaire. Le 8 décembre dernier, les mouvements d’humeur qui secouent les villes de Buea et de Bamenda ont atteint un pic dans cette dernière localité avec des actes qui continuent d’être dénoncés. Les manifestations observées depuis quelques semaines semblent remettre au goût du jour une actualité vécue dans notre pays au début des années 1990. Une horde de manifestants qui descendent dans la rue, alors même que leurs commanditaires continuent de tirer les ficelles dans l’ombre. Ceci dans le but de déstabiliser les institutions de la République. | | | | | | | | | | | | | | | |  |
|  |  | | | | | | | | | | | | | | | |  |
|  | | | | | | | | | | | | | | | | | |
| Reports\\Coding Summary By Node Report | | | | | | | | | | Page 8 of 140 | | | | | | | |
| 1/21/2023 3:37 PM | | | | | | | | | | | | | | | | | |
|  | | | **Aggregate** |  | **Classification** |  | **Coverage** |  | **Number Of Coding References** | |  | **Reference Number** |  | **Coded By Initials** |  | **Modified On** |  |
|  | | | | | | | | | | | | | | | | | |
|  | | | | | | | | | | | | 15 |  | CP |  | 1/21/2023 3:03 AM |  |
|  | Le parti politique a tenu une conférence de presse mercredi à Douala sur la situation dans les régions du NordOuest et Sud-Ouest. «Le Manidem est scandalisé par l’acte qui consiste à brûler le drapeau de notre pays et considère que cette action délibérée des activistes de la division du pays est une véritable injure au sacrifice suprême consenti par les patriotes des deux bords pour l’unité du pays et au peuple kamerunais, qui dans son écrasante majorité, rejette la partition du Kamerun. » Cette position du Mouvement africain pour la nouvelle Indépendance et la Démocratie (Manidem) a été partagée avec les médias ce 14 décembre 2016, lors d’une conférence de presse à son siège de Douala. Une rencontre qui portait sur la situation actuelle dans les régions du Nord-Ouest et Sud-Ouest. Il était question pour ce parti politique de donner ses propositions sur la sortie de crise. Ainsi donc, le Manidem « exige la mise sur pied rapide d’une commission d’enquête indépendante qui doit en même temps faire la lumière sur les violences des forces de l’ordre et leurs commanditaires, mais également trouver les auteurs et les commanditaires de l’attaque incendiaire | | | | | | | | | | | | | | | |  |
|  |  |
|  |  | | | | | | | | | | | | | | | |  |
|  | | | | | | | | | | | | 16 |  | CP |  | 1/21/2023 3:39 AM |  |
|  | A few tabloids had predicted a showdown between government representatives and those of the English-speaking teachers’ trade unions before the two sides began their meeting in Bamenda last Tuesday. Everything seemed to have countered that feeling until what can be considered a detail came to spoil the soup as it were. The strenuous effort to bring together four members of government and representatives of the teachers under one roof for a fruitful discussion suddenly became complicated when some of the trade unionists put up a new conditionality: participation of their colleagues from the South-West, release of “kidnapped and detained children” following the recent violence in Bamenda. | | | | | | | | | | | | | | | |  |
|  |  | | | | | | | | | | | | | | | |  |
|  | | | | | | | | | | | | 17 |  | CP |  | 1/21/2023 3:43 AM |  |
|  | Face à l’intransigeance observée chez les représentants des syndicats, des associations ont été interdites hier. Ainsi donc, les travaux du Comité interministériel ad hoc chargé d’examiner et de proposer des solutions aux préoccupations soulevées par les syndicats des enseignants anglophones sont achevés, comme l’indique le communiqué de presse rendu public avant-hier par son président, le Pr. Ghogomu Paul Mingo. Même si ce dernier rappelle la « détermination du gouvernement à poursuivre le dialogue sur les questions relatives à l’amélioration du système éducatif camerounais (sous-systèmes anglophone et francophone), ceci dans le cadre de l’instance statutaire créée à cet effet par le Premier ministre le 8 novembre 2016. Pour l’ensemble de l’opinion camerounaise, l’heure est aujourd’hui au respect des différents engagements des parties pour permettre une reprise sereine des classes dans ces deux régions. Les cours ici ayant été interrompus depuis la fin du mois de novembre 2016. L’on peut déjà signaler ici que le gouvernement n’a pas attendu la fin des travaux, survenue tard dans la nuit de vendredi à samedi dernier pour commencer à lâcher du lest. L’on peut signaler l’annonce du recrutement spécial de 1 000 enseignants bilingues, l’intégration | | | | | | | | | | | | | | | |  |
|  |  |
|  |  | | | | | | | | | | | | | | | |  |
|  | | | | | | | | | | | | 18 |  | CP |  | 1/21/2023 3:48 AM |  |
|  | Schools are expected to begin full-fledged today in the Region following a fiery elite forum in Buea last Thursday A meeting convened by Senator Peter Mafany Musonge, CPDM political leader for the South West Region, Senator and Grand Chancellor of National Orders, 2 February, 2017, has resolved to steer clear from what they termed “separatists and two-state federalists”. Invited to attend the forum, held in the premises of Mountain Hotel Buea, were the cream of the Region including MPs, Mayors, traditional rulers, political leaders, trade unions, vocational and civil society organisations, elite ranking from Director level, the South West Teachers’ Association, South West lawyers and members of government from the area. The meeting, witnessed by the South West Governor, Bernard Okalia Bilai, acknowledged the efforts | | | | | | | | | | | | | | | |  |
|  |  | | | | | | | | | | | | | | | |  |
|  | | | | | | | | | | | | 19 |  | CP |  | 1/21/2023 3:49 AM |  |
|  | Le président du Comité ad hoc chargé de proposer des solutions aux problèmes des syndicats anglophones, le Pr. Ghogomu Paul Mingo, était face à la presse lundi à Yaoundé. A l’issue de ces échanges, l’on retient que l’instance créée par le Premier ministre, chef du gouvernement, le 26 novembre 2016, s’est profondément penchée sur ses missions. En effet, né au plus fort de la grève lancée le 21 novembre 2016 par les enseignants du sous-système anglophone, ce comité a engagé un dialogue franc avec les responsables des syndicats. Ce qui a abouti à la levée du mot d’ordre de grève le vendredi 4 février dernier. Ce dénouement peut s’expliquer par des actions vigoureuses déjà prises par le chef de l’Etat, pour résoudre les problèmes posés par ces syndicats | | | | | | | | | | | | | | | |  |
|  |  | | | | | | | | | | | | | | | |  |
|  | | | | | | | | | | | | 20 |  | CP |  | 1/21/2023 4:09 AM |  |
|  | Administrative, traditional and religious authorities are on their heels to discourage manifestations over the weekend. The South West Region has been put on guard against secessionists threats announced on social media for October 1 in Anglophone Cameroon. The situation is even more worrisome owing to last September 22, 2017 protest marches staged with surgical success in the Regional capital, Buea, and numerous other major centres of the Region. To assuage possible escalations proactively, Governor Bernard Okalia Bilai has dished out messages of peace and safeguard to all citizens of good faith, good morals and non-violence, to protect their children from joining any attempts at violence this weekend. From 30th September to October 2, public manifestations are forbidden. “Let youngsters stay at home or at school where they are supposed to be”, Okalia Bilai has said. Elsewhere | | | | | | | | | | | | | | | |  |
|  |  |
|  |  | | | | | | | | | | | | | | | |  |
|  | | | | | | | | | | | | | | | | | |
| Reports\\Coding Summary By Node Report | | | | | | | | | | Page 9 of 140 | | | | | | | |
| 1/21/2023 3:37 PM | | | | | | | | | | | | | | | | | |
|  | | | **Aggregate** |  | **Classification** |  | **Coverage** |  | **Number Of Coding References** | |  | **Reference Number** |  | **Coded By Initials** |  | **Modified On** |  |
|  | | | | | | | | | | | | | | | | | |
|  | | | | | | | | | | | | 21 |  | CP |  | 1/21/2023 4:16 AM |  |
|  | “Here is an introductory statement of Communication Minister, Issa Tchiroma Bakary during October 24, 2017 press conference in Yaounde. Distinguished Journalists, Ladies and Gentlemen, I am highly delighted and honored to wish you a warm welcome to this meeting to which I have invited you for us to dwell on the latest report of the "International Crisis Group", on the crisis prevailing in the North-West and South-West Regions. As you may have noticed, the International Crisis Group has, in the space of just two months, published two reports condemning the Cameroonian Government, on the situation I have just mentioned. The most recent of these two reports, dated October 19, 2017, contains ungrounded allegations of such gravity that the Government could not remain speechless in the face of such vexing aggression. The Government therefore strongly refutes all these allegations and totally rejects both the report of the International Crisis Group of 2nd August 2017 and that published on 19 October | | | | | | | | | | | | | | | |  |
|  |  |
|  |  | | | | | | | | | | | | | | | |  |
|  | | | | | | | | | | | | 22 |  | CP |  | 1/21/2023 4:17 AM |  |
|  | Avec la crise socio-politique qui secoue, depuis un certain temps, les régions du Nord- Ouest et du Sud-Ouest, le rôle de la presse fait à nouveau débat. Attiser les tensions ou apaiser les esprits : quelle doit être sa mission première ? Que doit-on attendre d’elle dans un contexte de crise quasi insurrectionnelle où des voix s’élèvent pour appeler à plus de… responsabilité ? Le questionnement occupe voire préoccupe les cercles des observateurs avertis de la pratique journalistique, en temps de crise. Ce questionnement n’est pas nouveau. Loin s’en faut ! A la vérité, il est consubstantiel aux situations de crise. Ici comme ailleurs, il fait l’objet de vifs échanges, chaque fois qu’un pays est confronté à des tensions sociopolitiques susceptibles de destructurer le tissu social. Enregistré au cours du dernier quart de siècle, le cas du Rwanda, pays africain frère, hante encore la mémoire collective. Tristement célèbre est restée la « Radio des Mille Collines » dont le rôle incitateur avait conduit en 1994, à un véritable génocide. Près d’un million de morts déclarés en l’espace de quatre mois ! Autour de nous, les exemples sont légion, qui peuvent illustrer « les dangers d’une presse sans foi ni loi » dans un contexte de crise à l’instar de celle que traverse notre pays. Prévenir valant mieux que guérir, le Ministre | | | | | | | | | | | | | | | |  |
|  |  |
|  |  | | | | | | | | | | | | | | | |  |
|  | | | | | | | | | | | | 23 |  | CP |  | 1/21/2023 4:27 AM |  |
|  | They made the decision on Saturday July 13, 2019, at the premises of the Sub Divisional Office in Kumba III. Some 7,000 commercial motor riders in Kumba have vowed that there will be no more ghost town in Kumba on Mondays as proclaimed and enforced by the separatist groups in the North West and South West Regions. The motorbike riders stormed the streets of the city of Kumba, headquarters of Meme Division, on Saturday morning (13 July, 2019) protesting against the killing of one of theirs by suspected separatists fighters in Fiango (Kumba II SubDivision). They decried that over 200 commercial motorbikes had been seized by members of suspected separatist groups in the town without any reaction from the riders. According to one of the riders, Ngu Thomas, who spoke to C.T., suspected members of the group on Friday July 12, at about 9pm stopped one of the riders whose only nick name we got as “Fashion” and asked him to hand his bike to them. The 19-year-old Fashion refused. As he was struggling with them, one of the armed men pulled out a locally fabricated gun | | | | | | | | | | | | | | | |  |
|  |  |
|  |  | | | | | | | | | | | | | | | |  |
|  | | | | | | | | | | | | 24 |  | CP |  | 1/21/2023 4:35 AM |  |
|  | 5th Joint Military and Gendarmerie Commanders size up operation, congratulates soldiers for dislodging armed fighters from Saddle Hill touristic base in Bafut subdivision. The Commanders of the 5th Joint Military and Gendarmerie Region, Brigadier Generals, Nka Valerie and Ekongwesse Divine on May 1st, 2020 went cheering Defence and Security Forces in Bafut who dislodged armed fighters who had turned the Saddle Hill touristic facility into a base from where they launched attacks and kidnapped citizens in the neighbourhoods of Mezam Division. The six -day field operation led by Col. Matian Charles Alain covered the Bafut neighbourhoods of Manka Nikong, Nsani, Agyati, Mankwi etc. In all, the 5th Joint Military and Gendarmerie Commanders were presented arms and amunition, motorcycles, a Fortuna Toyota SUV car, two horses. It emerged from the operation's team leader Col. Matian Charles Alain that some 15 armed fighters were neutralized. | | | | | | | | | | | | | | | |  |
|  |  |
|  |  | | | | | | | | | | | | | | | |  |
|  | | | | | | | | | | | | 25 |  | CP |  | 1/21/2023 4:36 AM |  |
|  | A special operation by the 5th Joint Military and Gendarmerie Region, neutralise alleged armed fighters, recovers killer weapons in Boyo division. It took the "Boyo I special operation” six days with Col. Matiang Charles Alain leading some 450 elements of the defense and security forces. The Commanders of the 5th Joint Military and Gendarmerie Region, Brigadier General Nka Valere and Ekongwesse Divine went sizing up the operation in Fundong, capital of Boyo division on August 30,2020. It emerged from the visit that some 17 alleged separatist fighters were neutralised, seven others captured alive and several alleged enemy camps were destroyed. The operation took the forces to the neighbourhoods of Abuh, Anyajua, Aboh, Elemighong, Mbueni, Ngwah, and Asuh. Col. Matiang Charles Alain told the visiting Generals that the operation recovered from the enemy camps, some dangerous weapons like guns and gas cylinders. Among the lot recovered were also motorcycles, phones, sewing machines and combat outfits used by the fighters. On-the-spot, Brigadier Generals Nka Valere and Ekongwesse Divine hailed the forces who braved the difficult terrain of Boyo for a mission that was conceived | | | | | | | | | | | | | | | |  |
|  |  |
|  |  | | | | | | | | | | | | | | | |  |
|  | | | | | | | | | | | | | | | | | |
| Reports\\Coding Summary By Node Report | | | | | | | | | | Page 10 of 140 | | | | | | | |
| 1/21/2023 3:37 PM | | | | | | | | | | | | | | | | | |
|  | | | **Aggregate** |  | **Classification** |  | **Coverage** |  | **Number Of Coding References** | |  | **Reference Number** |  | **Coded By Initials** |  | **Modified On** |  |
|  | | | **Internals\\Eden Newspaper** | | | | | | | | | | | | | |  |
| No |  |  |  | 0.0107 |  | 7 | |  | | | | | |
|  | | |  |  |  |  |  |  |  | |  | | | | | | |
|  | | | | | | | | | | | | 1 |  | CP |  | 12/11/2022 12:08 AM |  |
|  | So was the SDF, from the word go treading on the path to “Suffer Dey Front” as charged by its opponents led by the CPDM? Professor Tazoacha Asonganyi gives us a clue to what was gnawing and bedeviling the party and leading it towards a vindication of the CPDM charge when he writes in his “The SDF Crisis”, that “some operations are fated to go wrong from the start. The SDF birth was facilitated by persons who later branded themselves ‘founding fathers’. By the constitution they helped to write, they were supposed to play a central role in nurturing of the “baby” they had helped to deliver. But the baby belonged to society; it was not theirs. They were midwives,… their hour on stage had to be short and fretful … the birth of the SDF was supposed to cause their disappearance … from the stage. Unfortunately, instead of vacating the stage… the | | | | | | | | | | | | | | | |  |
|  |  |
|  |  | | | | | | | | | | | | | | | |  |
|  | | | | | | | | | | | | 2 |  | CP |  | 12/11/2022 12:09 AM |  |
|  | Henceforth no French language shall feature in Common Law courts in the North West and South West Regions given a consensus meeting that took place in Bamenda on Tuesday 14 March between Common Law lawyers, the Attorney General of the Region, Bar Council President, Ngnie Kamga and General Assembly President, Ntumfor Barrister Nico Halle. | | | | | | | | | | | | | | | |  |
|  |  | | | | | | | | | | | | | | | |  |
|  | | | | | | | | | | | | 3 |  | CP |  | 12/11/2022 12:12 AM |  |
|  | The recent reaction comes from Chairman John Fru Ndi of the Social Democratic Front, SDF. He lambasted the action of vandalism coordinated and supervised by House Speaker Cavaye Yegui Djibril who put in flames gadgets and properties of CRM in his ( Cavaye) region of origin.  According to SDF Chairman, he is surprised that this unfathomable action is being masterminded by such a respectable personality in the country. He wonders aloud that this is a person who by prerogative of his office as House speaker at the time there was no Senate, he would have been Head State in case of vacancy at the helm. | | | | | | | | | | | | | | | |  |
|  |  | | | | | | | | | | | | | | | |  |
|  | | | | | | | | | | | | 4 |  | CP |  | 12/11/2022 12:56 AM |  |
|  | While the Ambazonia separatist fighters have been targeting anybody whom they consider to be “blacklegs” or “traitors” of their independence armed struggle, the government, on its part, has stepped up crackdown on all those suspected to be activists or sympathisers to the Anglophone cause. | | | | | | | | | | | | | | | |  |
|  |  | | | | | | | | | | | | | | | |  |
|  | | | | | | | | | | | | 5 |  | CP |  | 12/11/2022 1:00 AM |  |
|  | In the interregnum, we continue to kill ourselves, ruin our institutions  and our economy.  Lives and livelihood options are being wasted as the Ambas would say. Why do the oppressed hate themselves  more than the opressor? There is a sociological explanation for this. | | | | | | | | | | | | | | | |  |
|  |  | | | | | | | | | | | | | | | |  |
|  | | | | | | | | | | | | 6 |  | CP |  | 12/11/2022 1:04 AM |  |
|  | A combine military contingent comprising of elements of BTAP, ESIR and BIR have launched deadly attacks on Ekona some 10 kilometres in the outskirts of Buea.  The attack, which was aimed at dislodging an Amba camp, also saw the shooting and killing of innocent civilians many of whom were women and children. Sources say that the combine operation started at 4 am and went on for a few hours. | | | | | | | | | | | | | | | |  |
|  |  | | | | | | | | | | | | | | | |  |
|  | | | | | | | | | | | | 7 |  | CP |  | 12/11/2022 1:07 AM |  |
|  | The Social Democratic Front, SDF, has accused state security operatives of attempting to kill its National Chairman, Ni John Fru Ndi. The leading opposition party said several life bullets were fired into Fru Ndi’s Bamenda residence last Wednesday.  “This constitutes a clear attempt on his [Ni John Fru Ndi] life and that of his | | | | | | | | | | | | | | | |  |
|  |  | | | | | | | | | | | | | | | |  |
|  | | | **Internals\\La voix du centre** | | | | | | | | | | | | | |  |
| No |  |  |  | 0.0179 |  | 6 | |  | | | | | |
|  | | |  |  |  |  |  |  |  | |  | | | | | | |
|  | | | | | | | | | | | | 1 |  | CP |  | 12/11/2022 3:02 AM |  |
|  | Les Bretons, c’est la mafia française ». Jean-Yves Le Drian, originaire de la Bretagne, a-t-il apprécié cette blague d’Emmanuel Macron devant le Saint-Père au Vatican ? Difficile à dire, mais une chose est sûre : elle a fait moucharder à gauche. Cette mauvaise blague n’a heureusement pas entamé la relation de confiance que le président français entretient avec son inamovible ministre des Affaires étrangères et de l’Europe. Ce dernier garde donc son rôle d’« éclaireur » attitré du locataire de l’Elysée sur le continent, où Paris a à cœur d’apaiser certaines tensions diplomatiques. | | | | | | | | | | | | | | | |  |
|  |  | | | | | | | | | | | | | | | |  |
| Reports\\Coding Summary By Node Report | | | | | | | | | | Page 11 of 140 | | | | | | | |
| 1/21/2023 3:37 PM | | | | | | | | | | | | | | | | | |
|  | | | **Aggregate** |  | **Classification** |  | **Coverage** |  | **Number Of Coding References** | |  | **Reference Number** |  | **Coded By Initials** |  | **Modified On** |  |
|  | | | | | | | | | | | | | | | | | |
|  | | | | | | | | | | | | 2 |  | CP |  | 12/11/2022 3:10 AM |  |
|  | 30 mai 2018  La région du Nord-ouest a été le théâtre des affrontements entre armée et sécessionnistes tout au long du week-end dernier.  Le bilan s’alourdit dans ce que l’on surnomme désormais « crise anglophone ». Le 25 mai 2018, 22 personnes ont été tuées lors d’un affrontement entre l’armée et groupe de sécessionniste à Menka dans la région du Nord-ouest. L’information publiée par l’Agence France Presse (AFP) a été donnée par l’honorable Nji Tumasang, député du parti du Social Democratic Front (SDF) de Santa, l’arrondissement où se trouve ladite localité. L’incident s’est produit dans un hôtel de la ville où après avoir été alertée, l’armée est intervenue et il ya eu échanges de tirs et par la suite la neutralisation de plusieurs terroristes. Interrogée sur les faits, la population a reconnu avoir été témoin des échanges de tirs mais elle ne saurait dire s’il s’agissait des criminels ou des sécessionnistes qui ont l’habitude de le faire. Le lendemain des faits, Ni John Fru Ndi, président du SDF accompagné d’une délégation s’est rendu sur les lieux question de témoigner des faits. Pour le député du SDF « trois autres personnes, dont une soupçonnée d’appartenir au groupe de l’hôtel et un conducteur de mototaxi, ont été arrêtées dans un hôpital d’une localité voisine et exécutées par des soldats ». L’AFP rapporte également qu’il a avait que « d’après des «familles» du village, 18 personnes avaient été tuées à Menka. Un témoin oculaire avait lui indiqué que huit corps d’hommes jeunes avaient été découverts ». | | | | | | | | | | | | | | | |  |
|  |  |
|  |  | | | | | | | | | | | | | | | |  |
|  | | | | | | | | | | | | 3 |  | CP |  | 12/11/2022 3:16 AM |  |
|  | Wilfried Tassang prisonnier anglophone et proche de Sissuku Ayuk Tabe est très amer envers Maurice Kamto. Dans une tribune qu’il a publié derrière les murs de Kondengui, le leader sécessionniste traite Maurice Kamto de menteur.  « 48 heures après leur libération de Kondengui, le partenaire et allié du professeur, Albert Dzongang, a déclaré à la télévision que la meilleure chose qui leur soit arrivée en prison était qu’ils avaient établi un rapprochement avec les dirigeants ambazoniens en prison, quoi que cela signifie.  Aurait-il pu y avoir un rapprochement si les deux parties ne se rencontraient pas et ne se parlaient pas ?  N’est-il donc pas très peu formel que Kamto déclare que lui et son équipe n’ont jamais discuté avec les dirigeants ambazoniens en détention ? Pourquoi mentirait-il ? » se demande-t-il. Wlfried Tassang rappelle parlant de Maurice Kamto que « le professeur a menti » et dit aux anglophones de la diaspora « que cet homme (Kamto) est à éviter comme une puce ».  Wilfried Tassang | | | | | | | | | | | | | | | |  |
|  |  |
|  |  | | | | | | | | | | | | | | | |  |
|  | | | | | | | | | | | | 4 |  | CP |  | 12/11/2022 3:22 AM |  |
|  | Une source qui préfère resté anonyme pour des raisons de sécurité nous fait part de certains faits. D’après elle le gouvernement Camerounais serait entrain de perdre la guerre sur le front contre les sécessionnistes et aurait pris d’autres mesures pour vaincre l’ADF, Red Dragons et tout autre groupe sécessionniste dans les régions du Nord-Ouest et Sud-Ouest.  Cette source nous informe que certains militaires et individus sont payés pour commettre et masquer des crimes afin de faire porter le chapeau aux Amazoniens | | | | | | | | | | | | | | | |  |
|  |  | | | | | | | | | | | | | | | |  |
|  | | | | | | | | | | | | 5 |  | CP |  | 12/11/2022 3:30 AM |  |
|  | Les autorités camerounaises qui apprécient la démarche ont fait savoir qu’il n’est pas judicieux de poser les préalables à l’Etat lors d’une telle concertation. « Le dialogue, OUI. Mais il ne faudrait pas que le remède soit pire que la maladie. Le gouvernement reste ouvert à toutes les initiatives », souligne Issa Tchiroma Bakary, le ministre de la Communication et porte-parole du gouvernement. | | | | | | | | | | | | | | | |  |
|  |  | | | | | | | | | | | | | | | |  |
|  | | | | | | | | | | | | 6 |  | CP |  | 12/11/2022 3:31 AM |  |
|  | Le ministre de la Communication en porte-parole en chef du Gouvernement  Si l’objectif  visé à terme est partagé par les deux parties à savoir le retour à la paix dans les régions du Sud-ouest et du Nord-ouest, la question sur la libération des personnes incarcérées dans cette crise divise les chefs religieux et le gouvernement camerounais.  Le 25 juillet dernier, Christian Tumi | | | | | | | | | | | | | | | |  |
|  |  | | | | | | | | | | | | | | | |  |
|  | | | **Internals\\the post newspaper** | | | | | | | | | | | | | |  |
| No |  |  |  | 0.0085 |  | 4 | |  | | | | | |
|  | | |  |  |  |  |  |  |  | |  | | | | | | |
|  | | | | | | | | | | | | 1 |  | CP |  | 12/11/2022 10:44 PM |  |
|  | Given the seriousness of violence reports against Cameroonians in the Western part of the country, we have asked for access to these persons to be able to verify allegations made against both security forces and armed elements… We will now need to explore other options, including remote monitoring…,” Zeid asserted. | | | | | | | | | | | | | | | |  |
|  |  | | | | | | | | | | | | | | | |  |
|  | | | | | | | | | | | | 2 |  | CP |  | 12/11/2022 11:20 PM |  |
|  | The Government of Cameroon is beginning to come to terms with the painful reality that its policy of trying to put the ‘cart before the horse’ in its reconstruct drive of the war-ravaged Northwest and Southwest Regions cannot work.  “We are all aware that the Head of State has put in place the National Committee for the restructuring of the two Regions. That Committee cannot effectively work if we do not enjoy total peace.”  These were the words of Hon. Emilia | | | | | | | | | | | | | | | |  |
|  |  | | | | | | | | | | | | | | | |  |
| Reports\\Coding Summary By Node Report | | | | | | | | | | Page 12 of 140 | | | | | | | |
| 1/21/2023 3:37 PM | | | | | | | | | | | | | | | | | |
|  | | | **Aggregate** |  | **Classification** |  | **Coverage** |  | **Number Of Coding References** | |  | **Reference Number** |  | **Coded By Initials** |  | **Modified On** |  |
|  | | | | | | | | | | | | | | | | | |
|  | | | | | | | | | | | | 3 |  | CP |  | 12/11/2022 11:47 PM |  |
|  | The deteriorating security situation in the Northwest Region and numerous threats from the Ambazonia Defence Forces, ADF, have forced Northwest CPDM elite to ban campaign rallies in the Region ahead of the October 7 Presidential election.  The decision was adopted at a CPDM meeting at Ayaba Hotel in Bamenda on Saturday, August 18, 2018, chaired by the CPDM Northwest Regional Coordinator, who is also the Prime Minister, Philemon Yang.  The meeting was attended by external and internal Northwest CPDM elites, including CPDM Divisional Coordinators and Section Presidents.  The meeting held within the backdrop of scaring reports of surging cases of | | | | | | | | | | | | | | | |  |
|  |  | | | | | | | | | | | | | | | |  |
|  | | | | | | | | | | | | 4 |  | CP |  | 12/11/2022 11:58 PM |  |
|  | The document further states: “It is therefore clear that the electoral hold-up continues and intends to be reinforced. We are, therefore, obliged to maintain and accentuate the National Resistance, in the forms and methods that will be communicated later. As a result, we urge CRM activists and supporters as well as all Cameroonians concerned about the future of our country to remain mobilised.” | | | | | | | | | | | | | | | |  |
|  |  | | | | | | | | | | | | | | | |  |
|  | | | **Internals\\the sun newspaper** | | | | | | | | | | | | | |  |
| No |  |  |  | 0.0394 |  | 18 | |  | | | | | |
|  | | |  |  |  |  |  |  |  | |  | | | | | | |
|  | | | | | | | | | | | | 1 |  | CP |  | 12/3/2022 4:51 PM |  |
|  | Government Spokesman and Communication Minister, Issa Tchiroma Bakary has revealed that the government has declared war against “terrorists” in the two Anglophone regions following the killing of three gendarmes in the North West and one in the South West regions.  Minister Tchiroma narrated that all started last November 6, 2017 when Gendarme-major DJONLAY Bienvenu was ambushed and then cold-bloodedly executed by criminals in Jakiri as he, at the request of the Principal of Jakiri Technical High School, came to disperse attackers who were on mission to expel teachers and students from the school campus.  According to Tchiroma, in less than 48 hours another terrorist attack happened on November 7, 2017 at the police-gendarme check point at Bafut when a hooded individual opened fire hitting Chief Warrant Officer, HINMA Dieudonné on the back, before disappearing into thin air. | | | | | | | | | | | | | | | |  |
|  |  |
|  |  | | | | | | | | | | | | | | | |  |
|  | | | | | | | | | | | | 2 |  | CP |  | 12/3/2022 9:34 PM |  |
|  | While separatists have since been on the throat of Akanji Martin Mbah for him to support their struggle, security forces crumbled his businesses through their arson attacks on villages in Anglophone Cameroon.  Homes, warehouses and shops have been razed down to ashes by soldiers battling separatist in Munyenge, Kwa-Kwa, KukeMboma, Bekora, and Bole in the South West Region, Barrister AgborNkongho has said. | | | | | | | | | | | | | | | |  |
|  |  | | | | | | | | | | | | | | | |  |
|  | | | | | | | | | | | | 3 |  | CP |  | 12/3/2022 11:12 PM |  |
|  | The Government of Cameroon has vehemently refuted accusations contained in the report of Human Rights Watch saying satellite images prove that Cameroon Defence Forces is responsible for “the murder of twenty-one civilians, including a woman and thirteen children, in an armed attack carried out on 14 February 2020 in the locality of Ngarbuh, Donga Mantung Division in the North -West Region.” | | | | | | | | | | | | | | | |  |
|  |  | | | | | | | | | | | | | | | |  |
|  | | | | | | | | | | | | | | | | | |
|  | | | | | | | | | | | | | | | | | |
|  | | | | | | | | | | | | | | | | | |
| Reports\\Coding Summary By Node Report | | | | | | | | | | Page 13 of 140 | | | | | | | |
| 1/21/2023 3:37 PM | | | | | | | | | | | | | | | | | |
|  | | | **Aggregate** |  | **Classification** |  | **Coverage** |  | **Number Of Coding References** | |  | **Reference Number** |  | **Coded By Initials** |  | **Modified On** |  |
|  | | | | | | | | | | | | | | | | | |
|  | | | | | | | | | | | | 4 |  | CP |  | 12/3/2022 11:19 PM |  |
|  | Deacon TASSANG Wilfred, in response to the disclaimer on Prof Maurice Kamto, by Ayuk Tabe and eight others currently serving jail terms in Yaounde, on 26th of Feb.2020 sent out a message maintaining his stance on what he thinks about the CRM leader.  “When I wrote to denounce Kamto and warn Ambazonia against his wiles, I little imagined that it was going to raise so much controversy and attract this much attention. Am I worried? Not the least. If anything, this will unite the struggle as it has acted as precursor to the unearthing of evil most viciously hidden.  I was never brought up to shy away from controversies; not at home, not in school and certainly not in my new love with Jesus the Christ.  Romans 12:2  And be not conformed to this world: but be ye transformed by the renewing of your mind, that ye may prove what is that good, and acceptable, and perfect, will of God. If the whole world chooses to lie, I will not, because I will not conform to evil. I am in fact having the season of my life since our abduction because at last, falsehood that had been so carefully hidden under a pretentious façade is being exposed.  I confess my love for you, Ambazonia. And what is it about my love for you?  1Cor.13:6 Love is not happy with evil, but is happy with the truth. GNB  The truth is so very Central to this liberation struggle. No Truth, no justice, no liberation. I’ll die for it.  I am sorry for sermonising. In this note, I will by the grace of God, denounce the falsehoods that have once more been declared in the wake of the Kamto denunciation. The very first one is contained in a note by someone reacting to Bro. Xmas Ebini’s reaction to the Disclaimer. See it attached and highlighted here below. I’ll take it along with another by my fellow inmate Kisob Bertin, who also goes by the pseudonyms; Pastor Amba, and General Chop No Die.  Perhaps I should open up to you a little!! The US embassy sent an official recently to meet our jailed leaders and to inform them of the American position on the crisis in Southern Cameroons!! Immediately the official said, we have asked Yaounde to discuss with your leader Sisiku Ayuk Tabe!! Tasang interrupted the speaker and shouted that they should negotiate instead with the leaders in the USA and cited Sako and Chris!! Put yourself in their place Seseskou Ebini, will you continue to keep someone like that around?  In the note above that ends with a very visible threat to my life, (not that it matters) the author who is by all means a friend of Nera10-1, affirms that I, Tassang Wilfred rudely interrupted a US diplomat that visited us in jail as you can see above, etc etc. In Kisob’s diatribe, he says Batonier Akere Muna was the one who visited. I think it will be a sin against Ambazonia and my God if this particular matter is not addressed forthwith. | | | | | | | | | | | | | | | |  |
|  |  |
|  |  |
|  |  |
|  |  | | | | | | | | | | | | | | | |  |
|  | | | | | | | | | | | | 5 |  | CP |  | 12/12/2022 1:40 AM |  |
|  | There seems to be a widening crack between those who are fighting for a federation and those who want to separate from the republic of Cameroon and restore what they term the independence of the former British Southern Cameroons.  The protagonists are growing more and more apart with respect to strategy and solutions to the ongoing crisis that has engulfed the North West and South West regions of the country for a little over a year now.  End to schools boycott  The rift became even more evident after one of the main protagonists of federalism, Barrister Nkongho Felix Agbor Balla | | | | | | | | | | | | | | | |  |
|  |  | | | | | | | | | | | | | | | |  |
|  | | | | | | | | | | | | 6 |  | CP |  | 12/12/2022 1:39 AM |  |
|  | The Social Democratic Front, SDF National Chairman aspirant and presidential hopeful, Felix Teche Nyamusa has challenged Ni John Fru Ndi, chairman of the SDF and his surrogates to cleanse the party which they have badly soiled.  Speaking to The SUN in a lengthy chat recently, Teche Nyamusa | | | | | | | | | | | | | | | |  |
|  |  | | | | | | | | | | | | | | | |  |
|  | | | | | | | | | | | | 7 |  | CP |  | 12/4/2022 3:23 PM |  |
|  | Things are no longer the same at both the Lower and Upper Houses of Cameroon Parliament as fireworks continue to multiply during the November 2017 ordinary session of Parliament traditionally dedicated to the examination and adoption of the state budget for the 2018 fiscal year.  For quite some time now, nearly all plenary sittings dedicated for general discussions on bills are pregnant with suspense as MPs of the leading opposition Social Democratic Front, SDF party continue with what they term Operation Block all deliberations until Anglophone problem is discussed in Parliament.  The operation went ugly in the night of 8 December 2017 as three UDC party MPs led by Hon Patricia Tomainou Ndam Njoya attempted in vain to be given the floor to speak in the House Chamber. Seemingly frustrated by the fact that the SDF standoff in Parliament prevented the Speaker, Hon Cavaye Yeguie Djibril from giving them the floor during general debate on the state budget in an angry mood, she mistakenly landed a name tag on the forehead of CPDM MP for Menchum South Constituency, Hon Wallang Richard provoking the oozing of blood.  Though she expressed remorse for her action through an excuse sms sent to Hon Wallang Richard, social media created a different scenario with the incident when some unscrupulous individuals posted claims that Hon Patricia Ndam Njoya intentionally hit Hon Wallang on his forehead with the name tag because he was opposing SDF MPs who had been insisting that the Anglophone crisis be discussed in Parliament before any other issue.  Such claims described as malicious have been refuted by the CPDM MP who did not utter any word in the House Chamber that evening.  SDF’s Operation Block all plenary sessions took a different twist last week as the party’s Senators introduced the fight in the Upper House of Parliament, thereby blocking a plenary sitting at the Senate chaired by the President, Marcel Niat Njifenji for over four hours. Deliberations only resumed after SDF Senators obliged Marcel Niat Njifenji to take an engagement to open up discussion on the Anglophone crisis in the next plenary.  SDF Senators however, promised to disrupt the voting of the state budget if the Senate President does not respect his engagement. | | | | | | | | | | | | | | | |  |
|  |  |
|  |  |
|  |  | | | | | | | | | | | | | | | |  |
| Reports\\Coding Summary By Node Report | | | | | | | | | | Page 14 of 140 | | | | | | | |
| 1/21/2023 3:37 PM | | | | | | | | | | | | | | | | | |
|  | | | **Aggregate** |  | **Classification** |  | **Coverage** |  | **Number Of Coding References** | |  | **Reference Number** |  | **Coded By Initials** |  | **Modified On** |  |
|  | | | | | | | | | | | | | | | | | |
|  | | | | | | | | | | | | 8 |  | CP |  | 12/4/2022 3:29 PM |  |
|  | Between Monday March 21 to Sunday April 1, clashes have been reported between the supposedly genuine Ambazonian fighters and the armed gangs who pass for Ambazonian fighters in Belo sub division. Though the alleged killing of the later by the former is reported, there have been similar activities of kidnap and demand for ransom by the supposedly genuine Amba soldiers. | | | | | | | | | | | | | | | |  |
|  |  | | | | | | | | | | | | | | | |  |
|  | | | | | | | | | | | | 9 |  | CP |  | 12/4/2022 3:31 PM |  |
|  | Gun exchanges between Cameroon’s defence forces and the Ambazonia fighters have been the order of the day, and this flared as councilors went to the polls on March 25 to vote senators.  Hundreds of troops have been stationed in Lebialem, in a bid to create a serene atmosphere, following recent attacks from the Ambazonia fighters.  However, this has met with stiff opposition, which heightened on Thursday March 22, when the Senior Divisional Officer’s convoy was attacked by the Ambazonian fighters. The SDO, Zakari Ungitoh was shot at, and the regional delegate of Lands killed on the spot, and others seriously wounded. Reports have it that the SDO is currently receiving treatment in Douala. | | | | | | | | | | | | | | | |  |
|  |  |
|  |  | | | | | | | | | | | | | | | |  |
|  | | | | | | | | | | | | 10 |  | CP |  | 12/4/2022 3:43 PM |  |
|  | The escalating crisis in the North West and South West regions of the country has shifted gears over the weekend with unending episodes of gun battles between gunmen believed to be separatist fighters and the military on multiple fronts.  These clashes were accentuated by brutal killings, lootings, burning of civilian homes as well as abductions. Civilians have been caught in the crossfire leading to untold suffering. Many are now internally displaced and have left their communities for the (dis)comfort of the bushes.  Munyenge and Bafia, both localities under Muyuka sub-division in Fako witnessed serious clashes over the weekend between separatists and the military. The population deserted the villages while the unfortunate ones were either caught by bullets or arrested by the military.  A particular case caught the attention of the public after a video surfaced on social media showing a helpless middle-aged man struggling on the ground with a leg that had apparently been shattered by bullets. The young man would be indentified as Michael Modika, a deaf and dump in Munyenge who was obviously oblivious of what was happening when he strayed into the path of military bullet.  Modika was trapped in the village as the military reportedly blocked all movements of cars and persons in and out of Munyenge-Muyuka.  Modika sadly had his leg amputated almost 48 hours later owing to the delayed medical attention to it as the leg was rotting off. He is now under very intensive medical care at a certain health unit in Kumba under the care and supervision of the Ayah Foundation-A foundation that has been coming to the aid of victims of the Anglophone crisis.  In Bafia, a locality close to Munyenge, some of the villagers who had fled into the forest after the military invasion returned to a scourged village. Several houses were set ablaze, reportedly by the military.  Another video surfaced over the weekend of what could be seen as military officers setting a house on fire in a locality that has now been identified as Azi in Lebialem.  Government is yet to make a statement regarding the video which many have quickly attributed to the Cameroon military which has been accused in the past of setting other villages on fire like in Kwa Kwa, Bole and other areas.  Separatists have also been accused in the past of setting public structures like schools, control posts and police stations ablaze.  Serious clashes were also reported in other areas like Wabane in Lebialem, Nyasoso in Kupe Muanenguba, Bekora near Lobe in Ndian in the South West region with casualties reportedly recorded on both sides.  In Bali, in the North West region, a military commander and a soldier were reportedly killed by armed men claiming to be separatists.  Reports which The SUN could not immediately verify suggests that the supposed separatists stole a goat and plantains belonging to a local. The person then reported the matter to security forces. When the military commander and another officer tried to intervene in the matter, they were reportedly ambushed and killed.  The man who reported the goat and plantain theft is said to have been arrested for further questioning meanwhile the killers are at large.  The incident forced the population of Bali to flee to other parts and into the bushes for fear of being victims of military reprisal.  In Kom, a Catholic priest, Principal of St. Bede’s college was reportedly abducted on Monday, April 30 when he was at mass with his students in Ashinkom.  St. Bede’s was the only college still effective in the area. The principal’s abduction has forced the lone operational school in the area to close as parents poured in after the news to collect their kids. | | | | | | | | | | | | | | | |  |
|  |  |
|  |  |
|  |  |
|  |  |
|  |  | | | | | | | | | | | | | | | |  |
|  | | | | | | | | | | | | 11 |  | CP |  | 12/4/2022 3:57 PM |  |
|  | Anti-riot police on Saturday arrested around 50 supporters of opposition figure Maurice Kamto during an unauthorised march in Douala, Kamto’s spokesperson said.  “Mass arrests of activists – Barrister Michele Ndoki and around 50 others – and of supporters demonstrating peacefully today,” the spokesperson, Olivier Bibou-Nissack, said in a Facebook post.  His boss Kamto has rejected the official outcome of this month’s presidential election, in which he was one of seven candidates seeking to unseat 85-year-old President Paul Biya who has ruled Cameroon for 36 years.  In the end, Kamto came second with 14.23% the vote, against 71.28% for Biya.  Michele Ndoki is one of his lawyers who protested before the Constitutional Council against what she called “massive and systematic fraud” during the election. The firebrand lawyer was pictured being forced into a gutter by baton-wielding police officers before being ferried along with others to the Judicial Police station in Bonanjo Douala. | | | | | | | | | | | | | | | |  |
|  |  |
|  |  | | | | | | | | | | | | | | | |  |
| Reports\\Coding Summary By Node Report | | | | | | | | | | Page 15 of 140 | | | | | | | |
| 1/21/2023 3:37 PM | | | | | | | | | | | | | | | | | |
|  | | | **Aggregate** |  | **Classification** |  | **Coverage** |  | **Number Of Coding References** | |  | **Reference Number** |  | **Coded By Initials** |  | **Modified On** |  |
|  | | | | | | | | | | | | | | | | | |
|  | | | | | | | | | | | | 12 |  | CP |  | 12/4/2022 7:03 PM |  |
|  | As the gun battles between the military and separatist fighters persist, many people in some of the localities where the fighting is taking place have fled into the forest for fear of being caught within the cross-fire.  Meanwhile, as the tension in the two restive regions rages on, government has embarked on a mission to fish out sympathisers and activists of the Anglophone cause. | | | | | | | | | | | | | | | |  |
|  |  | | | | | | | | | | | | | | | |  |
|  | | | | | | | | | | | | 13 |  | CP |  | 12/4/2022 7:15 PM |  |
|  | The night of Saturday February 2, 2019 will go down in history as one of the longest to witness sporadic gun shots in Kumba, chief town of Meme Division, South West Region of Cameroon ever since the current Anglophone impasse rocking the North West and South West Region erupted and later on escalated into confrontations between Separatists Fighters and Cameroon Defence Forces.  Denizens of Mile 1 Kumba Mbonge road, Kake and Ekombe villages in Mbonge Sub Division are living testimony of the fact that there were nonstop sporadic gun shots in these localities from 2am to 4 am breaking Sunday February 3, 2019.  Reports hold that though no one could immediately identify the various sounds of the gun there is every indication that the sounds were that of the Cameroon military.  An inhabitant of mile 1 around the Kumba- Mbonge road park told this Reporter that he only heard the sound of what he could identify as that of an alleged den gun at about 2 am and by 2:15 am he started hearing heavy gun shots from military that caused him to take the floor of his room as his bed.  Conflicting reports indicate that, the sporadic gun shots was as a results of rumours that circulated in Kumba that the Separatists fighters will storm the town to make sure the two weeks lockdown to run from Monday February 4 -14, 2019 as announced by Restoration forces is fully respected.  Kumba main market full to capacity | | | | | | | | | | | | | | | |  |
|  |  |
|  |  |
|  |  | | | | | | | | | | | | | | | |  |
|  | | | | | | | | | | | | 14 |  | CP |  | 12/4/2022 9:36 PM |  |
|  | Edith Kah Walla, President of the Cameroon People’s Party (CPP) has in a statement made clarifications on what she said at the George Washington University Institute for African Studies during a conference at which she spoke.  In her recent outing, Kah Walla said it would seem there has been quite a frenzy about a video snippet from the said conference. “This frenzy has resulted in some persons in the Diaspora calling me an “enabler and declaring me an enemy of Anglophones and demanding that I should be arrested and tried”.  She insists that: “The fact that the Biya Regime is absolutely culpable does not negate the fact that those who decided to take up arms to fight for independence misled and lied to the population from Day 1 and have continued to do so for the past 3 years.”  Though Kah Walla did not call names, The SUN recalls that Mark Bareta on April 19, 2019, through a Facebook post, declared Kah Walla “an enemy of the people”.  “It Is Finished: Bye Bye Kah Wallah,” Bareta captioned his message, stating that his declaration was informed by “a useless short clip of Lady Kah Wallah” he had listened to.  Hear him: “Her words today sitting in an all-white forum castigates the sacrifices of the suffering people of Southern Cameroons, it reduces the people of Southern Cameroons especially those back home as a people without their own convictions, their own actions. It legitimizes Cameroun actions and atrocities on our people and effectively offers a safety net and gap for Cameroun military to continue doing what they are doing on our people. For this reason, Kah Wallah has today declared herself AN ENEMY OF THE PEOPLE by her own making not ours. For doing this and under MY PERSONAL NAME AND SEAL, I AM DECLARING HER A PERSONA NON GRATA.”  In what appeared as a threat to Kah Walla’s life, Bareta goes on to write that: “All patriotic Southern Cameroonians both home and diaspora (Including French Cameroun), Ambazonia fighters everywhere they are must treat her henceforth as an enemy and SHE SHOULD BE ARRESTED any time she set her foot in Ambaland. In fact, she is banned from entering Ambazonia and all items, activities, persons linked to her operating in Ambazonia must be considered as ENEMY ENABLERS. She is the greatest ENABLER of our time. Bye Bye Kah Wallah. Good Night.”  Kah Walla replies!  In a rather composed tone, Kah Walla told her followers and the general public opinion that she has no fear in her heart and remains unwavering in her position.  “Please be assured, I am serene and focused on the fight for change for Cameroon, as I have been for decades. There is absolutely no fear in my heart. No fear of visiting the South West and North West regions, which I will do upon return to Cameroon. No fear for my life,” she said.  She goes on to add that: “Let me confirm some of the statements made at GWU, once again. There is an Anglophone problem in Cameroon which is over 60 years old. In the current phase of the Anglophone Crisis which erupted in October 2016, the Biya Regime holds 100% of the blame for the instigation and the escalation of the crisis. The Biya Regime refused to dialogue, refused to address fundamental problems and responded to non-violent protests with violence and killing. The Biya Regime cut off the internet for 3 months to the North West and South West. The Biya Regime radicalized the population and led to the taking up of arms by some groups. | | | | | | | | | | | | | | | |  |
|  |  |
|  |  |
|  |  |
|  |  |
|  |  | | | | | | | | | | | | | | | |  |
|  | | | | | | | | | | | | | | | | | |
| Reports\\Coding Summary By Node Report | | | | | | | | | | Page 16 of 140 | | | | | | | |
| 1/21/2023 3:37 PM | | | | | | | | | | | | | | | | | |
|  | | | **Aggregate** |  | **Classification** |  | **Coverage** |  | **Number Of Coding References** | |  | **Reference Number** |  | **Coded By Initials** |  | **Modified On** |  |
|  | | | | | | | | | | | | | | | | | |
|  | | | | | | | | | | | | 15 |  | CP |  | 12/4/2022 9:47 PM |  |
|  | Denizens of Mbalangi, a village along the Kumba-Buea highway in Mbonge Sub Division, Meme Division, South West Region have taken the bull by the horn, to say ‘No’ to the atrocities being carried out by “amba boys” on the population. The SUN Newspaper gathered that they are lamenting on the frequent harassments on them by “amba boys” and have thus, like one man, decided to rise up against such wanton activities.  Reports hold that the few inhabitants, who have mustered courage to go back to the village after several months of hiding in the bushes, took the firm commitment to chase out the “amba boys” in the locality recently.  The SUN gathered that, on that fateful Tuesday, known to be their market day, the courageous denizens had gone to the market to sell and buy food items and other goods of basic necessity. Unfortunately for them, some unidentified boys supposedly “amba boys” arrived the market and started asking for “support”. It is alleged that the news of their presence filtered out and got to the military base at Ediki village, few meters away from the market, who immediately rushed there to fish out the alleged “amba boys”. The unidentified boys The SUN gathered had already disappeared, but the presence of the military caused total panic to those who had gone there for business.  It is at this juncture that the inhabitants in that locality took the firm commitment to henceforth chase out any suppose “amba boy” in the area | | | | | | | | | | | | | | | |  |
|  |  |
|  |  | | | | | | | | | | | | | | | |  |
|  | | | | | | | | | | | | 16 |  | CP |  | 12/12/2022 1:12 AM |  |
|  | already engulfed in a deep internal crisis, which appears to be drifting factions of the set struggle for independence further and further apart.  The accusations and counter accusations are only making crystal clear the fact that power, which is loved by many, is also very slippery in the hands of many. Government’s announcement of an imminent dialogue to resolve the three-year old Anglophone crisis seems to have stoked the flames of division within a movement that for long has been mired in in-fighting. However, of late the crisis has deepened and it is burning hot and wild.  Last week, Chris Anu, communication secretary of the ‘Ambazonia Interim Government’ is said to have gathered some 100 members of the Ambazonia struggle for independence to impeach ‘President’ Sisiku Ayuk Julius as President of the Interim Government, of the supposed Federal Republic of Ambazonia. | | | | | | | | | | | | | | | |  |
|  |  |
|  |  | | | | | | | | | | | | | | | |  |
|  | | | | | | | | | | | | 17 |  | CP |  | 12/4/2022 10:05 PM |  |
|  | In a briefing note released February 18, 2020, the United Nations has urged the Cameroonian authorities to ensure that investigation into the Ngarbuh incident is independent, impartial and thorough, and that those responsible are held fully to account.  According to the UN, the incident “is a shocking episode in the ongoing crisis that has afflicted the country’s North-West and South-West regions for the past three years.”  Upholding the various versions to the story, the UN notes that “Witnesses said some 40 armed men, including members of the security and defence forces, attacked the village of Ngarbuh, in the department of Donga Mantung in North-West Cameroon, opening fire on people and burning down houses. The authorities said defence forces and gendarmes came under attack from people inside the village with the exchange of shots igniting a fire that affected several dwellings.” | | | | | | | | | | | | | | | |  |
|  |  |
|  |  | | | | | | | | | | | | | | | |  |
|  | | | | | | | | | | | | 18 |  | CP |  | 12/4/2022 10:30 PM |  |
|  | About three villages along the Kumba – Mundemba highways in Mbonge Sub Division, Meme Division South West Region took to the streets Wednesday, March 18, 2020 to say “No” to the presence of Separatist Fighters in their villages.  Reports hold that the entire villages of Small Ekombe, Ekombe Bonji and Kombone took the courage and stood up as one man to say enough is enough to what they described as “amba fools.”  The villagers in their numbers walked through the streets of the village with just one message: “enough is enough with this amba madness in the name of protecting us!”  Led by a quarter head, the villagers with peace plants highlighted the fact that ever since the alleged ‘Amba boys’ ‘besieged’ their villages in the name of the Anglophone struggle, they have never known peace. According to them, they live in constant fear and harassment from the ‘Amba boys’ and that this has been going on now for the past three years.  A denizen from Small Ekombe told The SUN that, they prefer to live with the devil they know “military”, than with the angel they don’t know “separatist fighters”, who he maintained have now become a thorn on their flesh.  It should be noted that these three villages have been the highest hit since the Anglophone crisis began. Most of their villages have been razed to the ground and they keep on giving ‘support’ to the ‘Amba boys’, yet their children can’t go to school and they live in constant fear of the unknown. | | | | | | | | | | | | | | | |  |
|  |  |
|  |  |
|  |  | | | | | | | | | | | | | | | |  |
|  | | | | | | | | | | | | | | | | | |
|  | | | | | | | | | | | | | | | | | |
| Reports\\Coding Summary By Node Report | | | | | | | | | | Page 17 of 140 | | | | | | | |
| 1/21/2023 3:37 PM | | | | | | | | | | | | | | | | | |
|  | | | **Aggregate** |  | **Classification** |  | **Coverage** |  | **Number Of Coding References** | |  | **Reference Number** |  | **Coded By Initials** |  | **Modified On** |  |
|  | **Nodes\\Economic Consequence** | | | | | | | | | | | | | | | |  |
|  | | **Document** | | | | | | | | | | | | | | |  |
|  | | | **Internals\\237 online** | | | | | | | | | | | | | |  |
| No |  |  |  | 0.0215 |  | 10 | |  | | | | | |
|  | | |  |  |  |  |  |  |  | |  | | | | | | |
|  | | | | | | | | | | | | 1 |  | CP |  | 12/5/2022 2:13 AM |  |
|  | L’avocat Ayah Paul Abine, ancien candidat à la présidence, a convenu avec le leader de la ‘révolution Coffin’, Mancho Bibixy Tse, qu’il n’y avait pas de plus noble cause que de faire campagne pour que les enfants retournent à l’école.  L’ancien député du RDPC a fait une sortie sur Facebook le lundi 8 juillet 2019 pour joindre sa voix à celle de Mancho emprisonné.  « Mancho Bibixy avait lancé une campagne en faveur du retour à l’école des enfants en septembre prochain. Il ne peut y avoir de cause plus noble! MAIS il reste un motif de préoccupation majeur.  Il est vrai que des images d’enfants braqués à l’école dans plusieurs pays déchirés par la guerre, notamment en Syrie, ont été vus. En outre, il est de notoriété publique que nous sommes ce que nous sommes aujourd’hui, principalement en raison de l’acquisition de connaissances issues de l’éducation formelle. Par conséquent, même les plus malhonnêtes ne douteraient pas que l’éducation formelle est primordiale pour la réussite dans la vie. | | | | | | | | | | | | | | | |  |
|  |  |
|  |  | | | | | | | | | | | | | | | |  |
|  | | | | | | | | | | | | 2 |  | CP |  | 12/5/2022 2:23 AM |  |
|  | Bibixy a dénoncé la lenteur du développement économique et structurel de la ville, déclarant qu’il était prêt à mourir tout en protestant contre la marginalisation sociale et économique des personnes anglophones dans cet État francophone hégémonique.  Selon le professeur d’histoire, les journalistes, alors que les troubles dans les régions du Nord-Ouest et du Sud-Ouest du Cameroun montent en flèche, les riches ont déplacé leurs enfants dans des zones plus sûres pour étudier tandis que les pauvres en paient le prix. | | | | | | | | | | | | | | | |  |
|  |  | | | | | | | | | | | | | | | |  |
|  | | | | | | | | | | | | 3 |  | CP |  | 12/5/2022 2:26 AM |  |
|  | Le manque à gagner en termes de chiffres d’affaires est estimé à 269,056 milliards FCFA dans les secteurs investigués : industries agroalimentaires, agro-industries locales, télécommunications, filière café – cacao, services agricoles et distribution. Près de 8 000 emplois relevant du secteur formel sont aujourd’hui menacés en plus des 6 434 emplois déjà perdus sur les sites en arrêt de production des agro-industries. A ce tableau noir, il importe de mentionner des pertes en vies humaines au rang des forces armées régulières, des enlèvements de civils contre rançons, la chute des exportations et des importations vers le Nigeria, une baisse d’activités qui n’est pas sans conséquences négatives sur les recettes douanières, ainsi que le phénomène de la prostitution qui a pris de l’ampleur dans les villes d’accueil des réfugiés internes. Des centaines de déplacés sans revenus étant désormais obligés de se livrer au commerce du s*e*xe. | | | | | | | | | | | | | | | |  |
|  |  |
|  |  | | | | | | | | | | | | | | | |  |
|  | | | | | | | | | | | | 4 |  | CP |  | 12/5/2022 2:32 AM |  |
|  | Les chiffres contenus dans le rapport de Refugees International sont alarmants. «1,3 million de personnes ayant besoin d’assistance humanitaire, 530 000 personnes déplacées au sein de la population anglophone au Nord-Ouest et au Sud-Ouest, environ 40 écoles détruites dans les régions anglophones, 42 500 enfants n’ont pas eu un accès continu à l’éducation au cours des trois dernières années».  Des statistiques qui selon l’organisme humanitaire indépendant sont niées par le pouvoir en place. «Les autorités camerounaises nient la gravité du déplacement et les besoins humanitaires. Pire, l’armée tout comme les séparatistes restreignent sévèrement la liberté de circulation, empêchant les populations locales d’accéder à leurs terres et à des services de base. Les deux (armée et séparatistes Ndlr) ont également pris des mesures visant à limiter l’accès des travailleurs humanitaires aux populations touchées par le conflit.»  Le rapport intitulé «Déni de crise: Le refus des dirigeants camerounais de reconnaître la crise fait peur aux donateurs» revient sur la guerre des chiffres entre le gouvernement et les Ong depuis le début de la crise «le ministre camerounais de l’Administration territoriale, Paul Atanga Nji, a déclaré que les Ong gonflaient les chiffres et faisaient la promotion de « fausses informations ». Le gouvernement prétend à tort qu’on enregistre seulement 152 000 déplacés dans le pays. L’Onu parle d’au moins 530 000 personnes». | | | | | | | | | | | | | | | |  |
|  |  |
|  |  | | | | | | | | | | | | | | | |  |
|  | | | | | | | | | | | | | | | | | |
|  | | | | | | | | | | | | | | | | | |
| Reports\\Coding Summary By Node Report | | | | | | | | | | Page 18 of 140 | | | | | | | |
| 1/21/2023 3:37 PM | | | | | | | | | | | | | | | | | |
|  | | | **Aggregate** |  | **Classification** |  | **Coverage** |  | **Number Of Coding References** | |  | **Reference Number** |  | **Coded By Initials** |  | **Modified On** |  |
|  | | | | | | | | | | | | | | | | | |
|  | | | | | | | | | | | | 5 |  | CP |  | 12/6/2022 12:09 AM |  |
|  | Son chiffre d’affaires est passé de 334,9 milliards de Fcfa en 2017 à 314,4 milliards de Fcfa en 2018, soit une baisse d’environ 20 milliards de Fcfa. C’est dans ce contexte difficile que l’assemblée générale des actionnaires de ce groupe va adopter les comptes de cet exercice, le 15 mai prochain à Douala.  Les actionnaires du Groupe Société Anonyme des Brasseries du Cameroun (SABC), de la Société des Eaux minérales du Cameroun (Semc) et de la Société Camerounaise de Verrerie (Socaver) ont rendez-vous le 15 mai prochain, au Castel Hall, sis à Douala. Ce sera, selon une annonce légale parue dans une édition du quotidien à capitaux publics, Cameroon tribune, à l’occasion de l’assemblée générale ordinaire. Une instance qui devra délibérer notamment sur le rapport de gestion du conseil d’administration, le rapport général des commissaires aux comptes. Tout comme il sera aussi question de procéder à l’approbation de l’ajustement du report à nouveau des exercices antérieurs au 1er janvier 2018 ; l’approbation des états financiers de synthèse de l’exercice social clos le 31 décembre 2018 ; l’approbation des états financiers de synthèse consolidé de l’exercice social clos le 31 décembre 2018 ; l’affection du résultat ; la fixation du dividende et de sa mise en paiement, etc. Il faut relever que cette assemblée générale des actionnaires va se tenir dans un contexte difficile, avec les résultats du groupe en deçà des attentes.  En effet, au cours de l’exercice 2018, le Groupe SABC a enregistré en 2018 un chiffre d’affaires TTC de 560,4 milliards de FCFA. Après déduction des ristournes, pour un montant de 28,7 milliards de FCFA, et des taxes, pour 217,3 milliards de FCFA, le chiffre d’affaires HT de l’année 2018 s’est établi à 314,4 milliards de F CFA contre 334,9 milliards en 2017, soit une baisse d’environ 20 milliards de FCFA. Le leader de l’industrie brassicole du pays traverse donc une mauvaise passe. Pourtant, en 2018, précise-t-on, la SABC a enregistré 2 % d’augmentation de ses volumes de vente. Une progression remarquable mais qui reste en retrait par rapport aux perspectives du marché, nettement plus ambitieuses. L’entreprise est en fait entravée par la dégradation du contexte économique depuis 2017 et par l’accroissement du risque sécuritaire. | | | | | | | | | | | | | | | |  |
|  |  |
|  |  |
|  |  | | | | | | | | | | | | | | | |  |
|  | | | | | | | | | | | | 6 |  | CP |  | 12/6/2022 1:26 AM |  |
|  | Un rapport du Gicam estime le manque à gagner des entreprises à plus de 269 milliards Fcfa et 6434 emplois déjà perdus.  L’opinion avait déjà une petite idée des effets néfastes de la crise anglophone sur l’économie nationale à la lecture de divers articles de presse. Des données plus détaillées sont désormais disponibles dans un rapport du Groupement inter-patronal du Cameroun (Gicam) daté de juillet 2018. Au plan macroéconomique, ce document révèle que plus de 269 milliards Fcfa de chiffre d’affaires se sont envolés et l’on enregistre 2,153 milliards Fcfa de pertes suite à la destruction de biens immobiliers, de matériels roulants et meubles. Dans le même temps, 8000 emplois relevant du secteur formel sont menacés, tandis que 6434 emplois sont déjà définitivement perdus sur les sites en arrêt de production des agro-industries.  Ces données catastrophiques résultent de plusieurs facteurs : les opérations « villes mortes », l’interruption du signal d’internet décidé en janvier 2017 et qui aura duré trois mois, les attaques ciblées contre les structures économiques, ainsi que les menaces, enlèvements, rackets et assassinats des employés et responsables d’entreprises. Le Gicam pointe également un doigt accusateur sur les décisions contre-productives prises par des autorités administratives, notamment la pose de scellés sur certains commerces. Des « actions qui relèvent d’un excès de zèle et même d’un abus d’autorité » puisqu’elles ne reposent sur aucune démarche logique selon le Gicam. | | | | | | | | | | | | | | | |  |
|  |  |
|  |  | | | | | | | | | | | | | | | |  |
|  | | | | | | | | | | | | 7 |  | CP |  | 12/6/2022 1:51 AM |  |
|  | Suite à l’escalade des violences causant des pertes humaines et économiques dans les régions du Nord-Ouest et du Sud-Ouest, depuis octobre 2016, le Groupement inter-patronal du Cameroun (Gicam) a mené une investigation auprès des entreprises opérant dans ces zones.  Les résultats de cette enquête du patronat camerounais, qui sont disponibles depuis le 13 septembre, ont permis de mettre en évidence les conséquences économiques et sociales de l’insécurité qui sévit actuellement dans ces régions.  Des entreprises consultées par le Gicam, 86% d’entre elles affirment que la crise dans ces régions a des répercussions négatives très importantes (50%), et importantes (36%) sur leurs activités. Selon les estimations sommaires réalisées, la crise a déjà coûté 2,153 milliards FCFA en termes de destructions de biens immobiliers, de matériels roulants et meubles.  Le manque à gagner en termes de chiffres d’affaires est estimé à 269,056 milliards FCFA dans les secteurs investigués : industries agroalimentaires, agro-industries locales, télécommunications, filière café – cacao, services agricoles et distribution.  Le Gicam souligne : « Il convient de signaler que le manque à gagner en termes de chiffres pour ces entreprises implique mécaniquement un manque à gagner immédiat de 5,9 milliards FCFA de recettes fiscales pour l’Etat, au titre de l’acompte de l’impôt sur les sociétés [dont le taux est fixé à 2,2% calculé sur le chiffre d’affaires] ».  En termes d’emplois, les pertes sont essentiellement celles des entreprises agro-industrielles. Dans l’ensemble, près de 8 000 emplois relevant du secteur formel sont aujourd’hui menacés en plus des 6 434 emplois déjà perdus sur les sites en arrêt de production des agro-industries.  Le Gicam arrive à la conclusion selon laquelle des mesures de sauvegarde s’imposent pour juguler cette situation. La plus importante est la stabilisation du contexte sécuritaire de manière à stopper la dégradation actuelle et enclencher un processus de retour à la paix dans l’ensemble du pays.  « Il est impératif d’éviter l’extension du climat d’insécurité à d’autres zones et régions du pays ; des cas de braquage d’entreprises par des groupes armés se signalant déjà dans la zone de Bonabéri [à Douala, la capitale économique du pays] », suggère le patronat camerounais.  Sylvain Andzongo | | | | | | | | | | | | | | | |  |
|  |  |
|  |  |
|  |  | | | | | | | | | | | | | | | |  |
|  | | | | | | | | | | | | | | | | | |
| Reports\\Coding Summary By Node Report | | | | | | | | | | Page 19 of 140 | | | | | | | |
| 1/21/2023 3:37 PM | | | | | | | | | | | | | | | | | |
|  | | | **Aggregate** |  | **Classification** |  | **Coverage** |  | **Number Of Coding References** | |  | **Reference Number** |  | **Coded By Initials** |  | **Modified On** |  |
|  | | | | | | | | | | | | | | | | | |
|  | | | | | | | | | | | | 8 |  | CP |  | 12/6/2022 2:01 AM |  |
|  | Des hommes non identifiés ont semé le trouble samedi dans cette ville la région du Sud-ouest, hors d’atteinte depuis le début de la crise.  La riposte des forces de l’ordre a permis de neutraliser deux des assaillants.  Le calme est revenu dimanche matin 15 juillet 2018 à Limbé. Les populations ont repeuplé les rues. Les chrétiens se sont rendus aux offices religieux. La quiétude apparente qui se lit sur les visages avait disparu 24 heures plus tôt, lorsque la ville a été prise d’assaut par des hommes armés, non identifiés.  Selon les témoignages, c’est autour de 16 h samedi 14 juillet 2018, que des individus armés de fusils et se déplaçant à bord d’un véhicule ont barré la voie à un camion de la Société anonyme des Brasseries du Cameroun (Sabc), transportant des boissons, au lieu-dit Mile 4, à l’entrée de la ville.  Les assaillants ont intimé l’ordre au conducteur de descendre du camion, avant de mettre le feu au véhicule. Ils ont ensuite pris la fuite en se dirigeant vers l’intérieur de la ville. Les forces de l’ordre, alertées, ont aussitôt ouvert le feu. Une source fait savoir que l’entrée de la ville de Limbé a été bloquée pendant l’échange des coups de feu, probablement pour tenter d’intercepter ces individus, au cas où ils empruntaient le même chemin au retour.  L’intervention des forces de l’ordre a permis de neutraliser deux des assaillants, selon certaines | | | | | | | | | | | | | | | |  |
|  |  |
|  |  | | | | | | | | | | | | | | | |  |
|  | | | | | | | | | | | | 9 |  | CP |  | 12/6/2022 2:05 AM |  |
|  | Le front de l’économie focalise l’attention des journaux camerounais parus mardi, sans pour autant occulter l’interminable guerre sécessionniste dans les régions du Nord-Ouest et du Sud-Ouest.  Quotidien à capitaux publics, Cameroon Tribune se penche sur les nouvelles règles des marchés publics, à la faveur d’un récent décret présidentiel y consacré, avec une nouvelle architecture bâtie dans un contexte où les entreprises publiques ne sont plus assujetties au Code des marchés publics, en termes de passation et de contrôle des marchés en leur sein.  Le texte ainsi révisé, apprend-on, renforce ce que le législateur appelle «principe d’éthique» et durcit les sanctions contre tout acteur coupable d’acte de corruption et autres manœuvres frauduleuses, telles que les manœuvres frauduleuses, les pratiques collusoires obstructives ou coercitives, le délit d’initié ou les conflits d’intérêt.  Dans le même domaine de la gouvernance, Le Quotidien de l’Économie, sous le titre «L’étau se resserre autour des DG des sociétés d’État», plante le décor à la veille d’une assise cruciale à laquelle le ministre des Finances, Louis Paul Motaze, les convie.  Ce sera certainement l’occasion, ose la publication spécialisée, de rappeler à ces gestionnaires souvent indélicats, habitués du gaspillage des biens sociaux, d’être rappelés à l’ordre avant la vague répressive.  Une entreprise anonyme à participation publique qu’InfoMatin appelle à sauver d’urgence, c’est la Société camerounaise des dépôts pétroliers (SCDP), contrôlé à hauteur de 51% par l’État et sans directeur général depuis que son manager, le cumulard Gaston Eloundou Essomba, a été promu ministre de l’Eau et de l’Énergie le 2 mars dernier.  Il se passe, explique le journal, que les deux cadres expatriés qui continuaient tant bien que mal de gérer les affaires courantes, à savoir le directeur général adjoint et le directeur de l’exploitation, sont arrivés en fin de mandat.  Selon des sources dignes de foi, ce sont ces deux responsables, deux maillons forts de l’entreprise dont le remplacement pas encore été pourvu qui, bon an mal an, ont pallié les manquements liés à la démission non formelle, mais bien réelle, du directeur général.  L’autre menace, qui cette fois plane sur les consommateurs et dont se fait l’écho Expression Économique, c’est la hausse annoncée en 2019 des prix de plusieurs denrées de première nécessité (pain, huile de cuisine, riz, etc.) : la circulaire fixant les grandes lignes de la prochaine Loi de finances prévoit la restauration de taxe sur l’importation desdits produits, un phénomène appelé à se répercuter sur le panier de la ménagère. Lire toutes les UNES du jour ici  Quasiment jamais sorti du sujet depuis bientôt trois ans, le quotidien à capitaux privés de langue anglaise The Guardian Post publie un dernier bilan de la guerre sécessionniste dans les régions du Nord-Ouest et du Sud-Ouest : six nouveaux morts dans la localité de Bafut, après des combats entre forces de défense et de sécurités et combattants de la «république d’Ambazonie».  Et comme si cela ne suffisait pas, les insurgés sont allés mettre feu à la tribune de la Place des fêtes de la localité de Foundong, toujours dans la région du Nord-Ouest, et en signe de défiance ont hissé le drapeau indépendantiste devant les bureaux administratifs.  Sur le terrain, s’offusque Aurore Plus, tout, aux yeux du gouvernement qui vient de dévoiler son plan d’urgence humanitaire pour ces régions sinistrées, semble se passer comme si le retour à la paix était une réalité alors que les violences prennent de l’ampleur.  Accusant le président Paul Biya de mettre la charrue avant les bœufs, le bihebdomadaire semble en vouloir particulièrement au ministre de l’Administration territoriale, Paul Atanga Nji, par ailleurs président du comité ad hoc de gestion des quelque 13 milliards FCFA de budget annoncés pour l’opération.  Présenté comme un «repris de justice à la moralité douteuse», celui qui est par ailleurs secrétaire permanent du Conseil national de la sécurité (CNS) est ainsi perçu non seulement dans sa région anglophone d’origine, mais surtout comme «une menace» pour les fonds publics ainsi mobilisés.  Face à la vague de protestations ayant suivi cette désignation controversée, des proches du chef de l’État, renchérit The Guardian Post, conseillent vivement à Paul Biya «de laisser tomber Atanga Nji» qui, plutôt que d’aider à trouver des solutions de sortie de crise, va davantage cristalliser la tension sur le terrain. | | | | | | | | | | | | | | | |  |
|  |  |
|  |  |
|  |  |
|  |  |
|  |  |
|  |  | | | | | | | | | | | | | | | |  |
|  | | | | | | | | | | | | | | | | | |
| Reports\\Coding Summary By Node Report | | | | | | | | | | Page 20 of 140 | | | | | | | |
| 1/21/2023 3:37 PM | | | | | | | | | | | | | | | | | |
|  | | | **Aggregate** |  | **Classification** |  | **Coverage** |  | **Number Of Coding References** | |  | **Reference Number** |  | **Coded By Initials** |  | **Modified On** |  |
|  | | | | | | | | | | | | | | | | | |
|  | | | | | | | | | | | | 10 |  | CP |  | 12/7/2022 12:59 AM |  |
|  | La paralysie des régions du Nord-Ouest et du Sud-Ouest a occasionné des pertes qui se chiffrent à plusieurs milliards de FCFA, selon les premières estimations.  La crise consécutive aux revendications dites « anglophones » a affecté négativement l’économie camerounaise. La paralysie de ces deux régions frontalières avec le Nigeria a considérablement ralenti l’activité économique, notamment les échanges commerciaux, aussi bien à l’intérieur du pays qu’entre le Cameroun et ce pays voisin qui demeure un partenaire de poids. Une étude récente a montré que 1 511 entreprises ont été créées dans ces deux régions depuis 2011. Lorsqu’on y ajoute les autres structures basées dans ces zones, dont la Cameroon developpement corporation (CDC), deuxième employeur après l’Etat, l’on comprend que ces deux régions constituent un vivier d’emplois dont la suspension peut s’avérer préjudiciable au tissu économique. Selon l’économiste Dieudonné Essomba, les régions du Sud-Ouest et du Nord-Ouest jouent un rôle stratégique dans l’économie camerounaise de par leur apport en devises. Par conséquent, toute perturbation d’activité ne peut que conduire à des pertes de devises pour le Cameroun. « Le Sud-ouest est incontestablement la région la plus importante par sa production du pétrole et ses exploitations agroindustrielles telles que la CDC, Pamol, etc. Cette région représente à elle seule pratiquement 45% des recettes en devises », explique Dieudonné Essomba. De manière globale, des opérateurs économiques indiquent qu’un ralentissement des activités est observé à Douala depuis que cette crise a éclaté. « Les activités à | | | | | | | | | | | | | | | |  |
|  |  |
|  |  | | | | | | | | | | | | | | | |  |
|  | | | **Internals\\Bamenda Online articles** | | | | | | | | | | | | | |  |
| No |  |  |  | 0.0041 |  | 3 | |  | | | | | |
|  | | |  |  |  |  |  |  |  | |  | | | | | | |
|  | | | | | | | | | | | | 1 |  | CP |  | 12/7/2022 11:52 PM |  |
|  | The political crisis in the North West and  South West regions of Cameroon, the economic sector is greatly hit as most  business have been forced to fold up as the local population continues to lose  jobs.  The brewery sector has been greatly hit in the  crisis as activities slow down due to a purported ban by separatist on products  of Les Brassseries du Cameroun because it is a French company.  This is not true. The SABC group has been in  Cameroon for the past 70 years at the service of the nation, largely employing  Cameroonians. The groups alone is the largest employer in the private sector  with at least 200.000 workers with the North West region alone holding about 13  percent of that figure, not to talk of the over 10.000 indirect jobs the  company creates. To force several Cameroonians in these two regions to stop  working is a falsehood which shouldd be wiped out. | | | | | | | | | | | | | | | |  |
|  |  |
|  |  |
|  |  | | | | | | | | | | | | | | | |  |
|  | | | | | | | | | | | | 2 |  | CP |  | 12/8/2022 1:27 AM |  |
|  | Candidates started sitting in for the written part of the June 2017 session of the GCE Board examination in all 10 regions of the country with special security measures put in place in "unified-accommodation" centres in the Northwest and Southwest regions due to the ongoing Anglophone crisis in the country. | | | | | | | | | | | | | | | |  |
|  |  | | | | | | | | | | | | | | | |  |
|  | | | | | | | | | | | | 3 |  | CP |  | 12/8/2022 1:29 AM |  |
|  | The sale of contraband petrol popularly called “fingue” or “zoazoa” in the Northwest region and Bamenda in particular has been strongly condemned by the Northwest Administration who blame it for adversely affecting the economy and the health of the sellers.  The Inspector General of the Region, Ivo Charles Makoge raised the worries during a sensitization meeting at the Governor’s office Wednesday June 14, 2017. He called on road side sellers to desist from the act as it adversely affects their health and the economy or the region.  The regional delegate of water and Energy for the NW, Antoine Bossong said there has been a drastic drop of sales at filling stations in Bamenda. He also added the illegal fuel damages vehicle engines and may cause cancer to those selling it. SONARA, the national refinery company he concluded is the sole body authorized to supply petrol and other related petroleum products in the country. | | | | | | | | | | | | | | | |  |
|  |  |
|  |  | | | | | | | | | | | | | | | |  |
|  | | | **Internals\\Cameroon Tribune** | | | | | | | | | | | | | |  |
| No |  |  |  | 0.0116 |  | 10 | |  | | | | | |
|  | | |  |  |  |  |  |  |  | |  | | | | | | |
|  | | | | | | | | | | | | 1 |  | CP |  | 1/21/2023 1:06 AM |  |
|  | Fears of alleged strike action by transporters slowed the economy but some vendors came out. Bamenda was slow to awake yesterday Monday, December 5, 2016. The population was gripped by the fear of weekend’s alleged strike action calling on transporters, taxi drivers and commercial motorcycle riders not to go out for work. That is perhaps, why some shops remained shot while very few taxis and commercial motorcycles circulated in town. | | | | | | | | | | | | | | | |  |
|  |  | | | | | | | | | | | | | | | |  |
| Reports\\Coding Summary By Node Report | | | | | | | | | | Page 21 of 140 | | | | | | | |
| 1/21/2023 3:37 PM | | | | | | | | | | | | | | | | | |
|  | | | **Aggregate** |  | **Classification** |  | **Coverage** |  | **Number Of Coding References** | |  | **Reference Number** |  | **Coded By Initials** |  | **Modified On** |  |
|  | | | | | | | | | | | | | | | | | |
|  | | | | | | | | | | | | 2 |  | CP |  | 1/21/2023 1:13 AM |  |
|  | Forces of Law and Order push back rioting youths from the streets, protesting ugly state of roads, poor work by Chinese company rehabilitating 40-year-old water system. Generalized trekking has been in vogue with very few commercial motorcycles available for service following Monday, November 21 2016 violent protests by some youths who erected barricades on the streets of Bamenda, burnt tires, slowed economic activities and seriously threatened social peace. Inhabitants are still at a loss about the situation which started with some youths who assembled in the neigbourhood of City Chemist Roundabout before proceeding to criss-cross the streets, expressing frustrations about the ugly state of roads in the city. Their first stop over was the Bamenda City Council premises where they destroyed the gate | | | | | | | | | | | | | | | |  |
|  |  | | | | | | | | | | | | | | | |  |
|  | | | | | | | | | | | | 3 |  | CP |  | 1/21/2023 1:14 AM |  |
|  | The incident caused the South West Chief Executive to go to Limbe. Though without loss of human life, at least 50 shops containing fowls, spices, palm oil, egusi, and much other food stuff have been razed to ashes in the night of Thursday breaking Friday (30-31 March) in the central Limbe Old Market. It was the second consecutive day Limbe was suffering from market arson as the neighbouring Limbe New Market had lost some four shops a night before to flames. The incident, as grievous as it was, caused the South West Governor, Bernard Okalia Bilai, to mobilise to the Limbe Market Friday afternoon especially as the suspect, through the help of the Limbe Council Vigilante group, had been caught and detained in the Limbe Central Police Station. Sources say the suspect was caught with fire-lighters and petrol at about 3 am Friday as he lit the last shops. The Limbe fire-fighting Brigade could only save the situation from escalating beyond the 50 shops burnt | | | | | | | | | | | | | | | |  |
|  |  |
|  |  | | | | | | | | | | | | | | | |  |
|  | | | | | | | | | | | | 4 |  | CP |  | 1/21/2023 2:05 AM |  |
|  | The Mayor under the supervision of the regional Governor ensured that all business premises were opened yesterday and denizens went about their activities unperturbed. As of yesterday, September 4, 2019, denizens of Buea went about their daily activities unperturbed and businesses were booming in the town. This follows Buea Council resolve to see that no institution is shut down in the municipality in the face of what many now call lockdown in the North West and South West Regions. Beginning from 9 am, Mayor Ekema Patrick Esunge led the Buea Council staff through the streets of Buea Town, Bokwango, Clerk Quarters, Great Soppo, Molyko and the Mile 17 Bus Station where they ensured that all business premises were opened and operational. The activities were supervised by South West Governor, Bernard Okalia Bilai and the region’s top administrators. Ekema Patrick explained to the press that while secessionists who are in the forest are preaching lockdown, they municipal officials who lived in their houses in the city are | | | | | | | | | | | | | | | |  |
|  |  |
|  |  | | | | | | | | | | | | | | | |  |
|  | | | | | | | | | | | | 5 |  | CP |  | 1/21/2023 2:14 AM |  |
|  | The South West regional chief town of Buea is alive since January 18, 2017 following two days of grounded activities resulting from the ghost town operations. News of Cameroon’s 2-1 win over Guinea Bissau, Wednesday, January 18, 2017 night sweetened the minds of the people. Inhabitants of the key towns of the South West Region awoke to normal activities across the region. From Menji in Lebialem to Kumba in Meme, passing through Bangem in Kupe-Muanenguba, Mamfe in Manyu, Mundemba in Ndian and Limbe in Fako these divisional headquarters echoes harmony, hustle and bustle since Wednesday. Some agitation earlier noted in neighouring towns of Buea such as Muyuka, Ekona and Mutengene were quickly quelled. At Ekona, a group of youngsters playing football near the main road engaged in a standoff with the forces of law and order after their ball was crushed by a passing vehicle. Travellers | | | | | | | | | | | | | | | |  |
|  |  |
|  |  | | | | | | | | | | | | | | | |  |
|  | | | | | | | | | | | | 6 |  | CP |  | 1/21/2023 2:16 AM |  |
|  | Confrontation between forces of law and order and population on Thursday morning froze activities in some parts of the town. Bamenda woke up on January 18, 2017 to see its streets as busy as a beehive following the ghost town operations of the two previous days. But on Thursday, January 19, 2017 activities were grounded in some parts of the town due to confrontation between the forces of law and other and the population. This was caused by the arrest of some youths at Ntamulung neighbourhood of Bamenda. When the population got news of the arrest of the young men, they went wild and mounted barricades thus pushing the forces of law and order to react with tear gas and water cannons. This grounded activities in some parts of the town like the main commercial streets, Ntarinkon amongst others. It is also worth mentioning that since Tuesday evening there is no Internet connection, thus making it difficult for banks and money transfer companies to operate. This has made life difficult as journalists are finding it difficult to file reports to their various newsrooms. At press time some | | | | | | | | | | | | | | | |  |
|  |  |
|  |  | | | | | | | | | | | | | | | |  |
|  | | | | | | | | | | | | 7 |  | CP |  | 1/21/2023 2:19 AM |  |
|  | The Divisional Officer and Mayor for Buea made an inspection outing yesterday to ascertain business resumption in the Regional headquarters. Deputy Mayor Mossoko later confirmed that the Buea Town market where the Divisional Officer, Wokam Paul and Mayor Ekema Patrick threatened to seal shops that were locked, was about half opened by mid day yesterday. The Mayor has promised to visit other commercial centres like Mile 17 and the Clerks quarters today with the same action. Although still timid, a few more pupils and students were seen in some campuses of Buea city yesterday. In the campus of the Bilingual Grammar School Molyko, Buea Town and Bokwaongo, dozens of pupils and students were seen playing in the school yards, many of them in assorted clothes. They were approached and they confirmed they were students. | | | | | | | | | | | | | | | |  |
|  |  |
|  |  | | | | | | | | | | | | | | | |  |
|  | | | | | | | | | | | | | | | | | |
| Reports\\Coding Summary By Node Report | | | | | | | | | | Page 22 of 140 | | | | | | | |
| 1/21/2023 3:37 PM | | | | | | | | | | | | | | | | | |
|  | | | **Aggregate** |  | **Classification** |  | **Coverage** |  | **Number Of Coding References** | |  | **Reference Number** |  | **Coded By Initials** |  | **Modified On** |  |
|  | | | | | | | | | | | | | | | | | |
|  | | | | | | | | | | | | 8 |  | CP |  | 1/21/2023 2:46 AM |  |
|  | The weekend featured more commercial activities with reassuring Security Forces around. Unlike recent weeks, Bamenda was busier over the weekend with life virtually returned to the city. The weekend featured more taxis and more Commercial motorcycles on the streets, especially at Commercial Avenue. Most shops that were shot reopened for customers on Saturday December 10, 2016. Motor parks and inter-urban transport Agencies were busy receiving and dispatching some passengers returning from the plantations in the South West region to spend end-of-year feasts with family members in their respective divisions. The rush for food items at the City’s markets was evident. On most lips were prayers for things to completely return to normal. Meanwhile, security forces are prominent at most of the City’s junctions, poised to intervene in their mission to protect people and property and give peace a chance in times like this. Their dissuasive presence also frightens some inhabitants who prefer to stay back | | | | | | | | | | | | | | | |  |
|  |  |
|  |  | | | | | | | | | | | | | | | |  |
|  | | | | | | | | | | | | 9 |  | CP |  | 1/21/2023 3:03 AM |  |
|  | The town was over the weekend rippled with normalcy and expectations. As Teachers’ syndicates, parents and officials of Education prepare to meet for dialogue in the days ahead, ghost schools and courts remained innate while the South West capital City of Buea visibly went about ordinary life as usual yesterday. Affluence was observed along the main street dissecting the city of Buea from Mile 17 to Buea-Town. Shops, markets, restaurants, road-side provision stores, beer parlours and off-licenses continued their daily activities. Taxis circulated the length and breadth of Buea as commuters moved freely without any hindrance. Excepting the traffic Police known to assist at the main road junctions, no men in uniforms were observed as in the past along the streets. | | | | | | | | | | | | | | | |  |
|  |  | | | | | | | | | | | | | | | |  |
|  | | | | | | | | | | | | 10 |  | CP |  | 1/21/2023 4:28 AM |  |
|  | An Agreement has been signed with some 18 North West and South West based civil society organisations for infrastructure and livelihood development. A quick return to normalcy in the North West and South West regions preoccupies the United Nations Development Programme, UNDP, whose small grants initiative to help matters inspires hope for many, suffering the consequences of the socio-political and security crisis rocking the regions. In effect, the UNDP has signed MOUs with some 18 North West and South West-based Civil Society Organisations to promote early economic recovery and social cohesion, support infrastructure and livelihood recovery in the affected regions. All beneficiary CSOs have received FCFA 180 million to fund projects that address livelihood issues, but also community dialogue, economic recovery and social cohesion through sports. The MOU event on 31st July, 2019 stressed the need for contributions to the wider effort of the Cameroon government and UN Agencies in Cameroon to promote social cohesion, reduce vulnerability and assist efforts in the North West and South West. It was against this backdrop, that the Resident Representative of the UNDP, Jean Luc Stalon said his organization’s strategic support to Cameroon's development agenda for 2018-2020 is based on UN development assistance framework. It is all about support that | | | | | | | | | | | | | | | |  |
|  |  |
|  |  | | | | | | | | | | | | | | | |  |
|  | | | **Internals\\EcoMatin** | | | | | | | | | | | | | |  |
| No |  |  |  | 0.0486 |  | 10 | |  | | | | | |
|  | | |  |  |  |  |  |  |  | |  | | | | | | |
|  | | | | | | | | | | | | 1 |  | CP |  | 12/9/2022 2:34 AM |  |
|  | La menace d’effondrement de l’économie camerounaise du fait de la crise socio-politique qui secoue les régions du Nord-Ouest et du Sud-Ouest du Cameroun est donc réelle. Et, le Groupement inter-patronal du Cameroun (Gicam), pour son étude sur les conséquences économiques et les impacts sur l’activité des entreprises, de l’insécurité dans ces régions au mois de juillet, va au-delà du simple constat. Mais le principal regroupement patronal du Cameroun propose des pistes pour réduire les impacts post-crise. La principale recette du Gicam est la mise en place d’un véritable « Plan Marshall » pour le relèvement économique de ces régions. De manière précise, le Gicam propose de remettre à niveau les infrastructures et équipements détruits, y compris par des subventions aux entités privées touchées ; mettre en place un plan de subventionnement massif des mastodontes agroindustrielles installées dans ces zones et particulièrement sinistrées (CDC, PAMOL, …); octroyer des appuis spécifiques aux producteurs agricoles pour reconstituer leurs matériel végétal et relancer les productions vivrières indispensables pour assurer la sécurité alimentaire des populations ; instaurer des incitations spécifiques et probantes pour les investissements réalisées dans ces Régions. Et enfin, relancer et intensifier la construction d’infrastructures publiques (écoles, routes, adduction d’eau, électrification, bâtiments administratifs, …) dans les deux régions. | | | | | | | | | | | | | | | |  |
|  |  |
|  |  | | | | | | | | | | | | | | | |  |
|  | | | | | | | | | | | | 2 |  | CP |  | 12/9/2022 2:35 AM |  |
|  | Selon les estimations du Groupement inter-patronal du Cameroun (Gicam), le manque à gagner pour les entreprises qui y sont installés est estimé à environ 269 milliards de FCFA, pour près de 8 000 emplois relevant du secteur formel menacés. | | | | | | | | | | | | | | | |  |
|  |  | | | | | | | | | | | | | | | |  |
|  | | | | | | | | | | | | 3 |  | CP |  | 12/9/2022 2:41 AM |  |
|  | Née à la fin de l’année 2016 de simples revendications corporatistes portées par les avocats et les enseignants, la crise dans les parties anglophones du pays s’est ensuite transformée en revendications séparatistes violentes. Causant des bilans alarmants sur le plan socio-économique, qui depuis quelques temps entraînent des accusations portées à l’endroit des forces nationales de défenses et de sécurité camerounaises. Les plus récentes sont les accusations « d’exactions et autres graves atteintes aux droits de l’Homme dirigées sur les civiles »  décriées par le parlement européen le 18 avril 2019. | | | | | | | | | | | | | | | |  |
|  |  | | | | | | | | | | | | | | | |  |
| Reports\\Coding Summary By Node Report | | | | | | | | | | Page 23 of 140 | | | | | | | |
| 1/21/2023 3:37 PM | | | | | | | | | | | | | | | | | |
|  | | | **Aggregate** |  | **Classification** |  | **Coverage** |  | **Number Of Coding References** | |  | **Reference Number** |  | **Coded By Initials** |  | **Modified On** |  |
|  | | | | | | | | | | | | | | | | | |
|  | | | | | | | | | | | | 4 |  | CP |  | 12/9/2022 2:47 AM |  |
|  | L’insécurité installée par cette situation est telle que cette société d’Etat a dû fermer la plupart de ses plantations à l’exploitation, laissant ainsi oisive, une bonne partie de ses 22 000 employés. Par contre, entre juillet et août 2018, la filiale  locale de la Compagnie fruitière de Marseille, la société des Plantations du Haut-Penja (PHP), a assuré près de 75% des exportations de bananes au Cameroun, avec un volume de 28 434 tonnes de bananes expédiées entre juillet et août 2018. | | | | | | | | | | | | | | | |  |
|  |  | | | | | | | | | | | | | | | |  |
|  | | | | | | | | | | | | 5 |  | CP |  | 12/10/2022 12:02 AM |  |
|  | Du fait de cette crise sociopolitique qui secoue depuis trois ans les régions du Nord-Ouest et du Sud-Ouest, le concessionnaire du service public de l’électricité au Cameroun, révèle avoir enregistré un manque à gagner d’environs 10 milliards de FCFA sur ses ventes annuelles de 2018. | | | | | | | | | | | | | | | |  |
|  |  | | | | | | | | | | | | | | | |  |
|  | | | | | | | | | | | | 6 |  | CP |  | 12/10/2022 12:20 AM |  |
|  | La crise dans les Régions du Sud et du Nord-ouest n’est pas que politique et sécuritaire. Elle est également économique. John Mbah Akuoh, Nelson Mangeh, Ntumfoyn Boh Herbert, Elvis Kometa, Samuel Sako, Lucas Cho Ayaba, leaders séparatistes des organisations Agc, l’Ig, le Morisc, le Roa, le Scyl, Scnc et le Consortium, envisagent faire main-basse sur les richesses des régions du Sud et du Nord-Ouest, dotées d’un important potentiel économique. Plan d’appropriation au sein d’un regroupement baptisé « Front line of the libération of Ambazonia ». Pour preuve, cette mise en garde des sécessionnistes anglophones sur les richesses minières, pétrolières, halieutiques ou touristiques de ces deux régions, à l’issue d’une réunion tenue les 17 et 18 septembre 2018 à Washington, la capitale politique des Etats-Unis. | | | | | | | | | | | | | | | |  |
|  |  | | | | | | | | | | | | | | | |  |
|  | | | | | | | | | | | | 7 |  | CP |  | 12/10/2022 12:22 AM |  |
|  | D’après David Kegne, expert des microfinances, « l’industrie de la microfinance en Afrique centrale traverse un tournant décisif de son histoire, avec notamment plusieurs défis à relever« . Qu’il cite: le référencement sur les principales plateformes de transparence mises en place par les partenaires d’appui à l’industrie de la microfinance, l’amélioration de la qualité du portefeuille de crédit, le taux du Portefeuille à risque (Par) en zone Cemac étant supérieur à 15% alors que le maximum admis est de 5%, l’adoption des principes de bonne gouvernance, un système d’information de gestion à consolider et la mise en place d’un dispositif de prévention et de gestion de crise. Des outils techniques de garantie de la transparence dans l’industrie de la microfinance. | | | | | | | | | | | | | | | |  |
|  |  | | | | | | | | | | | | | | | |  |
|  | | | | | | | | | | | | 8 |  | CP |  | 12/10/2022 12:27 AM |  |
|  | Lors du Grand dialogue national organisé du 30 septembre au 4 octobre 2019 à Yaoundé, les organisations patronales se sont inquiétées de la situation économique dans les régions du Nord-ouest et du Sud-ouest.  En début septembre, le ministère de l’Economie indiquait qu’au premier trimestre 2019, le budget d’investissement public (BIP) dans ces régions était de 4% pour le Sud-Ouest et 8% dans le Nord-Ouest, alors qu’un an plus tôt, ces taux étaient respectivement de 45,6% et 51,2%.  Pour pallier le déficit, Christol George Manon, directeur général de la Mission d’aménagement et de gestion des zones industrielles (MAGZI), informe les opérateurs économiques de la création à Nkwen (Bamenda dans le Nord-Ouest), et à Ombé dans le Sud-Ouest-Ouest de deux zones industrielles.  « Ces zones industrielles sont opérationnelles et disposent de toutes les facilités nécessaires à l’implantation des entreprises », indique-t-il.  Le DG de la MAGZI rappelle que cette initiative s’inscrit en droite ligne des recommandations du Grand dialogue national, et lance un appel à tous les opérateurs à venir investir dans ces zones en y créant des activités génératrices de richesses et d’emplois. Ce qui devrait permettre de limiter les incidences économiques de la question sécuritaire  dans ces régions. On se rappelle une enquête du Groupement inter patronal du Cameroun (GICAM) qui révélait que la Cameroon development corporation (CDC) a perdu plus d’1 | | | | | | | | | | | | | | | |  |
|  |  |
|  |  | | | | | | | | | | | | | | | |  |
|  | | | | | | | | | | | | 9 |  | CP |  | 12/10/2022 12:29 AM |  |
|  | À cause de la crise anglophone, les taux d’exécution du Budget d’investissement public (BIP) sont en mauvaise posture dans le Sud-ouest (SO) et le Nord-ouest (NO). Au premier semestre 2019, ces taux sont de 4% pour le SO et 8% pour le NO. Cela signifie que près 90% des projets inscrits dans le budget d’investissement public de ces régions n’ont pas été réalisés. | | | | | | | | | | | | | | | |  |
|  |  | | | | | | | | | | | | | | | |  |
|  | | | | | | | | | | | | 10 |  | CP |  | 12/10/2022 12:31 AM |  |
|  | Les régions camerounaises du Nord-Ouest, du Sud-Ouest (NO/SO), et de l’Extrême-Nord ont été déclarées lundi 02 septembre 2019 « zones économiquement sinistrées », selon un décret signé par le Premier ministre Joseph Dion Ngute. Ce texte vise à créer des mesures favorables pour l’installation d’entreprises dans ces zones touchées par l’insécurité. Celles qui s’y installeront bénéficieront d’exonération de taxes et d’impôts pendant une période de trois ans.  Les dispositions du gouvernement sur les « zones économiques sinistrées » se rajoutent ainsi  à la loi portant incitations à l’investissement privé en République du Cameroun. Ce texte de 2013, qui a été révisé en 2017, accorde aux investisseurs des exonérations fiscalo-douanières sur une période allant de 5 à 10 ans. | | | | | | | | | | | | | | | |  |
|  |  | | | | | | | | | | | | | | | |  |
|  | | | | | | | | | | | | | | | | | |
| Reports\\Coding Summary By Node Report | | | | | | | | | | Page 24 of 140 | | | | | | | |
| 1/21/2023 3:37 PM | | | | | | | | | | | | | | | | | |
|  | | | **Aggregate** |  | **Classification** |  | **Coverage** |  | **Number Of Coding References** | |  | **Reference Number** |  | **Coded By Initials** |  | **Modified On** |  |
|  | | | **Internals\\Eden Newspaper** | | | | | | | | | | | | | |  |
| No |  |  |  | 0.0091 |  | 4 | |  | | | | | |
|  | | |  |  |  |  |  |  |  | |  | | | | | | |
|  | | | | | | | | | | | | 1 |  | CP |  | 12/11/2022 12:16 AM |  |
|  | Since the socio-political crisis started, nearly two years ago, in Cameroon’s Anglophone regions, palm oil processing has been facing various disruptions mainly within agri-business firms such as CDC and Pamol. This was reported by the Oilseed Sector Regulatory Committee.  Speaking during a meeting held in Yaoundé July 3, the committee’s chairman Emmanuel Nkoulou Ada commented that the Anglophone crisis has a direct mechanical effect on the sector, especially as CDC and Pamol are the county’s key processors. “The volume generated from these firms is far below their capacity and also, they are unable to trade their products. This situation does not ease distribution,” Nkoulou said.  Moreover, the official indicated that the companies have a foothold in other regions as they are inclusive organizations helping populations through the construction of schools and hospitals, as well as other social facilities | | | | | | | | | | | | | | | |  |
|  |  |
|  |  | | | | | | | | | | | | | | | |  |
|  | | | | | | | | | | | | 2 |  | CP |  | 12/11/2022 12:47 AM |  |
|  | Following a spate of violence in Cameroon’s Anglophone regions which started since October 2016, the national inter-employers’ group conducted an investigation with companies operating in the areas.  Results published  13 September  showed that 86% of companies surveyed witnessed significant (36%) and very serious (50%) impact on business. The unrest has already cost CFA2.153 billion in real property, rolling stock and furniture while the turnover shortage is valued at CFA269.056 billion.  “This shortage in business turnover implies an immediate loss of CFA5.9 billion in government’s tax revenues, as a deposit of corporate tax [the rate of which is set at 2.2% calculated on turnover]”, Gicam pointed out.  In terms of job losses, agro-industrial companies are atop the list. Overall, nearly 8,000 jobs in the formal sector are threatened in addition to the 6,434 jobs already lost.  The group suggests to stabilize the security environment as to better control the situation and initiate peace restoring process across the country.  “It’s urgent to stop the extension of the unrest to other areas and regions. Cases of company holdups by armed groups are already reported in Bonabéri [in Douala, the country’s economic capital],” Gicam concluded. | | | | | | | | | | | | | | | |  |
|  |  |
|  |  | | | | | | | | | | | | | | | |  |
|  | | | | | | | | | | | | 3 |  | CP |  | 12/11/2022 12:54 AM |  |
|  | The economy of the troubled English-speaking regions is slowly grinding to a halt as the long drawn-out crisis is forcing some local businessmen to put their safety over commerce. | | | | | | | | | | | | | | | |  |
|  |  | | | | | | | | | | | | | | | |  |
|  | | | | | | | | | | | | 4 |  | CP |  | 12/11/2022 1:03 AM |  |
|  | The Cameroon Development Corporation, CDC will not abandon its apolitical and people centred values despite the current difficulties that it faces.  This assurance was given by the General Manager of the corporation Franlin Ngoni Njie in a recent press release. | | | | | | | | | | | | | | | |  |
|  |  | | | | | | | | | | | | | | | |  |
|  | | | **Internals\\La voix du centre** | | | | | | | | | | | | | |  |
| No |  |  |  | 0.0081 |  | 2 | |  | | | | | |
|  | | |  |  |  |  |  |  |  | |  | | | | | | |
|  | | | | | | | | | | | | 1 |  | CP |  | 12/11/2022 2:42 AM |  |
|  | les forces armées Nigérianes et Camerounaises et, notamment les démarches entreprises en matière de recherche de paix, nous ont d’avantage outillé sur l’action à mener, lors des négociations que peuvent connaître la présence des forces androgènes et exogènes. Pour mémoire en effet, ces démarches pacifiques se sont soldées par les accords historiques de Greentree, le 12 juin 2006. Lesquels accords ont révèlé le 14 août 2013, la plénitude de la souveraineté de l’Etat du Cameroun sur la péninsule de Bakassi après une période de transition de cinq ans.  Si l’on s’en tient à cet exemple fortement illustratif, les acteurs clés que connaissent cette crise devraient, pour les motifs de paix, s’asseoir sur un terrain neutre accompagné par un médiateur choisi par les parties prenantes. Le but bien sûr étant de se regarder en face et d’en trouver enfin des mesures de solutions devant mettre un terme définitif à cette crise qui, depuis 03 ans, a déjà fait perdre à l’Etat du Cameroun des Milliards chaque mois, notamment, des pertes en biens matériels et en vies humaines ainsi que des milliers de déplacés. | | | | | | | | | | | | | | | |  |
|  |  |
|  |  | | | | | | | | | | | | | | | |  |
|  | | | | | | | | | | | | | | | | | |
| Reports\\Coding Summary By Node Report | | | | | | | | | | Page 25 of 140 | | | | | | | |
| 1/21/2023 3:37 PM | | | | | | | | | | | | | | | | | |
|  | | | **Aggregate** |  | **Classification** |  | **Coverage** |  | **Number Of Coding References** | |  | **Reference Number** |  | **Coded By Initials** |  | **Modified On** |  |
|  | | | | | | | | | | | | | | | | | |
|  | | | | | | | | | | | | 2 |  | CP |  | 12/11/2022 3:37 AM |  |
|  | Le gouvernement serait tombé sur une multitude de bordereaux de versement qui démontrent les traces de financements du jeune camerounais. Se fiant sur ces documents, les forces de sécurité camerounaise aurait mis tout en œuvre afin de capturer ce dernier. Au dernier nouvelles, il serait aperçu du côté du Nigeria en pleine réunion avec ses Compères. Egalement, Derick Stéphane avant cela a rejoint l’Italie en 2012 où il a été recruté dans une entreprise de la place et se servirait de son salaire pour nourrir les exactions qui sévissent dans les deux régions du Nord-Ouest et du Sud-Ouest. Avec les financements récurrents, le jeune homme âgé de 24 ans et originaire de la région du Nord-Ouest est accusé d’avoir financé les « Ambaboys » pendant un bon bout de temps.  Mais, après que les forces de sécurité ont découvert les traces des transactions de ce dernier, une interruption brute | | | | | | | | | | | | | | | |  |
|  |  |
|  |  | | | | | | | | | | | | | | | |  |
|  | | | **Internals\\the sun newspaper** | | | | | | | | | | | | | |  |
| No |  |  |  | 0.0024 |  | 2 | |  | | | | | |
|  | | |  |  |  |  |  |  |  | |  | | | | | | |
|  | | | | | | | | | | | | 1 |  | CP |  | 12/3/2022 4:49 PM |  |
|  | According to our sources, the ‘peace mission’ cost the state circa FCFA 600 million and each regional delegation was expected to manage between FCFA 250-300 million.  The money was meant for transportation of elites and for food and drink during the talks with local communities. However, some of the elites who spoke to The SUN on conditions of anonymity queried why FCFA 500,000 was to be given to divisional officers and another FCFA 800,000 to chiefs of each division.  According to our sources, each division was entitled to about FCFA 2.1 million and the amount left nothing for the travelling elites who did all the field work, after the DOs and Chiefs’ cut had been deducted. | | | | | | | | | | | | | | | |  |
|  |  |
|  |  | | | | | | | | | | | | | | | |  |
|  | | | | | | | | | | | | 2 |  | CP |  | 12/4/2022 12:12 AM |  |
|  | “We are using the International Day of Teachers to appeal to parents of Meme Division to see the need to send their children to school. We think that every other thing maybe wrong but we shall not do the last one by killing the same children we think we are fighting for”, the delegate noted.  On his part Meme Senior Divisional Officer, Chamberlain Ntou’ou Ndong said the day is set aside for teachers to take stock and reflect on their activities and quality of services rendered.  The SDO further urged teachers in the division to fight against vices in the educational milieu such as indiscipline, laziness, absenteeism and bribery and corruption.  Mr. Ntou’ou Ndong noted that the celebration challenged the thoughts of many who thought | | | | | | | | | | | | | | | |  |
|  |  |
|  |  | | | | | | | | | | | | | | | |  |
|  | **Nodes\\Effects** | | | | | | | | | | | | | | | |  |
|  | | **Document** | | | | | | | | | | | | | | |  |
|  | | | **Internals\\237 online** | | | | | | | | | | | | | |  |
| No |  |  |  | 0.0162 |  | 10 | |  | | | | | |
|  | | |  |  |  |  |  |  |  | |  | | | | | | |
|  | | | | | | | | | | | | 1 |  | CP |  | 12/5/2022 1:06 AM |  |
|  | Pinterest  En dépit du climat d’insécurité qui règne dans les deux Régions anglophones du Cameroun où sont concentrés l’essentiel de ses activités, elle a pu exporter 301 tonnes de bananes en juin 2020.  Selon les données de l’Association bananière du Cameroun (ASSIBACAM), La Cameroon Development Corporation (CDC), 2e employeur du pays après l’administration publique, a exporté 301 tonnes de bananes au cours du mois de juin 2020. Toute chose qui marque sa réapparition sur le fichier des exportateurs après dix-neuf mois d’absence. Il est bon de savoir que la CDC est le deuxième employeur camerounais après l’Etat. Mais du fait de l’insécurité créée par les séparatistes anglophones dans les Régions du Nord-Ouest et de Sud-Ouest du Cameroun, les activités de cette importante unité agro-industrielle public étaient en berne depuis plus d’un an.  Aujourd’hui c’est à la grande satisfaction du top management et des employés, ainsi que de l’Etat du Cameroun, que la Cameroon Development Corporation fait son come-back dans la liste des exportateurs. Pour ce retour, la CDC se positionne comme numéro 2 du marché de la banane, derrière la société des Plantations du Haut Penja (PHP), et devant Boh Plantations Plc. | | | | | | | | | | | | | | | |  |
|  |  |
|  |  | | | | | | | | | | | | | | | |  |
| Reports\\Coding Summary By Node Report | | | | | | | | | | Page 26 of 140 | | | | | | | |
| 1/21/2023 3:37 PM | | | | | | | | | | | | | | | | | |
|  | | | **Aggregate** |  | **Classification** |  | **Coverage** |  | **Number Of Coding References** | |  | **Reference Number** |  | **Coded By Initials** |  | **Modified On** |  |
|  | | | | | | | | | | | | | | | | | |
|  | | | | | | | | | | | | 2 |  | CP |  | 12/5/2022 1:12 AM |  |
|  | Pauline Mafor, âgée de 44 ans, mère de six enfants est une déplacée de la crise anglophone qui s’est installée à Yaoundé et qui vend chaque matin les beignets haricots et bouillies.  La saveur des beignets, haricots, bouillies stimule les papilles gustatives de nombreux jeunes du quartier Ebom à Yaoundé. Maman Pauline, est une déplacée de la crise anglophone qui s’est installée à Yaoundé et qui vend chaque matin les beignets haricots et bouillies. Cet article rend un  vibrant hommage pour le courage et l’abnégation dont elle ne s’est jamais départie depuis déjà trois ans. Elle est une quadragénaire, corpulence moyenne, sur une charpente corporelle de 171cm de hauteur, pour 85 kg. La démarche sûre et lente, elle est à chaque fois couverte d’éloges par ses clients. Madame Pauline Mafor de son nom à l’état civil, est originaire de Kumbo dans la région du Nord-Ouest du Cameroun. Depuis bientôt trois ans, elle a prêté serment auprès de sa propre conscience de donner le meilleur d’elle-même pour que chaque matin, les beignets, haricots et bouillie soient prêts pour le plaisir des habitants de l’arrondissement de Yaoundé III. « Je suis Pauline Mafor, j’ai 44 ans et j’ai six enfants, trois filles et trois garçons. Je suis une déplacée de la crise anglophone. Je me suis installée ici avec ma famille au début de la crise en 2016. J’ai eu beaucoup de chance parce que j’ai ma fille ainée ici à Yaoundé. Elle m’a aidé à m’installer ici. | | | | | | | | | | | | | | | |  |
|  |  |
|  |  | | | | | | | | | | | | | | | |  |
|  | | | | | | | | | | | | 3 |  | CP |  | 12/5/2022 2:24 AM |  |
|  | Les chiffres de l’UNICEF sont alarmants «au moins 74 écoles ont été détruites, tandis que les élèves, les enseignants et le personnel scolaire ont été exposés à la violence, aux enlèvements et à l’intimidation », a regretté vendredi le porte-parole du le Fonds des Nations Unies pour l’enfance (UNICEF), Toby Fricker, lors d’un point de presse à Genève.  Depuis trois ans, l’éducation de plus de 600 000 enfants est en péril. En raison de l’interdiction de l’éducation par des groupes armés non étatiques et des attaques, plus de 80 % des écoles ont été fermées, touchant plus de 600 000 enfants, révèle l’organisme onusien. | | | | | | | | | | | | | | | |  |
|  |  | | | | | | | | | | | | | | | |  |
|  | | | | | | | | | | | | 4 |  | CP |  | 12/5/2022 2:34 AM |  |
|  | Le décompte est fait par le Centre for Human Rights and Democracy in Africa dans un récent rapport.  Entre 2017 et 2019, 206 villages ont été brûlés dans les régions du Nord-ouest et du Sud-ouest du Cameroun. C’est ce que rapporte le Centre for Human Rights and Democracy in Africa (CHRDA), dans un rapport récemment rendu public.  Dans ce décompte, l’Ong rapporte que dans la région du Nord-ouest, 107 villages ont été réduits en cendres, pour 99 villages dans la région du Sud-ouest.  Dans ces chiffres, l’on note que 134 villages ont été « sévèrement affectés », autrement dit une destruction complète du village. 57 villages ont été partiellement affectés avec incendie de maison et destruction de bien ; et 15 ont connu des dommages encore moindres.  Depuis 2017, les régions anglophones se sont soulevées contre le pouvoir central dans ce qui s’est transformé en guerre civile entre militaires et indépendantistes armés. L’armée est régulièrement accusée de pratiquer la tactique de la terre brulée en incendiant des villages | | | | | | | | | | | | | | | |  |
|  |  |
|  |  | | | | | | | | | | | | | | | |  |
|  | | | | | | | | | | | | 5 |  | CP |  | 12/5/2022 11:24 PM |  |
|  | hommes et femmes, vivent dans le centre de désarmement, démobilisation et réinsertion de Bamenda. Ces jeunes, dont l’âge varie entre 14 et 25 ans, ont combattu dans les rangs des Ambas, le nom donné aux séparatistes armés . Outre la lutte pour la création d’un Etat indépendant, Nkeng Florence, une ex-combattante, mère de deux enfants, dit avoir pris les armes contre son pays, après l’incendie de sa boutique. | | | | | | | | | | | | | | | |  |
|  |  | | | | | | | | | | | | | | | |  |
|  | | | | | | | | | | | | 6 |  | CP |  | 12/6/2022 12:15 AM |  |
|  | Ces Camerounais désormais en chômage, font partie des victimes de la crise sociopolitique qui sévit dans les régions du Nord-Ouest et Sud-Ouest.  La crise socio-politique qui sévit depuis près de trois ans, dans les régions du Nord-Ouest et Sud-Ouest, a des conséquences néfastes dans le secteur socio-économique camerounais et principalement dans les deux régions touchées. Lors de la célébration de la 133e fête du travail, le 1er mai dernier, le délégué régional du ministère du Travail et de la Sécurité Sociale de la région du Nord-Ouest, a dressé un bilan plutôt déplorable de la situation socio-économique dans cette zone. En effet, selon le délégué, près de 4000 employés ont été contraints au chômage à cause des tensions socio-politiques. Lors du défilé, une quinzaine d’entreprises seulement, sur les 100 enregistrées dans la ville de Bamenda ont participé à la parade. | | | | | | | | | | | | | | | |  |
|  |  |
|  |  | | | | | | | | | | | | | | | |  |
|  | | | | | | | | | | | | | | | | | |
|  | | | | | | | | | | | | | | | | | |
| Reports\\Coding Summary By Node Report | | | | | | | | | | Page 27 of 140 | | | | | | | |
| 1/21/2023 3:37 PM | | | | | | | | | | | | | | | | | |
|  | | | **Aggregate** |  | **Classification** |  | **Coverage** |  | **Number Of Coding References** | |  | **Reference Number** |  | **Coded By Initials** |  | **Modified On** |  |
|  | | | | | | | | | | | | | | | | | |
|  | | | | | | | | | | | | 7 |  | CP |  | 12/6/2022 1:11 AM |  |
|  | Selon un récent Rapport du Haut-Commissariat pour les Réfugiés, près de 600 personnes en situation de détresse ont rejoint les camps des déplacés au cours des deux dernières semaines.  La crise anglophone envoie chaque jour sur les chemins de l’exil des milliers de réfugiés fuyant la guerre qui fait rage entre les combattants  sécessionnistes et les soldats de l’armée régulière. La situation de ces personnes déplacées dont le nombre ne cesse de s’accroître au fil des jours tant à l’intérieur qu’à l’extérieur du pays préoccupe au plus haut point le Haut-Commissariat pour les Réfugiés.  Au cours de ces deux dernières semaines, l’afflux massif des populations du Nord-ouest et du Sud-ouest du fait de la recrudescence des violences entre les combattants sécessionnistes et les soldats de l’armée régulière a eu pour conséquence immédiate l’arrivée de près de 600 personnes en détresse dans les camps des réfugiés du côté du Nigéria.  Présentant son Rapport sur la situation des déplacés camerounais qui fuient les violences dans le Nord-ouest et le Sud-ouest, le porte-parole du Haut-Commissariat pour les réfugiés (HCR), Babar Baloch, a tiré la sonnette d’alarme. C’était au cours d’une conférence de presse tenue ce 09 novembre 2018 au Palais des Nations à Genève. « Cette semaine, s’inquiète Babar Baloch, le nombre de réfugiés camerounais qui ont fui les violences et trouvé refuge au Nigéria a franchi le seuil des 30 000 personnes. Les réfugiés qui fuient les régions du sud-ouest et du nord-ouest du Cameroun affluent depuis septembre 2017. Ces deux dernières semaines, près de 600 personnes sont arrivées dans les installations de réfugiés », a-t-il déclaré. Selon Babar Baloch, environ 21 000 réfugiés vivent au sein de communautés d’accueil dans 50 localités éparpillées sur 116 000 kilomètres carrés et sont hébergés dans les Etats nigérians d’Akwa Ibom, Cross River, Benue et Taraba, où la plupart sont accueillis au sein des communautés locales. | | | | | | | | | | | | | | | |  |
|  |  |
|  |  |
|  |  | | | | | | | | | | | | | | | |  |
|  | | | | | | | | | | | | 8 |  | CP |  | 12/6/2022 1:48 AM |  |
|  | Les populations fuient en masse les Régions du Sud-Ouest et Nord-Ouest pour éviter d’être les victimes de l’assaut final annoncé par les séparatistes.  Des colonnes de familles, hommes, femmes et enfants. Bagages au dos, sur les épaules, sur la tête ou dans un porte tout. Direction, les gares routières et autres agences de voyages éparpillées dans différentes localités du Sud-Ouest et du Nord-Ouest, les deux Régions anglophones du Cameroun en proie à une guerre de sécession.  Ces spectacles désolants vécus depuis cette semaine dans la partie occidentale du pays, sont les conséquences des menaces proférées par les sécessionnistes. A travers des tracts et autres moyens de communication, les combattants sécessionnistes ont demandé à la population de partir loin des deux Régions pour ne pas être comptées parmi les victimes de l’assaut final qu’ils vont lancer d’ici la fin de ce mois de septembre 2018 contre les «forces d’occupation», parlant ainsi des Forces de Défense et de Sécurité du gouvernement camerounais.  «Nous ne pouvons plus supporter. C’est grave. Il ne se passe pas un jour sans qu’on ne soit menacé. Malgré les discours des autorités qui vont dans le sens de nous rassurer, la réalité sur le terrain est toute autre chose. Les sécessionnistes assassinent et violent nos proches quand ils veulent et comme ils veulent. Je préfère amener ma famille ailleurs en attendant que la paix revienne» explique Jude Njie, qui a quitté Kumba, avec femme et enfants pour une famille d’accueil au quartier PK 12 à Douala.  Afin de mettre un terme à l’exode massif des populations, le Gouverneur de la Région du Sud-Ouest, Bernard Okalia Bilai, s’est rendu ce samedi 15 septembre 2018 à la gare routière de Mile 17, sise à l’entrée de la ville de Buea, chef-lieu de la Région du Sud-Ouest. Au milieu d’une foule de voyageurs, il a tenté de dissuader les fuyards qui ont décidé d’abandonner leur domicile et certains biens pour des localités sûres. | | | | | | | | | | | | | | | |  |
|  |  |
|  |  |
|  |  | | | | | | | | | | | | | | | |  |
|  | | | | | | | | | | | | 9 |  | CP |  | 12/6/2022 1:54 AM |  |
|  | L’accès aux boutiques et magasins du Bamenda Main Market a été refusé aux commerçants la semaine dernière.  Durant la première moitié de la semaine dernière, les activités commerciales ont été bloquées dans la ville de Bamenda. Cette fois, la fermeture n’était plus liée aux villes mortes décrétées par les Ambazoniens mais à une décision administrative. En effet, des éléments des forces armées camerounaises, sur instruction de la plus haute autorité régionale, ont bloqué toutes les entrées du marché principal de Bamenda, empêchant ainsi les commerçants de s’acquitter de leurs tâches quotidiennes.  Après l’observance de la journée-ville fantôme habituelle du lundi 27 août 2018, les commerçants ont été surpris à leur arrivée le mardi de constater que les entrées étaient bloquées. Identique le lendemain mercredi. Le gouverneur leur reproche de continuer à suivre le mot d’ordre antirépublicain alors que les enseignants et les avocats qui les ont précipités dans la grève ont depuis lors jeté l’éponge, et pour beaucoup, repris leurs activités.  Des dirigeants de syndicats de commerçants ont été convoqués à une rencontre de mise au point le mercredi 29 au bureau du gouverneur du Nord-Ouest. Au cours de la réunion qui s’est tenue à huis clos, le Jour a appris qu’ils ont été informés des menaces que l’administration compte mettre à exécution s’ils persistent dans leur entêtement à suivre les injonctions des sécessionnistes.  Le marché a été rouvert mais les commerçants redoutent les mesures de rétorsion que les rebelles pourraient à leur tour prendre à l’endroit des récalcitrants et ce, malgré tout le déploiement sécuritaire envisagé. Ici, l’on rappelle les incendies ciblés dans ces marchés, contre des commerçants qui tout en fermant boutique, jonglaient avec le mot d’ordre de paralysie économique. On attend ce jour, lundi 3 septembre 2018 avec la rentrée scolaire 2018/2019, pour savoir si les menaces de l’autorité administrative vont changer la donne. Des écoles ont été incendiées pour réduire les chances de redémarrage. Déjà l’on craint une escalade chez les rebelles car « Bamenda n’est pas Buéa ».  En mémoire de ce qui est arrivé à Paul Atanga Nji, lorsqu’il n’était pas encore Ministre de l’Administration territoriale, l’on explique que le bouillant maire du chef-lieu du Sud-Ouest | | | | | | | | | | | | | | | |  |
|  |  |
|  |  |
|  |  | | | | | | | | | | | | | | | |  |
|  | | | | | | | | | | | | | | | | | |
| Reports\\Coding Summary By Node Report | | | | | | | | | | Page 28 of 140 | | | | | | | |
| 1/21/2023 3:37 PM | | | | | | | | | | | | | | | | | |
|  | | | **Aggregate** |  | **Classification** |  | **Coverage** |  | **Number Of Coding References** | |  | **Reference Number** |  | **Coded By Initials** |  | **Modified On** |  |
|  | | | | | | | | | | | | | | | | | |
|  | | | | | | | | | | | | 10 |  | CP |  | 12/7/2022 12:33 AM |  |
|  | La région vit dans la peur malgré les multiples couvre-feux.  Le gouverneur de la région du Nord-Ouest, Adolphe Lélé Lafrique, a pris une décision ce 18 février 2018 de prolonger d’une semaine le couvre-feu dans sa région de commandement. Le couvre-feu qui vient d’être rallongé, avait débuté le 9 février 2018 suite à l’assassinat des deux gendarmes à Mbingo (région du Nord-Ouest) le 1er février et un militaire au Commercial Avenue de Bamenda le 9 février 2018.  Pendant cette période du couvre-feu, les mouvements des personnes et des biens sont strictement interdits de 20 heures à 6 heures du matin, la circulation des motocyclettes est «complètement» suspendue. De même, tous les débits de boissons, les snack-bars et les boîtes de nuit, resteront fermés.  Le gouverneur invite tous ceux qui désirent se rendre dans la région ou bien la quitter, de le faire bien « avant 20 heures ». Le patron de la région relève que ces mesures ne sont pas applicables aux autorités administratives ainsi qu’aux forces de sécurité.  L’autorité administrative, qui a déjà eu à décréter, de manière par ailleurs très peu suivie, la même mesure, a mis en garde tout contrevenant à ces directives, qui sera puni selon les lois en vigueur.  Malgré le couvre-feu instauré le 9 février 2018, des hommes armés avaient attaqué l’arrondissement de Batibo dans la matinée du 11 février 2018 et avaient enlevé le sous-préfet de la localité qui est jusqu’à présent entre leurs mains. | | | | | | | | | | | | | | | |  |
|  |  |
|  |  | | | | | | | | | | | | | | | |  |
|  | | | **Internals\\Bamenda Online articles** | | | | | | | | | | | | | |  |
| No |  |  |  | 0.0088 |  | 7 | |  | | | | | |
|  | | |  |  |  |  |  |  |  | |  | | | | | | |
|  | | | | | | | | | | | | 1 |  | CP |  | 12/8/2022 1:28 AM |  |
|  | The Governor made a stop over at the GBTTC Bamenda on his way to Fundong. The visit is to asses the level of participation of pupils and the security of the candidates. Several pupils are not sitting for the examination due to the ongoing teachers' strike that began last November 21, 2016 and that has spiral over into a general socio-political crisis known today as the Anglophone Crisis. | | | | | | | | | | | | | | | |  |
|  |  | | | | | | | | | | | | | | | |  |
|  | | | | | | | | | | | | 2 |  | CP |  | 12/8/2022 1:31 AM |  |
|  | Government officials in Bamenda are busy scratching their heads and revising their ENAM notes as another ghost town brings to nullity another highly publicized and anticipated government school reopening in the region in the midst of the ongoing Anglophone crisis. Despite the presence of the minister of Basic Education in town, another strong statement of defiant has been sent to Yaoundé.  A quick drive downtown Bamenda and a visit to some of the schools this morning tells a different story. It’s a complete shut down in the business district, banks, offices, and markets closed. Intriguing is the Bamenda City Council controlled markets, Ntarikon, Main Market and Food market gates are wide open but there is not a single soul in the lockups to sell or to buy despite threats from the government delegate to close indefinitely any shed that respects the ghost town.  Our reporters spotted a few children at the GBHS Bamenda, all in assorted dresses and some in their uniforms in cars, heading into town.  The minister of Basic Education is due to hold a launching at the Bamenda Grand Stand later this morning, while the SG of the ministry of Secondary Education would hold a similar event at 10 am on the campus of GBHS Down Town-Bamenda. | | | | | | | | | | | | | | | |  |
|  |  |
|  |  | | | | | | | | | | | | | | | |  |
|  | | | | | | | | | | | | 3 |  | CP |  | 12/8/2022 1:35 AM |  |
|  | The call for three days of ghost town forced on the populations of the Northwest and Southwest regions have witnessed a downward trend in week two.  The ghost town usually leaves the streets of Bamenda quiet with total blackout to business activities, a general silence around markets and its surrounding areas, handful of commercial motor bikes and a couple of taxis if any, plying the roads  The situation witnessed a change this week with more economic activities witnessed particularly around markets. More Yellow caps were visible on the streets particularly on the third day. The thia slow pick up of commercial activities some inhabitants say is due to the increase in frequency of ghost town days from one to three in a single week. | | | | | | | | | | | | | | | |  |
|  |  |
|  |  | | | | | | | | | | | | | | | |  |
|  | | | | | | | | | | | | 4 |  | CP |  | 12/8/2022 1:45 AM |  |
|  | The order goes further to warn business men and persons ploughing the Manyu river to “suspend all activities still further notice” and for all motor bike riders “to strictly observe without provocation the suspension of their circulation from 7pm to 6am daily | | | | | | | | | | | | | | | |  |
|  |  | | | | | | | | | | | | | | | |  |
|  | | | | | | | | | | | | 5 |  | CP |  | 12/8/2022 1:47 AM |  |
|  | A night curfew from 8 pm to 6 am has been declared over the entre Northwest Region from today, February 10th to Saturday February 17, 2018 renewable. The curfew declared by Northwest Governor Lele Lafrique Cheffo Deben Adolphe follows to days of heighten tension in Bamenda after the killing of a soldier by unidentified individuals on Thursday February 8, at the commercial Avenue and the fatal shooting of a commercial bike rider and his passenger by a gendarmerie patrol team n the wee hours of the same day.  The order restricts all forms of movement of goods and persons across the entire region as from 8 pm to 6 am for a period of one week renewable.  It prohibits the movements of vehicles and persons and calls on transport agencies to leave town before 8 pm and all arrival possible only after 6 am. | | | | | | | | | | | | | | | |  |
|  |  |
|  |  | | | | | | | | | | | | | | | |  |
| Reports\\Coding Summary By Node Report | | | | | | | | | | Page 29 of 140 | | | | | | | |
| 1/21/2023 3:37 PM | | | | | | | | | | | | | | | | | |
|  | | | **Aggregate** |  | **Classification** |  | **Coverage** |  | **Number Of Coding References** | |  | **Reference Number** |  | **Coded By Initials** |  | **Modified On** |  |
|  | | | | | | | | | | | | | | | | | |
|  | | | | | | | | | | | | 6 |  | CP |  | 12/12/2022 12:38 AM |  |
|  | Both men were accompanied by Hon. Enwe Francis of Momo West at a press gathering this afternoon at the Ayaba Hotel Bamenda to ask the media in the region to continue to sensitize the population to shun fear and send their children back to school. The call comes after schools failed to effectively kick off in the Northwest region due to the ongoing Anglophone crisis.  Senator Simon Achidi Achu of Mezam and his colleague Dingha Banyi Ignatius of Ngoketunja condemned in strong terms the ghost town that has completely paralysed economic activities in the region and the rampant burning of schools and government structures. They blamed the crisis | | | | | | | | | | | | | | | |  |
|  |  | | | | | | | | | | | | | | | |  |
|  | | | | | | | | | | | | 7 |  | CP |  | 12/9/2022 2:23 AM |  |
|  | The mention of school resumption to parents in the Northwest and Southwest regions of Cameroon during the wee days of the 2017/2018 academic year was a taboo, an absurdity of the times and an indication that your do not belong. Many joint the strike for the restoration of a professional education system where their children could be assured of a brighter future, the high rate of unemployment amongst Anglophones combated and the educational system improved upon. | | | | | | | | | | | | | | | |  |
|  |  | | | | | | | | | | | | | | | |  |
|  | | | **Internals\\Cameroon Tribune** | | | | | | | | | | | | | |  |
| No |  |  |  | 0.0452 |  | 39 | |  | | | | | |
|  | | |  |  |  |  |  |  |  | |  | | | | | | |
|  | | | | | | | | | | | | 1 |  | CP |  | 1/21/2023 1:03 AM |  |
|  | Ministers of Secondary and Basic Education plea for parents to send children to school fell on deaf ears. The streets of Bamenda were dry and void of people yesterday Monday January 9, 2017 expected date for the resumption of the second term of the 2016-2017 academic year. Be it at Bamenda I, II or III the school no students were found in the schools CT visited. On the streets one could hardly fine motorbikes, taxis or even private vehicles, markets were open but with no traders, all commercial activities were grounded | | | | | | | | | | | | | | | |  |
|  |  | | | | | | | | | | | | | | | |  |
|  | | | | | | | | | | | | 2 |  | CP |  | 1/21/2023 1:03 AM |  |
|  | The following is a press release from the Minister of Higher Education: “In keeping with the Highest Orientations contained in the address of the President of the Republic, Head of State on the 31 December 2016, in direct relation to the press release of the Prime Minister, Head of Government on the 5 January 2017, the Minister of Higher Education, President of the Inter-Ministerial Committee in charge of examining and proposing solutions to grievances raised by Teachers’ Trade unions, recalls that the 4 Ordinary session of the said instance will meet at the end of the Month of January 2017. Like | | | | | | | | | | | | | | | |  |
|  |  | | | | | | | | | | | | | | | |  |
|  | | | | | | | | | | | | 3 |  | CP |  | 1/21/2023 1:04 AM |  |
|  | Governor, AdolpheLeleLafrique on the field to reassure inhabitants of measures for life without stress in the City and neigbourhoods In the backdrop of uneasy calm, taxis, commercial motorcycles and interurban transport buses are back on the streets of Bamenda after the disorder that paralyzed economic activities on November 21 and 22 , 2016. Banks and shops whose doors were shot during the disorder are equally back to life with inhabitants going about their activities after days of stress during which trekking was in vogue with taxis, commercial motorcycles and interurban transport agencies off the streets. Violent outburst by some youths who erected | | | | | | | | | | | | | | | |  |
|  |  | | | | | | | | | | | | | | | |  |
|  | | | | | | | | | | | | 4 |  | CP |  | 1/21/2023 1:15 AM |  |
|  | Consortium of Parents with children in some mission academic schools claim FCFA 150 billion from respective officials accused for refusing to teach their children. Anew development has emerged in the anglophone crisis with some church leaders and college principals summoned to appear before the Bamenda and Buea courts of 1st instance on April 21st, 2017. The direct summons at the request of a certain consortium of parents whose children are in some mission academic institutions want the Catholic Archbishop of Bamenda His Grace Cornelius Fontem Esua along with the president of the provincial Episcopal conference His Lordship George Nkuo, the principals of Sacred Heart college, St Bedes college and our Lady of Lourds college, the Executive President of the Cameroon Baptist Convention (CBC) Rev. Ncham Godwill and the Moderator of the PCC to answer charges which include.; failure | | | | | | | | | | | | | | | |  |
|  |  |
|  |  | | | | | | | | | | | | | | | |  |
|  | | | | | | | | | | | | 5 |  | CP |  | 1/21/2023 1:20 AM |  |
|  | Day one of the 2017/2018 academic year started in Bamenda with few pupils and students showing up in special circumstances that featured stepped up security. Resumption of schools for the 2017/2018 academic year on September 4, 2017 showcased different phases in the North West region. Teaching and learning in examination classes resumed two weeks earlier in virtually all the Presbyterian Secondary Colleges in Bamenda and neighbourhoods. Meanwhile, Sacred Heart college and Our Lady of Lourdes College, Mankon started receiving students into hostels yesterday, 4th September. Elsewhere, Ecole De Champion primary and Nursery school in the neighbourhood of Up Station, Bamenda I Sub Division enrolled 70 of the expected 350 pupils on day one. | | | | | | | | | | | | | | | |  |
|  |  | | | | | | | | | | | | | | | |  |
|  | | | | | | | | | | | | | | | | | |
| Reports\\Coding Summary By Node Report | | | | | | | | | | Page 30 of 140 | | | | | | | |
| 1/21/2023 3:37 PM | | | | | | | | | | | | | | | | | |
|  | | | **Aggregate** |  | **Classification** |  | **Coverage** |  | **Number Of Coding References** | |  | **Reference Number** |  | **Coded By Initials** |  | **Modified On** |  |
|  | | | | | | | | | | | | | | | | | |
|  | | | | | | | | | | | | 6 |  | CP |  | 1/21/2023 1:23 AM |  |
|  | The Anglophone crisis has resulted in mass exodus of children to Francophone regions. Though schools are gradually going on in the Anglophone regions, the fear that they might be interrupted any time has pushed parents residing in Douala to retrieve their kids from schools in the Anglophone regions while some parents residing in the North West and South West regions have sought refuge for their kids in relations in Francophone regions. The situation has made good business for schools in the Francophone regions while those in the Anglophone regions are left to the mercy of God. In Douala, most primary and secondary schools in Bonaberi (neighbourhood where most Anglophones reside) are jammed to capacity. Private and mission schools have taken advantage of the situation to enrol more pupils and students leading to overcrowding in classrooms | | | | | | | | | | | | | | | |  |
|  |  |
|  |  | | | | | | | | | | | | | | | |  |
|  | | | | | | | | | | | | 7 |  | CP |  | 1/21/2023 1:23 AM |  |
|  | Two weeks have gone past since the 2017/2018 Academic Year flung open its doors. In the three troublesome regions of the North West, South West and Far North, the dust of uncertainty is yet to completely settle. The atmosphere continues to be charged with fear; fear of the unknown. This state of affairs is, of course, not abnormal considering the pre-school crises that rocked the three regions. The situation in the Far North Region dates back to about 2014 with the resurgence of the Boko Haran insurgence. The escalation of attacks resulted in the closure of schools, some schools hosting internally displaced students, destruction of school infrastructure, barriers to school enrolment and fleeing of education personnel among others. The situation was different as concerns the North West and South West Regions. | | | | | | | | | | | | | | | |  |
|  |  | | | | | | | | | | | | | | | |  |
|  | | | | | | | | | | | | 8 |  | CP |  | 1/21/2023 1:24 AM |  |
|  | The Administration is sparing no effort to enable safe learning and teaching in schools. Following a coordinating meeting summoned early August by the South West Governor, Bernard Okalia Bilai, boarding schools in particular as well as all schools were assured of State protection against attacks and calls for school boycott by invisible persons. Two weeks into the 2017-2018 academic year, calm and serenity are evident in the various Divisional headquarters of the six administrative zones (Divisions) of the Region. With no major incident reported so far, special surveillance is being mounted around boarding schools of the Catholic, Presbyterian, Baptist, and Lay Private ownership. Day schools, both public and private, are also under scrutiny against any attempts of intimidation, harm and destruction | | | | | | | | | | | | | | | |  |
|  |  | | | | | | | | | | | | | | | |  |
|  | | | | | | | | | | | | 9 |  | CP |  | 1/21/2023 1:28 AM |  |
|  | Governor Bernard Okalia promised special security measures for dormitory schools. Authorities of the South West Region are on their heels organizing holiday classes and drumming school return come next month. Senior Divisional Officers, Mayors, Heads of the Forces of Law and Order, Education Delegates, Education Secretaries and School Principals of the South West Region are, each in their spheres, combing their areas to animate school re-opening come September 4. They met last 2 August in Buea, Regional headquarters, convened by the Regional Governor, Bernard Okalia Bilai, to weave strategies for schools resumption on 4 September, 2017. It was resolved at the important meeting held in the Governor’s conference room in Buea that all living forces in the Region should put hands on deck so that | | | | | | | | | | | | | | | |  |
|  |  | | | | | | | | | | | | | | | |  |
|  | | | | | | | | | | | | 10 |  | CP |  | 1/21/2023 1:29 AM |  |
|  | Governor Adolphe Lele Lafrique prescribes best practices for effective resumption of schools at Regional Administrative, security forum. The persistent Anglophone crisis is not helping matters in efforts to ensure the effective resumption of schools for the 2017/2018 academic year in the North West and it is against this backdrop that Governor, Adolphe Lele Lafrique has told education stake holders that posterity will judge them and children will hold them responsible if they fail to act responsibly in times like this. The event was the Regional administrative and security coordination meeting in Mbengwi, Momo Division on August 9th, 2017 where the governor; hailed religious and traditional leaders, elite and all stakeholders working to stabilize things for normalcy to give education and development a chance in the region. | | | | | | | | | | | | | | | |  |
|  |  | | | | | | | | | | | | | | | |  |
|  | | | | | | | | | | | | 11 |  | CP |  | 1/21/2023 1:45 AM |  |
|  | Parents and Forces of Law and Order were determined to ward off any threats. Some 11.846 candidates who registered for the 2018 Common Entrance Examination in the South West Region have sat for the exam in 98 centres across the Region. Equally, the “Entrée en Sixième”, Francophone equivalent of the Anglophone Common Entrance was also being written in the region. For security reasons, the number of centres was technically down-scaled from over two hundred as was in the previous years. The Regional Delegate for Basic Education, Mrs Motaze Dorothy Atabong, set out to Limbe where she supervised the writing of this year’s Common Entrance. In Buea, seat of the Regional Administration, the Divisional Officer, Kouam Wokam Paul, made impromptu visits to the existing four exam centres in the vicinity to ascertain the security of the pupilcandidates. On the field, the D O | | | | | | | | | | | | | | | |  |
|  |  |
|  |  | | | | | | | | | | | | | | | |  |
|  | | | | | | | | | | | | 12 |  | CP |  | 1/21/2023 1:50 AM |  |
|  | 19 workers faced the Regional Disciplinary Board recently to defend selves against accusations of undue absences and abandonment of duty posts. An in-camera session of the Regional Disciplinary Board dropped curtains in Bamenda on November 15, 2018 with the suspension of salaries of some 15 civil servants and state workers. The session equally featured warnings for some four workers in the lump sum of a total 19 that were summoned to defend themselves in cases of undue absences and abandonment of duty posts. It emerged from the Board that the files concerned with suspended salaries have been forwarded to the Permanent Disciplinary Council in Yaounde. The Permanent Secretary at the Governor’s office, Lanyuy Harry presided at the Jury which came face to face with four of those summoned for hearing. | | | | | | | | | | | | | | | |  |
|  |  | | | | | | | | | | | | | | | |  |
| Reports\\Coding Summary By Node Report | | | | | | | | | | Page 31 of 140 | | | | | | | |
| 1/21/2023 3:37 PM | | | | | | | | | | | | | | | | | |
|  | | | **Aggregate** |  | **Classification** |  | **Coverage** |  | **Number Of Coding References** | |  | **Reference Number** |  | **Coded By Initials** |  | **Modified On** |  |
|  | | | | | | | | | | | | | | | | | |
|  | | | | | | | | | | | | 13 |  | CP |  | 1/21/2023 1:57 AM |  |
|  | Another school year has started and unfortunately the old demons of confusion are equally present. Pupils and students across the national territory will as from today 2 September 2019 meet their mates afters over three months of holidays during which they had time to commune with their parents, siblings, and friends. Some might have even taken off the time to learn a trade or something else that can be useful to them as they journey along the uncertain road to success. Sadly, this is proving difficult for some especially in the South West and North West Regions because of separatist calls for school boycott. In the past years the issue was most damaging in the Far North due to the Boko Haram activities incursions. Today, the situation in the two Anglophone regions is even more pathetic. While the disruption of schools in both localities by the strike actions of lawyers and teachers which started in 2016 degenerated into a political and eventually armed conflict, the youth have been treacherously caught | | | | | | | | | | | | | | | |  |
|  |  |
|  |  | | | | | | | | | | | | | | | |  |
|  | | | | | | | | | | | | 14 |  | CP |  | 1/21/2023 2:04 AM |  |
|  | Some 1000 pupils and students were on roll in day one of the 2019/2020 academic year in the North West admits ghost town and threats of schools boycott. Day one of school' resumption for the 2019/2020 academic year had little to show with few pupils, students and administrative staff braving threats to file out for the learning and teaching process in the North West Region. Prolonged ghost towns and lockdowns of the region's towns and villages did not help matters with those thirsty for education scared of threats from proponents of schools boycott following the socio, political and security crisis rocking the region. The Regional Delegate of Basic Education, Wambeng Wilfred Ndong is hopeful about improved enrolment statistics in the weeks ahead. He told Cameroon Tribune (CT) that day one of | | | | | | | | | | | | | | | |  |
|  |  | | | | | | | | | | | | | | | |  |
|  | | | | | | | | | | | | 15 |  | CP |  | 1/21/2023 2:04 AM |  |
|  | Given that yesterday was the first day in school, Governor Okalia Bilai expressed satisfaction at the attendance and hoped the turnout will increase. Some pupils and students in the South West Region yesterday, Monday September 2, 2019, joined their peers nationwide to begin classes for the academic year 2019/2020. At Government Nursery and Primary School Man’O War Bay in Limbe III Municipality, songs of learning welcomed the South West Governor, Bernard Okalia Bilai and education family accompanying him. The Governor also supervised teaching and learning at Government Technical College Bimbia, SONARA Nursery and Primary School: and College, Presbyterian Girls Secondary School Limbe, Regina Pacis College Muntenge, Baptist High School Buea and Presbyterian Comprehensive Secondary School Buea. At each of the schools visited, Bernard | | | | | | | | | | | | | | | |  |
|  |  |
|  |  | | | | | | | | | | | | | | | |  |
|  | | | | | | | | | | | | 16 |  | CP |  | 1/21/2023 2:04 AM |  |
|  | More pupils and students are becoming enthusiastic about returning to school as well as parents and guardians are braving fear. Four days into the 2019-2020 school year, the North West Region is yet to experience that explosive vitality that characterise school campuses before the onset of the socio-political and security crisis. By yesterday enrollment in basic education schools in the region rose to 5,062 from less than 1,000 on day one of school reopening. Basic Education Delegate for the region, Wilfred Wambeng Ndong Kimbung, expresses the need for more enthusiasm in parents to send their children to school. "In Bamenda, there is little enthusiasm; only schools that opened their doors on Monday have remained functional, no other school has reopened," he told CT, noting with regrets that teacher attendance has remained discouraging. He called on teachers to be present on campuses every school day as a away of encouraging parents to send children to school. "Even if pupils have not come let teachers be present," he advised. For secondary schools where there is also some improvement in attendance on the close to 500 students registered on day one, no information is being disclosed at the level of the Regional Delegation in Bamenda, | | | | | | | | | | | | | | | |  |
|  |  |
|  |  | | | | | | | | | | | | | | | |  |
|  | | | | | | | | | | | | 17 |  | CP |  | 1/21/2023 2:08 AM |  |
|  | Students, pupils enjoy hitch-free studies in the regional capital, whereas most village campuses are still shut down. Some nursery, primary and secondary schools in the North West regional capital Bamenda have effectively started a crucial Second Term of their annual programme for 2019-2020. The term which enters the week two today in the region is considered crucial and most intense of the academic calendar, whereby teachers, pupils and students are determined to play their respective roles to ensure success at the end of the academic year. Among the schools CT visited beginning with day one which in the region was on January 7, 2020 (instead of January 6, 2020 as it was in other regions of the country) to the end of last week, comprise public and private institutions, many of whose administration spoke to CT on condition of being anonymous both themselves and their institutions. Pupil, student and | | | | | | | | | | | | | | | |  |
|  |  |
|  |  | | | | | | | | | | | | | | | |  |
|  | | | | | | | | | | | | 18 |  | CP |  | 1/21/2023 2:11 AM |  |
|  | Au 8e jour du second trimestre, élèves et étudiants attendent toujours de reprendre les classes. La seconde phase des travaux du Comité interministériel ad hoc chargé d’examiner et de proposer des solutions aux préoccupations soulevées par les syndicats d’enseignants anglophones s’est achevée tard dans la nuit de vendredi à samedi avec l’examen de 20 points, contre 11 qui figuraient préalablement au rang des revendications. Le gouvernement avait alors accepté d’élargir le champ des discussions à d’autres points présentés par les syndicats d’enseignants anglophones. Avant l’ouverture des travaux de jeudi dernier, une vingtaine de personnes, interpelées au cours des événements violents du 8 décembre 2016 à Bamenda avaient recouvré la liberté. Des signes qui laissaient présager d’une décrispation de l’atmosphère pour la suite des discussions entre le gouvernement et les syndicats. Un premier indice avait été observé lors des travaux du Comité interministériel ad hoc de la semaine dernière présidé par le Pr. Ghogomu Paul Mingo, par ailleurs, directeur de Cabinet du Premier | | | | | | | | | | | | | | | |  |
|  |  |
|  |  | | | | | | | | | | | | | | | |  |
|  | | | | | | | | | | | | | | | | | |
| Reports\\Coding Summary By Node Report | | | | | | | | | | Page 32 of 140 | | | | | | | |
| 1/21/2023 3:37 PM | | | | | | | | | | | | | | | | | |
|  | | | **Aggregate** |  | **Classification** |  | **Coverage** |  | **Number Of Coding References** | |  | **Reference Number** |  | **Coded By Initials** |  | **Modified On** |  |
|  | | | | | | | | | | | | | | | | | |
|  | | | | | | | | | | | | 19 |  | CP |  | 1/21/2023 2:17 AM |  |
|  | Security forces conspicuous to protect people and property in schools that featured teachers and students of the francophone subsystem of education. "A majority of teachers and administrative staff of especially public schools were present on January 23rd, 2017 and a few classes were effective in GBHS Ntamulung and GBHS Bamenda. There were some 60 students present." That is how the North West Regional Delegate for Secondary Education, Victor Mohbakwed sized up the situation in Bamenda yesterday Monday January 23. In effect, the teaching and learning process was not the best on the day scheduled for schools to effectively reopen for the 2nd term of the 2016 /2017 academic year in the North West Region. Most schools remained shut and uniforms were rare to find following the strike action called by Anglophone Teachers Trade Union since November 21, 2016. Forces of law and order were conspicuous | | | | | | | | | | | | | | | |  |
|  |  |
|  |  | | | | | | | | | | | | | | | |  |
|  | | | | | | | | | | | | 20 |  | CP |  | 1/21/2023 2:18 AM |  |
|  | Schools resumed timidly in the South West Region yesterday January 23, 2017 following the Ministerial Order of last week countering the ghost school syndrome that had kept pupils and students at home for close to two months. News from the various Divisions spoke of grounded activities especially the lack of taxis in the streets, closed stores and claims of fear of the unknown. In Ndian Divisional Headquarters of Mundemba, tract distributors were arrested by the forces of law and order in the early morning of yesterday. In Lebialem, reports talked of deserted schools though some teachers were present in the campuses. In Kumba, Meme Divisional capital, Mr. Fon Ndikum, the Secretary General at the South West Governor's office, toured the various schools accompanied by the Divisional Etat-major and met mainly the teachers. In the cases of bilingual institutions, francophone students were available for classes. | | | | | | | | | | | | | | | |  |
|  |  |
|  |  | | | | | | | | | | | | | | | |  |
|  | | | | | | | | | | | | 21 |  | CP |  | 1/21/2023 2:20 AM |  |
|  | Parents suffer the extra burden of having children of school going age away from school. From the look of things, pupils and students who have not resumed school since the teacher's trade union strike was called are the uninvited guests in many homes in Bamenda and neighbourhoods. On the streets and on the corridors of many homes, it is on most lips that such school children have become an extra burden. Parents are counting the cost with alot to show in inconveniences and extra efforts to keep them at home away from their natural academic environment. Cynthia Ngang, in the neighbourhood of Nkwen is at a loss on what to do with her 15-year-old son J. John, a student of a boarding school in Bamenda. In the absence of academic activities, she finds it difficult holding John back at home without any comprehensive insurance coverage for security in the neighbourhoods. That is the same story for many children who go on playing football | | | | | | | | | | | | | | | |  |
|  |  |
|  |  | | | | | | | | | | | | | | | |  |
|  | | | | | | | | | | | | 22 |  | CP |  | 1/21/2023 2:20 AM |  |
|  | Fear continues to dominate English subsystem as fewer students are present in classrooms. Taxis and commercial motorcycles returned to the streets of Bamenda since Wednesday, January 25, 2017 after two days, Monday and Tuesday that witnessed another stressful ghost town experience. Life gradually returned to the city and neighbourhoods that spent January 23rd and 24th with markets and shops shut. Inter-urban transport vehicles once more hit the roads while snack bars, off licences and liquor houses resumed business activities. The situation did not however encourage the resumption of schools for the English subsystem of education in virtually all the schools. The difference continues to be in GBHS Bamendankwe in the neighbourhood of Up-station where timid academic activities took place in the francophone subsystem. On the spot in campus, is the presence of security forces to protect students and property. | | | | | | | | | | | | | | | |  |
|  |  |
|  |  | | | | | | | | | | | | | | | |  |
|  | | | | | | | | | | | | 23 |  | CP |  | 1/21/2023 2:20 AM |  |
|  | Activities have returned to normal in Buea after the two days of ghost town early last week. Taxis are back on the streets and businesses are open once more Some students, mostly Francophones, attend school regularly unperturbed. The only irk is the absence of internet which has slowed down business in the South west regional capital. On Saturday night, there was effervescence in the streets of Buea after the Lions victory over Senegal in the quarter finals of the ongoing Africa Cup of Nations in Gabon. People shouted excitedly while some vehicles blasted their horns in sign of jubilation. However, it is not known for how long this good mood will prevail as there are rumours the ghost town strike action will continue today and tomorrow. In preparation to counter the strike action, the Mayor of Buea has bought a consignment of taxis to do transportation in case taxi drivers adhere to the boycott of activities. Last week | | | | | | | | | | | | | | | |  |
|  |  |
|  |  | | | | | | | | | | | | | | | |  |
|  | | | | | | | | | | | | 24 |  | CP |  | 1/21/2023 2:23 AM |  |
|  | A total of 2,432 students of the francophone subsystem have received 197 lessons from 1,141 teachers so far in the region. Records about the resumption of schools in the North West Regional Delegation of Secondary Education indicate that out of the 11,533 students expected in some 222 secondary schools, 2,432 are receiving lessons as at January 30, 2017.The Regional Delegate Mombakwed Victor told CT that a majority belong to the francophone subsystem with 197 lessons so far received from 1,411 teachers out of 2,937 expected. Daily control sheets at the Regional Delegation reveal a positive trend for students in the English subsystem with 149 present for classes at GBHS Downtown Bamenda and 38 at GBHS Bayelle on Tuesday January 31. Elsewhere; Mombakwed Victor said some colleges in the Elak- Oku area, Kumbo, Ndop, | | | | | | | | | | | | | | | |  |
|  |  |
|  |  | | | | | | | | | | | | | | | |  |
|  | | | | | | | | | | | | | | | | | |
| Reports\\Coding Summary By Node Report | | | | | | | | | | Page 33 of 140 | | | | | | | |
| 1/21/2023 3:37 PM | | | | | | | | | | | | | | | | | |
|  | | | **Aggregate** |  | **Classification** |  | **Coverage** |  | **Number Of Coding References** | |  | **Reference Number** |  | **Coded By Initials** |  | **Modified On** |  |
|  | | | | | | | | | | | | | | | | | |
|  | | | | | | | | | | | | 25 |  | CP |  | 1/21/2023 2:31 AM |  |
|  | Philemon Yang a dialogué vendredi et samedi derniers avec les leaders syndicaux du corps enseignant et des avocats. Un agenda élaboré pour mettre un terme à la grève des enseignants. Pendant de longues heures les 25 et 26 novembre 2016, le Premier ministre, chef du gouvernement, Philemon Yang, a échangé à Bamenda avec les forces vives de la région du Nord-Ouest pour un retour à la paix. C’était au lendemain du mouvement insurrectionnel qui a paralysé Bamenda le 21 novembre 2016, dans un contexte marqué par la grève des enseignants et des avocats. Pour y mettre un terme, le chef du gouvernement en personne est descendu sur le terrain. Accompagné du gouverneur de la région du Nord-Ouest, Adolphe Lele Lafrique, et du directeur de cabinet du Premier ministre, Pr Paul Ghogomu, le chef du gouvernement a eu de longs entretiens avec des délégations séparées de leaders syndicaux du corps enseignants, des avocats, des hommes d’église, des hommes politiques, des responsables de la société civile, des chefs traditionnels, des journalistes et des moto-taximen. En ce qui concerne la grève déclenchée par des syndicats d’enseignants, certains leaders syndicaux ont déclaré au reporter de CT sur place qu’un agenda comportant huit points a été adopté pour baliser la voie qui conduira à une suspension du mouvement de | | | | | | | | | | | | | | | |  |
|  |  |
|  |  | | | | | | | | | | | | | | | |  |
|  | | | | | | | | | | | | 26 |  | CP |  | 1/21/2023 2:45 AM |  |
|  | Life has been normal in the town since the visit of the Secretary General of the CPDM Central Committee to Buea. Some schools in the town of Buea have gone operational after the upheavals that took place in Buea and Bamenda, which led to the semi closure of certain schools because teachers deserted the classrooms. Most of the schools that are functioning normally are mostly the government secondary schools and primary schools. Apart from the educational sector, the normal day to day live the town used to have is back and it seems nothing ever went wrong. The business places around the town open on a daily basis, markets remain open on their normal days and the population goes in and out to buy various items that they need. Talking to some individuals, they believe dialogue with the government is the beginning of a lasting solution to any of the problems that are being posed. They added that the government must take decisive steps that will bring lasting solutions. Others think that the government should sort out the problems on the table in good faith by telling the Anglophones the truth. Another inhabitant | | | | | | | | | | | | | | | |  |
|  |  |
|  |  | | | | | | | | | | | | | | | |  |
|  | | | | | | | | | | | | 27 |  | CP |  | 1/21/2023 3:04 AM |  |
|  | Activities went normal yesterday as could be seen in all corners of the city. The City of Buea opened their week yesterday, Monday, in relative calm with the various government administrative offices open and receiving the public. Although schools were still not functional due to the strike action, public places were as busy as usual. As the Teachers prepare for their dialogue with Government any time soon the City of Buea is busy with markets and road-side stores open. Taxis were plying the streets to all corners of the town. The Regional Hospital and District Health Units of Muea and Buea Town were all attending to patients. Although discussions in the various offices and gatherings were, in the main, centred on the ghost-school deadlock, all hopes are that the impasse be resolved as soon as possible for pupils and students to resume classes. The | | | | | | | | | | | | | | | |  |
|  |  |
|  |  | | | | | | | | | | | | | | | |  |
|  | | | | | | | | | | | | 28 |  | CP |  | 1/21/2023 3:07 AM |  |
|  | C’est ce qui se dégage des deux jours de débats du Comité ad hoc présidé par le ministre Jean Pierre Fogui. Le Comité ad hoc chargé d’examiner et de proposer des solutions aux préoccupations des avocats anglophones a bouclé ses travaux hier. Deux jours de débats entre les 15 membres, sous la présidence de Jean Pierre Fogui, dans un climat de sérénité, de consensus et de responsabilité. Selon la déclaration du président du Comité, rendue publique à l’issue des discussions, les résolutions prises à l’issue de l’examen des cinq points inscrits à l’ordre du jour, seront transmises au Premier ministre, chef du gouvernement, pour appréciation. Toutefois, les travaux ont été suspendus hier en début d’après-midi, avant d’être repris plus tard. La raison ? La demande de rétablissement des associations d’avocats qui ont fait l’objet de dissolution ou d’interdiction par arrêtés préfectoraux dans le Nord-Ouest et le Sud-Ouest et d’élargissement | | | | | | | | | | | | | | | |  |
|  |  |
|  |  | | | | | | | | | | | | | | | |  |
|  | | | | | | | | | | | | 29 |  | CP |  | 1/21/2023 3:39 AM |  |
|  | C’est le souhait exprimé par les parents, élèves et étudiants, qui invitent les parties prenantes au dialogue pour aplanir leurs divergences et trouver des solutions concrètes aux problèmes posés. A Bamenda, chef-lieu de la région du Nord-Ouest, la vie suit son cours normal, après les tristes événements du 21 novembre et du 8 décembre derniers. Un tour effectué dans la ville hier en mi-journée a permis de constater que les forces de maintien de l’ordre sont présentes à certains endroits. Les activités économiques tournent cependant à plein régime. A l’avenue dite commerciale, les boutiques, magasins et agences bancaires sont ouverts et les transactions s’effectuent sans entraves | | | | | | | | | | | | | | | |  |
|  |  | | | | | | | | | | | | | | | |  |
|  | | | | | | | | | | | | 30 |  | CP |  | 1/21/2023 3:39 AM |  |
|  | Life and business activities go on normally in the city of Bamenda. As members of the ad hoc committee ended deliberations in Bamenda on Tuesday December 27, 2016, with cabinet ministers already back to work in Yaounde, anxiety is mounting in the city for schools to resume. Parents, education stakeholders and students have expressed the wish for lasting solutions to be found for effective classes to recommence early January. The city of Bamenda is bustling with its normal commercial activities as security forces are stationed in major road junctions of the North West Regional capital. Even though parents and students expressed the desire to see schools reopen their doors, their greatest expectation is for both parties to dialogue for a consensus. Parents however stated that without dialogue and solutions proffered, they will hold back their kids for the fear of the unknown. Parents, | | | | | | | | | | | | | | | |  |
|  |  |
|  |  | | | | | | | | | | | | | | | |  |
|  | | | | | | | | | | | | | | | | | |
| Reports\\Coding Summary By Node Report | | | | | | | | | | Page 34 of 140 | | | | | | | |
| 1/21/2023 3:37 PM | | | | | | | | | | | | | | | | | |
|  | | | **Aggregate** |  | **Classification** |  | **Coverage** |  | **Number Of Coding References** | |  | **Reference Number** |  | **Coded By Initials** |  | **Modified On** |  |
|  | | | | | | | | | | | | | | | | | |
|  | | | | | | | | | | | | 31 |  | CP |  | 1/21/2023 3:41 AM |  |
|  | While government and teachers’ trade union leaders were still meeting it was rumoured that the leaders had been taken hostage and forced to signed The social media is a veritable source of information but then can generate falsehood that can set a nation ablaze. In Cameroon, the social media has proven to pose more harm than good. This was the case last Friday in Bamenda when lies through the social media almost set the city ablaze. While the inter-ministerial Ad hoc committee meeting was going on at the Governor’s Office, rumours went wild in town around 8 p.m. that the teachers’ trade union leaders had been taken hostage and were forced to sign committee documents out of their will, some even said the trade union leaders have been beaten up. This information spread like wild fire and in less than no time some people went mounting barricades, as well as the burning tires on the road and the burning of cars. Some anxious youths stormed the Governor’s Office and were singing gospel songs. Due to the confrontation with | | | | | | | | | | | | | | | |  |
|  |  |
|  |  | | | | | | | | | | | | | | | |  |
|  | | | | | | | | | | | | 32 |  | CP |  | 1/21/2023 3:42 AM |  |
|  | Institutions of learning went dead again yesterday across the Region. In spite of the on-going dialogue engaged since the 27 December in Bamenda between Government and teachers’ syndicates to break the ghost school stalemate, schools failed to resume yesterday, 16 January in most of the South West Region. The strike action obliging pupils and students to stay away from schools embraced the second month, as schools remained empty and quiet as graveyards yesterday in most of the six Divisions of the South West Region. In Buea the Regional capital, Government and private primary, secondary and Higher Institutions received neither teachers nor learners ready for classes. A few Francophone students in uniform were spotted at the BGS Molyko-Buea by 10 am but the campus soon became dry before mid day. In Limbe it was the same scenario as no classes were held in the key schools situated on the major road sides. Cameroon Tribune made rounds in Limbe and Buea and observed no school taking effective classes. News from Lebialem Division spoke of ghost towns added to ghost schools in Menji. In Kumba, capital of Meme Division, the situation remained morose with no classes, | | | | | | | | | | | | | | | |  |
|  |  |
|  |  | | | | | | | | | | | | | | | |  |
|  | | | | | | | | | | | | 33 |  | CP |  | 1/21/2023 3:45 AM |  |
|  | Governor Adolphe Lele Lafrique sensitised Bui, Ngoketunjia Division to resume schools. Encouraging academic activities welcomed North West Governor Adolphe Lele L'Afrique to Oku Subdivision on Tuesday, February 7, 2017. The Governor who is on a sensitization tour to encourage schools to resume in Bui and Ngoketunjia Divisions saluted effective teaching and learning at GHS -Elak, Oku which showcased 318 purely English subsystem students out of 1,035 enrolled. The neighborhood of GS Keyon-Oku also featured some 74 out of 274 pupils receiving lessons. It was a happier Governor who left the schools to the Oku Community Radio Station where the facility was used to further crusade and mobilised the population to give their children a chance to return to school after the suspension of the strike action last Saturday February 4, 2017. The Governor was in Oku from GBHS Kumbo where some 31 English Subsystem students | | | | | | | | | | | | | | | |  |
|  |  |
|  |  | | | | | | | | | | | | | | | |  |
|  | | | | | | | | | | | | 34 |  | CP |  | 1/21/2023 3:51 AM |  |
|  | Against Suspects Below is the introductory statement of the Minister of Communication, Issa Tchiroma Bakary during a press briefing on February 15, 2017 “Ladies and Gentlemen, It is a great pleasure for me to wish you a warm welcome to this press briefing which I have invited you to update you on the judicial proceedings against some persons accused following the recent events in the South-West and North-West Regions. As you know, the events that I just mentioned unfortunately resulted, in some places, in acts of violence or led to cases of violation of the law, that have been referred before the courts, to hold each and everyone liable. As part of the legal action, 82 people were arrested, and 21 were subsequently released. Of the 61 persons still under detention, 31 are awaiting trial before the competent court, namely, the Yaoundé Military Court. It should be noted that among those awaiting trial, one of them is appearing freely. Concerning the trial which was opened at the Yaoundé Military Court on last February 13, | | | | | | | | | | | | | | | |  |
|  |  |
|  |  | | | | | | | | | | | | | | | |  |
|  | | | | | | | | | | | | 35 |  | CP |  | 1/21/2023 3:52 AM |  |
|  | Though some schools gates were widely open, pupils and students are still dragging their feet. Despite the most recent calls by PTA presidents, All Anglophone Teachers Trade Unions leaders as well as that of the Prime Minister Philemon Yang on Monday 6th March for parents to send their children to school on March 7th, most parents in the city of Bamenda are still hesitant to heed to the call. Some of them complained of threats from unidentified individuals while others hold that amnesty be granted to those arrested as a result of the strike. During a sojourn of some schools in Bamenda, CT discovered that some schools whose gates were shut all this while were now open with school administrators and teachers present but without pupils or students. In one of the private primary schools visited, CT spotted about 10 pupils receiving lessons. At GBHS Bamenda, the number of students attending classes have increased to about 1,016 students of both subsystems although the students of the Anglophone subsystem remain under 400. At PCHS Mankon no student came for classes but some students were seen registering for the GCE examination while both teaching and administrative staff watched on. At the Big Mankon | | | | | | | | | | | | | | | |  |
|  |  |
|  |  | | | | | | | | | | | | | | | |  |
|  | | | | | | | | | | | | 36 |  | CP |  | 1/21/2023 3:56 AM |  |
|  | were spotted during Court Sessions on May 2, 2017 in Bamenda Six months after Common Law Lawyers began their strike action, the Courts of Law in Bamenda are still in short supply of the men and women of the law. In effect, robes and Whigs were rare on May 2, 2017, the day Lawyers were expected to resume sessions. By 10 am, the North West Court of Appeal featured some two Lawyers. Meanwhile, Courts II and III of the Mezam High Court featured full Criminal Sessions with only two Lawyers present in both. The Cause list for Court II carried some 31 matters for the day’s hearings., Court I of the High Court was handling Preliminary Investigations in a case of aggravated theft | | | | | | | | | | | | | | | |  |
|  |  | | | | | | | | | | | | | | | |  |
|  | | | | | | | | | | | | | | | | | |
| Reports\\Coding Summary By Node Report | | | | | | | | | | Page 35 of 140 | | | | | | | |
| 1/21/2023 3:37 PM | | | | | | | | | | | | | | | | | |
|  | | | **Aggregate** |  | **Classification** |  | **Coverage** |  | **Number Of Coding References** | |  | **Reference Number** |  | **Coded By Initials** |  | **Modified On** |  |
|  | | | | | | | | | | | | | | | | | |
|  | | | | | | | | | | | | 37 |  | CP |  | 1/21/2023 4:08 AM |  |
|  | North West Governor, Adolphe Lele Lafrique comforts victims receiving treatment in Kumbo health facility Monday, September 4, 2017 was unusual in Kumbo, Bui Division where a confrontation between the Forces of Law and Order and the population turned ugly, leading to the erection of barricades on the streets, burnings, destruction of public property and the death of one person at press time. It all started in the neighbourhood of Mbiame, where some elements of the Bui Gendarmerie Company filed out, in search of suspected drug traffickers. It emerged from field reports that the arrested suspects were quick to alert armed accomplices who mobilized to rescue them. Reports have it that in an attempt to have the situation under control, the Gendarme elements wounded three of the suspects, one of whom later died while five Gendarmes also suffered injuries. In an attempt to carry the corpse towards Kumbo town the angry population was overpowered by the Forces of Law and Order, but the population moved on to burn the administrative block of GBHS Kumbo, vandalized some blocks and the Principal’s office at GSS Mbveh, vandalized windows of the SDO’s office as well as those of the Divisional | | | | | | | | | | | | | | | |  |
|  |  |
|  |  | | | | | | | | | | | | | | | |  |
|  | | | | | | | | | | | | 38 |  | CP |  | 1/21/2023 4:12 AM |  |
|  | One year already since the start of what is commonly called; «the anglophone crisis». It began on 10 October 2016 with claims from trade unionists, but it quickly transposed into the political arena. This was supported by the fact that some fellow compatriots whose confessed purpose was none other than the partition of Cameroon for the most extremists, or the revision of the present form of the State, saw it as a kind of panacea to the issues raised. In a context where the crisis seems to be sinking and where voices rise here and there, evoking henceforth and at any rate dialogue as a therapeutic shock to curb a symptomatically cancerous evil, one is tempted to rewind the hands of time for historical purposes, to the course of these last months whose milestones are more than indicative of what until then, the State through the President of the Republic, His Excellency Paul BIYA, has done on this matter. Let us review the history and the agenda of the last twelve months. The first pages of the month of September 2016, are well inscribed with trade unionists claims | | | | | | | | | | | | | | | |  |
|  |  |
|  |  | | | | | | | | | | | | | | | |  |
|  | | | | | | | | | | | | 39 |  | CP |  | 1/21/2023 4:18 AM |  |
|  | Among the measures, all traditional rulers must identify strangers and report to the administration regularly. Governor Bernard Okalia Bilai has ordered a series of measures to protect citizens, property and territorial integrity for the entire South West Region. In a communiqué number 139/L/G/SEC22/SP signed last Friday, 10 November, 2017, the Chief Executive of the Region prohibited the circulation of motorbikes within the hours of 7pm to 6am. Equally, all hunting activities with the use of fire-arms are suspended. The order also prohibits the use of fire-arms during traditional ceremonies like burials, funerals. All licenced armouries as well as the sale of fire-arms and ammunitions are prohibited henceforth. The Governor’s order calls on all owners of fire-arms, hunting rifles, locally fabricated guns or personal protection pistols to obligatorily present themselves to the Divisional Officer for identification | | | | | | | | | | | | | | | |  |
|  |  |
|  |  | | | | | | | | | | | | | | | |  |
|  | | | **Internals\\EcoMatin** | | | | | | | | | | | | | |  |
| No |  |  |  | 0.0238 |  | 5 | |  | | | | | |
|  | | |  |  |  |  |  |  |  | |  | | | | | | |
|  | | | | | | | | | | | | 1 |  | CP |  | 12/9/2022 2:43 AM |  |
|  | Son chiffre d’affaires est passé de 334,9 milliards de Fcfa en 2017 à 314,4 milliards de Fcfa en 2018, soit une baisse d’environ 20 milliards de Fcfa. C’est dans ce contexte difficile que l’assemblée générale des actionnaires de ce groupe va adopter les comptes de cet exercice, le 15 mai prochain à Douala. | | | | | | | | | | | | | | | |  |
|  |  | | | | | | | | | | | | | | | |  |
|  | | | | | | | | | | | | 2 |  | CP |  | 12/9/2022 2:49 AM |  |
|  | Dans une note au gouvernement, le directeur général de la CDC, Franklin Ngoni Ikome Njie a déclaré que « l’entreprise évolue en moins de 10% de ses capacités ». Au regard de l’insécurité qui prévaut dans la région « 12 000 employés ont été mis en chômage », ce qui représente 60% des effectifs. La CDC paye les frais de la crise qui secoue la partie anglophone du pays, ses plantations et usines étant installées dans la région du Sud-ouest. | | | | | | | | | | | | | | | |  |
|  |  | | | | | | | | | | | | | | | |  |
|  | | | | | | | | | | | | 3 |  | CP |  | 12/9/2022 2:51 AM |  |
|  | Dans un rapport récemment publié, l’Unicef dresse un bilan négatif de la crise anglophone sur le plan socio-économique. L’on apprend que depuis le début de la crise anglophone (depuis 3 ans déjà), des centaines de milliers d’enfants qui n’ont pas franchi le seuil des établissements scolaires : « Plus de 80% des écoles ont été fermées, touchant plus de 600 000 enfants », souligne le rapport.  Pour la même cause, le rapport indique que plus de 70 écoles ont été détruites ; et les enseignants et élèves de ces structures, victimes de violences physiques : « depuis 2018, plus de 300 élèves et enseignants ont été enlevés et relâchés après des expériences traumatisantes », a regretté Toby Fricker, le porte-parole de l’Unicef cité par le rapport, qui plaide par ailleurs pour une solution rapide et un encadrement sûr des enfants. Car « lorsque les enfants ne vont pas à l’école, ils courent un plus grand risque d’être recrutés par des groupes armés et sont plus susceptibles d’être exposés au mariage d’enfants, aux grossesses précoces, au traumatisme et à la détresse émotionnelle de longue durée que ces expériences entraînent ». | | | | | | | | | | | | | | | |  |
|  |  |
|  |  | | | | | | | | | | | | | | | |  |
| Reports\\Coding Summary By Node Report | | | | | | | | | | Page 36 of 140 | | | | | | | |
| 1/21/2023 3:37 PM | | | | | | | | | | | | | | | | | |
|  | | | **Aggregate** |  | **Classification** |  | **Coverage** |  | **Number Of Coding References** | |  | **Reference Number** |  | **Coded By Initials** |  | **Modified On** |  |
|  | | | | | | | | | | | | | | | | | |
|  | | | | | | | | | | | | 4 |  | CP |  | 12/10/2022 12:26 AM |  |
|  | L’éducation sous embargo  Six années de lutte armée contre l’extrémisme violent ont laissé un million d’enfants non scolarisés dans le Nord-Ouest, le Sud-Ouest et l’Extrême-Nord du Cameroun. Selon l’Ocha, le Bureau de coordination des Nations unies, le phénomène s’étend jusqu’au Littoral, l’Ouest, l’Adamaoua, qui accueillent une forte population déplacées du fait de l’instabilité dans les régions suscitées. Au cours des trois dernières années, au moins 70 écoles ont été détruites et des élèves et des enseignants ont été enlevés dans les deux régions anglophones où des manifestations corporatistes avaient débouché sur une crise politique en 2016. | | | | | | | | | | | | | | | |  |
|  |  | | | | | | | | | | | | | | | |  |
|  | | | | | | | | | | | | 5 |  | CP |  | 12/10/2022 12:35 AM |  |
|  | Toujours en avril 2019, indique l’Unoca, plus de 530 000 personnes ont été déplacées dans les deux régions anglophones du Cameroun et dans les régions du Littoral et de l’Ouest, et 35 858 personnes ont cherché asile au Nigéria. « Les fermetures d’écoles, les nombreux enlèvements d’élèves et d’enseignants, les restrictions à la liberté de circulation et les cas de violence sexuelle et fondée sur le genre ont contribué à instaurer un climat de peur et d’intimidation. Ce qui a eu des répercussions préjudiciables à l’économie locale et à l’accès aux services sociaux de base et augmenté considérablement les risques en matière de protection », déplore Bureau régional des Nations unies pour l’Afrique centrale.  Dans la prospective, l’organisme onusien prévoit que le nombre de personnes qui auront besoin d’une aide humanitaire au Cameroun en 2019 s’élèvera à environ 4,3 millions, soit une augmentation de 30 % par rapport à 2018.  https://ecomatin.net/securite-au-cameroun-lonu-prevoit-une-hausse-en-besoin-humanitaire | | | | | | | | | | | | | | | |  |
|  |  |
|  |  | | | | | | | | | | | | | | | |  |
|  | | | **Internals\\Eden Newspaper** | | | | | | | | | | | | | |  |
| No |  |  |  | 0.0212 |  | 10 | |  | | | | | |
|  | | |  |  |  |  |  |  |  | |  | | | | | | |
|  | | | | | | | | | | | | 1 |  | CP |  | 12/11/2022 12:13 AM |  |
|  | For three days from July 16, businesses were shutdown travellers were trapped at motorparks, perishables were rotting off in bags, wounded civilians unable to access medical care while the dead were quickly starched in mortuaries, as Amba boys and the military got entangled in a show of who controls the English Speaking Regions. Sporadic shooting from both sides kept the restive areas lifeless as people hid themselves in their houses for fear of getting hit by a stray bullet.  In the Northwest, hot zones were found in Bamenda in Mezam, Kumbo in Bui and Wum in Menchum where the elite forces strived like never before to content with the high power shooting coming from an ill equipped Ambazonia Defense Force.From information gathered from Wum, the Amba boys | | | | | | | | | | | | | | | |  |
|  |  |
|  |  | | | | | | | | | | | | | | | |  |
|  | | | | | | | | | | | | 2 |  | CP |  | 12/11/2022 12:19 AM |  |
|  | The  Senior  Divisional  Officer  for  Meme  division  in  the  South West  region,  Ntou’ou   Ndong  Chamberlin,  has  suspended  the  activities  of  motor bikes  and  drinking  establishments   like  bars, snack  bars  and  Nightclubs  from  9pm  to  5 am  till  further  notice.  The  decision   signed   on   Thursday 8  February 2018  by   the  Meme   SDO  which  copies  where  handed  to  Eden, states  that the  decision  is  due  to  the  persistent   threat against  social  peace  and  national   security especially  in  Meme  division   which  has  become   a  battle   field  between  the  Cameroon  defense  forces   and  the   Ambazonian  Defense   Forces,  ADF | | | | | | | | | | | | | | | |  |
|  |  |
|  |  | | | | | | | | | | | | | | | |  |
|  | | | | | | | | | | | | 3 |  | CP |  | 12/11/2022 12:46 AM |  |
|  | The traditional Monday ghost town which is being witnessed across the two English speaking regions in Cameroon, ushered in another gory face of alleged military brutality on the population and this time around  in the form of broad daylight rape of 17 year old girl in Bamenda. The Culprit by name Mbida Arthur was dragged to the military court to answer charges of rape and first appearance was next day Tuesday July 24. | | | | | | | | | | | | | | | |  |
|  |  | | | | | | | | | | | | | | | |  |
|  | | | | | | | | | | | | 4 |  | CP |  | 12/11/2022 12:47 AM |  |
|  | Following a spate of violence in Cameroon’s Anglophone regions which started since October 2016, the national inter-employers’ group conducted an investigation with companies operating in the areas.  Results published  13 September  showed that 86% of companies surveyed witnessed significant (36%) and very serious (50%) impact on business. The unrest has already cost CFA2.153 billion in real property, rolling stock and furniture while the turnover shortage is valued at CFA269.056 billion.  “This shortage in business turnover implies an immediate loss of CFA5.9 billion in government’s tax revenues, as a deposit of corporate tax [the rate of which is set at 2.2% calculated on turnover]”, Gicam pointed out.  In terms of job losses, agro-industrial companies are atop the list. Overall, nearly 8,000 jobs in the formal sector are threatened in addition to the 6,434 jobs already lost.  The group suggests to stabilize the security environment as to better control the situation and initiate peace restoring process across the country.  “It’s urgent to stop the extension of the unrest to other areas and regions. Cases of company holdups by armed groups are already reported in Bonabéri [in Douala, the country’s economic capital],” Gicam concluded. | | | | | | | | | | | | | | | |  |
|  |  |
|  |  | | | | | | | | | | | | | | | |  |
| Reports\\Coding Summary By Node Report | | | | | | | | | | Page 37 of 140 | | | | | | | |
| 1/21/2023 3:37 PM | | | | | | | | | | | | | | | | | |
|  | | | **Aggregate** |  | **Classification** |  | **Coverage** |  | **Number Of Coding References** | |  | **Reference Number** |  | **Coded By Initials** |  | **Modified On** |  |
|  | | | | | | | | | | | | | | | | | |
|  | | | | | | | | | | | | 5 |  | CP |  | 12/11/2022 12:54 AM |  |
|  | A Bamenda-based businessman, Ngwa Pius, said “the business environment has become extremely hostile.” He said sales have dropped and he no longer feels safe being in Bamenda. | | | | | | | | | | | | | | | |  |
|  |  | | | | | | | | | | | | | | | |  |
|  | | | | | | | | | | | | 6 |  | CP |  | 12/11/2022 1:01 AM |  |
|  | In the Southwest just like Northwest administrative officers were obliged to issue travel ban to neighbouring French speaking regions. The Divisional Officer of Buea ,KouamWokam Paul, last week banned denizens from travelling out of  Buea | | | | | | | | | | | | | | | |  |
|  |  | | | | | | | | | | | | | | | |  |
|  | | | | | | | | | | | | 7 |  | CP |  | 12/11/2022 1:03 AM |  |
|  | The Cameroon Development Corporation, CDC will not abandon its apolitical and people centred values despite the current difficulties that it faces.  This assurance was given by the General Manager of the corporation Franlin Ngoni Njie in a recent press release. | | | | | | | | | | | | | | | |  |
|  |  | | | | | | | | | | | | | | | |  |
|  | | | | | | | | | | | | 8 |  | CP |  | 12/11/2022 1:08 AM |  |
|  | Gaous was my schoolmate and childhood pal. He was not even involved in the strike, but was shot. I carried him on my shoulders for more than a kilometer before he died on the way to the hospital. It was a sad day for me. Life has never been the same again. This time, we must drive these barbarians from our country.” Said Elvis.  There was outright grief | | | | | | | | | | | | | | | |  |
|  |  | | | | | | | | | | | | | | | |  |
|  | | | | | | | | | | | | 9 |  | CP |  | 12/11/2022 1:11 AM |  |
|  | The Governor of the North West region, Lele L’Afrique Adolphe, has slammed another dusk to dawn curfew and travel ban on the population of the Region.  This came on the eve on the eve of the 2018 National Youth Day celebration just hours before the Head of State’s address to the youths.  Following this curfew and travel ban, denizens of the Region are expected to be indoors as from 8 pm till 6 am and no vehicle is expected to enter or leave to another Division after 8 pm.  This came just days after the administration placed a ban on possession and use of guns within the North West region and more gun owners have been ordered to surrender their guns to the nearest administrative unit.  This is the same scenario in the South West region where a curfew has also been declared.  In the city of Bamenda at about 7 pm | | | | | | | | | | | | | | | |  |
|  |  |
|  |  | | | | | | | | | | | | | | | |  |
|  | | | | | | | | | | | | 10 |  | CP |  | 12/11/2022 1:12 AM |  |
|  | Radio & TV Houses Closely Monitored  Before, during and after 1 October, radio and TV stations mostly in the Anglophone regions, were closely monitored by the military and secret service policemen. Soldiers and policemen took strategic positions close to or at the radio and TV stations.  This was to preempt any attempt by the SCNC or other secessionists from taking over the stations to broadcast their messages. It would be recalled that in December 1999 some members of the SCNC hijacked CRTV Buea and broadcast a message declaring the independence of Southern Cameroons.  In the North West region, we learnt, the administration vowed to shut down any Radio Station that broadcast any item related to SCNC or secession.  Anglophone Lawyers’ Confab Banned  Meanwhile, Anglophone lawyers, led by Barrister Abeng Roland Dze, had planned a press conference in Douala on 1 October 2016 to focus on the need for the translation of OHADA Law into English. After being granted an authorisation by the Divisional Officer of Douala I Sub-Division, Jean Marc Ekoa Mbarga, dated 27 September 2016, the lawyers | | | | | | | | | | | | | | | |  |
|  |  |
|  |  | | | | | | | | | | | | | | | |  |
|  | | | **Internals\\La voix du centre** | | | | | | | | | | | | | |  |
| No |  |  |  | 0.0190 |  | 5 | |  | | | | | |
|  | | |  |  |  |  |  |  |  | |  | | | | | | |
|  | | | | | | | | | | | | 1 |  | CP |  | 12/11/2022 2:28 AM |  |
|  | Il faut dire que cela n’a pas été de gaité de cœur pour le chef du gouvernement Camerounais de signer ce décret quelques temps après qu’il soit rentré de la zone dite anglophone de cette localité.  En rappel, une visite de 04 jours aux fins de ramener la paix dans cette zone avait été effectuée par Dion Ngute. Il avait alors été accueilli par les chefs traditionnels sur le pont du mungo en tant que dignitaire de la localité. Accompagné du patriarche et doyen d’âge du Senat Chief Mukete, une offre de dialogue pour la résolution de cette crise qui secoue les 02 regions anglophones avait été entamée et bien sûr, les lueurs d’espoir pour cette sortie de crise qui sévit depuis 03 ans | | | | | | | | | | | | | | | |  |
|  |  | | | | | | | | | | | | | | | |  |
| Reports\\Coding Summary By Node Report | | | | | | | | | | Page 38 of 140 | | | | | | | |
| 1/21/2023 3:37 PM | | | | | | | | | | | | | | | | | |
|  | | | **Aggregate** |  | **Classification** |  | **Coverage** |  | **Number Of Coding References** | |  | **Reference Number** |  | **Coded By Initials** |  | **Modified On** |  |
|  | | | | | | | | | | | | | | | | | |
|  | | | | | | | | | | | | 2 |  | CP |  | 12/11/2022 2:49 AM |  |
|  | Joseph Le a publié les listes sur le site internet du ministère de la Fonction Publique et de la Réforme Administrative. Les concernés sont invités à produire des explications pour justifier leurs absences.  Le ministre de la fonction publique et de la reforme administrative est déterminé à voir clair sur cette situation qui pénalise le fonctionnement de l’administration ainsi que l’économie du Cameroun malgré la pandémie du Covid-19, s’engageant ainsi à faire prévaloir l’éthique et la déontologie qui lui sont chers. Ce sont près de 8766 agents publics qui sont suspendus de solde depuis fin 2019 à la suite d’une série de décisions du ministre de la Fonction Publique et de la Réforme Administrative (MINFOPRA), Joseph LE, constatant leurs absences irrégulières à leurs différents postes de travail. Parmi eux, 3721 sont des agents de l’Etat relevant du Code du Travail et 5045 des fonctionnaires. Dans une note d’information publiée le 24 avril, le MINFOPRA, renseigne que les listes nominatives sont consultables sur le site internet de son ministère, www.minfopra.gov.cm.Les concernés sont invités à produire des explications pour justifier leurs absences. En raison du COVID-19 et des mesures de distanciation sociale, ils peuvent le faire soit par e-mail, ou par WhatsApp. Faute de quoi, prévient le MINFOPRA, ils s’exposent aux sanctions disciplinaires prévues par la réglementation en vigueur.  Au terme des demandes d’explications en cours et des réponses y afférentes, plusieurs options s’offrent: reprise | | | | | | | | | | | | | | | |  |
|  |  |
|  |  | | | | | | | | | | | | | | | |  |
|  | | | | | | | | | | | | 3 |  | CP |  | 12/11/2022 3:18 AM |  |
|  | Au cours des manifestations  pacifiques de ce 22 septembre 2017 qui ont eu lieu dans les localités du Nord-ouest et Sud- Ouest les populations forcées de quitter leurs racines par crainte de représailles policières.  Ils ont bravé la décision des autorités qui interdisent toute manifestation pacifique ces hommes, femmes et enfants de Bamenda et Buéa. Venues des villes et des localités éloignées, les populations anglophones ont organisé une marche pacifique dans les capitales des deux régions. Leurs ambitions portent | | | | | | | | | | | | | | | |  |
|  |  | | | | | | | | | | | | | | | |  |
|  | | | | | | | | | | | | 4 |  | CP |  | 12/11/2022 3:34 AM |  |
|  | Celles-ci sont les principales victimes de ce conflit qui ne cesse de s’enliser. Nombre d’entre elles, désormais sans repère, affrontent l’adversité pour se faire une nouvelle vie.  Meurtres, déplacements forcés, destructions de biens, les populations civiles ne savent plus à quel saint se vouer pour se soustraire à cette situation qui ne cesse de s’aggraver au fil de jours dans la zone anglophone du Cameroun. Plusieurs cas d’abus, conséquence plausible des escarmouches à répétition entre les sécessionnistes et les forces de sécurité et de l’ordre continuent d’alimenter la grande actualité dans ce pays. L’on s’apitoie particulièrement sur le sort des personnes qui s’étant saignées sur les quatre veines pour se construire des fortunes et des familles, se trouvent seules au monde, après avoir tout perdu. A l’épouvante générale par exemple, une chaîne de télévision locale a diffusé, il y a quelques jours, une émission-documentaire fort émouvante où l’histoire d’une dame était relatée. Nommée Anne Marie Odibioyekene, cette Camerounaise s’était retrouvée du jour au lendemain, sans époux, sans enfants et sans maison.   D’après les commentaires faits par les journalistes, cette femme originaire de la zone francophone du pays, s’était installée depuis plusieurs | | | | | | | | | | | | | | | |  |
|  |  |
|  |  | | | | | | | | | | | | | | | |  |
|  | | | | | | | | | | | | 5 |  | CP |  | 12/11/2022 3:38 AM |  |
|  | Ce sont au total 130 réfugiés qui vivent dans une habitation à Douala. Toutes des femmes, elles ont trouvé un abri depuis plus d’un an au domicile d’un homme à Makèpè. Elles se sont enfuies et abandonnées  leurs conjoints suite aux violences qui perdurent dans les zones anglophones  du pays.  Ces femmes se livrent aux  petits métiers pour joindre les deux bouts, une tache qui ne rend pas  leur journée facile. Dans le même temps, quelques – une d’entre elles  ont trouvé la mort dans leur peine, tandis que  certaines sont encore en souffrance dans les hôpitaux.   Dans sa déclaration face au reporter, Joseph Mofor le responsable du domicile qui accueille les femmes dit avoir transmis aux | | | | | | | | | | | | | | | |  |
|  |  | | | | | | | | | | | | | | | |  |
|  | | | **Internals\\the post newspaper** | | | | | | | | | | | | | |  |
| No |  |  |  | 0.0374 |  | 10 | |  | | | | | |
|  | | |  |  |  |  |  |  |  | |  | | | | | | |
|  | | | | | | | | | | | | 1 |  | CP |  | 12/11/2022 10:50 PM |  |
|  | Northwest will hardly forget. On this day, soldiers who were chasing a bike and gunman who, as early as 8am, went round town shooting in the air and chanting “Ambazonia Oye! Ambazonia Oye, our new country Oye!” and his mystical disappearance when he reached Ambo village, left the soldiers confused and they started venting their anger on the unarmed population. For fear of being arrested, young men and women disappeared into bushes. The whole of Batibo Commercial street was deserted.  In order to steal freely, the soldiers went on the rampage, firing guns in the air and the villagers disappeared into the bushes nearby and watched helplessly as their shops, private homes were being broken into, ransacked inside-out and goods carted away in their military vehicles. | | | | | | | | | | | | | | | |  |
|  |  |
|  |  | | | | | | | | | | | | | | | |  |
|  | | | | | | | | | | | | 2 |  | CP |  | 12/11/2022 10:52 PM |  |
|  | Hundreds of families rendered homeless owing to a military crackdown on suspected Ambazonia forces accused of triggering unrest in villages across Mbonge Subdivision, continue streaming into Kumba and the Northwest Region.  Villagers who scampered into bushes last weekend have been making their way into Kumba to live with friends and relatives.  Others of Northwest extraction have made fast journeys | | | | | | | | | | | | | | | |  |
|  |  | | | | | | | | | | | | | | | |  |
| Reports\\Coding Summary By Node Report | | | | | | | | | | Page 39 of 140 | | | | | | | |
| 1/21/2023 3:37 PM | | | | | | | | | | | | | | | | | |
|  | | | **Aggregate** |  | **Classification** |  | **Coverage** |  | **Number Of Coding References** | |  | **Reference Number** |  | **Coded By Initials** |  | **Modified On** |  |
|  | | | | | | | | | | | | | | | | | |
|  | | | | | | | | | | | | 3 |  | CP |  | 12/11/2022 10:57 PM |  |
|  | As incumbent and candidate for the CPDM party, Biya Paul, was, October 22, being proclaimed winner by the Constitutional Council, security in the city of Yaounde was on red alert.  The last October 7, 2018 Presidential election in Cameroon saw the participation of eight other candidates, notably: Prof. Maurice Kamto, Libii Li Ngue Ngue Cabral, Joshua Osih Nambangi, Serge Espoir Matomba, Franklin | | | | | | | | | | | | | | | |  |
|  |  | | | | | | | | | | | | | | | |  |
|  | | | | | | | | | | | | 4 |  | CP |  | 12/11/2022 10:59 PM |  |
|  | The Buea Council has placed a seal on the offices of MTN Cameroon, NEXTTEL and Orange Cameroon branch offices in Buea, Southwest Region, for heeding to ghost town calls, which have persisted in the Municipality for close to a year now.  The seal on the Buea branches of the Telecom networks was put on November 13 by the Council’s officials who moved from shop to shop sealing every one that was not open.  Many of the company’s customers who visited the offices to have their mobile telecommunication issues solved were left stranded outside.  A shop owner, whose name we withhold for fear of reprisal, recounted how she got the news sealing her shop.  “I have not been in town for over a week now. I was out for a burial in the village and I was only called by my neighbour on Monday who informed me about it. I could not come to the shop sinceI was not in town. But I have decided not to respect the seal because I don’t have any agreement with the council.  I have a pile of documents showing my regular patent payment. I have said it time and again that, if they want me to open my shop [during ghost town], I will provide a document for them to sign. This will spell out that in case of any arson, they will take responsibility. I can equally decide to lock up my shop for a month that is not their business,” she ranted. | | | | | | | | | | | | | | | |  |
|  |  |
|  |  | | | | | | | | | | | | | | | |  |
|  | | | | | | | | | | | | 5 |  | CP |  | 12/11/2022 11:00 PM |  |
|  | The once busy Kumba-Tombel Road axis is yet to regain its traffic verve months after it went dead owing to deadly separatists and military clashes that paralysed human movement.  Bikers and other business persons who used the road daily are yet to return to the said axis despite relative calm in the area. The road is a major electricity route into Kumba and a business corridor for food and cash crops.  Deadly clashes on the axis affected the supply of electricity into Kumba. Before the gun battles of the Anglophone Crisis, Kumba enjoyed the supply of current from two ends. Since the Tombel end went dead, Kumba has been powered with electricity from the Buea-Muea axis. | | | | | | | | | | | | | | | |  |
|  |  | | | | | | | | | | | | | | | |  |
|  | | | | | | | | | | | | 6 |  | CP |  | 12/11/2022 11:11 PM |  |
|  | The Bamenda City Mayor, Paul Achobong, has castigated administrators and civil servants in the Northwest Regions who do not go to work on Mondays “but are the first to rush to the banks every month end to collect their salaries.”  He said “such attitudes clearly demonstrate that they are Amba supporters and should go and receive their salaries from Amba.”  Mayor Achobong regretted that all Government offices are always closed on Mondays and the population cannot get their documents treated on time.  “This is not fair and beginning January 2021 as we enter this New Year; we must take as a resolution that enough is enough to ghost towns on Mondays because the socio-economic damages for four years have been colossal. People are fade-up with this senseless war. Almost every home has been touched… We cannot keep on living this way. ” | | | | | | | | | | | | | | | |  |
|  |  |
|  |  | | | | | | | | | | | | | | | |  |
|  | | | | | | | | | | | | 7 |  | CP |  | 12/11/2022 11:32 PM |  |
|  | “Mr. Minister, we are so elated that, since this socio-political crisis started, this is the first time that you have spent a night in Bamenda. During your stay, your collaborators must have told you about teething problems plaguing this restive Region, ranging from deplorable roads from Matazem in Santa – the gateway into Bamenda – which you and saw yourself. So, you can imagine how bad the roads linking the regional capital of Bamenda are. Again, you must be informed that most of your services are facing infrastructural, financial and logistic problems. Though Government is, and has been, doing its best, we are pleading that you provide solutions to these problems and convey huge thanks to our illustrious Head of State for all measures he has taken to put an end to this conflict that has been claiming lives and destruction of property. The population is suffering.” | | | | | | | | | | | | | | | |  |
|  |  |
|  |  | | | | | | | | | | | | | | | |  |
|  | | | | | | | | | | | | 8 |  | CP |  | 12/11/2022 11:54 PM |  |
|  | The Separatist forces have reportedly been visiting some localities in the municipality on supposed mission which they allege is to cleanse their reputation which they say has been tarnished by some rogues who have been posing as the Separatist forces.  On Tuesday, July 3, in Mile 16, the Amba Boys caught close to 25 impostors who have been terrorising the neighbourhood and giving them a bad name in front of the public. The 25 impostors were given the beatings of their life in front of the population.  The impostors had been reportedly going around tying red pieces of cloth on their hands and heads and also extorting money from the population in the name of being Amba Boys. The leader of the impostors succeeded to escape the wrath of the Amba Boys as his other members faced the music.  In Muea, some individuals allegedly went around as Amba Boys asking the population to give money to support the struggle. Unfortunately for them, the news got to the Amba Boys who had to react in order to cleanse | | | | | | | | | | | | | | | |  |
|  |  |
|  |  | | | | | | | | | | | | | | | |  |
|  | | | | | | | | | | | | 9 |  | CP |  | 12/11/2022 11:59 PM |  |
|  | Bike riders in Cameroon’s Northwest Region are not having it easy, as they are faced with two uncompromising forces; the Region’s administrators, ordering them to register bikes and paint them with a unique yellow colour, and uncompromising Separatist fighters on the other hand, warning that respecting the administrators will be tantamount to forfeiting one’s bike, because it will be seized and burnt. | | | | | | | | | | | | | | | |  |
|  |  | | | | | | | | | | | | | | | |  |
| Reports\\Coding Summary By Node Report | | | | | | | | | | Page 40 of 140 | | | | | | | |
| 1/21/2023 3:37 PM | | | | | | | | | | | | | | | | | |
|  | | | **Aggregate** |  | **Classification** |  | **Coverage** |  | **Number Of Coding References** | |  | **Reference Number** |  | **Coded By Initials** |  | **Modified On** |  |
|  | | | | | | | | | | | | | | | | | |
|  | | | | | | | | | | | | 10 |  | CP |  | 12/12/2022 12:03 AM |  |
|  | John Princely is an Internally Displaced Person, IDP, from the crisis-hit Northwest Region of Cameroon. Just like him, many are seeking refuge in major towns of Cameroon. They have escaped from a war that has ravaged their lives and communities in the Northwest and Southwest Regions of Cameroon since 2016.  In Yaounde, John Princely is seen sitting under the scotching sun at the Simbock neighbourhood, His eyes are reddish, and he looks exhausted. From all indications, he has been hungry for the past few days. He is not ready to talk, but the expression on his face says all is not fine.  “The situation is one that I can’t tell. We thought that by escaping from the war-tone region of the Northwest, we are free, and could survive, but look at it. The coronavirus has caused so many problems, but we are managing. That is all I can tell you,” Princely said.  “We thought, we were free after running away from what is happening back home but little did we know that another one bigger than the war was under way. The fear of the coronavirus cannot be underestimated, but what I can tell you is that we are suffering. We can no longer do the little things we did to survive again, because of the virus. To have what to eat now is not a day’s job,” Samiratu Atoh another displaced person said. | | | | | | | | | | | | | | | |  |
|  |  |
|  |  | | | | | | | | | | | | | | | |  |
|  | | | **Internals\\the sun newspaper** | | | | | | | | | | | | | |  |
| No |  |  |  | 0.0397 |  | 20 | |  | | | | | |
|  | | |  |  |  |  |  |  |  | |  | | | | | | |
|  | | | | | | | | | | | | 1 |  | CP |  | 12/1/2022 4:36 AM |  |
|  | “The future of our children is being overshadowed by irrelevant forces. Education remains the right to every child and this should not be jeopardized for whatsoever reason. The children need to be educated. It is their future which matters most’’. D.O Wokam Paul noted.  As a result, the divisional officer opened the floor for solutions to be brought forward as regard to the ongoing crisis. Major concerns were brought up from the media as well as the education sector, some of which were the then absence of internet connection as a means of communication. Security, the already existing mindset of the parents and children which will be extremely difficult to change especially for those in urban areas, the detention of some media men which has shown that there is no freedom of press, amongst others. | | | | | | | | | | | | | | | |  |
|  |  | | | | | | | | | | | | | | | |  |
|  | | | | | | | | | | | | 2 |  | CP |  | 12/1/2022 4:42 AM |  |
|  | In view of the current political deadlock rocking the two Anglophones regions of Cameroon, the sons and daughters of Manyu division of the South West region have taken a firm stance to call off the phenomenon of calls of ghost towns and boycott of schools. This was during a three days consultative meeting that held in Mamfe under the banner of “all | | | | | | | | | | | | | | | |  |
|  |  | | | | | | | | | | | | | | | |  |
|  | | | | | | | | | | | | 3 |  | CP |  | 12/3/2022 9:44 PM |  |
|  | “The people used to live here, but they’re now in forests. For the past six months I have not talked to my brothers. I have not spoken to any of my family members. I don’t know their whereabouts. I don’t know if there are still alive or dead.” | | | | | | | | | | | | | | | |  |
|  |  | | | | | | | | | | | | | | | |  |
|  | | | | | | | | | | | | 4 |  | CP |  | 12/3/2022 10:00 PM |  |
|  | In the weeks to the build up to Cameroon’s presidential elections last October, many locals of the North West and South West regions in the peripheries had to flee as it was perceived violence between Non-State Armed Groups and State Forces would soar.  This group of Internally Displaced Persons (IDPs) in Sodiko a neighbourhood in Bonaberi Douala saw that it was time to leave their homes in Mile 16 Buea and other places they considered unsafe.  They escaped from their homes together with their children, carrying along with them small bags of clothes, abandoning the life they knew behind to the safety of the country’s economic capital.  “The situation had reached alarming proportions and we could not stay back despite our love for home,” Mami Glory Ayuk says from this uncompleted building in Sodiko. | | | | | | | | | | | | | | | |  |
|  |  |
|  |  | | | | | | | | | | | | | | | |  |
|  | | | | | | | | | | | | 5 |  | CP |  | 12/3/2022 10:07 PM |  |
|  | Considered as the economic capital of the South West Region linking Ndian, Kupe-Muanenguba and Manyu Divisions, the town is just an eyesore, as the state of roads remains in deplorable conditions. This has caused the inhabitants of the city to raise eyebrows and point accusing fingers at municipal authorities, for being the hidden hands behind the deplorable conditions of the roads and streets due to their lack of developmental foresight. | | | | | | | | | | | | | | | |  |
|  |  | | | | | | | | | | | | | | | |  |
|  | | | | | | | | | | | | 6 |  | CP |  | 12/3/2022 10:56 PM |  |
|  | The South West and North West Women Task Force have joined the general call for effective resumption of school in the two Anglophone troubled regions of Cameroon.  According to a release issued by the president, Omam Esther Njomo, a copy of which The SUN procured, all stakeholders must assume their responsibilities and uplift the ban on education in the North West and South West regions.  The release states that: “We, the Mothers, Sisters and Aunties; call on all key stakeholders to assume their responsibilities accordingly and uplift the ban on education and caution their fighters to stop attacking academic institutions, teachers, as well as students and to evacuate school premises, free all students trapped in prison cells and camps and speed up the reconstruction and rehabilitation of schools affected by the crisis; and ensure the security of pupils and students by ending hostilities and providing enabling conditions for safe schools.” | | | | | | | | | | | | | | | |  |
|  |  |
|  |  | | | | | | | | | | | | | | | |  |
| Reports\\Coding Summary By Node Report | | | | | | | | | | Page 41 of 140 | | | | | | | |
| 1/21/2023 3:37 PM | | | | | | | | | | | | | | | | | |
|  | | | **Aggregate** |  | **Classification** |  | **Coverage** |  | **Number Of Coding References** | |  | **Reference Number** |  | **Coded By Initials** |  | **Modified On** |  |
|  | | | | | | | | | | | | | | | | | |
|  | | | | | | | | | | | | 7 |  | CP |  | 12/3/2022 10:58 PM |  |
|  | The day comes at a critical point in Cameroon’s history with the country facing upheavals in the Anglophone Regions. The over three-year crisis has seen teachers beaten, maimed, kidnapped, and others killed simply for practicing their profession.  The Regional Delegate of Secondary Education, Dr. Hannah Mbua Etonde, during the ceremony urged the teachers to shun fears and be courageous, considerate, and daring, knowing that if they stay away from classes, they are killing generations. “Let us take measures that will see teachers work in a calm atmosphere. At this point in time, teachers need to be credible and courageous while adapting to the changes to the profession, taking into consideration technological advancement.” | | | | | | | | | | | | | | | |  |
|  |  | | | | | | | | | | | | | | | |  |
|  | | | | | | | | | | | | 8 |  | CP |  | 12/3/2022 11:01 PM |  |
|  | Before the war, our poor parents could go without food just to educate their children.  -Parents: we do not doubt the desire of parents to send their children to school. Educating children is the pride of every Anglophone parent. We call on you all to stand up like one man and fight for the future of your children. Don’t forget that education is the best inheritance for your children.  -Students/Pupils: You are the main victims of the school boycott. It is your future that is being destroyed as other kids have moved to safer areas to study. Your right to education is a basic human right. You must not let anyone take it from you. Learn from the examples of other countries who made this mistake. Don’t repeat the errors of other countries.  -International Organizations: This is the time you are needed most. You played an important role during peace time to ensure the education of youths. You assisted in building and equipping schools during peace time. You can provide temporary Premises (tents) where schools have been destroyed. You run school in conflict zones and war ravage countries. Our case should not be an exception.  -Religious Authorities: Before the crisis, you played a vital role in education as you operated the best educational establishments. The shutdown of school is a great set back to the society you have toiled for decades to build. The teachers and other staff have been out of work which affects entire families. The once morally upright youths you produced are now an exact opposite. All these values can only come back if you take your responsibility and fight for an effective school resumption in safety. | | | | | | | | | | | | | | | |  |
|  |  |
|  |  |
|  |  | | | | | | | | | | | | | | | |  |
|  | | | | | | | | | | | | 9 |  | CP |  | 12/3/2022 11:39 PM |  |
|  | As the Cameroon government continues on its scheme to clamp down on the Anglophone activists, many of them have been fleeing the country while those in the diaspora now fear for their lives.  One of them is Gilbert Nkenganyi Azenganyi, a member of the SCNC and leader of the youth wing, who has escaped out of the country since May 29, 2013.  On March 3, 2017 he took part in a mass protest of Anglophone Cameroonians. The mass demonstration which took place in New York, had the protesters calling on the United States government to put pressure on the Yaounde regime and bring an end to what they termed genocide going on in the two English-speaking regions of Cameroon. | | | | | | | | | | | | | | | |  |
|  |  |
|  |  | | | | | | | | | | | | | | | |  |
|  | | | | | | | | | | | | 10 |  | CP |  | 12/3/2022 11:40 PM |  |
|  | The few Journalists who are braving the storm can be read or heard on air blabbering half truths. Others have abandoned the profession and have resorted to business, farming or just idling around and doing nothing.  Some North West elites, like the Fons, Senators, Parliamentarians and the National Chairman of SDF, Ni John Fru Ndi have raised concerns on the apparent stifling of the press to no avail. | | | | | | | | | | | | | | | |  |
|  |  | | | | | | | | | | | | | | | |  |
|  | | | | | | | | | | | | 11 |  | CP |  | 12/3/2022 11:51 PM |  |
|  | Courts in the North West and South West regions still remain grounded despite calls by the President of the Cameroon Bar Council, Barrister Ngnie Kamga Jackson for the Common Law lawyers to resume work. Barrister Ngnie Kamga had in a meeting with some 20 Senior Common Law Lawyers drawn from the North West and South West Regions in Buea on April 8, 2017 resolved that Lawyers will suspend their strike action and resume effective work on May 2, 2017. But till date, courts are still paralysed.  When The SUN visited the Meme High Court holden in Kumba, the cause list comprising of criminal and civil matters for the day were pasted on the notice board of the various courts but the sessions were going on with just the government bench represented. The Bar was empty. | | | | | | | | | | | | | | | |  |
|  |  | | | | | | | | | | | | | | | |  |
|  | | | | | | | | | | | | | | | | | |
|  | | | | | | | | | | | | | | | | | |
| Reports\\Coding Summary By Node Report | | | | | | | | | | Page 42 of 140 | | | | | | | |
| 1/21/2023 3:37 PM | | | | | | | | | | | | | | | | | |
|  | | | **Aggregate** |  | **Classification** |  | **Coverage** |  | **Number Of Coding References** | |  | **Reference Number** |  | **Coded By Initials** |  | **Modified On** |  |
|  | | | | | | | | | | | | | | | | | |
|  | | | | | | | | | | | | 12 |  | CP |  | 12/4/2022 3:43 PM |  |
|  | The escalating crisis in the North West and South West regions of the country has shifted gears over the weekend with unending episodes of gun battles between gunmen believed to be separatist fighters and the military on multiple fronts.  These clashes were accentuated by brutal killings, lootings, burning of civilian homes as well as abductions. Civilians have been caught in the crossfire leading to untold suffering. Many are now internally displaced and have left their communities for the (dis)comfort of the bushes.  Munyenge and Bafia, both localities under Muyuka sub-division in Fako witnessed serious clashes over the weekend between separatists and the military. The population deserted the villages while the unfortunate ones were either caught by bullets or arrested by the military.  A particular case caught the attention of the public after a video surfaced on social media showing a helpless middle-aged man struggling on the ground with a leg that had apparently been shattered by bullets. The young man would be indentified as Michael Modika, a deaf and dump in Munyenge who was obviously oblivious of what was happening when he strayed into the path of military bullet.  Modika was trapped in the village as the military reportedly blocked all movements of cars and persons in and out of Munyenge-Muyuka.  Modika sadly had his leg amputated almost 48 hours later owing to the delayed medical attention to it as the leg was rotting off. He is now under very intensive medical care at a certain health unit in Kumba under the care and supervision of the Ayah Foundation-A foundation that has been coming to the aid of victims of the Anglophone crisis.  In Bafia, a locality close to Munyenge, some of the villagers who had fled into the forest after the military invasion returned to a scourged village. Several houses were set ablaze, reportedly by the military.  Another video surfaced over the weekend of what could be seen as military officers setting a house on fire in a locality that has now been identified as Azi in Lebialem.  Government is yet to make a statement regarding the video which many have quickly attributed to the Cameroon military which has been accused in the past of setting other villages on fire like in Kwa Kwa, Bole and other areas.  Separatists have also been accused in the past of setting public structures like schools, control posts and police stations ablaze.  Serious clashes were also reported in other areas like Wabane in Lebialem, Nyasoso in Kupe Muanenguba, Bekora near Lobe in Ndian in the South West region with casualties reportedly recorded on both sides.  In Bali, in the North West region, a military commander and a soldier were reportedly killed by armed men claiming to be separatists.  Reports which The SUN could not immediately verify suggests that the supposed separatists stole a goat and plantains belonging to a local. The person then reported the matter to security forces. When the military commander and another officer tried to intervene in the matter, they were reportedly ambushed and killed.  The man who reported the goat and plantain theft is said to have been arrested for further questioning meanwhile the killers are at large.  The incident forced the population of Bali to flee to other parts and into the bushes for fear of being victims of military reprisal.  In Kom, a Catholic priest, Principal of St. Bede’s college was reportedly abducted on Monday, April 30 when he was at mass with his students in Ashinkom.  St. Bede’s was the only college still effective in the area. The principal’s abduction has forced the lone operational school in the area to close as parents poured in after the news to collect their kids. | | | | | | | | | | | | | | | |  |
|  |  |
|  |  |
|  |  |
|  |  |
|  |  | | | | | | | | | | | | | | | |  |
|  | | | | | | | | | | | | 13 |  | CP |  | 12/4/2022 3:44 PM |  |
|  | Some pregnant women in Cameroon’s North West Region have decried the unending curfew ordered by Governor Adolf Lele L’Afrique when the Anglophone crisis metamorphosed into an armed rebellion.  “I fear for what may befall me should I start to labour after 9pm. How do I transport myself to the hospital?” a pregnant woman wondered aloud as she explains the ordeal pregnant women go through after 9:00pm.  Others narrated the experience they had as they were caught in labor pains after 9pm. “It was at about 9:30pm that I started feeling some sharp pains around my waist. I realized it could be labour pains. In that confusion I wondered what to do next. As I was packing my emergency bag, it dawned on me that I had a friend who works at the regional hospital. This friend helped me call the ambulance. That is how I managed to reach the hospital safely. I was lucky because I had the connection. I wonder what happens to other women trapped in such a condition,“ Emelda, a nursing mother told The SUN.  Another lady who had just been delivered of a baby girl recounted her own experience to this reporter: “I started experiencing labour pains at about 11:00pm so I woke my mother to take me to the hospital. Since it was within curfew hours, my mother took me to a nearby clinic. When we got there, the nurses couldn’t handle my case properly so we were left with no choice than to go to the general hospital. My mother, landlady and my brother accompanied me to the general hospital from Nacho quarter. Since neither cars nor bike ply the streets after 9:00pm, we had to trek to the hospital. Even with the pains I had no choice than cover the distance on foot. As we approached the hospital, we were stopped by some military officers just some few meters before the maternity gate. We were asked to stop and carry our hands up, which we obeyed. We were then asked where we were going to. We told them we were heading for the maternity. They later asked us why we had to go only at that hour. I told them the labor pains were unbearable. They later asked us to run and get out of their sight. We then hurried and got to the hospital and I was delivered of my baby an hour later. It was a stressful and terrifying experience, I must say.”  The SUN equally gathered that a lady almost put to birth at home because she was waiting for the time to clock 6am before she could go to the hospital. Some nurses said that they had received cases where women get complications because they laboured for several hours before rushing to the hospital for proper check up. | | | | | | | | | | | | | | | |  |
|  |  |
|  |  |
|  |  |
|  |  | | | | | | | | | | | | | | | |  |
|  | | | | | | | | | | | | | | | | | |
| Reports\\Coding Summary By Node Report | | | | | | | | | | Page 43 of 140 | | | | | | | |
| 1/21/2023 3:37 PM | | | | | | | | | | | | | | | | | |
|  | | | **Aggregate** |  | **Classification** |  | **Coverage** |  | **Number Of Coding References** | |  | **Reference Number** |  | **Coded By Initials** |  | **Modified On** |  |
|  | | | | | | | | | | | | | | | | | |
|  | | | | | | | | | | | | 14 |  | CP |  | 12/4/2022 7:23 PM |  |
|  | After vowing not to leave the debris of their burnt houses to anywhere else on the 19th of November 2019, some of the more that 700 affected persons of the eighty-three and twenty-eight burnt houses in Abuh and Ngwah villages respectively in Fundong Sub Division in Boyo Division of the North West Region of the Republic of Cameroon are now caught in a real state of dilemma as the rains begin fully. After watching in deep pain and with sincerely heavy hearts their houses burn to ashes, some unable to even see what went down and some only resurfacing after three days to face the ugly shock and reality they had been forcefully brought to, more than seven hundred (700) victims; women, men and children not forgetting to mention in bold heavily pregnant women who had prepared their maternal kits awaiting delivery were as stranded as the Israelites before the deadly Red sea and at the mercy of savage chariots of Pharaoh just before Moses hit the Red Sea with his magic staff.  Forcefully pushed into the rank of Internally Displaced Persons, most of the victims moved out of the villages to Fundong Central Town to perch with family members there while many moved further into the bushes and down to Konene and Fonfuka in Bum Sub Division. Living completely at the mercy of strangers and the community that is already suffering adverse effects as a result of the gotten out of hand Anglophone Crisis, the victims have been subjected to the most grave of psychological trauma especially as all their food stuff; maize, beans, oil rice and other basic commodities including all their clothes were razed to complete ashes without the chance of saving even a pin. Even their pots were melted by the wild fire. | | | | | | | | | | | | | | | |  |
|  |  |
|  |  |
|  |  | | | | | | | | | | | | | | | |  |
|  | | | | | | | | | | | | 15 |  | CP |  | 12/12/2022 1:14 AM |  |
|  | By Sah Terence Animbom  Following the escalation of the Anglophone crisis into an armed conflict growing at the speed of light, the growing need for immediate humanitarian action and aid has continued to grow at an exponential rate on daily basis since October 2017. With more than 500,000 internally displaced persons so far, excluding the over 40.000 refugees in Nigeria, it is clear that one humanitarian organization cannot handle the many health needs of the masses affected. It is on this background that an international humanitarian organization known as Doctors Without Borders and mostly by its French acronym Medicins Sans Frontieres made its entry into the country and into the North West Region in September 2018 in a bid to carter for the health needs of the affected populations of the North West Region especially women and children who happen to be the most vulnerable set of persons in the society and especially during crisis situations. | | | | | | | | | | | | | | | |  |
|  |  |
|  |  | | | | | | | | | | | | | | | |  |
|  | | | | | | | | | | | | 16 |  | CP |  | 12/4/2022 9:47 PM |  |
|  | Many people have fled Fako Division, South West Region after separatists called for a 10-day lockdown to frustrate the Limbe Festival of Arts and Culture. Hundreds of inhabitants were seen Wednesday night taking last buses out of the town of Buea to neighbouring Douala and even to the capital, Yaoundé.  Prior to the lockdown, voice messages were released by separatist fighters asking that activities be grounded during the said lockdown; no movement of taxis, closure of business premises, and schools and for the population to remain in doors.  Day one of the lockdown was very much in play as Buea, chief town of the South West Region was locked down. Majority of shops, banks, schools and businesses were all closed in response to the lockdown. However, some business premises have defied the lockdown as their shops are open to give solace to the inhabitants to purchase foodstuff for their households.  The population can equally be seen along the streets of Buea, though not in their numbers. “I bought my foodstuff the day before so as to be ready for the lockdown. Last lockdown I didn’t buy any foodstuff which made it very difficult for me to stay at home for 10 days,” one inhabitant in Buea noted.  “I cannot believe that the population is still respecting calls made by separatists. It is unbelievable” another noted.  “How is this lockdown affecting the government and the Republic of Cameroon which the people (separatists) are fighting to secede from”? a local questioned.  It should be recalled that a similar 10 days lockdown was instituted in February across the North West and South West Regions. The lockdown led to inhabitants fleeing the regions, with them only returning afterwards. | | | | | | | | | | | | | | | |  |
|  |  |
|  |  |
|  |  | | | | | | | | | | | | | | | |  |
|  | | | | | | | | | | | | 17 |  | CP |  | 12/4/2022 9:50 PM |  |
|  | Houses in Ukpwa village, a resettlement Camp area on the night of Thursday May 30, were burnt by gunmen who portrayed themselves as Ambazonia Restoration Fighters, accusing the Mbororo community of reporting them to the military every day. The SUN spoke to some inhabitants of Upkwa who told the tears provoking tale of how they found themselves homeless and under the rains that night after the raid. “I was taken at gunpoint from my house and the people who were all armed told me we are the ones always reporting them to the government and that we have been kept at the camp by the government, meaning that the government and us are the same, so they don’t want us there anymore. They told me my people and I must leave their land. They pulled me to the mosque, taking along my mattress and promising to burn me with it. When they got to the Mosque, they set the mosque on fire and had me well beaten with their leader smashing me from head to toe. After kicking and smashing and beating me so mercilessly, they now wanted to throw me into the burning mosque but started arguing among themselves. Some said I should be burnt while others said I shouldn’t be burnt. It’s thanks to God that the ones who said I should not be burnt outnumbered those who wanted me to be burnt, and they allowed me there and left. It remains a miracle to me that the mosque did not burn and fall on me, because I was dumped just in front of the mosque, unable to move because of the severe torture they had given me”, the Community leader, Alhadji Bira Kurmajo narrated to The SUN. | | | | | | | | | | | | | | | |  |
|  |  |
|  |  | | | | | | | | | | | | | | | |  |
|  | | | | | | | | | | | | 18 |  | CP |  | 12/4/2022 9:57 PM |  |
|  | One of such areas which once mentioned, swells up fear in the minds of many is Wotutu village located in Buea sub division. The tension in Wotutu is rife, as it hosts a military post, planted to combat armed separatists, said to be located in the area. As a result of this situation, many inhabitants of Wotutu have had to flee for their lives, abandoning their homes and farms, due to the constant gunshots, tensions and harassments they witness daily. | | | | | | | | | | | | | | | |  |
|  |  | | | | | | | | | | | | | | | |  |
| Reports\\Coding Summary By Node Report | | | | | | | | | | Page 44 of 140 | | | | | | | |
| 1/21/2023 3:37 PM | | | | | | | | | | | | | | | | | |
|  | | | **Aggregate** |  | **Classification** |  | **Coverage** |  | **Number Of Coding References** | |  | **Reference Number** |  | **Coded By Initials** |  | **Modified On** |  |
|  | | | | | | | | | | | | | | | | | |
|  | | | | | | | | | | | | 19 |  | CP |  | 12/12/2022 1:09 AM |  |
|  | The rate at which schools in Kumba, chief town of Meme Division, South West Region are busy organising holiday classes, gives an indication that there just maybe an effective back- to-school for the 2019/ 2020 academic year.  Most schools in Kumba that have remained closed for almost two years and their campuses transformed to mini forests, The SUN recently witnessed that the schools are now effectively holding holiday classes.  A parent who pleaded not to be named, hinted that, she has registered all her five children in the various holiday classes in Kumba. She narrated that it’s high time for children to go to school this coming academic year, reasons why she is using this holiday classes for her children to refresh their academic loss memories so that they are better prepared for | | | | | | | | | | | | | | | |  |
|  |  |
|  |  | | | | | | | | | | | | | | | |  |
|  | | | | | | | | | | | | 20 |  | CP |  | 12/4/2022 10:32 PM |  |
|  | Many are of the opinion that the hard times currently being experienced in the North West and South West regions are record breaking!  Words like hell, nightmare, torment, hardship, suffering, frustration etc, continue to be aired from lips across streets in the two regions, as its inhabitants battle daily to survive, in the midst of all that has befallen them!  Prior to 2016, they thought their situations were bad and needed urgent attention from government and the international community. They did not know that they were yet to see worse things!  Anglophone crisis since 2016  Since the later part of the year 2016, a new sorrowful song is being sung across the regions. If it is not tales of gun battles, then it is about bloodshed, death, kidnapping, arson, assault, poverty, suffering etc. Imposed lockdown calls by separatists have so far not made life any better for these inhabitants. Ghost towns are almost a normalcy now. Deprived of their freedom, choices and rights, those living in the two regions appear to be going back in time, in a nightmare whereby they can’t get out of sleep by their effort and no one is able to help get them up from this frightful dream of theirs.  Incessant blackout  Making the already bad situation worse, electricity, for the past two weeks has been whipping hard strokes across major towns in the South West regions especially. Limbe, Buea, Kumba, Mamfe etc are experiencing strange things when it comes to the supply of electricity. While the business person laments on his/her products going bad and no business at all, the ordinary city dweller is unable to engage in any electricity-related activity. Frustration everywhere!  Govt’s measures to curb spread of coronavirus adds salt to injury  While inhabitants continue battling to survive amidst the crisis and blackout, they had little idea on what was coming, until news spread like wild fire, Wednesday, March 18, on measures taken by government to combat the deadly coronavirus pandemic. Above all, it boils down to a shutdown! Schools are closed. Movement is restricted. Gatherings of more than 50 persons prohibited. People are worried, scared, confused. Just how bad can it get? | | | | | | | | | | | | | | | |  |
|  |  |
|  |  |
|  |  |
|  |  | | | | | | | | | | | | | | | |  |
|  | **Nodes\\Financial Support** | | | | | | | | | | | | | | | |  |
|  | | **Document** | | | | | | | | | | | | | | |  |
|  | | | **Internals\\237 online** | | | | | | | | | | | | | |  |
| No |  |  |  | 0.0030 |  | 3 | |  | | | | | |
|  | | |  |  |  |  |  |  |  | |  | | | | | | |
|  | | | | | | | | | | | | 1 |  | CP |  | 12/5/2022 2:25 AM |  |
|  | 75000 ! C’est le nombre de personnes déplacées dans les deux régions anglophones. Le chiffre officiel a été communiqué le 13 juin à Yaoundé, par le ministre de l’Administration territoriale (Minat), Paul Atanga Nji, au cours d’une cérémonie de présentation d’un convoi d’aide humanitaire dépêché par le président de la République, au profit des populations du Sud-Ouest et du Nord-Ouest, victimes des exactions des groupes séparatistes. Au-delà des personnes déplacées, l’on déplore des pertes en vies humaines. Selon l’ONG International Crisis Group, le conflit aurait fait 1 850 morts et forcé plus de 530000 personnes à fuir leur domicile. Des chiffres contestés par le gouvernement et qui sont difficiles à prouver.  L’économie en pâtit aussi. Installée dans la région anglophone du Sud | | | | | | | | | | | | | | | |  |
|  |  |
|  |  | | | | | | | | | | | | | | | |  |
|  | | | | | | | | | | | | | | | | | |
| Reports\\Coding Summary By Node Report | | | | | | | | | | Page 45 of 140 | | | | | | | |
| 1/21/2023 3:37 PM | | | | | | | | | | | | | | | | | |
|  | | | **Aggregate** |  | **Classification** |  | **Coverage** |  | **Number Of Coding References** | |  | **Reference Number** |  | **Coded By Initials** |  | **Modified On** |  |
|  | | | | | | | | | | | | | | | | | |
|  | | | | | | | | | | | | 2 |  | CP |  | 12/5/2022 11:35 PM |  |
|  | Le 13 mai aux Nations-Unies, le représentant américain à la rencontre sur la situation humanitaire née de la crise anglophone a révélé que depuis 2018, les États-Unis ont versé au Cameroun plus de 48 milliards FCFA d’assistance humanitaire.  L’ambassadeur américain Cherith Norman Chalet a expliqué que cette aide a été versée aux communautés d’accueil, aux Personnes déplacées internes et aux réfugiés. « Cette aide est essentielle pour sauver des vies, mais elle ne peut être efficace que si nous avons accès aux populations vulnérables », a-t-il ajouté.  Les États-Unis ont souhaité au cours de cette rencontre « une prise de conscience accrue et une visibilité accrue de la détérioration de la situation humanitaire au Cameroun, ainsi que l’ouverture immédiate d’un espace humanitaire et la fourniture d’un accès sans entrave du personnel humanitaire aux parties au conflit ».  L’International Crisis Group estime à 200 000 le nombre de réfugiés provoqués par la guerre civile en cours dans les régions du Nord-ouest et du sud-ouest du Cameroun. Les affrontements entre l’armée et les milices séparatistes ont déjà fait plus de 1800 morts en 20 mois estime Crisis Group. | | | | | | | | | | | | | | | |  |
|  |  |
|  |  | | | | | | | | | | | | | | | |  |
|  | | | | | | | | | | | | 3 |  | CP |  | 12/6/2022 12:51 AM |  |
|  | civils et politiques au Cameroun.  Pour illustrer ce désir de participer au processus de règlement du conflit anglophone, le Canada envisage offrir un soutien financier au Cameroun. Il est question d’apporter 6,65 millions de dollars canadiens (plus de 2 milliards francs CFA), en aide humanitaire, pour l’année 2019. Le financement est destiné à répondre aux besoins urgents des populations touchées par le conflit dans les régions du Nord-Ouest et du Sud-Ouest, et qui inclue les besoins spécifiques des femmes et des filles. | | | | | | | | | | | | | | | |  |
|  |  | | | | | | | | | | | | | | | |  |
|  | | | **Internals\\Bamenda Online articles** | | | | | | | | | | | | | |  |
| No |  |  |  | 0.0010 |  | 1 | |  | | | | | |
|  | | |  |  |  |  |  |  |  | |  | | | | | | |
|  | | | | | | | | | | | | 1 |  | CP |  | 12/8/2022 1:23 AM |  |
|  | Handing over the financial package to the victims today, May 5, 2017, at a brief ceremony held at the Bamenda Congress Hall, North West Governor, Adolph Lele L’Afrique challenged them to put the money into effective use so that they can start their businesses anew.   A total of 73,700,000 FRS was distributed to the victims. The six affected lockup stores shared a total 20 million FRS, 475,000 FRS each to the 91 temporal sheds and 100,000 FRS each for the 12 trading tables that were razed to the ground in the fire incident. | | | | | | | | | | | | | | | |  |
|  |  | | | | | | | | | | | | | | | |  |
|  | | | **Internals\\Cameroon Tribune** | | | | | | | | | | | | | |  |
| No |  |  |  | 0.0081 |  | 7 | |  | | | | | |
|  | | |  |  |  |  |  |  |  | |  | | | | | | |
|  | | | | | | | | | | | | 1 |  | CP |  | 1/21/2023 1:32 AM |  |
|  | Nora Ndem, actrice camerounaise, a remis des produits de première nécessité dimanche à Bonabéri. Des sacs de riz, de pâtes alimentaires, des cartons de lait, de sucre, d’huile, de tomate en conserve, de savon, des paquets de papier et de serviettes hygiéniques, des répulsifs anti-moustiques, etc. Ce sont les produits de première nécessité apportés par Nora Ndem, actrice et mannequin camerounais, aux déplacés internes venus du Nord-Ouest et du Sud-Ouest et basés à Bonabéri Bloc 6, quartier Minkwele-Bonendalè, dans l’arrondissement de Douala IV. C’était lors d’une remise de dons dimanche 6 janvier 2018, dans le cadre de l’initiative « IDP Support ». IDP pour Internally Displaced Persons. | | | | | | | | | | | | | | | |  |
|  |  | | | | | | | | | | | | | | | |  |
|  | | | | | | | | | | | | 2 |  | CP |  | 1/21/2023 1:41 AM |  |
|  | La cérémonie de remise a été présidée par le ministre des Enseignements secondaires, Pr.Nalova Lyonga samedi 13 janvier à Bafang. Blanche Nicaise Shuri, une élève déplacée de la région du Nord-Ouest n’a pas caché son émotion samedi ,13 janvier 2019, après avoir reçu des mains du ministre des Enseignements secondaires, le Pr.Nalova Lyonga une bourse scolaire de 50 000 F. Cet argent valui permettre de poursuivre ses études, après que sa famille a fui cette région en crise. Comme elle, ils sont au total 100 jeunes des lycées et collèges, dont 30 élèves déplacés des régions du Nord-ouest et du Sud-ouest à avoir reçu des bourses scolaires d’une valeur de 50 000 F samedi dernier à Bafang, département du Haut-Nkam. Ce don est l’œuvre d’un fils de ce département, Brice Tchoualeu, à travers la Fondation HYE (Helping Youth Through Education) qu’il dirige. Ce jeune qui évolue dans la diaspora s’est souvenu de son pays, le Cameroun, et | | | | | | | | | | | | | | | |  |
|  |  |
|  |  | | | | | | | | | | | | | | | |  |
|  | | | | | | | | | | | | 3 |  | CP |  | 1/21/2023 1:57 AM |  |
|  | Mayor Ekema Patrick Esunge handed the parcels to the pupils and students on August 30, 2019, at the Buea Council Hall. 2000 Pupils and students drawn from Bonjongo, Muea, Bonavanda and Buea Central Court Areas that made up the Buea Municipality are beginning school today with most of their school needs provided. The Mayor of Buea Council, Ekema Patrick Esunge, handed to each child, on Friday August 30, 2019, a school bag that contained exercise books, pens, pencils, rulers etc. Head Teachers of all Government Nurseries and Primary Schools in Buea Municipalityeach received large consignments of teaching materials that consisted ofpackets of chalks, packets of blue pens, black rulers, reams of papers, paper founders, coloured chalk, rakes, shovels etc. Their First Aid boxes were also reinforced | | | | | | | | | | | | | | | |  |
|  |  | | | | | | | | | | | | | | | |  |
| Reports\\Coding Summary By Node Report | | | | | | | | | | Page 46 of 140 | | | | | | | |
| 1/21/2023 3:37 PM | | | | | | | | | | | | | | | | | |
|  | | | **Aggregate** |  | **Classification** |  | **Coverage** |  | **Number Of Coding References** | |  | **Reference Number** |  | **Coded By Initials** |  | **Modified On** |  |
|  | | | | | | | | | | | | | | | | | |
|  | | | | | | | | | | | | 4 |  | CP |  | 1/21/2023 2:05 AM |  |
|  | Some 35 women from the North West and South Regions will benefit from the 10 million FCFA initiative sponsored by another widow, Mrs. Jumbam Rebecca Seh. One of the consequences of the ongoing armed conflict in the North West and South West Regions is the plight of women who lose their husbands. Apart from having to cope with the trauma of the loss, these hapless women often struggle to fend for themselves and their children. Moved by their plight, a Yaounde-based lady, Mrs. Jumbam Rebecca Seh, from August 7-8, 2020 in Yaounde gathered 20 widows from the crisis resident in the North West and South West Regions. Mrs. Jumbam lost her husband to the war on March 28, 2020. Addressing | | | | | | | | | | | | | | | |  |
|  |  | | | | | | | | | | | | | | | |  |
|  | | | | | | | | | | | | 5 |  | CP |  | 1/21/2023 2:07 AM |  |
|  | spent Christmas with food items generously offered by their son and Minister Delegate at the Ministry of External Relations, Felix Mbayu. The neighborhood of Old Town, the birth place of Metropolitan Bamenda spent the feast of Christmas on December 25th 2019 with little to worry about. There was enough to show for food items with their son; who doubles as the Minister Delegate at the Ministry of External Relations, Felix Mbayu to thank for helping matters with 55 bags of rice, 25 cartons of groundnut oil, 25 cartons of maggi and 25 cartons of tomatoes. Beneficiaries were virtually all the households of Old Town which covers the quarters of Ntambag I, II and III. The food items, worth about 4.2 million FCFA were received with gratitude by inhabitants in difficult times when the socio-political and security crisis | | | | | | | | | | | | | | | |  |
|  |  | | | | | | | | | | | | | | | |  |
|  | | | | | | | | | | | | 6 |  | CP |  | 1/21/2023 4:28 AM |  |
|  | An Agreement has been signed with some 18 North West and South West based civil society organisations for infrastructure and livelihood development. A quick return to normalcy in the North West and South West regions preoccupies the United Nations Development Programme, UNDP, whose small grants initiative to help matters inspires hope for many, suffering the consequences of the socio-political and security crisis rocking the regions. In effect, the UNDP has signed MOUs with some 18 North West and South West-based Civil Society Organisations to promote early economic recovery and social cohesion, support infrastructure and livelihood recovery in the affected regions. All beneficiary CSOs have received FCFA 180 million to fund projects that address livelihood issues, but also community dialogue, economic recovery and social cohesion through sports. The MOU event on 31st July, 2019 stressed the need for contributions to the wider effort of the Cameroon government and UN Agencies in Cameroon to promote social cohesion, reduce vulnerability and assist efforts in the North West and South West. It was against this backdrop, that the Resident Representative of the UNDP, Jean Luc Stalon said his organization’s strategic support to Cameroon's development agenda for 2018-2020 is based on UN development assistance framework. It is all about support that | | | | | | | | | | | | | | | |  |
|  |  |
|  |  | | | | | | | | | | | | | | | |  |
|  | | | | | | | | | | | | 7 |  | CP |  | 1/21/2023 4:29 AM |  |
|  | The gifts from the presidential convoy transported in about 100 truckloads will be shared to internally displaced person in both regions. A huge humanitarian convoy from the presidential couple containing foodstuffs, sanitary kits and bedding equipment has arrived the North West and South West Regions for onward distribution to internally displaced persons affected by the ongoing sociopolitical situation in both regions. The about 100 truckloads of items left Yaounde, Douala and Bafoussam on December 28, 2019. Territorial Administration Minister, Paul Atanga Nji, accompanied by the Governor for the Centre Region and some members of the United Nations agencies supervised the departure of 40 trucks leaving the esplanade of the Yaounde City Town Hall for the regions. Ahead of the departure, Minister Atanga Nji, said the gesture from the presidential couple is clear prove that necessary measures have been taken to provide humanitarian assistance to the population. “It is equally an indication that there is no humanitarian crisis in Cameroon as the situation of internally | | | | | | | | | | | | | | | |  |
|  |  |
|  |  | | | | | | | | | | | | | | | |  |
|  | | | **Internals\\EcoMatin** | | | | | | | | | | | | | |  |
| No |  |  |  | 0.0132 |  | 4 | |  | | | | | |
|  | | |  |  |  |  |  |  |  | |  | | | | | | |
|  | | | | | | | | | | | | 1 |  | CP |  | 12/9/2022 2:42 AM |  |
|  | Entre autres, l’allocation d’un budget estimé à 12,7 milliards FCFA pour assister 74 994 personnes dans le Nord-Ouest et le Sud-Ouest, sur la période 2018-2019.  Dévoilé depuis le 21 juin 2018, ce Plan d’assistance humanitaire d’urgence pour les régions du Nord-Ouest et du Sud-Ouest, a déjà approvisionné 60 345 victimes et déplacés internes en denrées alimentaires dans 12 arrondissements réparties dans les deux régions, à en croire le ministre de la Communication, René Emmanuel Sadi, et le ministre de l’Administration | | | | | | | | | | | | | | | |  |
|  |  | | | | | | | | | | | | | | | |  |
|  | | | | | | | | | | | | 2 |  | CP |  | 12/9/2022 2:52 AM |  |
|  | Selon le membre du gouvernement, 982 millions FCFA ont été débloqués pour la reconstruction des salles de classes au Nord-Ouest et 712 millions FCFA dans le Sud-Ouest. Les établissements du privé reçoivent, quant à eux, une aide de 855 millions FCFA.  Toujours selon le Minedub, une somme de 354 millions FCFA a été allouée en vue de subventionner des écoles dans le NO et 253 millions FCFA dans le SO.  Après calcul, ces ressources financières vont valoir environ 3,157 milliards de FCFA à l’Etat. | | | | | | | | | | | | | | | |  |
|  |  | | | | | | | | | | | | | | | |  |
|  | | | | | | | | | | | | 3 |  | CP |  | 12/10/2022 12:21 AM |  |
|  | Le déploiement de ce dispositif gouvernemental doté d’un budget de 12,7 milliards Fcfa est coincé, alors que près de 500.000 personnes sont menacées de famine dans les deux régions anglophones. | | | | | | | | | | | | | | | |  |
|  |  | | | | | | | | | | | | | | | |  |
| Reports\\Coding Summary By Node Report | | | | | | | | | | Page 47 of 140 | | | | | | | |
| 1/21/2023 3:37 PM | | | | | | | | | | | | | | | | | |
|  | | | **Aggregate** |  | **Classification** |  | **Coverage** |  | **Number Of Coding References** | |  | **Reference Number** |  | **Coded By Initials** |  | **Modified On** |  |
|  | | | | | | | | | | | | | | | | | |
|  | | | | | | | | | | | | 4 |  | CP |  | 12/10/2022 12:33 AM |  |
|  | 26 milliards de dollars américains, soit environ 15 199 milliards Fcfa, sont nécessaires pour venir en aide à environ 94 millions de personnes dans le besoin. Jusqu’à présent, les pays donateurs ont fourni environ 7 milliards de dollars, soit 27% de l’argent nécessaire, selon la plateforme de suivi financier de l’Organisation des Nations unies (Onu). Cela représente environ 2 milliards de dollars de moins qu’à la même période l’année dernière lorsque 35% des plans de réponses humanitaires étaient financés. Il est à noter qu’au plan interne, le gouvernement camerounais et les Ong ne s’accordent pas toujours sur le nombre de personnes impactées par les crises que traverse le pays.  Dans le Nord-Ouest et le Sud-Ouest, le ministre de l’Administration | | | | | | | | | | | | | | | |  |
|  |  | | | | | | | | | | | | | | | |  |
|  | | | **Internals\\La voix du centre** | | | | | | | | | | | | | |  |
| No |  |  |  | 0.0113 |  | 3 | |  | | | | | |
|  | | |  |  |  |  |  |  |  | |  | | | | | | |
|  | | | | | | | | | | | | 1 |  | CP |  | 12/11/2022 2:45 AM |  |
|  | Près de 2 Milliards de FCFA mises à disposition pour booster les jeunes à renforcer leurs capacités en interne afin d’éviter le mal être des causes d’une migration mal organisée  Il est on ne peut plus clair que, le contexte sociopolitique actuel que vit l’Etat du Cameroun notamment des crises dans sa partie anglophone du nord-ouest et du sud-ouest et aussi, les exactions de Boko-haram dans le grand nord, favorisent une migration vers l’inconnu peu ou prou organisée. Le but étant bien sûr d’aller à la recherche du mieux être.  Le cas du Cameroun en est fort révélateur. En effet, le pays d’Eto’o Fils se vide chaque année de | | | | | | | | | | | | | | | |  |
|  |  | | | | | | | | | | | | | | | |  |
|  | | | | | | | | | | | | 2 |  | CP |  | 12/11/2022 2:56 AM |  |
|  | Le don constitué des gels hydroalcooliques, des masques de protection, des cartons de savon, des sacs de riz, des huiles végétales et bien d’autres denrées alimentaires de première nécessité, a été remis aux victimes des guerres dans le Noso, accueillies par des particuliers dans la ville aux sept collines | | | | | | | | | | | | | | | |  |
|  |  | | | | | | | | | | | | | | | |  |
|  | | | | | | | | | | | | 3 |  | CP |  | 12/11/2022 3:28 AM |  |
|  | Suite à l’aggravation de la crise anglophone dans le Nord et le Sud-Ouest, le président de la République a mis en place un plan d’urgence humanitaire pour une extinction totale de la crise. Ledit plan a été présenté le mercredi 20 juin 2018 par le chef de gouvernement Philémon Yang, qui était accompagné à l’occasion des membres du gouvernement.  La situation dans ces deux parties du pays est très alarmante. Jadis, ceux-là qui se font appeler sécessionnistes posaient des actes de violence qui donnaient une psychose aux populations. Ces populations, se sont déplacées dans les pays voisins pour cause d’actes de barbaries. Cette situation est devenue de plus en plus grave dans le sens où ces dits séparatistes ont fait des enlèvements qui ont s’en sont suivis par des meurtres. Les sécessionnistes sont encore allés plus loin, en décapitant un enseignant tout en le mettant dans une marmite pour une cuisson.  Dans le but de ramener la paix, la sérénité et la tranquillité dans ces zones, le président de la République Paul Biya a pour la circonstance mis en place un plan d’urgence humanitaire pour les deux régions. Ce plan permettra de: rétablir un cadre de vie propice à l’épanouissement et au développement des communautés affectées par la situation sociopolitique dans le Nord et le Sud-Ouest ; apporter une assistance humanitaire d’urgence aux populations en détresse ; assurer la réinsertion socio-économique des populations et enfin promouvoir la cohésion sociale et le vivre ensemble tout en rétablissant les infrastructures qui ont été détruites. Et pour cela, le gouvernement devra implémenter son action dans les domaines de l’accès au logement, la fourniture des denrées alimentaires et des produits de nécessités, l’éducation, le logement, la protection et la reconstitution des documents individuels. Il a à cet effet appelé les ministères en charge | | | | | | | | | | | | | | | |  |
|  |  |
|  |  |
|  |  | | | | | | | | | | | | | | | |  |
|  | | | **Internals\\the post newspaper** | | | | | | | | | | | | | |  |
| No |  |  |  | 0.0023 |  | 1 | |  | | | | | |
|  | | |  |  |  |  |  |  |  | |  | | | | | | |
|  | | | | | | | | | | | | 1 |  | CP |  | 12/11/2022 10:45 PM |  |
|  | The Government of Cameroon has announced an FCFA 12.7 Billion Emergency Humanitarian Assistance Plan for the Northwest and Southwest Regions.  The plan was unveiled on June 20 by Prime Minister and Head of Government, Philemon Yang, during a press briefing in the conference room of his cabinet.  The call for solidarity to finance the humanitarian plan, according to the Prime Minister, is not new, because, a similar show was recorded in the case of the humanitarian crisis caused by Boko Haram. | | | | | | | | | | | | | | | |  |
|  |  | | | | | | | | | | | | | | | |  |
|  | | | | | | | | | | | | | | | | | |
| Reports\\Coding Summary By Node Report | | | | | | | | | | Page 48 of 140 | | | | | | | |
| 1/21/2023 3:37 PM | | | | | | | | | | | | | | | | | |
|  | | | **Aggregate** |  | **Classification** |  | **Coverage** |  | **Number Of Coding References** | |  | **Reference Number** |  | **Coded By Initials** |  | **Modified On** |  |
|  | | | **Internals\\the sun newspaper** | | | | | | | | | | | | | |  |
| No |  |  |  | 0.0016 |  | 2 | |  | | | | | |
|  | | |  |  |  |  |  |  |  | |  | | | | | | |
|  | | | | | | | | | | | | 1 |  | CP |  | 12/4/2022 12:03 AM |  |
|  | The Bamenda Ecclesiastical Province has announced the creation of a fund to support those affected by the violence during demonstrations in the Anglophone regions of the country.  The announcement was made by the Auxiliary Archbishop of the Bamenda Ecclesiastical Province, Michael Miabesue Bibi on Saturday October 14, 2017 during a mass to pray for those who have lost their lives during the Anglophone crisis.  The Auxiliary Bishop asked Christians to pray for all those who shot others to death and those who ordered for their shooting. Without stating clearly the angle of this prayer request, the prelate emphasized that, “Only God gives life and only God should take lives”.  The church which is the moral pillar in every society has continually played her role since the start of the Anglophone crisis as a mediator and the broker of peace for all, by looking at the evolution of Cameroon history objectively and making pertinent suggestions to government on the way forward. | | | | | | | | | | | | | | | |  |
|  |  |
|  |  | | | | | | | | | | | | | | | |  |
|  | | | | | | | | | | | | 2 |  | CP |  | 12/12/2022 1:42 AM |  |
|  | The Bamenda Ecclesiastical Province has announced the creation of a fund to support those affected by the violence during demonstrations in the Anglophone regions of the country.  The announcement was made by the Auxiliary Archbishop of the Bamenda Ecclesiastical Province, Michael | | | | | | | | | | | | | | | |  |
|  |  | | | | | | | | | | | | | | | |  |
|  | **Nodes\\Hostage** | | | | | | | | | | | | | | | |  |
|  | | **Document** | | | | | | | | | | | | | | |  |
|  | | | **Internals\\237 online** | | | | | | | | | | | | | |  |
| No |  |  |  | 0.0168 |  | 12 | |  | | | | | |
|  | | |  |  |  |  |  |  |  | |  | | | | | | |
|  | | | | | | | | | | | | 1 |  | CP |  | 12/6/2022 1:08 AM |  |
|  | 5 filles, 7 garçons c’est le nombre d’étudiants de l’Université de Bamenda enlevés hier mardi 11 décembre 2018 à Bamenda alors qu’ils allaient aux cours à croire à la vidéo ci-dessous.  Un regard hagard, signe de psychose se lit sur le visage de cette dizaine de jeunes. Les séparatistes Ambazoniens qui les ont pris en otage disent vouloir passer un message fort aux étudiants de l’Université de Bamenda qui ne prennent pas leur avertissement de ne plus se rendre au campus au sérieux.  Ils font la promesse de libérer ceux enlevés mais souligne que les prochains étudiants qu’ils arrêtont seront tout simplement assassinés car, fustigent-ils il ne peuvent pas mettre un terme à l’école pour se battre pour la libération de l’Ambazonie quand les autres vont à l’école.  Hier en journée on voyait dans une vidéo les étudiants de l’Université de Bambili à Bamenda qui couraient partout au campus lorsque les Ambazoniens y ont fait irruption et ont commencé à tirer en l’air. | | | | | | | | | | | | | | | |  |
|  |  |
|  |  | | | | | | | | | | | | | | | |  |
|  | | | | | | | | | | | | 2 |  | CP |  | 12/6/2022 1:12 AM |  |
|  | Depuis le samedi, 3 novembre 2018, l’on est sans nouvelle de Nwa Martin Nanjong, le sous-préfet de l’arrondissement de Noni, dans le département du Bui, région du Nord-Ouest.  Selon des sources concordantes, il a été kidnappé par des hommes armés, alors qu’il revenait de Bamenda.  Administrateur civil ayant travaillé par le passé dans la chaudière de Balik*umbat, département du Ngoketunjia, il était en poste depuis le 4 septembre 2017, suite au décret présidentiel n°2017/461 nommant des sous-préfets. Après les sous-préfets de Batibo, de Ngye, de Misaje et Menchum Valley, Nwa Martin Nanjong est le cinquième sous-préfet attaqué dans cette région par des présumés séparatistes. Mis à part le cas inextricable de Namata Diteng, ex-sous-préfet de Batibo, d’autres avant lui ont eu la chance d’être relaxés saufs. | | | | | | | | | | | | | | | |  |
|  |  |
|  |  | | | | | | | | | | | | | | | |  |
|  | | | | | | | | | | | | | | | | | |
| Reports\\Coding Summary By Node Report | | | | | | | | | | Page 49 of 140 | | | | | | | |
| 1/21/2023 3:37 PM | | | | | | | | | | | | | | | | | |
|  | | | **Aggregate** |  | **Classification** |  | **Coverage** |  | **Number Of Coding References** | |  | **Reference Number** |  | **Coded By Initials** |  | **Modified On** |  |
|  | | | | | | | | | | | | | | | | | |
|  | | | | | | | | | | | | 3 |  | CP |  | 12/6/2022 1:50 AM |  |
|  | Le chef traditionnel de Wotutu, une localité de l’arrondissement de Buea (région du Sud-Ouest), a été enlevé mercredi après-midi par des hommes armés, selon des sources locales.  Chief John Elate a été enlevé par des hommes armés ce mercredi 12 septembre 2018, alors qu’il descendait d’une moto après un déplacement dans la ville voisine de Limbe. Selon des sources concordantes, Chief Elate s’était réfugié dans cette ville à la suite des combats incessants entre les forces de sécurité et les milices armées, qui secouent la ville de Buea. Les mêmes sources indiquent qu’il a été récupéré sur sa moto et a été transporté sur une autre moto par ses ravisseurs, vers une destination inconnue.  Les chefs traditionnels sont la cible des forces séparatistes depuis quelques semaines. Le weekend dernier, le chef traditionnel d’Oku a été libéré après avoir passé plusieurs jours en captivité, tout comme le Fon de Bafut, lui aussi enlevé avant sa libération quelques jours plus tard. En août, sept chefs traditionnels des villages proches de Buea avaient été libérés après avoir passé des semaines en captivité. L’un d’entre eux est décédé au cours de ce kidnapping.  L’enlèvement de chief John Elate est le dernier incident survenu à Wotutu, une localité dans laquelle l’ambiance est de plus en plus tendue ces dernières semaines, notamment en raison des violents affrontements qui opposent les forces de sécurité et les combattants armés qui ont fait | | | | | | | | | | | | | | | |  |
|  |  |
|  |  | | | | | | | | | | | | | | | |  |
|  | | | | | | | | | | | | 4 |  | CP |  | 12/6/2022 1:53 AM |  |
|  | Le proviseur du lycée bilingue de Mankon aurait été enlevé jeudi au sein de l’établissement.  André Gabiassi, professeur de français et proviseur du lycée bilingue de Mankon, aurait été enlevé jeudi matin vers 10 h, alors qu’il se préparait à présider une réunion du personnel, selon des sources. Les forces de sécurité sont immédiatement arrivées sur les lieux, mais les ravisseurs ont emmené le proviseur à une destination inconnue.  Aucun groupe n’a jusqu’ici revendiqué l’enlèvement et une déclaration officielle est toujours attendue.André Gabiassi a été kidnappé à la suite d’une série d’incidents survenus sur les campus des régions du Nord-Ouest et du Sud-Ouest du Cameroun depuis le début de la nouvelle année scolaire. Un proviseur a été enlevé à Bafut, torturé puis relâché. En ce moment, il est pris en charge dans une formation hospitalière. | | | | | | | | | | | | | | | |  |
|  |  |
|  |  | | | | | | | | | | | | | | | |  |
|  | | | | | | | | | | | | 5 |  | CP |  | 12/6/2022 11:31 PM |  |
|  | Diguengue Patrice a été kidnappé entre les localités de Njinikom et Belo le 5 juin 2018.  Des sources auprès de la 5e région de gendarmerie du Nord-Ouest rapportent que l’inspecteur de police Diguengue Patrice, originaire du département du Mayo-Danay (région de l’Extrême-Nord) et en service au commissariat de sécurité publique de Fundong dans le Nord-Ouest, a été enlevé le mardi 5 juin 2018 par un groupe armé entre Njinikom et Belo dans le département du Boyo.  Des photos postées sur des réseaux sociaux ce 6 juin 2018 par ses ravisseurs, montrent l’infortuné assis à même le sol avec les pieds enchainés et les chaines sécurisées par deux cadenas. Sur le visage de l’otage, l’on peut bien lire le calvaire qu’il traverse.  Depuis le début de cette année, plusieurs personnes ont été enlevé dans la localité de Belo. Le 30 avril 2018 par exemple, des assaillants avaient fait une incursion dans une chapelle de la localité et le Père William Neba, principal du collège privée confessionnel d’enseignement secondaire, St Bedes, avait été enlevé.  Dans son rapport mensuel publié le 2 juin 2018, l’Organisation Non-Gouvernementale l’International Crisis Group, relève que le mois de mai a été caractérisé par des enlèvements et des assassinats dans les régions du Nord-Ouest et du Sud-Ouest. L’association belge estime qu’au moins 60 personnes ont été tué en mai 2018 dans les deux régions. L’organisation prévient que juin 2018 pourrait être plus sanglante dans cette partie du pays. Elle invite l’église catholique à engager le dialogue avec les différentes factions en conflit pour éviter ces actes de violence. | | | | | | | | | | | | | | | |  |
|  |  |
|  |  |
|  |  | | | | | | | | | | | | | | | |  |
|  | | | | | | | | | | | | 6 |  | CP |  | 12/6/2022 11:41 PM |  |
|  | Ils ont été kidnappés en fin de semaine dernière par des hommes armés non identifiés.  Georgiana Enanga Sanga, proviseur de l’établissement secondaire publique (GHS) Bolifamba Mile 16-Buea et Eric Ngoumba, principal de l’Académie baptiste camerounaise Yoke-Muyuka, ont été kidnappés le vendredi 25 mai 2018.  Selon Stephen Nganje, président de l’association des parents d’élèves du lycée de Bolifamba, le véhicule transportant le proviseur a été intercepté par des hommes armés à quelques mètres du campus du lycée, alors qu’elle se préparait à boucler l’année scolaire 2017/2018.  Quatre hommes armés ont stoppé le chauffeur sous la menace de leurs armes. D’après des personnes ayant assisté à la scène, les inconnus n’ont pas cédé aux supplications de l’enseignante. Ils l’ont enlevée et conduite vers une destination inconnue.  Informées de l’incident, les forces de sécurité ont pris d’assaut le lycée de Bolifamba Mile 16-Buea, mais il était trop tard, car les ravisseurs avaient quitté les lieux. | | | | | | | | | | | | | | | |  |
|  |  |
|  |  | | | | | | | | | | | | | | | |  |
|  | | | | | | | | | | | | 7 |  | CP |  | 12/6/2022 11:43 PM |  |
|  | Le proviseur du lycée bilingue (GBHS) de Buea, Mme Enanga Georgiana Sanga, a été kidnappée par des inconnus ce 25 mai 2018 vers 8 heures du matin alors qu’elle se rendait au lycée comme à l’accoutumé.  La circulation des motos étant interdite, des témoins affirment avoir vu Madame le proviseur transportée à une destination inconnue à l’aide d’un vélo.  Bien que l’information soit à cette heure très sommaire, il est toutefois répandu dans la ville que des personnes se réclamant d’un groupe de défense de l’Ambazonie sont à l’origine du kidnapping de Mme Enanga. Elle est accusée d’avoir en complicité avec les forces de défenses obligée ses élèves à défiler le 20 mai, jour de la fête de l’unité nationale. | | | | | | | | | | | | | | | |  |
|  |  |
|  |  | | | | | | | | | | | | | | | |  |
| Reports\\Coding Summary By Node Report | | | | | | | | | | Page 50 of 140 | | | | | | | |
| 1/21/2023 3:37 PM | | | | | | | | | | | | | | | | | |
|  | | | **Aggregate** |  | **Classification** |  | **Coverage** |  | **Number Of Coding References** | |  | **Reference Number** |  | **Coded By Initials** |  | **Modified On** |  |
|  | | | | | | | | | | | | | | | | | |
|  | | | | | | | | | | | | 8 |  | CP |  | 12/6/2022 11:46 PM |  |
|  | Il a été Kidnappé dans la localité de Menji, chef-lieu du département dudit département, le 20 mai 2018.  Une autorité administrative camerounaise de plus, en service dans la région du Sud-Ouest, vient de tomber dans les mailles des filets des sécessionnistes. Le 20 mai 2018 en effet, le deuxième adjoint préfectoral du Lebialem dans le Sud-Ouest a été kidnappé par des éléments du groupe sécessionniste dénommé «Red Dragons », selon une source bien introduite auprès des services du gouverneur de la région du Sud-Ouest.  Sur une vidéo diffusée ce 21 mai 2018 sur les réseaux sociaux par les séparatistes, on y voit l’autorité administrative brandissant contre son gré le drapeau de l’Ambazonie lors de l’exécution de leur hymne par les adeptes du mouvement séparatiste, en majorité des jeunes des deux s*e*xes, armes à la main.  Une image on ne peut plus humiliante et choquante pour tout Camerounais qui espère à l’unité nationale de ce pays qui vient de célébrer sa 46è édition du « Vivre ensemble », si cher au président de la République, Paul Biya.  A titre de rappel, il importe de relever que plusieurs autorités du pays payent déjà le prix de ce bras de fer entre le gouvernement camerounais et le mouvement sécessionniste, parmi lesquels on peut citer le sous-préfet de Batibo, enlevé le 11 février 2018 et deux semaines après, le délégué régional des Affaires sociales pour le Nord-Ouest. Et pas plus tard que le 19 mai dernier, le maire de Bangem, dans la région du Sud-Ouest Cameroun, et son adjoint ont été kidnappés alors qu’ils procédaient à la distribution des gadgets relatifs à la Fête nationale du 20 mai. | | | | | | | | | | | | | | | |  |
|  |  |
|  |  |
|  |  | | | | | | | | | | | | | | | |  |
|  | | | | | | | | | | | | 9 |  | CP |  | 12/6/2022 11:49 PM |  |
|  | La victime et sa compagne avaient été kidnappées le 08 mai au village Golo, dans la commune d’Ekondo-Titi.  Leurs dépouilles ont été retrouvées deux jours plus tard dans une autre localité.  Le défunt s’appelait Takang Elvis Ayuke. Il avait rejoint le corps de la Gendarmerie nationale en 2013 et était en service au peloton 812 à Ekondo-Titi (département du Ndian). Sa dépouille a été retrouvée en cours de putréfaction dans la localité de Lipenja, deux jours après son kidnapping à Golo.  Tout commence le 08 mai. Le gendarme Takang Elvis Ayuke se rend à Kumba pour toucher son argent. Il est accompagné de sa petite amie (une jeune femme originaire de la région de l’Est, apprend-on). En cours de route, ils sont attaqués par des individus armés qui les conduisent vers une destination inconnue.  Des battues sont organisées pour retrouver ces deux personnes dans un contexte marqué par la violence à Ekondo-Titi. Les corps sont retrouvés le 10 mai. Celui de la jeune fille avait déjà été enterré tandis que celui-du soldat gisait en pleine brousse.  Une équipe composée de certains éléments du Bataillon des fusiliers marins (Bafumar) et des gendarmes est dépêchée pour aller déposer les corps à la morgue. En cours de route, non loin du village Konye, ils subissent aussi une attaque. Deux blessés sont enregistrés parmi les forces de défense et de sécurité. | | | | | | | | | | | | | | | |  |
|  |  |
|  |  | | | | | | | | | | | | | | | |  |
|  | | | | | | | | | | | | 10 |  | CP |  | 12/6/2022 11:54 PM |  |
|  | L’ancien vice-président de la Cour d’appel de la région camerounaise du Sud-Ouest, Mbeng Martin, a été enlevé très tôt dimanche matin, portant à quatre le nombre des membres des autorités kidnappés par des présumés sécessionnnistes anglophones.  Le juge a été enlevé dans la petite localité de Ewelle alors qu’il assistait aux funérailles de sa mère. « Les individus un peu nombreux ont débarqué de nulle part à bord des véhicules en prenant le juge et aussitôt répartis. Alertées, les forces de défense ont engagé des recherches pour le retrouver« .  L’information a été confirmée par le centre pour les droits de l’homme et la démocratie pour l’Afrique que dirige Agbor Nkongho qui déplore par ailleurs le kidnapping des autorités ainsi que la demande de rançon. Pour le moment, aucune information officielle n’a filtré sur cet enlèvement.  L’identité de ravisseurs n’est pas encore établie. Mais les soupçons sont orientés vers les sécessionnistes de l’Ambazonie, Etat auto-proclamé regroupant les deux régions anglophones du Cameroun, qui ont fait des kidnapping leur mode opératoire.  Le 3 avril dernier, le ministre camerounais de la communication, Issa Tchiroma Bakary, annonçait lors d’une conférence de presse la libération par l’armée d’une douzaine de touristes expatriés, dont sept suisses et cinq italiens. Dans la même série des enlèvements, figue celle du président du conseil d’administration du General Certificate of Education Board et une trentaine de personnes avaient été enlevés alors qu’ils se rendaient à un meeting de remerciement.  Pour l’avocat Agbor Nkongho, les enlèvements témoignent la détérioration de la crise anglophone et en appelle au dialogue entre les différentes parties prenantes. « Pour mettre un terme à l’impasse, toutes les parties doivent rechercher des négociations constructives qui conduiront à un règlement pacifique, à une stabilité à long terme et à l’égalité des chances pour tous les citoyens« , a-t-il indiqué. | | | | | | | | | | | | | | | |  |
|  |  |
|  |  |
|  |  | | | | | | | | | | | | | | | |  |
|  | | | | | | | | | | | | 11 |  | CP |  | 12/7/2022 12:19 AM |  |
|  | Encore un kidnaping d’une autorité par des individus non indentifiés. Le Professeur Ivo Leke Tambo, PCA de GCE Board a été enlevé ce samedi ainsi que 35 autres personnes à Lebialem au lieu dit Fondem dans arrondissement d’Alou par des personnes non identifiées.  D’après les informations parvenues à la rédaction, le nouveau président du conseil d’administration du Certificat général d’éducation du Cameroun (Conseil de la GCE) récemment nommé par Paul Biya, il y a presque 2 mois, était à une marche pacifique de remeriement à Paul Biya pour avoir nommé Paul Tsong Ministre délégué au MINEPAT chargé de la planification.  Difficile de dire pour l’instant, l’endroit où le PCA de GCE Board et ancien SG au Minsec a été conduit. L’identité des 35 autres personnes enlevées reste aussi à être precisée. | | | | | | | | | | | | | | | |  |
|  |  |
|  |  | | | | | | | | | | | | | | | |  |
| Reports\\Coding Summary By Node Report | | | | | | | | | | Page 51 of 140 | | | | | | | |
| 1/21/2023 3:37 PM | | | | | | | | | | | | | | | | | |
|  | | | **Aggregate** |  | **Classification** |  | **Coverage** |  | **Number Of Coding References** | |  | **Reference Number** |  | **Coded By Initials** |  | **Modified On** |  |
|  | | | | | | | | | | | | | | | | | |
|  | | | | | | | | | | | | 12 |  | CP |  | 12/7/2022 12:27 AM |  |
|  | Des sources auprès des services du gouverneur de la région du Nord-Ouest révèlent que le délégué régional des Affaires Sociales pour le Nord-Ouest, Nimbom Arong Yong, a été enlevé samedi dernier par des hommes armés dans le village Nyen, localité située près d’Ambo, arrondissement de Batibo.  « Le délégué s’est rendu à Nyen samedi pour assister aux funérailles. Lui et son chauffeur ont été enlevés par une bande armée. Le chauffeur a été libéré plus tard. Quant au délégué régional, nous n’avons aucune nouvelle de lui depuis samedi », indique ce dimanche une source auprès des services du gouverneur du Nord-Ouest. | | | | | | | | | | | | | | | |  |
|  |  | | | | | | | | | | | | | | | |  |
|  | | | **Internals\\Bamenda Online articles** | | | | | | | | | | | | | |  |
| No |  |  |  | 0.0013 |  | 2 | |  | | | | | |
|  | | |  |  |  |  |  |  |  | |  | | | | | | |
|  | | | | | | | | | | | | 1 |  | CP |  | 12/7/2022 11:37 PM |  |
|  | Southern Cameroon's separatist leader, Sisiku Julius Ayuk Tabe, has been abducted in Nigeria.  A statement signed by Secretary of Communications and IT, Federal Republic of Ambazonia, Chris Anu, said Tabe was abducted by "gunmen from la Republic du Cameroun at about 19:30 pm in Nera Hotels, (Ekwueme Road), Abuja Nigeria on January 5, 2018." | | | | | | | | | | | | | | | |  |
|  |  | | | | | | | | | | | | | | | |  |
|  | | | | | | | | | | | | 2 |  | CP |  | 12/7/2022 11:50 PM |  |
|  | On February 16, 170 students, mostly girls under 18, were abducted by a group of armed separatists from a boarding school in Kumbo, in the North-West region of Cameroon. The separatists, who stormed the building in the early hours, also abducted a teacher and two guards. Everyone was released the following day amid rumours of ransoms being paid. The school remains closed. | | | | | | | | | | | | | | | |  |
|  |  | | | | | | | | | | | | | | | |  |
|  | | | **Internals\\Cameroon Tribune** | | | | | | | | | | | | | |  |
| No |  |  |  | 0.0012 |  | 1 | |  | | | | | |
|  | | |  |  |  |  |  |  |  | |  | | | | | | |
|  | | | | | | | | | | | | 1 |  | CP |  | 1/21/2023 3:45 AM |  |
|  | Lors d’un échange avec la presse mercredi à Yaoundé, le Conseil national de la Jeunesse dénonce la prise en otage des élèves. Mercredi dernier, le Conseil national de la Jeunesse du Cameroun (CNJC) a organisé une rencontre avec la presse, afin de se prononcer sur la crise dans les régions du Nord- Ouest et du Sud-Ouest. Car, comme l’a indiqué Jean Marc Afessi Mbafor, le président national du CNJC, depuis le début des événements, l’instance n’avait pas encore dit un mot sur cette situation. Les responsables régionaux du CNJC ont donc dénoncé « la prise en otage des jeunes élèves et étudiants », par des grévistes et appelé à la reprise des cours et au dialogue dans la zone anglophone. Les leaders des jeunes ont salué les efforts du gouvernement « qui n’a cessé la médiation, question de trouver des pistes de sortie de cette crise ». Par ailleurs, ils ont invité la jeunesse à être vigilante, à ne pas se laisser manipuler par qui que ce soit. « Heureusement malgré | | | | | | | | | | | | | | | |  |
|  |  |
|  |  | | | | | | | | | | | | | | | |  |
|  | | | **Internals\\La voix du centre** | | | | | | | | | | | | | |  |
| No |  |  |  | 0.0023 |  | 1 | |  | | | | | |
|  | | |  |  |  |  |  |  |  | |  | | | | | | |
|  | | | | | | | | | | | | 1 |  | CP |  | 12/11/2022 3:13 AM |  |
|  | Une déclaration du gouvernement Camerounais confirme l’enlèvement de 16 otages donc 4 Camerounais et onze Européens dans la région du Sud-Ouest Cameroun par les groupes sécessionnistes. Ils ont été libérés par l’armée Camerounaise ce 4 avril 2018.   Le gouvernement affirme que les 7 Suisses et les Italiens étaient en route vers l’un des sites touristiques de la région quand ils ont été enlevés. Jusque là aucun des groupes sécessionnistes n’a encore revendiqué ces enlèvements. Il y a juste un mois un ingénieur Tunisien avait été tué par ses ravisseurs dans la même région. | | | | | | | | | | | | | | | |  |
|  |  | | | | | | | | | | | | | | | |  |
|  | | | | | | | | | | | | | | | | | |
| Reports\\Coding Summary By Node Report | | | | | | | | | | Page 52 of 140 | | | | | | | |
| 1/21/2023 3:37 PM | | | | | | | | | | | | | | | | | |
|  | | | **Aggregate** |  | **Classification** |  | **Coverage** |  | **Number Of Coding References** | |  | **Reference Number** |  | **Coded By Initials** |  | **Modified On** |  |
|  | | | **Internals\\the post newspaper** | | | | | | | | | | | | | |  |
| No |  |  |  | 0.0028 |  | 1 | |  | | | | | |
|  | | |  |  |  |  |  |  |  | |  | | | | | | |
|  | | | | | | | | | | | | 1 |  | CP |  | 12/11/2022 10:40 PM |  |
|  | Some unidentified gunmen are reported to have kidnapped the President of the High Court of Wum, Justice Ntali Mukete Itoe, in the early hours of Wednesday, August 23 and whisked-off to an unknown destination.  Massive arrests and torture has been the order of the day since the incident happened. When re-enforcement was drafted in from Nkambe and Bamenda, most of the boys had escaped into the bushes, abandoning their homes and leaving behind their mothers and ground parents at the mercy of Gendarmes and elements of the Rapid Intervention Battalion, known by its French acronym as BIR.  Meanwhile, three weeks back | | | | | | | | | | | | | | | |  |
|  |  | | | | | | | | | | | | | | | |  |
|  | | | **Internals\\the sun newspaper** | | | | | | | | | | | | | |  |
| No |  |  |  | 0.0133 |  | 5 | |  | | | | | |
|  | | |  |  |  |  |  |  |  | |  | | | | | | |
|  | | | | | | | | | | | | 1 |  | CP |  | 12/4/2022 7:08 PM |  |
|  | On Saturday February 15, 2019, reports said gunmen abducted about 287 students of Saint Augustine’s College Nso, on the outskirts of the town of Kumbo in Cameroon’s restive English-speaking North West Region. We are yet to independently authenticate the figures.  The kidnapping, reminiscent of the 2014 abduction of 276 school girls in Chibok, Nigeria which brought Boko Haram into global consciousness, is only the latest indication of how volatile the Anglophone conflict has become since it erupted in 2016.  Saturday’s kidnappings also carry particular echoes of the most infamous abductions in the history of the Anglophone crisis — the 78 students and about four members of staff taken on November 5, 2018 from Presbyterian Secondary School (PSS) Nkwen, Bamenda.  The about 287 students, as well as the school’s principal – Father Polycarp Sallo Wirba, two security guards and others, were whisked off to an unknown location after an early morning attack on the school, The SUN learnt.  We learnt that the abductees were freed late on Sunday evening after they were forced to sing the Ambazonia anthem. | | | | | | | | | | | | | | | |  |
|  |  |
|  |  | | | | | | | | | | | | | | | |  |
|  | | | | | | | | | | | | 2 |  | CP |  | 12/4/2022 7:11 PM |  |
|  | When he was arrested by Ambazonian forces on his way back from Bamenda through Yang village between Njinikom and Fundong sub divisions in June 2018, many thought that was the end of his life, as has been the case with almost all uniform men abducted by Ambazonian activists since the escalation of the Anglophone crisis in the North West and South West regions of The Republic of Cameroon. However, Bemsi, a police officer in Fundong’s case was different, indeed different.  Bemsi was abducted and taken to a camp on his way back home to Fundong, during which he was carefully questioned and an investigation well carried out by the level headed Yang camp Amba fighters who treat the population much better as compared to the FundongAbuh camp fighters. When nothing was seen against him, they released him without any physical torture, though after the payment of a reasonable ransom.  However, the FundongAbuh camp seems to have recruited fighters who are totally not versed with their own environment and the people therein. Five junior fighters of the AbuhFundong camp on Thursday February 14, 2019 invaded the residence of Police officer Bemsi in Fundong at about 6:30pm and ordered him to follow them after asking him to hand them his gun which he said he hadn’t a gun. “They came in and asked me what I did for a living and I told them I was a police officer, then they exclaimed ‘aaarrh you be Ikelebe! So nawuna di shoot we killam? We go kill you today. After saying this they went into the rooms and scattered everywhere asking me to hand them my gun. I told them for my 25 years in the Police Force I have never needed a gun”. He said.  “They came out and picked up my woofer and asked for the keys of my bike, then they carried my generator and tied with other things which they collected from my house on the bike and they asked me to follow them. I tried to plead with them to go ahead with the things so I can follow them the next day, but they bullied me to stand up immediately. I asked if I could put on my shoes and they said no. They collected my uniforms and said they will dress me in one and kill me. We left and they flogged me from my house till we reached their camp in Ngwah. While one was going ahead with my bike and gadgets collected from my house, I was made to move on foot and forced to run even when I was tired such that my slippers slipped out and I hit my toe very hard on a stone injuring it badly. Even with this I was not pitied. They flogged me on my arms and back with whatever they lay hands on. Even my head was not safe from the whips.” He narrated on | | | | | | | | | | | | | | | |  |
|  |  |
|  |  |
|  |  |
|  |  | | | | | | | | | | | | | | | |  |
|  | | | | | | | | | | | | 3 |  | CP |  | 12/4/2022 7:14 PM |  |
|  | One other student was abducted on her way back from school alongside her friends. They were later freed after receiving severe beatings from those she described as ambazonian fighters. “When I went to school in the morning, they drove me for fees. When I was coming back, those boys saw me. I was walking with my friend so they made us to climb on their bike and took us to a strange place. They beat us with machetes. They pointed a gun at our faces, threatening to shoot us. They later made me to give my father’s number which they called and he came. They flogged us severely and afterwards we were released” the student narrated. After her terrific ordeal, she was rushed to a hospital for treatment, though she was psychologically traumatized. | | | | | | | | | | | | | | | |  |
|  |  | | | | | | | | | | | | | | | |  |
| Reports\\Coding Summary By Node Report | | | | | | | | | | Page 53 of 140 | | | | | | | |
| 1/21/2023 3:37 PM | | | | | | | | | | | | | | | | | |
|  | | | **Aggregate** |  | **Classification** |  | **Coverage** |  | **Number Of Coding References** | |  | **Reference Number** |  | **Coded By Initials** |  | **Modified On** |  |
|  | | | | | | | | | | | | | | | | | |
|  | | | | | | | | | | | | 4 |  | CP |  | 12/4/2022 7:21 PM |  |
|  | 20 members of the UB Football Boys team were taken into captivity in the morning hours of Wednesday March 20 while training at UB’s football pitch B (Wembley) ahead of the 2019 varsity games billed for Dschang.  Christopher Tambe Tiku, NCHRF South West Regional Secretary obtained the release of the twenty students by their captors late on Thursday night, Chemuta said in a statement.  The open letter to the President of the Republic dated March 22 reads in part:  “We have the honour most respectfully to inform you that, when the Regional Secretary of the National Commission on Human Rights and Freedoms (NCHRF) of the South West Region informed us that he had been contacted yesterday the 21st of March 2019 by those who kidnapped the students of the University of Buea and that he was with South West Authorities discussing steps for their release, we instructed him to try to use peaceful means to secure their release. Late in the night, he sent information indicating that he had succeeded to obtain the release of the twenty (20) students. We praised the Almighty God for having touched the hearts of the kidnappers and caused them to spare the lives of the students and the life of our Regional Secretary who was himself traumatized in the process. The kidnappers knew that we have stood and continue to stand for a peaceful approach to the solution to the crisis.”  Pictures of the released UB footballers suggest that they were tortured and wounded by their captors. | | | | | | | | | | | | | | | |  |
|  |  |
|  |  | | | | | | | | | | | | | | | |  |
|  | | | | | | | | | | | | 5 |  | CP |  | 12/4/2022 10:04 PM |  |
|  | It has been reported that at least two teachers and 12 students were kidnapped by gunmen at the campus of Presbyterian High School, PHS Kumba in the restive South West Region.  The SUN learnt from a source within the institution who opted for anonymity, that, lectures were halted for two weeks as gunmen, suspected to be separatist fighters demanded ransom to ensure the release of the teachers and students as well as the functioning of the institution.  “PHS Kumba is going through some difficult moments now; activities in the school has been suspended for close to two weeks now following the kidnapping of two teachers and some 12 students”, our sourced averred.  Our source further disclosed that the students were kidnapped in the quarters while on their way home after school.  Sources in the Mbonge Road and Mile One neighbourhoods disclosed that gunmen, suspected to be Amba fighters are reported to have moved to homes of teachers and school authorities to ask for money.  Meantime, The SUN gathered from some parents within the neighbourhood that the authorities of the school ordered the students who were left on campus to go home last week. The decision they say could have been forced by increased insecurity and persistent pressure from gunmen. Authorities of PHS Kumba are said to have told the students that they will notify them to come back when the situation has been normalised.  The unfortunate situation occurred weeks after there has been an increased number of students and classes have gained momentum after three frustrated academic years.  The demand for money as pre-condition for schools within the Kumba metropolis to function is said to be the new means suspected Amba fighters use to extort money from school authorities.  The Mbonge Road, Mile I neighbourhoods where PHS Kumba is located are among the most deserted vicinities in the Kumba metropolis since the Anglophone crisis took a bloody turn. | | | | | | | | | | | | | | | |  |
|  |  |
|  |  |
|  |  | | | | | | | | | | | | | | | |  |
|  | **Nodes\\Human Interest** | | | | | | | | | | | | | | | |  |
|  | | **Document** | | | | | | | | | | | | | | |  |
|  | | | **Internals\\237 online** | | | | | | | | | | | | | |  |
| No |  |  |  | 0.0034 |  | 3 | |  | | | | | |
|  | | |  |  |  |  |  |  |  | |  | | | | | | |
|  | | | | | | | | | | | | 1 |  | CP |  | 12/5/2022 2:17 AM |  |
|  | Les corps d’une femme enceinte et d’une jeune fille ont été découverts hier mercredi 26/06/2019 par des villageois en état de décomposition au lieu dit Small Ekombe, à Mbongue, en proie à un conflit sur fond de revendications séparatistes entre l’armée camerounaise et les terroristes séparatistes armées anglophone.  D’après les habitants de ce village, elles auraient été violées puis tuées. Le doigt accusateur est pointé par ces derniers sur sécessionnistes anglophone semant terreur et désolation dans cette | | | | | | | | | | | | | | | |  |
|  |  | | | | | | | | | | | | | | | |  |
|  | | | | | | | | | | | | | | | | | |
| Reports\\Coding Summary By Node Report | | | | | | | | | | Page 54 of 140 | | | | | | | |
| 1/21/2023 3:37 PM | | | | | | | | | | | | | | | | | |
|  | | | **Aggregate** |  | **Classification** |  | **Coverage** |  | **Number Of Coding References** | |  | **Reference Number** |  | **Coded By Initials** |  | **Modified On** |  |
|  | | | | | | | | | | | | | | | | | |
|  | | | | | | | | | | | | 2 |  | CP |  | 12/6/2022 12:38 AM |  |
|  | Ce fut une fête du travail plutôt sanglante à Likomba, dans le département du Fako, région du Sud-Ouest.  Nos sources nous informent qu’un homme de 26 ans, connu sous le surnom de gouvernor, a été tué ce 1er mai 2019 par des soldats Camerounais, pas loin de son domicile.  La victime désarmée a été abattue dans les environs de son domicile à Tiko. Cet assassinat aurait d’après nos sources mis en colère beaucoup de ses proches. Un monsieur sans histoire, connu de tous dans la région. | | | | | | | | | | | | | | | |  |
|  |  | | | | | | | | | | | | | | | |  |
|  | | | | | | | | | | | | 3 |  | CP |  | 12/6/2022 2:03 AM |  |
|  | Un groupe de personnes se présentant comme porte-parole des réfugiés camerounais installés au Nigeria ont écrit une lettre au HCR dans ce sens.  Ils ne veulent rien recevoir du gouvernement camerounais. C’est la quintessence du message contenu dans la correspondance signée par une dizaine de personnes. Se présentant comme porte-parole des quelques 21 réfugiés camerounais de la crise anglophone basés au Nigéria, ces derniers disent : « Nous n’accepterons aucune aide et ne voulons voir aucune visite de la part du gouvernement camerounais ».  Cette position radicale s’explique, disent-ils, par les actes posés par le gouvernement depuis le déclenchement de la crise dans les régions anglophones du Cameroun il y a près de deux ans : ils accusent le gouvernement d’être le principal responsable de la précarité dans laquelle ils vivent ; ils dénoncent la détention dans un lieu secret, du leader pro-indépendantiste Sisiku Ayuk Tabe et ses compagnons depuis 7 mois et ce, sans jugement. « Le problème des réfugiés et demandeurs d’asile camerounais au Nigeria n’est pas la nourriture », écrivent-ils.  Cette sortie fait suite à mise en œuvre d’un plan d’urgence humanitaire décidée par le Président de la République le 20 juin 2018. Evalué à 12,7 milliards de FCFA, cet argent proviendra du budget de l’Etat, des contributions des pays amis du Cameroun et des fonds collectés à la suite d’un appel à la générosité lancé par le gouvernement.  Cette aide humanitaire va servir : « à la protection des personnes déplacées; la fourniture des denrées alimentaires et des produits de première nécessité; les soins de santé; l’éducation; la reprise des activités économiques, notamment agricoles; le logement et la reconstitution des documents d’état-civil et des pièces administratives individuelles » | | | | | | | | | | | | | | | |  |
|  |  |
|  |  |
|  |  | | | | | | | | | | | | | | | |  |
|  | | | **Internals\\Bamenda Online articles** | | | | | | | | | | | | | |  |
| No |  |  |  | 0.0044 |  | 4 | |  | | | | | |
|  | | |  |  |  |  |  |  |  | |  | | | | | | |
|  | | | | | | | | | | | | 1 |  | CP |  | 12/8/2022 1:23 AM |  |
|  | The President of the Republic, H.E Paul Biya has compensated the victims of the March 14th fire incident at the Bamenda food market where a total of six lockup stores, 91 open stores (temporal stores) and 12 trading benches were ravaged by fire in a suspected arson. | | | | | | | | | | | | | | | |  |
|  |  | | | | | | | | | | | | | | | |  |
|  | | | | | | | | | | | | 2 |  | CP |  | 12/9/2022 12:00 AM |  |
|  | This new revelation  seems to indicate that the state has no case against them and is applying a dilatory tactics to drag the case for as long as possible, hoping to find a solution somewhere in between.  Mancho Bibixy, in this online video promises to spit venom whenever the courts would decide to question him. Speaking in Pidgin English he said he had known beforehand that he would be arrested because they have tried to do so unsuccessfully eight times before his arrest. | | | | | | | | | | | | | | | |  |
|  |  | | | | | | | | | | | | | | | |  |
|  | | | | | | | | | | | | 3 |  | CP |  | 12/9/2022 12:23 AM |  |
|  | It’s another busy day at the Bamenda  Food market ,  taxis, commercial motorbikes, traders and sellers alike try to navigate their way through a small part of the road left usable by a huge pile of smelly garbage. Most pedestrians are forced to  cover their noises in their hands as they try to find a way pass a huge heap of rotten mesh of cabbage, tomatoes, pears, water melon, orange,  celery, onions, leaks  and other fresh food items that has been left unattended for months by the garbage clearing company-Hysacam.  This is no longer an uncommon sight in Bamenda. Everywhere across the metropolis are abandoned mountains of domestic and at times industrial waste left to suffocate the air of the surrounding area with a pungent irritating smell, posing serious health threats to the population.  Not a single neighbourhood is left out. This has forced some nearby residents who could no | | | | | | | | | | | | | | | |  |
|  |  |
|  |  | | | | | | | | | | | | | | | |  |
|  | | | | | | | | | | | | 4 |  | CP |  | 12/9/2022 2:30 AM |  |
|  | The waste disposal management company, HYSACAM, has been grounded for 15 days with no way to carry on with waste disposal in Bamenda.  The main bridge leading to the dump site in Mbelewa- Mile Four Nkwen in Bamenda 3 subdivision was broken by unidentified gun men, trying to restrict the movement of cars into certain parts of Bafut thus rendering the dump site inaccessible to trucks of the company.  Nowadays, dirt is virtually littered around the city of Bamenda especially at road junctions and markets. The stench emanating from such waste materials is unbearable. At the Bamenda Food Market, portions of the road have been covered by stockpiled dirt.  HYSACAM’s | | | | | | | | | | | | | | | |  |
|  |  |
|  |  | | | | | | | | | | | | | | | |  |
| Reports\\Coding Summary By Node Report | | | | | | | | | | Page 55 of 140 | | | | | | | |
| 1/21/2023 3:37 PM | | | | | | | | | | | | | | | | | |
|  | | | **Aggregate** |  | **Classification** |  | **Coverage** |  | **Number Of Coding References** | |  | **Reference Number** |  | **Coded By Initials** |  | **Modified On** |  |
|  | | | **Internals\\Cameroon Tribune** | | | | | | | | | | | | | |  |
| No |  |  |  | 0.0138 |  | 11 | |  | | | | | |
|  | | |  |  |  |  |  |  |  | |  | | | | | | |
|  | | | | | | | | | | | | 1 |  | CP |  | 1/21/2023 12:57 AM |  |
|  | After the burning of the the Nkwen market, CENAJES Bamenda, some section of the Faculty of Health Science of the University of Bamenda just to name a few, the population woke up Tuesday March 14 to see the Food Market on flames. The fire that started around 2: 30 am ravaged a good portion of the market. According to the Government Delegate to the Bamenda City Council, Vincent Ndumu Nji about 10 lockup shops were completely ravaged by the fire and over 60 sheds were consumed. One of the victims Rose Sirri, told reporters that when she arrived the scene at about 3am she met her shop on flames. | | | | | | | | | | | | | | | |  |
|  |  | | | | | | | | | | | | | | | |  |
|  | | | | | | | | | | | | 2 |  | CP |  | 1/21/2023 1:14 AM |  |
|  | The incident caused the South West Chief Executive to go to Limbe. Though without loss of human life, at least 50 shops containing fowls, spices, palm oil, egusi, and much other food stuff have been razed to ashes in the night of Thursday breaking Friday (30-31 March) in the central Limbe Old Market. It was the second consecutive day Limbe was suffering from market arson as the neighbouring Limbe New Market had lost some four shops a night before to flames. The incident, as grievous as it was, caused the South West Governor, Bernard Okalia Bilai, to mobilise to the Limbe Market Friday afternoon especially as the suspect, through the help of the Limbe Council Vigilante group, had been caught and detained in the Limbe Central Police Station. Sources say the suspect was caught with fire-lighters and petrol at about 3 am Friday as he lit the last shops. The Limbe fire-fighting Brigade could only save the situation from escalating beyond the 50 shops burnt | | | | | | | | | | | | | | | |  |
|  |  |
|  |  | | | | | | | | | | | | | | | |  |
|  | | | | | | | | | | | | 3 |  | CP |  | 1/21/2023 1:42 AM |  |
|  | In a press conference organized in Douala on June 14, the ICRC authorities expressed the need to open their offices in the two affected regions. With the outbreak of violence in the two English speaking regions of Cameroon the International Committee of Red cross-ICRC has been present on the field to ensure that the humanitarian situation gets better. The ICRC delegation has been to both regions on several occasions to get first hand information on the situation so as to know how to ameliorate their intervention. After their visits to both regions, authorities of ICRC have decided to open regional offices in Bamenda and Buea so as to better intervene and help those affected. This was the principal message delivered in a press conference organized in Douala on the 14 of June 2019, during which the Assistant Regional Director for ICRC in Africa, Patrick Youssef, and the Head of Operation at Regional Delegation of ICRC for Central Africa Jérôme Fontana, both threw light on their activities in Cameroon. They said the movement has been to prison in the North West and South West regions and have visited prisons out of the regions to support those who were detained as a result of the ongoing crisis. For Mr Patrick Youssef, after their visits to both regions they realized that the humanitarian situation is degrading and the | | | | | | | | | | | | | | | |  |
|  |  |
|  |  | | | | | | | | | | | | | | | |  |
|  | | | | | | | | | | | | 4 |  | CP |  | 1/21/2023 2:09 AM |  |
|  | In a press conference in Yaounde on February 21, CAVAT appealed to countries and friends of Cameroon to apply their criminal and conspiracy laws to those perpetuating violence. The Cameroon Association of Victims of Ambazonia Terrorism (CAVAT) has called on countries and friends of Cameroon to apply their criminal, anti-terrorism and violence conspiracy laws to individuals of the selfproclaimed republic called ‘Ambazonia’ who are instigating violent acts in Cameroon. Led by Barrister Emmanuel Nsahlai who is lead Counsel of Victims of ‘Ambazonia’, members of the non-profit association granted a press conference in Yaounde on February 21, 2020 alongside some victims who have either suffered torture or kidnappings, calling on justice while praying for peace to return as soon as possible. According to CAVAT, individuals of the ghost ‘Ambazonia’ republic are in violation of a litany of laws and should countries hosting them apply their laws, the current quagmire rocking the North West and South West Regions will be adequately addressed, coupled with the efforts of government at ensuring a return to peace and | | | | | | | | | | | | | | | |  |
|  |  |
|  |  | | | | | | | | | | | | | | | |  |
|  | | | | | | | | | | | | 5 |  | CP |  | 1/21/2023 3:58 AM |  |
|  | Buea: Two Days Glooming Atmosphere Flags rest at half-mast while citizens went about their businesses dressed in black. From a distance, any person entering any public office in Buea last Friday, July 28, 2017 could easily tell that all was not well. First, all flags rested at half-mast while most workers were clothed in black. Before commencing work, most workers assembled in front of their offices and paid homage to the 34 soldiers who perished in a ship wreck in Debunsha near Limbe last July 16, 2017. Their prayers hinged on God to have compassion for the 34 souls and accommodate them in his bosom. As if to say the chariots of the gods on Mount Cameroon were equally in the mourning mood, the dull weather coupled with rain reinforced the glooming nature of the day. | | | | | | | | | | | | | | | |  |
|  |  | | | | | | | | | | | | | | | |  |
|  | | | | | | | | | | | | 6 |  | CP |  | 1/21/2023 4:08 AM |  |
|  | North West Governor, Adolphe Lele Lafrique advised returnees to contribute towards return to normalcy and avoid witch-hunting blame games. On the strength of President Paul Biya’s decision for the Military Tribunal in Yaounde to discontinue proceedings against some leaders arrested during the Anglophone crisis, Bamenda welcomed some of them back on September 1, 2017. The clocks stroke 8:45 am when some 38 of them arrived in the North West Governor’s office straight from Yaounde. It was an emotional moment for family members and friends who filed out to receive them as they emerged from the bus with North West Gendarmerie Legion Commander, Colonel. Nkoa Mala Valere ensuring superintendence | | | | | | | | | | | | | | | |  |
|  |  | | | | | | | | | | | | | | | |  |
| Reports\\Coding Summary By Node Report | | | | | | | | | | Page 56 of 140 | | | | | | | |
| 1/21/2023 3:37 PM | | | | | | | | | | | | | | | | | |
|  | | | **Aggregate** |  | **Classification** |  | **Coverage** |  | **Number Of Coding References** | |  | **Reference Number** |  | **Coded By Initials** |  | **Modified On** |  |
|  | | | | | | | | | | | | | | | | | |
|  | | | | | | | | | | | | 7 |  | CP |  | 1/21/2023 4:19 AM |  |
|  | Visiting Secretary of State in charge of the National Gendarmerie is in Bamenda to preside over the event. The last journey for some three military personnel recently killed in Jakiri and Bamenda begins today November 17, 2017 in Bamenda with military honours. In effect, the Secretary of State at the Ministry of Defense in charge of the National Gendarmerie is in Bamenda for the funeral event, conceived to standby the fallen gendarmes. They are, Gendarme- Major, Djonlay Bienvenu, killed on November 6, 2017 in Jakiri, Bui Division while searching for suspects who allegedly set ablaze GTHS Jakiri. Marechal- des Logis Chef, Hinma Rene, another Gendarme was killed on the night of November 7th, 2017 at about 11:30 pm at a Joint Check Point in Bafut, Mezam Division while Student Gendarme, Sali David was killed in the night of November 8th, 2017 in the neighbourhood of | | | | | | | | | | | | | | | |  |
|  |  |
|  |  | | | | | | | | | | | | | | | |  |
|  | | | | | | | | | | | | 8 |  | CP |  | 1/21/2023 4:32 AM |  |
|  | The 15 people captured by separatist fighters in Bessali, Lebialem Division reunited with their families during a ceremony in Kumba on October 15, 2020. Some 15 persons taken into captivity by separatist fighters in Bessali, Wabane Subdivision, Lebialem Division of the South West Region, liberated by elements of the Sixth Military Battalion of the Rapid Intervention Battalion, (B.I.R) in the South West Region have reunited with their families. A ceremony to that effect took place on Thursday, October 15, at the B.I.R Military Base in Mambanda, Kumba, presided over by the Senior Divisional Officer for Meme Sivision, Chamberlin Ntou'ou Ndong, in the presence of the Commander of the Sixth Military Battalion of the Rapid Intervention Battalion for the South West Region, Lieutenant Colonel Maidoang Desire. Speaking at the ceremony, an elated Senior Divisional Officer for Meme Division reassured the freed hostages that the government of Cameroon will continue to protect the lives and property of the population. He reiterated the Head of State, President Paul Biya’s call on the Separatist fighters to drop their arms and get to the Disarmament, Demobilisation and Reintegration (DDR) Centres in order to be reintegrated into the society, failure of which the consequences will be grave and weighty. While commending the efforts of Cameroon's military | | | | | | | | | | | | | | | |  |
|  |  |
|  |  | | | | | | | | | | | | | | | |  |
|  | | | | | | | | | | | | 9 |  | CP |  | 1/21/2023 4:33 AM |  |
|  | On the call of the Minister of Women’s Empowerment and the Family, the yesterday’s gathering was intended at denouncing the gruesome act which is a gross human right violation. Following the killing of school children at the Mother Francisca International Bilingual Academy complex in Kumba on October 24, 2020, women, government officials converged at the Yaounde City town hall and offered prayers of peace for the nation while denouncing the horrific and unbearable act of violence. On the call of the Minister of Women’s Empowerment and the Family, Marie Thérèse Abena Ondoa, the objective was to show sympathy with the affected families and call for an end to barbarism. In her declaration, Minister Abena Ondoa said the hideous attack which led to bloodshed and tears is a gross violation of human rights which need to be condemned today for tomorrow might be too late and other children may suffer same fate if silence is maintained. “Where did these children go wrong, what crime did they comment? These children were in the quest for learning, for knowledge, for education. These innocent | | | | | | | | | | | | | | | |  |
|  |  |
|  |  | | | | | | | | | | | | | | | |  |
|  | | | | | | | | | | | | 10 |  | CP |  | 1/21/2023 4:33 AM |  |
|  | En soutien aux victimes du massacre survenu le week-end dernier, elles se sont regroupées le 26 octobre dernier à Yaoundé, au Boulevard du 20 mai. L’horreur et la consternation suscitées par le massacre des élèves à Kumba, le week-end dernier, n’ont pas laissé indifférentes les femmes journalistes. Un collectif de cette corporation s’est joint le 26 octobre dernier à Yaoundé, aux femmes et filles du SudOuest rassemblées au Boulevard du 20 mai, lieu symbolique de la réunification du Cameroun, pour honorer la mémoire des victimes de cet assassinat. A leurs côtés au Boulevard, on pouvait reconnaître Rose Mbah Acha, ministre délégué à la présidence de la République chargée du Contrôle supérieur de l’Etat. Toutes de noir vêtues, la mine maussade, ces dames tenaient une banderole sur laquelle on pouvait lire : « Nous pleurons et demandons : qu’est-ce que nos enfants ont fait pour être tués ? » | | | | | | | | | | | | | | | |  |
|  |  |
|  |  | | | | | | | | | | | | | | | |  |
|  | | | | | | | | | | | | 11 |  | CP |  | 1/21/2023 4:34 AM |  |
|  | South West Women and children took to the streets demanding an end to the killings in the North West and South West Regions as they mourned school children murdered in Kumba. Wailing engulfed the town of Buea yesterday, October 28, 2020, as South West Women and children took to the streets mourning the mass execution of students in Kumba by separatists on October 24, 2020. Dressed in black attires and with peace plants in hands, they marched from Check Point in Molyko through Bongo Square, Buea Regional Hospital and to South West Governor’s Office. At the Buea Regional Hospital, they prayed for the speedy recovering of two of the Kumba carnage victims who are receiving treatment. Be it at Check Point, Bongo Square, Buea Regional Hospital or Esplanade of South West Governor Office, the women and children wailed uncontrollably that attacks on children and women should stop. They equally requested an end to the sociopolitical upheavals in the North West and South West Regions of Cameroon. In hand were signboards expressing their demands. “We want a Cameroon where children can go to school and come back alive”, “Stop the war”, “Stop the killings”, “Stop killing | | | | | | | | | | | | | | | |  |
|  |  |
|  |  | | | | | | | | | | | | | | | |  |
|  | | | | | | | | | | | | | | | | | |
|  | | | | | | | | | | | | | | | | | |
| Reports\\Coding Summary By Node Report | | | | | | | | | | Page 57 of 140 | | | | | | | |
| 1/21/2023 3:37 PM | | | | | | | | | | | | | | | | | |
|  | | | **Aggregate** |  | **Classification** |  | **Coverage** |  | **Number Of Coding References** | |  | **Reference Number** |  | **Coded By Initials** |  | **Modified On** |  |
|  | | | **Internals\\EcoMatin** | | | | | | | | | | | | | |  |
| No |  |  |  | 0.0071 |  | 1 | |  | | | | | |
|  | | |  |  |  |  |  |  |  | |  | | | | | | |
|  | | | | | | | | | | | | 1 |  | CP |  | 12/9/2022 11:55 PM |  |
|  | La scène digne d’un film d’horreur est tournée le samedi 24 octobre 2020 à « Mothere Francisca international Academy », un établissement scolaire situé au quartier Fiango, arrondissement de Kumba 2, dans le département de la Mémé, région du Sud-Ouest Cameroun. Le gouvernement camerounais parle d’un attentat terroriste, perpétré  par les groupes armés séparatistes qui sévissent dans les régions anglophones du pays. Selon sa version des faits, c’est aux alentours de 11 heures qu’un groupe composé d’une dizaine de « terroristes sécessionnistes » a fait irruption à bord de trois motocyclette, dans l’enceinte de l’établissement et a froidement ouvert le feu sur les élèves se trouvant dans les salles de classe. Le premier bilan fait état de 6 morts, tous des élèves âgés entre 9 et 12 ans dont 5 filles et un garçon.  Par ailleurs 13 élèves ont été blessés, soit 10 filles et 3 garçons, et dont 7 cas avérés préoccupants. Le porte-parole du Gouvernement révèle à cet effet que le président de la république a instruit la prise en charge des blessés, lesquelles ont | | | | | | | | | | | | | | | |  |
|  |  |
|  |  | | | | | | | | | | | | | | | |  |
|  | | | **Internals\\Eden Newspaper** | | | | | | | | | | | | | |  |
| No |  |  |  | 0.0033 |  | 2 | |  | | | | | |
|  | | |  |  |  |  |  |  |  | |  | | | | | | |
|  | | | | | | | | | | | | 1 |  | CP |  | 12/10/2022 11:55 PM |  |
|  | He questions whether there has been any thought about what the women and young girls in such particular areas may be going through. The countless situations of health hazards including poor feeding habits or complete starvation; usage of un-sterilized or infected items or bush leaves for their hygiene and reproductive health control issues; and brutality in the forms of sexual abuses, battering by not only rascals but some men in uniform as was the case in Bamenda on Monday 22 at a gas station. Those hiding in the bushes are battling with infectious bites from insects and even animals like snakes. | | | | | | | | | | | | | | | |  |
|  |  | | | | | | | | | | | | | | | |  |
|  | | | | | | | | | | | | 2 |  | CP |  | 12/11/2022 1:09 AM |  |
|  | Gaous was my schoolmate and childhood pal. He was not even involved in the strike, but was shot. I carried him on my shoulders for more than a kilometer before he died on the way to the hospital. It was a sad day for me. Life has never been the same again. This time, we must drive these barbarians from our country.” Said Elvis.  There was outright grief | | | | | | | | | | | | | | | |  |
|  |  | | | | | | | | | | | | | | | |  |
|  | | | **Internals\\La voix du centre** | | | | | | | | | | | | | |  |
| No |  |  |  | 0.0070 |  | 2 | |  | | | | | |
|  | | |  |  |  |  |  |  |  | |  | | | | | | |
|  | | | | | | | | | | | | 1 |  | CP |  | 12/11/2022 3:05 AM |  |
|  | La frustration et l’inconfiance au sujet d’une guerre sans espoir du moindre achèvement auraient  poussé un groupe d’hommes en tenue à prendre la poudre d’escampette. Dans la liste des déserteurs les éléments du corps des sapeurs-pompiers, les gendarmes et militaires outrés par les tueries quasi quotidiennes de leurs camarades dans les feux de cette guerre qui paralyse  les localités du Nord-ouest et du Sud-Ouest  depuis bientôt cinq ans sont introuvables. À l’honneur et fidélité ils ont opté pour le libre arbitre en désertant du service militaire. Portés disparus de tous les radars leurs noms circulent au sein du haut commandement.  Les signes d’un malaise profond  Même si la grande muette sert d’apologie du silence et de la réserve ses secrets bien que masqués par les étouffements débordent ses usages et exposent à la fin le vrai visage des tensions  en interne. La désertion des 226 éléments témoignent visiblement du mauvais vent qui souffle dans l’armée.  Les morts en masse des militaires au front dans le Noso, les handicapes | | | | | | | | | | | | | | | |  |
|  |  |
|  |  | | | | | | | | | | | | | | | |  |
|  | | | | | | | | | | | | 2 |  | CP |  | 12/11/2022 3:11 AM |  |
|  | La grande famille de la presse camerounaise en général et sa famille en particulier restent sans nouvelles de celle que ses confrères appelaient affectueusement la « combattante » à cause de son courage à ne reculer devant aucun obstacle et son goût prononcer de la recherche de la vérité.  Les faits remontent à septembre 2017 plus d’un an après le début de ce qu’on a qualifié ici de crise anglohone. Sa rédaction vient de la détacher pour suivre de près l’évolution de cette crise quand survient malheureusement une attaque de l’armée camerounaise contre une base cachée des sécessionnistes dissimulée dans un quartier de la ville de Buea. Dans leur fuite les ambazoniens comme ils se font appelés ici | | | | | | | | | | | | | | | |  |
|  |  | | | | | | | | | | | | | | | |  |
| Reports\\Coding Summary By Node Report | | | | | | | | | | Page 58 of 140 | | | | | | | |
| 1/21/2023 3:37 PM | | | | | | | | | | | | | | | | | |
|  | | | **Aggregate** |  | **Classification** |  | **Coverage** |  | **Number Of Coding References** | |  | **Reference Number** |  | **Coded By Initials** |  | **Modified On** |  |
|  | | | **Internals\\the post newspaper** | | | | | | | | | | | | | |  |
| No |  |  |  | 0.0026 |  | 1 | |  | | | | | |
|  | | |  |  |  |  |  |  |  | |  | | | | | | |
|  | | | | | | | | | | | | 1 |  | CP |  | 12/11/2022 11:13 PM |  |
|  | Some 100 Internally Displaced Persons, IDPs, have benefitted from psychological support through mindfulness, storytelling, poetry, motivational talks, video projection as well as question and answer sessions.  The exercise, organised in a bid to address the issue of mental trauma faced by young victims of the crisis took place on October 5 and 6 at the premises of the Hope and Rehabilitation Organisation, HaRO Cameroon, in Yaounde, as part of the project to transform their pain to purpose.  The keep fit was organised by Positive Youths Africa, PYA, in partnership | | | | | | | | | | | | | | | |  |
|  |  | | | | | | | | | | | | | | | |  |
|  | | | **Internals\\the sun newspaper** | | | | | | | | | | | | | |  |
| No |  |  |  | 0.0102 |  | 5 | |  | | | | | |
|  | | |  |  |  |  |  |  |  | |  | | | | | | |
|  | | | | | | | | | | | | 1 |  | CP |  | 12/3/2022 3:12 PM |  |
|  | The Member of Parliament for Bamenda/Bali constituency, Hon. Forbi Nchinda Simon cautioned the government not to force the General Certificate of Examination, GCE on students in the Northwest and Southwest regions who have not been to school since December 9, 2017.  He made the remark during a meeting chaired by the minister of Basic Education Jean Ernest Ngale Bibihe and attended by the registrar of the GCE Board, Humphrey Ekema Monono including other education stakeholders. | | | | | | | | | | | | | | | |  |
|  |  | | | | | | | | | | | | | | | |  |
|  | | | | | | | | | | | | 2 |  | CP |  | 12/3/2022 9:39 PM |  |
|  | Local observers question vote credibility, AU gives it a clean bill  In some places in Buea and Bamenda, polling stations had no single person coming to vote despite calls from the authorities asking residents to go out and exercise their civic duty. An observer for the Center for Research on Democracy and Development in Africa questioned the vote. “I feel so frightened even though I have lived in this conflict area since it started,” he said. Today’s confrontation, he adds, was not a good one. In some areas, the unnamed observer said that the military paraded all over the place on voting day, frightening voters. “If you are asking voters to come and vote – you don’t move around with guns threatening them. No one is going to vote because no one wants to die.” | | | | | | | | | | | | | | | |  |
|  |  | | | | | | | | | | | | | | | |  |
|  | | | | | | | | | | | | 3 |  | CP |  | 12/3/2022 11:32 PM |  |
|  | Lawyers of the Common Law extraction in the North West and South West regions of Cameroon on May 2, 2017, regain the courts thereby ending their almost seven month-long grounding of judicial proceedings in the two Anglophone regions of the country. The decision was arrived at following a conclave that held in Buea on Saturday, April 8, 2017, that brought together some 20 senior lawyers from the North West and South West.  The Buea conclave was organized by the president of the Bar Council, Me. Jackson Ngnie Kamga after two prior meetings he held with South West lawyers and North West lawyers in Buea and Bamenda respectively where lawyers expressed the need for a conclave of lawyers from both regions to arrive at a consensus decision regarding the future of the strike.  Batonnier Jackson Ngnie Kamnga  Speaking to Batonnier Jackson Ngnie Kamga on the sidelines of the Buea conclave, he revealed that for the past five months, the Bar Council has been working to look for solutions to the grievances presented by Anglophone lawyers relating to the erosion of the common law legal system. He said it was important that the Bar Council, made up of 50 members, to go to the field and talk with the parties concerned, reason why they held a meeting with lawyers in Buea and Bamenda to evaluate the situation and try to look for a way forward.  Ngnie Kamga revealed that, at the first meeting in Buea between the Bar Council and Southwest lawyers it was resolved that another meeting should be held with North West lawyers. The Bamenda meeting with North West lawyers also resolved and stressed the need for a conclave of lawyers from both regions, the Bar council president added, reason why a conclave was held in Bamenda two weeks ago followed by another conclave in Buea over the weekend which resulted to the decision for lawyers to resume work by May 2.  Batonnier Kamga announced that: “At the conclave in Buea made up of lawyers from the North West and South West regions, my colleagues have decided to resume work…they came to this decision because of what the government announced recently. My colleagues have acknowledged what they government has announced and have also decided to reciprocate with some measure of good faith.” | | | | | | | | | | | | | | | |  |
|  |  |
|  |  |
|  |  | | | | | | | | | | | | | | | |  |
|  | | | | | | | | | | | | 4 |  | CP |  | 12/4/2022 12:40 AM |  |
|  | T | | | | | | | | | | | | | | | |  |
|  |  | | | | | | | | | | | | | | | |  |
|  | | | | | | | | | | | | | | | | | |
| Reports\\Coding Summary By Node Report | | | | | | | | | | Page 59 of 140 | | | | | | | |
| 1/21/2023 3:37 PM | | | | | | | | | | | | | | | | | |
|  | | | **Aggregate** |  | **Classification** |  | **Coverage** |  | **Number Of Coding References** | |  | **Reference Number** |  | **Coded By Initials** |  | **Modified On** |  |
|  | | | | | | | | | | | | | | | | | |
|  | | | | | | | | | | | | 5 |  | CP |  | 12/4/2022 3:35 PM |  |
|  | The Kumba-Buea highway has finally been made accessible thanks to the intervention of the military, five days after armed separatist fighters mounted barricades and obstructed the movement of persons and goods.  The highway was made open on Wednesday June 20, after numerous gun battles between the military and the separatist fighters.  Some passengers who opted for anonymity revealed that they spent close to four hours from Ekona to Kumba trying to assist the military to open the blocked areas. They added that it took them over two hours to un-mount the blockages in Mbalangi, Mbonge Sub-Division.  The queue of over one hundred vehicles preceded the military as they made their way into Kumba.  Trucks belonging to companies were reported to have been set ablaze by separatist gunmen and used thereafter to block the road.  There are also reported cases of unidentified lifeless bodies still lying on the sides of the highway.  Talking to some drivers, they lamented on the dangers they have been exposed to as a result of the continuous deteriorating Anglophone crisis. They revealed that they have been working hitch free since the road became operational though with some obstruction of close to an hour as a result of exchange of gunshots.  Some however, complained on the increased number of control posts on the road. This they noted goes a long way to slow their movements.  It should be recalled that, during the afternoon hours of Friday June 15, the said separatist fighters mounted barricades at various points of the road including Mbalangi, Bombe, Banga, Malende in Fako Division.  Vehicles which had to make use of the road were forced to turn back when they came in contact with the first barricade. Others who tried to negotiate their way in were still unable to sail through the numerous barricades.  Some passengers from Buea who were caught up in the middle of scene disclosed that they were forced to complete their journey on foot. Some spent couple of nights on the way before they got to Kumba.  Meanwhile, vehicles heading to Buea and other towns immediately reversed to Kumba when they got information about the obstruction.  Parks played host to the thousands of passengers who remained stranded for days. Some who had urgent issues to handle out of Kumba were forced to travel through the Kumba-Mamfe road though with an increase in transport cost of close to FCFA 15,000.  The blockage equally hindered the supply of goods of basic needs and food items in Kumba, as business persons remained stranded in Buea with their goods. | | | | | | | | | | | | | | | |  |
|  |  |
|  |  |
|  |  |
|  |  | | | | | | | | | | | | | | | |  |
|  | **Nodes\\Lives Lost** | | | | | | | | | | | | | | | |  |
|  | | **Document** | | | | | | | | | | | | | | |  |
|  | | | **Internals\\237 online** | | | | | | | | | | | | | |  |
| No |  |  |  | 0.0250 |  | 20 | |  | | | | | |
|  | | |  |  |  |  |  |  |  | |  | | | | | | |
|  | | | | | | | | | | | | 1 |  | CP |  | 12/5/2022 12:56 AM |  |
|  | Les 3 vaillants éléments des forces de défense camerounaise ont rendu l’âme, au cours des échanges de coups de feu avec les séparatistes.  L’armée camerounaise en deuil. Celle-ci vient de perdre des éléments. Hier, jeudi 26 novembre 2020, trois hommes appartenant au 21ème bataillon des fusillés marins ont perdu leurs vies, après avoir succombé à leurs blessures respectives. Ces derniers ont été grièvement été blessés par balle dans une embuscade tendue par des séparatistes. Les faits se sont déroulés dans la commune d’Ekondo Titi (département du Ndian, région du Sud-Ouest). | | | | | | | | | | | | | | | |  |
|  |  | | | | | | | | | | | | | | | |  |
|  | | | | | | | | | | | | 2 |  | CP |  | 12/5/2022 1:01 AM |  |
|  | Le corps sans vie de la victime a été découvert le mardi 4 août 2020, sous le port du département de la Mezam.  Une découverte macabre mardi dernier dans la région du Nord-Ouest, et plus précisément sous le pont de la Mezam. Il s’agit du corps sans vie d’une adolescente qui se prénommait Trésor et qui menait une activité génératrice de revenus au marché centrale de Bamenda.  Dans une vidéo virale qui circule actuellement sur les réseaux sociaux, il est déplorable de constater que son cou est complètement tranché. | | | | | | | | | | | | | | | |  |
|  |  | | | | | | | | | | | | | | | |  |
|  | | | | | | | | | | | | 3 |  | CP |  | 12/5/2022 1:10 AM |  |
|  | Il s’appelait Ashu Prinsley Ojong. Il avait 35 ans seulement. C’était le nouveau maire de Mamfe, département de la Manyu dans la région du Sud-Ouest.  Il a été assassiné ce matin du dimanche, 10 mai 2020. Selon nos informations, appelé au téléphone par de présumés séparatistes qui l’invitaient à se rendre à Eshobi son village afin de les voir déposer les armes, le maire est plutôt tombé dans un guet apens. Il a été froidement abattu par les séparatistes, peu avant le pont de son village construit par la multinationale française Satom. | | | | | | | | | | | | | | | |  |
|  |  | | | | | | | | | | | | | | | |  |
| Reports\\Coding Summary By Node Report | | | | | | | | | | Page 60 of 140 | | | | | | | |
| 1/21/2023 3:37 PM | | | | | | | | | | | | | | | | | |
|  | | | **Aggregate** |  | **Classification** |  | **Coverage** |  | **Number Of Coding References** | |  | **Reference Number** |  | **Coded By Initials** |  | **Modified On** |  |
|  | | | | | | | | | | | | | | | | | |
|  | | | | | | | | | | | | 4 |  | CP |  | 12/5/2022 2:34 AM |  |
|  | Le décompte est fait par le Centre for Human Rights and Democracy in Africa dans un récent rapport.  Entre 2017 et 2019, 206 villages ont été brûlés dans les régions du Nord-ouest et du Sud-ouest du Cameroun. C’est ce que rapporte le Centre for Human Rights and Democracy in Africa (CHRDA), dans un rapport récemment rendu public.  Dans ce décompte, l’Ong rapporte que dans la région du Nord-ouest, 107 villages ont été réduits en cendres, pour 99 villages dans la région du Sud-ouest.  Dans ces chiffres, l’on note que 134 villages ont été « sévèrement affectés », autrement dit une destruction complète du village. 57 villages ont été partiellement affectés avec incendie de maison et destruction de bien ; et 15 ont connu des dommages encore moindres.  Depuis 2017, les régions anglophones se sont soulevées contre le pouvoir central dans ce qui s’est transformé en guerre civile entre militaires et indépendantistes armés. L’armée est régulièrement accusée de pratiquer la tactique de la terre brulée en incendiant des villages | | | | | | | | | | | | | | | |  |
|  |  |
|  |  | | | | | | | | | | | | | | | |  |
|  | | | | | | | | | | | | 5 |  | CP |  | 12/6/2022 12:38 AM |  |
|  | Ce fut une fête du travail plutôt sanglante à Likomba, dans le département du Fako, région du Sud-Ouest.  Nos sources nous informent qu’un homme de 26 ans, connu sous le surnom de gouvernor, a été tué ce 1er mai 2019 par des soldats Camerounais, pas loin de son domicile.  La victime désarmée a été abattue dans les environs de son domicile à Tiko. Cet assassinat aurait d’après nos sources mis en colère beaucoup de ses proches. Un monsieur sans histoire, connu de tous dans la région. | | | | | | | | | | | | | | | |  |
|  |  | | | | | | | | | | | | | | | |  |
|  | | | | | | | | | | | | 6 |  | CP |  | 12/6/2022 1:00 AM |  |
|  | Nous apprenons à l’instant que le Colonel YAOUBA Ousmanou, commandant du 3 ème bataillon amphibie du BIR à Limbe vient d’être abbatu à Kumbo par les Ambazoniens.  MISE AU POINT.  Une information selon laquelle un certain « Colonel Yaouba Ousmanou » apparatenant au 3eme Bataillon amphibie du BIR aurait été abattu par les sécessionnistes à hauteur de Kumbo, circule en ce moment. Nous démentons catégoriquement cette information qui fait le buzz dans l’infosphère, certainement dans le but inavoué de désinformer, distraire, ou véhiculer des informations de nature à saper moral de nos Forces, et à créer la psychose auprès des populations. L’unité en question n’existe que dans l’imaginaire élucubratif de son auteur, ainsi que cet officier inconnu de nos effectifs. C’est l’occasion de vous inviter à prendre toutes les précautions dans la gestion des informations liées à la sécurité.  Consultez nous au préalable. | | | | | | | | | | | | | | | |  |
|  |  |
|  |  | | | | | | | | | | | | | | | |  |
|  | | | | | | | | | | | | 7 |  | CP |  | 12/6/2022 1:03 AM |  |
|  | Les généraux Ojong Elvis Ojong et Obi ont été tués dimanche, au cours d’une opération militaire dans la ville de Mamfé, région du Nord-Ouest.  Les éléments du Bataillon d’intervention rapide (Bir) ont neutralisé deux leaders des factions armées ambazoniennes. Victor Obi A.k.a « général Ibo » a été tué lors d’un raïd mené par l’armée aux premières heures de la journée de dimanche. Ce jeune homme de 26 ans avait rejoint les forces de défenses de l’Ambazonie (Adf) après avoir fui l’arrivée des soldats à Kajifu (département du Manyu, région du Sud-Ouest) en décembre 2017.  Ojong Elvis Ojong, alias « General Eyong », un autre chef de guerre séparatiste, a été tué au cours de ces mêmes opérations.  Les concernés qui avaient trouvé refuge en divers lieux en brousse ont été surpris par les | | | | | | | | | | | | | | | |  |
|  |  |
|  |  | | | | | | | | | | | | | | | |  |
|  | | | | | | | | | | | | 8 |  | CP |  | 12/6/2022 1:25 AM |  |
|  | En communiquant ce chiffre hier à Yaoundé, Martin Mbarga Nguele a également annoncé les mesures prises pour sécuriser les élections présidentielles.  Depuis le déclenchement de la crise socio-politique en novembre 2016 dans les régions du Nord-Ouest et du Sud-Ouest, 18 fonctionnaires de police ont déjà trouvé la mort dans le cadre de cette crise. Ce chiffre a été communiqué hier par Martin Mbarga Nguele, le délégué général à la Sûreté nationale. Il présidait la cérémonie de promotion à titre exceptionnel et de remise des épaulettes et décorations à deux fonctionnaires de police.  Parlant des policiers ayant trouvé la mort, le délégué général à la Sureté nationale a déclaré : « Ces policiers ont été attaqués violemment assassinés parce qu’ils défendaient les institutions républicaines. L’information claire et nette. Leur esprit de sacrifice et leur héroïsme vont inspirer notre action dans le rétablissement de l’ordre public ». Le patron de la police a ensuite réitéré l’engagement de ses éléments à traquer les « fauteurs de trouble ».  Par la même occasion, le délégué général à la Sureté nationale a présenté les mesures spéciales prises par le président de la République pour que les élections présidentielles prévues en octobre prochain puissent se dérouler normalement dans les deux régions qui connaissent les défis sécuritaires. Dans son discours, Martin Mbarga Nguele a ajouté : « L’élection présidentielle survient dans un contexte relativement agité avec l’épicentre, les régions du Nord-Ouest et du Sud-Ouest, où des entrepreneurs du chaos, incendient aussi bien les édifices publics que privés, procèdent aux enlèvements, des prises d’otage et assassinent des innocents.  Ces partisans du désordre projettent de perturber les élections présidentielles prévues en octobre prochain. Face à tout cela, la police a le devoir de garantir le respect de la loi et de l’ordre public. Le chef de l’Etat a débloqué à cet effet, les moyens substantiels pour le renforcement des équipements de la police et l’acquisition des moyens de protection mieux adaptés à la mutation des défis actuels de sécurité intérieure. L’ouverture sur le Cameroun. Sous la houlette des autorités administratives et en collaboration avec les autres forces de défense et de sécurité, la police assumera pleinement ses missions dans le cadre de la sécurisation du processus électoral et dans le respect des lois de la République. Ainsi face aux entrepreneurs du chaos, la police fera prévaloir la force du droit.  Face à la barbarie et au terrorisme, la police opposera la légitime défense et défendra la République et l’Etat de droit. Face au désordre et aux violences de toute sorte, elle constituera un rempart implacables », a déclaré le délégué général à la Sureté nationale. | | | | | | | | | | | | | | | |  |
|  |  |
|  |  |
|  |  |
|  |  | | | | | | | | | | | | | | | |  |
| Reports\\Coding Summary By Node Report | | | | | | | | | | Page 61 of 140 | | | | | | | |
| 1/21/2023 3:37 PM | | | | | | | | | | | | | | | | | |
|  | | | **Aggregate** |  | **Classification** |  | **Coverage** |  | **Number Of Coding References** | |  | **Reference Number** |  | **Coded By Initials** |  | **Modified On** |  |
|  | | | | | | | | | | | | | | | | | |
|  | | | | | | | | | | | | 9 |  | CP |  | 12/6/2022 1:56 AM |  |
|  | Le corps a été découvert jeudi matin dans un état de décomposition près de sa voiture.  Un gendarme à la retraite a été pris pour cible par des hommes se réclamant sécessionnistes. Il a été enlevé mardi soir, puis abattu à l’entrée du village de Guzang, non loin de Batibo, dans la région du Nord-Ouest.  Des sources affirment qu’il a été brûlé à côté de sa voiture par des présumés combattants séparatistes, qui le soupçonnaient d’être en complicité avec les forces de sécurité. Ils étaient persuadés que ce gendarme à la retraite aidait les militaires à les traquer dans cette partie du pays.  Il était accusé d’avoir laissé sa voiture à la disposition des éléments des forces de défenses camerounaise pour leurs opérations dans la région. | | | | | | | | | | | | | | | |  |
|  |  |
|  |  | | | | | | | | | | | | | | | |  |
|  | | | | | | | | | | | | 10 |  | CP |  | 12/6/2022 1:56 AM |  |
|  | Les circonstances de leur décès sont encore inconnues.  Des cadavres de trois jeunes hommes ont été découverts ce jeudi à Wum, localité située dans la région du Nord-Ouest du Cameroun. Ils n’ont pas été identifiés et les circonstances de leur mort ne sont pas connues pour l’instant.  Mais, cette ville est particulièrement la cible de violences depuis quelques semaines. Un magistrat a été kidnappé le mardi 21 août. Il se trouvait à bord d’un véhicule de transport en commun. L’on n’a pas de récentes nouvelles de Tahle Mukete, qui cumulait des fonctions de président du Tribunal de grande instance et de première instance de Wum.  Le 24 août dernier, deux gendarmes ont été tués au cours d’une attaque menée à Zhoa, village situé près de Wum, dans le poste de gendarmerie. | | | | | | | | | | | | | | | |  |
|  |  |
|  |  | | | | | | | | | | | | | | | |  |
|  | | | | | | | | | | | | 11 |  | CP |  | 12/6/2022 1:59 AM |  |
|  | Mort en captivité, la dépouille de Sa Majesté Mbanda a été remise à sa famille au moment où les « Ambazoniens » libéraient six autres chefs pris en otage.  L’ultimatum donné par le maire de Buea, Patrick Ekéma, le 30 juillet dernier aux sécessionnistes, a porté ses fruits. Au sortir de la conférence donnée par les fils et filles Bakwéri du Sud-Ouest en début de semaine, l’édile donnait 24h aux « Ambazoniens » pour libérer les chefs traditionnels enlevés. D’autant plus que d’après Patrick Ekéma, la rumeur du décès d’un de ces gardiens de la tradition s’était déjà répandue dans la ville. L’on s’y attendait le moins, lorsque dans la nuit de lundi à mardi dernier, cinq chefs ont été remis en liberté.  La sixième autorité traditionnelle respirera l’air de la liberté le lendemain mardi, aux environs de midi. Reste que la dépouille de Chief Mbanda, chef de Lysoka qui a succombé aux « actes de torture » de la part des sécessionnistes pendant sa détention, a également été remise à sa famille. « La famille a reçu un coup de fil lui indiquant où est-ce qu’elle devait trouver le corps du chef », apprend-on. L’ouverture sur le Cameroun. Pour l’heure, rien ne filtre sur le lieu où ces chefs ont été accueillis. L’on sait tout au moins qu’après plus de deux semaines de captivité, tous les chefs ont finalement été libérés avant la marche organisée hier 31 juillet, sur la principale artère de la ville de Buea par le maire de la ville. Un mouvement lancé à 12h, après deux heures de retard. Ceci, en raison du mot d’ordre de l’opération «  villes-mortes » instauré par des « Ambazoniens ».  Les populations de Buea ont donc eu du mal à quitter leurs maisons pour descendre dans la rue, et marcher contre les sécessionnistes. Au cours de la conférence donnée lundi dernier par Patrick Ekéma et les ressortissants Bakwéri, l’édile a appelé les habitants de sa ville à tenir tête aux sécessionnistes.  « Ce sont des maquisards. C’est pour leur dire qu’ils n’ont pas de talisman. Parce que s’ils l’avaient, ils seraient allés prendre la présidence. Chaque fois qu’ils voient les militaires, pourquoi fuient-ils ? », s’indigne le maire de Buea | | | | | | | | | | | | | | | |  |
|  |  |
|  |  |
|  |  | | | | | | | | | | | | | | | |  |
|  | | | | | | | | | | | | 12 |  | CP |  | 12/6/2022 2:00 AM |  |
|  | Un policier a été décapité mercredi dans une localité de la région camerounaise du Nord-Ouest anglophone, où les meurtres de membres des forces camerounaises sont régulièrement imputés aux combattants séparatistes, a-t-on appris de sources concordantes.  Un policier en poste à Wum (Nord-Ouest) « a été tué« , a déclaré à l’AFP une source sécuritaire, confirmant une information d’un proche de la victime.  Le policier se trouvait à barrage routier, en compagnie d’un collègue, lorsque des hommes soupçonnés d’être des sécessionnistes l’ont attaqué, selon la source sécuritaire.  « Ils ont coupé sa tête et l’ont emportée« , a-t-elle précisé.  La sécurité dans les régions du Nord-Ouest et du Sud-Ouest anglophones s’est considérablement dégradée. Les combats y sont devenus quotidiens entre les forces de sécurité et des séparatistes armés réclamant la création d’un Etat anglophone indépendant.  Plus de 80 policiers et militaires y ont été tués depuis le début de la crise, fin 2016.  Ce conflit armé de plus en plus violent, ainsi que celui contre le groupe jihadiste Boko Haram dans le nord du pays, pourraient perturber le scrutin présidentiel prévu le 7 octobre, selon les analystes.  Le président Paul Biya, 85 ans dont 35 au pouvoir, s’est déclaré candidat la semaine dernière à un septième mandat consécutif.  Ses partisans estiment qu’il est le mieux à même de répondre à la crise anglophone, ses opposants l’accusant d’en être responsable. | | | | | | | | | | | | | | | |  |
|  |  |
|  |  |
|  |  | | | | | | | | | | | | | | | |  |
|  | | | | | | | | | | | | 13 |  | CP |  | 12/6/2022 2:04 AM |  |
|  | Pris dans une embuscade de week-end, des gendarmes ont échangé des tirs avec des séparatistes ; ils ont éliminé quelque 6 d’entre eux en perdant un des leurs.  L’une des 07 victimes de ces altercations est un gendarme qui officiait dans la patrouille opérationnelle. Son corps sans vie a été retrouvé dans les maquis, à coté de 6 autres, par ses collègues en mission de soutien. Comme l’a rapporté le Col. Didier BADJECK, communicant du Ministère de la défense, ce soldat était d’une escorte d’éléments de la gendarmerie d’Andek cheminant avec quelques-uns du Bataillon troupes aéroportées (BTAP) de Koutaba à bord d’un Pick-up qui ont été surpris par un guet-apens est tombée des sécessionnistes à Tuguy, près de Mbengwi dans le département de la Momo. Outre l’unique mort enregistré chez les soldats, cinq | | | | | | | | | | | | | | | |  |
|  |  |
|  |  | | | | | | | | | | | | | | | |  |
| Reports\\Coding Summary By Node Report | | | | | | | | | | Page 62 of 140 | | | | | | | |
| 1/21/2023 3:37 PM | | | | | | | | | | | | | | | | | |
|  | | | **Aggregate** |  | **Classification** |  | **Coverage** |  | **Number Of Coding References** | |  | **Reference Number** |  | **Coded By Initials** |  | **Modified On** |  |
|  | | | | | | | | | | | | | | | | | |
|  | | | | | | | | | | | | 14 |  | CP |  | 12/6/2022 11:47 PM |  |
|  | La police camerounaise est dans la tristesse depuis hier suite à cause de l’assassinat de l’officier de police ABOUBAKAR, commissaire de la localité de Oshe située dans la région le Nord-Ouest, tué hier par des hommes armés – certainement des séparatistes.  Il était également chef du village Karna-Manga, village situé dans la commune de Mbe, région de l’Adamaoua, département de la Vina.  Rappelons qu’en dehors des civils, c’est le énième homme en tenue qui péri dans la guerre en zone anglophone entre temps on célèbrera la 46 ème édition de la fête nationale du Cameroun dimanche prochain sous le thème de : << Citoyens camerounais, restons unis dans la diversité et préservons la paix sociale, pour un Cameroun stable, indivisible et prospère ». | | | | | | | | | | | | | | | |  |
|  |  | | | | | | | | | | | | | | | |  |
|  | | | | | | | | | | | | 15 |  | CP |  | 12/6/2022 11:49 PM |  |
|  | La victime et sa compagne avaient été kidnappées le 08 mai au village Golo, dans la commune d’Ekondo-Titi.  Leurs dépouilles ont été retrouvées deux jours plus tard dans une autre localité.  Le défunt s’appelait Takang Elvis Ayuke. Il avait rejoint le corps de la Gendarmerie nationale en 2013 et était en service au peloton 812 à Ekondo-Titi (département du Ndian). Sa dépouille a été retrouvée en cours de putréfaction dans la localité de Lipenja, deux jours après son kidnapping à Golo.  Tout commence le 08 mai. Le gendarme Takang Elvis Ayuke se rend à Kumba pour toucher son argent. Il est accompagné de sa petite amie (une jeune femme originaire de la région de l’Est, apprend-on). En cours de route, ils sont attaqués par des individus armés qui les conduisent vers une destination inconnue.  Des battues sont organisées pour retrouver ces deux personnes dans un contexte marqué par la violence à Ekondo-Titi. Les corps sont retrouvés le 10 mai. Celui de la jeune fille avait déjà été enterré tandis que celui-du soldat gisait en pleine brousse.  Une équipe composée de certains éléments du Bataillon des fusiliers marins (Bafumar) et des gendarmes est dépêchée pour aller déposer les corps à la morgue. En cours de route, non loin du village Konye, ils subissent aussi une attaque. Deux blessés sont enregistrés parmi les forces de défense et de sécurité. | | | | | | | | | | | | | | | |  |
|  |  |
|  |  | | | | | | | | | | | | | | | |  |
|  | | | | | | | | | | | | 16 |  | CP |  | 12/6/2022 11:55 PM |  |
|  | Le porte-parole de l’Ambazonie, Chris Anu, relève que cet haut commis de l’Etat a été assassiné dernièrement par Ayaba Cho.  Dans une déclaration publiée dans les premières heures de ce Mercredi 4 avril 2018, Chris Anu annonce avec consternation l’assassinat du délégué régional des Affaires Sociales pour le Nord-Ouest par Cho Ayaba, l’un des leaders du mouvement séparatiste anglophone.  «Animboum Aaron Akiabom, délégué des Affaires Sociales à Bamenda, un pasteur de longue date / Diacre de l’Eglise Baptiste avait été enlevé à Batibo alors qu’il rentrait des funérailles. Cho Ayaba avait revendiqué ce rapt à travers une vidéo publiée le 10 mars sur des réseaux sociaux, Je viens d’apprendre qu’il a été exécuté», annonce Chris Anu qui se demande pourquoi un tel acte vicieux. D’après le porte-parole de l’Ambazonie, la révolution en cours n’a pas pour objectif d’exécuter ses victimes mais de pourchasser ceux qui les ont transformé en victimes.  Dans une vidéo postée le 10 mars 2018 dans les réseaux sociaux, le délégué Animbom Aaron avait déclaré avoir été enlevé par des éléments de l’Ambazonia Defense Force (ADF), la branche armée du mouvement du sécessionniste. Les ravisseurs donnaient 48h au Gouvernement pour qu’il donne signe de vie de leurs leaders de l’Ambazonie arrêtés aux Nigéria et extradés au Cameroun en janvier 2018. Passé ce délai, Animbom Aron allait être exécuté selon ses propres déclarations sur l’enregistrement.  Le samedi 24 février 2018 que le délégué régional des Affaires Sociales pour le Nord-Ouest, Animbom Aaron Ankiambom, avait été kidnappé dans la localité de Batibo. Il revenait du village Ashong, où il avait pris part à des obsèques, lorsque sa | | | | | | | | | | | | | | | |  |
|  |  |
|  |  | | | | | | | | | | | | | | | |  |
|  | | | | | | | | | | | | 17 |  | CP |  | 12/7/2022 12:20 AM |  |
|  | Les concernés ont trouvé la mort dimanche, au cours d’une attaque du poste de gendarmerie. Quatre autres gendarmes ont été blessés.  Deux élèves gendarmes ont péri dimanche, 11 mars, dans un assaut contre le poste de gendarmerie de Songwa (région du Nord-Ouest). Ceux-ci étaient sortis du poste pour les toilettes lorsqu’ils ont été attaqués par des individus armés.  Les autres gendarmes – dont le chef de poste – présents sur les lieux sont restés cloitrés dans le poste en attendant le renfort qui est arrivé quelques heures plus tard. Les sécessionnistes avaient, cependant, déjà eu le temps de fuir.  Les forces de sécurité ont également enregistré quatre blessés et perdu deux armes de guerres de marque Fal et AK47. | | | | | | | | | | | | | | | |  |
|  |  | | | | | | | | | | | | | | | |  |
|  | | | | | | | | | | | | 18 |  | CP |  | 12/7/2022 12:34 AM |  |
|  | Son œil a été crevé et son arme emportée par ses agresseurs ce dimanche 18 Fevrier 2018. Le poste de contrôle de Nguti situé sur l’axe Mamfe – Kumba dans la région du Sud-Ouest a été attaqué le dimanche 18 février 2018 par des hommes armés non-identifiés selon des sources auprès de la légion de gendarmerie du Sud-Ouest.  Ces sources rapportent que l’élève gendarme Degoume Jean-Claude a été assassiné lors de l’attaque, « son œil crevé et son arme emportée ». D’après la gendarmerie, cette attaque qui a eu lieu vers 15 heures a fortement perturbé la circulation ce dimanche sur l’axe routier entre Bamenda | | | | | | | | | | | | | | | |  |
|  |  | | | | | | | | | | | | | | | |  |
|  | | | | | | | | | | | | 19 |  | CP |  | 12/7/2022 12:37 AM |  |
|  | Deux éléments de nos forces de défense dont le maréchal des logis Souzock Mvondo larissa ont été froidement assassinés jeudi dernier dans la région du Nord-ouest.  Leurs présumés assassins ont été arretés.  Cet assassinat a ému l’opinion nationale et internationale poussant à de multiples interrogations sur la fin de la crise qui perdure dans les deux régions anglophones du Cameroun. Deux gendarmes ont succombé à leurs blessures jeudi dernier après une attaque dans le Nord-ouest. Acte attribué aux séparatistes dont les membres venaient d’être extradés au Cameroun. Ils ont été abattus dans un « check-point » dans la localité de Bingo où ils étaient en fonction. Aux dernières nouvelles, deux individus considérés comme étant les présumés assassins viennent d’être | | | | | | | | | | | | | | | |  |
|  |  |
|  |  | | | | | | | | | | | | | | | |  |
| Reports\\Coding Summary By Node Report | | | | | | | | | | Page 63 of 140 | | | | | | | |
| 1/21/2023 3:37 PM | | | | | | | | | | | | | | | | | |
|  | | | **Aggregate** |  | **Classification** |  | **Coverage** |  | **Number Of Coding References** | |  | **Reference Number** |  | **Coded By Initials** |  | **Modified On** |  |
|  | | | | | | | | | | | | | | | | | |
|  | | | | | | | | | | | | 20 |  | CP |  | 12/7/2022 1:03 AM |  |
|  | Au Cameroun, depuis bientôt trois ans, une guerre a éclaté loin des regards extérieurs.  Tenues à l’écart des médias, les deux régions anglophones du Nord-Ouest et Sud-ouest ont basculé dans un conflit d’où n’émergent sur les réseaux sociaux que quelques rares et horribles images d’exactions.  Entre les groupes armés qui combattent pour l’indépendance de ces deux régions et les forces armées camerounaises, les civils paient le prix fort. D’après les Nations unies, 4 millions de personnes sont affectées par le conflit.  Plus d’un demi-million de personnes ont été déplacées, près de 2 000 tuées. Les enlèvements sont devenus un commerce en pleine expansion alors que l’économie de la région s’effondre.  En dehors du climat délétère dans les régions du Nord-Ouest et du Sud-ouest, une autre crise sociopolitique est née à la suite de la présidentielle du 07 octobre 2018 avec l’arrestation des leaders du Mouvement pour la Renaissance du Cameroun arrivé deuxième selon les résultats rendus publics par le Conseil constitutionnel. | | | | | | | | | | | | | | | |  |
|  |  |
|  |  | | | | | | | | | | | | | | | |  |
|  | | | **Internals\\Bamenda Online articles** | | | | | | | | | | | | | |  |
| No |  |  |  | 0.0015 |  | 2 | |  | | | | | |
|  | | |  |  |  |  |  |  |  | |  | | | | | | |
|  | | | | | | | | | | | | 1 |  | CP |  | 12/12/2022 1:00 AM |  |
|  | Several persons have been killed, properties torch, hundred  arrested and detained, tortured, others kidnapped, intimidated while other have been forced to flee into exile since the Anglophone crisis erupted in October 2016.  There have also been reports of families not seeing their loves ones since October 1st. | | | | | | | | | | | | | | | |  |
|  |  | | | | | | | | | | | | | | | |  |
|  | | | | | | | | | | | | 2 |  | CP |  | 12/8/2022 1:43 AM |  |
|  | The Killing of two gendarme officers in Bamenda in the wee hours of Wednesday has been claimed by the Ambazonian Defense Forces –ADF according to a report by the Reuters News Agency.  The report states “Cho Ayaba, a leading member of the Ambazonian Governing Council, a separatist body established to create an independent state called Ambazonia, said secessionist militants killed three gendarmes in two coordinated attacks in Bamenda, the capital of the predominantly English-speaking Northwest region” | | | | | | | | | | | | | | | |  |
|  |  | | | | | | | | | | | | | | | |  |
|  | | | **Internals\\Cameroon Tribune** | | | | | | | | | | | | | |  |
| No |  |  |  | 0.0082 |  | 6 | |  | | | | | |
|  | | |  |  |  |  |  |  |  | |  | | | | | | |
|  | | | | | | | | | | | | 1 |  | CP |  | 1/21/2023 2:05 AM |  |
|  | Femmes assassinées dans le Nord-Ouest et le Sud-Ouest : afin que nul n’oublie Après sa sortie la semaine dernière à Yaoundé pour dénoncer ces crimes, c’est par une offre symbolique que le Minproff a célébré hier la mémoire des victimes. Une page entière et en couleur du quotidien national bilingue Cameroon Tribune. En fait de couleurs, il s’agit, en fond, d’un ciel bleu clairsemé de nuages blancs. Y ont été apposées les portraits de Florence Ayafor, Achiri Comfort Tumassang, Mbah Treasure, devenues à leurs corps défendant les visages de la barbarie humaine dans les régions du Nord-Ouest et du Sud-Ouest. Une longue liste, du reste non exhaustive, d’autres femmes tombées sous les coups des séparatistes anglophones et trois colombes, certainement porteuses d’espoir pour une sortie définitive de ce conflit, complètent le tableau rogné du vert-rouge-jaune national. C’est la manière du ministre de la Promotion de la Femme | | | | | | | | | | | | | | | |  |
|  |  |
|  |  | | | | | | | | | | | | | | | |  |
|  | | | | | | | | | | | | 2 |  | CP |  | 1/21/2023 4:20 AM |  |
|  | Below is an introductory statement from the Minister of Communication. “In the night between November 28 and 29, 2017, some heavily armed terrorists attacked the elements of our Defence and Security Forces dispatched within the framework of an assignment to protect the territorial integrity of our country in the Agborkem German locality, in the Manyu Division, South-West Region. Four servicemen of the 22nd Motorized Infantry Batallion of our army were coldly assassinated during this attack. They are Staff Sergeant TIH Julius Angu, Lance Corporal VOULA VOULA Victor, Private Second Class YINDA BOBEKREO and Private Second Class NOUTCHOMWO MANY Raphael Willy. The assailants, who claimed to belong to the armed wing of the secessionist movement called “Southern Cameroons Ambazonia Consortium United Front” (SCACUF) probably came on canoes, making their way through the particularly intense fluvial traffic in this area, due to the strong presence of fishermen and traders. The President of the Republic, His Excellency Paul BIYA, Head of State, Commander-in-Chief of the Army, pays a vibrant homage to the memory of these valiant servicemen who fell in the battlefield while on duty to defend our dear fatherland. To our Defense and Security Forces, the | | | | | | | | | | | | | | | |  |
|  |  |
|  |  | | | | | | | | | | | | | | | |  |
[truncated: 497,641 more chars]
