# Supplementary material
Source: Research Square preprint supplement (doi:10.21203/rs.3.rs-8545290/v1)
Supplement: Supplementary file 7 [file 9079fe24066f98bfa1d998b1.docx]

| 1/21/2023 3:47 PM | | | | | | | |
| --- | --- | --- | --- | --- | --- | --- | --- |
| Project Summary | | | | | | | |
| PHD Thesis Coding | | | | | | | |
| 1/21/2023 3:47 PM | | | | | | | |
| **Hierarchical Name** | | **Item Type** | **Created By Username** | | **Created On** | **Modified By Username** | **Modified On** |
| **C:\Users\W7\Desktop\THESIS** | | | | | | | |
|  | | | | | | | |
| **Created By:** | **Coding Data** | | | | | | |
| **Created On:** |
| **Last Modified By:** |
|
| **Externals** | | | | | | | |
|  | |  |  | |  |  |  |
|  | | | | | | | |
| **Extracts** | | | | | | | |
| Extracts\\Coding Summary By Node Extract | | Extract | Crys Projects | | 12/1/2022 3:30 AM | Crys Projects | 12/1/2022 3:30 AM |
| Extracts\\Coding Summary By Source Extract | | Extract | Crys Projects | | 12/1/2022 3:30 AM | Crys Projects | 12/1/2022 3:30 AM |
| Extracts\\Node Classification Summary Extract | | Extract | Crys Projects | | 12/1/2022 3:30 AM | Crys Projects | 12/1/2022 3:30 AM |
| Extracts\\Node Structure Extract | | Extract | Crys Projects | | 12/1/2022 3:30 AM | Crys Projects | 12/1/2022 3:30 AM |
| Extracts\\Node Summary Extract | | Extract | Crys Projects | | 12/1/2022 3:30 AM | Crys Projects | 12/1/2022 3:30 AM |
| Extracts\\Project Summary Extract | | Extract | Crys Projects | | 12/1/2022 3:30 AM | Crys Projects | 12/1/2022 3:30 AM |
| Extracts\\Source Classification Summary Extract | | Extract | Crys Projects | | 12/1/2022 3:30 AM | Crys Projects | 12/1/2022 3:30 AM |
| Extracts\\Source Summary Extract | | Extract | Crys Projects | | 12/1/2022 3:30 AM | Crys Projects | 12/1/2022 3:30 AM |
|  | | | | | | | |
| **Framework Matrices** | | | | | | | |
|  | |  |  | |  |  |  |
|  | | | | | | | |
| **Internals** | | | | | | | |
| Internals\\237 online | | Document | Crys Projects | | 12/1/2022 4:29 AM | Crys Projects | 12/7/2022 1:04 AM |
| Internals\\Bamenda Online articles | | Document | Crys Projects | | 12/7/2022 11:25 PM | Crys Projects | 12/12/2022 1:02 AM |
| Internals\\Cameroon Tribune | | Document | Crys Projects | | 1/21/2023 12:54 AM | Crys Projects | 1/21/2023 4:37 AM |
| Internals\\EcoMatin | | Document | Crys Projects | | 12/1/2022 3:31 AM | Crys Projects | 12/10/2022 12:37 AM |
| Internals\\Eden Newspaper | | Document | Crys Projects | | 12/7/2022 11:25 PM | Crys Projects | 12/11/2022 1:20 AM |
| Internals\\La voix du centre | | Document | Crys Projects | | 12/1/2022 3:31 AM | Crys Projects | 12/12/2022 12:15 AM |
|  | | | | | | | |
| Reports\\Project Summary Report | | | | Page 1 of 3 | | | |
| 1/21/2023 3:47 PM | | | | | | | |
| **Hierarchical Name** | | **Item Type** | **Created By Username** | | **Created On** | **Modified By Username** | **Modified On** |
| Internals\\the post newspaper | | Document | Crys Projects | | 12/1/2022 3:31 AM | Crys Projects | 12/12/2022 12:15 AM |
| Internals\\the sun newspaper | | Document | Crys Projects | | 12/1/2022 3:31 AM | Crys Projects | 12/12/2022 1:43 AM |
|  | | | | | | | |
| **Memos** | | | | | | | |
|  | |  |  | |  |  |  |
|  | | | | | | | |
| **Models** | | | | | | | |
|  | |  |  | |  |  |  |
|  | | | | | | | |
| **Node Classifications** | | | | | | | |
|  | |  |  | |  |  |  |
|  | | | | | | | |
| **Node Matrices** | | | | | | | |
|  | |  |  | |  |  |  |
|  | | | | | | | |
| **Nodes** | | | | | | | |
| Nodes\\Conflict | | Node | Crys Projects | | 12/3/2022 4:51 PM | Crys Projects | 1/21/2023 4:36 AM |
| Nodes\\Economic Consequence | | Node | Crys Projects | | 12/3/2022 4:49 PM | Crys Projects | 1/21/2023 4:28 AM |
| Nodes\\Effects | | Node | Crys Projects | | 12/1/2022 4:36 AM | Crys Projects | 1/21/2023 4:18 AM |
| Nodes\\Financial Support | | Node | Crys Project | | 12/4/2022 12:03 AM | Crys Projects | 1/21/2023 4:29 AM |
| Nodes\\Hostage | | Node | Crys Projects | | 12/4/2022 7:08 PM | Crys Projects | 1/21/2023 3:45 AM |
| Nodes\\Human Interest | | Node | Crys Projects | | 12/3/2022 3:12 PM | Crys Projects | 1/21/2023 4:34 AM |
| Nodes\\Lives Lost | | Node | Crys Projects | | 12/3/2022 4:24 PM | Crys Projects | 1/21/2023 4:34 AM |
| Nodes\\Peace and Unity | | Node | Crys Projects | | 12/3/2022 4:22 PM | Crys Projects | 1/21/2023 4:35 AM |
| Nodes\\Protest | | Node | Crys Project | | 12/3/2022 11:15 PM | Crys Projects | 1/21/2023 3:56 AM |
| Nodes\\Responsibility | | Node | Crys Projects | | 12/3/2022 3:15 PM | Crys Projects | 1/21/2023 4:24 AM |
| Nodes\\Security and Defense | | Node | Crys Projects | | 12/3/2022 5:08 PM | Crys Projects | 1/21/2023 4:34 AM |
| Nodes\\Violence | | Node | Crys Projects | | 12/1/2022 4:34 AM | Crys Projects | 1/21/2023 4:36 AM |
|  | | | | | | | |
| **Queries** | | | | | | | |
|  | |  |  | |  |  |  |
|  | | | | | | | |
| **Relationship Types** | | | | | | | |
| Relationship Types\\Associated | | Relationship Type | Crys Projects | | 12/1/2022 3:30 AM | Crys Projects | 12/1/2022 3:30 AM |
|  | | | | | | | |
| Reports\\Project Summary Report | | | | Page 2 of 3 | | | |
| 1/21/2023 3:47 PM | | | | | | | |
| **Hierarchical Name** | | **Item Type** | **Created By Username** | | **Created On** | **Modified By Username** | **Modified On** |
| **Relationships** | | | | | | | |
|  | |  |  | |  |  |  |
|  | | | | | | | |
| **Reports** | | | | | | | |
| Reports\\Coding Summary By Node Report | | Report | Crys Projects | | 12/1/2022 3:30 AM | Crys Projects | 12/1/2022 3:30 AM |
| Reports\\Coding Summary By Source Report | | Report | Crys Projects | | 12/1/2022 3:31 AM | Crys Projects | 12/1/2022 3:31 AM |
| Reports\\Node Classification Summary Report | | Report | Crys Projects | | 12/1/2022 3:30 AM | Crys Projects | 12/1/2022 3:30 AM |
| Reports\\Node Structure Report | | Report | Crys Projects | | 12/1/2022 3:30 AM | Crys Projects | 12/1/2022 3:30 AM |
| Reports\\Node Summary Report | | Report | Crys Projects | | 12/1/2022 3:30 AM | Crys Projects | 12/1/2022 3:30 AM |
| Reports\\Project Summary Report | | Report | Crys Projects | | 12/1/2022 3:30 AM | Crys Projects | 12/1/2022 3:30 AM |
| Reports\\Source Classification Summary Report | | Report | Crys Projects | | 12/1/2022 3:30 AM | Crys Projects | 12/1/2022 3:30 AM |
| Reports\\Source Summary Report | | Report | Crys Projects | | 12/1/2022 3:30 AM | Crys Projects | 12/1/2022 3:30 AM |
|  | | | | | | | |
| **Results** | | | | | | | |
|  | |  |  | |  |  |  |
|  | | | | | | | |
| **Search Folders** | | | | | | | |
| Search Folders\\All Nodes | | Search Folder | Crys Projects | | 12/1/2022 3:30 AM | Crys Projects | 12/1/2022 3:30 AM |
| Search Folders\\All Sources | | Search Folder | Crys Projects | | 12/1/2022 3:30 AM | Crys Projects | 12/1/2022 3:30 AM |
| Search Folders\\All Sources Not Embedded | | Search Folder | Crys Projects | | 12/1/2022 3:30 AM | Crys Projects | 12/1/2022 3:30 AM |
|  | | | | | | | |
| **Sets** | | | | | | | |
|  | |  |  | |  |  |  |
|  | | | | | | | |
| **Source Classifications** | | | | | | | |
|  | |  |  | |  |  |  |
|  | | | | | | | |
| **Summaries** | | | | | | | |
|  | |  |  | |  |  |  |
|  | | | | | | | |
|  | | | | | | | |
| Reports\\Project Summary Report | | | | Page 3 of 3 | | | |
