# Supplementary material
Source: Research Square preprint supplement (doi:10.21203/rs.3.rs-8545290/v1)
Supplement: Supplementary file 8 [file af9f3f8644e4cf5fb903afdf.docx]

1. **Ernest Bibehe Insists End Of Course Examinations Must Hold**

*Added by*[**Bamenda Online**](https://bamendaonline.net/author/bamendaonline/)*on May 10, 2017.
Saved under*[**Education**](https://bamendaonline.net/category/society/education/)*,*[**National**](https://bamendaonline.net/category/national-2/)*,*[**News**](https://bamendaonline.net/category/news/) *Tags:*[**Anglophone crisis**](https://bamendaonline.net/tag/anglophone-crisis/)*,*[**Ernest Bibehe**](https://bamendaonline.net/tag/ernest-bibehe/)*,*[**gce**](https://bamendaonline.net/tag/gce/)*,*[**GCE Board**](https://bamendaonline.net/tag/gce-board/)*,*[**Hon. Fobi Nchinda**](https://bamendaonline.net/tag/hon-fobi-nchinda/)*,*[**Humphrey Monono**](https://bamendaonline.net/tag/humphrey-monono/)*,*[**minsec**](https://bamendaonline.net/tag/minsec/)

Secondary Education minister Jean Ernest Massena Ngalle Bibehe has assured examination stake holders in the region that his ministry would do everything to ensure that end of course examinations in the region run smoothly despite the looming socio-political climate.

The minster made the assurance during an in-camera meeting held at the Governor’s office Tuesday May 9, accompanied by the Registrar of the Cameroon GCE Board-Humphrey Monono Ekema,  the Director of the Office Du Bacc, and the director of examinations at the ministry. The delegation that drove in from the South West met with the administration, principal of some GCE accommodation centres, the regional delegate and other stake holders.

The MP for Bamenda-Bali, Hon. Fobi Nchinda, one of the few to brief the press about what was discussed behind closed doors said he made it clear to the minister that “ there is a problem in the Northwest and that children have not been going to school” He also said he specifically  told the Governor and the minister that they should make sure that the Head of State get the message that there is a serious crisis in the region and that the president should call a conference to discuss the form of the state and by extension the Anglophone educational system and the exams.

The MP also said he took the Minister to task on his insistence to run exams in the region when the school year has not been effective. This posed several problems he added, like the quality of education dispensed during the school year. “You cannot go examining children who have not been properly thought or totally thought…what he is going to do if he insists would be to kill the Anglophone educational system because it would come out with a GCE certificate which would not be accepted anywhere in the world”

He said he also raised concerns about the non examination classes whose problems have not been resolved. “ So what would happen if come September , if the crisis is over by September  what are you going to say about moving to the next class for children that have not been thought, what are you going to say about children entering secondary school because the entrance examination into secondary school would not have been valuable?”

He ended by saying his party the SDF has written to the president to “address himself to the Anglophone problem” and in so doing call a constituent assembly to discuss the form of the state which he hope would be a two state federation and that “sitting down to discuss with your brother is a sign of strength not weakness”

Though the exact numbers were not given, it emerged from the meeting that the GCE Board was some 50 000 candidate short of its expected target. The minister continued his tour today with a visit to some government secondary schools in Bamenda to evaluate the level of preparedness ahead of the examinations.

By Pedmia Shatu and Abongwa Fozo

<https://bamendaonline.net/ernest-bibehe-insist-end-of-course-examinations-must-hold/>

1. **Scotland Calls On Gov’t To Urgently Initiate Dialogue**

*Added by*[**Bamenda Online**](https://bamendaonline.net/author/bamendaonline/)*on January 4, 2018.
Saved under*[**National**](https://bamendaonline.net/category/national-2/)*,*[**News**](https://bamendaonline.net/category/news/) *Tags:*[**Anglophone crisis**](https://bamendaonline.net/tag/anglophone-crisis/)*,*[**Commonwealth**](https://bamendaonline.net/tag/commonwealth/)*,*[**Etienne Mainimo Mengnjo**](https://bamendaonline.net/tag/etienne-mainimo-mengnjo/)*,*[**Patricia Scotland**](https://bamendaonline.net/tag/patricia-scotland/)*,*[**Paul Biya**](https://bamendaonline.net/tag/paul-biya/)

The government of Cameroon has been urged to urgently initiate dialogue so as to curb the ongoing crisis in the two Anglophone Regions of Cameroon.

The Secretary General of Commonwealth, Patricia Scotland, made the call last December 22 during a press conference marking the end of her five days official visit to Cameroon.

Presenting her balance for the past five days in Cameroon, the Secretary General said after listening to the various political parties in Cameroon, religious leaders, youths and the civil society organisations, everything boiled down to dialogue which should be initiated immediately.

Here her, “I had the great opportunity and privilege of speaking to the Prime Minister, sharing with him all the things that have ben shared with me all these days and I think initiating dialogue is needed seriously. Government now has to consider what they wish to do as we go forward but most importantly, we need to be committed,” Patricia Scotland said.

According to the Commonwealth scribe, her only hope is that, there will be a beginning of a more intense, inclusive comprehensive but certainly a peaceful dialogue.

To her, “each participant in the dialogue need to listen to the other and if we listen, we may be able to understand the problem. I hope that as the parties go through the dialogue, they will develop a capacity to work in each other shoes so they can see the issue from the other person’s point of view because when you do that, you sometimes have a greater capacity to understand why the person on the other side thinks the way he or she thinks. Sharing enables you to come up with a solution that many of you may not have thought.”

While stressing that violence has never been a suitable or lasting solution to any crisis, Patricia Scotland said, the dialogue process should be a Cameroonian dialogue which involves everyone. She also said, it is left for the people of Cameroon to decide on the shape, the content and who should participate.

Without press-conditions, Patricia Scotland explained that the most important thing for people of Cameroon is to come together having an open mind and be honest and engaged in serious dialogue that only peace is needed at the end of the exercise.

Echoing that Cameroon have to decide what dialogue to initiate, she reiterated that dialogue needs to be based on promise of fairness.

“it is left on Cameroon to initiate the type of dialogue they want but they must find a path way which is peaceful, inclusive, substantive and honours the human rights of every single individual. Dialogue has to be based on promise of fairness,” She stated.

The Secretary General however said, during her visit in Cameroon, she meet with talented and lovely Cameroonians who spoke to her frankly, openly and in a very constructive way. Going by her, they discussed about the 1996 Constitution of Cameroon which provided for decentratlisation to kick off as well as the process and the speed at which it has gone.

Quest to know how the Commonwealth interns to used the report gathered to help resolve the ongoing crisis, Patricia Scotland stated that through a number of wonderful Cameroonian people working as part of the organisation, they will continue to work together seeking advice from other members so as to make Cameroon remain a beautiful nation since joining the organisation in 1995.

She added that if Cameroon feels that Commonwealth can assist technically or by participating in the peace process, they stand ready to come and help.

Before leaving Cameroon at 11:30pm that day, the Common Scribe admitted that her five days visit in Cameroon permitted her to present the Chattered of the Commonwealth signed by her Majesty, the Queen in 2013 to the president of Cameroon as well as having the privilege of understanding more of Cameroon history.

Besides the 250 different languages in the country, she came to know that long before Cameroon became the German, French of British, it was just Cameroonian, and all Cameroonian people were one, one city, one nation and undivided.

Contrary to rumours of being pushed by the opposition to visit the Anglophone region to see and experience things for herself, Patricia Scotland said, on her first day in Cameroon, Paul Biya gave her the lee way to visit Buea and other areas in Cameroon.

Above all, she called on all stakeholders during her meeting to pray for Cameroon handing all the difficulties of the nation to God for perfect direction.

The worry that remains on every lip is what happens after this contact tour, the word dialogue had been emphasized since the crisis in the North West and South west escalated to destruction and killings.

**BY ETIENNE MAINIMO MENGNJO**

<https://bamendaonline.net/patricia-scotland-calls-on-cameroon-to-urgently-initiate-dialogue/>

1. **Nigeria’s SSS ‘Arrest Cameroon’s Separatist Leaders’**

*Added by*[**Bamenda Online**](https://bamendaonline.net/author/bamendaonline/)*on January 7, 2018.
Saved under*[**News**](https://bamendaonline.net/category/news/) *Tags:*[**ambazonia**](https://bamendaonline.net/tag/ambazonia/)*,*[**arrest**](https://bamendaonline.net/tag/arrest/)*,*[**scnc**](https://bamendaonline.net/tag/scnc/)*,*[**Sisiku Ayuk**](https://bamendaonline.net/tag/sisiku-ayuk/)*,*[**southern cameroon**](https://bamendaonline.net/tag/southern-cameroon/)

Nigerian authorities have arrested leaders of a group leading a separatist movement in neighbouring Cameroon.

At least seven leaders of the Movement for the independence of Southern Cameroonians were arrested by the State Security Service on Friday in Abuja, several sources told PREMIUM TIMES.

The group leads a movement for an independent Ambazonia State, which seeks to break away from the domination of the French-speaking Cameroon.

Most leaders of the movement have since fled to neighbouring countries including Nigeria amidst a clampdown by the central government led by President Paul Biya.

The seven officials arrested include the leader of the group, Sisiku Tabe.

Others are Nfor Ngala Nfor, Fidelis Che, Henri Kimeng, Cornielius Kwanga, a professor identified as Awasum and a lawyer, Nalowa Bih.

They were arrested at Nera Hotel in Abuja.

"They were picked up yesterday by the SSS. They (SSS) came with guns and ammunitions to the hotel when they took them away. They arrived for a meeting of the high command of the leadership of the Ambazonia republic scheduled to hold at the hotel," our source said.

Cameroon has witnessed months of unrest as the push for the independent state intensifies, resulting in clashes between protesters and the police.

Dozens of people have been killed, including members of the security forces

Anglophone Cameroonians say they have been marginalised for years by the central government and the country's majority French-speaking population.

The agitation for secession heightened in October 2017 when the "Ambazonians" declared an autonomy over their region during the anniversary of their union with the French-speaking side.

The declaration was however rejected by the Biya government.

In December, a delegation from Mr. Biya was received by Nigeria's Vice President, Yemi Osinbajo.

The government said at the time that the purpose of Mr. Osinbajo's meeting with the Cameroonian delegation, led by the country's minister of Territorial Administration and Decentralization, Rene Sadi, was to strengthen diplomatic ties between the two nations.

Our source however said the meeting was also meant to broker a secret agreement for Nigeria's security officials to help arrest about 15 people declared wanted by the Cameroonian government.

The United Nations Refugee agency says at least 7,500 refugees from Cameroon's English-speaking population have since fled to Nigeria since the crisis in that country worsened in October.

The southern Cameroon comprising its English-speaking population joined their French counterpart in 1961, a year after the country's independence from colonial rule.

The English-speaking region says its citizens are forced to speak French, amassing its natural resources, amongst other oppressive behaviour.

The SSS could not be reached. The agency has no known spokesperson.

<https://bamendaonline.net/nigerias-sss-arrest-cameroons-separatist-leaders/>

1. **Gunmen Abduct Cameroon Separatist Leader in Abuja**

*Added by*[**Bamenda Online**](https://bamendaonline.net/author/bamendaonline/)*on January 7, 2018.
Saved under*[**News**](https://bamendaonline.net/category/news/) *Tags:*[**ambazonia**](https://bamendaonline.net/tag/ambazonia/)*,*[**arrest**](https://bamendaonline.net/tag/arrest/)*,*[**scnc**](https://bamendaonline.net/tag/scnc/)*,*[**Sisiku Ayuk**](https://bamendaonline.net/tag/sisiku-ayuk/)*,*[**southern cameroon**](https://bamendaonline.net/tag/southern-cameroon/)

Southern Cameroon's separatist leader, Sisiku Julius Ayuk Tabe, has been abducted in Nigeria.

A statement signed by Secretary of Communications and IT, Federal Republic of Ambazonia, Chris Anu, said Tabe was abducted by "gunmen from la Republic du Cameroun at about 19:30 pm in Nera Hotels, (Ekwueme Road), Abuja Nigeria on January 5, 2018."

The statement said the Federal Government of Nigeria had been notified of the incident and was currently investigating the situation. THISDAY could however not get official reaction on the abduction from officials of the foreign ministry or security agencies at the time of going to press.

Tabe heads the Interim Government of the Federal Republic of Ambazonia, after the Anglophone Southern Cameroon declared independence from Republic of Cameroon, which is the francophone part of the country, last year. In November, he named a series of secretaries into the interim national government. But the declaration of independence has not been recognised by the United Nations or any country.

Abducted along with Tabe, according to the statement, were Dr. Nfor Ngala Nfor, who is the chairman of the Southern Cameroons National Council (SCNC), Dr. Fidelis Nde Che, Dr. Henry Kimeng, Prof. Awasum, Dr. Cornelius Kwanga, Mr. Tassang Wilfred, Barrister Eyambe Elias, Dr. Ojong Okongho and Barrister Nalowa Bih.

The statement said Tabe and his team were in a "high command meeting in Abuja, Federal Capital Territory of Nigeria at the time the Cameroon gunmen showed up at the hotel. The meeting started at around 5pm, Nigerian time. At around 7:30pm, the gunmen came into the hotel and abducted all of them including the President."

It also said the meeting was scheduled to discuss the Southern Cameroon's Refugee crisis in Nigeria and to galvanise relief support for housing, medical and feeding in anticipation of the approaching rainy season.

The statement called on all Southern Cameroonians to remain calm as it pursues investigations into the abduction.

"We call on Nigerian authorities to address this issue immediately and ensure that the Cameroon Government does not do any harm to them. We also call on the Nigerian authorities to investigate this threat against its sovereignty by La Republique du Cameroon.

"We call on the Nigerian government to guarantee the security of the more than 20,000 Southern Cameroonian refugees in various camps in Nigeria," the statement further added.

<https://bamendaonline.net/gunmen-abduct-cameroon-separatist-leader-abuja/>

1. **Ayuk Julius Tabe Extradited From Nigeria**

*Added by*[**Bamenda Online**](https://bamendaonline.net/author/bamendaonline/)*on January 30, 2018.
Saved under*[**National**](https://bamendaonline.net/category/national-2/)*,*[**News**](https://bamendaonline.net/category/news/) *Tags:*[**Anglophone crisis**](https://bamendaonline.net/tag/anglophone-crisis/)*,*[**arrest**](https://bamendaonline.net/tag/arrest/)*,*[**Ayuk Julius Tabe**](https://bamendaonline.net/tag/ayuk-julius-tabe/)*,*[**Cameroon**](https://bamendaonline.net/tag/cameroon/)*,*[**extradition**](https://bamendaonline.net/tag/extradition/)*,*[**nigeria**](https://bamendaonline.net/tag/nigeria/)*,*[**Sisiku Ayuk**](https://bamendaonline.net/tag/sisiku-ayuk/)

Cameroon Anglophone Separatist Leader, Tabe, Extradited From Nigeria

The president of the anglophone separatist movement in Cameroon, Sisiku Ayuk Tabe, was extradited to Yaounde on Monday after being detained in Nigeria, the government said.

Ayuk Tabe, who had been held in Abuja since January 5, was sent to Cameroon with 46 of his supporters, Cameroonian government spokesman Issa Tchiroma Bakary said in a statement.

"A group of 47 terrorists, which includes Mr Ayuk Tabe, has been in the hands of the Cameroonian justice system for a few hours," Tchiroma said.

"They will answer for their crimes" before the Cameroonian courts, he added, underlining the "determination" of Nigeria and Cameroon "never to tolerate that their territories serve as a base for destabilising activities directed against one or the other".

Prior to their extradition, Ayuk Tabe and nine others had been "held in secret" at a hotel in Abuja, according to their lawyer and Amnesty International.

It was not possible on Monday to establish when the other separatists extradited from Nigeria to Cameroon were arrested.

In mid-January, Amnesty International expressed concern about the separatists detained in Nigeria, saying they "could be threatened with torture and (given) an unfair trial" if they are extradited from Nigeria.

Over the past year, there has been mounting tension in Cameroon's Southwest and Northwest regions — home to anglophones who account for about a fifth of the West African nation's population of 23 million.

English-speakers complain they have suffered decades of economic inequality and social injustice at the hands of the French-speaking majority.

Ayuk Tabe is campaigning for the two English-speaking regions of Cameroon to separate from the French-speaking part of the country.

On October 1 last year, the breakaway anglophone movement issued a symbolic declaration of independence for "Ambazonia", claiming autonomy over English-speaking regions.

Cameroon's President Paul Biya fiercely opposes secession and has met the agitation with a crackdown, including curfews, raids and restrictions on travel.

The country is preparing for general elections — including the presidential vote — at the end of 2018.

But observers say the ballot could be disrupted by the deep socio-political crisis in the English-speaking regions.

<https://bamendaonline.net/cameroom-anglophone-separatist-leader-tabe-extradited-nigeria/>

1. **Cameroon Being Sued for Internet Blackout (important)**

*Added by*[**Bamenda Online**](https://bamendaonline.net/author/bamendaonline/)*on January 31, 2018.
Saved under*[**News**](https://bamendaonline.net/category/news/) *Tags:*[**Anglophone crisis**](https://bamendaonline.net/tag/anglophone-crisis/)*,*[**Internet blackout**](https://bamendaonline.net/tag/internet-blackout/)*,*[**law suit**](https://bamendaonline.net/tag/law-suit/)

Cameroon is being sued for blocking the internet in its Anglophone regions

Two international digital rights advocacy groups have joined the growing clamor to stop Cameroon’s government disrupting internet services in its Anglophone regions.

Access Now and Internet Sans Frontières (ISF) have intervened on behalf a consortium of local and regional civil society organizations who previously sued the government for blocking access to the internet in the South West and North West English-speaking regions. In court documents filed to the constitutional council and seen by Quartz, the organizations say [the current shutdown](https://qz.com/1138529/cameroons-anglophone-ambazonia-region-has-had-internet-restriction-for-150-days-in-2017/) violates the rights to freedom of expression, access to information, non-discrimination based on language, and hinders economic, social, and cultural rights.

The filings, the first of its kind against a government by the organizations, seek to show the internet cut-off was violating regional and international frameworks that support the right to seek, receive and impart information and ideas through digital means. The petitioners also hope to show that the blanket ban was not proportionate and that the government failed to present a legitimate aim for the blackout.

“Justice delayed is justice denied,” said Peter Micek, the general counsel for Access Now. “The government needs to hear clearly, and urgently, from courts that these shutdowns violate Cameroonian and international law, and must end.”

For over a year now, the internet in the two Anglophone regions has either [been completely off](https://qz.com/902291/cameroons-silicon-mountain-is-suffering-losses-from-the-countrys-internet-shutdown/) or slowed down, with messaging and social media apps blocked for a total of 214 days as of Jan. 29 this year, according to both ISF and Access Now. The disruption began as protesters in the two regions demonstrated against political and economic discrimination from the majority French-speaking government. Last October, separatists [declared independence](https://qz.com/1122225/cameroons-diaspora-back-breakaway-ambazonia-southern-cameroons-region/) for a region they called Ambazonia, leading the government to kickstart a military crackdown. The violence that followed has [threatened to spin out of control](https://qz.com/1179202/cameroons-anglophone-crisis-is-threatening-to-spin-out-of-control/), leading to dozens of deaths and pushing at least 43,000 people to flee to Nigeria, [according to Reuters](https://af.reuters.com/article/africaTech/idAFL8N1PK4M1).

The current impasse also poses a direct challenge to president Paul Biya’s 35-year rule, and who, at 84 years of age, is expected to [run again this year](https://qz.com/1169321/eight-african-2018-elections-to-watch-egypt-sierra-leone-south-sudan-mali-zimbabwe-libya-cameroon-dr-congo/).

Biya’s government has also become strategic with regards to the shutdown [switching back the internet](https://qz.com/1183776/cameroon-anglophone-crisis-govt-puts-on-internet-to-fool-caf-commonwealth-guests/) for 48 hours in January as a delegation from the Confederation of African Football visited the region. The shutdown has caused [serious economic damage](https://internetwithoutborders.org/fr/one-year-of-bringbackourinternet-six-months-of-internet-shutdowns-for-citizens-of-english-speaking-cameroon/) and especially on the [budding tech industry](https://qz.com/902291/cameroons-silicon-mountain-is-suffering-losses-from-the-countrys-internet-shutdown/) in Buea town known as Silicon Mountain—a play on Silicon Valley and Mount Cameroon.

Micek said that he hopes the new lawsuit will draw global attention to how serious internet blackouts affect economic and human development. Telcos, who have been [pressured in the past](https://qz.com/893401/cameroon-pressured-mtn-and-other-operators-to-shut-down-internet-in-bamenda-buea-regions/) to suspend connectivity, should ally themselves against government censorship and not let officials “abuse their licenses and power over telcos to silence at-risk communities,” he said. “These disruptions will no longer occur in the dark.”

<https://bamendaonline.net/cameroon-sued-internet-blackout/>

1. **Would Paul Biya Heed To Trump’s Advice To Step Down**

*Added by*[**Bamenda Online**](https://bamendaonline.net/author/bamendaonline/)*on May 20, 2018.
Saved under*[**News**](https://bamendaonline.net/category/news/)*,*[**National**](https://bamendaonline.net/category/national-2/)*,*[**Politics**](https://bamendaonline.net/category/politics/) *Tags:*[**Paul Biya**](https://bamendaonline.net/tag/paul-biya/)*,*[**Peter Henry Balerin**](https://bamendaonline.net/tag/peter-henry-balerin/)*,*[**Presidential 2018**](https://bamendaonline.net/tag/presidential-2018/)*,*[**US**](https://bamendaonline.net/tag/us/)*,*[**US Embassy Cameroon**](https://bamendaonline.net/tag/us-embassy-cameroon/)

President Paul Biya and Ambassador Peter Henry Balerin at the Unity Palace (May 17)

In what could be seen as the greatest pressure to bear on the “L’homme Lion” of Etoundi after the advent of Multi-party democracy and the launched of the SDF in 1990, the most powerful country in the world, the US has subtly told the man at the heart of Cameroon politics for the past 43 years to think about how he would be remembered in history.

Peter Henry Balerin, US Ambassador to Cameroon after an audience with President Paul Biya on May 17 at the Unity Palace told the press that “  ‎*I suggested to the President that he should be thinking about his legacy and how he wants to be remembered in the history books to be read by generations to come*” adding that  he had  “*proposed that George Washington and Nelson Mandela‎ were excellent models*”  for him to follow.

This is undoubtedly a strong signal from the US to Mr. Biya, barely months to the next presidential elections in Cameroon due for October.  Unlike ahead of the 2004 and 2011 election, there is no indication yet that Mr. Biya would announce his candidacy for the presidential election. His ruling CPDM party has remained largely muted with calls for him to run (the people calls) So far echoes of that have been heard mainly from party cells in the Centre region and from some of his close collaborators and kinsmen.

 Ambassador’s Balerin’s advice follows that of Arch Bishop Samuel Kleda of Douala and President of the National Episcopal Council in an Interview he granted the French Paper, La Nouvelle Expression,  published on Tuesday December 5, 2018 where he said  “if President Paul Biya really loves this country, he would rather think of a peaceful transition by passing power to another person, either within his party, the CPDM, or within a party of the opposition.

But President Paul Biya has not been known to give in easily to pressure. He survived the 1984 coup, the 1990 multi party onslaught and weaver the economic crisis of the late 80s and early 90s.

Beside Government Spokesman, Issa Tchiroma has been quick to come to his defense, saying Cameroon is a sovereign nation and that Mr. Biya has more love for Cameroon than any other and would leave the scene through the front door.

2018 could be a difficult year for Cameroon whose fragile unity is threatened on several fronts, most especially by Anglophone separatist who want a new country for the English speaking regions of Cameroon.  Beside, Cameroon is still expected to hold parliamentary, council and general elections before the close of 2018.

By Abongwa Fozo

<https://bamendaonline.net/would-paul-biya-heed-to-trumps-advice-to-step-down/>

1. **N.W Journalists Schooled on Back to School & Elections Reporting**

*Added by*[**Bamenda Online**](https://bamendaonline.net/author/bamendaonline/)*on September 5, 2018.
Saved under*[**News**](https://bamendaonline.net/category/news/)*,*[**Education**](https://bamendaonline.net/category/society/education/)*,*[**Law & Human Rights**](https://bamendaonline.net/category/society/law-human-rights/) *Tags:*[**Elections**](https://bamendaonline.net/tag/elections/)*,*[**journalists**](https://bamendaonline.net/tag/journalists/)*,*[**Mbengwi Online**](https://bamendaonline.net/tag/mbengwi-online/)*,*[**presidential2018**](https://bamendaonline.net/tag/presidential2018/)*,*[**school reopening**](https://bamendaonline.net/tag/school-reopening/)

Media persons drawn from over thirty organs in the North West have been schooled on how to report back to school and elections without stepping on toes. This was during a two day workshop at Up Station Bamenda organised by the Regional Delegation of Communication on  Thursday 23rd and Friday 24th August 2018. Through several presentations by invited resource persons, reporters were taught how to effectively report on the back to school campaign in the two English speaking regions without provoking the wrath of either concerned parties: anti school activists that want a continuation  of the educational system completely grounded and the government that wants schools to effectively resume at all cost. To strike a balance, attendees were encouraged to focus their reports on the importance of education and allow those involved (parents and their children) to decide. A clear example, even anti school activists are able to carry on with their activism because they were educated. Thus if the fight must continue, then it’ll take only the educated to champion it.

On day one of the workshop, in his presentation on **The Sociopolitical Environment and Problematic of Back to School in the N.W.R,** the communication delegate, Dr. Louis Marie Begne told the media colleagues that in reporting back to school and elections, there are truths that cannot be disclosed because the reporter wants to give peace a chance although it may be against the rules of the profession. This was corroborated by Dr. Ngobesing Suh Romanus, erstwhile CRTV reporter and current Station Manager of Radio Evangelium, Bamenda whom while presenting on **The Mass Media as Instrument of Behaviour Modification**cautioned attendees to only play their role as journalist in reporting back to school and not become propagandists, activists or public relations officer for any party.

To better equip the practitioners in facing the challenges of reporting on the subject, social media circulated tracks on back to school were printed and given to the journalists to extract vital points that can be used in their reports, some of which carried messages of how there’s been a mass influx of Anglophone students into Francophone schools thus causing a  speedy devaluation of the Anglosaxon system of education the N.W and S.W regions once prided themselves of plus a huge transfer of hard earned money into French regions in the form of fees and rents. Many educational institutions withing the English regions have either been burnt or shut down and are currently undergoing dilapidation, a detriment to the Anglophones and that in fighting for secession, ironically there’s rather been more national integration because thousands of Anglophone families have rather escaped into the French regions to seek refuge.

Speaking on **The Contribution of the Media for a Successful and Serene Back to School 2018/2019,**Mr. Ephraim Banda Goghomu, Head of the Communication Unit, National Polytechnic University Institute, Bamenda said to the media men and women *“The job of reporting is dangerous as there’s high risk of stepping on toes but real journalists must face it with courage, wisdom and prudence.”*He simplified his view by saying *“To be on the safe side, if you can’t speak for school resumption, it’s better you stay quiet.”*

Day two of the workshop focused on media coverage of the October presidential elections and peace in the N.W region. The same facilitators schooled their peers on Peace and Elections Reporting, The Communication Context and Framework of the Oct. 7th Presidential Elections, Education, Sensitisation and Mobilization Before, During and After Elections. Dr. Ngobesing Suh Romanus articulated that *“We live in a country where people’s attitude towards elections to say the least is negative. Many don’t register. A good number of those who register don’t even vote. Elsewhere people fight for the right to vote yet are not given it while in Cameroon, people have been given the right to vote yet are not exercising it.”*He went ahead to say in elections reporting, journalists ought to present the importance of an election, what it means to vote and not to vote, profile the candidates, their political agendas and campaign plan. Moreover, the reporters were told that during an election, they aren’t different from someone between the lion and the deep sea. That election is the most crucial moment in the life of any country; a time when power is fought for, lost, won or consolidated.

However in doing all of these, journalists must prioritise their security over any other thing for a good journalist wants to report and live after the report so as to keep reporting. As Dr. Ngobesing better put it, *“No one sees a wall and goes hitting his head against it because he wants to get it shattered so as to get to the other side.”*

Although some  misunderstandings occurred on the last day of the workshop between the Regional Communication Delegate and the Secretary General at the N.W  governor’s office, Mr. Lanyuy Harry Ngwani over control of finances for the project, it was still rated a full success especially as the the financial issues were resolved. A radio magazine and spots on back to school were produced at the end of the workshop and are currently being aired on the stations that partook in the workshop.

It should be recalled that around same time last year when a similar workshop was being held at Up Station Bamenda, good news came in from Yaoundé that the Head of State had authorised the unconditional release of many of those who were arrested and incarcerated at Kondengui in connection with the crisis. This news plus the output of journalists greatly caused a positive and remarkable increase in the functioning of schools and performances at end of year exams within the region. A similar breaking news occurred too this year, few days after the workshop. The Communication Secretary of the Ambazonia Governing Council, Chris Anu announced on social media that parents in the two English speaking regions can now send their children to school but the security of their kids will remain their responsibility because fighting is still on.

Many key public figures, parents and students themselves want schools to resume even if the fighting must continue but the worry of everyone is the fear of the unknown. They wish the two concerned regions could be demilitarized, the remaining detained activists released, a cease fire announced and a return to normalcy, conditions for a conducive learning environment.

<https://bamendaonline.net/n-w-journalists-schooled-on-back-to-school-elections-reporting/>

1. **SNWOT Lament For Peace-Calls For Inclusive Dialogue**

*Added by*[**Bamenda Online**](https://bamendaonline.net/author/bamendaonline/)*on September 8, 2018.
Saved under*[**News**](https://bamendaonline.net/category/news/)*,*[**National**](https://bamendaonline.net/category/national-2/) *Tags:*[**Anglophone crisis**](https://bamendaonline.net/tag/anglophone-crisis/)*,*[**Bamenda**](https://bamendaonline.net/tag/bamenda/)*,*[**SNWOT**](https://bamendaonline.net/tag/snwot/)

A group of woman under the canopy of the 11 (SNWOT) today staged a sit down protest calling for  ceasefire between the two warring parties in the ongoing conflict in Cameroon’s two English speaking regions. The cry of lamentations as they called it was staged in the confines of the Bamenda Municipal Stadium, minimizing its impact.

“We want peace” “we are tired of the war” “our children are dying every day” “Let the war come to an end” “the women cried out loud in pain” were some of the many messages displayed on placards. Others carried the peace plant “Nkeung” as a reminder of the need for peace.

The women who came from all works of life wailed, calling on the International community to look into the crisis rocking the Anglophone regions. A series of intercession prayers for the return of peace were made. They drew their inspiration from the book of 2 Chronicles 2:14 and Jeremiah 9:17-19 which calls for such actions.

SNWOT was created by Madam Uma Esther is out to encourage women gain courage to advocate for peace. This was evident in some of the messages they carried like “guns don’t talk, people do”, “All forces cease fire” and “women want peace”.

The Northwest coordinator for SNWOT Madam Adah Mbah explained that Women want peace and that the bible says “we women should wail”. For more than two years we have been quietly losing our children, husbands and relatives to the cold hands of death she added.

Adah Mbah called on SNWOT women and the women in general to continue praying at home while hoping to see the country return to normalcy. A series of solutions were proposed by SNWOT women with the first being an all inclusive dialogue that would bring a long lasting solution. She said SNWOT has other means of putting pressure on both sides of the conflict which will be made public soon. This is the second after the first which held in Buea, Southwest region last month.

By Neba Sulivan (UB Student Intern)

<https://bamendaonline.net/nw-women-lament-for-peace-calls-for-dialogue/>

1. **Adolphe Lele Woos Fighters With Psycho-social & Logistical Support Upon Repentance**

*Added by*[**Abongwa Fozo**](https://bamendaonline.net/author/fozo/)*on September 18, 2018.
Saved under*[**Administration**](https://bamendaonline.net/category/northwest/administration/)*,*[**News**](https://bamendaonline.net/category/news/) *Tags:*[**Adolphe Lele Lafrique**](https://bamendaonline.net/tag/adolphe-lele-lafrique/)*,*[**Anglophone crisis**](https://bamendaonline.net/tag/anglophone-crisis/)

The governor of the N.W Region of Cameroon, Adolf Lele Lafrique has called on the population of his region of command to remain the peace loving, law abiding and above all God fearing citizens that they’ve always been in the face of the ongoing sociopolitical and security turmoil rocking the region. He made this call last Friday September 14 2018 in a press release he read out to media persons in the MINEPAT regional delegation conference hall, Up Station, Bamenda.

He began by first announcing to the entire population of the region that following the growing acts of killing, kidnapping for ransom, looting of property, destruction of personal documents and generalized vandalism perpetrated against pupils, students, teachers, innocent civilian masses and the defence and security forces accompanied by threats from secessionist activities promising to ground socioeconomic activities and hinder circulation of persons within, into and out of the region in the days ahead, government has taken appropriate measures following very high instructions from the Head of State to guarantee the collective safety and security of the movements and activities of the inhabitants of the region through the end of year festivities and stop trouble makers.

Adolf Lele Lafrique reiterated what had since been in practice, that movements of persons and goods shall be subjected to strict (but highly professional) controls in accordance with section 2 of Law No. 90/54 of 19 Dec. 1990. He warned that private individuals, commercial vehicles or motorbikes that shall be caught in the act of transporting terrorists or compromising materials and those facilitating such transactions shall simply be assimilated as terrorists themselves and treated as such.

In the press release, the governor also called on all parents, children, loved ones, brothers and sisters who have been misguided and misled to take up arms against the fatherland to surrender their weapons to the nearest Administrative, Traditional, Municipal or Religious authority and as a follow up, they shall be entitled to psychological and logistical support for their eventual rehabilitation and reintegration into society.

The strengths of the diaspora in stirring the struggle weren’t underestimated. Adolphe Lele Lafrique offered them an olive branch by saying,*“Our brothers and sisters in the diaspora are called upon to desist from manipulating the population and sponsoring socioeconomic hardship and illiteracy, but to instead redirect their hard earned resources to socioeconomic development and education which they themselves benefited from and which has made them the respectable men and women they are; and to accompany the government in Nation building as true and committed patriots.”*

He ended by asking God to bless Cameroon. However, it should be noted that before, during and after the governor’s release, hundreds of public transport vehicles fully loaded with goods and passengers kept speeding out of the region, clearly indicative of the governor’s call for  inhabitants to stay put and go about their normal life unperturbed to have fallen on deaf ears.

Before now, contradictory messages of calls from the supposed Ambazonia leaders abroad and ground zero fighters for a complete shutdown of the two Anglophone regions for close to a month had been widely spread on social media. They were received with high condemnation and opposition. Though subsequent messages from various angles have been trying to reprogram the supposed shutdown, in a bit not to add insult to injury, such are alleged to be coming little too late because for fear of the unknown and foreseeing their inability to stay indoors for close to a month, an alarming proportion of the population has been fleeing into Bafoussam, Douala, Yaounde and other towns to seek refuge.

The crisis have continued to escalate because both separatist fighters and government troops have vehemently refused to listen to the numerous resounding calls for an immediate ceasefire and commencement of  dialogue. Instead both parties have rather been going in for more and more sophisticated weaponry to exhibit their might. In the midst of this two elephants fights, the grass (innocent citizens) is suffering.

<https://bamendaonline.net/adolphe-lele-woos-fighters-with-psycho-social-logistical-support-upon-repentance/>

1. **Open letter to H.E Paul Biya, newly re-elected President of Cameroun**

*Added by*[**Bamenda Online**](https://bamendaonline.net/author/bamendaonline/)*on November 7, 2018.
Saved under*[**News**](https://bamendaonline.net/category/news/)*,*[**opinion**](https://bamendaonline.net/category/opinion/opinion-opinion/) *Tags:*[**Anglophone crisis**](https://bamendaonline.net/tag/anglophone-crisis/)*,*[**Paul Biya**](https://bamendaonline.net/tag/paul-biya/)*,*[**Sen. Honore Ngam**](https://bamendaonline.net/tag/sen-honore-ngam/)

Your Excellency,

I followed your inaugural address on the 6 November 2018 with keen attention and with particular focus on your plan to end the raging war in the North West Region and South West Region.

Your Excellency, permit me to recall that the conflict in the North West Region and South West Region is the outcome of long standing acrimony within the Anglophones over the abrogation of the two states federation in 1972 and the subsequent marginalization and assimilation of Anglophones. The strike action of lawyers and teachers that began in 2016 merely constituted a milestone in Anglophone resistance to marginalization and subjugation. This explains why the sectoral demands of the lawyers and teachers quickly morphed into a political, economic, social and humanitarian crisis that has been escalating by the day.

As a consequence of the conflict, it is estimated that over 1000 lives have been lost, hundreds of thousands internally displaced, over 30 000 refugees, villages torched, over 1000 persons incarcerated, disruptive school attendance, livelihoods destroyed as a consequence of the breakdown of law and order in most almost all the towns and villages of these regions.

In the light of the preceding, a call to lay down arms will yield fruit if it is accompanied by a comprehensive peace plan that addresses the root causes of the conflict with a view to providing a lasting solution to grievances that span decades.

This conflict is a political conflict requiring a political settlement and not the use of force which so far has proven to be counter productive. The result of the military option has actually been an escalation of the conflict.

It therefore behooves Your Excellency to review your plan for the resolution of the conflict in the North West Region and South West Region and seriously consider seeking a lasting political solution to the conflict as soon as possible.

Thank you for your kind attention.

Respectfully,

Senator. Honoré NGAM
North West Constituency

<https://bamendaonline.net/open-letter-to-h-e-paul-biya-newly-re-elected-president-of-cameroun/>

1. **Residents Caught in Outbreak of Violence in Cameroon (important)**

*Added by*[**Bamenda Online**](https://bamendaonline.net/author/bamendaonline/)*on February 26, 2019.
Saved under*[**Law & Human Rights**](https://bamendaonline.net/category/society/law-human-rights/)*,*[**News**](https://bamendaonline.net/category/news/) *Tags:*[**Anglophone crisis**](https://bamendaonline.net/tag/anglophone-crisis/)*,*[**anglophone education**](https://bamendaonline.net/tag/anglophone-education/)*,*[**HRW**](https://bamendaonline.net/tag/hrw/)

A school classroom in the Anglophone region of Cameroon.
 © 2018 Bede Sheppard/Human Rights Watch

On February 16, 170 students, mostly girls under 18, were abducted by a group of armed separatists from a boarding school in Kumbo, in the North-West region of Cameroon. The separatists, who stormed the building in the early hours, also abducted a teacher and two guards. Everyone was released the following day amid rumours of ransoms being paid. The school remains closed.

Human Rights Watch has interviewed numerous witnesses and reviewed many images of the recent abuses in Kumbo.

The crisis in the Anglophone regions has taken a heavy toll on education. Separatists and unknown assailants have damaged, destroyed, or burnt down scores of schools and kidnapped hundreds of students across the regions.

The security situation in Kumbo is extremely volatile and the city has been in a state of crisis since September. Over the weekend, in what appears to be an act of retaliation against residents perceived as sympathetic to the separatists, security forces burnt down scores of private homes and shops across Kumbo. Destruction of private property by the Cameroonian security forces has been rife since the crisis started. Human Rights Watch has documented the burning of more than 20 villages by members of the security forces between 2017 and 2018 in both the North and South West regions.

The day after the mass abduction, soldiers looking for wounded separatists broke into the Shisong hospital and fired several shots in the air. The soldiers also threatened to kill a man in front of hospital staff. This comes as reports highlight more attacks on health facilities, including the looting of a health center in Wosing village by separatists on February 15, and the destruction of the Kumba district hospital on February 11

Kumbo remains almost completely shut down due to ongoing violence between separatists and security forces. Thousands of people have fled the area since violence escalated. Those who stayed behind have told Human Rights Watch they live in fear of the violence

Both Cameroonian authorities and the separatists should stop unlawful abuses of residents and ensure that humanitarian actors have free and unhindered access to the area to assess needs of the population and provide assistance.

<https://bamendaonline.net/residents-caught-in-outbreak-of-violence-in-cameroon/>

1. **Why We Must Protect Our Economy In The NW And SW Regions**

*Added by*[**Bamenda Online**](https://bamendaonline.net/author/bamendaonline/)*on February 28, 2019.
Saved under*[**News**](https://bamendaonline.net/category/news/)*,*[**Socio-Economic**](https://bamendaonline.net/category/society/development/) *Tags:*[**Les Brasseries**](https://bamendaonline.net/tag/les-brasseries/)*,*[**nw**](https://bamendaonline.net/tag/nw/)*,*[**SABC**](https://bamendaonline.net/tag/sabc/)

(Finance District) Bamenda city

The political crisis in the North West and
South West regions of Cameroon, the economic sector is greatly hit as most
business have been forced to fold up as the local population continues to lose
jobs.

The brewery sector has been greatly hit in the
crisis as activities slow down due to a purported ban by separatist on products
of Les Brassseries du Cameroun because it is a French company.

This is not true. The SABC group has been in
Cameroon for the past 70 years at the service of the nation, largely employing
Cameroonians. The groups alone is the largest employer in the private sector
with at least 200.000 workers with the North West region alone holding about 13
percent of that figure, not to talk of the over 10.000 indirect jobs the
company creates. To force several Cameroonians in these two regions to stop
working is a falsehood which shouldd be wiped out.

For over 70 years, we have strived to better
the living conditions of our workers and Cameroonians and has at least 400
collaborators in the North West and South West regions who share our vision
with their families. The group can also point to the fact that it has always
been with the people through cultural festivals like NGONNSO, LEILA, ABINE NFOR, SHAATANG,
NIKAI, GUZANG, WIDIKUM, BATIBO.

The Anglophone community is proud of Clinton Njie today who
is a product of Les Brassseries Football Academy while several winners of the
Mutzig star competition from the Anglophone regions have gone on to shine
thanks to the company.

Because the security and safety of workers is a priority, the
company has decided to shut  down shops
in some cities in the North West and South West regions but the company firmly
remains with the population of these regions in these trying moments. The
company believes it is a collective effort with the population to beat fear and
revive the economy. The company can only grow for Cameroonians, with
Cameroonians and by Cameroonians.

Note should be taken that SABC has  01 commercial Centre in
Bamenda and 04 Depots (Kumbo, Nkambe, Wum and Fundong) in the Northwest. The combine work forces in this centres stands at over 400
workers, with over 200 in Bamenda and about 50 in each of the 4 Depots, a
majority of whom are from the North West Region.

Beside sponsoring and supporting  annual dances like NGONNSO, LEILA, ABINE NFOR,
SHAATANG, NIKAI, GUZANG, WIDIKUM, BATIBO etc), SABC also carries out various
Open Days in schools and communities promote
Northwest talents though it Mutzig star, Top Cup Competition, Holiday Championships with “33” Export,
Fanta  Holiday show, Sprite street dance, Trade fair and its Christmas for
all (parties for schools, groups, associations, Scholarships to Pupils and
Students, Academic Internships etc. SABC also
carry out health community programs like free screening
of high blood and diabetes, distribution of water in hospital wards, donations
to schools etc.

<https://bamendaonline.net/why-we-must-protect-our-economy-in-the-nw-and-sw-regions/>

1. **Expatriates Report Horrors in Africa’s Cameroon (important)**

*Added by*[**Bamenda Online**](https://bamendaonline.net/author/bamendaonline/)*on May 25, 2019.
Saved under*[**Reports**](https://bamendaonline.net/category/special-reports/reports/) *Tags:*[**Anglophone crisis**](https://bamendaonline.net/tag/anglophone-crisis/)

Security officials searching civilians in Bamenda in the restive Northwest Cameroon

(CN) — Beheaded corpses. Entrails spilled onto dusty roads. Photos from the civil war raging in his home country Cameroon nauseate the professor. “Sometimes I wake up and on my WhatsApp feed there’s some pictures I cannot even take, I just have to delete, they’re gruesome,” he said.

It’s time for the world
to wake up, he says, to the conflict in that has displaced more than
400,000 people and left at least [1,800 dead](https://foreignpolicy.com/2019/05/13/cameroons-separatist-movement-is-going-international-ambazonia-military-forces-amf-anglophone-crisis/) as government forces battle groups of
separatist fighters and burn villages inhabited by suspected separatist
sympathizers to the ground.

The separatists’ goal is to win independence for western regions
of Cameroon, on the border with Nigeria, and create an independent country
called Ambazonia for English-speaking residents who feel they’ve been relegated
to second-class citizens by a president who has been in office for 37 years and
foists the government’s preferred language on them.

There are 265 languages spoken in Cameroon, but the conflict involves just two: English and French.

The dispute is not solely a linguistic one. Its tangled roots
stretch back to 1916, when Germany ceded control of the territory comprising
modern day Cameroon to France and Britain.

“So Cameroon was split to the French, about 80% of present-day
Cameroon, and to the British about 20%,” said Professor Nandi. Nandi, a
pseudonym, is a medical doctor and naturalized U.S. citizen who teaches at a
university in the American South.

He asked not to be identified because he periodically returns to
Cameroon for health studies, and expatriate detractors of President Paul Biya
have been arrested at Cameroon airports and jailed on questionable charges.

**A
Broken Deal**

In 1961, Anglophones, then known as British Southern Cameroons,
were given a choice by a British government eager to distance itself from its
dark, empire-building past: Do you wish to achieve independence by joining the
Federation of Nigeria, another former British colony, or do you wish to achieve
independence by joining the France-backed independent Republic of Cameroun?

With outright independence off the table, the British Southern
Cameroons voted to join the Republic of Cameroun in a deal that stated: “The
peoples of both territories should have equal status and rights.”

Fast-forward to autumn 2016, when teachers and lawyers in Anglophone regions reached a breaking point and took to the streets in protest, weary of a government that had strayed far from the spirit of the 1961 deal.

Not only had state agencies under Biya frustrated
English-speakers for years by issuing public notices in French, with no English
translation, Biya’s regime had begun sending French-speaking teachers and
judges to schools and courts in Anglophone regions.

By then, Tuskegee University communications professor and poet
Bill Ndi had left Cameroon to teach in Paris, then to the United States. He won
political asylum in the U.S. after the Cameroon embassy in Paris confiscated
his passport due to his history of criticizing Biya.

Ndi, a naturalized U.S. citizen since 2016, is still speaking
his mind about Biya. “He cannot speak English. … In a bilingual country he
cannot carry a conversation. Even saying good morning to him is an uphill
battle,” Ndi said in a telephone interview.

Ndi said employment in Anglophone regions is flipped compared to
the Francophone areas, as 80 percent of French speakers have jobs, and 80
percent of English speakers are unemployed.

Though there are English-fluent teachers in Anglophone regions,
Ndi said, many are unemployed because the government has assigned
French-speaking teachers to the schools.

“You have people who cannot speak English barely at all. They
are expected to teach these children geography, history, math, physics,
chemistry,” Ndi said.

The courts are an even bigger mess, Ndi said, because in
Anglophone regions they are based on common law, a system originated by the
English monarchy in which case law, or precedent, is primarily used to resolve
legal disputes.

But courts in Francophone areas operate under French civil law
system wherein statutes are more important than precedent.

“They bring us French judges in our courts, judges who do not
understand our legal systems. How do you expect to have justice in that kind of
situation?” Ndi said. “The lawyers who have studied in the U.S., the U.K.,
Nigeria or who have studied in Cameroon, all their lives in English, they are
expected to write all their motions and their depositions in French because the
judge doesn’t understand English.”

**Fighting
for Ambazonia**

The peaceful protests in late 2016 precipitated a bloody civil
war that started the next year when security forces opened fire on crowds from
helicopters, and Ambazonia separatists fought back against troops who have been
torching villages and beating and killing people whom they believe support the
Ambazonians.

In early 2017, police arrested hundreds of people as they went
from house to house looking for separatist fighters and leaders of the Southern
Cameroons National Council, a coalition of student, union and activist groups
that has pushed for independence for Anglophones for years.

To stifle the resistance, the government shut down the internet
for weeks in the area in spring 2017, instituted a curfew and sent in troops
who raided homes under cover of darkness.

The separatist fighters, whose numbers are estimated at 2,000 to
4,000, responded by instituting “ghost town” strikes in Anglophone cities and
villages, in which all businesses, schools and services are shut down, for
weeks or months, and would-be strikebreakers are threatened with violence.

Professor Nandi said the Anglophone areas are replete with oil,
timber, cocoa farms and banana plantations.

“So at the crux of the Anglophone problem, the French, do not
want the English people to have equal rights or to have their own state because
then they cannot control those resources,” he said.

Nandi said France’s military support and weapons sales to
Cameroon have kept the 86-year-old Biya in power for more than three
decades.

The French embassy in Washington, D.C. did not respond when
asked if France has tried to mediate peace talks in Cameroon, nor to
accusations that France is exploiting Cameroon’s natural resources.

Biya labeled the separatists terrorists and refused to negotiate
with them, announcing in August 2017 that agitators were being monitored.

Nandi said police at checkpoints vet the identifications of
people queuing up to board buses headed from Anglophone regions to the
country’s financial capital Douala and its capital Yaoundé.

“They like to keep tabs on who is moving,” Nandi said. “So it’s
a police state. If they have an inkling you are somebody with opposing views,
they keep tabs on you. They put some people on no-fly lists at airports; they
make sure some people don’t fly.

“I have colleagues who were arrested in Douala just because they
know they have been sympathetic to Ambazonia. So they get arrested when they
enter the country. They arrest you or they deny you entry.”

With the civil war in its second year, the United Nations
Security Council held its first informal meeting about the conflict on May 13,
over the Cameroonian government’s objections.

The international
spotlight apparently moved Biya to scrap his vow not to negotiate with
separatists: [Africanews](https://www.africanews.com/2019/05/14/new-reconciliation-plan-launched-in-cameroon-morning-call/) reported on May 14 that Biya sent his prime
minister on a “reconciliation mission” to the Anglophone regions with
instructions to hold talks with separatist groups.

Despite Cameroon security forces’ attacks on civilians, the
United Nations General Assembly elected Cameroon in October 2018 to the UN
Human Rights Council for a three-year term, which began on Jan. 1 this year.

UN spokesman Farhan Haq said in an email it is up to the General
Assembly’s member states to decide whether to remove a country from the Human
Rights Council.

**The
Road to Asylum**

Nancy Oretskin runs the nonprofit Southwest Asylum and Migration
Institute out of her home in Las Cruces, New Mexico.

She started practicing immigration law on the side while
teaching law at New Mexico State University, and retired in July 2018 after 29
years at the school, to focus on helping refugees.

She has built a reputation as a tireless attorney taking on pro
bono asylum cases of people detained in an immigration prison in El Paso,
Texas, an hour drive from Las Cruces.

El Paso immigration
judges rarely grant asylum. They approved just [**seven of 225**](https://www.courthousenews.com/lawyers-blast-hostility-in-texas-immigration-court/) applications
in fiscal years 2016 and 2017, according to a recent report by the American
Immigration Council.

As of December 2018, Oretskin had represented 12 Cameroonians in
immigration courts in El Paso and Otero, N.M., and won asylum for seven of
them, she said in a telephone interview.

Speaking from home after a long day of meetings with clients,
she said, “You know it’s the ones you lose that you lie awake at night on.”

Oretskin said she also has represented people from Somalia,
Zimbabwe, Gambia, Eritrea, Ethiopia, Liberia and Ghana. “I’m white, by the
way,” she said.

She said there are two main routes by which her Cameroonian
clients reached the Southwest border. Some flew to Madrid, Spain, then to
Mexico City and traveled by foot or bus to the United States.

“The other ones go to Ecuador, because from Cameroon you can go
to Ecuador visa-free,” Oretskin said. “And then they travel in groups on foot
from Ecuador. So they have to get to Columbia and then they’ll have to cross
the Darién Gap,and a lot of them are robbed. Their passports are stolen. Or
when they get to Mexico they’re told by people, ‘Oh if you get to the U.S. with
your passport, they’ll deport you.’ So they tear up or throw their passports
out.”

Oretskin estimated that 90 percent of the Cameroonians who arrive
at the U.S. border do not have passports. “And that’s a big issue on
credibility,” she said.

She told Courthouse News in late December 2018 that she had
spoken to several of her Cameroonian clients about being interviewed for this
story and all were too scared to talk to a reporter.

According to the
Department of Homeland Security, from October 2014 through September 2017,
the [latest data available](https://www.dhs.gov/immigration-statistics/yearbook/2017/table17), 663 Cameroonians were granted asylum in
the United States.

Professor Nandi said he receives updates on the civil war from a
group of his high school classmates via social media platform WhatsApp, some of
them with photos of grisly murder scenes.

His own family has not been spared from the violence. “I have a
younger brother who got shot at earlier this year. There was a question if it
was government or Ambazonia forces, but he got shot at. Luckily, he survived.
So that’s the daily experience of many of us.”

Despite the scant media coverage in the United States, Nandi
said Americans should care because people’s rights are being trampled in
Cameroon.

“I think it behooves the United States to speak up to dictators
so they can bring about transparency and democratic freedom just as we enjoy
here. That would also help stem the tide of migration to the United States,” he
said.

<https://bamendaonline.net/expatriates-report-horrors-in-africas-cameroon/>

1. **President Biya’s Speech, 10/09**

*Added by*[**Bamenda Online**](https://bamendaonline.net/author/bamendaonline/)*on September 14, 2019.
Saved under*[**National**](https://bamendaonline.net/category/national-2/)*,*[**News**](https://bamendaonline.net/category/news/) *Tags:*[**Anglophone crisis**](https://bamendaonline.net/tag/anglophone-crisis/)*,*[**national dialogue**](https://bamendaonline.net/tag/national-dialogue/)*,*[**Northwest**](https://bamendaonline.net/tag/northwest/)*,*[**Paul Biya**](https://bamendaonline.net/tag/paul-biya/)*,*[**Southwest**](https://bamendaonline.net/tag/southwest/)

President Paul Biya

Fellow Cameroonians,

My Dear Compatriots,

For close to three years now, the North-West and South-West Regions of our country have been going through a crisis that not only jeopardizes the safety and well-being of the population living there, but also has far-reaching consequences for the national community as a whole.

It should be recalled that the crisis was triggered by corporate demands made by lawyers and teachers calling for the translation of the OHADA Uniform Acts into English and the preservation of the specificity of the Anglo-Saxon judicial and educational systems in the two regions.

From the outset, and true to an option that I hold dear, I instructed the holding of dialogue between the Government and trade unions to seek appropriate solutions to these demands. The measures taken by the Government at the end of these consultations went well beyond the initial demands and include:

- the translation into English of the OHADA instruments which are now available in the two official languages;
- the creation of a Common Law Section at the Supreme Court to handle appeals filed against the decisions of lower courts in Common Law matters;
- regarding the training of judicial and legal officers, the creation of a Common Law Section at the National School of Administration and Magistracy. This measure was accompanied by a programme for the recruitment of English-speaking pupil judicial and legal officers and court registrars;
- the launching of the special recruitment of bilingual teachers in secondary schools;
- at the level of the judiciary, the stay of proceedings against some persons arrested in connection with the demands;
- the setting up of a national Commission for the Promotion of Bilingualism and Multi-culturalism to, among other things, carry out an in-depth review of all the sources of frustration suffered by our compatriots in the North-West and South-West Regions.

Decisions were taken subsequently to fast-track the decentralization process, with the creation of a new ministry devoted thereto. The upcoming regional elections will complete the process by enabling our compatriots nationwide to fully participate in the management of their local affairs.

My Dear Compatriots,

Despite the efforts made by the Government, radical movements, mainly inspired from abroad, have exploited and distorted the corporate demands. They have thus hatched a secessionist plan to partition our country. In this regard, they have formed and financed armed groups that have caused untold harm to the population of the North-West and South-West Regions.

The whole world has witnessed the atrocities committed by these armed groups: maiming, beheading, assassination of elements of the Defence and Security Forces, administrative authorities and defenceless civilians, destruction of public infrastructure and buildings, and burning of schools, hospitals, etc.

I would like to avail myself of this opportunity to once again extend my heartfelt condolences and those of the entire Nation to those who have lost loved ones in the crisis. I also wish to send a message of comfort to the wounded and all those affected in one way or the other. I want to assure them that they can count on the solidarity of the Government of the Republic and the Nation as a whole.

My Dear Compatriots

The atrocities committed by armed groups have forced thousands of our compatriots to seek refuge in other regions of the country and, for some, in neighbouring countries where they have been reduced to living under precarious conditions.

In the face of these intolerable acts, the Defence and Security Forces have taken energetic measures, often at the risk of their lives, to perform their duty of protecting citizens and their property.

These measures are currently bearing fruits with the improvement of security and the progressive resumption of economic activities in the two regions.

My Dear Compatriots,

Since the outbreak of this crisis, I have spared no effort, with the help of Cameroonians of good will, in seeking ways and means for its peaceful resolution.

In a bid to calm the situation, I even ordered the discontinuance of judicial proceedings pending before military tribunals against 289 persons arrested for offences committed during this crisis.

In the same vein, I extended a hand of peace to members of armed groups by calling on them to lay down their arms and benefit from the process of reintegration into society. A National Disarmament, Demobilization and Reintegration Committee was thus set up. Regional Disarmament Centres are gradually receiving many ex-combatants who willingly accept to lay down their arms. We will continue to make the necessary efforts to fully operationalize this process.

At the humanitarian level, I decided to launch a large-scale assistance plan for our affected compatriots of the North-West and South-West Regions. I also established a Centre for the Coordination of Humanitarian Action for its implementation. I wish to thank our international partners for supporting us in this initiative.

My Dear Compatriots,

The supposed feeling of marginalization by the people of the North-West and South-West Regions has often been advanced to justify this crisis. On this score, I wish to remind our compatriots in these regions, but also to those in the other eight regions of Cameroon, that marginalization, exclusion or stigmatization have never guided the work of the various governments I have formed since I became president of our country. Though no human endeavour is perfect and, in a developing country like ours with multiple challenges and limited resources, many needs are still to be met, in all the regions.

With the massive support you gave me during the last presidential election, I intend to work relentlessly, with all the sons and daughters of our country, towards meeting the challenges we are facing in order to improve the welfare of our population, especially in terms of infrastructure, water and electricity supply, healthcare delivery and youth employment.

My Dear Compatriots,

On 4 January this year, I made a vast government reshuffle, particularly with the appointment of a new Prime Minister, Head of Government. As usual, the choice of these officials was mainly guided by their human and professional qualities, their competence and experience. However, I would like to underscore that as faithful as I have always been to the regional balance policy, I chose a Prime Minister who hails from the South-West Region. His predecessor who served in that key position for nearly ten years was from the North-West Region. In fact, since 9 April 1992, Prime Ministers, Heads of Government, have been appointed from among the people of those two regions.

Despite all this, some people will continue to talk of marginalization of the people of these regions. It must be acknowledged that such is human nature and there will never be enough duty posts to satisfy all the regions, divisions, sub-divisions, towns, villages, families and citizens of our country. Any choice that is made will always cause joy whenever one is honoured, and disappointment when one is not.

It is, however, crucial for us to change our mentalities in this regard. Though it is necessary to consider regional balance in new countries with a diverse sociological composition like ours, it should be recalled that ministers and other officials are not appointed to serve only their regions, villages or families, but to serve the entire national community. They must serve the general interest and not specific interests.

That is why since I came to power, I have and will continue to wage a ruthless war against corruption and the embezzlement of public funds, and to promote good governance.

My Dear Compatriots,

Since the outbreak of the crisis in the North-West and South-West Regions, the term dialogue has never been so much talked about, used and even misused.

In and out of the country, people have made proposals and suggestions. Some are realistic while others are clearly less so. There has been a barrage of advice. Some smart, others based on interests. Some people dared to issue injunctions.

There have also been multiple and varied initiatives, most of them made by people of good faith, by countries or organizations that are truly concerned about the future of our country and the well-being of our people. I wish to thank them for their effort and token of friendship.

It is, however, worth noting that the proliferation of such initiatives was sometimes unfortunately based on simplistic and false ideas, born out of secessionist propaganda. Such is the case with the purported marginalization of Anglophones, persecution of the Anglophone minority by the Francophone majority, Government’s refusal to engage in dialogue preferring a military solution to the crisis or even ridiculous accusations of genocide.

Talking about dialogue per se, the issue has always been, with whom?

New information and communication technologies, especially social media networks, have unfortunately facilitated the advent of self-proclaimed leaders, extremists of all shades trying to achieve recognition using insult, threat, hate speech, violence and murder.

However, in no country in the world, has the killing of gendarmes or civilians, kidnapping, mutilation, molestation, burning, destruction of public infrastructure, prevention of children from going to school or people from going about their activities in peace ever been a source of legitimacy to represent or speak on behalf of the people, the very victims of such atrocities.

In democracy, only elections confer such legitimacy.

My Dear Compatriots,

The many consultations I have continued to hold on this crisis have enabled me to size up the strong desire of the people of the North-West and South-West Regions to return to a normal life, to be able once again to safely carry out their economic and social activities, to witness the return of refugees and displaced persons, and to see their children return to school. The Prime Minister’s recent tour of the two regions has helped to confirm this feeling.

I therefore strongly believe that the time has come to rally all well-thinking and constructive forces in our country and in the diaspora to make this desire come true.

That is why I have decided to convene, from the end of this month, a major national dialogue that will, in line with our Constitution, enable us to seek ways and means of meeting the high aspirations of the people of the North-West and South-West Regions, but also of all the other components of our Nation.

The dialogue in question will mainly concern the situation in the North-West and South-West Regions. Since it will focus on issues of national interest such as national unity, national integration and living together, it is obvious that it will not concern only the population of these two regions.

The dialogue will therefore rally all the sons and daughters of our beloved and beautiful country, Cameroon, to reflect on values that are dear to us, namely: peace, security, national unity and progress.

It will also focus on issues that can address the concerns of the population of the North-West and South-West Regions, as well as those of the other regions of our country such as bilingualism, cultural diversity and social cohesion, the reconstruction and development of conflict-affected areas, the return of refugees and displaced persons, the education and judicial system, decentralization and local development, the demobilization and reintegration of ex-combatants, the role of the diaspora in the country’s development, etc.

The dialogue, which will be chaired by the Prime Minister, Head of Government, will bring together a wide range of personalities: parliamentarians, politicians, opinion leaders, intellectuals, economic operators, traditional authorities, religious authorities, members of the diaspora, etc. Representatives of the Defence and Security Forces, armed groups and victims will also be invited.

Obviously, it will not be possible for everybody to effectively participate in this dialogue, but each person will have the opportunity to make a contribution.

Prior to the effective holding of the dialogue, the Prime Minister, Head of Government, will carry out broad-based consultations to solicit a wide range of views that will serve as a source of inspiration for the conduct of deliberations. In the coming days, delegations will also be dispatched to meet the diaspora to enable them to make their contribution to discussions on the resolution of the crisis.

In this regard, I am appealing to the patriotism and sense of responsibility of all our compatriots in the country and in the diaspora so that everyone, wherever they are, should seize this historic opportunity to help to steer our country on the path of peace, harmony, security and progress.

My Dear Compatriots,

The propaganda of secessionists has tried to present the recent court decisions taken against a number of our compatriots in the context of this crisis as an obstacle to the dialogue envisaged.

That is not the case. I also wish to use this opportunity to stress that respect for the rule of law and the fight against impunity are pillars in the consolidation of a State ruled by law to which we all aspire. Violating the rule of law and granting impunity to some citizens is paving the way for anarchy.

It is therefore crucial, at this stage, to dispel rumours that one can quietly loot, rape, burn, kidnap, maim, murder, in the hope that a possible dialogue will erase all these crimes and provide impunity to their perpetrators.

As shown by the experience of many countries in the world, such way of thinking will only encourage the perpetuation of violence in the crisis regions and even encourage it in crisis-free regions.

Admittedly, however, in the context of a dialogue, a peace process or national reconciliation, the possibility of pardon may be considered, under certain conditions.

It is equally true that in accordance with our Constitution, the Head of State is empowered to exercise the right of pardon.

It was, moreover, on the strength of this authority that I made a peace offer to members of armed groups during my recent swearing-in ceremony.

I wish to solemnly reiterate this offer today. Those who voluntarily lay down their arms and place themselves at the disposal of the Disarmament, Demobilization and Reintegration (DDR) Centres have nothing to fear. Their fellow armed group members who are already there can testify to this. Conversely, those who persist in committing criminal acts and violating the laws of the Republic will have to contend with our Defence and Security Forces and will face the full force of those same laws.

The same applies to promoters of hate and violence who, comfortably settled in foreign countries with impunity, continue to incite murder and destruction. Let them know that sooner or later they will have to face justice.

I am appealing to the countries sheltering these extremists to take action against these criminals if they really care about the situation of the people of the North-West and South-West Regions.

Most of them no longer have Cameroonian nationality, but they spend their time raising funds to carry out terrorist acts in Cameroon, masterminding acts of arson, kidnappings and murder, and issuing calls aimed at preventing children from attending school and fellow citizens from going about their business peacefully.

My Dear Compatriots,

The entire national community has high expectations for the dialogue I have just announced and hopes that this will be an opportunity for our brothers and sisters in the North-West and South-West to close this particularly painful chapter, to forget their suffering and to return to normal life. It also hopes that our country will continue resolutely on the path of progress, through fruitful discussions on ways and means of creating conditions conducive to the optimal exploitation of natural resources and our country’s enormous human potential. Therefore, we should all work towards a successful dialogue.

My Dear Compatriots,

Over the years, we have used our linguistic and cultural diversity, the talent of our sons and daughters, and our commendable efforts and sacrifices to build a solid country and a strong Nation. Together we have met many challenges and won uncountable victories. We have proven that united there is no difficulty we cannot overcome and no obstacle we cannot cross. We proved it yesterday. We will prove it again today and tomorrow. The future of our compatriots in the North-West and South-West Regions lies within our Republic.

Cameroon will remain one and indivisible.

Long Live Cameroon!

<https://bamendaonline.net/president-biyas-speech-10-09/>

1. **SDF Calls for Neutral Party to Steer Biya’s Upcoming Dialogue**

*Added by*[**Bamenda Online**](https://bamendaonline.net/author/bamendaonline/)*on September 14, 2019.
Saved under*[**National**](https://bamendaonline.net/category/national-2/)*,*[**News**](https://bamendaonline.net/category/news/) *Tags:*[**Anglophone crisis**](https://bamendaonline.net/tag/anglophone-crisis/)*,*[**Joseph Dion Ngute**](https://bamendaonline.net/tag/joseph-dion-ngute/)*,*[**national dialogue**](https://bamendaonline.net/tag/national-dialogue/)*,*[**Paul Biya**](https://bamendaonline.net/tag/paul-biya/)*,*[**SDF**](https://bamendaonline.net/tag/sdf/)

A roadblock with placards during streets protest decrying Anglophone marginilization 2016

The Social Democratic Front, Cameroon’s leading opposition
party has proposed that the upcoming National Inclusive Dialogue called by
President Paul Biya be chaired by a neutral party. This is one of several
proposals the party gave the Prime Minister to channel to the Head of State
following consultative talks on Thursday.

The delegation led by 
Hon. Joshua Osih also asked for the dialogue to address the root cause of
the Anglophone problem, create openings to discussed the form of the state and
for the military not to be part of it amongst others.

The SDF further calls for the government to create an enabling environment for the dialogue to hold by declaring a cease fire and granting a general amnesty to all implicated in the conflict so as to permit all stakeholders to participate. (**Find attached the SDF Press release**)

[SDF Press ReleaseDownload](https://bamendaonline.net/wp-content/uploads/2019/09/press-release-SDF.pdf)

President Paul Biya in a rare televised outing on September
10, 2019 announced the convening of a major National dialogue without exclusion
as part of the solution to the crisis rocking the Northwest and Southwest
regions of the country.

This opened the way for consultative talks chaired by the
PM, Dion Ngute ahead of the All Inclusive National Dialogue to hold at the end of
this month.

<https://bamendaonline.net/sdf-calls-for-neutral-party-to-steer-biyas-upcoming-dialogue/>

1. **PA TASSANG RESPOND TO THE DISCLAIMER LETTER**

*Added by*[**Bamenda Online**](https://bamendaonline.net/author/bamendaonline/)*on March 2, 2020.
Saved under*[**opinion**](https://bamendaonline.net/category/opinion/opinion-opinion/)*,*[**National**](https://bamendaonline.net/category/national-2/) *Tags:*[**ambazonia**](https://bamendaonline.net/tag/ambazonia/)*,*[**Tassang Wilfred**](https://bamendaonline.net/tag/tassang-wilfred/)

PA TASSANG RESPOND TO THE DISCLAIMER LETTER
Nonconformism: Controversy Is My Name*
(Truth at War with Falsehood)

Tassang Wilfred

Deacon TASSANG Wilfred
26/02/2020

Dear Ambazonia,
When I wrote to denounce Kamto and warn Ambazonia against his wiles, I little imagined that it was going to raise so much controversy and attract this much attention. Am I worried? Not the least. If anything, this will unite the struggle as it has acted as precursor to the unearthing of evil most viciously hidden.

I was never brought up to shy away from controversies; not at home, not in school and certainly not in my new love with Jesus the Christ.
Romans 12:2
And be not conformed to this world: but be ye transformed by the renewing of your mind, that ye may prove what is that good, and acceptable, and perfect, will of God. If the whole world chooses to lie, I will not, because I will not conform to evil. I am in fact having the season of my life since our abduction because at last, falsehood that had been so carefully hidden under a pretentious façade is being exposed.
I confess my love for you, Ambazonia. And what is it about my love for you?
1Cor.13:6 Love is not happy with evil, but is happy with the truth. GNB
The truth is so very Central to this liberation struggle. No Truth, no justice, no liberation. I’ll die for it.

I am sorry for sermonising. In this note, I will by the grace of God, denounce the falsehoods that have once more been declared in the wake of the Kamto denunciation. The very first one is contained in a note by someone reacting to Bro. Xmas Ebini’s reaction to the Disclaimer. See it attached and highlighted here below. I’ll take it along with another by my fellow inmate Kisob Bertin, who also goes by the pseudonyms; Pastor Amba, and General Chop No Die.

Perhaps I should open up to you a little!! The US embassy sent an official recently to meet our jailed leaders and to inform them of the American position on the crisis in Southern Cameroons!! Immediately the official said, we have asked Yaounde to discuss with your leader Sisiku Ayuk Tabe!! Tasang interrupted the speaker and shouted that they should negotiate instead with the leaders in the USA and cited Sako and Chris!! Put yourself in their place Seseskou Ebini, will you continue to keep someone like that around?

In the note above that ends with a very visible threat to my life, (not that it matters) the author who is by all means a friend of Nera10-1, affirms that I, Tassang Wilfred rudely interrupted a US diplomat that visited us in jail as you can see above, etc etc. In Kisob’s diatribe, he says Batonier Akere Muna was the one who visited. I think it will be a sin against Ambazonia and my God if this particular matter is not addressed forthwith.

Let it be made abundantly clear that no US diplomat has visited us. Our only contacts with diplomats, US and others, has been in court. So, there is no way that I could ever have rudely interrupted somebody who didn’t come. Or could I?

On the other hand, Batonier Akere Muna did come, with two junior colleagues from Muna and Muna. Before I proceed, I will disappoint many to say here that I respect the Munas a great deal, and Batonier Akere in particular, my differences with him concerning Ambazonia notwithstanding. And this is why; during the preparations leading up to the trial of us Nera 10, Barrister Akere gave the only position that should have been ours, but it was put aside by Barrister Shufai who claimed he had a water tight strategy. Akere said with authority that we should not submit ourselves to the Military tribunal. According to the learned man of Law, Yaoundé had violated international Law and therefore should not try us. He said the court will try and sentence us in abstentia but it will be of nil effect. I thought it made sense, but it didn’t to learned Shufai Barrister Berinyuy B. We went to court and when Shufai’s strategy was put to the test, it was Akere Muna who came to the rescue. On the question of our identify following our declaration that we were Ambazonians, and not Camerounese, and when the court began presenting our identification papers, and passports, it was Akere who came to the rescue. The genius at Law sprang up and with brilliance, argued that passports and National Identity Cards were not proof of nationality, stating that by Camerounese Law, nationality is conferred by only one document; the cirtificate of nationality. He further stated that the latter certificate is valid for 03months only. He challenged the court to produce same, valid, to no avail. See why I respect the gentleman? But that is as far as it goes.

I can’t say that the Batonier merited the same esteem at all when he visited us on January 28 2020, even if I was in no way disrespectful of him. And what brought the Batonier? He was his own envoy and came to brief us on his efforts among African Heads of States (former) to bring about some form of forum on Cameroun. He did start by trying to insinuate that some diplomats in Yaoundé were looking up to those of us in jail. This greatly elated my brothers who want to be seen as the only legitimate leaders of the struggle. But, dear people, I saw further into the game plan. Batonier Akere badly wanted approval from Kondengui IG to achieve his project, and to my humble judgment, that plan was anti-restoration. I was about one of the last persons to react and I told our brother without mincing words that his project won’t fly. I advanced the following reasons:

1. I told him that the Southern Cameroons question was beyond Africa and the AU. I reminded him of the 2002 Banjul ruling which ruling was endorsed by the AU heads of States. What have they done about it? The AU cannot execute its own resolution. Moreso, since the conflict started, the AU has not made an objective statement on it. Why will we then trust the African Forum working under the auspices of the AU?
2. Secondly, I objected because the agenda of that forum is Cameroun and not the restoration struggle. According to Batonier Akere Muna, there would be *500 participants with 50 coming from each of the 10 regions. Another 1972 referendum? It came out clearly that the expected outcome was to be some transition government with Paul Biya at the helm. How will such a forum address Ambazonia?
3. On the third ground, I objected because he said they were negotiating for the Nera 10 to be given safe passage from Yaoundé to the Conference and back to jail. Yours truly, I told our brother with acid in my voice that it was not to be contemplated. We won’t attend a conference knowing that we would return to jail if we didn’t yield. Now that my brothers have an issue with my position, let them go; the son of my father will not.
4. With regards to my referring him to Sako and Chris, that is what you’d call a *half truth. But since no half truths exist, it is simply put, a lie. I did let Akere know that he was addressing the wrong audience. I referred him to President Sako whom he almost derided trying to pamper my brothers, and to Yerima, and Ayaba. Yes, I mentioned this three names.

For you who are angry that I listed Yerima, I did on purpose. I don’t know the man, but I long came to terms with reality; the split. I also know that those members of the KIG are there because they mean well for Ambazonia, and more importantly because they have not been told the truth. When that truth is exposed as it now is in the process of, shall they not all turn their backs on falsehood?

***About the CIA investigating Sako. Come on. Even in a nightmare, Batonier Akere will not say a thing like that. Who doesn’t know what Langley does?***

Now, only Nera 10 members were allowed in the meeting though Muna and Muna wanted to talk to all of us. Kisob Bertin was not part of that meeting therefore. It follows that those who disclaimed the Kamto denunciation have arranged for him to churn all these lies. Am not new to Kondengui. Is it not the same Kisob/Pastor Ambe who declared with their blessings that Nera 10 leaders had been poisoned and that President AyukTabe and 02 others had collapsed. And have they not filed a suit in court on this account as well? Shameful!
And have I not made reference freely to my brother the Batonier? Let even my father Pa Nfor disclaim me, this is theTRUTH.

I will also make allusion to a document I have learnt Shufai Barrister Berinyuy B. sent out, in which document he States that I, Pa Tassang Wilfred am their Press Secretary. Nothing can be further from the truth. Press Secretaries issue Press statements on behalf. Can he show me one that I issued? I did work with the Press Officer of our case, Barrister Amungwa, pushing and helping him to ventilate the struggle. Does that make me their Press Secretary? When Sisiku set up a team to provide answers to Jeune Afrique’s questions, was I part of the team? Now, they have another from “Le Messaged”.Ambazonia, should I not instead of denouncing Kamto have denounced Nera 10-1 first?

Let me however thank Shufai for bringing clarity into our meetings with Kamto et Al. There were in fact 03 members in our team, not four as I said. Does this specification make Kamto not to be a liar? Shufai even went ahead to state that I was appointed to be in that delegation but I turned it down. For exactitude, let it also be known that Pa Nfor also refused to be part of that discussion because both of us were opposed to it.

However, since His Majesty Shufai mentioned this as though to contradict me, I’d have loved for him to tell Ambazonians the reasons I advanced. Can he? I told my brothers to keep a safe distance from those men. I reminded them of Kamto’s wit and his track record as listed in the controversial denunciation. I also let them know that the Kamto team would size us up and get facts which he would use against us subsequently. Even this wouldn’t fly with my brothers. Matter was put to vote and Pa Nfor and I lost. They went. Now, it has become anathema to say that a man who lied in Paris concerning us is a liar. Class, how do you call a man who lies? Answer!

**KAMTO LIES AGAIN**

Now it turned out that they were contacted by the CRM to issue that statement to satisfy the professor. This as you all now know, was told us in all innocence by Dr Ogok Ntui Egbe-Ngu. Is it not now clear how much rapprochement there is between Nera10-1 and Kamto?

To make matters worse, the same Kamto they are trying so had to defend and protect lied even to them. Are my brothers under a spell? The Disclaimer, Pa Nfor told me, was supposed to be confidential, yet it is out there. Is Prof. Kamto anything but a liar? Oh God! Help us.

**LRC 2018 Presidentials**

During the 2018 presidential election campaigns, the media wanted to know from the CRM candidate, Maurice Kamt how he intended to solve the “Anglophone problem if elected.” Several times, the Professor replied that the matter was left to the Cameroonian people, that he would handle it once he is president. Give me a break. Kamto was the only candidate in that election who didn’t have the war in Ambazonia as a worry. This politician is extraterrestial.

Just so I don’t sound insulting, I’ll overlook the tribal insinuation as well as the basic English confusion on who is fortunate and who isn’t.

**Attempt to Compromise**

A couple of weeks after the Kamto team left Kondengui, his party’s Secretary General, accompanied by a much older person and another, younger, paid us a visit in Kondengui. The older person we recognised as elder brother to one of Kamto’s allies who was in prison with us, for he came often. The younger gentleman introduced himself to me as one of a delegation that members of the Consortium received in Bamenda in January 2017. Prof. Uphie Chinje and Minister Fru Calixtus Gentry were others. These gentlemen were received by Sisiku Julius AyukTabe and Prof CA Awasum on our behalf. It was on a Sunday and because of this, we were only briefed on the visit the next morning after meditation. The old gentleman we were told, said he was a close friend of President Biya and so proposed himself to meditate between us and Paul Biya. Sisiku informed us that the man wanted us to write a letter of apology to Paul Biya in exchange of our release. That we refused to write that letter is not the issue. Matter is, I don’t know why this stroke me as odd and does not strike my brothers; that Kamto’s Secretary General would bring someone to us whose mission was to torpedoe the struggle. I don’t know whether you get my drift. I tremble even as I write this.

**On Disclaimers**

Before I end, let me note here that my Nera brothers have not written a disclaimer against the lies Kisob proclaimed about the meeting we had with Batonier Akere Muna which means they approve.

When I isolated myself from my brothers of Nera Hotel fame in May 2019, it was because I believed that their action was not only treacherous, but was treasonable. In disclaiming a note that had nothing to do with their persons in anyway, am sure my brothers also believed I had committed treason, or at the least, acted treacherously. Question is; against who? I don’t mind them coming out again to denounce this note, or deny the contents thereof.
It would however have made more sense if these defenders of the truth had started by disclaiming the wicked publication from Kisob Bertin alias Pastor Ambe which put Ambazonia into panic. They didn’t. Is it therefore true that we were poisoned and that Sisiku and two other Nera 10 members collapsed? Didn’t they keep quiet because it suited their purpose? Or was it not a lie enough to warrant denunciation? Seems like a lie is whatever doesn’t suit their darker purpose. Hmmm.

My Nera 09 brothers are enraged because I am supposed to have stopped eating from the common table on account of the threat to my life from one of them or theirs (See note highlighted here above). Wouldn’t it have been normal for these experts in disclaimers to have distanced themselves from this note to Xmas Ebini. How on Earth can these men be angry that I fear for my life? Was their earlier crime that let to two governments not reason enough to have warranted my not eating with them? Now, I am furious, and terribly enraged myself. Can someone tell my brothers that they have many things to disclaim and some in arrears?

These are interesting times. The only thing I can say is that we pray even harder this Lent season. I believe very firmly that order is returning to the struggle. Ambazonia should get ready to forgive each other after the truth is revealed. We are closer more than ever before.

<https://bamendaonline.net/tassang-respond-to-disclaimer-letter/>

1. **Covid-19, Why Separatist Fighters Should Drop Their Guns**

*Added by*[**Bamenda Online**](https://bamendaonline.net/author/bamendaonline/)*on April 18, 2020.
Saved under*[**News**](https://bamendaonline.net/category/news/)*,*[**opinion**](https://bamendaonline.net/category/opinion/opinion-opinion/) *Tags:*[**Anglophone crisis**](https://bamendaonline.net/tag/anglophone-crisis/)*,*[**covid-19**](https://bamendaonline.net/tag/covid-19/)*,*[**Nji Nelson**](https://bamendaonline.net/tag/nji-nelson/)

Tens of armed factions operate in the NW and SW regions

The outbreak of the Covid-19 pandemic has kept the world on a standstill for over a month now. The pandemic has brought world powers to their knees. Tens of thousands have perished with some of the most developed nations like USA, Italy, Spain, France and Britain bearing the brunt.

Coronavirus has become the talking point on all international, national and local news and on the lips of every living being. Countries that were plagued by wars, civil conflicts, surging crime waves have suddenly gone comatose with everyone tilting their attention towards Covid-19. Think of Syria, Yemen, Afghanistan, Mali, Nigeria and South Sudan just to name a few.

In Cameroon’s two English speaking regions, the North West and South West regions, the case isn’t the same. Despite calls from the UN Secretary General, Antonio Guterres for separatist fighters to drop their weapons and give chance for a cordinated response against the virus, many seems to be taking it for granted.

Factions of some armed groups in the anglophone conflict have even called for and are observing a cease fire. But fingers are now pointing at such groups as “blacklegs” to their “struggle”.

At the time of this report, Cameroon had over 900 confirmed cases of the Covid-19 and the number keeps increasing as the days go by.

With a looming public health crisis, its time enough for separatist fighters in bushes to drop their weapons and save themselves from catching the dreaded the virus. With the rate at which the virus is spreading, just one infection amongst the fighters in their hideouts could lead to a disaster, including near by community and subsequently the whole region and beyond.

For the sake of their health and those in the community in which they find themselves in, it’s time to leave the bushes and join efforts to kick the virus out of our communities.

The rainy season is now here and the health risks that comes with staying in the bush cannot be overemphasized. There are fears cases of malaria, typhoid etc could double. This could pose a serious health risk to the people in the areas they operate. Beside there are no health facilities in this areas which are fully operational due to the fighting.

Maybe it’s time for the fighters to rethink and come up with solutions if not at least a ceasefire. In the face of every major life threatening problem that confronts mankind’s very existence, humanity has always put aside differences to come tawards a common front against such obstacle. This is what has guaranteed our existence since the days of the neanderthals and should not be otherwise now. Even bitter enemies over the fault line in Yemen seem to understand this. Why not our separatist fighters and who says not, our defense forces for a life saving truce.

By Nji Nelson Chefor

<https://bamendaonline.net/why-separatists-fighters-should-drop-their-guns/>

1. **“Mafors” Call For Return To Peace In NW and SW Regions**

*Added by*[**Bamenda Online**](https://bamendaonline.net/author/bamendaonline/)*on December 25, 2020.
Saved under*[**News**](https://bamendaonline.net/category/news/)*,*[**Northwest**](https://bamendaonline.net/category/northwest/) *Tags:*[**Anglophone crisis**](https://bamendaonline.net/tag/anglophone-crisis/)*,*[**Mafors**](https://bamendaonline.net/tag/mafors/)*,*[**Northwest**](https://bamendaonline.net/tag/northwest/)

“We the Queen Mothers (Mafors) of the North West region deplore and condemn in the strongest terms the constant killing of our children since the escalation of the crisis in our beloved anglophone regions” read a statement presented by Judith Yah Achidi (General Manager of CAMTEL).

The Queen Mothers rallied at the Bamenda Ceremonial Ground Commercial Avenue on Thursday December 24, 2020 to denounce the rampant and senseless killings that has become a common feature in the crisis.

“Last December 13, HRH Chief Ngala Ikome of Dibanda in Fako Subdivision…was gruesomely killed in captivity” the statement continued, further citing other cases like in Ngarbu, the killing of Comfort Tamusang in Muyuka, Florence Ayafor in Santa and the assassination of students in Kumba on October 24th amongst many unreported killings.

The women carried placards denouncing the killings

The Mafors said their coming together was “to mourn and express” their “indignation and deep pain and to say never again,”

The Mafors she continued “yearn for peace. Drop the guns and stop the violence.
As queen mothers we don’t know discrimination. We are mothers and are bound to protect the lives of our offspring.
Our offspring have been dying in their numbers because of this violence and we come to cry that the killings should stop.”

Other women at the event carried placards with different massages.

“We are tired of mourning, We need pens not bullets, Our children deserve the right to education, Stop the killings, We want peace” read some of the messages.

The women pleaded with the belligerents to drop their guns and for peace to return to the region as before. The crisis according some UN estimates has claimed over 3000 lives with hundred of thousand internally displaced with others in Nigeria as refugees.

By Abongwa Fozo

<https://bamendaonline.net/mafors-called-for-return-of-peace/>

1. **NCPBM Crusades Against Hate Speech and Xenophobia**

*Added by*[**Bamenda Online**](https://bamendaonline.net/author/bamendaonline/)*on June 20, 2021.
Saved under*[**News**](https://bamendaonline.net/category/news/)*,*[**Northwest**](https://bamendaonline.net/category/northwest/) *Tags:*[**Bar. Nico Halle**](https://bamendaonline.net/tag/bar-nico-halle/)*,*[**David Abouem a Tchoyi**](https://bamendaonline.net/tag/david-abouem-a-tchoyi/)*,*[**NCPBM**](https://bamendaonline.net/tag/ncpbm/)*,*[**Peter Mafany Musonge**](https://bamendaonline.net/tag/peter-mafany-musonge/)

The National Commission for the Promotion of Bilingualism and Multiculturalism –NCPBM has been holding regional campaigns against “Hate Speech and xenophobia” as a way of promoting living together and national peace in Cameroon.

Held in Bamenda from the 15-18 of June, former Northwest Governor Abouem A Tchoyi David and Barrister Nico Halle, members of the NCPBM meet with various peace stakeholders in the region from local administrators, security officials, journalists, traditional and religious leaders, the media, telecommunication companies, youths and women leaders, the civil society, lawyers and more.

*Mr. Abouem A Tchoyi and Bar. Nico Halle in the context of their mission described hate speech and zenophobia as “language that insights hatred, contempt, on the basis of people’s origin, gender, religion, age, political affiliation or social condition. It can also be injustice, discrimination or disrespect of people’s rights or reputation that causes frustration and want for revenge, while xenophobia is dislike of, or prejudice against people from other ethnic groups, or region, or against the indigenes by the settlers”.*

Hate Speech according to bar. Nico Halle emanates from frustration when people are maginalised, stigmatized, considered irrelevant and deprived of what is theirs. “You cannot get any kind words from such people. People who are poor, unemployed, trampled upon because of tribalism, Nepotism, and exclusion” he said “ tend to be sad and frustrated”.

The campaign clearly identified that in the current socio-political crisis in the Northwest and Southwest regions, “hate Speech” has been the fuel stoking the flames in the crisis for the past five years which has led to loss of lives and property, massive displacement of people, lack of Jobs, good roads, constant blackouts, maginalisation, too many security check points and police harassment around town, lack of youthful representation at top government positions in the country, illiteracy, neglect of the entertainment sector, lack of football Stadia and training pitches, neglect of the English language by government and military forces amongst many others.

Speakers after speakers at the three day mini-conference expressed and shared different ways hate speech and xenophobia manifest amongst the general population.

The neglect of the Bamenda-Babajou Road, the demolition and abandoned roads within Bamenda town, the selection rather than election of local leaders, the appropriation of power over land by administrators over traditional authorities, neglect of the youths, unemployment, abuse of power by security officials were singled out as some of the high instances of hate speech and xenophobia against the people of Bamenda and the Northwest region as a whole.

Paul Achombong, Bamenda City Mayor   after taking time to explain the difficulties with the ongoing road works in Bamenda pleaded with the representative of the NCPBM to sincerely convey the worries of the Bamenda man to the head of state and warned that if the roads that have been abandoned are not done soon, it could spark another wave of Anglophone protest which would be worse than the current Ambazonia crisis.

Members at the meeting with NCPBM members

Some of the recommendation taken and which the NCPBM members promised to channeled to the Head of State included; the military should go about their Job professionally without interfering in the activities of civilians and transporters, the press and civil society organizations should be empowered with amenities to run more campaigns against hate speech and xenophobia, name callings should stop to give way to genuine dialogue, anti hate Speech clubs be created in schools, leisure centers like stadia, cultural centers be created, the entertainment sector should be highly promoted because in the midst of all the stress people still need leisure activities to keep them away from propagating  hate speech. They also recommended that moral education be incorporated into the schools with religion studies considered as a passed Subject, young people should be appointed post of responsibility amongst others.

Round up the campaign in Bamenda, Bar. Nico Halle said “Having identified the root causes, we have to build a foundation of love, Justice, equity, transparency, integrity, patriotism and the fear of the Lord because if there is no love, no good thing can happen to a people. Time for Frustration, hypocrisy, Falsehood and lies telling is over. Let’s all sink  aside our differences and endeavor that this cankerworm that has destroyed the very fabric of our nation be fought and killed because Cameroon has all it takes for all Cameroonians to be Happy due to its rich and huge natural resources and also because  the average Cameroonian is very intelligent, God fearing and law abiding.

Don’t be a victim to stigmatization, marginalization, don’t sit on the fence asking what Cameroon has done for you but step down and save your motherland from the hands of Intruders and detractors, so hate speech and xenophobia can be eradicated from our region and country at large”

The campaign against “Hate Speech and Xenophobia” called for by the Head of State Paul Biya started in March with events held in Yaoundé by the head of the NCPBM Peter Mafany with frontline partners in the fight against hate speech. Different commission members have been touring the other regions for similar exercises.

By Anyam Yvette and Abongwa Fozo

<https://bamendaonline.net/ncpbm-crusades-against-hate-speech-and-xenophobia/>

1. **Calm Finally Returns to Bamenda**

*Added by*[**Bamenda Online**](https://bamendaonline.net/author/bamendaonline/)*on November 24, 2016.
Saved under*[**National**](https://bamendaonline.net/category/national-2/)*,*[**News**](https://bamendaonline.net/category/news/) *Tags:*[**Bamenda**](https://bamendaonline.net/tag/bamenda/)*,*[**lawyers' strike**](https://bamendaonline.net/tag/lawyers-strike/)*,*[**layers**](https://bamendaonline.net/tag/layers/)*,*[**lele lafrique**](https://bamendaonline.net/tag/lele-lafrique/)*,*[**ni john fru ndi**](https://bamendaonline.net/tag/ni-john-fru-ndi/)*,*[**Nov. 21 strike**](https://bamendaonline.net/tag/nov-21-strike/)*,*[**strike**](https://bamendaonline.net/tag/strike/)

Bamenda today, Thursday November 24,  woke up timidly but quickly regained some of its usual life pattern with commuters crisscrossing the town to get to their job sides, taximen and commercial bike riders (Benskin) honking as they scramble for passengers, some traders opening their shops, the markets gradually opening up, though the familiar sight of infants, pupils and students tussling for passage, cabs and bike to get to school was evidently lacking, and unusually present were heavily armed police men in riot gear and water cannons waving their automatic weapons and tear gas forebodingly to the passing public att some major junctions and streets.

This could have been a result of the charmed offensive by the Governor of the region who descended down to some popular neighbourhoods in town to commune with the population, sharing a drink and soft words with some residents of Mile II Nkwen, Hospital Round About and Bali Park amongst others. He assured the population that only one person was killed and investigations have been launched to that effect, he called for dialogue, peace and understanding and that government has initiated moves to dialogue with teachers and lawyers.

It could also have been due to the call of some religious and political leaders. The Right Rev. Fonki Samuel, moderator of the PCC and Cornilius Fontem Essua, Arch Bishop of Bamenda appealed to the youths to leave the streets, shun violence, protect Bamenda and engage in dialogue while SDF National Chairman, Ni John Fru Ndi called for calm and indicted government to listen to the cries of the masses.

Maybe, they heeded to the call of the supposedly protest leader, Mancho Bibisy who called for calm and for the youths to retreat from the streets of Bamenda to avoid further bloodshed while the fight is carried to other parts of Anglophone Cameroon in a message wildly circulated on whatapps.

Or maybe, three days of running battles between the police and the youths had taken its toll on all, food supplies were running low, cash was becoming rare, and there were several injured cases due to the strike.

Whatever the case, it’s a huge sigh of relief to the government and some city dwellers that the stink has been taken away from the strike and life is gradually returning to normal. Many opinion hold that the strike should had remained one of defiance to the Yaoundé regime and not violent as it turn out to be. Still, the Lawyers and teachers continued with their sit down strike while the authorities look for a durable solution to the crisis, yes the Anglophone crisis.

By Abongwa Fozo

<https://bamendaonline.net/calm-finally-returns-to-bamenda/>

1. **Journalists’ Union Condemns Peter Essoka And NCC**

*Added by*[**Bamenda Online**](https://bamendaonline.net/author/bamendaonline/)*on January 23, 2017.
Saved under*[**National**](https://bamendaonline.net/category/national-2/)*,*[**News**](https://bamendaonline.net/category/news/) *Tags:*[**Anglophone crisis**](https://bamendaonline.net/tag/anglophone-crisis/)*,*[**censorship**](https://bamendaonline.net/tag/censorship/)*,*[**NCC**](https://bamendaonline.net/tag/ncc/)*,*[**Peter Essoka**](https://bamendaonline.net/tag/peter-essoka/)*,*[**SNJC**](https://bamendaonline.net/tag/snjc/)

The Cameroon National Journalists’ Union known by its French acronym as SNJC has issued a strongly worded statement calling on its members (mostly French speaking journalists) to give a fair and equitable room to all opinions express by Cameroonians on the Anglophone crisis, federalism and secession. Below is the translated version (by Bamenda Online) of the statement.

“The National Union of Cameroon Journalists  condemns in strong terms the decision of the National Communication Council  against the media on the Anglophone crisis in the country.

On January 20, 2017, the president of the National Communication Council (NCC), Peter Essoka, read a statement on CRTV, warning media houses about how they treat the current crisis in Northwest and South-West Regions. Among other things, the communiqué prohibits the media organs from addressing issues related to federalism and secession.

The outing of the president of the NCC comes after several measures have been taken to restrict  freedoms of expression, in particular the suspension of the Internet in the Northwest and the Southwest regions.

The National Union of Cameroon Journalists calls on all media houses and journalists to disregard the injunctions of Mr Peter Essoka, once again condemns the cynicism of the NCC, and to consider the injunctions as null and void and of no effect. The SNJC invites the Cameroon media and journalists to give a fair and equitable airspace to all the opinions expressed by Cameroonian citizens on the issues of federalism and secession.

The SNCC notes that the NCC and its president are no longer hiding to defend and implement the censorship imposed by the regime that subsidizes them.

The SNJC reserves the right to retaliatory actions against Peter Essoka, the NCC and the government they serve.

SNJC asks the Fédipresse and the other media promoters to clarify their positions on the professional existence and legitimacy of the NCC.

Done at Douala on 21 January 2017

Denis Nkwebo

President of the SNJC”

<https://bamendaonline.net/journalists-union-condemn-peter-essoka-and-ncc/>

1. **Another Ghost Town Frustrates Government’s Planned Reopening**

*Added by*[**Bamenda Online**](https://bamendaonline.net/author/bamendaonline/)*on February 6, 2017.
Saved under*[**News**](https://bamendaonline.net/category/news/)*,*[**Northwest**](https://bamendaonline.net/category/northwest/)*,*[**Uncategorized**](https://bamendaonline.net/category/uncategorized/) *Tags:*[**anglophone Cameroon**](https://bamendaonline.net/tag/anglophone-cameroon/)*,*[**Anglophone crisis**](https://bamendaonline.net/tag/anglophone-crisis/)*,*[**anglophone education**](https://bamendaonline.net/tag/anglophone-education/)*,*[**anglophones**](https://bamendaonline.net/tag/anglophones/)*,*[**Cameroon Anglohone Consortium**](https://bamendaonline.net/tag/cameroon-anglohone-consortium/)*,*[**Ghost town**](https://bamendaonline.net/tag/ghost-town/)

The government of Cameroon and the administration of the Northwest and Southwest regions have seen another desperate attempt to have schools reopen in Anglophone Cameroon perturbed by the annoying ghost towns that have rendered them helpless in the front of a national crisis.

Northwest Governor, Adolph Lele Lafrique was on the brink of becoming a hero for the regime, for having succeeded where the Prime Minister, the ministers of Higher Education, Secondary and Basic, and the Paul Ghogomou’s Commission had failed by having the Anglophone Teachers’ signed a communiqué calling off the strike action they initiated since November 21, 2016.

He had succeeded to have the Baptist Teachers Trade Union, the Presbyterian Education Authority Teachers’ Union, The Teachers’ Association of Cameroon and Cameroon Teachers’ Trade Union signed a document calling off the strike which was proudly presented over CRTV as a panacea to the Anglophone crisis, and the full resumption of classes for the second term.

Southwest governor Okalia Bilia even went further calling on all to put hands on decks for a successful celebration of the upcoming Youth Day as a show of national unity. But to their utter dismay, the ghost came visiting on Monday February 6 once more. His counterpart of the Northwest drove down to Nkambe to ensure a smooth resumption but was greeted by a ghost town.

Back in Bamenda, unidentified individuals burned down the administrative block of GBHS Nitop, the school Bus of GBHS Nitop was set ablaze and a day before,  a car belonging to the Principal of GHBS Bamendakwe was also torched.

The streets of Bamenda, Kumbo, Nkambe, Ndu, Jakiri, Bali, Bafut and many other towns and villages remained shut as another ghost town called by the disbanded All Anglophone Civil Society Consortium. The government now looks helpless in the face of this crisis. The local administrators, mayors, fons, ardos, and school authorities are bearing the pressure now. Northwest Governor while on his way to Nkambe today forced the Mayor of Ndu and some local fons to make sure the traders open their shops and children are sent to schools, probably hoping another Ekeme Patrick amy emerge in the Northwest.

A few individuals spoken to by Bamenda online after the teachers’ trade union representatives signed the agreement show that there was total discontent in the general population who felt that the grievances of the teachers which cut across the entire Anglophone community have not been addressed in any way and there was no need to call off the strike. Others strongly hold that the teachers’ representatives must have been coerced into signing the document.  Many others say they would not send their kids to school no matter the decision of the teachers.

But some teachers and lawyers we spoke too said it was a good thing the teachers signed the document as it takes the pressure off the teachers who can now rest from arbitrary arrest and detention, kidnapping and false accusations, and are no longer being seen as the ones holding the resumption of classes. They say this would act as sufficient indication to Yaoundé that the Anglophones felt marginalized and there is an urgent need for dialogue and not intimidations and arrest and abduction of Anglophones expressing their wish for a federal system of governance.

So far from every indication, the government seems less concern about the plight of Anglophone children who have not gone to school for over two months by refusing to negotiate or come to terms with some of the resolutions arrived at during the inter-ministerial commission meeting in Bamenda but is more concern about the holding of the 2017 National Youth Day on February 11, an act many Anglophones considered as a slap in the face of their history with la Republique.

The All Anglophone Civil Society Consortium has called for more ghost towns on Friday and Saturday 10 and 11 February 2017. It’s clear what move the government would take next. Romours abound that the government intends to ferry in youths from other parts of the country to march pass on 11 February in major Anglophone towns. This has been laid credence by the fact that several hostels in Bafoussam have been booked from this midweek in anticipation for an unannounced even. A friend of mine moved into Bafoussam for some research work but was forced to book a more expensive hotel as he said the cheaper ones have all been booked as from Wednesday.

<https://bamendaonline.net/another-ghost-town-frustrates-government-planned-reopening/>

1. **Hon. Wirba Skips Opening of 2017 Legislative Year**

*Added by*[**Bamenda Online**](https://bamendaonline.net/author/bamendaonline/)*on March 14, 2017.
Saved under*[**National**](https://bamendaonline.net/category/national-2/)*,*[**News**](https://bamendaonline.net/category/news/) *Tags:*[**Anglophone crisis**](https://bamendaonline.net/tag/anglophone-crisis/)*,*[**Hon. Joseph Wirba**](https://bamendaonline.net/tag/hon-joseph-wirba/)*,*[**national assembly**](https://bamendaonline.net/tag/national-assembly/)*,*[**SDF**](https://bamendaonline.net/tag/sdf/)

Hon. Joseph Wirba of Bui South Constituency was the most notable name on the list of MPs who failed to turn up for the opening session of the 2017 legislative year in Cameroon, that took place at the National Assembly, Monday morning, March 13, 2017.

Hon.  Joseph Wirba captured the attention of the world and the hearts of Anglophone Cameroonians in December 2016 during the 3rd session of parliament where he took to the rostrum to vehemently defied and accused the Yaounde regime  and its forces of atrocities against Anglophones students and the general population and of systemic policies of marginalization of the Anglophones in the Cameroon union.

 His speech in that session (“I injustice becomes law, resistance becomes a duty”) has been credited in many quarters for inspiring the Anglophone struggle today by uniting the entire Anglophone community behind the teachers’ and lawyers’ strike that has since brought the two Anglophone regions into a standstill with a general civil disobedience movement against the authorities in Yaoundé.

Hon. Wirba’s presence at this session of parliament was highly anticipated by all for various reasons. There were romours before this session that his parliamentary immunity would be uplifted to pave the way for his arrest for inciting and promoting the Anglophone crisis. This was considered so because Mancho Bibixy, Dr Fontem Niba and Barrister Nkongo Bella and scores of other Anglophones have been arrested and transferred to Yaoundé since he made that speech.

The vice president of the National Assembly, Hon. Mbah Ndam Joseph and member of the SDF party to which Hon. Wirba belonged to in an interview with Cameroon-info.net said he was was simply absent from the opening session like other MPs.

Hon. Joseph Wirba has not been seen in public since his last outing in a rally in Kumbo on January 14, 2017 and the arrest of the consortium leaders a few days after the Kumbo rally that was also attended by Mancho Bibixy. His whereabouts remains uncertain, with some sources hinting that he has escaped to Nigeria and others saying to the United States.

By Abongwa Fozo

<https://bamendaonline.net/hon-wirba-skips-opening-of-2017-legislative-year/>

1. **Hidden Hands Suspected Behind Bamenda Food Market Fire (important)**

*Added by*[**Bamenda Online**](https://bamendaonline.net/author/bamendaonline/)*on March 20, 2017.
Saved under*[**Human Interest**](https://bamendaonline.net/category/society/human-interest/)*,*[**News**](https://bamendaonline.net/category/news/) *Tags:*[**Anglophone crisis**](https://bamendaonline.net/tag/anglophone-crisis/)*,*[**Bamenda**](https://bamendaonline.net/tag/bamenda/)*,*[**Bamenda Food Market**](https://bamendaonline.net/tag/bamenda-food-market/)*,*[**fire accident**](https://bamendaonline.net/tag/fire-accident/)

Tongues continue to wag in silence as to who could have been behind the fire disaster in Bamenda that engulfed over 40 makeshift and 10 lockup sheds in the Bamenda Food Market last Tuesday March 13, 2017.

Despite some blind arrests made the following day, the police have not been able to shed more lights about the incident, leaving several conspiracy theories to fill the already rumour festive town of Bamenda and the Northwest region. A day after the fire disaster, the police were very prompt to react to a call by some roadside sellers and informants that they were being prevented from selling by the Market Master.

Anu Kenneth the Market Master and five others were promptly rounded up by the police in a matter of minutes and transferred to the Judicial police Bamenda. When officials of the City Council secured his release and that of his assistant, leaving the four traders that he had asked to assist him clear the sellers from the Food market street, some traders from the food market quickly grouped and stormed the Judicial Police Station but were prevented from going pass the entrance of the Divisional Office located not far from the Station by heavily armed and triggered readied GSO police men.

Some of the traders feared that those arrested would be transferred to Yaoundé and framed for being those behind the arson on the food market. They tried to mustered courage to protest but were visibly dissuaded by the police presence. They left promising to seek other alternatives.

According to one of the council worker who was released from police custody, some of those arrested seems to have incriminating evidence against them. He said the police had confirmed that they had evidence against the four still under their custody.  The police would not alow even the press into the police compound blocking every channel to get their side of the story.

Despite these arrests, the general consensus is that the market was deliberately set ablaze by hoodlums and extremists who want a strict continuation and compliance by all to the calls for an effective ghost town. This school holds that the burning was a direct reaction to the  huge presence of sellers and buyers at the Food Market on Monday March 13. They justify this by the fact that other acts of vandalism and sabotage were carried out that same night at the City Chemist Roundabout, were the belongings of a roadside seller there were burned down while others at the same place were spared.

But as they days go by, others are pinning the blame on the government and its security operatives whom they accuse of trying to “give the dog a bad name and hang it” There have been text messages circulated around town that a prominent baron of the regime was in town before the incident and held a meeting with his thugs who are believed to be behind the market fire as a means to ferment disunity amongst the general population and wean interest in the ghost town that has been crippling government activities and has turn out to be the face of the civil disobedience by the Anglophone masses. Others claim it was meant to show the international community that is developing some interest in the crisis that the proponent of the strike action are using violence and violating human rights..

Reacting to the fire incident, the Government Delegate to the Bamenda City Council, Vincent Ndumu Nji in a meeting convened with the traders at the Parcour Vita on Wednesday March 15, said there were no electrical installations at this part of the market and that completely rules out a power short circuit as a possible cause of the fire, leaving open the much taunted suspicion of arson.

Whatever suspicion or conspiracy theory is advanced, the fact remains the same, that many innocent people have been caught up in this very dangerous game and as both side to the Anglophone crisis strategize to outwit the other. Dialogue has been kicked out side and intimidation, arrest, arson, disobedience and kidnapping invited into the house. What remains clear is that if this deadlock continues, many more innocent people will continue to suffer.

By Abongwa Fozo  and Niba Jerome

<https://bamendaonline.net/hidden-hands-suspected-behind-bamenda-food-market-fire/>

1. **Foncha’s ‘Truth Shall Prevail’ On Federalism Justified**

*Added by*[**Bamenda Online**](https://bamendaonline.net/author/bamendaonline/)*on March 23, 2017.
Saved under*[**National**](https://bamendaonline.net/category/national-2/)*,*[**News**](https://bamendaonline.net/category/news/) *Tags:*[**Anglophone crisis**](https://bamendaonline.net/tag/anglophone-crisis/)*,*[**Cameroon federalism**](https://bamendaonline.net/tag/cameroon-federalism/)*,*[**John Ngu Foncha**](https://bamendaonline.net/tag/john-ngu-foncha/)*,*[**Southern Cameroons**](https://bamendaonline.net/tag/southern-cameroons/)

Decades ago, Dr. John Ngu Foncha, then Prime Minister of Southern Cameroons, was rebuffed by Britain and the United Nations when he asked for full independence for Southern Cameroons. He later advocated for a federation of two equal States into which Southern Cameroons and La Republique du Cameroun entered in 1961. Events of May 20, 1972 and 1984 would emasculate the federation. Thereafter, Foncha made several “declarations to the effect that only federalism as an option…” Today, as the Anglophone crisis rages on, federalism has become taboo, and ‘secession’ in the minds of some compatriots. Was Foncha right then to campaign for federalism to ensure peace, honesty, unity, justice, freedom and democracy, as he strongly believed?

Find the answers in an article penned by late Dr. John Ngu Foncha’s family highlighting his vision for a unified Cameroon.

**Late Dr. John Ngu Foncha’s Vision of *“The Anglophone Problem”***

**by the FONCHA Family**

**Dr. John Ngu Foncha’s**

***“THAT TRUTH SHALL PREVAIL”***

The persistent impasse over the strike action called by the Teachers’ Trade Unions and lawyers in the Northwest and Southwest Regions of Cameroon even after four “accredited” members of these unions signed an agreement to call off the strike, is indicative of a serious, deep-rooted problem that needs to be urgently addressed to get our children back to school, the lawyers back to the courts and the economy in both Regions back on its feet. It is an ill wind, and the continuous delay in resolving it is running down the image of the entire country, not just the Anglophones.

**Bone of Contention**

The stated bone of contention is the **“Demand for a Return to the Federal System of Government,”** on the basis of which Southern Cameroons and La Republique du Cameroun agreed to come together in 1961. This is the crucial point at which the **Foncha Family** feels compelled to reiterate the principles which guided the vision of **late Dr. John Ngu Foncha**.

As the Architect of Reunification, Dr. Ngu Foncha undertook that momentous decision on behalf of the people of Southern Cameroons who, by the 1961 Plebiscite, crushingly gave him their unwavering mandate. Even though he was the elected leader of the Southern Cameroons nation, Dr. John Ngu Foncha was a patriarch who, both within and outside the family, stood unflinchingly for peace, honesty, unity, justice, freedom and democracy; qualities which guided his entire life. Finally, these virtues were encapsulated both in his personal and political life, in theory and in practice, by the motto: “**That Truth Shall Prevail”.**

**The Crucial Question On Many Minds**

The crucial question on many minds and ours is what late Dr. John Ngu Foncha would have done in the present circumstance with the ongoing strikes and the civil action of *Ghost Towns*which are causing such enormous economic and social hardship on the populations of the two Regions. Even more noteworthy, is the imponderable support by the masses for these measures initially called by educators and lawyers who represent the very **“soul”** of Southern Cameroonians. This is ample proof of the people’s readiness to endure these hardships even to the point of sacrificing limb, life and property as the prize for the peaceful change which they ardently yearn for. What would have been the reaction of our father?

The Government response, particularly in the use of deadly force, the arbitrary detention of elected union leaders of civil groups and the punitive severance of internet connections with the outside world, specifically targeting the Anglophone territories, is causing untold havoc on the economy, banking and financial sectors. Furthermore, this selective severance of internet connections by the Government is tantamount to the **collective punishment of a peaceful population,** an act which is inadmissible in today’s civilized world. These are certainly actions the late Dr. John Ngu Foncha would have **condemned** with the **uttermost vehemence**.

**Historical Perspective**

As newly elected Prime Minister of Southern Cameroons, then still under British administration, Dr. John Ngu Foncha went to the United Nations to formally request the independence of the territory. That was intended to be the first step in the process of reunification, a process he and his followers were aware would be long. However, the Administering Authority, Britain, and the United Nations refused to consider the option of independence before reunification, which he asked for, instead imposing the options which are commonly referred to as “The Two Alternatives”:

1. *Do you wish to achieve independence by joining the independent federation of Nigeria?*
2. *Do you wish to achieve independence by joining the independent Republic of the Cameroons?*

Faced with the imposed options, Dr. John Ngu Foncha (and his party) insisted that only a federation of two equal States, backed by a constitution that will permanently protect the interests of the smaller population of Southern Cameroons, would bring about the peaceful and harmonious reunification they aspired for.

**Federalism Misunderstood**

Dr. Foncha’s stand on the crucial issue of federalism as the most acceptable and workable system of administration for the reunified Cameroon in 1961, never wavered and was unshakeable in his mind till he drew his last breath in April 1999. The ***ambushes*** of 20th May 1972 and 1984 were unconstitutional, and, as he characterised them in a letter to the United Nations in 1994, those events were *“…. the total abrogation of all the terms of unification, agreed by the parties concerned, including the UN General Assembly …”*

While the continuous vilification by government officials of proponents of federalism is unfortunate, it is outright alarming when high-level government officials equate *“federalism”* with*“secession”,* a linkage which Dr. Foncha, as shown in his various memoranda and letters, never made. He and the masses he led were democrats and federalists to the core.

**Unfinished Business**

The growing resort to **Secession** by compatriots is an imposition arising from the intransigence and swaggering superiority complex of many government officials. In a country that arrogates that it is a STATE of LAW, in all fairness, responsibility for the present situation cannot belong with the anonymous public. A good part of the responsibility also lies with those *high-ranking Anglophones who****know the truth****and choose to****suppress it****.*

Dr. Foncha consistently made declarations to the effect that only “federalism as an option” reflects the genuine hopes, aspirations and desires of Southern Cameroonians; the most notable being his “**Statement of Withdrawal from the Constitutional Consultative Committee**,” which refreshes memories and puts the concept in its proper perspective. In the statement, he cited the blatant omission of any mention of “federalism as an option” in the proposed constitution submitted by the President of the Republic to the Consultative Committee, despite the serious efforts and submissions on federalism made by thousands of Cameroonians in conferences which include the Tripartite Conference in Yaoundé, the *“Larges Débats”,* and most significantly, the All Anglophone Conference, spanning the years 1991 to 1994.

The undaunted resistance of the people, who have repeatedly been ditched in the past, can be understood within this context. It is actions such as this that are hurting the masses and hardening their resolve, conscious that they are not being hearkened to. The Federal Republic of Cameroon was never intended to be a transient hoodwink to be used and discarded as it pleased those at the helm of power and authority.

Dr. Foncha, in his later years, foresaw the now growing call for secession, and wrote numerous letters to the United Nations and to President Paul Biya, in attempts to contribute and guide the return to the form of federalism that would result in the harmonious reunification of the Cameroon territories which had so far eluded the country. It is a fact that the entrenched intransigence on the part of the President and the administration on this important issue of federalism contributed to the evolution of his views and the desire for the renegotiation of the terms of reunification.

**Our Belief**

Federalism, crafted with the support of a strong constitution was Dr. Foncha’s chosen path to achieving the goal of a peaceful, prosperous and unified Cameroon. The present stalemate does not bode well for that vision. Denial of the problem at hand, pretence that the country is in a state of normalcy, making and implying incorrect assertions, intransigence by government officials, only serve to strengthen the resolve of the population of Southern Cameroons to seek their self-determination.

We believe, like our Father, that dialogue is the way to lasting peace and reconciliation. Dialogue cannot fruitfully proceed without freedom, and freedom is only assured when there is true forgiveness and justice.

The unconditional release of the civil leaders, students and the others detained during this crisis, the demilitarization of Northwest and Southwest Regions, holding accountable those responsible for the abuse of the civil rights of citizens and the restoration of internet services in Anglophone Regions are gestures within the power of government. These are the first steps in the process of restoring true dialogue, bearing in mind that forgiveness is not weakness, but a demonstration of fortitude, an attribute we all seek in our government. This, Dr. John Ngu Foncha fought for, never compromising his values of integrity, honesty, justice and maintenance of peace. **“That Truth Shall Prevail”** was, and remains a powerful motto which we, his family, will always embrace.

***The Foncha Family, February 2017***

<https://bamendaonline.net/fonchas-truth-shall-prevail-on-federalism-justified/>

1. **74M For Bamenda Food Market Fire Victims (important)**

*Added by*[**Bamenda Online**](https://bamendaonline.net/author/bamendaonline/)*on May 5, 2017.
Saved under*[**Human Interest**](https://bamendaonline.net/category/society/human-interest/)*,*[**News**](https://bamendaonline.net/category/news/) *Tags:*[**Adolph Lele Lafrique**](https://bamendaonline.net/tag/adolph-lele-lafrique/)*,*[**Bamenda Food Market fire**](https://bamendaonline.net/tag/bamenda-food-market-fire/)*,*[**bcc**](https://bamendaonline.net/tag/bcc/)*,*[**fire disaster**](https://bamendaonline.net/tag/fire-disaster/)

The President of the Republic, H.E Paul Biya has compensated the victims of the March 14th fire incident at the Bamenda food market where a total of six lockup stores, 91 open stores (temporal stores) and 12 trading benches were ravaged by fire in a suspected arson.

Handing over the financial package to the victims today, May 5, 2017, at a brief ceremony held at the Bamenda Congress Hall, North West Governor, Adolph Lele L’Afrique challenged them to put the money into effective use so that they can start their businesses anew.

 A total of 73,700,000 FRS was distributed to the victims. The six affected lockup stores shared a total 20 million FRS, 475,000 FRS each to the 91 temporal sheds and 100,000 FRS each for the 12 trading tables that were razed to the ground in the fire incident.

The financial support he says is not a compensation for their loss but a gesture from the head of state to his compatriots.

He also called on the victims to Shun all calls for civil disobedience and” stand by the state” as government has taken measures to resolve the current Anglophone crisis raised by Anglophone teachers and lawyers.

Its popular believe in Bamenda that the shops were burnt because they did not respect the calls for ghost town that has paralysed economic activities in the Northwest and southwest Regions for close to four months now.

One of the victims, Mdzemnia Emmaculate, who owned a lock up shed said she received a total of 3.9 million FRS and express her gratitude to the head of state for coming to their aid though she acknowledged that the amount is meager compares to the colossal sum of about 27 million FRS worth of goods that she lost to the fire.

One person, whose names has not been made public is currently held under detention in relation to the  fire incident while the other perpetrators of the act are reported to be on the run, Northwest Governor said.

Through the traders initiative and means, the part of the market that was destroyed by th fire has been reconstructed and reinforced.

By Ndi Tsembom Elvis and Suilareng Elvis

<https://bamendaonline.net/74m-for-bamenda-food-market-fire-victims/>

1. **Is Biya Trying To Cajole NW Population?**

*Added by*[**Bamenda Online**](https://bamendaonline.net/author/bamendaonline/)*on May 25, 2017.
Saved under*[**News**](https://bamendaonline.net/category/news/)*,*[**Northwest**](https://bamendaonline.net/category/northwest/) *Tags:*[**Andre Mama Fouda**](https://bamendaonline.net/tag/andre-mama-fouda/)*,*[**Bamenda-Babajou road**](https://bamendaonline.net/tag/bamenda-babajou-road/)*,*[**Emmanuel Nganou Njoumessi**](https://bamendaonline.net/tag/emmanuel-nganou-njoumessi/)*,*[**Ernest Ngalle Bibehe**](https://bamendaonline.net/tag/ernest-ngalle-bibehe/)*,*[**Northwest**](https://bamendaonline.net/tag/northwest/)*,*[**Paul Biya**](https://bamendaonline.net/tag/paul-biya/)*,*[**road maintenance**](https://bamendaonline.net/tag/road-maintenance/)*,*[**road works**](https://bamendaonline.net/tag/road-works/)

- **11 Government Ministers visit Bamenda within a month**
- **Several multi-billion projects announced**
- **More roads to be tarred**
- **Referral Hospital on the way**

A total of 11 government ministers have been visiting the Northwest within the last 30 days or so for one reason or the other with each proposing or coming to announce some major government projects, which many have seen as government’s ploy to court the NW population away from the crippling social unrest that has engulfed the two Anglophone regions, partially paralyzing economy activities.

The Most recent of these ministers to visit was Emmanuel Nganou Njoumessi who in a highly staged and publicized government propaganda launched reconstruction works on the awaited Babadjou – Bamenda road at a ceremony in the Santa Special Constituency. This road had almost become impassable, with commuters taking over two hours to cover the less than 40km distance coupled with the very bad state of inner city roads within Bamenda itself. The state of the roads into Bamenda from Bafoussam and in town were the fundamental cause of the “**Coffin Revolution”** started on November 21, 2016 by Mancho Bibixy. The government through its partnership with the World Bank is injecting the colossal sum of 60.7 billion FCFA for the realization of the project within 24 months.

Public Health minister Andre Mama Fouda was also in the region to launch the construction of the Bamenda University Teaching Hospital, a level two referral hospital on Tuesday May 16, 2017. Andre Mama Fouda said the project will span 18 months and will cost the government some 15 billion FCFA, 10 billion in construction cost and 5 billion in the form of equipment. A similar project was also launched in Buea.  Befoe this crisis, the Northwest has been lacking in terms of government investment in the health sector. Before now, the only three referral hospitals in the country were found in Yaoundé, Douala and  Sangmelima in the South region where the Head of State hails from. Plans were already afoot for another in Ebolowa, less than a hundred kilometre from Sangmelima before the Anglophone crisis erupted. Many Anglophones have seen this recent move by the Public Health boss as a move clearly intended to woo the disgruntled Anglophone population following years of derelict.

Ernest Ngalle Bibehe Messina , The minister of Secondary Education was also forced to come visiting as the ongoing Anglophone strikes continues to paralyzed the educational systems and in direct flight to confirming a blank school year in the entire country. The crisis led to the complete shutdown of nursery, primary, secondary and tertiary institutions of learning since November 21, and government’s quest for the end of course examinations to be written in the Northwest and Southwest regions was view by most Anglophones as a ploy to devalue the standard of the GCE certificates and the Anglophone system of education as a whole.

Minister Jean Ernest Massena Ngalle Bibehe was emphatic while in Bamenda that all end of course exams must be written. He also adopted an unpopular decision to let students who did not register to sit for the GCE. He also approved the transfer of accommodation centres from private and confessional schools to government schools, he also agreed that the GCE Board should adjust the time for the afternoon session to make sure they end before 5 pm and for candidates to be allowed to put on assorted dresses.

Madam Youssouf Hadija Alim, the Minister of Basic Education also made a tour of the regional headquarters to inspect the writing of the 2017 government common entrance examination into the first year of secondary school.

While other Ministers sojourned in the region to cajole the inhabitants of Bamenda to have a sense of belonging to the most cherished “Unity State”, the PM Philomon Yang and some of his close collaborators  converged on the  Bamenda congress Hall to rather concert on ways the party “close to power” would minimize the impact of the SDF and other political parties boycott of the day and also undermined the impact of the current socio-political anger expressed by Anglophones..

Amongst the president’s cohorts who challenged the horrible roads into Bamenda to show up was the Minister of Urban Development and Housing, Jean Claude Mbwentchou  and that of State Property and Land Tenure Jacqueline Koung a Bessike. They came to inspect the low cost housing in the Bamenda. It is the first time city is having such structures years after it was planned.

Bamenda also played host to the 20th edition of the All Varsity Games. Present were the ministers of Higher Education  and Sports and Physical Education Jacques Fame Ndongo and Ishmael Bidung Mpkatt,  Mbah Acha Rose of the Supreme State Audit, and Atanga Nji Paul of  Special Duties at the presidency.

The visits by the various ministers have been seen as a way to respond to the more than 55 years of neglect of  Bamenda and the entire region as a whole  which lacks passable roads, industries  and some basic facilities of a modern society with only commercial bike taxis as the main mode of employement for the million of youths in the region.

The Northwest  is currently seen as the epicentre of the ongoing civil unrest that has seen Mondays popularly declared as a non-working day in the region. North westerners have generally seen all these moves by government  as maneuver to stop them going ahead with the strike that seems to be crippling and eroding government’s trust and control over the people.

But it would appear that these outings have done little or nothing to change the people’s  psyche as they still continue to hold tightly to their firm grip on the government’s balls . The only hope is for those arrested during the unrest to be granted general amnesty while negotiations continue.

By Ndi Tsembom Elvis

<https://bamendaonline.net/is-biya-trying-to-cajole-nw-population/>

1. **GCE2017 Witnesses Low Turnout Amidst Tight Security In Bamenda**

*Added by*[**Bamenda Online**](https://bamendaonline.net/author/bamendaonline/)*on June 12, 2017.
Saved under*[**News**](https://bamendaonline.net/category/news/)*,*[**Northwest**](https://bamendaonline.net/category/northwest/) *Tags:*[**Anglophone crisis**](https://bamendaonline.net/tag/anglophone-crisis/)*,*[**anglophone education**](https://bamendaonline.net/tag/anglophone-education/)*,*[**GBHS Bamenda**](https://bamendaonline.net/tag/gbhs-bamenda/)*,*[**GBHS Bamendakwe**](https://bamendaonline.net/tag/gbhs-bamendakwe/)*,*[**GBHS Down Town**](https://bamendaonline.net/tag/gbhs-down-town/)*,*[**GCE Board**](https://bamendaonline.net/tag/gce-board/)*,*[**GCE2017**](https://bamendaonline.net/tag/gce2017/)*,*[**GTHS Bamenda**](https://bamendaonline.net/tag/gths-bamenda/)

Campus of GBHS Bamenda Down Town this morning[/caption]

Candidates started sitting in for the written part of the June 2017 session of the GCE Board examination in all 10 regions of the country with special security measures put in place in "unified-accommodation" centres in the Northwest and Southwest regions due to the ongoing Anglophone crisis in the country.

In Bamenda, candidates took the exams in four special centres of GBHS Down Town,  GBHS Bamenda,  GBHS Bamendakwe and GTHS Bamenda. At GBHS Down Town, a total of 1244 in the General Exams and 184 in the Technical GCE are sitting for the Examination. This total numer of candidates are from 16 centres, including big centres like PCHS Mankon, St Federic College and GBHS Down Town. Examination officials who refused to make any declaration to an anxiously waiting press said they could not with any certainty give accurate figures of the candidates that had effectively turn up for today's session.

At GBHS Bamenda, Ntamulung, officials there said the centre was accommodating candidates from eight different centres. 273 candidates were confirmed for O/L Economics, 148 turn up and 46 were absent. For Advanced level Economics, 197 candidates indicated to sit for the examination there, 91 were present this morning and 78 candidates were absent. For O/L Economics in the Technical GCE, 16 registered, 10 turn up and six absences were recorded. A/L technical also registered similar figures with on 11 of the 23 candidates that registered for Economics caring to show up. Huge absences were also recorded in geology and O/L engineering.

Security was heavy at these centres with the police and gendarmes guarding the entrances and taking up positions in the campus.

Some candidates who mustered the courage to talk to Bamenda Online said the examination was within their reach and felt secured with the heavy troop presence. They however acknowledged that most of their mates were not writing. One candidate in particular said she was not writing out of her own volition but due to the pressure of her father who had insisted over and over that she wrote the exams.

Ordinary level candidate sat in for economic paper one in the morning session and paper II in the afternoon session, while Advanced Level candidates sat for Economics and Geology in the morning and afternoon sessions. The GCE Board following instructions from the minister of Secondary Education has adjusted the time for the afternoon session which will begin at 1pm instead of 2 pm as in previous examinations.

Organizing and running the GCE examinations entails huge logistical preparation, plaining and execution but it was not the case this time around as the Board was pushed and forced to admit candidates up to this day, provoking some anglophone who see it as government’s move to undermined the credibility of the certificate to continue to call for a boycott. None of the candidates turn up today in their official school uniform, one of the recommendations of the minister of Secondary education. Another difficulty for the candidates was getting a means of transport to the centre as today was declared a ghost town in Bamenda, making movement of people very difficult. Others have likened this GCE as the  “political GCE” Early this morning, some candidates came in late at GBHS Down Town and insisted to write the exams, saying they have been to other centres but could not find their names. The police were helpless in the face of it and examination officials were forced to accommodate them, close to an hour after the others had started. The exams would run for three weeks.

By Abongwa Fozo and Ndi Tsembom Elvis

<https://bamendaonline.net/gce2017-witnesses-low-turnout-amidst-tight-security-in-bamenda/>

1. **NW Governor Tours FSLC Centres**

*Added by*[**Bamenda Online**](https://bamendaonline.net/author/bamendaonline/)*on June 13, 2017.
Saved under*[**News**](https://bamendaonline.net/category/news/)*,*[**Education**](https://bamendaonline.net/category/society/education/) *Tags:*[**Adolph Lele Lafrique**](https://bamendaonline.net/tag/adolph-lele-lafrique/)*,*[**anglophone education**](https://bamendaonline.net/tag/anglophone-education/)*,*[**Bali**](https://bamendaonline.net/tag/bali/)*,*[**batibo**](https://bamendaonline.net/tag/batibo/)*,*[**Fokum Emmanuel**](https://bamendaonline.net/tag/fokum-emmanuel/)*,*[**FSLC**](https://bamendaonline.net/tag/fslc/)*,*[**Fundong**](https://bamendaonline.net/tag/fundong/)*,*[**Widikum**](https://bamendaonline.net/tag/widikum/)

Northwest Governor Adolphe Lele Lafrique is touring centres accommodating pupils currently writing the First School Living Certificate – FSLC examination today. The Governor left Bamenda a while ago for Fundong, Boyo Division. A release from his office also indicates he will visit centres in Bali, Batibo and Widikum before the examination wraps up later this afternoon.

The examination is written in the backdrop of the ongoing Anglophone Crisis, and comes a day after secondary and high school students started with the written part of the GCE in both the Ordinary and Advanced Levels in the Technical and General sections. Francophone pupils are also sitting in for the CEP, the FSLC equivelent.

The Governor made a stop over at the GBTTC Bamenda on his way to Fundong. The visit is to asses the level of participation of pupils and the security of the candidates. Several pupils are not sitting for the examination due to the ongoing teachers' strike that began last November 21, 2016 and that has spiral over into a general socio-political crisis known today as the Anglophone Crisis.

By Fokum Emmanuel P.

<https://bamendaonline.net/adolphe-lele-lafrique-tours-fslc-centres/>

1. **Illicit Fuel Trade Hurting NW Economy**

*Added by*[**Bamenda Online**](https://bamendaonline.net/author/bamendaonline/)*on June 17, 2017.
Saved under*[**News**](https://bamendaonline.net/category/news/)*,*[**Others**](https://bamendaonline.net/category/society/others/) *Tags:*[**Bamenda**](https://bamendaonline.net/tag/bamenda/)*,*[**fingue**](https://bamendaonline.net/tag/fingue/)*,*[**Illicit Fuel Trade**](https://bamendaonline.net/tag/illicit-fuel-trade/)*,*[**Ivo Charles Makoge**](https://bamendaonline.net/tag/ivo-charles-makoge/)*,*[**SONARA**](https://bamendaonline.net/tag/sonara/)

The sale of contraband petrol popularly called “fingue” or “zoazoa” in the Northwest region and Bamenda in particular has been strongly condemned by the Northwest Administration who blame it for adversely affecting the economy and the health of the sellers.

The Inspector General of the Region, Ivo Charles Makoge raised the worries during a sensitization meeting at the Governor’s office Wednesday June 14, 2017. He called on road side sellers to desist from the act as it adversely affects their health and the economy or the region.

The regional delegate of water and Energy for the NW, Antoine Bossong said there has been a drastic drop of sales at filling stations in Bamenda. He also added the illegal fuel damages vehicle engines and may cause cancer to those selling it. SONARA, the national refinery company he concluded is the sole body authorized to supply petrol and other related petroleum products in the country.

The Regional Chief of Service for Petroleum products Mboussop Aime Nasser announced that the state losses some 4 million FCFA daily from the illicit trade. The meeting ended with a promised to crack down on the illicit trade and bring to book those found guilty.

An attendant at Citizen Filling Stattion Ntarikon Bamenda confirmed to us their sales has drastically drop from an average of 2800 litre of per day to about 850 litres, hurting their business so heavily.

A drive through the streets of Bamenda would reveal the true extent of the trade with makeshift road side petrol retailers lined along all streets and with some just metres apart like at the Ade Metal Street moving into Travellers where there are over 20 retailers within a 250 metre stretch of the road.

“I don’t have a job, I have written several ‘concours’ and could not make it and am still trying to raise money for the ‘police concours’ and others which are ongoing” Anne Flore tells me as she hurriedly refilled a 5L container to serve a private vehicle that has stopped to refill. Almost all retailers I spoke to told me a similarly line, unemployment, making ends meet, trying to raise money or avoiding to remain idle. This reporter also noticed that many teachers from private and denominational schools have taken up the trade as the current Anglophone crisis continues.

Another aspect that fuels the trade is the cost of a litre of “fingue” which sells at between 450 and 500 FCFA in Bamenda and even less in Bali, Batibo, Widikum and Mamfe as you moves towards Nigeria as compared to a litre of “essence” at the filling station that sells at 639 FCFA in Bamenda and up to 690 FCFA in Mamfe.

“Why would I pay 650 frs for a litre of fuel that I can get same here for 500frs, how much do I earn” a buyer told me in front one of the roadside vendor’s stand at Randevous Junction. “its funny that these guys bribed their way to Bamenda, pay custom and security agents all along the way and still sell cheaper than the official prize of Cameroonian fuel” the same buyer continue. He ended by telling me that the high cost of petrol in Cameroon is because the common man buys for the army, administrator and top ranking government officials whohave free petrol bonds, free cars and free houses saying this only happens in a “banana republic” like Cameroon.

Fighting this illeal trade has proved a difficult one for the administration of the Northwest to handle in the midst of the ongoing Anglophone Crisis and the distrust of government by the general public.

By Mildred Sih in Bamenda

<https://bamendaonline.net/illicit-fuel-trade-hurting-nw-economy/>

1. **Registration For New School Year Launched**

*Added by*[**Bamenda Online**](https://bamendaonline.net/author/bamendaonline/)*on July 30, 2017.
Saved under*[**News**](https://bamendaonline.net/category/news/)*,*[**Education**](https://bamendaonline.net/category/society/education/)*,*[**Law & Human Rights**](https://bamendaonline.net/category/society/law-human-rights/)*,*[**National**](https://bamendaonline.net/category/national-2/) *Tags:*[**2017/2018 school year**](https://bamendaonline.net/tag/20172018-school-year/)*,*[**Abongwa Fozo**](https://bamendaonline.net/tag/abongwa-fozo/)*,*[**Anglophone crisis**](https://bamendaonline.net/tag/anglophone-crisis/)*,*[**November 21 strike**](https://bamendaonline.net/tag/november-21-strike/)*,*[**schools**](https://bamendaonline.net/tag/schools/)*,*[**schools reopening**](https://bamendaonline.net/tag/schools-reopening/)*,*[**teachers' strike**](https://bamendaonline.net/tag/teachers-strike/)

The proprietors, head teachers, principals and directors of schools from nursery to post secondary in the northwest region have resolved to start admitting pupils and students for the next academic year beginning now.

This comes after a meeting of education stake holders in the region with the administration to find ways of re-launching the school year. A series of strike actions by teachers and lawyers and social unrest in the Northwest and Southwest regions now known as the “Anglophone crisis” completely paralysed the previous academic year.

Meeting in Bamenda on July 24, 2017, the Association of Northwest Private Higher Education Institutions (ANOWEPHEI) resolved to commence lectures in all private higher institutions as from October 2017, prepare the ground work for an effective start of the new school year while at the same time proposed that *“in order to diffuse the current socio-political impasse in the Northwest and Southwest and make the learning environment conducive for both students and lecturers, Government should release all persons arrested in connection  with the current Anglophone crisis”*

The meeting also urged the government to “*summon the earmarked National Education Forum as soon as possible to review the educational system in Cameroon”* and for the government to engage in “*meaningful and Frank dialogue*” with all the stake holders in an effort to resolve the current stalemate in both English speaking regions of the country.

ANOWEPHEI use the statement to express concerns over the economic impact of the crisis that it says is causing the NW and SW to lose economic potentials to other regions of the country and to some of our neigbours. “*This bleeding must be halted*” the statement continues and fears that a monster is consuming our children’s future.

Registration of old and new students for the new academic year 2017/2018 is currently going on every day as from 8 am to 2 pm in all the private, public and denominational schools of the Northwest region according to an announcement released after that meeting.

A series of proposals have been drawn up by the education stake holders and sent to the educational authorities on how to catch up with the lost academic year 2016/2017. These include amongst others the extension of the school year by one month, the extension of closing time by one hour, the promotion of all infants, pupils and students to the next class, the reduction of time for extra-curricular activities like the FENASCO, Youth Week, Bilingualism week etc.

In a related move, the administration of the NW has been holding consultative meetings with various segments of the society to gather their opinion on a way forward from the present stalemate. The Secretary General of the NW, Lanyuy Harry Ngwani in one of such confab with media men advised that “we shouldn’t take the future of the children hostage” but look for other ways to address the problem plaguing the two regions.

By Abongwa Fozo

<https://bamendaonline.net/registration-new-school-year-launched/>

1. **Ghost Town Rubbishes Another School Reopening in Bamenda**

*Added by*[**Bamenda Online**](https://bamendaonline.net/author/bamendaonline/)*on September 4, 2017.
Saved under*[**News**](https://bamendaonline.net/category/news/)*,*[**Education**](https://bamendaonline.net/category/society/education/)*,*[**Law & Human Rights**](https://bamendaonline.net/category/society/law-human-rights/) *Tags:*[**Anglophone crisis**](https://bamendaonline.net/tag/anglophone-crisis/)*,*[**anglophone education**](https://bamendaonline.net/tag/anglophone-education/)*,*[**Bamenda**](https://bamendaonline.net/tag/bamenda/)*,*[**Ghost town**](https://bamendaonline.net/tag/ghost-town/)*,*[**school reopening 2017**](https://bamendaonline.net/tag/school-reopening-2017/)

Government officials in Bamenda are busy scratching their heads and revising their ENAM notes as another ghost town brings to nullity another highly publicized and anticipated government school reopening in the region in the midst of the ongoing Anglophone crisis. Despite the presence of the minister of Basic Education in town, another strong statement of defiant has been sent to Yaoundé.

A quick drive downtown Bamenda and a visit to some of the schools this morning tells a different story. It’s a complete shut down in the business district, banks, offices, and markets closed. Intriguing is the Bamenda City Council controlled markets, Ntarikon, Main Market and Food market gates are wide open but there is not a single soul in the lockups to sell or to buy despite threats from the government delegate to close indefinitely any shed that respects the ghost town.

Our reporters spotted a few children at the GBHS Bamenda, all in assorted dresses and some in their uniforms in cars, heading into town.  The minister of Basic Education is due to hold a launching at the Bamenda Grand Stand later this morning, while the SG of the ministry of Secondary Education would hold a similar event at 10 am on the campus of GBHS Down Town-Bamenda.

Below are some of the pictures coming in from the field. Stay connected as we bring you details from across the region and beyond.

<https://bamendaonline.net/ghost-town-rubbishes-another-school-reopening-bamenda/>

1. **Dr. Fomunyoh Hails Independent Press for Promoting Liberties**

*Added by*[**Bamenda Online**](https://bamendaonline.net/author/bamendaonline/)*on September 4, 2017.
Saved under*[**News**](https://bamendaonline.net/category/news/)*,*[**Law & Human Rights**](https://bamendaonline.net/category/society/law-human-rights/)*,*[**Politics**](https://bamendaonline.net/category/politics/) *Tags:*[**Dr. Christopher Fomunyoh**](https://bamendaonline.net/tag/dr-christopher-fomunyoh/)*,*[**TFF**](https://bamendaonline.net/tag/tff/)

Dr. Christopher Fomunyoh founder of “[The Fomunyoh Foundation](http://tffcam.org/tff.php)”(TFF) has praised the efforts of the Cameroonian press is promoting liberties in the country. He was speaking at a press dinner which also doubled as working session with members of his foundation and the reception of a special traditional gift from a friend on Friday September 1, 2017.

Dr Fomunyoh said the press in Cameroon is “helping to advocate for more open space for debate and dialogue, for working so hard to strengthen freedoms of the press and other liberties that are pillars of every democratic society”

He assured the press men that they can always count on his support to make their “efforts worthwhile”

He used the event to clarify the press on the banning of a press event in Yaounde where he was due to participate as guest, his political ambitions and views on the current socio-political crisis in the Northwest and Southwest regions amongst others.

 Dr. Fomunyoh said he was invited to take part in a two-hour long debate by the association of Cameroon Political Journalists to talk on issues of national and international interest. But to his dismay, the meeting was cancelled minutes to the meeting by the D.O for Yaoundé I. He later issued a press statement expressing his disapproval. In it, he strongly condemned the actions of the administration which he added can exacerbate public tension.

The media turnout massively [/caption]

He denied allegations that the banning could have been linked to his ambition to run for presidency in 2018. Dr. Fomunyoh said he has not made any official statement as yet concerning that. “When I make up my mind on a critical issue of national interest I will very voluntarily let you know” he added

He also strongly denied accusations that he had links with the US government and the CIA. He was bitter about media accusations against his person by a certain Belgian national. He said all the information passed out by him are false and that he is being used because he his white to discredit him saying “he does not even qualify to work as my staff member”

Cameroon according to him is going through so many challenges at the moment like the Anglophone crisis, the war against Boko Haram, insecurity in the east to the border with Central Africa, the economy is not on a healthy path (loan agreement with IMF), state revenues are not meeting projected expectations , the country is polarized and there exist a huge generation gap. The country also has a restive population due to high levels of employment, the advert and exchange of idea by the youths and the external world is posing challenges to the government.

There also exist “multiple challenges with our constitutional frame work that is been questioned by many. With ideas that are being brought to the table, that need to be debated, digested  and some of them implemented to create a framework that would allow citizens to contribute to decisions that would impact their lives on daily basis” he continued.

To this Dr. Fomunyoh proposed a “younger generation of leadership” and people who can interact with Cameroonians across the board, with development partners and the international to help reconcile Cameroonians with each other.

He revisited his previous statements on the Anglophone crisis and insisted that he has been steadfast in his declarations since the crisis started in November urging the authorities to address the issues raised by the lawyers and teachers and for freedom of expression prevail. He wondered why it is difficult for Cameroonians in the 21st century to sit down and discuss on their future.

He concluded by calling on government to initiate sincere and genuine dialogue, take time to properly diagnose the problems affecting the country for possible solutions with all voices taken into account.

Earlier, Dr.Fomunyoh received a traditional gift from the family of Ndofor Mathias which included a carving depicting the impact of deforestation on the environment.  The event ended with a meeting of the [Fomunyoh Foundation](http://tffcam.org/tff.php) which is looking forward to opening two women empowerment centres in Kumba and Bamenda

By Abongwa Fozo

<https://bamendaonline.net/dr-fomunyoh-hails-independent-press-promoting-liberties/>

1. **Biya Appoints New D.Os**

*Added by*[**Bamenda Online**](https://bamendaonline.net/author/bamendaonline/)*on September 6, 2017.
Saved under*[**National**](https://bamendaonline.net/category/national-2/)*,*[**Administration**](https://bamendaonline.net/category/northwest/administration/) *Tags:*[**appointment**](https://bamendaonline.net/tag/appointment/)*,*[**bafut**](https://bamendaonline.net/tag/bafut/)*,*[**Bali**](https://bamendaonline.net/tag/bali/)*,*[**Bamenda I**](https://bamendaonline.net/tag/bamenda-i/)*,*[**Bamenda II**](https://bamendaonline.net/tag/bamenda-ii/)*,*[**Bamenda III**](https://bamendaonline.net/tag/bamenda-iii/)*,*[**D.O**](https://bamendaonline.net/tag/d-o/)*,*[**mezam**](https://bamendaonline.net/tag/mezam/)*,*[**Paul Biya**](https://bamendaonline.net/tag/paul-biya/)

 A presidential decree signed on Monday, September 4, 2017 has appointed Divisional officers to some subdivisions in the country, including several in the northwest Region. Five of the seven subdivisions in Mezam are touched by the presidential degree.

In Bamenda II, Tanyi Roquecegnol Akwo comes in, in place of Itoe Peter Mbongo who moves over to Yokadouma in the East Region. He was formerly the D.O of Bazou. Coming in from Ndu is Achu Fru George who takes over from Jude Ewane Mbong as D.O of Bafut Subdivision who moves down to Kumba III in same capacity.

In Bamenda III-Nkwen, Sone Clement Ngoe from Limbe III in the Southwest region takes over from Tarkang Walters who goes on retirement. In Bamenda I, Guibai Baldena Gilbert takes over from Viang Nguelle who goes on retirement. Guibai was previously the D.O for Kumba III. And in Bali, Dolingo Bikinn Diongo makes the short trip from Batibo to replace Kamara Divine Kamara.

For the first time since the coming into force of the Unitary state in 1972, there are more Anglophones serving in both the Northwest and SW as divisional officers, probable a result of the current Anglophone crisis some observers think.

<https://bamendaonline.net/biya-appoints-new-d-os-bamenda-online/>

1. **EDUCATION AND DIALOGUE: THE BEST TOOLS FOR GENUINE NATION BUILDING**

*Added by*[**Bamenda Online**](https://bamendaonline.net/author/bamendaonline/)*on September 14, 2017.
Saved under*[**opinion**](https://bamendaonline.net/category/opinion/opinion-opinion/) *Tags:*[**Anglophone crisis**](https://bamendaonline.net/tag/anglophone-crisis/)*,*[**anglophone education**](https://bamendaonline.net/tag/anglophone-education/)*,*[**Headline**](https://bamendaonline.net/tag/headline/)*,*[**Prof. Emmanuel Pondi**](https://bamendaonline.net/tag/prof-emmanuel-pondi/)

Never in the modern history of popular emancipation has not going to school been used as a winning strategy to attain the full emancipation of a people. Let us be clear from the onset. As I acknowledged in a reflection published as early as December 22nd, 2016 – for a crisis which started on November 21st 2016-, many of the claims voiced by our Anglophone compatriots were and remain both understandable and valid.

Indeed, more respect is due for the constitutionally-derived linguistic provisions, by turning into daily practice the notion of equality of status between English and French – in that order in our fundamental text. The same holds true for the necessity to secure free and open access to meritorious Anglophones at all levels of the high decision-making circles of the public and private domains of the State. In the same vain, greater attention should certainly be paid to the uniqueness of the historical path that has brought East and West Cameroon together. This singularity should be manifested by the preservation of the two distinct official cultural heritages of the concerned populations.

More importantly perhaps, political promises and commitments made in the 1960’s and 1970’s ought to be kept today with more rigour. Contrary to the belief often expressed by many Cameroonians, I am absolutely convinced that politicians who last long in that capacity are those who are committed to truth telling.

Today it is my belief that the issue of federalism ought no longer to be considered as a taboo subject, in as much as it is gaining ground in the minds and hearts of a growing number of Cameroonians, as a realistic solution to our common present crisis.

As a staunch Pan-Africanist however, it stands to reason that I do not support any move that advocates secession in Cameroon or anywhere else in Africa. The truth is that I have personally been to Eritrea twice and to South Sudan and North Sudan three times. I can therefore rely on what I saw.

Having sketched my positions concerning these aspects of the “Anglophone crisis” – for lack of a better term, – since I believe that all Cameroonians are affected by this situation one way or the other, I would now like to focus on a related topic which seems equally relevant: the place and the importance of school in the dynamics of nation- building and the role truthful dialogue can play to consolidate our national unity.

**School as a major tool for popular emancipation and nation building.**

A quick glance into the rear view mirror of the recent history of the battle for human emancipation informs us that, as a general rule, the disadvantaged populations always tends to mobilize themselves for a fight in their collective determination to secure a better access to education, and not the way around.

In the United States of America for instance, the landmark decision of the US Supreme Court known as Brown vs Board of Education (of Topeka in the state of Kansas), rendered on 17th of May 1954, overruled another previous US Supreme Court decision known to legal experts as Plessy vs Ferguson of 1896, which upheld, as valid, the application of racial discrimination in the state of Louisiana.

Standing at opposite ends to that infamous 1896 US Supreme Court ruling, the 1954 decision (also recorded as decision n°347 US 483) officially declared the practice of racial segregation in all Kansas schools, as totally unconstitutional. The US Supreme Court decision Bolling vs Sharpe extended this prescription to the entire country in 1955. By so doing, the new ruling opened the road to updated knowledge, critical thinking and to the socio-economic insertion of the “Black Americans” into the American Dream. From the “Brain power” acquired in schools, they were indeed able to conquer their full-fledged civil rights in 1964 and 1965. It equally seems important to strongly underline that these conquests were in no way accomplished by politicians. They were the brain children of civil rights leaders, hailing from all segments of the US civil society. But we all know now with hindsight, that all of them were well-educated.

The second example that could serve to illustrate the link between education, emancipation and nation-building, comes from our own continent, in the then racist Republic of South-Africa. On the 16th of June 1976, the apartheid regime of that country attempted to forcefully impose the use of Afrikaans, the language spoken by a portion of the white minority, in black schools, thereby restricting access to universal education to a large number of English-speaking blacks who were opposed to such an act of blatant discrimination within an already discriminatory socio-political and cultural system.

A very strong popular resistance to that cynical stratagem brought no less than 20 000 young students and pupils on the street of the South West Township (SOWETO) of the city of Johannesburg on the dreadful fatal day already mentioned above. Firing real bullets, the police is reported to have killed between120 and 700 pupils who were crusading for complete access to quality education for all South Africans, regardless of race, creed or colour. Here again, the SOWETO riots were the defining factor and moment that would finally lead to the advent of full democracy in the “Rainbow Nation”, only eighteen years later, in 1994. Why? Because the students of SOWETO who were only aged 10 at the time of the riots, were 28 when South Africa succeeded to achieve its dream of full universal voting rights for all its citizens, in April 1994. The type of population was in a position to achieve such an outcome, was as an organized group, that had been gradually better educated and, as such, could fight for their own rights.

Another indicator could be used to assess the importance of school in the emancipation process of a people: the educational and professional backgrounds of those who led the colonized territories of Africa towards independence and early nation building in the 1960’s and 1970’s: most of them belonged to the teaching profession.

***An Examination of the educational and professional backgrounds of most fathers of African independences: the clear predominance of school teachers***

When one takes the trouble to quickly investigate the educational and early professional profile of many of the very African leaders who led their peoples to independence, one is surely stuck by one undeniable fact: An impressive majority of them were school teachers. A few were trade unionists or full-fledged politicians.

**Four examples will suffice to illustrate this assertion:**

–  ***Julius K. NYERERE (1922-1999), the former President of Tanzania was also very widely known as “Mwalimu” which in Swhahili, means “Teacher”. He had been a devoted high school teacher for a long time before entering politics.***

***–  Milton OBOTE (1924-2005), the former Head of State of Uganda also used the chalk as a secondary school teacher prior to becoming President of his country twice (1962-1971 and 1979-1985).***

***–  Dr KWAME NKRUMAH, (1909-1972) The Pan-Africanist President of Ghana, had acquired all the qualifications to become a University don before being absorbed by politics.***

***–   Closer to us, John NGU FONCHA (1916-1999): the former Prime Minister and Vice-President of Cameroon, is remembered by so many of his compatriots for having taught for a long time in Bamenda schools in the 1930’s.***

***–   Salomon TANDENG MUNA (1912-2002), former Prime Minister and Speaker of the National Assembly of Cameroon. Prior to entering the field of politics, he assumed the responsibility of Head of several Primary schools between 1932 and 1947, before becoming Head Tutor of Batibo Teachers Training College between 1947 and 1951.***

The common link in the lives of all these illustrious African personalities is that they were first illuminated by the light of knowledge brought to them by their traditional and modern schooling, before illuminating the path of the many succeeding generations that had been placed under their responsibility. Indeed, the uplifting socio-economic role of school could not have been more evident than in the light of their individual and collective subsequent careers.

An argument which is often heard from those who support the “school boycott approach” is that “there is no need for children to go to school since schooling in this system offers no guarantee for a stable and bright future”. This academic system, according to them, offers no access to employment.

Though the overall assessment of “poor quality education” is by and large accurate – an issue which I have alluded to in many of my publications – depriving students and pupils from school will lead to producing an illiterate, dangerous, violent and disgruntled future society.

The “school boycott approach”, such a reasoning is all the more surprising that a sizable majority of the current Anglophones leaders, including the most critical of its current functioning, went through this educational system. The training they received in this “mediocre” system allowed them to succeed in life in Cameroon and even more so abroad. What follows from all of the above, is the certainty that democracy allows all citizens to choose the path they deem best for themselves, so as to achieve the goals which they hold dear to their own hearts. It is of extreme importance however, to realize that a problem which has been lingering for the past 40 years cannot be resolved in the space of only one year.

***The Necessity for Constructive Dialogue: In Search of Bridge-builders and Bridges in the current Cameroonian Landscape.***

When “the Anglophone crisis” erupted, one observation became surprisingly glaring. The absence of a sizable number of devoted and enthusiastic grassroots groups of people, willing to defend the cause of peaceful coexistence in both cultural entities. Neither the Francophones nor the Anglophones took it upon themselves, as organised civil society groups, to consolidate national unity.

This is hardly surprising. Not much in our school curricula teach English-speaking pupils and students anything of deep value on French-speaking Cameroon and vice-versa. As a consequence, the two communities have grown apart culturally and continue to do so even when living in close physical proximity. In truth, most Francophones do not know much about Anglophones and the reverse is unfortunately absolutely true. Hence, the big boulevard for misunderstandings, rumour-mongering, and the flourishing of mutual negative prejudices.

Crises should be perceived as momentous times for creating a new political order accountable to the real needs of the people. The time for dialogue is now. Who should be the actors in this necessary dynamics of bridge-building? The communities that can understand and fit into both cultural backgrounds (through marriage, educational training, peace building, etc.).

But dialogue is more effective when conducted amongst two rational sides, ready to discuss in a peaceful and open manner. Fruitful dialogue also requires at least two major ingredients: humility from all actors and trustworthiness as a general principle. It is to be feared that none of the above is for the moment is clearly detectable in the current context. It appears as though the process leading to peaceful dialogue has been hijacked by hard-headed people on both sides of the debate. All parties concerned should stand away from their certainties and engage in a genuine listening process aimed at really understanding each other’s viewpoint. Once this is done, real dialogue can take place.

In conclusion, it seems important to highlight at least one major point in the midst of many others: refraining from going to school or from sending one’s children to school cannot be considered as a rational solution for a people whose legitimate ambition is to transform their societies into communities whose members are fully equipped to meet the challenges of the 21st Century in the context of a knowledge-based economy.

In this light, more than ever before, there is a strong need for our educational system to train pupils and students able to become productive, self-reliant, efficient and proud citizens who know their country and their continent. Failure to do so could lead to disastrous consequences.

The current crisis is not only an Anglophone problem. It is the concern of all Cameroonians of good faith. For when violence persists in a given society, you can rest assured that it is a manifestation of an unresolved conflict.

**Professor Jean-Emmanuel PONDI**

**International Relations Institute of Cameroon (IRIC)**

<https://bamendaonline.net/education-dialogue-best-tools-genuine-nation-building/>

1. **Extended Ghost Town Losing Steam**

*Added by*[**Bamenda Online**](https://bamendaonline.net/author/bamendaonline/)*on September 15, 2017.
Saved under*[**News**](https://bamendaonline.net/category/news/)*,*[**Socio-Economic**](https://bamendaonline.net/category/society/development/) *Tags:*[**Anglophone crisis**](https://bamendaonline.net/tag/anglophone-crisis/)*,*[**anglophone education**](https://bamendaonline.net/tag/anglophone-education/)*,*[**Bamenda**](https://bamendaonline.net/tag/bamenda/)*,*[**ghost towns**](https://bamendaonline.net/tag/ghost-towns/)

The call for three days of ghost town forced on the populations of the Northwest and Southwest regions have witnessed a downward trend in week two.

**T**he ghost town usually leaves the streets of Bamenda quiet with total blackout to business activities, a general silence around markets and its surrounding areas, handful of commercial motor bikes and a couple of taxis if any, plying the roads

The situation witnessed a change this week with more economic activities witnessed particularly around markets. More Yellow caps were visible on the streets particularly on the third day. The thia slow pick up of commercial activities some inhabitants say is due to the increase in frequency of ghost town days from one to three in a single week.

The one day ghost town that started in January had made business persons to adjust their schedules with Sundays used for catch-ups while Mondays become the day of rest.

In a press release signed on the 6th of August 2017 by Barrister Eyambe Elias Deputy S.G and Tassang Wilfred, the program coordinator of the outlawed Cameroon Anglophone Civil Society Consortium, a three day ghost town was instituted in former West Cameroon, to run till the 4th of October 2017.

For a second week running, the denizens of Bamenda have found it difficult to cope with the financial hardship. Bike riders now make unreasonable profit due to hike in bike fares. The township taxis have also announced their presence on the streets while hawkers and roadside vendors have continued to answer present.

Money transfer institutions are going about with their activities normally but classical banks and micro finance institutions still shut down their businesses for fear of the unknown. In the residential areas, bars and other petit businesses are partially opened to customers and visitors.

The people of former West Cameroon have called on the government to release the remaining Anglophone detainees held at the Kodengui Maximum security prison and the Secretariat for Defense (SED) and initiate dialogue for a peaceful resolution of the Anglophone crisis.

North West Regional Delegate for Trade sometime in February 2017, estimated that the region looses at least one Billion Francs every ghost town day.

It should also be recalled that the ghost town has in some ways seriously affected the start of a new school year in these regions. Classes are gradually picking up with reports from various public and private schools reporting a gradual rise in number of students turning up.

NDI TSEMBOM ELVIS

<https://bamendaonline.net/bamenda-denizens-disrespect-three-days-ghost-town/>

1. **SDF Pushes For Federation As It Prepares For Convention**

*Added by*[**Bamenda Online**](https://bamendaonline.net/author/bamendaonline/)*on September 18, 2017.
Saved under*[**News**](https://bamendaonline.net/category/news/)*,*[**Politics**](https://bamendaonline.net/category/politics/) *Tags:*[**Anglophone crisis**](https://bamendaonline.net/tag/anglophone-crisis/)*,*[**nec**](https://bamendaonline.net/tag/nec/)*,*[**ni john fru ndi**](https://bamendaonline.net/tag/ni-john-fru-ndi/)*,*[**Nkemlemo Denis**](https://bamendaonline.net/tag/nkemlemo-denis/)*,*[**Pedmia Shatu**](https://bamendaonline.net/tag/pedmia-shatu/)*,*[**SDF**](https://bamendaonline.net/tag/sdf/)

The national Executive Council  (NEC) of the Social Democratic Front – SDF has decided to put to the forefront,  its “federalism Agenda” in the face of the rising Anglophone crisis. This was one of the major outcomes of the NEC meeting on Saturday September 16, 2017, as the party prepares for the 9th national elective convention in October.

Nkemlemo Denis, National Communication vice Chair in his press briefing after the NEC conclave accused those advocating for separation of being sponsored, some by the CPDM. He said the party will accelerate the pressure on the regime to adopt a federal system of government. He said the SDF is the only party that holds the peace of Cameroon.

He blamed the government and the separatists of being extremist in the crisis. The SDF he continued is the only party that is found in the middle, with a reluctant CPDM government not willing to dialogue at one end and the separatist clamouring for a new state at the other end.

The Party Chairman in is opening speech said “the SDF as a political party that started with this struggle should be able to sit down and give a sense of direction”  adding the party cannot “afford to shy off their responsibility at this moment”.

Ni John Fru Ndi blamed the diaspora for hijacking the SDF’s model of government and in turn insulting the party. He called on people with leadership skills, with party commitment and sense of discipline to be voted when the time comes

​

The SDF has voted a budget of about 80 million Frs. for the convention due for  the 27, 28 and 29 of October 2017. The Adamawa, Centre and the South Regions are still under reorganization. The 9th elective convention of the Party is due to put in place a crack team that will lead the party into upcoming elections in 2018. If the electoral calendar is respected, Cameroon is due to hold a general election, municipal, parliamentary and senatorial election in 2018.

By Pedmia Shatu Tita

<https://bamendaonline.net/sdf-pushes-federation-prepares-convention/>

1. **No To Human Right Abuses in SC Launched**

*Added by*[**Bamenda Online**](https://bamendaonline.net/author/bamendaonline/)*on October 19, 2017.
Saved under*[**News**](https://bamendaonline.net/category/news/)*,*[**National**](https://bamendaonline.net/category/national-2/) *Tags:*[**Anglophone crisis**](https://bamendaonline.net/tag/anglophone-crisis/)*,*[**EIUC**](https://bamendaonline.net/tag/eiuc/)*,*[**Human rights abuse**](https://bamendaonline.net/tag/human-rights-abuse/)*,*[**southern cameroon**](https://bamendaonline.net/tag/southern-cameroon/)

[The European Inter-University Centre for Human Rights and Democratization (EIUC)](https://www.eiuc.org/) has launched an online campaign calling for the respect of human rights in Southern Cameroon. The video features people from various parts of the world calling for the rights of persons to be upheld in accordance with the Universal Declaration of Human Rights.

Several persons have been killed, properties torch, hundred  arrested and detained, tortured, others kidnapped, intimidated while other have been forced to flee into exile since the Anglophone crisis erupted in October 2016.  There have also been reports of families not seeing their loves ones since October 1st.

The campaign by [EIUC](https://www.eiuc.org/) is likely intended to bring sanity into a crisis that can otherwise turn ugly. The EIUC located in [Venice](https://en.wikipedia.org/wiki/Venice), [Italy](https://en.wikipedia.org/wiki/Italy) is an in disciplinarian centre covering the area of [human rights education](https://en.wikipedia.org/wiki/Human_rights_education) and research formed by some 41 universities from all EU member states.

<https://bamendaonline.net/no-human-right-abuses-sc-launched/>

1. **Pan African Youth Development Network Dishes Out Peace Pills To Mankon**

*Added by*[**Bamenda Online**](https://bamendaonline.net/author/bamendaonline/)*on November 1, 2017.
Saved under*[**News**](https://bamendaonline.net/category/news/) *Tags:*[**Abdou Karim**](https://bamendaonline.net/tag/abdou-karim/)*,*[**Anglophone crisis**](https://bamendaonline.net/tag/anglophone-crisis/)*,*[**Pan African Youth Development Network**](https://bamendaonline.net/tag/pan-african-youth-development-network/)*,*[**Peace**](https://bamendaonline.net/tag/peace/)*,*[**Peace Gathering**](https://bamendaonline.net/tag/peace-gathering/)

The people of Mankon have been prescribed peace as the ultimate solution to the ongoing Anglophone crisis plaguing Cameroon. This was during a “peace gathering” at the Mankon Fon’s Palace Courtyard, organised by the Pan African Youth Development Network.

Abdou Karim, the main speaker at the gathering used scriptures from the Holy Bible and Quaran to justify that our problems today are because we don’t listen to God.  He classified ‘peace” into self peace, family peace and community peace, saying each inevitable leads to the other, and can be reached when we cultivate inner peace. He described “real peace” as “ not the absence of war but the presence of justice in society

 “You cannot be at peace when your neighbour is in pain…you have to ensure that the peace that reigns in your home should shine in your neighbour’s” he described extremist, terrorist as products of injustice, adding that when injustice, corruption, nepotism, egotism, favouritism and lack of love takes centered stage, the result is resistance, social strife, anarchy…. “One’s man terrorist is another’s freedom fighter” he added.

But all these can be avoided if love leads,  Abdou Karim advised the over 500 men, women and youths of Mankon who listened to his presentation with rapt attention.  He referred them to the sermon of Jesus Christ on the Mount as contained in the book of Mathew. He ended by calling on all, especially the privilege few to engage in acts of charity, sharing and giving which he says will go a long way to bridge the gap between the haves and have-not.  He called on all, be them Christians or Muslim to use the power of peace to confront their daily, political and religious challenges, learn to love, cultivate a culture of peace, tolerance and justice.

Bih Mande Basame, National Coordinator of the Pan African Youth Development Network-Cameroon enjoined those present to first believe in themselves, believe in peace and then they can transport and carry it to others.  Besides coming down to meet the people, Bih Mande said they are also taking the same message to the leaders and elite of the country.  The Pan African Youth Development  African Network according to her intends to hold similar “Peace Gathering” in other Fondoms in the Northwest and Southwest Regions as a means to solving the current crisis.

<https://bamendaonline.net/pan-african-youth-development-network-dishes-peace-pills-mankon/>

1. **B’da Killings: ADF Claims Responsibility**

*Added by*[**Bamenda Online**](https://bamendaonline.net/author/bamendaonline/)*on November 9, 2017.
Saved under*[**News**](https://bamendaonline.net/category/news/)*,*[**Northwest**](https://bamendaonline.net/category/northwest/) *Tags:*[**ADF**](https://bamendaonline.net/tag/adf/)*,*[**Anglophone crisis**](https://bamendaonline.net/tag/anglophone-crisis/)*,*[**Bamenda**](https://bamendaonline.net/tag/bamenda/)*,*[**Jakiri**](https://bamendaonline.net/tag/jakiri/)

The Killing of two gendarme officers in Bamenda in the wee hours of Wednesday has been claimed by the Ambazonian Defense Forces –ADF according to a report by the[Reuters News Agency](https://www.reuters.com/article/us-cameroon-politics/cameroon-separatists-kill-at-least-two-gendarmes-as-anglophone-dispute-escalates-idUSKBN1D81PH).

The report states “[Cho Ayaba, a leading member of the Ambazonian Governing Council, a separatist body established to create an independent state called Ambazonia, said secessionist militants killed three gendarmes in two coordinated attacks in Bamenda, the capital of the predominantly English-speaking Northwest region](https://www.reuters.com/article/us-cameroon-politics/cameroon-separatists-kill-at-least-two-gendarmes-as-anglophone-dispute-escalates-idUSKBN1D81PH)”

A senior official of the Ministry of Communication, Felix Zogo,  Inspector General at MINCOM  confirmed the killing of the gendarmes on his face book profile where he also expressed is personal sentiments on the attack and the crisis.

“[Ayaba said members of the Ambazonian Defence Force, an armed wing of the separatist movement, killed two gendarmes in a first attack around 2 a.m. at a checkpoint near Bamenda airport, and a third was killed in an ambush on a gendarme patrol unit in a Bamenda suburb about an hour later” the report states, adding “We carried out the actions, their security forces are a target and we will continue attacking them until they are gone.](https://www.reuters.com/article/us-cameroon-politics/cameroon-separatists-kill-at-least-two-gendarmes-as-anglophone-dispute-escalates-idUSKBN1D81PH)”

The two officers according to sources close to the Gendarmerie are Marshal Hinma René of the Bafia gendarmerie company and the student  gendarme Sale David, from the gendarmerie training center located at Yeyap in Yaoundé -All two on detachments to the Northwest.

Bamenda denizens reported heavy gun exchanges in parts of  the city  on the night of the killings. Details of the incidents have not been made public. But security forces immediately proceeded to seal parts of  Nkwen and Up Station resulting in some civilians incurring injuries. A civilian reportedly died at the Bafut Check point where the two security officials were killed.

If this attacked is confirmed by the hierarchy of the separatist movement fighting for the restoration of the former West Cameroon, it would be the first time the so called “Anglophone Crisis” has deescalated to targeted killing in what is increasingly becoming more of an arms struggle.

Earlier in the week another gendarme officer was killed in Jakiri Bui Division by unidentified youths and his gun taken away before being returned after the Nwerong (secret society of Nso land) issued an ultimatum. (**follow audio report below**)

The government had blamed two explosions targeting military personnel in Bamenda and a failed similar explosion in Douala on enemies of the state fighting to divide Cameroon.

In reaction to the killings, the Senior Divisional Officer for Mezam, Songa Pierre Rene  has prohibited the movement of persons and goods as from 10 pm to 5 am. The announcement of the order was read on Wednesday November 8 over the CRTV Bamenda. The decision that went into effect on Wednesday will run up to November 23rd. In  prelude to the symbolic declaration of Southern Cameroon's independence on 1 October 2017  by English-speaking secessionists, Songo Pierre made a similar decision on September 28, 2017. He imposed a strict prohibition to move and had also requested the closure of borders.

By Abongwa Fozo in Bamenda.

<https://bamendaonline.net/bda-killings-adf-claims-responsibility/>

1. **Fire Claims Several Floors of National Assembly Building**

*Added by*[**Bamenda Online**](https://bamendaonline.net/author/bamendaonline/)*on November 17, 2017.
Saved under*[**News**](https://bamendaonline.net/category/news/)*,*[**National**](https://bamendaonline.net/category/national-2/) *Tags:*[**fire accident**](https://bamendaonline.net/tag/fire-accident/)*,*[**national assembly**](https://bamendaonline.net/tag/national-assembly/)

National Assemby caught fire around 10 pm Thursday Nov. 16

The fire consumed the 7th to the 4th floor and part of the 3rd , housing various offices including those of the  Vice-Presidents, the Deputy Secretary General, the SDF  parliamentary Group Office, the Directorate of Budget, committee rooms amongst many others. But the hemicycle, where national assembly holds in plenary sessions was spared by the fire.

The fire reportedly started around 10pm on the night of Thursday November 16, 2017b on the 7th floor, and spreading downward.  The ravaging fire was tamed by the intervention of the  Yaoundé Army Rescue Unit backed by those of Yaoundé-Nsimalen international airport and that Cameroon Petroleum Depot (SCDP).

House Speaker, Cavaye Yengui Djibril later showed up at the scene to see the extent of the damage. Other officials of the National Assembly took turns to pass by.  Also present at the scene were the Brigadier General, commander of the first Gendarmerie Region, Housseini Djibo, administrative officials of the Centre region and Mfoundi division.  Also gathered around the Ngoa Ekelle area where the building is located were curious onlookers. Smoke and light from the building could be seen across several neigbourhood of the Nation’s capital.

The incident occurred at a time when MPs had gathered in Yaoundé for the 3rd Ordinary Session devoted towards examination and adoption of a state budget for 2018. It also comes at a time the Anglophone crisis in both the Northwest and Southwest are preoccupying public attention. investigation has been launched to determine the cause of the fire.

<https://bamendaonline.net/fire-claims-several-floors-national-assembly/>

1. **SDF MPs Take National Assembly Hostage**

*Added by*[**Bamenda Online**](https://bamendaonline.net/author/bamendaonline/)*on November 23, 2017.
Saved under*[**News**](https://bamendaonline.net/category/news/)*,*[**Politics**](https://bamendaonline.net/category/politics/) *Tags:*[**Anglophone crisis**](https://bamendaonline.net/tag/anglophone-crisis/)*,*[**cpdm**](https://bamendaonline.net/tag/cpdm/)*,*[**national assembly**](https://bamendaonline.net/tag/national-assembly/)*,*[**protest**](https://bamendaonline.net/tag/protest/)*,*[**SDF**](https://bamendaonline.net/tag/sdf/)

Some opposition Members of Parliament of the opposition Social Democratic Front -SDF have disrupted proceeding in the National Assembly, demanding the Anglophone crisis be tabled for discussion.

The MPs took to the rostrum chanting songs commonly used by Anglophones in confrontation with security forces during the crisis, forcing the speaker and other ruling CPDM MPs to abandon the session to the handful of SDF MPs.

In a letter of notice sent to the Speaker of the House by the SDF parliamentary group dated November 22, 2017 and signed by Hon. Joseph Banadzem, the Party’s parliamentary group leader, the SDF states “no work will take place in this House during this session if a definitive solution is not sought for the Anglophone Crisis”

The Notice titled “**CONDITION SINE QUA NON FOR THE CONTINUATION OF PROCEEDINGS OF THE ON-GOING NOVEMBER 2017 PARLIAMENTARY SESSION**” the SDF states inter-alia that they have exhausted all possible options to force the government to reason on the Anglophone crisis.

“The national Executive Committee met several times and came out with a special resolutions decrying the inaction of the government and its application of strategies that rather inflamed the people of these two regions” the notice read

The statement goes further to add that following a broad based consultation, which final document was handed to the government, the party came to the conclusion that the origin of the crisis “was a breach of the Federal constitution of 1961 by the purported Referendum of 1972” describing the 1961 constitution as a document by the “Founding Fathers” of the Cameroon with the aim of  “our collective living together” with equal status for Anglophones and Francophones.

Because of the CPDM government’s reluctance to address the problem, the notice goes further to state “it became an imperative for the MPs to engage a new action as the crisis has become very bloody”

The SDF boycotted the opening session of parliament on November 7, 2017, still in protest and as a means to force parliament to up debate on the Anglophone Crisis. In an effort to avoid a crisis situation, the Speaker of the House Cavaye Yengui Djibril summoned the SDF parliamentary group for consultation the next day at 9 am.

Bamenda Online later gathered that four MPs of the SDF,  Hon. Joseph Banadzem, Nintchue Jean Michel, Esther Ngala and  Fobi Nchinda turn up for the meeting but  were left to wait the entire day and it was on the next day that they succeeded to meet with the House Speaker. He reportedly told them that the Anglophone crisis could not be discussed in his parliament.

In a twist of events, [fire caught part of the National Assembly building the next day](https://bamendaonline.net/fire-claims-several-floors-national-assembly/), Friday November 17, completely destroying floor floors of the seven story building.

Following the events of this afternoon at the Assembly, it’s not clear how deliberations on the state budget for 2018 will continue as the SDF has vowed to disrupt it until the Anglophone crisis is brought up for discussion. But from every indication, the CPDM with its crushing majority in the house is unwell to debate the issue in plenary. It’s very difficult or more precisely  impossible for a private member bill to be tabled in the National Assembly, leaving only the government to table bills for deliberation in the house.

 By Abongwa Fozo in Yaoundé.

<https://bamendaonline.net/sdf-mps-take-national-assembly-hostage/>

1. **National Assembly: Another Day of Drama**

*Added by*[**Abongwa Fozo**](https://bamendaonline.net/author/fozo/)*on November 30, 2017.
Saved under*[**News**](https://bamendaonline.net/category/news/)*,*[**National**](https://bamendaonline.net/category/national-2/)*,*[**Politics**](https://bamendaonline.net/category/politics/) *Tags:*[**Anglophone crisis**](https://bamendaonline.net/tag/anglophone-crisis/)*,*[**cpdm**](https://bamendaonline.net/tag/cpdm/)*,*[**national assembly**](https://bamendaonline.net/tag/national-assembly/)*,*[**protest**](https://bamendaonline.net/tag/protest/)*,*[**SDF**](https://bamendaonline.net/tag/sdf/)

The Social Democratic Front SDF has live true to its threats to force the Anglophone Crisis onto the agenda of the national Assembly by hook or by crook. SDF deputies once again broke into parliament today, asking their peers of the presidential majority to table the crisis for discussion which they consider paramount to any other item on the agenda

Hon. Joseph Banadzem, SDF parliamentary group leader took to the rostrum, snatched the microphone from the Prime Minister who was about to present the 2018 draft budget.  Immediately some members of government like Gregoire  Owona and the PM’s security came to his defense blocking SDF MPs who were determined to interrupt his presentation.

The PM continued his presentation albeit drowned in the chanting by SDF MPS.  They were singing the 2008 hunger revolt popular song “le pays va mal” roughly translated “The country is on bad footing”  The PM  took over 50 minutes to present the state budget, virtually unheard by the confused CPDM MPs and a watching diplomatic corps. But a huge applause was reserved for the PM by the CPDM MPs at the end.

[SDF MPs Take National Assembly Hostage](https://bamendaonline.net/sdf-mps-take-national-assembly-hostage/)

While all this was happening, security officials ordered all journalists and cameramen to stop filming or recording the confrontation. Those who tried to resist the orders had their phones seized and others forcibly sent out of the reporting both.

The Social Democratic Front after boycotting the opening of this session voved to block preceeding if the Anglophone Crisis is included in the agenda. The CPDM with its crushing majority in the house is unwilling to bring the crisis in plenary and is accusing the SDF of not following due procedure to include an item in the agenda of the house.

SDF Chairman Ni John Fru Ndi also arrived Yaoundé today, it’s still not clear what role he is expected to play in the ongoing saga at the National Assembly

By Abongwa Fozo in Yaounde.

<https://bamendaonline.net/national-assembly-another-day-drama/>

1. **Manyu SDO Orders Villagers to Relocate As Military Opens New Front**

*Added by*[**Abongwa Fozo**](https://bamendaonline.net/author/fozo/)*on December 3, 2017.
Saved under*[**National**](https://bamendaonline.net/category/national-2/)*,*[**News**](https://bamendaonline.net/category/news/) *Tags:*[**Anglophone crisis**](https://bamendaonline.net/tag/anglophone-crisis/)*,*[**Bernard Okaila**](https://bamendaonline.net/tag/bernard-okaila/)*,*[**Mamfe**](https://bamendaonline.net/tag/mamfe/)*,*[**Manyu**](https://bamendaonline.net/tag/manyu/)*,*[**Oum II Joseph**](https://bamendaonline.net/tag/oum-ii-joseph/)*,*[**security forces**](https://bamendaonline.net/tag/security-forces/)

This is contained in a communiqué signed by Oum II Joseph on December 1, 2017 which calls on residents of some localities in Eyumojock, Akwaya and Mamfe Subdivisions to “relocate to safer neigbourhoods of their choice in the hours that follow, failure of which they will be treated as accomplices or perpetrators of ongoing criminal occurrences registered on security and  defense forces”

The order goes further to warn business men and persons ploughing the Manyu river to “suspend all activities still further notice” and for all motor bike riders “to strictly observe without provocation the suspension of their circulation from 7pm to 6am daily”

But the same decision which Oum II Joseph called for a withdrawal over Radio Evangelum  Mamfe today morning in a special broadcast has been described by Southwest Governor Okalia Benard as fake (listen to Manyu SDO over Radio Evangelum Mamfe admitting signing the document)

The governor speaking in a telephone interview over the State media  CRTV Yaoundé said it “ is a fake document, the regional administration, even the local administration that means the SDO does not recognize that document…” quite contrary to the declarations of the Oum II Joseph over Radio Evangelum Mamfe.

The decision drew quick criticism from Cameroonians at home and abroad who saw it as preparing the ground for massive arrests and killings of the people of the concern areas.

[Following the Head of State’s  return from Abidjan on Thursday November 30 2017](https://bamendaonline.net/biya-vows-defeat-killers-security-forces-convenes-urgent-security-meeting/),  where he vow to put “out of harm’s way” those killing security forces in the two Anglophone regions, the military high command met in an urgent conclave in Yaoundé the next day where its believe the decision to open up a new military front was taken. Cameroon is presently involved in several fronts against Boko Haram in the Far North, Central African rebels in the East, pirates in the Bakassi Peninsular and north in the Northwest and Southwest regions.

The decision to relocate the residents of the concern villages as contained in that communiqué must have been taken at a high level in (Yaoundé) before the ignominy of it became clear, prompting the decision to immediately cancel (as the SDO of Manyu confirmed) or to denied it was ever issued in the first place (SW Governor)

Manyu division has been at the epicentre of the Anglophone crisis since it escalated into killing of security official with seven killed there so far.

<https://bamendaonline.net/manyu-sdo-orders-villagers-relocate-military-opens-new-front/>

1. **Arch Bishop Kleda Advices Biya To Retire**

*Added by*[**Abongwa Fozo**](https://bamendaonline.net/author/fozo/)*on December 7, 2017.
Saved under*[**News**](https://bamendaonline.net/category/news/)*,*[**National**](https://bamendaonline.net/category/national-2/) *Tags:*[**Anglophone crisis**](https://bamendaonline.net/tag/anglophone-crisis/)*,*[**Arch Bishop Kleda**](https://bamendaonline.net/tag/arch-bishop-kleda/)*,*[**National Episcopal Council**](https://bamendaonline.net/tag/national-episcopal-council/)*,*[**Paul Biya**](https://bamendaonline.net/tag/paul-biya/)

 hop of Douala and President of the National Episcopal Conference of Cameroon, Bishop Samuel Kleda has called on the Head of State Paul Biya to step aside in 2018 if he truly loves Cameroon. The Prelate made the statement in an interview with the French Paper, La Nouvelle Expression published on Tuesday December 5, 2018.

“If President Paul Biya really loves this country, he would rather think of a peaceful transition by passing power to another person, either within his party, the CPDM, or within a party of the opposition” he said adding  “I am convinced that if there are free and democratic elections in Cameroon, the truth will be surprising”

He advised the President not to listen to praise singers who are urging him to run again in 2018 for their egoistic reasons. “There is a time for everything. I hope that a council of wise people, a council composed of people who love this country, will be set up to find solutions to all these problems that arise today” he proposed.

Concerning the ongoing Anglophone Crisis, Bishop Kleda said the latest occurrences in the two Anglophone regions where civilians, military, gendarmes and police have been killed show that the situation is serious enough.  He called on every Cameroonian to rally and do something before the situation get out of hands. “In my opinion, it is time to get something done; it is time to convene a national forum to which all the forces of the nation will take part, in order to find a solution to this problem. We cannot continue in this radicalization that we observe on both sides” he cautioned.

 Bishop Kleda said the secessionists should be included in any nation al dialogue intended to find a solution to the crisis because many Anglophones are very receptive to the secessionist discourse. He called on the State to “reach out to all its sons, all actors, for a way out of crisis that would relieve everyone” Such a dialogue he continued should not exclude the form of the state saying the form of state is a dynamic process that can be modified according to evolution and governance. He questioned whether these different forms of state inherited from colonization truly meet the development requirements of African countries?

He condemned the burning of churches and schools and that this is far from the solution to the current crisis. “Violence engenders only violence and misery. If we start destroying what we have taken the trouble to build for years, we must ask ourselves who will rebuild them. I insist that everything starts with dialogue. Let those who burn schools and churches know that the actions they take will not solve the problems. I invite them to be calm and the cultivate the spirit of responsibility”

<https://bamendaonline.net/arch-bishop-kleda-advices-biya-retire/>

1. **Northwest Under Tight Curfew**

*Added by*[**Bamenda Online**](https://bamendaonline.net/author/bamendaonline/)*on February 10, 2018.
Saved under*[**Administration**](https://bamendaonline.net/category/northwest/administration/)*,*[**News**](https://bamendaonline.net/category/news/) *Tags:*[**Adolphe Lele Lafrique**](https://bamendaonline.net/tag/adolphe-lele-lafrique/)*,*[**Anglophone crisis**](https://bamendaonline.net/tag/anglophone-crisis/)*,*[**Bamenda**](https://bamendaonline.net/tag/bamenda/)*,*[**curfew**](https://bamendaonline.net/tag/curfew/)*,*[**Northwest**](https://bamendaonline.net/tag/northwest/)

A night curfew from 8 pm to 6 am has been declared over the entre Northwest Region from today, February 10th to Saturday February 17, 2018 renewable. The curfew declared by Northwest Governor Lele Lafrique Cheffo Deben Adolphe follows to days of heighten tension in Bamenda after the killing of a soldier by unidentified individuals on Thursday February 8, at the commercial Avenue and the fatal shooting of a commercial bike rider and his passenger by a gendarmerie patrol team n the wee hours of the same day.

The order restricts all forms of movement of goods and persons across the entire region as from 8 pm to 6 am for a period of one week renewable.  It prohibits the movements of vehicles and persons and calls on transport agencies to leave town before 8 pm and all arrival possible only after 6 am.

The curfew comes following a direct order from the minister of Defense, Beti  Assomo, instructing the two regional governors of the Northwest and Southwest to double military patrols and surveillance in their respective regions and most especially towards the border with Nigeria. The minister’s order stated military intelligence has revealed that secessionists have solicited the help of mercenaries from the Niger Delta group to launch simultaneous attacks in both regions.

The order is expected to have profound effect on businesses which are already suffocating under the weight of the ongoing Anglophone crisis.

Its feared many residents of the region and travelers passing through the Northwest may be caught up unexpectedly as the order was only signed and made public this afternoon, a non-working day for government offices. Many city dwellers are still going on with their regular activities this evening with many expressing surprise at the news of an early nighttime curfew. Many think that it would only provide an opportunity for security forces to extort from the local population through arrest abd demands for bail bond.

<https://bamendaonline.net/northwest-tight-curfew/>

1. **John Fru Ndi  Bows Out Of 2018 Presidential Race**

*Added by*[**Bamenda Online**](https://bamendaonline.net/author/bamendaonline/)*on February 23, 2018.
Saved under*[**News**](https://bamendaonline.net/category/news/)*,*[**Politics**](https://bamendaonline.net/category/politics/) *Tags:*[**2018 Presidential Elections**](https://bamendaonline.net/tag/2018-presidential/)*,*[**Fobi Nchinda**](https://bamendaonline.net/tag/fobi-nchinda/)*,*[**John Fru Ndi**](https://bamendaonline.net/tag/john-fru-ndi/)*,*[**Joshua Osih**](https://bamendaonline.net/tag/joshua-osih/)*,*[**Mbah Ndam**](https://bamendaonline.net/tag/mbah-ndam/)*,*[**SDF**](https://bamendaonline.net/tag/sdf/)

Ni John Fru Ndi, SDF National Chairman would not be a candidate for the 2018 presidential Election in Cameroon. Mr. Fru Ndi made the announcement on February 21, 2018 while opening the party’s 9th Elective National Convention at the Bamenda Congress Hall.

Ni John Fru Ndi said he had “decided to leave the fight to the younger generation” The Chairman challenged who ever will pick the party’s candidacy to carry its aspiration into the battle. He advocated for the putting in place of a Federal System of Government as a solution to the current Anglophone crisis and said he could never succumb to the threats of the secessionists.

Ni John Fru Ndi has been the SDF’s candidate in the 1992, 1997, 2004 and 2011 presidential elections in which he came second to Mr. Biya. This time, at 76, Ni john Fru Ndi has departed from a Cameroon political tradition where the old cling on to power at all cost. Though he would certainly be voted into office as the Party Chairman, the decision will challenge his life time rival, Paul Biya who at 85 is still planning to run for another seven years mandate.

Prepared to take the relay baton are three members of parliament; the Hon. Joshua Osih, 49 and MP for Wouri Central, First Vice National President of the SDF and the first Anglophone to win a parliamentary seat in Douala, the Hon. Joseph Mbah Ndam 63, MP for Momo South and one of the Vice Presidents of the National Assembly and the Hon. Fobi Nchinda, 61, MP for Bamenda-Bali Constituency and former member of the Finance Committee of the National Assembly.

Close to 1500 delegates from the 10 regions of the country are taking part in the convention which runs still Saturday, February 24. The Convention is holding under tight security due to the ongoing Anglophone crisis in the Northwest and Southwest regions. The initial venue was changed from the Big Mankon Catholic and Ntamulung Halls to the Bamenda Congress Hall. Secessionists announced a ghost town that has been holding partially in an attempt to disrupt the event.

Northwest Governor, Lele Lafrique Adophe attended the opening ceremony.  Also present were the representative of the U.S Ambassador to Cameroon, the representative of the Herbert Friedrich Foundation in Cameroon, Titus Edzoa, former Minister of Public Health and a member f the ruling CPDM party.

By Abongwa Fozo

<https://bamendaonline.net/john-fru-ndi-bows-2018-presidential-race/>

1. **Fru Ndi’s Residence Survives Arson Attack**

*Added by*[**Bamenda Online**](https://bamendaonline.net/author/bamendaonline/)*on March 1, 2018.
Saved under*[**News**](https://bamendaonline.net/category/news/)*,*[**Politics**](https://bamendaonline.net/category/politics/) *Tags:*[**Anglophone crisis**](https://bamendaonline.net/tag/anglophone-crisis/)*,*[**ni john fru ndi**](https://bamendaonline.net/tag/ni-john-fru-ndi/)*,*[**secessionists**](https://bamendaonline.net/tag/secessionists/)

Unidentified individuals yesterdy at about 10:30 pm attempted to set ablaze the residence of the National Chairman of the SDF, Ni John Fru Ndi in the Ntarikon neigbourhood. The fire was put out by neighbours who rushed to the scene minutes after. No substantial damage was caused by the fire. The attempt comes days after the holding of the 9th SDF Convention at the Bamenda Congress Hall despite threats from supposed Anglophone secessionists calling on the party not to hold it due to th ongoing Anglophone Crisis and to rather focus its efforts on finding a solution to the crisis.

There has been threats also issued on a number of media men and women in the Northwest region for their personal and proffessional stand  view by the seccessionist to be against the struggle. Due to our policies, we will not be releasing their names and the nature of threats against them.

By Abongwa Fozo

<https://bamendaonline.net/fru-ndi-residence-survives-arson-attack/>

1. **Abouem a Tchoyi! A Prophet Has No Honour In His Homeland.**

*Added by*[**Bamenda Online**](https://bamendaonline.net/author/bamendaonline/)*on May 15, 2018.
Saved under*[**News**](https://bamendaonline.net/category/news/)*,*[**National**](https://bamendaonline.net/category/national-2/)*,*[**opinion**](https://bamendaonline.net/category/opinion/opinion-opinion/) *Tags:*[**Anglopone crisis**](https://bamendaonline.net/tag/anglopone-crisis/)*,*[**David Abouem a Tchoyi**](https://bamendaonline.net/tag/david-abouem-a-tchoyi/)*,*[**opinion**](https://bamendaonline.net/tag/opinion-2/)

About 18 months ago in January 2017, he warned that the anglophone problem could become a second Boko Haram. Tchiroma ridiculed him for his utterances………” The former governor of the South West and North West region, David Abouèm à Tchoyi has sounded a note of caution to President Biya and his Beti Ewondo gang, that the Anglophone crisis may become a more dangerous version of Boko Haram. The respected former civil administrator who served as governor of the two Anglophone regions noted recently that “One can remain deaf to appeals, close one’s eyes to the obvious, clash in denial, or even think like the first Vice Chancellor of the Federal University of Cameroon who, answering this question in 1964, had this memorable phrase: “There is no Anglophone problem; All Anglophones learn French very quickly “. But it is all of us who, very quickly, will be able to be caught up by the realities, warned the experienced administrator.

David Abouèm à Tchoyi pointed out that the Anglophone problem is not about vain threats and rhetoric that Cameroon is one and indivisible. The former governor observed that it is not a problem of living together. He revealed that Southern Cameroons as a nation welcomed thousands of French Cameroonians who escaped indigenous and forced labor from the French colonialists and other French Cameroonians who were involved in the UPC struggle for independence including thousands of men and women from African countries who lived and prospered there in harmony.

So, what’s the problem? How does it arise? Why these recurring eruptions in these two regions? David Abouèm à Tchoyi said there is obviously, an Anglophone problem in Cameroon. “This is not a problem between Anglophones and Francophones: there has never been a conflict between compatriots on both shores of the Mungo, on the basis of linguistic differences. It is not the rejection of what comes from Francophone Cameroon: no community in the North West or South West has ever opposed the practice in its territory of Bassa, Beti, Bamileke, Peuhl, Sawa … or other communities of the former East Cameroon.

David Abouèm à Tchoyi indicated that six facets come to mind:

1- Criticism of the centralized state.

2- The transfer of the decision-making centers to Yaoundé, far from the populations and their problems.

3- Failure to respect commitments to equitably take into account the institutional, legal and administrative cultures and traditions inherited from the former administering powers.

4- Non-compliance with the solemn promises made during the referendum campaign.

5- The change of the name of the State: replacement of “the United Republic of Cameroon” by “the Republic of Cameroon”.

6- Non-respect of bilingualism in the public sector, although the Constitution makes French and English two official languages of equal value.

The former has been making public a better understanding of the Anglophone problem to his French audience.

By Rita Akana with files from CIN

<https://bamendaonline.net/abouem-a-tchoyi-a-prophet-has-no-honour-in-his-homeland/>

1. **Proposal to End the War in Cameroon (I)**

*Added by*[**Bamenda Online**](https://bamendaonline.net/author/bamendaonline/)*on May 20, 2018.
Saved under*[**National**](https://bamendaonline.net/category/national-2/)*,*[**News**](https://bamendaonline.net/category/news/)*,*[**opinion**](https://bamendaonline.net/category/opinion/opinion-opinion/) *Tags:*[**Anglophone crisis**](https://bamendaonline.net/tag/anglophone-crisis/)*,*[**Headline**](https://bamendaonline.net/tag/headline/)*,*[**Nfor N Susungi**](https://bamendaonline.net/tag/nfor-n-susungi/)*,*[**scnc**](https://bamendaonline.net/tag/scnc/)*,*[**Southern Cameroons**](https://bamendaonline.net/tag/southern-cameroons/)

1.0  I read with great interest the statement that was published by Prime Minister Peter Musonge on his Facebook page on the Anglophone crisis in Cameroon.  I was taken by surprise by this statement because it did not seem to reflect the views of a typical insider of the current regime from a man who has previously occupied the position of Prime Minister and head of government under President Paul Biya.

**2.0 In this posting Peter Musonge:**

***Rejects Decentralization***

***Rejects the Bilingualism commission***

***Supports total separation***

3.0 The radical views expressed by Peter Musonge were so diametrically opposed to CPDM doctrine on the Anglophone crisis that many of my Facebook friends challenged me for publishing fake news on my Facebook page. I continued to believe that the statement was from the former PM because we are talking about  very intelligent mam who is a graduate of Sasse College and Stanford University in California.

4.0 This is not the type of person who will create a fake Facebook account in order to express his views. I concluded that the Chairman of the Bilingualism Commission had deliberately taken the decision to express his deepest convictions through Facebook because that is where Cameroon’s youth hangout. He clearly wanted to float certain ideas in the hope that someone will pick them up and do something about them.

1. The genuineness of this posting was confirmed by Paul Nji Atanga, the Minister of Territorial Administration who made a posting on my Facebook page attacking Prime Minister Peter Musonge for turning his back on the government.

6.0 The Minister said: “Musonge crossed the red line of turning his back against the government. I will suggest that he resign his post at the Bilingualism commission and join Ambazonia terrorists if he wants. I will destroy them soon. There is no fake account here because Musonge revealed information that is only available to top government officials in public. Everything Musonge said is completely true but he was not authorized to share that information to the public”.

7.0 I concluded from the barking response of the Minister of Territorial Administration Paul Nji Atanga that something is happening in the Biya government and everybody is looking for a solution to this crisis which has gone out of hand.  There is a deep split between Anglophones who want to see an end through negotiations and those who want to “crush” the separatist armed struggle by force.

8.0 Let me also point out that some of my Facebook friends include some key people in the Biya regime (whose identities shall not reveal) who read my Facebook page regularly because they know that I am not a “tete brule”. On the contrary, I am a serious political strategists whose political thinking on Cameroon is very well known.

9.0 Prime Minister Musonge told the Ambazonian leaders:  “Paul Biya has no control over these events because the European leaders tells him what to do. Stop blaming Biya and go after France, Great Britain, Germany and America. They are all the beneficiaries of your resources. See the list of European and Western Countries that are heavily invested in Cameroon. They are the causes of your problems. If you go after these countries, they will stop supporting Biya with military aid and weapons to fight Ambazonia”. “They all control the Africa Union and UN. All  Anglophone leaders should go after these countries and tell them to stop supporting Biya or else you will destroy their companies and kill their citizens in Cameroon. They will either make new business agreements with Ambazonian leaders or lose everything to new investment companies that are willing to do business with Ambazonia”.

Proposal to End the War in Cameroon(II)

10.0 I decided that I must respond to the Prime Minister’s declaration with a proposal which shall be released on 20 May 2018.  I told the Prime Minister that I would like him to forward the proposal to:

The French Ambassador in Yaounde

The British High Commissioner to Yaounde

The US Ambassador to Yaounde

The German Ambassador to Yaounde

The Russian Ambassador to Yaounde

The Chinese Ambassador to Yaounde

The Nigerian Ambassador to Yaounde

President Paul Biya

John Fru Ndi

11.0 The reason why this proposal shall be released on 20 May 2018 is because seven years ago on 20 May 2011, I addressed a joint letter to Paul Biya and John Fru Ndi forwarding to them a document entitled: “Newcam Prosperity Pact”. The Newcam Pact was a comprehensive bipartisan economic, political and constitutional reform proposal which I wanted the CPDM and the SDF to embrace in order to jointly support my candidature in the presidential elections scheduled for October 2011.

12.0  I tabled this proposal to the two parties because I knew that peaceful political transition cannot take place at the end of President Biyas rule unless the two parties agree on a compromise candidate. I was convinced about my suitability as the compromise candidate.

13.0 I deeply regret that neither Paul Biya nor John Fru Ndi took my proposal seriously because in October 2011, both of them decided to pursue their traditional rivalry by presenting themselves as candidates for the elections. The results were predictable and the rest is history.

14.0 The crisis that started in Cameroon in 2016 was entirely predictable because it had to do with transition and succession in Cameroon.  A problem that started as boycott by Common Law lawyers and the teachers association has now degenerated into an armed struggle between the Cameroon armed forces and the separatists following the restoration of the Republic of Ambazonia on 1st October 2017.

15.0 In December 2017, President Paul Biya rejected any idea about dialogue with Anglophone leaders and dismissed the idea of a return to federalism. He instead declared war on secessionist saying: “Il faut les mater afin de les mettre hors de l’etat de nuire”‘

**16.0 As we speak:**

Thousands of Anglophones have fled their homes and are living as refugees in Nigeria

Southern Cameroons has been flooded with arms as the youth have decided to defend their villages from Cameroonian soldiers who have been sent to kill, steal, destroy, rape and literally burn their villages to the ground forcing them to flee into the bushes.

Dozens of Anglophone leaders are currently held in detention centers in Yaounde and this includes members of the interim Government led by Sisiku Ayuk Tabe,  who were abducted from Abuja Nigeria with the complicity of the Nigerian authorities and the planning and logistic assistance of French Special Forces

17.0 In declaring war against the secessionists President Paul Biya failed to convince the Cameroonian armed forces why they should fight and die in Southern Cameroons. He declared that Cameroon is “one and indivisible”. This is a totally false claim because since 1st October 1961, Cameroon has always been “two and united” and never one and indivisible!!!! Instead it is Paul Biya who has destroyed the fabric of unity by clinging to power for 36 years with the support of France while engaging on a program of systematically destroying the Common law legal system and the English-speaking educational system in the Southern Cameroons.

18.0 The consequence of sending young and poorly trained Francophone soldiers into Southern Cameroons without a convincing reason why they should fight and die is that many of them are dying without fighting. During the course of the last five months, hundreds of young soldiers have been killed in the bushes of Southern Cameroons and we are told that many of them are being buried in mass graves with their boots on. This is a new type of crime against humanity.

**Proposal to end the war in Cameroon(III)**

17.0 The language and tone of President Biya’s declaration of war shows that he expected a quick victory as a result of police action in Southern Cameroons. But as hundreds of soldiers die in the bushes and the state treasury runs out of resource to fight a protracted bush war, it is clear that President Biya cannot win this war.

18.0 The separatists are well armed and are constantly replenished with arms and ammunition captured from young Cameroonian soldiers killed in the bushes. The separatists also have the advantage of fighting on their home turf.

19.0 Everyone knows that the Biya government is running out of money to continue with this deadly confrontation. This means that a solution must be found to convince the armed separatists to lay down their arms. If nothing is done, the separatists will soon take control of the whole territory of Southern Cameroons because time, geography  and other political factors are on their side.

20.0 The question is what should be done? There are four possible options which should be examined:

***– Continue Fighting to the Death***

***– Return to Two State Federation***

***– Decentralization of a unitary state***

***– Negotiated Separation into two sovereign States***

These are the four options on the table now and we must examine them objectively

**OPTION I: Fight to the Death**

21.0 The option of continuing to fight to death is unsustainable because the Biya government does not have the resources to sustain this bloody struggle for long. How many young poorly trained soldiers can be sent to their deaths before triggering a blowback

22.0  Those countries which support Paul Biya like France know that the losses in the armed forces are unsustainable and this will sooner or later turn the army against the government with unpredictable consequences.

23.0 France has wisely decided not to involve the French armed forces in the  struggle like they did in French Cameroons from 1956-1966 when the French armed forces were directly involved in genocidal crimes that were admitted by President Francois Hollande when he visited Yaounde. Emmanuel Macron knows that what is happening in Ambazonia is a legitimate struggle for independence similar to what is happening in New Caledonia,  Catalonia and even Scotland.

24.0 The Anglophone separatists are heavily implanted in the Southern Cameroons and do not lack the support in arms and ammunition to continue the struggle for years because the alternative of becoming a people conquered and relegated to the status of French colony by proxy is unthinkable. The Anglophone Diaspora that supports the armed self-defense has realised that the armed forces are vulnerable and lack the will and the motivation to fight and die.

25.0 Consequently this option must be discarded sooner than later.

**OPTION II: Return to a Two state Federation**

26.0 Option II involving a return to a two state federation is a nonstarter because we lived through that from 1961-1972 and no one is ready to go back to a failed experiment.

**OPTION III: Decentralization of a unitary state.**

27.0 We are made to understand that decentralization is the preferred option of the foreign powers supporting Paul Biya.  But the reality is that the idea of the decentralization of a unitary state is an oxymoron similar to the idea of trying to transform a circle into a square or vice versa. It will never work. None of the young men who have taken up arms to defend their families and loved ones can ever be convinced to lay down their weapons for the idea decentralization.

28.0 None of the three options examined so far can ever convince the separatist fighters to lay down their arms. They will prefer to continue waging war against the Biya regime until the regime is brought to its knees through the economic collapse of the whole country. Since no scenario of ending the war is feasible without the separatists laying down their arms, we are left with the the last option of

**OPTION IV:  Negotiated Separation**

29.0  Negotiated Separation is the only option that can convince the separatists to lay down their arms. The negotiations will be very difficult. But there is no other exit strategy from this war. If the war continues, the economic collapse of the Biya regime is a distinct possibility. However, in the negotiated separation, France and the UK will have to play a key role as permanent members of the UN Security Council.

© May 2018; Dr. Nfor N Susungi

<https://bamendaonline.net/proposal-to-end-the-war-in-cameroon/>

1. **15 British MPs Table Motion To Condemn Atrocities In Cameroon**

*Added by*[**Bamenda Online**](https://bamendaonline.net/author/bamendaonline/)*on May 24, 2018.
Saved under*[**News**](https://bamendaonline.net/category/news/)*,*[**National**](https://bamendaonline.net/category/national-2/) *Tags:*[**Anglophone crisis**](https://bamendaonline.net/tag/anglophone-crisis/)*,*[**Britain**](https://bamendaonline.net/tag/britain/)*,*[**Early Day Motion 1189**](https://bamendaonline.net/tag/early-day-motion-1189/)*,*[**House of Commons**](https://bamendaonline.net/tag/house-of-commons/)

The Early Day Motion 1189 is sponsored by Hywel Williams of Plaid Cymru party and supported by MPS from across the British political divide including MPs from the Labour and Conservative parties and the Scottish National Party. The Early Day Motion 1189 titled the “[Anglophone Crisis in Cameroon](https://www.parliament.uk/edm/2017-19/1189)” was tabled on the 24 of April 2018.

The motion reads “*That this House condemns the violence and state oppression imposed by the Government of Cameroon in the Anglophone regions of the country; highlights with regret that over 20,000 refugees from Cameroon have been registered by the UNHCR in their camps across the border in Nigeria; acknowledges reports that an estimated 1,000 people have been detained and 100 people shot for opposing the Government’s oppression of the English-speaking community; notes that the Government of Cameroon responded to peaceful protests in 2017 by closing borders to the anglophone regions and deploying the Army’s Rapid Intervention Brigade; further condemns the Government of Cameroon for its decision to use force and appeals for a peaceful solution to be found; and calls on the UK Government to press the Government in Cameroon to open talks with anglophone leaders*”

The last of the 15 MPs to sign the motion is Douglas Chapman from the Scottish National Party who supported the motion with his signature on May 8, 2018.

The British Government has constantly called for dialogue as the way out of the crisis. Many Anglophone Cameroonians fault the British Government for being at the origin of this crisis when it abandoned the former British Southern Cameroons Protectorate into negotiations with La Republique without any legal support. Many still think the British can right that wrong now.

<https://bamendaonline.net/british-mps-table-motion-calling-on-the-house-of-commons-to-condenm-atrocities-in-cameroon/>

1. **Elecam Retains 9 For October 7 Poll**

*Added by*[**Bamenda Online**](https://bamendaonline.net/author/bamendaonline/)*on August 10, 2018.
Saved under*[**News**](https://bamendaonline.net/category/news/)*,*[**National**](https://bamendaonline.net/category/national-2/) *Tags:*[**Elecam**](https://bamendaonline.net/tag/elecam/)

Nine (9) candidates have been retained by Elections Cameroon (ELECAM) to run for the October 7 Presidential Elections in Cameroon.

Files of 18 Candidates were disqualified from running for the country’s top job, mostly those who decided to run as Independent Candidates.

The incumbent, Paul Biya of the ruling CPDM Party will be running against some candidates he beat at the 2011 Presidential Elections while six new faces were retained.

**Adamu Ndam Njoya** is not a new comer into the race since the formation of his party, the Cameroon Democratic Union (CDU) in 1991. Ndam Njoya who served as Minister under the Ahidjo administration has failed in several attempts to pose a serious challenge to Paul Biya. The CDU has had difficulties to rise above his Division of origin.

Another candidate who knows the race is **Garga Haman Adji** of the Alliance for Democracy and Development (ADD). Beaten in 2011 by Paul Biya, the ADD has not risen above the Far North Region since he left Government in 1992 after serving as Public Service Minister for two years.

The Elections on October 7 with six new comers, can be one full with plenty of surprise, only compared to what the country witnessed in 1992.

The SDF has invested Joshua Osih to run on behalf of the party. This is the first time since the creation of the SDF that another candidate will run on the party’s ticket other than John Fru Ndi.

The SDF Presidential candidate has a strong following in the North West where the party was founded, South West, his Region of origin and the Littoral where he is Member of Parliament for Wouri. The perfectly Bilingual Business magnet has vowed to create an upset in this year’s race.

Retaining his candidature has simply shut the mouths of those who wanted his candidature rejected because he is of a swiss mum, with Cameroon intolerant to double nationality. Osih now has the chance of doing what Fru Ndi failed to do.

**Maurice Kamto** of the MRC, A Lawyer of international repute, who helped Cameroon to secure the Bakassi Penisula from Nigeria, means business.

The Lawyer resigned from Government where he served as Minister Delegate to the Minuster of Justice resigned to form the Cameroon Reniassance Movement, a party that won ONE parliamentary seat in 2013, less than a year after its creation

Maurice Kamto is a political heavy weight and hails from the West Region of Cameroon

**Akere Muna** stormed the political landscape after an illustrious career as a Lawyer and a son whose father sworn in Paul Biya as Cameroon’s second Head of State will have an uphill task to win thw October 7 race.

The name Muna, is a household name in Cameroon but doesn’t inspire hope to an ordinary Cameroonian. Akere, will have to fight against family stigma and explain to his potential voters that he should be judged by what is father did as an active politician

He will run on the ticket of the Popular Front for Development, which still to make a mark at the political scene.

**Cabaral Libii** of the National Union for Integration towards Solidarity (UNIVERS), has been a social media sensation in Cameroon who has openly castigated the policies implemented by the Biya led Government.

The Professor of Law at the University of Yaounde 2 will use his youthfulness to appeal to more Cameroonians. Born on the 29th of March 1980, Cabaral Libii won the “Best Booster of Cameroonian Democracy Award” in 2017

**Ndifor Afanwi Franklin** is running on the ticket of the Cameroon National Citizen Movement (CNCM) and his decision to run for public office was received with mix feelings with some Cameroonians asking the interest of the Senior Prophet of Kingship Ministries at the top job.

He will be counting on the support of the other churches who have been praying for Cameroon since the Boko Haram insurgency and the Anglophone crisis to give him support and have a man of God at the helm of Cameroon.

Ndifor Frank has a Ministry of close to 5000 Christians and will count much on them to win this race.

**Matomba  Serge Espoir** of the United People for Social Justice is running for the first time though his party failed to impress at the 2011 Presidential Elections under Esther Dang.

Matomba Serge will capitalize on his political experience as councilor of Douala 4, and also his youthfulness can be an asset to him. The 38 year old is a little known politician in an unpopular party.

**Paul Biya of the ruling Cameroon Peoples Democratic Movement** has all it takes to retain the Presidency of the Republic of Cameroon.

The incumbent has been Head of State since 1982 and is the second longest African Head of State.

The CPDM flourishes in all 360 subdivisions of the country and over the years, their National Chairman has been receiving calls to run for another term.

The “Grand National Party” received more than 70% of the votes at the 2011 polls and commands an absolute majority at both houses of Parliament.

**Can the Opposition Form a Coalition?**

Eight Political parties running against Paul Biya apparently is small as compared to 2011 but the percentage scored by the CPDM Candidate is frightening. The CPDM is a religion to most of its supporters who don’t see any other candidate except Paul Biya leading the party and the country.

 It will take the opposition coalition to beat the incumbent in Cameroon. A majority of voters who no longer believe in the Electoral process do not also believe that the nation has a credible opposition that can take over and challenge the current status quo.

Cabaral Libii and Maurice Kamto have hinted that an opposition coalition is possible though that they have not mention who they will invest to run on behalf of the opposition.

Akere Muna has talked quite a lot on the subject and indicated that he can drop his candidacy if he sees a candidate who has a better program that his.

The Leading opposition Party has not openly made a statement about forming an opposition coalition but party militants believe that for a coalition to be formed, other parties should join the SDF.

***BY NDI TSEMBOM ELVIS***

<https://bamendaonline.net/elecam-retains-9-for-october-7-poll/>

1. **MINPOSTEL Debunk Rumours of Possible Internet Blackout**

*Added by*[**Bamenda Online**](https://bamendaonline.net/author/bamendaonline/)*on September 10, 2018.
Saved under*[**News**](https://bamendaonline.net/category/news/)*,*[**National**](https://bamendaonline.net/category/national-2/) *Tags:*[**2018 Presidential Elections**](https://bamendaonline.net/tag/2018-presidential/)*,*[**Internet blackout**](https://bamendaonline.net/tag/internet-blackout/)*,*[**Minette libom Li Likeng**](https://bamendaonline.net/tag/minette-libom-li-likeng/)*,*[**MINPOSTEL**](https://bamendaonline.net/tag/minpostel/)*,*[**October 1**](https://bamendaonline.net/tag/october-1/)

Cameroon’s ministry of Post and Telecommunication (MINPOSTEL) has described as “fake news” a social media allegation that the government will shut down the internet from the 7-9 of October, 2018. Dates which coincides with the holding of the 2018 Presidential elections and its immediate aftermath.

Minette Libom Li Likeng, P&T minister in a rebuttal sent to the National Bilingual Daily, Cameroon Tribune and state radio and TV, CRTV in French states “it’s gross manipulation and fake news”

She denies the existence of such a plan. She described it as means to discredit the state of Cameroon by its enemies.  “Whose goal is to throw anathema on the Cameroonian authorities” the statement read.  The statement goes further to add that under the high patronage of the Head of State Paul Biya and the Prime Minister and Head of government, her ministerial department is open to developing an “ambitious digital ecosystem that respects citizens rights and the laws of Cameroon”

In September 2017, similar rumours circulated online as October 1 approached requiring the minister to issue a similar statement. In January 2017, the minster shut down internet services for three months in the Northwest and Southwest regions as the Anglophone crisis heightened. The minister was caught off-guard when the President called for Internet services to be restored on April 20, 2018. That was when she was attending an event in Douala where she upheld that the ban will continue. Many doubt her outings when the final decision may not rest with her.

By Fokum Emmanuel P.

<https://bamendaonline.net/minpostel-denies-plans-to-shut-down-internet-again/>

1. **Cameroon’s Paul Biya On Shaky Ground**

*Added by*[**Bamenda Online**](https://bamendaonline.net/author/bamendaonline/)*on September 10, 2018.
Saved under*[**National**](https://bamendaonline.net/category/national-2/)*,*[**Features**](https://bamendaonline.net/category/special-reports/features/) *Tags:*[**Cameroon**](https://bamendaonline.net/tag/cameroon/)*,*[**Deutsche Welle**](https://bamendaonline.net/tag/deutsche-welle/)*,*[**Paul Biya**](https://bamendaonline.net/tag/paul-biya/)

*The spiraling crisis in Cameroon’s Anglophone regions has tarnished President Paul Biya’s reputation in the West as an arbiter of stability in tenuous central Africa and could threaten his long hold on power.*

The group of Cameroonians meeting under the blazing sun in Germany represents both sides of the divide in the conflict between armed Anglophone separatists and the country’s Francophone-dominated government.

The women are preparing the fish and meat for the men to barbecue, while a football tournament kicks off nearby. The French- and English-speaking guests at the annual get-together in the city of Bonn of Cameroonians living across Germany chit-chat with ease.

“We get along with each other well. It’s a friendly community – it’s a family community. There is no problem at all,” Tambi Tabong, a physician who heads the Cameroonian Community in Bonn, tells DW.

In the predominantly English-speaking north- and south-west Cameroon – home to around five million people – the picture is very different. Protests by the Anglophones who complained of being marginalized by the Francophone-led government spilled over into violence in 2016 that has escalated since.

Around the barbecue in Bonn, heritage aside, concerns over the escalating violence back home and criticism of the leadership of Paul Biya – Cameroon’s the president for 36 years – are shared.

Tabong says he is scared to return home to Bamenda, the capital of the Northwest Region, and one of the worst-affected areas.

“For me, it’s sad. We have been hoping and praying for change for a long time now, but we have the same status quo. Everyone who is reasonable wishes for change in Cameroon,” he tells DW.

The Anglophones and Francophones alike complain about Biya’s leadership.

“He has been in power because people [around him] want to keep him for personal gains,” a Bonn-based Cameroonian environmental activist says.

“If Paul Biya had decided to run again for another term, it’s not because he wanted it. He is old. If you see him, he is old and tired,” he tells DW,

He was born six years after Biya came to power. His view that the Yaounde government has lost touch with the people — especially the youth – is shared by many Cameroonians.

**What are the critical issues?**

– The UN says 200 civilians have been killed in Anglophone regions since October 2017, while hundreds remain missing

– 3.3 million Cameroonians need urgent humanitarian assistance

– In the Far North Region, one out of every three people is facing emergency levels of food insecurity

– The unemployment rate was at 4.20 percent in 2017

– Cameroon is one of the most corrupt African countries, according to Transparency International

**Paul Biya, a unique dictator?**

Unlike other autocratic leaders in Africa who take a more “hands-on” leadership approach, Biya is known for his “hands-off” style of rule. Like many Cameroonians, Affana notes that Biya uses public funds in the country with a high poverty rate to sustain a bureaucracy of 65 sycophantic ministers and state secretaries. He mostly governs by decree or with the help of laws rushed through a rubber-stamp parliament.

“When you’re a president you have everything and everyone at your disposal and the resources to control,” James Arrey, a professor at the University of Bamenda told DW.

“Since you have everything, then you gain the loyalty of all that matters in the society. That’s how Paul Biya has managed to lead the central African nation for more than three decades.”

Research supported by the Organized Crime and Corruption Reporting Project (OCCRP) shows Biya has spent at least four-and-a-half years in total on private trips in the 36 years he has been president. Over the same period, official trips add up to one year.

In 2006 and 2009 alone, Biya spent a third of his time outside of the country. Most of his trips have been to Switzerland, where he has made himself at home in Geneva’s five-star Intercontinental Hotel, according to the OCCRP.

His regular entourage includes his wife and up to 50 aides, according to the OCCRP, which estimates the total hotel bill and chartered jet costs at around $182 million (€156 million).

By contrast, the average Cameroonian earns $1,400 annually, World Bank figures show.

**What do separatists want?**

– At first, Anglophones peacefully raised their grievances – over the use of French in schools and courts

– A minority wanted an independent state, which they call “Ambazonia”

– The Yaounde government’s violent response to protests in the Anglophone regions in late 2016 prompted many more to call for autonomy

– In September 2017, the Ambazonia Defense Council declared war on the Yaounde government

– On October 1, 2017, Anglophone separatists claimed two regions as the self-proclaimed republic of “Ambazonia”

**The West breaks its silence**

The international community had for two years turned a blind eye to the Anglophone crisis but that has started to change.

“Cameroon embodies the worst humanitarian crisis in the world, that most people are unaware of,” Jeffrey Smith, the executive director of Vanguard Africa told DW.

Vanguard is a nonprofit organization that partners with African leaders and democracy activists to consolidate democratic gains and advocate for free and fair elections in Africa.

Political observers believe that the arguably worsening crisis in Cameroon is largely due to the Biya regime’s use of violence and brutality as a first resort.

“By immediately resorting to violence, Biya and the country’s governing elite, dumped petrol on a long-smoldering fire, transforming the conflict into the runaway conflagration we see today,” Smith says.

In February, German Chancellor Angela Merkel’s personal advisor on Africa, Günter Nooke, held talks with Biya and the governor of the southwestern region.

“He [Nooke] emphasized the responsibility of the government of Cameroon to uphold the significance of human right standards,” a source at German foreign ministry told DW.

In June, the European Union condemned the escalation of the violence and called on Biya to protect civilians and to undertake every effort to resolve the conflict. It also demanded unrestricted access for human rights organizations in the embattled regions and an independent investigation into alleged human rights violations.

**Will Biya finally bow to international pressure?**

It is hard to predict where Cameroon is headed. One thing is clear, however: Biya is almost sure to win the presidential election in October.

Smith believes that, with a conflict that engulfs a fifth of Cameroon’s population and increasing violations, the trust that was once bestowed on the country’s strongman is waning.

“At home, regionally, and indeed internationally, Paul Biya is losing legitimacy on a daily basis, and rightfully so,” Smith says.

**Divisions run deep**

– After World War One, the League of Nations divided Germany’s colonial-era regions in Africa between the Allies — most of the land went to France and Britain.

– Most of Cameroon went to France. A small portion went to Britain.

– After Cameroon gained independence in 1960, English speakers were given the choice of remaining part of Cameroon or joining its bigger neighbor, Nigeria — also a former British territory.

– They voted to stay with Cameroon but have since felt increasingly marginalized by the French-speaking government in Yaounde hundreds of miles away.

<https://bamendaonline.net/cameroons-paul-biya-on-shaky-ground/>

1. **Catholic Church to Monitor 2018 Presidential Poll**

*Added by*[**Abongwa Fozo**](https://bamendaonline.net/author/fozo/)*on September 18, 2018.
Saved under*[**National**](https://bamendaonline.net/category/national-2/)*,*[**News**](https://bamendaonline.net/category/news/) *Tags:*[**2018 Presidential Elections**](https://bamendaonline.net/tag/2018/)*,*[**Arch Bishop Samuel Kleda**](https://bamendaonline.net/tag/arch-bishop-samuel-kleda/)

The Catholic Church has announced the putting in place of a peace and justice commission to monitor the October 7 presidential elections in Cameroon.

The Archbishop of the Metropolitan Archdiocese in Douala and President of the National Episcopal Conference was speaking in a press conference yesterday morning.

His Lordship Samuel Kleda said the role of the church is not to chose a leader but to caution Christians, journalists and Cameroonians in general to maintain peace while choosing a leader who will be able to address the political, social and economic problems plaguing Cameroon.

Archbishop Kleda described the Anglophone crisis as a problem amplified by injustice and bad governance and called on the state to pilot a genuine dialogue.

The Archbishop described as campaign strategy, the result of the US election monitor attributing victory to Paul Biya by 81% .

He said the late Bishop of  Edea Diocese, Dieudonne Bogmis died a natural death according to result of an autopsy conducted by the scientific police from Yaounde.

<https://bamendaonline.net/8254-2/>

1. **PCC Calls for Unconditional Release of kidnapped Students**

*Added by*[**Bamenda Online**](https://bamendaonline.net/author/bamendaonline/)*on November 7, 2018.
Saved under*[**Uncategorized**](https://bamendaonline.net/category/uncategorized/) *Tags:*[**pcc**](https://bamendaonline.net/tag/pcc/)

The Presbyterian Church in Cameroon (PCC) has called on those who abducted 78 students and three staff members of the Presbyterian Secondary school (PSS) Nkwen to “immediately and unconditionally release them”.

In a communiqué by the head of the PCC, the Right Rev. Fonki Samuel on Monday November 5, 2018, he said 11 final year students were first kidnapped on October 31. The kidnappers demanded a huge ransom which the church could not pay. The children were later released but left very traumatized the statement said.

The second incident occurred Sunday November 4, when 78 students and three staff members were abducted still by unknown gunmen. The communiqué goes further to call on “whosoever has committed this grave act of inhumanity on these innocent children and staff members…to immediately and unconditionally release them”The release goes further to call on both the Cameroonian military and Ambazonia militias to respect the right of children to education, to agree on providing maximum security for innocent young Cameroonians to exercise their right to study and for the Cameroonian government to take urgent measures to solve the Anglophone crisis.

It also appeals to the conscience of the  international community and calls for it to “take
note of these grievous cycle of acts of inhumanity that have become a daily occurrence
in Anglophone Cameroon that puts the lives of over seven million people on
harms’ way”. The statement goes further to urge the international community “not
to be aloof” but looks for ways in ending the crisis.

The Anglophone crisis is entering the third year with over 400,000
people displaced internally , over 40 000 seeking refuge in neibouring Nigeria and
over a 100 military, gendarmes and police killed and with an unknown number of secessionists
and civilians killed.

There is presently no concrete effort towards finding a solution
to the crisis both at national and international level.  An All Anglophone Conference hinted by the
cardinal Christian Tume and a group of pro-federalist has received very low
approval from both government and separatist.

President Paul Biya who recently (Tuesday November 6) took a new
oath of office for another seven years mandate has called for the separatist to
drop their arms or face the wrath of the army. He has also promised to speed up
the decentralization process as a solution to the crisis.

Communique by the PCC Moderator

By Abongwa Fozo in Bamenda

<https://bamendaonline.net/pcc-calls-for-unconditional-release-of-kidnapped-students/>

1. **A Day With the Ambazonia Leaders in Court- Part II**

*Added by*[**Bamenda Online**](https://bamendaonline.net/author/bamendaonline/)*on January 14, 2019.
Saved under*[**News**](https://bamendaonline.net/category/news/)*,*[**Reports**](https://bamendaonline.net/category/special-reports/reports/) *Tags:*[**ambazonia**](https://bamendaonline.net/tag/ambazonia/)*,*[**scnc**](https://bamendaonline.net/tag/scnc/)*,*[**Sisiku Ayuk**](https://bamendaonline.net/tag/sisiku-ayuk/)*,*[**Southern Cameroons**](https://bamendaonline.net/tag/southern-cameroons/)

The detained Ambazonia leaders were back at the Yaounde military Tribunal on Thursday January 10 for the case against them to finally open-however it took an eternity for matters to get started.

Initially scheduled for 10am, the hearing was later pushed to 13.00pm due to different hearings that took longer than expected.

**11.56 am :** Arrival of the President of the tribunal Col. Abega Mbezoa epse Eko Eko who headed straight to her office only to emerge about two hours later.

**The Detainees**

**14.40pm :** A white van from the « Prison Principale Kondengui » drives into the court premises with the detainees on board.

Down steps Sissiku Julius Ayuk Tabe  dressed in the traditional regalia from the North West region (toghu) as he makes his way into the court room.

« Le voilà avec l’habit des Bamendas, » a voice by my side tells another curious onlooker in an attempt to describe the Ambazonia leader.

Many were there to see the Ambazonia leader for the first time like his three nieces (all the way from Mamfe) who could not hold their tears as he made his way into the hall.

Next to step out of the van was Nfor Ngala Nfor, dressed as a typical Wimbum man with a black feather-less black cap as if to say he had been stripped off his title.

Shufai Blaise Sevidzem Berinyuy had a similar cap but dressed in a neat simple blue Afritude as he followed suit.

The next pair, Cornelius Njikimbi Kwanga and Fidelis Che were identically dressed in plain grey Afritude.

Egbe Ogork and Barrister Eyambe Elias was the next identical pair as they were elegantly dressed in blue suits.

Che Augustine Awasum’s lamido-styled dressing made him almost the star of the procession though you could barely see his face.

In his normal simple style, Wilfred Tassang Fombang was in a plain blue shirt and a khaki trouser with his white sneaker as he looked cool and reserved as always.

**(Re)Composition of the Court**

14.51pm : The President of the military tribunal makes her way into the courtroom and after the names of the detainees are read out in court, she immediately suspends hearing for « recomposition of the court ».

Thirty minutes later, a new magistrate appears in court. Colonel. Abega Mbezoa epse Eko Eko is handing over the matter to Colonel Mem Michel who will henceforth be in charge.

After calling on all in the court to be respectful so as to ensure a fair trial, the (new) presiding magistrate hands the floor to the defense counsel to enroll more law firms that were joining in.

**Interpretation gulf tears court apart**

The defense counsel through Barrister Akere Muna and Fru John Nsoh insists the court must take appropriate measures to ensure the detainees understand whatever is said in court in the French language. They raised the point to express their dissatisfaction with the quality of interpretation from the interpreter in court. However, the judge waved their argument away and tasked the lawyers to explain to their clients when need be. However, the judge was soon served with his own medicine when he was forced to seek the services of the interpreter after the defense team decided to speak only in English. The interpreter is forced to interprete in French making proceedings even slower.

**Cameroon is at War**

With the composition of the defense counsel done, it was the turn of the civil party but Barrister Fru John Nsoh immeediately raised an objection in court. He says there can not be a civil party in such a case given that Cameroon is at war. Barrister Nsoh backs his claim with Section 27(i) of the Military Justice Code which states that in times of war, application for damages shall be inadmissible- thus no need for a civil party.

But the judge was not moved by the submission as he claimed Cameroon is not at war and such provision can not be applied.  Unless the defense can produce an act of war duely signed, then their claim is not valid, the judge said.

But the defense hit back saying Cameroon has been at war as far back as the Paris summit where the Head of State declared war against Boko Haram as well as in November 2017 against separatists. The defense counsel said the number of persons dying in the North West and South West regions or fleeing these areas is enough proof Cameroon is at war. The creation of a disarmament, demobilization and reintegration committee is equally enough proof Cameroon is at war since you can only disarm a party in a war, the lawyers argued. The judge however waved the submission away.

**Bar President disowns lawyer in court**

The constitution of the Civil party continued to remain a bone of contention as lawyers opposed the presence Barrister Mangoua Duclaire (who has been thee State’s lawyer in all matters involving the Anglophone crisis until now) saying he has been banned from the bar.

The Bar President Takoungang Patie made it clear to the court that he had given autorisation to only three lawyers (Lilian Manka’a, Kenmoe Joseph and Achet Martin Luther) who had written to him requesting autorisation to file in as civil party in the case. Mangoua Duclaire had no option but to leave the hall.

Bar. Takoungang Patie also stressed that the Bar had put at the disposal of two of its members (Eyambe Elias Ebae and Shufai Blaise Sevidzem Berinyuy) four lawyers to defend them in the matter. The lawyers- Maitre Emmanuel Simh, Maitre Claude Assira, Barrister Sufuh Benjamin and Barrister Lifanje- are however free to join the group of lawyers in defending the other accused. On that note, the Bar President bowed out.

**Lawyers want Ambazonia leaders returned to Nigeria**

It was bis repetita for the Ambazonia leaders who once more rejectted the Cameroonian nationality and stressed they were citizens of former British Southern Cameroons now referred to as Ambazonia. Even when some of them said they were refugees, they insisted they were Ambazonia refugess residing in Nigeria.

After proper identification of the accused, the judge could however not proceed as the defense presented three preliminary objections. Barrister Patrick Yong said the military tribunal is not competent to try the accused given that questions have been raised over their nationality. Given that their nationality is a subject of debate, only a civil court can establish it according to section 41(1) of the 1968 nationality codde.  The residences of the accused have been mentioned by the judge and going by the Section 41(2) of the 1968 nationality code, « any such action shall be brought before the court of the domicile or failing that the residence of the person whose nationality is disputed, according to the rules of procedure in force, and the raising of Cameroon of foreign of procedure in force, and the raising of Cameroon of foreign nationality as a defence before any other court suspends further proceedings until decided in the ordinary civil court ». He thus urged the court to order for the detainees to be flown back to Nigeria where their nationalites can be determined.

However, the Prosecutor Colonel Engono Thadée Consatant raised an objection saying most of the accused have worked for the Cameroon Public Service for years and can not today deny their Cameroonian nationality. He cited various means where loss of nationality can be applied but said the Ambazonia leaders do not fall under that category. Quoting Section 31(a) of the 1968 nationality code( Any Cameroon adult national who wilfully acquires or keeps a foreign nationality), he said the Ambazonia leaders still maintain their Cameroonian nationality. He defended the decision to extradite the Ambazonia leaders to Cameroon claiming they pose a heavy security threat to Nigeria thus they can also not be returned.

**Barrister Abdul Oroh narrates ordeal of Ambazonia leaders**

19.28pm : After submissions from the various parties still on the nationality of the Ambazonia leaders, the case is suspended and only resumes thirty minutes later when the floor is given to Nigerian human rights lawyer Abdul Oroh who narrated the ordeal of the Ambazonia leaders while they were arrested and detained in Nigeria. He said all he wanted was justice and their rights be respected and for that to happen, the accused have to be sent back to Nigeria where they were arrested given that no extradition treaty exists between both nations.

**Barrister Eyambe disappointed at Prosecution**

The prosecutor at it again said it was not necessary sending the accused back to Nigeria given the fact he could prove with tangible documents that they are Cameroonians. This submission did not sit down well with one of the accused Barrister Eyambe Elias who expressed his disappointment and accused the Prosecutor for keeping them incommunicado for close to one year yet want them to produce documents that show they are refugees.He urged the court to give them enough time and they will produce their identification documents.

**Case adjourned**

At this juncture, the judge adjourns the case to January 23 for the defense counsel to produce documents that show the accused are refugees and for the Prosecution to also produce proof of the Cameroonian nationality of the Ambazonian leaders. But Barrister Eta Bessong objects requesting at least a 45-day period to put them aat an equilibrium with the prosecution. The court bows to the request and finally adjourns the case to the 7 February 2019.

 To be continued …..

BY AJUMANE AKAM FRANCIS

<https://bamendaonline.net/a-day-with-the-ambazonia-leaders-in-court-part-ii/>

1. **Coach Emmanuel Ndoumbe Bosso Freed!!**

*Added by*[**Bamenda Online**](https://bamendaonline.net/author/bamendaonline/)*on March 20, 2019.
Saved under*[**Elite 1**](https://bamendaonline.net/category/sports/elite-1/)*,*[**News**](https://bamendaonline.net/category/news/) *Tags:*[**Emmanuel Ndoumbe Bosso**](https://bamendaonline.net/tag/emmanuel-ndoumbe-bosso/)*,*[**kidnapping**](https://bamendaonline.net/tag/kidnapping/)*,*[**yosa**](https://bamendaonline.net/tag/yosa/)

The head coach of Yong Sport Academy Bamenda, Emmanuel Ndoumbe Bosso who was kidnapped yesterday by unidentified gunmen has been released. He was release a few hours after as confirmed by the Communication Unit of YOSA. A state issued after his released states;

“The Management of Yong Sport Academy can confirm that Coach Emmanuel Ndoumbe Bosso has been released. He was set free some few minutes ago and is back home. Management sincerely thank all Media men and women and football lovers who used their different platforms to demand for his release. He is back home.”

Earlier the team had released this statement. ” The Coach was taken along the way from his Food Market residence while driving towards the usual pick up point to meet the players at Progressive Comprehensive High School (PCHS) Bamenda. They were to leave for Yong Sport Arena(Yosa Stadium) for a training session against their Day 10 fixture with Eding Football Club.

No contact has been made yet with management by those who took him away.

We pray on those holding the Coach to immediately release him without any harm. The kidnap doesn’t only affect Yong Sport Academy but the entire football family of the North West Region in particular and Cameroon.

We extend appreciation to those already involved in demanding for his release.”

Immediately after his release, this statement was posted online by by Beratanews, one of the Anglophone separatist media outlet. It reads;

“Following the arrest and released of YOSA coach, Bamenda, BaretaNews had earlier said any football game in Southern Cameroons is banned. Our brothers who want to continue playing football can do so in Cameroun without any problem. Take your matches to Cameroun. Ambazonia does not recognise such league. Continuous resistance only attracts the wrath of Ambazonia Self Defense Forces.”

Football lovers have continued to insist that football is apolitical and should not be dragged into the anglophone crisis, and remains the only form of entertainment for now in an already dire situation in the regions affected.

<https://bamendaonline.net/coach-emmanuel-ndoumbe-bosso-freed/>

1. **Ambazonia Commander Arrested In Kumbo**

*Added by*[**Bamenda Online**](https://bamendaonline.net/author/bamendaonline/)*on April 1, 2019.
Saved under*[**Northwest**](https://bamendaonline.net/category/northwest/) *Tags:*[**ambazonia**](https://bamendaonline.net/tag/ambazonia/)*,*[**Anglophone crisis**](https://bamendaonline.net/tag/anglophone-crisis/)*,*[**Kumbo**](https://bamendaonline.net/tag/kumbo/)*,*[**scnc**](https://bamendaonline.net/tag/scnc/)*,*[**Southern Cameroons**](https://bamendaonline.net/tag/southern-cameroons/)

The Ambazonia fighters have taken up arms (mostly locally made) to press for an independent state

A suspected Ambazonia separatist commander operating in Kumbo, Shey Wirngo has been arrested.  Reports from Bui division say Shey Wirngo and his group were intercepted by elements of the gendarmerie on March 30, 2019 in the outskirt Kumbo, about a 100 km North East of Bamenda, the regional capital. He was arrested alongside some of his fighters following an intense gun exchange with security forces that lead to the death of at least two secessionist fighters.

Shey Wirngo became notorious in 2017 with his
militia one of the main Ambazonian units enforcing and upholding the observance
of the “ghost town” days in and around the locality of Kumbo.

Since the outbreak of the Anglophone Crisis in October 2016, several militia groups including the likes of the  Red Dragon operating in Libialem area, Tigers of the Southwest, the 7 Catar of Bafut,  and the  Ambazonian Defence Force (wide area of control)  amongst others have taken up arms, mostly dane guns to fight for the independence of the former Bristish Southern Cameroons.

Some of the local commanders of these militia groups
commonly nicknamed “generals” have recently been killed by government forces in
Libialem, Widikum and Kumbo.

On the other hand the Cameroon military is well equipped and train but has been unable to match the determination of the secessionist

These groups, designated by the Cameroon government
as terrorist groups are fighting for a separate state, territorially  identical to the former British colony of Southern
Cameroons. Must of the loosely coordinated militia groups claim they want to liberate
the people of the former British Southern Cameroon from slavery in the union
with French Cameroon. To them, the union with French Cameroon since 1961 has
been marked by a derelict of the territory by the central government in Yaoundé,
marginalization of  the Anglophones,  assimilation of the territory and culture by
the French and a destruction of the English culture, education and way of life.

**By
Etienne Mengla**

<https://bamendaonline.net/%ef%bb%bfambazonia-commander-arrested-in-kumbo/>

1. **Bouteflika, Bashir—and Biya?**

*Added by*[**Bamenda Online**](https://bamendaonline.net/author/bamendaonline/)*on May 2, 2019.
Saved under*[**opinion**](https://bamendaonline.net/category/opinion/opinion-opinion/) *Tags:*[**Abdelaziz Bouteflika**](https://bamendaonline.net/tag/abdelaziz-bouteflika/)*,*[**BrookingFP**](https://bamendaonline.net/tag/brookingfp/)*,*[**Headline**](https://bamendaonline.net/tag/headline/)*,*[**Jefrey Feltman**](https://bamendaonline.net/tag/jefrey-feltman/)*,*[**Omar al-Bashir**](https://bamendaonline.net/tag/omar-al-bashir/)*,*[**Paul Biya**](https://bamendaonline.net/tag/paul-biya/)

[**ORDER FROM CHAOS**](https://www.brookings.edu/blog/order-from-chaos/)

**Bouteflika, Bashir—and Biya?**

**A raft of crises now face Cameroon**

Soccer fans in Cameroon were
undoubtedly dismayed in January when the Confederation of African Football
stripped the country of its hosting the 2019 June-July African Cup finals. The
body cited security issues and lack of preparation in transferring the honor to
six-time African Cup host Egypt.

But the recent ouster of two
long-serving African presidents—Abdelaziz Bouteflika in Algeria and Omar
al-Bashir in Sudan—has intensified the focus by Cameroonians on the nearly
37-year reign of their aloof 86-year-old president, Paul Biya. Citing corruption
and political marginalization, opposition figures and Anglophone region
activists strive to make Biya the third African leader ousted in 2019 as a
result of popular protests. So far, Cameroon’s security services have managed
to suppress protests that have broken out, but the Cameroonian diaspora in
Europe has been effective in generating sustained attention for change.

While only intermittently
covered by American media, and with the United Nations and African Union mostly
mute, Cameroon is currently engulfed in three separate crises.

First,
since 2014, Boko Haram has terrorized Cameroon’s far north region, adjacent to
Nigeria’s Borno State (where Boko Haram was founded in the city of Maiduguri)
with murders, kidnappings, and destruction of infrastructure. Despite military
support, training, and equipment from the United States and others, Boko Haram
in Cameroon remains a persistent, serious threat. Tens of thousands are
displaced and livelihoods destroyed. With Boko Haram incursions on the rise in
2019, Yaoundé’s brutal security responses are so tainted with [credible
human rights allegations](https://www.nytimes.com/2019/02/07/world/africa/cameroon-military-abuses-united-states-aid.html) that the United States in February
announced a reduction in its assistance.

Second,
peaceful protests against linguistic and political marginalization in
Cameroon’s Anglophone regions erupted in 2016. Anglophones account for
approximately 20 percent of Cameroon’s population, with the rest considered
Francophone (in addition to about 200 local languages). These protests quickly
escalated in 2017 into a violent secessionist insurgency and
counter-insurgency. Anglophone separatists hoping to create an independent
state of “Ambazonia” in the northwest and southwest regions of Cameroon have
attacked soldiers and government installations and killed civilians perceived
to be government sympathizers. Local and international human rights activists [have
documented](https://www.hrw.org/world-report/2019/country-chapters/cameroon) scorched-earth military reprisals and extrajudicial
killings. With positions hardening on both sides, the government rebuffed
mediation and dialogue facilitation offers by the United Nations and others,
demanding that the United Nations Secretary General’s Special Representative
for Central Africa Francois Fall, a former foreign minister of Guinea, end his
quiet diplomacy in the Anglophone region. During his March 2019 trip to
Cameroon in which he encouraged peaceful resolution of the Anglophone crisis,
U.S. Assistant Secretary of State for African Affairs Tibor Nagy was sharply
criticized by pro-government sources for “interference.”

In addition to the heavy burdens imposed by the Boko Haram and Anglophone crises, the U.N. High
Commissioner for Refugees (UNHCR) [estimates](http://reporting.unhcr.org/sites/default/files/UNHCR%20Cameroon%20Fact%20Sheet%20-%20March%202019%20.pdf) that
Cameroon—with a population of 24 million—hosts nearly 400,000 refugees fleeing
violence in neighboring Nigeria and the Central African Republic.

Now, with the Algerian and
Sudanese protests leading to the respective militaries’ removal of two
long-serving presidents, previously disparate and quiescent opposition against
President Paul Biya has mobilized to create Cameroon’s third, and—while not yet
violent—potentially most serious crisis. With previous constitutional term
limits abolished in 2008, Biya, who has ruled since November 1982 (and who
served as prime minister from 1975 until 1982), was sworn in November 2018 for
his seventh presidential term. The official election results, disputed by the
opposition, gave him 71 percent of the vote, with opposition leader Maurice
Kamto in second position, with just over 14 percent.

For years, fatigue and
disenchantment with Biya’s rule has simmered below the surface in Cameroon and
boiled openly in the Cameroonian diaspora. Complaints and jokes focus on his
frequent and lengthy sojourns in Europe, corruption, aloofness, curtailment of
civil liberties, lifestyle of his younger wife Chantal, and (given Biya’s age
of 86) lack of any transparent succession planning. The lopsided official
election results provoked protests in Cameroon and in diaspora communities,
with Kamto claiming victory. The January 2019 arrest of Kamto and scores of
protestors in the port city of Douala attracted scant notice in the media
outside of Cameroon (despite condemnations from Nagy, EU High Representative
for Foreign and Security Policy Federica Mogherini, and others) but reinforced
the opposition protests, especially in Europe. Expats attacked Cameroon’s
embassies in Paris and Berlin and threatened to storm Geneva’s Intercontinental
Hotel, should Biya, a frequent resident, again check in.

Now, with the removals of
Bouteflika and Bashir, anti-Biya protesters hope to attract attention with new
chants: “It can happen in Sudan; it can happen in Cameroon.” So far, Cameroon’s
security services have managed to prevent sustained, mass demonstrations at
home. As was the case in Algeria and Sudan while the protest movements swelled,
it is not clear how the military would react should the Cameroon opposition
movement gain momentum. The military’s performance in the Anglophone and Boko
Haram violence is not encouraging, in terms of adherence to human rights norms.
But fighting Boko Haram terrorists and Anglophone secessionists simultaneously
may give Cameroon’s military leaders pause before taking on, in addition, political
protestors in Cameroon’s Francophone political heartland, should Sudan-style
mass protests materialize. Biya himself is taking no chances: Unusually for
him, he has remained in Cameroon for more than 200 days without travel to
Europe.

What is clear is that this is
the time for conflict prevention efforts by African or other leaders, in hopes
of moderating any response to protests in order to stave off the potential for
a third Cameroon crisis turning violent. The problem is identifying a person,
institution, or country with influence on Biya, who has been as aloof from his
peers as from Cameroon’s citizenry. Despite his frequent and extended absences
from Cameroon, he has not used the time abroad to bond with other leaders,
rarely attending the annual United Nations General Assembly and only
participating in a single African Summit in the last seven years. (Biya
attended the March 2013 African Summit in Malabo, probably due to his shared
Fang ethnic connection to Equatorial Guinean President Teodoro Obiang Nguema
Mbasogo.) Compared to other heads of state in Francophone Africa, Biya is not
especially close to Paris. Given Biya’s de facto part-time residency in
Switzerland, and in light of the Cameroonian diaspora’s focus on Geneva, the
Swiss may have both interests and leverage, especially if backed by others such
as Nagy’s, Mogherini’s, and African Union interventions.

Yet as failed conflict
prevention efforts globally demonstrate, persuading any national leader to
accept outside help to address a domestic political issue is hard. Biya’s
response to U.N., U.S., and other efforts to focus on peaceful resolution of
the Anglophone conflict is not encouraging. Regional and international unity to
demand a political approach to address Anglophone grievances and expand
political space (including release of opposition activists, including Kamto)
might force Biya to adjust his approach but will require leadership by the
United States or another power to muster. Credit agencies have already noticed
that all is not well in Yaounde, with Standard and Poor’s and Moody’s both
recently indicating a “negative outlook” to their respective B and B2 credit
ratings.

Cameroon’s
immediate neighbors are themselves facing challenges and are not in positions
to offer much in the way of help or example. To Cameroon’s northwest, parts of
Nigeria remain terrorized by Boko Haram. To Cameroon’s east, the Central
African Republic remains deeply unstable and violent, despite the February
agreement signed in Khartoum by 14 militias. South of Cameroon, Gabonese
President Ali Bongo Ondimba claimed victory in a disputed 2016 election
(extending his family’s nearly half-century control over Gabon) but has since
October 2018 been absent from Libreville for long stretches of time for health
issues. On Cameroon’s southeastern border, the Republic of Congo under
President Denis Sasso-Nguesso (no stranger to controversial lopsided election
results) has used violence against demonstrators in the Pool region, leading to
tens of thousands of displaced, in addition to hosting thousands of refugees
fleeing violence in the neighborhood Democratic Republic of Congo. This part of
Africa has no shortage of crises, but little in the way of obvious
solutions.

<https://bamendaonline.net/bouteflika-bashir-and-biya/>

1. **5 STEPS FOR THE RESUMPTION OF SCHOOL IN SW AND NW REGIONS**

*Added by*[**Bamenda Online**](https://bamendaonline.net/author/bamendaonline/)*on August 25, 2019.
Saved under*[**News**](https://bamendaonline.net/category/news/)*,*[**opinion**](https://bamendaonline.net/category/opinion/opinion-opinion/) *Tags:*[**Anglophone crisis**](https://bamendaonline.net/tag/anglophone-crisis/)*,*[**anglophone education**](https://bamendaonline.net/tag/anglophone-education/)*,*[**CPP**](https://bamendaonline.net/tag/cpp/)*,*[**Headline**](https://bamendaonline.net/tag/headline/)*,*[**Kah Walla**](https://bamendaonline.net/tag/kah-walla/)*,*[**schools reopening**](https://bamendaonline.net/tag/schools-reopening/)

 Initiates dialogue for a cease-fire with all groups within Cameroon and in the Diaspora that are waging an armed fight in the North West and South West regions.

 Engages in dialogue with the teacher’s unions in the North West and South West regions to determine the conditions for the resumption of school and the guarantee of quality education to children in the North West and South West regions. This will include discussions on elements such as:

 The safety and security of students, teachers and all administrative personnel.

 The mechanisms to address the 3-year gap in education that students have experienced and the various programs to bring students up to speed in their schoolwork.

 The mechanisms to address the fundamental reforms which teachers had put on the table during the discussions in 2016-2017 and which are yet to be addressed.

 Engages in dialogue with all key actors in the educational system including religious organizations, private school proprietors and parents to determine all of the key steps and concrete elements to ensure the return to school.

 Begins the repair and restoration of schools which have been destroyed during the conflict of the past three years.

 Announces the steps of the process to fundamentally resolve the Anglophone Crisis. For the Cameroon People’s Party, this will entail the end of the Biya Regime in order to enable Cameroonians enter into a Political Transition to rebuild our country.

If the Government of Cameroon under the Biya Regime does not take the concrete steps listed above, this will be evidence of its lack of good faith in ensuring that children of the North West and South West Regions.

It is the responsibility of a government to ensure the safety and security of its citizens.

It is the responsibility of the government to ensure that children go to school.

Instead of masquerading and carrying out communication campaigns, the Government of Cameroon under the Biya Regime should take its responsibilities seriously and carry out the concrete actions listed above.

Kah Walla

National President Cameroon People’s Party

<https://bamendaonline.net/5-steps-for-the-resumption-of-school-in-sw-and-nw-regions/>

1. **Biya To Address The Nation on Tuesday 10/09**

*Added by*[**Bamenda Online**](https://bamendaonline.net/author/bamendaonline/)*on September 9, 2019.
Saved under*[**News**](https://bamendaonline.net/category/news/) *Tags:*[**Paul Biya**](https://bamendaonline.net/tag/paul-biya/)*,*[**state of the nation**](https://bamendaonline.net/tag/state-of-the-nation/)

It has been announced by the Civil cabinet of the Presidency that the head of State Paul Biya will uncharacteristically address the Nation on Tuesday September 10, 2019.

The release by Samuel Mvondo Ayolo, director of Civil Cabinet at the Presidency states that the address will be broadcast live on both radio and television. The announcement has sparked speculation in every quarter of national life as many are yet to comprehend what could have driven the public-shy Biya to deliver a public statement at this time. Mr. Biya addresses the nation on only two occasions annually, the 10 of February and on 31 December.

While Cameroonians anxiously await Mr. Biya pre-recorded message to be delivered tomorrow, speculations as to what it holds mount. Many think the president may address issues surrounding the current anglophone crisis and measures taken to address it, the life imprisonment of the anglophone leaders, the insecurity across the country, upcoming anticipated regional elections or a possible resignation as his predecessor in 1982. What ever the outcome, Cameroonians have their fingers hoping this outing could be harbinger of better things to come.

By Abongwa Fozo

<https://bamendaonline.net/biya-to-address-the-nation-on-tuesday/>

1. **Rev. Paul Njokikang Arrested**

*Added by*[**Bamenda Online**](https://bamendaonline.net/author/bamendaonline/)*on October 20, 2019.
Saved under*[**News**](https://bamendaonline.net/category/news/)*,*[**Law & Human Rights**](https://bamendaonline.net/category/society/law-human-rights/)*,*[**Uncategorized**](https://bamendaonline.net/category/uncategorized/) *Tags:*[**Anglophone crisis**](https://bamendaonline.net/tag/anglophone-crisis/)*,*[**arrest**](https://bamendaonline.net/tag/arrest/)*,*[**caritas**](https://bamendaonline.net/tag/caritas/)*,*[**Rev. Fr Paul Njokikang**](https://bamendaonline.net/tag/rev-fr-paul-njokikang/)

Rev. Fr Paul Njokikang at the UN Security Council

The Director of the Humanitarian Arm of the Bameda Arch
Diocese has been arrested and detained at the BIR Camp, Bamenda Airport.

In  statement release
by the communication team of the Humanitarian family in Bamenda and shared on
social media states that he was picked up this morning after he said mass at
Mbinfibe-Mankon.

The statement “strongly condemn the capture and illegal detention of Rev. Fr Paul Njokikang” the reason for his arrest is not yet known but believed not to be unconnected to the anglophone crisis. His arrest also seems to follow a new pattern following the arrest of Islamic Scholar Abdul Karim and journalist Samuel Wazizi  of CMTV for openly speaking against the Yaounde’s handling of the crisis in the two English speaking regions of the country.

Rev. Father Njokikang became famous when he presented a detailed report on the ongoing armed conflict in April at the UN Security Council.

The Humanitarian Family has called for his immediate
release. The Humanitarian Family in Bamenda is currently helping victims of the
ongoing war between Ambazonian separatist forces and the Cameroon military in
providing some basic necessities especially food to the internally displaced
and victims of the conflict.

By Abongwa Fozo

<https://bamendaonline.net/rev-paul-njokikang-arrested/>

1. **Youth Day 2020: Bamenda Launches Weeklong Activities in Pump and Fanfare**

*Added by*[**Bamenda Online**](https://bamendaonline.net/author/bamendaonline/)*on February 4, 2020.
Saved under*[**News**](https://bamendaonline.net/category/news/)*,*[**Education**](https://bamendaonline.net/category/society/education/)*,*[**Northwest**](https://bamendaonline.net/category/northwest/) *Tags:*[**11 february**](https://bamendaonline.net/tag/11-february/)

A traditional dance group performing during the launching

Activities leading up to the 54th Edition of the National Youth Day 2020 have been launched in Bamenda with schools and youth movements from all three subdivisions and the University of Bamenda taking part at the 5th Joint Military Region Up Station Bamenda.

Viang Mekala, Secretary General at the governor’s office setting in for the Governor praised the organizers, especially the head teachers and head of establishments for the massive turnout. He called on pupils, students and youths across the region to shun the lockdown and ghost towns and turn up to celebrate their citizenship. He promised that security forces will be there to protect all persons before during and after the celebration. The 54th edition of the Youth day he added will be celebrated on the back drop of the government’s quest for a permanent return of peace in the country.

The SG also affirmed that the seven administrative heads and the 34 sub-prefects of the region are in place and will preside over the youth day activities in their areas of jurisdiction.

Viang Mekala(L) SG NW Region launched the activities

pupils and students from all three subdivision in Bamenda took part

Mr. Mekala went further to say Youth Day has been “commemorating and celebrating every year the victory and achievement of Cameroonian youths within the national triangle and in the diaspora in almost all fields, agriculture, livestock, blue economy, green economy, digital economy, fisheries, politics sports…”

Activities of the day included traditional dance performances, choral singing, exhibition and a football match pitting CENAJES Bamenda and mix selection of MINJEC staff.

The 2020 launch of week-long activities In Bamenda ahead of the youth day was the most attended since the start of the Anglophone crisis, an indication life is slowly regaining its steam in Bamenda. The 54th National Youth Day will be observed under the theme ***“youth, peace, decentralization and participation in local governance for a new Cameroon***” It also saw the launch of the ***Youth Connekt***, A UN inspired project in the Northwest to assist the youth benefit from a wide variety of projects and incentives

<https://bamendaonline.net/54th-youth-day-activities-launched/>

1. **B’da II Council Passes Mid Year Evaluation**

*Added by*[**Bamenda Online**](https://bamendaonline.net/author/bamendaonline/)*on July 23, 2020.
Saved under*[**Economy & Development**](https://bamendaonline.net/category/economy-development/)*,*[**News**](https://bamendaonline.net/category/news/)*,*[**Socio-Economic**](https://bamendaonline.net/category/society/development/) *Tags:*[**Bamenda II**](https://bamendaonline.net/tag/bamenda-ii/)*,*[**Bamenda II Coucil**](https://bamendaonline.net/tag/bamenda-ii-coucil/)*,*[**Peter Chenwi**](https://bamendaonline.net/tag/peter-chenwi/)

Bamenda II Councillors at the evaluation session

Despite the prevailing crisis, the Bamenda II Council continues to realize the projects detailed in its road map for 2020 and those prompted by the current covid-19 pandemic. In a mid-year evaluation session on July 22, 2020, Mayor Peter Chenwi noted that the “council carried out a vigorous campaign against the spread” of covid-19 with the distribution of soap and tap buckets to all quarter heads, private and public institutions like banks, schools, travel agencies, public offices, snack bars and hospitals.

The council was also able to train the councilors and some council staff on the decentralization code in order to improve output. Twinned with some strategic partners like  GLoTEN (Global Technology and Engineering Network), Olive Mountain (representative of a South Korean based cooperation) in the domains of hardware procurement, agriculture and capacity building. The Bamenda II council also renovated, bought and equipped the temporary structure they are currently occupying due to the Anglophone crisis. It also provided assistance in the form of didactic to all public schools within the municipality.

Mayor Peter Chenwi

The mayor also highlighted numerous projects realized under the public investment budget which included amongst others the equipping of some integrated health centres, the construction of a block moulding factory at Mbingfibieh, classrooms in Mbatu, a civil status centre, rehabilitation of several rural roads in Ntamulung and Buea-Bamenda Street, and a community hall in Ngulang. The council within the past five months succeeded to construct a borehole in Ntankah, and culverts in several localities.

In terms of finances, the accounts of Bamenda II council indicates a revenue of  731,850,321 FCFA representing a 49.83% realization rate and expenditure of 120,665,223 FCFA, that is 8.2% in actual terms. The low rate of expenditure is attributed to the current Anglophone crisis.

Mayor Chenwi however said this could have been more if the actual sources of income open to the council like the markets were exploited. He called on the office of the SDO to revisit the distributions of markets within Bamenda. It should be recalled that the major markets like the Main Market, Food Market and Ntarikon in Bamenda II are under the control of the City Council.

Mezam SDO Simon Emile Mooh in closing the session expressed his satisfaction with the work so far realized within the short span in office. He praised their efforts in revenue collection. He requested the council to double its effort to contain the spread of the novel corona virus in Bamenda II. “Bamenda II Council is the heart of Bamenda” he said, adding that it is in Bamenda II that the Main Market, General Hospital, Major Banks are found, and is heavily populated. He reminded the councilors that Covid-19 is real with over 450 active cases in Bamenda presently. Covid-19 he continued is particularly dangerous for those above 40 years. He called on all to continue to practice good hygiene and follow the barrier measures put in place by government.

By Abongwa Fozo

<https://bamendaonline.net/bda-ii-council-passes-mid-year-evaluation/>

1. **Widikum: Bifang Says Stop To Amba Harassment**

*Added by*[**Bamenda Online**](https://bamendaonline.net/author/bamendaonline/)*on September 4, 2020.
Saved under*[**News**](https://bamendaonline.net/category/news/)*,*[**Law & Human Rights**](https://bamendaonline.net/category/society/law-human-rights/)*,*[**Others**](https://bamendaonline.net/category/society/others/) *Tags:*[**5th Gendarmerie Region**](https://bamendaonline.net/tag/5th-gendarmerie-region/)*,*[**ambazonia**](https://bamendaonline.net/tag/ambazonia/)*,*[**Anglophone crisis**](https://bamendaonline.net/tag/anglophone-crisis/)*,*[**Bifang**](https://bamendaonline.net/tag/bifang/)*,*[**Col. Boum Bissoue**](https://bamendaonline.net/tag/col-boum-bissoue/)*,*[**gendarmes**](https://bamendaonline.net/tag/gendarmes/)*,*[**Widikum**](https://bamendaonline.net/tag/widikum/)

The people of Bifang, a locality in Widikum subdivision have risen above the challenge and take up their collective security into their hands. Recently they apprehended six Ambazonian fighters and their sympathisers and handed them over to the Gendarmarie.

These three claim they were mere cooks for the seperatist fighters

Dagha Taranus Mbun, 2nd deputy Mayor of Widikum says the village traditional council took a stance against any son of the soil who who took up arms to be harassing others and called on them to drop their arms or face the consequences.

“Some of the boys dropped their arms to form a vigilante group to protect the village” he added. All of this as a result of continues education he continued.

The first group of three of arrested say they were coerced into joining the fighters. Speaking in pidgin English they said;

“In Mamfe, I was working in a bakery. They held me and said I was an informant. I refused. They used a knife and pierced me on my cheek and on my hand(showing the parts of body)” Say Allou Bertrand Ashu (21)

For Tangde Lucas (16) he says he is a builder and joined after his father was taken hostage.”They held my father and accused him that he was an informant. They told me that for them to release my father, I must join them”

The third suspect Blaise Mengue (18) Says he was forced to joining the ranks of the fighters at Bator camp by it’s Commander John Bosco who threatened to kill him if he did not.

All three claimed they were being used as cooks by the fighters, seven of them in number and were paid 1500 frs as weekly allowance. They promised never to return to the camps if given a second chance.

They were rounded up by the population of Bifang after an incident in a bar in the village. They were later handed over to the gendarmes in Widikum. Pictures of the three in a gendarme pickup truck had circulated on social media as those behind the gruesome killing of Comfort in Muyuka.

The second group of three seems more experience. One of them Ekwena Allain has been an operative in several camps from Alabukam to Batibo, Numba to Mile 14. Buea. He is suspected to have taken part in several operations leading to the death of civilians, though he claims he played no active part in them. He even claims he tried several times to escape from the boys but was always caught and brought back. He says he knew no one who could have led him to the DDR centre.

The second group rounded up by the population were found with Bamenda II council jacketsGuns and ammunition recovered from fighters

Colonel Boum Bissoue, Légion Commander Gendarmarie Legion NW appreciated the collaboration between the population and the security forces in Widikum and called on other localities to take their security and well being into the hands.

“We are taking this opportunity to thank the collaboration between the population and the Gendarmerie. They even asked the Gendarmerie to go right into their camps. It is a collaboration worth saluting”

Col. Bissoue added these in custody could not be sent to the DDR any more because they did not drop their arms voluntarily. They would be taken to the military tribunal for justice to take it course.

Col. Boum Bissoue, Legion Commander NW

As the anglophone crisis runs it fourth year out, we have seen many communities, weary of the fighting and it’s devastating effects on life and the local economy, gradually shifting towards a return to normality. [Recently the population of Fundong came out en masse to support the military in its drive to clean Boyo Division of seperatist fighters.](https://bamendaonline.net/index.php/2020/08/30/fundong-embraces-normal-life-as-military-cleans-up-boyo/)

By Abongwa Fozo

<https://bamendaonline.net/widikum-pop-and-security-forces-collaborate/>

1. **Teachers’ Trade Unions Call For Stop To Continuing Violence**

*Added by*[**Bamenda Online**](https://bamendaonline.net/author/bamendaonline/)*on September 4, 2020.
Saved under*[**News**](https://bamendaonline.net/category/news/)*,*[**Education**](https://bamendaonline.net/category/society/education/) *Tags:*[**BATTUC**](https://bamendaonline.net/tag/battuc/)*,*[**cattu**](https://bamendaonline.net/tag/cattu/)*,*[**CEWOTU**](https://bamendaonline.net/tag/cewotu/)*,*[**PEATTU**](https://bamendaonline.net/tag/peattu/)*,*[**TAC**](https://bamendaonline.net/tag/tac/)

Anglophone teachers’ trade unions have jointly issued a statement indicting opposing forces in the ongoing anglophone crisis to bury the hatchet and spare the anglophone subsystem of education and the life of students and educators, considered the most affected.

The press release in parts detailed the number of students and educators kidnapped, killed or who died as a consequence of the actions of the belligerents.

“in the 2018/2019 school year, the number of students who were either attacked, kidnapped, tortured and/or shot at was 287… Correspondingly, 28 teachers died in 2018/2019 (08 of them were murdered and the rest from every indication had their deaths provoked by incidents related to the ongoing insurgency) while 36 died in 2019/2020 (03 murdered and 12 dying suddenly…”

The release also mention the names of the last three victims it said were callously murdered. They include messrs Song Paulinus, Pipayu Ibrahim Ritre and Njamshi Nelson Ndi.

It also goes further to outline the damage on school infrastructure. “428 schools in 2018/2019 like 37 in 2019/2020 were either partially or wholly looted, occupied by armed gangs or partially or wholly burnt down.” It states.

The teachers’ representative go ahead to state they can not remain silent in the face of such “heinous acts” and join their voices with all others of decent breeding to condemn in strong terms “all those acts that undermine basic rights and human dignity”

Through the press release, they teachers strongly appealed to the consciences of those fanning the conflict in one way or the other. “We send out a resonant prayer to all compatriot promoting the ongoing insurgency from bases at home or abroad should, each in their individual conscience, resolve to stop playing ‘tingods’ “

The statement also urged the government to “continue to explore ways of reaching out to the parties in the ongoing conflict and addressing the grievances that provoked the crisis in the first place” On the military and security forces to “continue sourcing for ways to secure the beleaguered population and communities” and to especially show restrain.

The press statement in concluding subtly stated that school boycott as a means of expressing grievance cannot go on for ever. They plead for the education of the future general to be spared, stating that “education is the key to success and human development.

From the onset of the strike we did not content that our educational system was totally bad; we indicated a never of lapses and biases that needed to be done away with for our enviable system to continue to gain in quality and ascendency” adding that a good number of the measures have been righted but it’s impact cannot be assessed now because schools are yet to resume fully.

The release finally made mention of the plight of teachers especially in the secular and denomintional sectors who have paid the ultimate sacrifice, going without salaries or their salaries have been slashed.

The press release is signed by the leaders of PEATU, CEWOTU, TAC, BATTUC and CATTU.

By Abongwa Fozo

<https://bamendaonline.net/teachers-trade-unions-call-for-stop-to-continuing-violence/>

1. **Anglophone Problem Rocks National Assembly**

*Added by*[**Bamenda Online**](https://bamendaonline.net/author/bamendaonline/)*on December 12, 2016.
Saved under*[**News**](https://bamendaonline.net/category/news/)*,*[**Politics**](https://bamendaonline.net/category/politics/) *Tags:*[**anglophone education**](https://bamendaonline.net/tag/anglophone-education/)*,*[**anglophones**](https://bamendaonline.net/tag/anglophones/)*,*[**cpdm**](https://bamendaonline.net/tag/cpdm/)*,*[**December 8 strike**](https://bamendaonline.net/tag/december-8-strike/)*,*[**Hon. Joseph Wirba**](https://bamendaonline.net/tag/hon-joseph-wirba/)*,*[**Nov. 21 strike**](https://bamendaonline.net/tag/nov-21-strike/)*,*[**SDF**](https://bamendaonline.net/tag/sdf/)*,*[**strike**](https://bamendaonline.net/tag/strike/)

Ten years ago, the then Minister of Justice, Ahmadou Ali, told Hon. Joseph Wirba that Anglophones had gone to La Republique.

This statement had not gone down well with the MP for Jakiri in Bui Division, Northwest Region. It was an inflammatory response, to say the least, to the SCNC crisis which had broken out in the Northwest where gendarmes tortured people.

“Sitting with him in his cabinet, I told the Minister that my people have been suffering a lot of injustice for the past 40 years. I told him that if they do not initiate dialogue, the problems will end up breaking Cameroon,” Wirba said.

According to Hon. Wirba, the Minister responded thus: “Mr. Wirba, it is your people (Anglophones) who came to us.”

Wirba told the National Assembly that he interpreted the Minister’s statement to mean that since West Cameroonians accepted to join La Republique du Cameroun, they could be maltreated with impunity.

This memory came rushing to Wirba during the plenary sitting devoted to the 2017 budget recently at the National Assembly, when the Anglophone crisis got into the front burner at the hemi-cycle.

The MP stirred the brouhaha when he complained bitterly about the torture that gendarmes meted on students of the University of Buea recently.

Hon. Wirba exploded in anger soon after he mounted the rostrum on Friday, December 2.

“I am angry and incensed, almost at the point of losing my mind, that police tortured, raped and maimed children in Buea. Our ancestors trusted you but you have betrayed them in this union. We (West Cameroonians) will resist,” the MP thundered.

The vocal MP further quoted the former US President, Thomas Jefferson by stating that: “When injustice becomes law, resistance becomes duty.”

He continued: “I am declaring from this rostrum, officially; your law is injustice to my people (Anglophone), we will resist to the last man.”

Wirba said he had acquired proof that Government has designed a plan to kill the Anglophone culture, education and justice system.

He recalled that shortly before the former Minister of Territorial Administration and Decentralisation, Marafa Hamidou Yaya, Was jailed, he (Wirba) had complained to him about the brutal behaviour of the DOs, SDOs and the uniform officers in the Anglophone regions.

“I told Marafa that the DOs, SDOs and the military act like colonial masters and the forces of occupation. I pleaded with him by saying that the foundation of this country would be shaken to its very roots if nothing was done to stop this unscrupulous behaviour,” said Wirba.

The MP quoted Marafa as responding that if anybody does anything to undermine what the DOs, SDOs and the military are doing, he or she will be crushed.

Furthermore, the MP told the plenary sitting that a week ago he went and saw the Minister of Higher Education, Prof. Jacques Fame Ndongo, on the Anglophone crisis.

He said he told the Minister that he had sought audience to see the President to no avail. He then pleaded with the Minister to either take him to the President or take his very important message to him.

“I told the Minister that the current strike involving Anglophone teachers and lawyers is not the issue at stake.

I told him that the real issue is the maltreatment of Anglophones in the union and that only the President could solve the problem by resettling the foundation of the State,” he narrated.

The MP said he told the Minister that if government does not initiate dialogue on the Anglophone crisis, it will break Cameroon.

After listening to him, he went on; the Minister asked him what Anglophones would do if Government does not hearken to dialogue.

Wirba said after talking with the various ministers in private, he discovered that it is designed Government policy to suppress, oppress and subjugate West Cameroonians.

**Anglophones Not Slaves**

Seemingly overcome by anger, Wirba once more exploded at the rostrum: “The people of West Cameroon are not your slaves, they were not your slaves and they will never be!”

In reaction, the Ministers shifted uneasily on their seats as dead silence took hold of the House. Since the MP had used up the 10 minutes to make his claims as provided for by the standing orders of House Speaker, Hon. Cavaye Yeguie Djibril, attempted to stop him.

The Speaker hit the hammer on the table and told the MP that he had exhausted his time.

The MP fired back: “I am talking about the enslavement of my people and you are talking about time? Mr. Speaker, I will not leave this rostrum until I say my say.

By so doing, Mr. Speaker, I am saying that our resistance against injustice begins this minute. You will need the brutal gendarmes that are torturing the people of West Cameroon to remove me from here today.

In the spirit of Thomas Jefferson whom I quoted here, it is my duty to resist what you are telling me to do here now,” the MP fired.

He said it was also a duty of West Cameroonians in the circumstances to resist suppression, oppression and subjugation.

Said he: “Mr. Speaker, the reason why I am saying this, is because our people mean nothing to you in this union. How can the brutal torture of human beings that took place in Bamenda and Buea happen in the 21st century?”

He said the august Assembly; especially the Government bench was shocked at his remarks because there is a big difference between the French and the Anglo-Saxon systems.

He said the French system teaches people to fear their leaders while the Anglo-Saxon system teaches respect of leaders.

There was dead silence in the hall. The CPDM Parliamentary Group later broke the silence with humming of disapproval.

But Hon. Wirba fired on by saying that he does not fear the Speaker, the President of the Republic and Government, but rather has a lot of respect for them. He insisted that West Cameroonians will resist injustice with all their might even if Government brings in the French army to join their forces of occupation to crush them. After making his point, Hon. Wirba left the rostrum and took his seat.

But he rose to his feet in rage, once more, when one female CPDM MP took the floor and said she was shocked by the belligerent tone in the Bui MP’s submission.

For about 10 minutes, the entire House went into hurly-burly of shouting and booing by MPs. Some MPs asked the woman if the torture, maiming and the raping of female students in Buea by gendarmes was a normal thing to her.

Hon. Cavaye finally laid the matter to rest when he told the female MP to stop making any remarks on Hon. Wirba’s reaction.

<https://bamendaonline.net/anglophone-problem-rocks-national-assembly/>

1. **Anglophone Leaders Could Face the Guillotine**

*Added by*[**Bamenda Online**](https://bamendaonline.net/author/bamendaonline/)*on January 27, 2017.
Saved under*[**National**](https://bamendaonline.net/category/national-2/)*,*[**News**](https://bamendaonline.net/category/news/)*,*[**Northwest**](https://bamendaonline.net/category/northwest/) *Tags:*[**arrest**](https://bamendaonline.net/tag/arrest/)*,*[**Ayah Paul**](https://bamendaonline.net/tag/ayah-paul/)*,*[**Bar. Nkongho felix**](https://bamendaonline.net/tag/bar-nkongho-felix/)*,*[**detention**](https://bamendaonline.net/tag/detention/)*,*[**Dr. Fontem Niba**](https://bamendaonline.net/tag/dr-fontem-niba/)*,*[**Mancho Bibixy**](https://bamendaonline.net/tag/mancho-bibixy/)*,*[**military tribunal**](https://bamendaonline.net/tag/military-tribunal/)*,*[**police. detention**](https://bamendaonline.net/tag/police-detention/)*,*[**trial**](https://bamendaonline.net/tag/trial/)*,*[**trial. military**](https://bamendaonline.net/tag/trial-military/)

 The arrested Anglophone leaders would appear before the Yaounde Military Tribunal next week to answer charges on 8 counts levied against them. These charges trumped up  since January 25th against Bar. Nkongho Felix, Dr. Fontem Niba and Mancho Bibixy includes  hostility against the fatherland, secession, civil war, revolution, armed band, propagation of false information, attack on public officials and collective resistance.

The anti-terrorism law No.2014/028 of 23 December 2014 on the suppression of acts of terrorism in Cameroon states partially that “***whoever, acting alone as an accomplice or accessory, commits or threatens to commit an act likely to cause death, endanger physical integrity, cause body injury or material damage, destroy natural resource, the environment or cultural heritage with intent to…intimidate the public, provoke a situation of terror…disrupt the national functioning of public services…create widespread insecurity in the country, shall be punished with a death penalty***…” .

Initially announced as a law against the Boko Haram Group, the real intend of the law is now becoming apparent. According to the Le Jour newspaper of January 27, 2017, the paper noted that the investigating judge at the Military Tribunal accuses Bar.  Nkongho, Dr. Fontem and Mancho Bbc of intentions of intimidating the state to provoke a situation of terror to compel the Government adopt the proposals put forward by the so called Anglohone Civil Society Consortium, disrupt the normal functioning of public services from providing essential services to the population, create a crisis situation among the population and to create a popular rebellion in the country.

According to Articles 74 and 96 of the Criminal Code, the accused are considered to be criminally responsible for the acts cited above. However, Mr. Nkongho, Dr. Fontem and Mr. Mancho Bibixy enjoy the presumption of innocence.

<https://bamendaonline.net/anglophone-leaders-could-face-the-guillotine/>

1. **Anglophone Crises: Prosecutor Playing Games With Detainees**

*Added by*[**Bamenda Online**](https://bamendaonline.net/author/bamendaonline/)*on June 26, 2017.
Saved under*[**News**](https://bamendaonline.net/category/news/)*,*[**National**](https://bamendaonline.net/category/national-2/)*,*[**Uncategorized**](https://bamendaonline.net/category/uncategorized/)

It has emerged from from an online video circulated on social media that the state prosecutor is deliberately stalling the legal trial of the detained anglophone leaders and journalists held at the Yaoundé Kodengui Maximum prison. In the video, Mancho Bibixy seen interviewed with a hidden camara says neither the state prosecutor at the Military tribunal or judicial investigators pressing a case against them have interrogated or questioned them since their arrest last January.

This new revelation  seems to indicate that the state has no case against them and is applying a dilatory tactics to drag the case for as long as possible, hoping to find a solution somewhere in between.

Mancho Bibixy, in this online video promises to spit venom whenever the courts would decide to question him. Speaking in Pidgin English he said he had known beforehand that he would be arrested because they have tried to do so unsuccessfully eight times before his arrest.

The Anglohone crisis hit top speed on November  21, 2016 when teachers decided to down tools and join striking lawyers to demand for some sweeping changes in the English educational system and when Mancho Bibixy launched his coffin revolution on the same day at the Liberty Square Bamenda.  The rulling CPDM later added more salt to injury when it unsuccessfully tried to hold a mass rally in Bamenda on December 8, 2016, leading to at least four deaths and several others injured. The crisis soon degenerated to general disobedience when the consortium leaders were arrested in January this year, leaving in its wake, a crippling ghost town that continue to paralyses economic activities in the two Anglophone regions.

By Fokum Emmanuel P in Yaounde.

<https://bamendaonline.net/anglophone-crises-state-playing-games/>

1. **Angophone Crisis: Gov’t Dispatches SOS Team to US**

*Added by*[**Bamenda Online**](https://bamendaonline.net/author/bamendaonline/)*on August 1, 2017.
Saved under*[**News**](https://bamendaonline.net/category/news/)*,*[**National**](https://bamendaonline.net/category/national-2/) *Tags:*[**Abongwa Fozo**](https://bamendaonline.net/tag/abongwa-fozo/)*,*[**Anglophone crisis**](https://bamendaonline.net/tag/anglophone-crisis/)*,*[**anglophone education**](https://bamendaonline.net/tag/anglophone-education/)*,*[**December 8 strike**](https://bamendaonline.net/tag/december-8-strike/)*,*[**Elvis Ngolle Ngolle**](https://bamendaonline.net/tag/elvis-ngolle-ngolle/)*,*[**Ghogomu Paul**](https://bamendaonline.net/tag/ghogomu-paul/)*,*[**lawyers' strike**](https://bamendaonline.net/tag/lawyers-strike/)*,*[**Nov. 21 strike**](https://bamendaonline.net/tag/nov-21-strike/)*,*[**Paul Biya**](https://bamendaonline.net/tag/paul-biya/)*,*[**teachers' strike**](https://bamendaonline.net/tag/teachers-strike/)

 A roadblock with placard during recent streets decrying Anglophone marginilization[ BamendaOnline Pictures]

Three members of government will travel to the United States this week following the content of a letter sent by the Prime Minister Philemon Yang to Ambassador Tommo Monthe, Cameroon’s Permanent Representative to the United Nations.

The Director of Cabinet at the Prime Minister’s office, Ghogomu Paul Mingo, former cabinet minister and Director of the CPDM Academy Elvis Ngolle Ngolle and the technical adviser to the Prime Minister's office, Professor Fabien Nkot, will travel to the United States from the 3rd to 9th of August 2017.

According to the letter, their mission is to provide Cameroonians living in the US and the American authorities, clarification on the situation prevailing in the Northwest and South-West Regions of the country.

The US has recently taken some interest in the crisis with some members of Senate writing to the State Department to look into human right abuses by the Cameroon government on its Anglophone community.

President Biya with this latest offensive intends to swell the Diaspora and international opinion towards government’s side in the crisis which it believe has been greatly shaped up to now by the views of the Cameroonian Anglophone community abroad.

The crisis which started with a lawyers strike and then a teachers’ strike in November 2016 is showing no signs of weakening. The government has so far put up a nonchalant altitude towards the crisis, with the vain hope of time taking away the stink out of the disgruntled Anglophone community’s anger.

Before reaching this dead end, the government had taken some measures in addressing the crisis. The creation of a national commission on bilingualism, the announced recruitment of 1000 bilingual teachers,  creation of an English division in ENAM, the redeployment of contested French teachers  and magistrates in some English schools and courts and the release of some detained Anglophones arrested in the heat of the crisis.

These moves have been greeted as insufficient by some and others continue to hold on to their rage, citing mistrust of the administration as a reason. A majority of Anglophones continue to maintain that if the strike leaders and others arrested and detained in Yaoundé because of the crisis are not released, there may never be genuine dialogue and reconciliation. There are still loud calls for a federal system of government as a solution to the crisis. While this call is echoed at one end, at the other end are many pushing for separation as the best way out.

It is in this atmosphere of unease that President Paul Biya sends these trusted lieutenants to the United Nations to take stock of the situation abroad and try to find a way to resolve this socio-political imbroglio which has all the signs of a prolonged conflict that may greatly affect the very foundation of

<https://bamendaonline.net/angophone-crisis-govt-dispatches-sos-team-us/>

1. **Anglophone Problem is Historical, Needs a Historical Lens-USDP Chairman.**

*Added by*[**Bamenda Online**](https://bamendaonline.net/author/bamendaonline/)*on September 18, 2017.
Saved under*[**News**](https://bamendaonline.net/category/news/)*,*[**Politics**](https://bamendaonline.net/category/politics/) *Tags:*[**Anglophone crisis**](https://bamendaonline.net/tag/anglophone-crisis/)*,*[**Prince Michael Ngwese Ekosso**](https://bamendaonline.net/tag/prince-michael-ngwese-ekosso/)*,*[**USDP**](https://bamendaonline.net/tag/usdp/)

***The chairman of the United Socialist Democratic Party Prince Michael Ngwese Ekosso has called on the government of Cameroon to look back at the foundation that formed this Republic and address the root causes else the current stalemate will not be broken. He blames the current prevalence on the divide and rule tactics implore by the state of Cameroon. In an exclusive interview with Ndi Tsembom Elvis, he stated the following****.*

***Q. What is your party’s stand on the current Anglophone Crisis?***

USDP believes that the Anglophone crisis stems from the 1961 political manipulation by the Ahidjo and Foncha deal which deal which went very bad and as the Secretary General of the UN cautioned the Cameroonian delegation which visited it recently, the root cause of the Anglophone crisis is a critical step towards the identification of the root cause. From that perspective therefore the stance of the USDP simply follows the suggestions of the UN S.G. In other words, the Anglophone crisis is historical and needs a historical lens to look through and find a sustainable solution.

***Q. What is your Assessment of the Methodology Used to Solve the Anglophone Problem?***

Evidences abound on the methods which the regime of Mr. Paul Biya has been using to solve problems in Cameroon which is not new to Cameroonians. They are three basic methods the regime has been using to solve problems in Cameroon;

- The military repressive method
- The divide and rule policy and
- The wait and see tendency.

That is the same way the USDP perceives the regime is using to solve the Anglophone crisis. Unfortunately for them this around, those methods are outdated which doesn’t work for this generation anymore.

***Q. Since you say these methods have failed, what can be done to restore normalcy in the Anglophone Regions?***

USDP has always been preaching on the need for comprehensive dialogue since the beginning of the crisis. Any leadership which cannot dialogue with its people is a failed leadership. USDP has written severally to the President of the Republic, the Secretary General at the Presidency, the Prime Minister, Minister of Higher Education, Territorial Administration, CONAC, Communications, Defense etc, suggesting that the Anglophone crisis does not need guns and bullets to be solved. Unfortunately, a deaf ear has been given to our suggestions. USDP stand for dialogue today, tomorrow and forever on this matter.

***Q. What are the ambitions of your party at the eve of Elections?***

USDP was the first political party to declare openly its ambition for the 2018 multiple elections. We must understand that next year is pregnant with very many and very serious political decisions which Cameroonians are called upon to make. From the Presidential, senatorial, parliamentary and municipal, the year will be very tense and complex.

USDP had begun since in 2015 to draw attention of both national and international communities on the need for these elections to be transparent, free and fair. USDP seeks to bring in a new Nation in Cameroon where young and dynamic Cameroonians will be seen into political offices for the good for the good of our fatherland. So USDP is identifying young dynamic leaders who can run for political offices like Mayors, MPs, Senatorial, and up to the Presidency. We have already begun identifying key leaders who are ready to run under the USDP in various constituencies especially in the North West and South West regions. So, we will like to invite whosever have a political determination to run for any political office but does not have space in the already saturated traditional political parties in Cameroon to come and USDP now because time waits fir nobody.

***Q. For how long has your party been in existence?***

USDP has been in existence since 2011 and has made serious impact on the political in Cameroon. We are represented in all of the 10 Regions of Cameroon, with headquarters in Yaounde. The party has a massive following in the two Anglophone regions in Cameroon and the Diaspora. We are very confident to crush the CPDM in any election in those regions

<https://bamendaonline.net/anglophone-problem-historical-needs-historical-lens-usdp-chairman/>

1. **Anglophones Block Biya In New York Hotel**

*Added by*[**Bamenda Online**](https://bamendaonline.net/author/bamendaonline/)*on September 23, 2017.
Saved under*[**News**](https://bamendaonline.net/category/news/)*,*[**National**](https://bamendaonline.net/category/national-2/) *Tags:*[**Anglophone crisis**](https://bamendaonline.net/tag/anglophone-crisis/)*,*[**Cameroon**](https://bamendaonline.net/tag/cameroon/)*,*[**December 8 strike**](https://bamendaonline.net/tag/december-8-strike/)*,*[**New York Ambazonian protest**](https://bamendaonline.net/tag/new-york-ambazonian-protest/)*,*[**Nov. 21 strike**](https://bamendaonline.net/tag/nov-21-strike/)*,*[**Paul Biya**](https://bamendaonline.net/tag/paul-biya/)*,*[**Sept 22 Uprising**](https://bamendaonline.net/tag/sept-22-uprising/)

A crowd of Southern Cameroonians (Amazonians) stormed the hotel where president Paul  Biya and wife Chantal are staying in New York. The protesters blocked the hotel's entrance, preventing Paul Biya and his delegation from making the slightest move. According to reports, the President of the Republic reportedly instructed the Cameroon ambassador to the United States to ask the US government to disperse the demonstrators.

This demonstration came a few hours after those by the Anglophone population in several cities, towns and villages of the Southern Cameroon.

President Biya is in New York since Thursday September 21, 2017, to take part in the 72nd United Nations General Assembly (UNGA72). On Friday he addressed the UNGA72  but did not mention the crisis in the Anglophone Region. The hall was very scanty during his speech. It’s not clear whether it was a boycott or mere coincidence that many delegates had abandoned their seats.

<https://bamendaonline.net/anglophones-block-biya-new-york-hotel/>

1. **Anglophones begin to Rise Against Gov’t’s Peace Mission**

*Added by*[**Bamenda Online**](https://bamendaonline.net/author/bamendaonline/)*on October 16, 2017.
Saved under*[**News**](https://bamendaonline.net/category/news/)*,*[**National**](https://bamendaonline.net/category/national-2/) *Tags:*[**Anglophone crisis**](https://bamendaonline.net/tag/anglophone-crisis/)*,*[**Ebonji**](https://bamendaonline.net/tag/ebonji/)*,*[**Kupe Muanenguba**](https://bamendaonline.net/tag/kupe-muanenguba/)*,*[**SW region**](https://bamendaonline.net/tag/sw-region/)*,*[**Tombel**](https://bamendaonline.net/tag/tombel/)

Many youths of Ebonji, Tombel Sundivision in the  Kupe Muanenguba Division of the South West have taken to the streets of the locality with peace plants and chanting "no bribery, no bribery" in response to a government move to  deplored CPDM elites in all 13 divisions of the Northwest and Southwest regions to meet with the disgruntle population to address the on-going Anglophone Crisis.

The Youths of Ebonji see in this an attempt by the government to bribe the locals and have their way in the face of the current crisis. The youths accompanied by women, and some elders marched through the street of the town this morning, some with peace plants and others with the Ambazonia flag and whistles singing at the top of their voices.

The Prime Minister Philomon Yang under the instruction of the Head State Paul Biya signed a long list of names mostly of CPDM elites sending them to meet and dialogue with the locals in their various localities.

The released leader of the disbanded Anglophone Consortium, Bar. Felix Nkongho relased a statement condemning the move saying “we strongly condemn, reject and disassociate ourselves with these moves”  adding that “to appease the population, the government is called upon to release all peaceful protesters, account for the number of death,  restore complete internet access and call for a round table dialogue in the presence of the United Nations”

Its fear, such demonstrations will likely spread to other localities despites government’s tight control on the media and an internet blackout in most parts of English Cameroon.

By Abongwa Fozo

<https://bamendaonline.net/anglophones-rise-against-govts-peace-mission/>

1. **Arrest of Ayuk & Co, What Implications For Anglophone Regions**

*Added by*[**Bamenda Online**](https://bamendaonline.net/author/bamendaonline/)*on February 17, 2018.
Saved under*[**Law & Human Rights**](https://bamendaonline.net/category/society/law-human-rights/)*,*[**News**](https://bamendaonline.net/category/news/) *Tags:*[**arrest**](https://bamendaonline.net/tag/arrest/)*,*[**detention**](https://bamendaonline.net/tag/detention/)*,*[**Julius Ayuk Tabe**](https://bamendaonline.net/tag/julius-ayuk-tabe/)*,*[**nigeria**](https://bamendaonline.net/tag/nigeria/)*,*[**scnc**](https://bamendaonline.net/tag/scnc/)*,*[**sisiku**](https://bamendaonline.net/tag/sisiku/)*,*[**southern cameroon**](https://bamendaonline.net/tag/southern-cameroon/)

  Following the arrest of the Julius Ayuk Tabe President of the Ambazonia Interim Government, and some of his close collaborators in Abuja on January 5, 2018 by the Nigerian Special Forces and their subsequent extradition to Cameroon, a dark cloud seems to have moved over both Anglophone regions of Cameroon, provoking a series of attacks by unidentified individuals, a heavy crack down on the civilian population by the military and a series curfew and ghost towns.

The exact circumstance leading to their arrest, their where about and the conditions of their detention still remains an issue of mere speculation.  These unanswered questions in the mind of many Anglophone Cameroonians who are directly involved in the crisis can best be addressed by the Nigeria and Cameroon governments but both have elected to play the Ostrich further annoying and incensing the people of these two regions who have been hoping a solution to the crisis may be arrived at through dialogue, more than 15 months since the first signals of the Anglophone crisis were fired.

 The Anglophone crisis was inadvertently fuelled by the heavy crack down employed by government through the military during the massive street demonstrations of September 22nd,  October 1 and December 8th incidents which left many casualties amongst people who came out to express their frustrations with the current system and way they are governed.  The Killings in parts of the Anglophone regions simply barred the people from freely demonstrating and expressing their views and pushed them into the bushes which has taken us to where we are today.

From a socio-political and economic point of view, one would agree in clear terms that the recent arrest of the Ambazonian leaders coupled with the controversies surrounding their where about is now taking the crisis to yet another level whereby genuine steps towards conflict resolution are not taken, the crisis way spiral out of control which may end badly for Cameroon.  We have all seen the crisis metamorphosed from street demonstrations to burning of school and crippling ghost towns after the arrest of the Consortium leaders, then to the attack on security forces as the crisis drag on. Today, with the arrest of Ayuk and Co. the crisis has moves from simple hit and run attacks to very bold attacks on security forces and installations to kidnapping of administrative official, a big hit on the government if we must accept.

According to International Crisis Group report, an N.G.O based in Belgium, within the space of three months, 23 Soldiers and 90 Civilians have been killed with the death toll on both sides increasing as the crisis drag on. The villages of Dadi, Kwa-Kwa, Bole, Bangem, Batibo, Belo and Bamenda just to name a few have witnessed attacks and killings of security forces.

There is panic within security forces as rumours spread amongst their ranks that the secessionist forces employ black magi known as the “Odey-Shi’ boys who are said to be bullet with the ability to appear and disappear after their operations. This surely explains why the military has also decided to transfers their aggression to the civilian population with a heavy crack down on the civilian population whenever a colleague is killed.  They have descended  with no mercy to the unfortunate one in areas where one of theirs were killed, especially in remote areas where its difficult to verify the authenticity of their actions.

With gross human right violations perpetrated by the military on the population, coupled with cases of looting and other forms of brutality, several residents where security officials were killed have either fled to the bushes, into neigbouring villages or have crossed the border into Nigeria. The present crisis resurrects the memories of the UPC uprising after independence which was heavily crack down by security forces. But that was during an era where Cameroon was still very remote, the general population was less educated and the spread of information was not as wide spread as today. It’s now becoming abundantly clear that we are not far off from a full blown civil war if we don’t chose the path of dialogue.

 But what many fear today is that the path to this dialogue may still be miles away after the Head of State in his message to the youths on the eve of the Youth Day instead announced that calm is gradually returning to the Anglophones regions, a statement which is far from the truth if present happenings and the imposition of curfews is taken into account.  We are slowly losing it and this may be the time for Anglophone leaders from irrespective of their background to rise as one people and speak with a united voice for things to happen. I strongly believe that if this was happening in the “Grand North” a solution would have been sorted out long before we reach where we are today. For once let us put our heads together for a common good if we really want to harvest votes from these very people.

**By Pedmia Shatu T.**

<https://bamendaonline.net/arrest-ayuk-co-implications-anglophone-regions/>

1. **CPP RELEASE ON THE ALL ANGLOPHONES**

*Added by*[**Abongwa Fozo**](https://bamendaonline.net/author/fozo/)*on August 3, 2018.
Saved under*[**National**](https://bamendaonline.net/category/national-2/)*,*[**News**](https://bamendaonline.net/category/news/) *Tags:*[**CPP**](https://bamendaonline.net/tag/cpp/)*,*[**press release**](https://bamendaonline.net/tag/press-release/)

The CPP benevolently welcomes the initiative of a third General Conference of Anglophones jointly held by His Eminence Christian Cardinal Tumi, Reverend Babila George Fonchang, Imam Tukur Mohammed Adamu and Imam Alhadji Mohammed Aboubakar whose organization will be coordinated by Simon Munzu.

This conference is a good thing insofar as it reflects a willingness to dialogue in order to contribute to a resolution of the deep crisis that has now turned the Nord West and South West regions into civil war. It is also worthy to commend the fact that, it’s a desire to act, to face a critical and complex situation, to try to find a way out whereas every day, one is tempted to despair vis-à-vis the escalation of violence.

On the one hand, it is initiated in a context where the population remain hostage of extreme violence, violence which creates a lot of misery victims and enormous losses.

On the other hand, it is undoubtedly a beacon of hope for all who are thirsty for peace and a peaceful resolution of this dispute whose causes go back to the mismanagement of our colonial heritage, the non-application of our various fundamental laws and the persistence of bad governance.

The CPP congratulates this initiative of dialogue between Cameroonians of the North West and South West regions, as a prelude to a national dialogue that includes all Cameroonians.

The CPP shares the urgent need to create conditions for a Dialogue. This means reaching a ceasefire, taking steps to ease the tension and starting the long road to justice, truth and reconciliation.

The CPP encourages the promoters of this dialogue to persevere despite the obstacles. Criticisms will be issued and they must be taken into account in order to succeed in this consultation. But they have to forge on with determination. Those who want peace have to be more courageous and determined than who by cynicism or despair feel at ease in chaos.

The CPP is convinced that this situation of profound crisis and civil war raises the question of rebuilding the nation in terms of the constitution, institutions, governance, wealth distribution and living together. The CPP is convinced that no tinkering, half-baked or superficial solution can stop the country’s ongoing implosion.

The CPP, as proposed by the Stand Up For Cameroon movement of which it is a member, is convinced that only a democratic political transition will allow us to deal in depth with the fundamental problems that this critical situation allows us to touch.

The CPP, through its militants and sympathizers from all over the country, is available to any initiative whose goal is to accelerate the rebuilding of the nation of Cameroon for the good of all its sons and daughters.

Instead of complaining about darkness, let’s light a candle!

Let’s act together for a real national dialogue that is inclusive, participatory, sovereign, public and facilitated by Cameroonian personalities.

For the Cameroon People’s Party

KAH WALLA
NATIONAL CHAIRPERSON

<https://bamendaonline.net/cpp-release-on-the-all-anglophones/>

1. **What to a Marginalized, Suffering, and Homeless Anglophone is the meaning of May 20**

*Added by*[**Bamenda Online**](https://bamendaonline.net/author/bamendaonline/)*on May 24, 2019.
Saved under*[**Uncategorized**](https://bamendaonline.net/category/uncategorized/) *Tags:*[**Colbert Gwain**](https://bamendaonline.net/tag/colbert-gwain/)*,*[**Headline**](https://bamendaonline.net/tag/headline/)*,*[**opinion**](https://bamendaonline.net/tag/opinion-2/)*,*[**The Colbert Factor**](https://bamendaonline.net/tag/the-colbert-factor/)

The Colbert Factor

This reflection is inspired by the fact that Cameroonians are this week celebrating national unity day. While others are calling simply for deep reflection following the escalation of violent extremism in the English speaking parts of Cameroon that threaten the very foundations of national unity, others seem so insensitive to the point that they are just interested in celebrations, that is, wining and dining, in the pure sense of it. This, on grounds that what unites Cameroonians is more important that what divides them and also that; there is nothing wrong with Cameroon that cannot be corrected with what is right with it.

It is the more informed by the fact that while only a year ago, Anglophone activists were simply insisting that Cameroon must celebrate its diversity, the government in Yaounde was insisting and, at the top of their voices, that Cameroon had since become a homogeneous society given that we have simply become Cameroonian, no Anglophone, no Francophone.

It is also inspired by the fact that although government has since moved from denial to acceptance of the existence of an Anglophone Problem, the denial and reluctance to accept dialogue on the form of State as a sure solution to the crisis since led to violent extremism and consequently, killings on both sides with no end in sight. Such escalation in violence which has resulted in many wounded and others fleeing the homes, defeats the very purpose and significance of May 20 celebrations.
As a kid, I looked forward to every May 20. For me, it was all about campfire, the eating of ‘benye’ or puffpuff, sugar cane and assorted sweeties. For me, 20th May was all about travelling from Muteff, the local village kaleidoscope, to Fundong, Divisional headquarters, matching past top administrative authorities and meeting new friends. I was as unreflective about the meaning of this national day as anyone could possibly be.
Consequently, just as I remember where I was when I learned of the resignation of President AmadouAhidjo and the swearing-in of his constitutional successor, incumbent President Paul BIYA, so too do I remember where I was and what I was doing when the first opposition political party, SDF, was launched with the primary objective of righting the wrongs of the Yaoundé regime on Cameroonians in general and Anglophones in particular.
Now I have come of age. I have heard and read a lot about May 20, 1972. Since that reading, I have never thought of May 20 in the same light. To me, this national holiday is more of a day for reflection rather than a day for celebration. Reflection on how far we, as a country and people have come, and where we must now go.
I need not enter further into the events that led to the putting in place of May 20 as a national day. Many of you readers understand them better than I do. You could instruct me in that regard. That is a branch of knowledge in which you feel, perhaps, a much deeper interest than your humble writer. Suffice to say that the causes which led to the controversy in Foumban in 1972 that led to May 20 as our national day, have never lacked for a tongue. They have all been taught in schools, from primary to university. They have been narrated at your firesides, unfolded from your protest marches, and thundered from newspaper rooms and newsstands. They are as familiar to you reading me now as household words. They form the staple of your national poetry and eloquence.
So, what to a marginalized, suffering and homeless Anglophone is May 20? May 20 to many an Anglophone is the day they lost their identity as a people and have been struggling tooth and nail since 2016, to reassert it. It is the day their claim to a federated state was lost. To a marginalized Anglophone May 20 is the day Anglophones in Cameroon were abused, marginalized and their cultural identity erased.
Arrested, detained and later released Ayah Paul Abine, while arguing that since no people are stateless, and since Anglophones have no option at moment, they should continue to celebrate May 20. But that the greater Cameroon should not see in Anglophones joining in the celebrations the fact that Southern Cameroons was not raped, for as he puts it, the fact that somebody reaches ecstasy or orgasm during rape does not obliterate the act of rape.
Nwachang Thomas, the dissident researcher and historian argues that 20th May 1972 was an invention to replace the treaty which the Republic of Cameroun did not sign with Britain on Southern Cameroons, just like Britain signed with China over Hong Kong. To Nwachang, when Yaoundé authorities painfully found out that without a treaty, the Union with Southern Cameroons was illegal, they improvised the Referandum to justify that in spite of no treaty, Southern Cameroonians voted in a referendum to join La Republique.
The dissident researcher and historian concludes that the inescapable challenge for Yaoundé authorities is to explain whether it was 1st October 1961 that was Independence and Reunification Day or May 20, 1972, that was referendum and reunification day, or both. He wonders why after indoctrinating our children in primary and secondary schools with such history, the government still went ahead in 2013 to celebrate the 50th anniversary of Reunification in Buea, where President Paul Biya recognized Buea, as once the capital of both Southern Cameroons and German Kameroun.
To an Anglophone therefore, May 20 can only mean marginalization, suffering, extra-judicial killings, maiming, poor infrastructural development, second class citizenship and political subjugation.

That was the Muteff Boy’s take.

<https://bamendaonline.net/what-to-a-marginalized-suffering-and-homeless-anglophone-is-the-meaning-of-may-20/>

1. **HYSACAM Resumes Services In Face of Impending Garbage Crisis In Bamenda**

*Added by*[**Bamenda Online**](https://bamendaonline.net/author/bamendaonline/)*on December 3, 2019.
Saved under*[**Human Interest**](https://bamendaonline.net/category/society/human-interest/)*,*[**News**](https://bamendaonline.net/category/news/) *Tags:*[**Bamenda FoodMarket**](https://bamendaonline.net/tag/bamenda-food-market/)*,*[**Hysacam**](https://bamendaonline.net/tag/hysacam/)*,*[**keep Bamenda Clean**](https://bamendaonline.net/tag/keep-bamenda-clean/)

     It’s another busy day at the Bamenda  Food market ,  taxis, commercial motorbikes, traders and sellers alike try to navigate their way through a small part of the road left usable by a huge pile of smelly garbage. Most pedestrians are forced to  cover their noises in their hands as they try to find a way pass a huge heap of rotten mesh of cabbage, tomatoes, pears, water melon, orange,  celery, onions, leaks  and other fresh food items that has been left unattended for months by the garbage clearing company-Hysacam.

This is no longer an uncommon sight in Bamenda. Everywhere across the metropolis are abandoned mountains of domestic and at times industrial waste left to suffocate the air of the surrounding area with a pungent irritating smell, posing serious health threats to the population.  Not a single neighbourhood is left out. This has forced some nearby residents who could no longer stomach the stench to result to burning the garbage leading to huge smoke bellowing across some areas of town. Other have have taken the option to dump their domestic waste into rivers and streams, posing another environmental hazard, especially when it rains.

Hysacam front loader and trucks cleaning garbage at the Food Market

But recently, Hysacam decided to act. Since the 26 of October, Hysacam has embarked on a mission to ride Bamenda of its garbage mountains.  Traders and buyers at the Food market were relieved when they saw Hysacam trucks and workers rolled in to start clearing the several heaps of garbage at the Food market even though it presented a moment of un-comfort for those who were present during the exercise.

According to Mr. Zuma Joseph Director of Hysacam Bamenda who was amongst those watching the entire cleanup process, the year 2019 has been a difficult one for the cooperation, particularly with the ongoing Anglophone crisis. He said a series of incidents has pushed them to halt operations three times this year. He assured us that they will do their best to always keep Bamenda clean.

Many traders at the Food Market expressed their delight to see the huge piles of heap disappeared from the streets of the market. Ngwe Adeline, a road side vendor near one of the area that was cleared said she is relieved from the uncomfortable odour that use to emanate from the garbage and prays that Hysacam should constantly do it work because the stench was driving away her customers.

Hysacam was forced to halt operations several times due to insecurity. Some of its workers and even trucks were taken hostage by gunmen. Some gun men on their path accuse Hysacam workers of collaborating with security agents to attack.  Many Bamenda city dwellers hope this recent operation will bring an end to their garbage disposal nightmare and consequently a cleaner Bamenda.

By Bathsheba Everdine in Bamenda

<https://bamendaonline.net/hysacam-resumes-services-in-face-of-impending-garbage-crisis-in-bamenda/>

1. **Cameroonian Conflict ‘World Most Neglected crisis’**

*Added by*[**Bamenda Online**](https://bamendaonline.net/author/bamendaonline/)*on June 11, 2020.
Saved under*[**National**](https://bamendaonline.net/category/national-2/)*,*[**News**](https://bamendaonline.net/category/news/) *Tags:*[**Anglophone crisis**](https://bamendaonline.net/tag/anglophone-crisis/)*,*[**Norwegian refugee council**](https://bamendaonline.net/tag/norwegian-refugee-council/)

A roadblock with placards during streets protest in 2016 decrying Anglophone marginilization (archived pics)

Cameroon’s conflict with English-speaking separatists has been rated as the most-neglected crisis in the world for the second year running by the Norwegian Refugee Council.

The African nation’s Anglophone minority are fighting for autonomy after what they term as decades of marginalisation by the central government and the French-speaking majority.

Some of the separatists have declared autonomy over two regions – a move rejected by President Paul Biya.

Cameroon has also been hit by a refugee crisis from the neighbouring Central African Republic (CAR) and continuous attacks in the north from the Islamist militant group Boko Haram.

The annual list of neglected crises is based on three criteria: lack of funding, lack of media attention, and political and diplomatic neglect.

There are nine African nations in the list of 10, with Venezuela being the only non-African this year.

The report also highlighted the ongoing armed conflict in the Sahel region, that includes Mali, Burkina Faso and Niger, which has resulted in the deployment of military forces from a host of European nations.

Niger and Burkina Faso appeared on the list for the first time.

Humanitarian crises in all countries mentioned in this year’s list are expected to worsen throughout 2020, compounded by the global coronavirus pandemic.

<https://bamendaonline.net/aanglophone-crisis-worlds-most-neglected/>

1. **Reconstruction, the Pathway to Peace In Crisis Hit NWR**

*Added by*[**Bamenda Online**](https://bamendaonline.net/author/bamendaonline/)*on June 24, 2020.
Saved under*[**News**](https://bamendaonline.net/category/news/)*,*[**Northwest**](https://bamendaonline.net/category/northwest/) *Tags:*[**Anglophone crisis**](https://bamendaonline.net/tag/anglophone-crisis/)*,*[**Donatus Njong**](https://bamendaonline.net/tag/donatus-njong/)*,*[**Northwest**](https://bamendaonline.net/tag/northwest/)*,*[**Northwest development**](https://bamendaonline.net/tag/northwest-development/)*,*[**Paul Tasong**](https://bamendaonline.net/tag/paul-tasong/)*,*[**reconstruction**](https://bamendaonline.net/tag/reconstruction/)

A vehicle destroyed as a result of the anglophone crisis

 The population of the Northwest region have been called upon to embrace the reconstruction agenda of The Head of State, President Paul Biya as a way back to peace and normality. Mr.  Paul Tasong, Coordinator of the Presidential Plan for the Reconstruction and Development (PPRD) of the Northwest and Southwest regions was speaking In Bamenda on June 22, 2020 as he addressed administrative, traditional, religious and opinion leaders of the region.

 “Reconstruction is a pathway to peace. It will be done gradually from the secured areas to the most affected” Paul Tasong said, adding people “cannot live on assistance for ever”.

He said he was in Bamenda for a week long consultation and awareness campaign. This will involved all stakeholders from the seven divisions of the Northwest region.

Bamenda City Mayor, Paul Achobong  in his welcome speech likened the move from the PPRD as a  silver lining in a dark cloud. He called for “holistic development”. Mr. Achobong cited the Bamenda-Babadjou road and the Municipal Stadium as visible projects that can go a long way to pacify the people of the Northwest region.

The Anglophone crisis that degenerated from a lawyers’ and teachers’ strike in November 2016 has left a big scar on almost every one and the NW region as a whole. Homes, bridges, hospitals, markets, schools, businesses have been burn down, vandalized, closed or looted.

Minister Tasong’s mission is to creating awareness and sensitized the population of the region on the reconstruction path set forth by government. Its aimed at reaching out to the beneficiaries and other stakeholders in the field, to highlight all the construction activities envisaged,  to outline the process and mechanism for the implementation of the plan, to define the methods of organisation and supports from the various beneficiaries of the plan and also to ensure ownership of the plan by the beneficiaries.

He will during his weeklong stay in the region hold separate meetings with administrative heads, traditional and religious leaders, village development associations and other stake holders.

Paul Tasong was appointed by prime Minister Joseph Dion Ngute along side  Njong Donatus as coordinator and deputy respectively on April 3, 2020. Their mission is to spearhead the reconstruction and development of the Northwest and Southwest regions ravaged by closed to four years of fighting. The budget set aside for the reconstruction plan stands at 89.6 billion Francs CFA.

By Bathsheba Everdine

<https://bamendaonline.net/reconstruction-key-to-peace-in-nwr/>

1. **Ambazonia War: Destroying Anglophone Regions’ Economies (important)**

*Added by*[**Bamenda Online**](https://bamendaonline.net/author/bamendaonline/)*on September 4, 2020.
Saved under*[**News**](https://bamendaonline.net/category/news/)*,*[**Features**](https://bamendaonline.net/category/special-reports/features/) *Tags:*[**ambazonia**](https://bamendaonline.net/tag/ambazonia/)*,*[**Anglophone crisis**](https://bamendaonline.net/tag/anglophone-crisis/)*,*[**Cameroon economy**](https://bamendaonline.net/tag/cameroon-economy/)*,*[**economy**](https://bamendaonline.net/tag/economy/)*,*[**Northwest development**](https://bamendaonline.net/tag/northwest-development/)

**Cameroon Says Conflict Destroying Anglophone Regions’ Economies**

Cameroon says the economies of its troubled English-speaking western regions are collapsing as a result of the country’s four-year separatist conflict.  Officials say the ongoing fighting has made tax revenues in the English-speaking Northwest region drop from $800,000 annually to just $1,000 last year. The lack of government funds has had devastating effects on the region.

Fotso Dominique, the most senior government economic official in the English-speaking Northwest region, says separatist fighters have succeeded in chasing customs and tax officials from almost all crossing points along the border with Nigeria.

Speaking on Cameroon state television, Dominique said there has been a 90% drop in imports of building materials, drugs, vehicles, electronics and basic commodities from Nigeria.  This, he says, while civilians have been deprived of basic supplies and state coffers left with huge shortfalls.

Bamenda Main Market- Open doors no trader, no buyer

“Before 2016, the customs duty collection was more than 200 million Francs [$ 363,000] in Donga Mantung and about 150 million [$ 273,000] from Menchum Division giving us a total of about 305 million [$552,000] per annum. As we talk, Donga Mantung last year collected less than 500,000 [$ 900] and nothing was collected from the Menchum area,” he said.

Cameroon’s government this month reported that the country’s second largest employer — the Cameroon Development Corporation — had abandoned most of its banana, palm oil, and rubber plantations.  It owes as much as a year’s worth of backpay to 6,000 of its 22,000 workers.

The Palm Oil Company PAMOL and other agro industrial companies say they are now heavily in debt.

Microfinance institutions that power the economies of Cameroon’s English-speaking regions say they are unable to recover $50 million in loans.

Merchants have either escaped to safer areas in the French-speaking regions or can not repay loans because their businesses are closed due to the fighting.

The separatists have said on social media that their intention is to ruin Cameroon government state coffers. Fighters say they want to make the English-speaking regions ungovernable until they obtain their independence.

Residents and businesspeople say anyone who disobeys the fighters’ calls for a lockdown or is seen paying taxes is subject to retribution.

Businessman Protus Awnaga says he almost lost his life for disobeying instructions from fighters not to go on a business trip on the week a lockdown was imposed.

“That is the most awful moment I have ever had in my life. Face to face with gunmen like this. And they ordered us out of the car. We saw our things being burnt, but we were even thankful to God because they should have burnt us with the car. It is terrible. It is deplorable,” he said.

Economist Tasoh Gerald says the consequences of the crisis weighs on the government but it is civilians who are caught in the fighting who suffer most. They include people whose businesses were either torched by separatists for disobeying their instructions to not pay taxes or those whose property was burnt by the military, which accused them of supporting the fighters.

“It has discouraged investments in this region. A fall in investments implies a rise in unemployment and a general fall in the standards of living. Also, most of the councils in these regions find it difficult to settle their debts and pay their workers,” he said. “Another consequence is the near collapse of the tourism sector. Most of the recreational areas and tourist sites are abandoned. Most of those in the working age group have migrated to other regions leaving behind the old and the young in the villages. This high migration implies less farm labor and consequently a fall in agricultural productivity in these regions.”

The suffering has not deterred neither the government nor the fighters. Both have maintained their positions for the past four years. The separatists are asking for the creation of a breakaway English-speaking state while the government maintains that Cameroon cannot be divided.

The United Nations says the conflict has killed more than three thousand people and displaced more than 500,000. Fifty thousand others are asylum seekers in neighboring Nigeria. 
 <https://bamendaonline.net/anglophone-crisis-hits-local-economic/>

1. **Yaoundé Results to Intimidation of Anglophones As Solution To Crisis**

*Added by*[**Bamenda Online**](https://bamendaonline.net/author/bamendaonline/)*on January 27, 2017.
Saved under*[**National**](https://bamendaonline.net/category/national-2/)*,*[**News**](https://bamendaonline.net/category/news/)*,*[**Northwest**](https://bamendaonline.net/category/northwest/) *Tags:*[**anglophone education**](https://bamendaonline.net/tag/anglophone-education/)*,*[**anglophones**](https://bamendaonline.net/tag/anglophones/)*,*[**arrest**](https://bamendaonline.net/tag/arrest/)*,*[**censorship**](https://bamendaonline.net/tag/censorship/)*,*[**detention**](https://bamendaonline.net/tag/detention/)*,*[**ghost towns**](https://bamendaonline.net/tag/ghost-towns/)*,*[**strike**](https://bamendaonline.net/tag/strike/)

The government of Cameroon has launched the next phase of its campaign to kill the spirit of the Anglophone uprising, with state security agents and some government departments proceeding to intimidation of the population through various means and the arrest of anyone suspected of talking about the strike.

Journalists in Bamenda in particular have been at the forefront of government’s brunt. Yesterday, Tim Finnian, the publisher of Life Time Magazine was picked up by several heavily armed security officials at the Sonac Street. He is accused of haven reported the dead of two of the Anglophone youths detained in Yaoundé.

Radio Hot Cocoa recently resumed broadcast after it was shut down by a regional order, while Radio Jakiri and Rainbow FM of Mbengwi have also suffered similar fate in the hands of administrators executing the will of Yaoundé.  Journalists in Bamenda, Kumba, Limbe and Buea are being followed by plain clothes security officials around town, while security officials are recording almost every broadcast on Radio in these towns and others in West Cameroon. This has created fear amongst some media promoters with some like Rush FM Radio Bamenda and Planet FM of Mbengwi voluntarily going off air as a means to avoid a clash with the authorities.

Security officials have also been going around parts of Up Station moving into houses and compounds to force pupils and students to go back to school. Down town, several youths have been arrested for merely grouping around their neighbourhood discussing about the prevailing situation in the country. Plain clothes uniform officers are now found at drinking spots, taxis, in the markets and at major junction, arresting individuals for merely talking about the teachers’ and lawyers’ strike. Such arrests have been reported in many neighbourhoods of Bamenda.

This midweek, two youths were arrested at the Mile III check Point at Up Station with their laptops on their way back from the West Region because they were suspected of going there to use internet lines to spread news of the Anglophone uprising. Bamenda Online was later informed that they were release after dishing out huge sums of money to buy their freedom.

The Ministry of Post and Telecommunications (MINPOSTEL) has been inundating mobile phone subscribers in these regions with SMS intimidating them of the consequences of spreading false information over the social media. Some of these SMS read “ Dear subscriber, you may be sentenced to 20 years in prison if found guilty or slander or propagating false declarations on the social media”, “dear subscriber, you incur  6 months to 2 imprisonment, and  or 5 to 10 million fine , if you publish or spread on the social media, information that you can’t prove” After discovering that the tone of the message was so harsh, the next round come with a softer tone like this one “dear subscriber, do not be an accomplice of disinformation or the destabilization of our country through the social media”

But contrary to all these the mode in the ground is more of defiance by the entire Anglophone community. The Ghost Towns still continued to be hugely respected despite the internet blackout, the arrest of Anglophone leaders and the threats issued out to press men and women to stay away from any radio and newspaper reports about the strike.

Some journalist and media houses continue to defy these orders and have continued to broadcast and print news about the crisis. Many journalists consider it a sacrifice for the struggle.

Before internet connections were suspended in the Northwest and Southwest, the National Communication Council (NCC) of Peter Essoka had issued an order calling on all media houses to desist from reporting or holding talk shows on the Anglophone crisis, threatening them with suspension.

Above all these, the Groupement Special Du Operations, GSO and other units of the police still roam the town of Bamenda, hands on triggers with sniper rifles looking menacingly at people lined along the roads, while major junctions and streets are still manned by several detachments of the police and gendarmes. Bamenda is still a militarized zone.

Yet government has remained completely silent in front of the Anglophone crisis. What La Republique is doing is trying to fragment the public in its erroneous believe that the crisis is been engineered by some individuals.  Recent reports in Bamenda say the government has been meeting with village meeting groups mostly from the West region to bribe them with huge sums of money not to lock their shops and for taxi drivers and “benskin” riders amongst them to work during the ghost towns called for every Mondays and Tuesdays still government listen to the people of West Cameroon. In Buea, the Mayor is said to have added additional locks to shed locked up during the ghost town and has also reportedly bought taxis that he intends to use during the ghost town to defeat it purpose.

<https://bamendaonline.net/yaounde-results-to-intimidation-of-anglophones-as-solution-to-crisis/>

1. **Gov’t Shuts Down Bamenda Independant Radio in the Face of an Anglophone Crisis**

*Added by*[**Bamenda Online**](https://bamendaonline.net/author/bamendaonline/)*on January 11, 2017.
Saved under*[**Law & Human Rights**](https://bamendaonline.net/category/society/law-human-rights/)*,*[**News**](https://bamendaonline.net/category/news/) *Tags:*[**ambazonia**](https://bamendaonline.net/tag/ambazonia/)*,*[**censorship**](https://bamendaonline.net/tag/censorship/)*,*[**Itoe Peter Mbongo**](https://bamendaonline.net/tag/itoe-peter-mbongo/)*,*[**Radio Hot Cocoa**](https://bamendaonline.net/tag/radio-hot-cocoa/)*,*[**Songa Pierre Rene**](https://bamendaonline.net/tag/songa-pierre-rene/)

One of Bamenda’s leading independant radio stations, Radio Hot Cocoa has been temporarily shut down by the administration of Mezam. This follows a regional order N0 001/AR/SDG/SG/DAAJ of 10th January 2017, signed by the prefect of Mezam, Songa Pierre Rene.

Hot Cocoa was sealed about the hours of 4 and 4:30 pm on Tuesday January 10th 2017 as the program “Tory Time” a popular pidgin news magazine presented by Mac Chi was on air. The order presumably from the Governor of the Northwest was executed by the SDO accompanied by Itoe Peter Mbongo, DO for Bamenda II in the presence of security officials.

According to authorities of Radio Hot Cocoa, the radio was taken off air because it had defiled professional norms and not because it gave a voice to the striking teachers and lawyers as it was purported in some quarters. Rumours had also spread that the presenter, Mac Chi had been arrested but this was found not to be true and he is safe and free.

The Manager of Radio Hot Cocoa Gideon Taka responding to the temporary closure of the radio on a popular Whatsapps group for journalists in Bamenda (MPB) opined that “I affirm here that the Governor acted in his right to bring order where it is right to be” he goes further to plead with media men and women not to make an issue out of it.

” I am happy this house is mature and has handled the matter with professional tact … Here I plead we minimize any exchanges on this matter so as not to manure any degeneration.  I count on your understanding and necessary assistance when and where it is deemed feasible”  the statement added.

Meanwhile the exact reasons for closing the radio have not been officially stated. This is the second time the administration of Mezam is shutting down a radio station. On April 22, 2013, the then SDO of Mezam Felix Nguele Nguele  on the instruction of the minister of Communication ordered the closure of Foundation Radio Bamenda on grounds of broadcasting an interview with the SCNC secessionist  movement. The radio was subsequently reopened after a lengthy struggle and pressure from the International Committee to Protect Journalists (ICJ) New York.

By Pedmia Shatu in Bamenda

<https://bamendaonline.net/govt-shuts-down-bamenda-independant-radio-in-the-face-of-an-anglophone-crisis/>

1. **Anglophone Crisis: SDF Weighs In, Invites AU, Calls on Biya to Act Fast**

*Added by*[**Bamenda Online**](https://bamendaonline.net/author/bamendaonline/)*on January 30, 2017.
Saved under*[**National**](https://bamendaonline.net/category/national-2/)*,*[**News**](https://bamendaonline.net/category/news/) *Tags:*[**anglohones**](https://bamendaonline.net/tag/anglohones/)*,*[**Anglophone crisis**](https://bamendaonline.net/tag/anglophone-crisis/)*,*[**Cameroon Anglohone Consortium**](https://bamendaonline.net/tag/cameroon-anglohone-consortium/)*,*[**ni john fru ndi**](https://bamendaonline.net/tag/ni-john-fru-ndi/)*,*[**Paul Biya**](https://bamendaonline.net/tag/paul-biya/)*,*[**SDF**](https://bamendaonline.net/tag/sdf/)

 Meeting in Bamenda this weekend, the National Executive Council (NEC) of the Social Democratic Front  (SDF) sent a strong signal to the Yaoundé authorities in a resolution issued at the end of the conclave. The SDF officially invited the Council of Peace and Security of the United Nations to intervene in crisis. The party of Ni John Fru Ndi also declared fraudulent the 1972 Referendum and calls for a Constitutional conference in Cameroon amongst others.

 The NEC resolution condemns the abduction, kidnapping and arrest of unarmed innocent civilians and their transfer  to Yaoundé, the manipulation of traditional rulers, the suppression of internet lines, the manipulation of public opinion and calls on Mr. Biya to release those arrested amongst many other demands and  to act quickly or the SDF will take its responsibilities.

Below is the complete resolution by NEC

<https://bamendaonline.net/anglophone-crisis-sdf-weighs-in-invites-au-calls-on-biya-to-act-fast/>

1. **Anglophone Crisis: PCC Moderator Calls For Dialogue**

*Added by*[**Bamenda Online**](https://bamendaonline.net/author/bamendaonline/)*on January 30, 2017.
Saved under*[**National**](https://bamendaonline.net/category/national-2/)*,*[**News**](https://bamendaonline.net/category/news/) *Tags:*[**Anglophone crisis**](https://bamendaonline.net/tag/anglophone-crisis/)*,*[**anglophones**](https://bamendaonline.net/tag/anglophones/)*,*[**arrest**](https://bamendaonline.net/tag/arrest/)*,*[**detention**](https://bamendaonline.net/tag/detention/)*,*[**pcc**](https://bamendaonline.net/tag/pcc/)*,*[**rev. Fonki**](https://bamendaonline.net/tag/rev-fonki/)

In a Press Conference in Bamenda yesterday, the chief Priest of the PCC, the Rt. Rev. Fonki Samuel called for dialogue with the striking teachers and lawyers towards a peaceful resolution of the Anglophone crisis that has plague activities in both the Northwest and the South West regions of Cameroon.

Reading out what appears to be the resolutions of the Executive Committee Meeting of the PCC that held in Buea on January 27, 2017, Rev. Fonki said the PCC “lends it voice to all the efforts of well meaning Cameroonians to bring a fruitful closure to the situation that is plaguing our beloved nation in the North and South West regions”

He went further to propose that “amnesty be granted to all those who are detained because of their political ideologies, and those detained because of crimes within this period, should be detained and tried in regions where they were arrested so that their rights to be cared for by family members and friends would be guaranteed”

The release went a step further to plead for further arrest by security forces to be discontinued and for Christians of the PCC to go down on their knees to pray for the nation.

Responding to questions from the press, the PCC Moderator made it clear that though he is proprietor of PCC schools, he did not call for the strike action and does not have the right to call it off. He however called for meaningful dialogue to redress the situation.

He said the government should show good faith by implementing the resolutions that were accepted by teachers at the the ad-hoc committee in Bamenda. He added that the heavy presence of troops in and around schools is not helping the situation at all.

The press conference came at a time the SDF was meeting in conclave at the Ntarikon Residence of Ni John Fru Ndi where they issued a similar call.

The PCC Buea declaration was signed by Rev. Fonki Smauel, Rev. Babila George Fochang, Ngole Ndive Mbuayo, Rev. Bessong Johnson Tabe, Rev. Jum Ignatius, Rev. Dr. Julius Ngwa Ambe, Rev. Nganji Christain Ndi, Rev. Ndiaka Timothy, Rev. Ajime Nelson, Dr. Assam George and Viban Gladys.

By Abongwa Fozo

<https://bamendaonline.net/anglophone-crisis-pcc-moderator-calls-for-dialogue/>

1. **Anglophone Crisis: GBHS Nitop’s Admin. Block Set Ablaze**

*Added by*[**Bamenda Online**](https://bamendaonline.net/author/bamendaonline/)*on February 6, 2017.
Saved under*[**Education**](https://bamendaonline.net/category/society/education/)*,*[**News**](https://bamendaonline.net/category/news/) *Tags:*[**anglophone Cameroon**](https://bamendaonline.net/tag/anglophone-cameroon/)*,*[**Anglophone crisis**](https://bamendaonline.net/tag/anglophone-crisis/)*,*[**anglophone education**](https://bamendaonline.net/tag/anglophone-education/)*,*[**fire**](https://bamendaonline.net/tag/fire/)*,*[**GBHS Nitop**](https://bamendaonline.net/tag/gbhs-nitop/)*,*[**teachers' strike**](https://bamendaonline.net/tag/teachers-strike/)

Unidentified individuals have successfully set ablaze the administrative block of Government Bilingual High School Nitop, completely destroying everything in the principal’s office on the night of Sunday February 5, at about 10 pm, at the height of the Cameroon Vs Egypt encounter.

The prompt intervention of the Bamenda Army Rescue Unit prevented the fire from extending into the other officers in the block. Two modern photocopiers, printers, computers and other important office document and the entire cabinet of the office were razed down by the flames. An official of the school said they were informed by a neigbour about the fire, a few minutes after it was set ablaze, but could not prevent it beacuse the principal's office was locked. They had to call the Army Rescue Unit to intervene.

Bamenda Online was informed that this act was carried to serve as a warning to Francophone students of the school who had been attending classes during this period and were planning to resume school in full today after the announcement on CRTV that the strike by Anglophone teachers has been called off.

By the time this reporter reached the scene, many students of the francophone section, all dressed in assorted clothing could be seen loitering around the campus, all visible shocked by the act. I could hear one expressed in French “Bamenda est devenu bizarre, moi je ne suis plus la” literally translated as “Bamenda is becoming unbearable, I’m no longer part of this”

At the same time, some military men in uniform, mostly police and gendarmes could be seen picking up their children from GBHS Nitop. Many residents believe that some francophone have either been paid or are deliberately out to sabotage the teachers’ strike.

Meanwhile unconfirmed reports say the school bus of GHBS Atiela and the private car of the Principal of GBHS Up Station have been burn to ashes by unidentified individuals. Word around town is that they are those doing everything to have classes resume in their schools. Others have been quick to point out that these are administrators whose hands are virtually tied and there is nothing they can do about it.

And as usual since the civil disobedience started, no school effectively resumed in Bamenda today, as another episode of ghost town was in full swing despite all the announcements and calls over CRTV that the crisis has been effectively put to rest with a call-off of the strike by the representatives of some of the teachers’ trade union.

<https://bamendaonline.net/anglophone-crisis-gbhs-nitops-admin-block-set-ablaze/>

1. **Anglophone Crisis: B’da Court of First Instance Postpone Case Against Bishops**

*Added by*[**Bamenda Online**](https://bamendaonline.net/author/bamendaonline/)*on April 21, 2017.
Saved under*[**News**](https://bamendaonline.net/category/news/)*,*[**Northwest**](https://bamendaonline.net/category/northwest/) *Tags:*[**Abongwa Fozo**](https://bamendaonline.net/tag/abongwa-fozo/)*,*[**anglophone Cameroon**](https://bamendaonline.net/tag/anglophone-cameroon/)*,*[**Anglophone crisis**](https://bamendaonline.net/tag/anglophone-crisis/)*,*[**Arch Bishop Cornelius Fontem**](https://bamendaonline.net/tag/arch-bishop-cornelius-fontem/)*,*[**Bamenda**](https://bamendaonline.net/tag/bamenda/)*,*[**Bamenda Arch Diocese**](https://bamendaonline.net/tag/bamenda-arch-diocese/)*,*[**Bamenda Court of First Instance**](https://bamendaonline.net/tag/bamenda-court-of-first-instance/)*,*[**Bishop George Nkuo**](https://bamendaonline.net/tag/bishop-george-nkuo/)*,*[**Bishop Micheal Bibi**](https://bamendaonline.net/tag/bishop-micheal-bibi/)

The Arch Bishop of the Bamenda Arch Diocese, His Grace Cornelius Fontem Esua, the Auxiliary Bishop of Bamenda  Mgr. Micheal Bibi, the Bishop of Kumbo, Mgr.George Nkuo the Principals of Our Lady of Lourdes and Sacred Heart Mankon, and the principal of Saint Bedes College Ashing Kom were due to appear before the Court of First Instance Bamenda on Friday May 21, 2017 to answer charges on seven counts brought against them by a group of parents under the canopy of the Consortium of Parents whose children attend various mission institutions.

The Bishops and Principals were charged amongst others for failing to ask parents to send their children back to school or cause the deposit of school fees paid into an escrow account despite a notice served them,  for signing a joint communiqué on February 9th 2017 in concertation with others to the effect that the non-resumption of schools is as a result of an unresolved political problem, for having cause the non-payment of salaries of teachers in mission schools for some months now, thus depriving the state of the necessary tax deductions, for refusing to teach, feed and accommodate students after collecting fees, refuse to refund school fees collected, spread false information liable to injure public authorities and is claiming the sum of 150 billion as special and general damages .

Both parties were to appear in court on Friday April 21, at the Bamenda Court of First Instance Up Station, but in a swift turn of events, the Court of First Instance on Wednesday April 19 suspended the hearing to the 5th of June 2017, on the ground that the judicial family was to participate in the removal of the corpse of Magistrate Kilbat Noel from the Bamenda regional hospital mortuary on that same day.

The Bishops responded promptly, with the Arch Bishop announcing in Church on Wednesday April 21 during a priestly ordination ceremony that “justice delayed is justice denied” and expressed his wish to have his day in court as we hear here saying once summoned to court, there are only two out comes, either you are acquitted or convicted.

Before the Bishop’s pronouncement in Church, the Archdiocesan Parent Teachers’ Association ADPTA issued a press release on Tuesday April 18 stating that “ ADPTA is a well structured association with representation from nursery through secondary to high school. Hence, the said individuals to the best of our knowledge are not members of any of our schools’ PTA and as such cannot talk on behalf of the PTA at any level. More ever in our structures there is nothing like a consortium of Parents”

Meanwhile retired Col. Tamambang Simon Che has issued a disclaimer contained in a radio announcement to some media houses in Bamenda starting that “ I retired col. Tamambang Simon Nche of Mankon wish to state publicly and categorically that I am not connected in any way to the so-called consortium of parents” he goes further to state that “ I have NEVER contacted any lawyer or Bailiff to bring court action against the above mentioned servants of God”

His lawyer, Barrister Khan Muluh Jude of Muluh & Partners Law Firm Douala have also issued a statement distancing Ret. Col. Tamambang from the law suit and has warned any media organ or individual propagating such information that they are doing so at their own peril.

This move to push backward the hearing averted a massive turnout that was anticipated at the court yard to accompany the men of God to answer these charges. The question many people in Bamenda are yet to find a satisfactory answer to is who is actually behind this summon as the Ret. Col. Tamambang has completely distant himself from its. For the co-respondent, Lt. Col. Terence Sama, he is yet to offer any statement as to the part he has in all these.

Meanwhile, the Bishops of Buea, Mamfe, and Kumba, and the Moderator of the PCC are also due to appear at the Buea Court of First Instance on Monday April 24 in a similar suit brought against them. Thousands of Christians Bamenda Online gathered have been mobilizing to accompany them to the court session.

By Abongwa Fozo

<https://bamendaonline.net/anglophone-crisis-bda-court-of-first-instance-postpone-case-against-bishops/>

1. **2017  U- Games Kicks Off Under Shadow of The Anglophone Crisis**

*Added by*[**Bamenda Online**](https://bamendaonline.net/author/bamendaonline/)*on April 23, 2017.
Saved under*[**National**](https://bamendaonline.net/category/national-2/)*,*[**News**](https://bamendaonline.net/category/news/)*,*[**Sports**](https://bamendaonline.net/category/sports/) *Tags:*[**2017 University Games**](https://bamendaonline.net/tag/2017-university-games/)*,*[**Anglophone crisis**](https://bamendaonline.net/tag/anglophone-crisis/)*,*[**INJS**](https://bamendaonline.net/tag/injs/)*,*[**MINSUP**](https://bamendaonline.net/tag/minsup/)*,*[**Public Works School**](https://bamendaonline.net/tag/public-works-school/)*,*[**UBa**](https://bamendaonline.net/tag/uba/)*,*[**University of Bamenda**](https://bamendaonline.net/tag/university-of-bamenda/)*,*[**University of Buea**](https://bamendaonline.net/tag/university-of-buea/)*,*[**University of Douala**](https://bamendaonline.net/tag/university-of-douala/)*,*[**University of Dschang**](https://bamendaonline.net/tag/university-of-dschang/)*,*[**University of Maroua**](https://bamendaonline.net/tag/university-of-maroua/)*,*[**University of Ngaoundere**](https://bamendaonline.net/tag/university-of-ngaoundere/)*,*[**University of Yaounde I**](https://bamendaonline.net/tag/university-of-yaounde-i/)*,*[**University of Yaounde II**](https://bamendaonline.net/tag/university-of-yaounde-ii/)

The 20th edition of the University Games of Cameroon and the first ever to be hosted in the Northwest Region officially kicked off this afternoon at the campus of the University of Bamenda, with some 3000 athletes from eight state universities, three public higher institutes of learning and seven private universities and higher institute of learning participating.

The prevailing socio-political crisis in the Northwest and South West regions had a significant impact on the games, with the Catholic University Institute of Buea (CUIB) pulling out before the start of the games, forcing the organizers to switch the opening football match that was supposed to pit the University of Bamenda (UBa) against the CUIB to a rather uninteresting feminine football match between the host and the Ngaoundere University.

The games also noted the absence of regular participants like the National Polytechnic Bamenda, the St Monica University of Buea, The Catholic University of Cameroon-Bamenda and The Christian University of Cameroon (CUC), taking away some of the effervescence that always goes along with the games. The locals also largely failed to embrace the games depriving it of the huge turnout that has been a constant feature in all the previous 19 editions.

This however did not dampen the enthusiasm and determination of the participating delegations and the host university to engrave the game into the annals of history. In her welcome speech, the Vice Chancellor of UBa, Prof. Theresa Nkuo said it was not by chance that UBa was chosen to host the games and it wasn’t by mistake that they decided to host it. She heaped on the infrastructural benefits UBa has reaped from taking up the challenge to stage the event.

Higher Education Minister Jacques Fame Ndongo described the university games not only as a sporting event to exhibit talent but also as a forum to display and forge national unity and integration, peace, love and unity and the cultural diversity of Cameroon above all else. He called for the Olympic spirit of fair play to triumph above all difference and aspirations.

The Mayor of Tubah, Tajong Martin used his welcome speech to praise the efforts of government and the University of Bamenda for the enormous changes brought to his municipality by the game. He however did not minced word when he urged government to seek a solution to the ongoing crisis in this part of the country and for the engineers involve in the ongoing construction works in the games village to respect the municipal town plan.

The opening ceremony of the games was also attended by the Minister of Sports and Physical Education Ishmael Bidoung Mkpatt , Mbah Acham of Supreme State Audit, Atanga Nji Paul Minister Delegate at the Presidency in-Charge of Special Duties, the Governor of the Northwest Region and various administrative and tradition authorities.

In the opening match, the ladies of UBa beat their mates of Ngaundere by 2-0. Earlier in the day, a cross country marathon and a unity walk took place in Bamenda, kicking off from the Commercial Avenue to start the game. The Universities of Douala, Buea, Bamenda, Dschang, Ngaoundere, Maroua, Yaoundé I and II, the National Institute of Youth and Sports, The Public Works School, National Institute for Post and Telecommunication, Institut Universitaire Catholique Sainte Jerome Douala, Institut Siantou Superieur, Universtaire Du Montagne, Institut Universitaire de la Cote, Institut Universtaire du Golfe de Guinee.

<https://bamendaonline.net/2017-u-games-kicks-off-under-shadow-of-the-anglophone-crisis/>

1. **Anglophone Crisis: Pentecostal Churches Declared Support For Catholics, Pres and Baptist leaders**

*Added by*[**Bamenda Online**](https://bamendaonline.net/author/bamendaonline/)*on April 26, 2017.
Saved under*[**News**](https://bamendaonline.net/category/news/)*,*[**Religion**](https://bamendaonline.net/category/society/religion/) *Tags:*[**anglophone Cameroon**](https://bamendaonline.net/tag/anglophone-cameroon/)*,*[**Anglophone crisis**](https://bamendaonline.net/tag/anglophone-crisis/)*,*[**Apostolic Bishop Congress**](https://bamendaonline.net/tag/apostolic-bishop-congress/)*,*[**Arch Bishop Cornelius Fontem**](https://bamendaonline.net/tag/arch-bishop-cornelius-fontem/)*,*[**Arch Bishop Godfred Anyere**](https://bamendaonline.net/tag/arch-bishop-godfred-anyere/)*,*[**Bamenda**](https://bamendaonline.net/tag/bamenda/)*,*[**Bamenda Arch Diocese**](https://bamendaonline.net/tag/bamenda-arch-diocese/)*,*[**Bamenda Court of First Instance**](https://bamendaonline.net/tag/bamenda-court-of-first-instance/)*,*[**Bishop Chama Meyembi**](https://bamendaonline.net/tag/bishop-chama-meyembi/)*,*[**Bishop George Nkuo**](https://bamendaonline.net/tag/bishop-george-nkuo/)*,*[**Bishop Micheal Bibi**](https://bamendaonline.net/tag/bishop-micheal-bibi/)*,*[**Dr. Abraham Dakuanja**](https://bamendaonline.net/tag/dr-abraham-dakuanja/)

The way things are unfolding, it would appear there is no end in sight for the Anglophone Crisis. Each passing day bring up a new twist to the unfolding story. Recently it was a call by the Apostolic Bishop Congress (ABC) for all Pentecostal Christians together with Apostolic/Pentecostal Bishops, Pastors and leaders to “stand up in one voice and prayer behind the ministers of [God summoned](https://bamendaonline.net/blog/anglophone-crisis-bda-court-of-first-instance-postpone-case-against-bishops/)”

The call signed by Bishop Chama Meyembi, Arch Bishop Godfred Anyere and Dr. Abraham Dakuanja  following a meeting they held to that effect on Friday April 21, 2017 strongly condemn the actions of those dragging God’s servants to court.  They expressed their “grief and annoyance” towards these individuals whom they accused of “instead providing solution to the present upheaval in Cameroon, think they can drag the church and God in the mud by taking the Church to court” describing it as the worst ever  throughout this  crisis.

They even go further to state that “the reprobate conception of taking the Church to court is a demonic attack on the church” and reminded all Pentecostal Christians that the church of Christ is one and if their brethren of Catholic, Presbyterian and Baptist have been dragged to court it means the entire Pentecostal body is included. The release ends with a call for all to keep on praying until something happens.

This letter was released on the Same day the Bishops where due to [appear at the court of First Instance in Bamenda](https://bamendaonline.net/blog/anglophone-crisis-bda-court-of-first-instance-postpone-case-against-bishops/). The Arch Bishop of the Bamenda Arch Diocese, His Grace Cornelius Fontem Esua, the Auxiliary Bishop of Bamenda  Mgr. Micheal Bibi and the Bishop of Kumbo, Mgr.George Nkuo were due to appear before the Court of First Instance Bamenda on Friday May 21, 2017 to answer charges on seven counts brought against them by a group of parents under the canopy of the Consortium of Parents whose children attend various mission institutions.

[The Bishops and Principals](https://bamendaonline.net/blog/anglophone-crisis-bda-court-of-first-instance-postpone-case-against-bishops/)were charged amongst others for failing to ask parents to send their children back to school or cause the deposit of school fees paid into an escrow account despite a notice served them,  for signing a joint communiqué on February 9th 2017 in concertation with others to the effect that the non-resumption of schools is as a result of an unresolved political problem, for having cause the non-payment of salaries of teachers in mission schools for some months now, thus depriving the state of the necessary tax deductions, for refusing to teach, feed and accommodate students after collecting fees, refuse to refund school fees collected, spread false information liable to injure public authorities and is claiming the sum of 150 billion as special and general damages. The case was postponed to the 5th of June 2017.

<https://bamendaonline.net/anglophone-crisis-pentecostal-churches-declared-support-for-catholics-pres-and-baptist-leaders/>

1. **Biya Employs Divide and Rule as Solution to Anglophone Crisis**

*Added by*[**Bamenda Online**](https://bamendaonline.net/author/bamendaonline/)*on May 4, 2017.
Saved under*[**opinion**](https://bamendaonline.net/category/opinion/opinion-opinion/) *Tags:*[**apointment**](https://bamendaonline.net/tag/apointment/)*,*[**Chief Tabetando**](https://bamendaonline.net/tag/chief-tabetando/)*,*[**Elecam**](https://bamendaonline.net/tag/elecam/)*,*[**Enow Ahraham Egbe**](https://bamendaonline.net/tag/enow-ahraham-egbe/)*,*[**Fokam Azu'u**](https://bamendaonline.net/tag/fokam-azuu/)*,*[**Ndi Tsembom**](https://bamendaonline.net/tag/ndi-tsembom/)*,*[**opinion**](https://bamendaonline.net/tag/opinion-2/)*,*[**Paul Biya**](https://bamendaonline.net/tag/paul-biya/)*,*[**Peter Mafany Musonge**](https://bamendaonline.net/tag/peter-mafany-musonge/)

The North West Region appears to be paying the “scapegoat price” as the current Anglophone stalemate in the country persists, losing some key positions in government following recent appointments by the Head of State. In a typical “divide and rule” solution to the crisis, the government of Paul Biya has resorted to appointing more Anglophones from the Southwest as opposed to the Northwest probably as a means to create discord in the ranks of the disgruntled Anglophone community.

The President appointed the former Prime Minister and Senator, Peter Mafany Musonge who hails from the South West Region to head the recently created National Commission For the Promotion of Bilingualism and Multiculturalism (NCPBM). Before his appointment, Senator Mafany held the position of CPDM Senatorial group leader. He is also Grand Chancellor of National Orders.  After his appointment, Mr. Biya handed over his position as CPDM Group Leader in the Senate to a fellow south westerner, Senator Chief Nfor Tabetando.
[truncated: 173,678 more chars]
