# Supplementary material
Source: Research Square preprint supplement (doi:10.21203/rs.3.rs-8545290/v1)
Supplement: Supplementary file 9 [file d56123cbf5b2969cd171ffbd.docx]

1. **Death Penalty Hands Over Limbe Journalist**

[January 5, 2017](https://thesunnewspaper.cm/death-penalty-hands-limbe-journalist/)

[Steve](https://thesunnewspaper.cm/author/angustephen/)

**BY ATIA AZOHNWI**

Eden Newspaper’s Limbe City Reporter, Quindia Eshu Thadius is currently in gendarmerie custody after his arrest by armed police officers last December 19, 2016.

Security officials claim that the Limbe-based journalist has been fanning the flames to the crisis that has since enveloped Cameroon’s North West and South West Regions.

Quindia was whisked off into a police van on his way to Limbe from Douala where he had gone to print newspapers. He is said to have been very passionate in reporting about the marginalisation of Anglophones in a French dominated Cameroon. He is also accused of taking a tough stance against government during radio debates.

The policemen at the Missellele security checkpoint quickly identified him and ferried him to the Limbe Gendarmerie Post where he has since been held incommunicado. A gendarmerie source hinted that the torture meted out on the journalist is in a bid to deter others from supporting the activities of the Southern Cameroons National Council (SCNC) and other separatist groups.

Pressure from local journalism groupings and human rights lawyers led to the transfer of Quindia to Yaoundé. He is said to have been aided by an Anglophone officer to escape while on transit.

If caught, Quindia will have to face the death penalty in accordance with the December 2014 law on the suppression of acts of terrorism. Quindia’s whereabouts remains in doubt as security officers widen their dragnet to catch him.

He is among the many journalists who had been threatened by local administrative and security officials through anonymous calls and texts.

Common Law Lawyers have been on strike to protest government’s attempts to annihilate the Common Law practice in a constitutionally bilingual and bi-jural Cameroon. The strike has been on Since October 11.

Anglophone teachers in the country joined the strike last November 21 to uphold Anglo-Saxon values under threat in Cameroon’s two English-speaking regions.

Matters came to a head on Thursday, December 8 when the population of Bamenda took to the streets to denounce the politicisation of a strike action they consider genuine and borne of longstanding grievances.

Days of ghost town have since been observed throughout the South West and North West Regions of the country.

<https://thesunnewspaper.cm/death-penalty-hands-limbe-journalist/>

1. **Buea DO consults media, education stakeholders on schools resumption**

[April 25, 2017](https://thesunnewspaper.cm/buea-consults-media-education-stakeholders-schools-resumption/)

By Ikome Christie-Noella Eposi
The Divisional officer of Buea sub-division Kouam Wokam Paul in a joint meeting with members of the media and other education stakeholders has called on the effective resumption of schools in his division of command.
During the meeting aimed at brainstorming on ways to ensure the effective resumption of schools, the DO regretted that despite the declaration by the all Anglophone Teachers Trade Unions, calling off their strike, classes are yet to resume effectively.
“The future of our children is being overshadowed by irrelevant forces. Education remains the right to every child and this should not be jeopardized for whatsoever reason. The children need to be educated. It is their future which matters most’’. D.O Wokam Paul noted.
As a result, the divisional officer opened the floor for solutions to be brought forward as regard to the ongoing crisis. Major concerns were brought up from the media as well as the education sector, some of which were the then absence of internet connection as a means of communication. Security, the already existing mindset of the parents and children which will be extremely difficult to change especially for those in urban areas, the detention of some media men which has shown that there is no freedom of press, amongst others.

Possible Solutions

“When there is a will, there is a way’’ The divisional officer suggested. He assured all present that their security will be ensured and that the mindset of parents and children could be changed only if they are being educated on the importance of education.
“In all, let us look at the educational aspect and not the political. Let us focus on the educational side. Our children need to go to school’’. He reiterated. Television and radio stations took upon themselves as a responsibility to broadcast programs pertaining to the issue and encouraging the effective resumption of schools. A delegation was assigned to urban areas to re-educate parents and children making them understand the importance of education. Those in authority were equally told to set the pace for others to follow suit by sending their own children to school.
The over two hours closed door meeting ended with the parties involved verbally agreeing to ensure that classes resume effectively in the region.

<https://thesunnewspaper.cm/buea-consults-media-education-stakeholders-schools-resumption/>

1. **Archbishop Kleda meets stonewall in NW,SW**

[May 8, 2017](https://thesunnewspaper.cm/archbishop-kleda-meets-stonewall-nwsw/)

By Elah Geoffrey with reports
The president of the National Episcopal Conference of Cameroon, His Grace Archbishop Samuel embarked on a fire-fighting mission to the South West and North West regions to ensure the effective resumption of schools ended in a failure by all accounts.
His team which comprised of Mgr. Abraham Kome, Bishop of Bafang and head of the sub-commission for Justice and Peace, and Fr. Jervis Kebbei, Vice secretary general of the National Episcopal Conference, met with strong resistance from both the parents and even some clergy.

Archbishop Kleda returns empty handed from NW, SW

The mission proved to be too herculean even for the men of God. In Buea, Archbishop Kleda convened a meeting with all school administrators in the diocese and attempted to persuade them alongside the Bishop of Buea to call on parents to send their children back to school. The meeting was also attended by the Governor of the South West region, Bernard Okalia Bilai who was accompanied by heads of services like the police, gendarmes, procureur general, the mayor of Buea, GCE Board registrar and three of the people who have dragged the Buea church leaders to court.
During the meeting, Archbishop Samuel Kleda called on all to have the good of the nation at heart, work towards the restoration of true harmony by being makers of peace and not just lovers of peace. He appealed for an open and sincere dialogue and the cessation of violence at all levels of society, he also called on the government to play its own part towards the immediate restoration of peace all over the national territory. He further appealed to all parents to send their children to school immediately.
However, reports have it that some of the people in the meeting insisted schools could resume only if all Anglophones arrested within the framework of the ongoing protest are released. Most of the people in the meeting called on the government to pursue frank dialogue as the way to finding lasting solutions to the crisis in the Anglophone regions.
The Archbishop and team then left for Kumba where they convened a similar meeting that proved not to be too civil as most of the attendees objected and frowned at the team’s preliminary use of French language, arguing that it only goes to acerbate the issues raised and which have brought the country to this point already – marginalization of the Anglophones.
According to Fr Herbert Niba, who published a synopsis of a similar meeting in Mamfe, “The meeting was generally very cordial. After a welcome note by host bishop Nkea, Mgr Kleda made an English introductory remark, before continuing in French. He spoke in bits, translated aptly by Fr Jervis. There was full comprehension by the very mixed audience.”
Mgr Kleda called for continuous prayer to enlighten all, he admitted to have met Anglophone strike leaders in January 2017 during the NEC meeting in Mamfe. He insisted that dialogue is always possible and asked for an end to hatred, suspicion civil disobedience, as well as intimidation and arbitrary arrests. Mgr Kleda furthered taht true peace, which is fullness of life, is built on solidarity, and fraternity and affirmed that NEC has asked the state to respect the rights of all Cameroonians, and apply their very own 1996 constitution on decentralization.
Mgr Kleda said that the summons of Anglophone bishops is a creation of new problems not solution to older ones. He called on parents to help the Church foster its mission of education by taking children to school. “Whereas all problems are important, schooling is urgent, because time waits for no one.” the Archbishop added.
Fr Herbert Niba continued in his narrative of the meeting’s proceedings “ the reactions were uniform and straightforward. Whereas Mgr Kleda gave opening for three persons to give proposals to a committee he expected to be formed by the Education Secretary to see to the take off of schools immediately, all three speakers (teachers and parents themselves) reiterated the stance, that: (i)until all issues raised are solved, (ii) for fear of what ghosts may do to school children (iii) for the treasure which is our educational heritage since colonial days (iv) because life is better than education, WE (Parents) SHALL NOT SEND OUR CHILDREN TO SCHOOL!”
Fr. Herbert continued that “not even the appeal of the Mayor of Mamfe bore any fruit, nor the suggestion of the SDO, that they should look for local solutions for Manyu, and not to try to tackle national issues. Mgr Nkea, Bishop of Mamfe who had been silent throughout, repeated the position of BAPEC bishops, now known verbatim to all Catholic faithful: “Our schools have never been closed. He then asked principals & teachers to keep going to school as they’ve been doing, and told the Mayor to lead his daughter to QRC Okoyong, who will be taught diligently, even if she were the only student!
The Episcopal team then continued their perilous mission to Bamenda in the Northwest were they met the same resistance. They however failed to visit the Kumbo diocese a decision which raised many eyebrows as to why a prominent diocese like Kumbo was left out in the plan.
It should be recalled that Bishops of the Bamenda Ecclesiastical Province (BAPEC) had issued a memo to President Biya at the beginning of the protests last year. The Memo justified the reasons for regional outcry and proposed a way forward. Today, they have been dragged to court alongside other clergy from the Baptists and Presbyterian churches for allegedly supporting protesters. Many see this summons by a group that calls itself the Consortium of Parents government persecuting the Church and its leaders by proxy, using senior members of the military who by military discipline will not form or be members of activist civil society associations.
It is not yet clear whether Parents will send their children to school as recommended by Samuel Kleda.

<https://thesunnewspaper.cm/archbishop-kleda-meets-stonewall-nwsw/>

1. **Manyu socio-political forum calls for urgent schools resumption, warns against ghost towns**

[May 8, 2017](https://thesunnewspaper.cm/manyu-socio-political-forum-calls-urgent-schools-resumption-warns-ghost-towns/)

By Wambo Emmanuel in Mamfe
In view of the current political deadlock rocking the two Anglophones regions of Cameroon, the sons and daughters of Manyu division of the South West region have taken a firm stance to call off the phenomenon of calls of ghost towns and boycott of schools. This was during a three days consultative meeting that held in Mamfe under the banner of “all Manyu socio-political forum” chaired by the minister of special duty at the presidency Victor Mengot in close collaboration with senator chief Nfor Tabetando amongst others. Though the three days meeting of the all Manyu socio political forum that started on Friday, April 28 and rounded on Sunday, April 30, 2017 according to the organizers was reported to be apolitical, many felt that it was a CPDM weapon to fight the ghost.

In a heated debate with the youth of the division who resisted their stands to honour calls of ghost towns and schools boycott for reasons they gave as marginalization of the Anglophones by the regime in place took minister Victor Mengot, senator Nfor Tabetando and a host of professors to convince the disgruntled youths by citing the steps government is taking to resolve the crisis. Though the youths maintained that they were being deceived by their political elite for their selfish interests, the flames of the continuation of ghost towns and school boycott was only quenched by Minister Victor Mengot and the professors when they enumerated what the state has done to alleviate the division. This includes the appointment of the sons and daughters of Manyu into higher positions of government, the Kumba-Mamfe, Bamenda-Ekok roads among others.
In his opening message to the sons and daughters of the division to keep them aware of the harm the ghost towns and boycott of schools plays negatively to the division, Mengot Victor said the Manyu man has always been noted as academicians who are today in high ministerial post. Their only power is education because they are neither good in business or agriculture and so, they should desist from the school boycott because they are killing the generation of tomorrow. He nevertheless described the ongoing crisis in the two Anglophones regions as a parasite affecting the people of Manyu negatively. He cautioned them to be informed not to be deformed. They should cultivate the habits of reading newspapers, listening to news and seeing television because those deceiving them are distorting facts.

<https://thesunnewspaper.cm/manyu-socio-political-forum-calls-urgent-schools-resumption-warns-ghost-towns/>

1. **Don’t force exams on a troubled people, MP tells minister**

[May 15, 2017](https://thesunnewspaper.cm/dont-force-exams-troubled-people-mp-tells-minister/)

By Mokum Thomas and Wambo Emmanuel in Bamenda
The Member of Parliament for Bamenda/Bali constituency, Hon. Forbi Nchinda Simon cautioned the government not to force the General Certificate of Examination, GCE on students in the Northwest and Southwest regions who have not been to school since December 9, 2017.
He made the remark during a meeting chaired by the minister of Basic Education Jean Ernest Ngale Bibihe and attended by the registrar of the GCE Board, Humphrey Ekema Monono including other education stakeholders.

The meeting in Bamenda comes on the heels of a similar meeting that took place in Buea aimed at ensuring that the GCE exams take place in the English speaking regions which have been witnessing some crisis for months now.
During the meeting it was noticed that the Northwest region has registered fifty thousand students less than what obtained last year. It was because of this statistics and other issues raised that Hon. Forbi said the statistic are to poor for the exam to hold in the Northwest region “Forcing examination on students will cause a serious problem”, the Hon.Forbi said, “the quality of the education that was delivered during the academic year 2016/2017 where there has been no teaching, Mr minister if you insist on holding the exams, then you will kill the Anglophone system of education because students will come out with certificates that will not be recognised in the world” he added.
Monono splits with basic education minister
On the second day of his three-day working visit to Bamenda, the Northwest regional capital, the minister of Secondary Education, Ngale Bibihe announced that students who have not registered for the 2017 session of the end of year examination can write but the registrar of the GCE board, Humphrey Monono told the minister that examination papers are printed as per the number of registered students and it will be logistically impossibly to allow unregistered students to take the exams.The minister insisted that the end of year examination in the northwest is a big problem and he is trying to seek a big solution to it.
Catholic schools have reservations
During the meeting most Catholic school principals were very vocal about the decision by the minister that that the end of year examination must hold, the principal of Our Lady Of Lourdes college told the minister that the students have been out of school since the December 9, 2017 and even though the gates are open, there are no students in the school. “Mr minister we of Catholic schools, we take time to train or students that is why we produce the results we produced year in year out”, she added. The same sentiments were shared by her colleagues of Saint Paul’s Collage and Saint Beads who added that they cannot give certificates to students who will not be able to defend it.
As concerns the guarantee by the minister that the state state will ensure the security of students and schools, some of the principals retorted “Mr Minister, forget about your so-called security because our schools are always targeted and when we call the police it is either they come too late or they don’t show up at all.
After the working session the minister paid a visit to four government institutions including; Government Bilingual High School Down Town, Government Bilingual High School Nitop (a school whose administrative block was burnt down some months back because they had classes on ghost town days) Government Bilingual High School Bamendakwe And Government Bilingual Teachers Training Collage .
GCE to be written under tight security
Prior to the minister’s visit, there was a mid-year evaluation meeting fondly called in the educational milieu as the Sector Conference which took place at GTHS Bamenda bringing together educational stakeholders of the entire Northwest region. The meeting that was chaired by the Secretary General at the Northwest governor’s office was aimed at brainstorming on security measures so that the end of year examinations will move on smoothly. Some of this measures adopted include: The guarding of examination centres 24/7 by security officials, no transportation of examination materials by bikes, body search of both students and visitors during the examination period using metal detectors, accreditation of food vendors amongst others.
“This school year was unique and the end of year examination should be unique” the regional delegate of secondary education, Mobaquet Victor told stakeholders. But some principles of school feared for their personal safety. They questioned what will become of them after the examination since some of them are already receiving threats from unknown sources.
The practical part of the GCE will commence today Monday, May 15, 2017 while the written part will start on June 15, 2017.

<https://thesunnewspaper.cm/dont-force-exams-troubled-people-mp-tells-minister/>

1. **Gov’t woos Diaspora with Forum slated for June 28-30 in Yaounde**

[June 27, 2017](https://thesunnewspaper.cm/govt-woos-diaspora-forum-slated-june-28-30-yaounde/)

By DOH JAMES SONKEY
The government of Cameroon is for the very first time inviting its over 5 million Diaspora population back home for a forum dubbed FODIAS scheduled to hold from June 28-30, 2017 at the Yaoundé Conference Centre.
Speaking at a press conference attended also by Communication Minister, Issa Tchiroma Bakary, Minister Delegate at the Ministry of External Relations in charge of the Commonwealth, Dion Ngute, Secretary General of the Ministry of External Relations, Felix Mbayu, External Relations Minister, Lejeune Mbella Mbella stressed that “the forum is so dear to the President of the Republic, H.E Paul Biya who constantly takes into account the difficulties and needs of the Diaspora.”

Minister Lejeune Mbella Mbella flanked by Minister Issa Tchiroma, MinDel Dion Ngute and Minrex SG, Felix Mbayu

Placed under the theme “Cameroon and its Diaspora: working together for the development of the Nation,” the first Cameroon Diaspora Forum is aimed at presenting government’s initiatives in favour of its Diaspora, to increase awareness of the Diaspora and to ensure the visibility of its actions in favour of Cameroon’s development and to set up a platform for communication and exchanges in order to improve conditions for an inclusive dialogue that would make it possible to capitalize the assets of this specific component of the nation  for the development of the country.
While inviting the Cameroon Diaspora to actively participate at the forum, Minister Lejeune Mbella Mbella expressed hope to see that by the end of it, a committee to monitor and evaluate the implementation of projects is created, a framework for permanent dialogue between the Government and its Diaspora through the Department of Cameroonians Abroad, is created, a database of all skills in all possible fields of Cameroonians abroad is created and finally to see into it that the Diaspora is greatly involved in local development back home.
The move that comes on the heels of fierce participation of the Diaspora in the ongoing Anglophone socio-political crisis and an outright condemnation of the regime by some citizens abroad is interpreted as an attempt to woo them in prelude to the 2018 presidential election in the country.
The SUN gathered that most citizens travel abroad out of frustration back home and are scared of returning home for any investment because the government is yet to accept dual nationality, thus they turn to look at the regime with a lot of suspicion.
The forum will be preceded by a pre-forum intended to help participants hold “B” to “B” meetings with national institutions competent in the realization of selected projects and to better present the know-how of Cameroon Diaspora to the national public and international partners.

<https://thesunnewspaper.cm/govt-woos-diaspora-forum-slated-june-28-30-yaounde/>

1. **Catholic Christians to storm court on July 25 as Kumba Bishop is also summoned**

[June 27, 2017](https://thesunnewspaper.cm/catholic-christians-storm-court-july-25-kumba-bishop-also-summoned/)

BY TALLA AGHAA CHRISTOPHER
Catholic Christians in the Kumba diocese have been called upon to pray and fast for their bishops who are standing trial after being dragged to court by the ‘Consortium of Parents’. They were equally called upon to throng the courts in a show of solidarity for their leaders.
The Bishop of Kumba Diocese His Lordship Agapitus Nfon Ignatius told christians that only prayers and not war will solve the current crisis currently rocking the North West and South West Regions of Cameroon.
The man of God made the statement as chief celebrant during the celebration of the Feast Day of the Kumba Diocese cum the feast of the Sacred Heart of Jesus on Friday 23rd June 2017 at the Secret Heart Cathedral.

His Lordship Agapitus Nfon was reacting to an announcement made by the Chairman of the Parish Pa Mesue that the Bishop has equally been dragged to the Kumba Court of First Instance via a direct summon on a seven count charge by the Consortium of Parents whose hearing is expected to take place on 25th July 2017.
Pa Mesue made it clear that the case has been filed by Barrister Achu Julius, lead counsel for the ‘Consortium of Parents’. The parish chairman while urging the Christians to intensify prayers for their Bishop, called on the Christians to storm the court on that day in their numbers to be living witness of the trial to be presided over by Justice Hannah Itoe epouse Egbe, President of the Kumba Court of First Instance. With this pronouncement made by the Parish Chairman, the Church burst into commotion.
Enter the Bishop
It was at this juncture that Bishop Agapitus disclosed that, “I didn’t want to make a statement on this issue but am forced to open up now”. The Bishop opined that only prayers, not war will help handle the crisis rocking the Anglophone Regions. The Bishop disclosed that with the prayers and fasting engaged by Christians of the Bamenda, Buea, Kumbo, Mamfe and Kumba Dioceses since Catholic leaders were dragged to court by the consortium of Parents, the case has witnessed various twists.
It should be recalled that the case had suffered several adjournments either in Bamenda or Buea. Today due to the prayers, the Bishop hinted, the complainants and their counsel are confused reason why while the Bishops of Buea, Mamfe and Kumba are expected to be in court on July 26, 2017, in Buea, the Consortium of Parents and their  Counsel have decided to file a direct summons against him in the Kumba Court of First Instance. The Bishop faced with this recent development, called on the Christians to intensify their prayers and fasting.
Talking to THE SUN, the Chair Person of the Parish Pastoral Team and Chair person of the Justice and Peace Commission for the Kumba Cathedral Parish, Barrister Beze Beje disclosed that it is rather unfortunate that the Bishop will stand trial in Kumba. He however maintained that the Christians will storm the court on that day as a show of solidarity to their Shepherd
Bishop on contact tour
Meanwhile, the Bishop of the Kumba Diocese is currently on a pastoral tour of the Diocese. The first lap rounded up on Saturday 16, June 2017 with a holy mass at St John Parish Kumba Town. At every stop the Bishop appreciated the people’s local beliefs, cultures and traditions but used them as possible ingredients to serve God. It should be recalled that Bishop Agapitus just clocked one year in office as the Pioneer Bishop of the newly created Kumba Diocese with a jurisdiction spreading across the Divisions of Meme, Kupe-Muanenguba, and Ndian.

<https://thesunnewspaper.cm/catholic-christians-storm-court-july-25-kumba-bishop-also-summoned/>

1. **Families still searching for missing loved ones in detention centres**

[October 24, 2017](https://thesunnewspaper.cm/families-still-searching-missing-loved-ones-detention-centres/)

By Wifah J.N
The recurrent message during the various meeting by Anglophone elites sent to the North West and South West regions to preach peace and dialogue with the population was for government to unconditional release all those who have been arrested in the context of the Anglophne crisis.
Many also called on government to account for those who have been killed and many who have been missing since the crisis erupted late last year.
Many parents who spoke to The Sun on the sidelines of these meetings recounted their personal ordeals and how they have been moving from one police cell to another in search of missing family members.

No comprehensive list has been given by government for those who have been arrested. This leaves families to worry whether their loved ones were actually arrested or killed during the protests.
News of a “mass” grave in Buea, reported by a local newspaper raised anxiety in the minds of family members who are yet to know the whereabouts of their loved ones.
In Limbe, a Mile 4 resident recounted how his neighbour was arrested in his home and how it took him several days to locate where he was being held.
In Ekona and Mile 16, many youths are reported to have fled into the bushes after military officers carried out numerous raids in the towns.
In Bamenda, several families told The SUN that After the bloody September 22, and October 1, 2017 protests in the North West region that witnessed some killings and numerous arrests, hundreds of families who failed to see their loved ones in cells across the region have been trooping into the neighbouring West region after they were hinted that the Bamenda central prison was full and so, those arrested have been transferred to Bafoussam pending further investigations.
Another family in Bamenda told the SUN that their son, Wainkem Michael, has been missing since the December 8, 2016 and they have been unable to trace him. He was neither amongst the first 21 youths who were released or the 55 others, including the Anglophone leaders who were released last August.

<https://thesunnewspaper.cm/families-still-searching-missing-loved-ones-detention-centres/>

1. **Agbor Balla, President of outlawed Consortium, reaffirms two-state federation stand**

[October 30, 2017](https://thesunnewspaper.cm/agbor-balla-president-outlawed-consortium-reaffirms-two-state-federation-stand/)

[Steve](https://thesunnewspaper.cm/author/angustephen/)

[No Comments](https://thesunnewspaper.cm/agbor-balla-president-outlawed-consortium-reaffirms-two-state-federation-stand/#respond)

On Tuesday, October 24, 2017 in London, Barrister Nkongho Felix Agbor Balla granted an interview to Focus on Africa on the BBC. In the interview with David Amana, Agbor Balla who is the pioneer president of the now outlawed Cameroon Anglophone Civil Society Consortium emphatically re-echoes his stand for a two-state federation. The following is the interview transcribed by Atia Azohnwi. Excerpts:-

What is the way forward now for the two English speaking regions of Cameroon? It has been more than a year since civil disobedience protests began. At the heart of the crisis are grievances over what people in the North West and south west regions feel as marginalisation by the francophone dominated government in Yaoundé. One of the men who called for the demonstrations last year is Nkongho Felix Agbor Balla, a lawyer and leader of the outlawed Cameroon Anglophone Consortium of Civil Societies. He is in London right now. He was actually released from a lengthy jail sentence early this year and stood accused on terrorism and treason charges. So why has government given him freedom to move around now?
I was accused of terrorism, secession, incitement to civil war, group rebellion, and also attempt to change the form of the state among others. There were eight charges against me.

And which of the charges do you admit to?
None of the charges, we were innocent of all the things that they said. We did not commit any crime. The consortium was clearly a non-violent organisation. We said it in all our communiqués and press statements. I think we were arrested because they felt that because of our leadership qualities, we were in total control of all what was happening. And our people listened to us. It was more of trying to see how they could kill the movement.

What about the charges calling for secession?
We never called for secession. If you read all the communiqués from the consortium, we talked about a two-state federation. The consortium had never spoken about independence, restoration and secession. And till date, that is the same position that we maintain. We were for a two-state federation; we have never been for secession, restoration or independence.

And that is how it started. You even have supporters in the US calling for independence at the UN, calling for a state called Ambazonia. What do you make of that?
Independence is a very emotional thing. People, everybody likes it. But I look at the reality. I am a realist. You know, I look at the feasibility of having it. I am for a federation [two-state federation] that will bring the Cameroons together – the Anglophones and Francophones – to build a stronger country. Let us be honest, we can have unity in diversity. We can respect each other’s specificity and cultural and linguistic differences. But we are a people, we are one, we can build a stronger nation by being together. I don’t think separation is the panacea for the time being.

And you will agree that is a softer line that calls for independence.
Yes! I think it is a more centric view. I think lots of Anglophones also are now talking about a federation. And I think we have moderate francophones who have joined the call for a federation. Prior to our arrest, federation was a taboo. Discussions about it were taboo. We think now that everybody understands at least that federalism is a form of government that can be acceptable to everybody. And it ends up being a win-win situation. So, it is a balance between those calling for restoration or Southern Cameroons’ independence and those who believe in a unitary state. So, if we can have a federal structure, it will help the country.

The children in those regions have not been going to school. It is over a year now. They stay away from school. And you were the leader of one of the organisations which called for parents to keep their children away from school. Do you still maintain that position?
When we called for kids not to go to school, it was not supposed to be a long term measure. It was supposed to be a short term measure to try to call the attention of the government to address the issues. I believe that now it’s time for kids to go back to school. I believe that it is time for the leadership in the Anglophone community to ensure that kids should go back to school. I urge the leadership to consider that kids should be able to go back to school.

And the ghosts towns, the disruptions to the economy, and small businesses; what should happen to those concerned?
It is a price that we all pay. I can understand a ghost town for one day. But when it is two or three days, I think it is heavy. Most of the business people that I talked to are okay if there is ghost town on Monday. But when you start making it for two or three days, especially in Buea which is considered the silicon mountain, it has a lot of effect on small businesses. They understand, they accept the fact that, I spoke to one guy who has a shop. He said “Presidént, if it is for one day, I understand it is my own price to pay”. We have to start thinking out of the box. We can still continue the struggle while not killing the goose that is laying the golden egg.

You were jailed for eight months. You suffered, but they have eased up on you now. Have you done some kind of deal?
Before I went to jail, I used to work in the UN. So, I have lived in the West for at least 17 years. I travelled at least three times every year. So, it is a continuation of who I am or the things I do. And let’s not forget, before I went to jail, for those who know me, I stay in my house that I built, my office, I own it. I think it is more about people who don’t know whom I am and who really don’t know the kind of person I am made of. But Dr. Fontem Aforteka’a Neba is there. We don’t have our ID cards, our bank accounts are blocked.

Are you in touch with him?
Yes! I mean, we live in the same town. We are constantly in touch.

Are you two still following the same path?
Yes! We are still following the same path. And like I said in one of my interviews on local TV in Cameroon, nobody did cut any deal. Since I left jail, there is nobody in Cameroon; there is no Anglophone in Cameroon who has made the kinds of statements that I have made since I left jail. I want to see one person who has made the statements that I have made since I left jail. Nobody living in Cameroon including the leaders of the opposition, including those who want to run for president, nobody has made the statements that I have made in Cameroon. For somebody who follows the political landscape of Cameroon, it would be shocking for someone to say that because I travel out of the country, [I have cut a deal with government]. I went to Ghana, that was on a UN-VP high level panel discussion on the future of governance in Africa and my ticket was bought by the organisers.

Before the beginning of next year, where do you want to be? Do you want to be in negotiations with Yaoundé?
I think the first thing is I am trying to lobby for us to have an all Anglophone leadership dialogue conference where leadership will meet and try to strategise on immediate, short-term and long-term goals.

So what you are saying is that you want to achieve unity first because you are disunited?
Yes! Among the leadership, there we can have an all Anglophone dialogue forum where everybody will sit hoping that we have a negotiation with government to address some of the issues.

But in the meantime, government is not waiting. You’ve got an election next year. President Biya is going to walk it, isn’t he?
Yes! And I believe that Anglophones also, we have to start thinking how to get into the political process. Because if we have 45-50 parliamentarians, with moderate francophones who are for a federation, then we can make things happen. We cannot be absent from the electoral process. We need to get involved. We need to try to see how we can create a movement; we need to try to see how we can bring likeminded people on board. Because even if we don’t go for elections, others will go, with our representation which will be the people we don’t like, but they will have to represent us for the next five years./.

<https://thesunnewspaper.cm/agbor-balla-president-outlawed-consortium-reaffirms-two-state-federation-stand/>

1. **Elites split over sharing of mission ‘booty’**

[October 24, 2017](https://thesunnewspaper.cm/elites-split-sharing-mission-booty/)

By Elah Geoffrey Mbongale
Government’s effort to solve the Anglophone problem and put an end to the ongoing crisis has understandably cost the state a lot in human and financial resources. This could be evidenced in the numerous trips by government officials to the affected regions and to numerous cities in the Diaspora to ‘dialogue’ with the Anglophone community home and abroad.
The heavy militarisation of the two affected regions in terms of personnel and military hardware, justified or not, is also burning a hole in the pocket of government coffers.
The peace and dialogue mission by some Anglophone elites to the North West and South West regions last week raised a lot of dust over the sharing of mission allowances amongst the elites.
According to our sources, the ‘peace mission’ cost the state circa FCFA 600 million and each regional delegation was expected to manage between FCFA 250-300 million.
The money was meant for transportation of elites and for food and drink during the talks with local communities. However, some of the elites who spoke to The SUN on conditions of anonymity queried why FCFA 500,000 was to be given to divisional officers and another FCFA 800,000 to chiefs of each division.
According to our sources, each division was entitled to about FCFA 2.1 million and the amount left nothing for the travelling elites who did all the field work, after the DOs and Chiefs’ cut had been deducted.
Rumours are also abound that some delegation heads confiscated the money meant for logistics and other members did not have their cut.
The SUN could not independently verify the authenticity of these claims as some of the elites and chiefs contacted remained tight-lipped.
Many Cameroonians have raised concerns over the amounts of money these trips, by government officials and pro-government elites, are costing the tax payer. Some are even suggesting that there might be a hidden interest to keep the flames of the crisis burning as many of these trips have ended in futility.
In August, the government sent multiple delegations to the Diaspora to try to explain the crisis to Cameroonians in the Diaspora. These missions that ended in total chaos in many countries also cost the state hundreds of millions of francs CFA.

<https://thesunnewspaper.cm/elites-split-sharing-mission-booty/>

1. **Top U.S. senators express worry over Cameroon**

[November 7, 2017](https://thesunnewspaper.cm/top-u-s-senators-express-worry-cameroon/)

By Elah Geofrey Mbongale
Two prominent senators of the United States congress; Senate minority leader, Charles E. Schumer (D) and Kirsten Gillibrand (D) have expressed concern regarding the worsening situation in Cameroon.
The two senators expressed their support of a unified Cameroon based on both equality amongst all language and ethnic groups and mutual respect and urged the US Secretary of State, Rex Tillerson and US Permanent Representative to the United Nations, Ambassador Nikki Haley to urge the US government to convey this position to the Cameroon government and to the Cameroonian community in the United States of America.

In the latter to Rex Tillerson and Nikki Haley dated November 1, 2017, the senators expressed worries over the reported deaths during the September 22 and October 1 demonstrations in the North West and South West regions of the country.
“We are concerned about the disturbing State Department and Amnesty International reports of live ammunition being used to disperse protests, mass arrests, increasing harsh crackdowns on freedoms of the press, severe restrictions on the movement of people living in predominantly Anglophone areas, and internet blackouts imposed by the government targeting the country’s English-speaking minority”, the letter reads in parts.
The Senators further expressed concerns as Cameroon is already being tested by Boko Haram activity in the North, and by tens of thousands of refugees flowing across the border from Central African Republic in the east.
“According to Amnesty International and subsequent media reports by CNN”, the letter furthered, “harsh tactics by state security forces, including allaged torture and extrajudicial killings, have occurred. It is our worry that such harsh actions are likely to further drive radicalization and anti-government sentiment in all affected regions, and undermine the intended impact of significant U.S. security assistance. We are further concerned that a failure to depolarize the current situation will result in larger challenges that devolve into a crisis that threatens regional stability, U.S. interests in Cameroon, and the lives of American citizens currently living and working there”, the letter concluded.

<https://thesunnewspaper.cm/top-u-s-senators-express-worry-cameroon/>

1. **Gov’t declares war against “terrorists” in NW, SW following killing of gendarmes**

[November 14, 2017](https://thesunnewspaper.cm/govt-declares-war-terrorists-nw-sw-following-killing-gendarmes/)

By DOH JAMES SONKEY
Government Spokesman and Communication Minister, Issa Tchiroma Bakary has revealed that the government has declared war against “terrorists” in the two Anglophone regions following the killing of three gendarmes in the North West and one in the South West regions.
Minister Tchiroma narrated that all started last November 6, 2017 when Gendarme-major DJONLAY Bienvenu was ambushed and then cold-bloodedly executed by criminals in Jakiri as he, at the request of the Principal of Jakiri Technical High School, came to disperse attackers who were on mission to expel teachers and students from the school campus.
According to Tchiroma, in less than 48 hours another terrorist attack happened on November 7, 2017 at the police-gendarme check point at Bafut when a hooded individual opened fire hitting Chief Warrant Officer, HINMA Dieudonné on the back, before disappearing into thin air.
Few hours later on November 8, 2017, student gendarme, SALI David, commissioned to ensure the security of “Collège Saint-Michel” in the Bayélé neighborhood of Bamenda, was found dead and his Kalashnikov service weapon was carried away, including all the ammunition he had on him. And finally in the night of 9th-10th of November, 2017, YAYA Emmanuel serving with the 22nd motorized Infantry Battalion attached to the 21st Motorized Infantry Brigade Battalion was brutally murdered by another gang of terrorists as he was answering nature’s call while on guard at the bridge linking Cameroon to Nigeria around the locality of AKWEM near Mamfe town, in Manyu Division in the South West Region.
Speaking at a press conference last November 10, 2017 in Yaounde, the Communication Minister insisted that after cajoling its opponents for so long since the crisis broke out, the government will leave no stone unturned this time around to end terrorist activities and restore peace and order in the North West and South West regions.
He sent a warning to the Ambazonia Defence Forces who claimed responsibility for the killing of the gendarmes to get ready to receive Cameroonian Armed Forces who are coming for them.
While presenting President Paul Biya’s condolence message to bereaved families, the Government Spokesman promised that the blood of the military men will not go in vain as government will make sure that Cameroon’s territorial integrity and national unity remain intact.
He disclosed that six suspects; WIRNGO Flavian BONKIKEH 32-year-old; NDZELAMONYUY Livinus WIRASHY alias Livi, 26-year old declared to have killed the gendarme in Jakiri; NJODZEKA Leonard SUILIY, alias ALIOU OUSSAM SYSTEM, 26-year old; WALA Ernest, 21-year old; NGORAN Livinus, alias Livi, 31-year old; and MDZEYUF Raoul alias AGÜERO, 23-year old were arrested with 12 ammunitions of 7.62 millimeters in the Misaje locality, of the Donga Mantung Division of the North West Region, as they attempted to cross the border into neighboring Nigeria.
Also, in reaction to the killings in Mamfe and other security threats in the South West region, the Governor of the South West region, Okalia Bernard Bilai issued and order restricting the circulation of commercial motorbikes and other gun control measures.
Early Sunday morning, security forces are reported to have stormed some villages around Muyuka, including Munyenge, Ekata, Bafia etc, in search of guns. The security forces are said to have been breaking into people’s houses, ransacking them in an attempt to find any illegal stuff.
It is not clear if the security forces succeeded to recover any firearms but reports hold that at least two civilians were killed during the raids

<https://thesunnewspaper.cm/govt-declares-war-terrorists-nw-sw-following-killing-gendarmes/>

1. **Agbor Balla to Eyumojock population: “Mount pressure for the release of all detainees”**

[November 28, 2017](https://thesunnewspaper.cm/agbor-balla-eyumojock-population-mount-pressure-release-detainees/)

BY ATIA TILARIOUS AZOHNWI
“I thank you all for the prayers and fight you put up to ensure our release when we were detained in Yaoundé. I thank you from the bottom of my heart. At the same time, I pray that you’ll continue to mount pressure for the release of our other brothers and sisters who are still in detention. We cannot move forward as a people when we have our brothers and sisters in detention. We also pray that you put pressure for those who are on self-exile to return.”
Barrister Nkongho Felix Agbor-Balla, Founder and Chairman of the Centre for Human Rights and Democracy in Africa, was addressing the population of Eyumojock on Sunday, November 19, 2017.
The meeting at the Catholic Church Hall was organized by HRM Chief Ntufam Ita and was attended among others by the clergy and five other chiefs.

Barrister Nkongho Felix Agbor Balla

“It was an opportunity to encourage our people who came from Eyumojock and surrounding villages, to keep up the pressure in order for us to free all of our brothers and sisters in prison,” Balla said in a statement.
According to the Human Rights Lawyer, “We need to live like one and as a family. There can be no true development if we are in dispersed ranks. When we burn our buildings, we will at the end be trying to rebuild instead of moving ahead. We are trying to provide free legal service to secure the release of all those arrested.
Those who are on self-exile have left behind their families and we have to try to see that they return. Let us dialogue. Let us keep praying that a solution to the problem is found.”
Agbor Balla used the avenue to highlight the need for unity within the Anglophone struggle and for Anglophones to avoid violence or hate against one another.
Hear him: “We have to do all within our powers to see that everyone returns. I have not come for politics. I am a child of this area. I am from Bakwelle and Besongabang. We will always have differences but we have to learn to live together. We have to live like brothers and sisters notwithstanding the differences.
We have to find solutions to the Anglophone problem but we must avoid burning schools, businesses, and stop attacks against people. We are fighting for better life for all of us, a better economic situation for all of us, a better legal and educational system. Let us not look for solutions to our problems by trying to destroy each other.”
Agbor Balla said the following in a statement after the visit:
During the visit, our delegation consulted with the local population of Eyumojock village and some surrounding villages.
The objective was to understand the demands of our people, listen to their worries and probe further into the human rights violations which have been persistent since the start of the crisis.
We met and held discussions with several families who recounted stories of abuses they faced.
During the meeting, Our people insisted on:
1. The unconditional release of their brothers and sisters from various prisons of the national territory.
2. Safe return from exile for their brothers and sisters and other persons who fled in fear of their safety due to rumors of several names on government lists to be arrested.
3. Withdrawal of the military from the region, because there have been systematic abuses by the army and this is causing the population to live in fear.
4. Guarantee for a safe return for everyone living in refugee camps and shelters in Cross River State, Nigeria.
5. National dialogue on the root causes of the Anglophone problem as prescribed by the United Nations.
After consulting with chiefs, leaders and women, it will be of high importance for us to come together and seek a solution for our brothers, sisters, families and children in refugee camps across the border, to return home; especially because the living conditions are poor and will expose them to the risk of health problems.
For a safe return of the refugees, we will put in place a means of transportation for the first groups of people willing to return home, we also need to coordinate with the authorities in Nigeria, who have been assisting, and the Governor of South West Region must accept a safe passage at the border.
Meanwhile, for many who cannot return home, we need to mobilize and support them.

<https://thesunnewspaper.cm/agbor-balla-eyumojock-population-mount-pressure-release-detainees/>

1. **President Paul Biya’s end-of-year message to the nation**

[January 3, 2018](https://thesunnewspaper.cm/president-paul-biyas-end-year-message-nation/)

**Fellow Cameroonians,**
**My Dear Compatriots,**
During the year just ending, Cameroon confirmed to the world, within a difficult context, the soundness of its institutions, the resilience of its economy and its attachment to national unity.
Indeed, our country demonstrated a remarkable capacity to meet the numerous challenges it faced in the sporting, security, economic or social domains.
Credit for such accomplishments goes first and foremost to you, the Cameroonian people! An overwhelming majority of you, whether from the North or South, East or West; whether Anglophone or Francophone, have always demonstrated courage, dynamism, patriotism and, above all, maturity.

**My Dear Compatriots,**
The adverse global economic situation due notably to falling commodity prices has negatively impacted economic growth and social progress in our country. It has also caused cash flow problems which have severely affected Government contractors, particularly small-and medium-size enterprises.
As part of its efforts to address this situation, in June 2017, the Government concluded an economic and financial programme with the International Monetary Fund backed by an “Extended Credit Facility”. This programme is expected to have a positive impact on our growth as from 2018.
To this end, we will maintain our efforts to optimize public revenue collection and streamline public spending. Special attention will be paid to the situation of SMEs especially in terms of settling the debt owed them and improving their access to bank loans.
We will also maintain our resolve to implement our major projects, with a special focus on road infrastructure. Community outreach services, notably water, electricity and health care will be given special attention.
Our country’s health map is getting denser each year, with the construction of about one hundred health centres, subdivisional medical centres and district hospitals.
We will continue our efforts to provide quality and universal health care to our population. In this regard, I have instructed the Government to finalize discussions on ways to progressively establish a universal health coverage system.
Remarkable progress has been achieved in implementing the projects included in the Three-year Emergency Plan. These are projects which foster true social progress within our communities. Such efforts will be continued.
The Government’s sustained action to increase the number of schools and universities make Cameroon a major pool of quality human resources in Africa. Similarly, we will step up our efforts to create jobs, particularly for our youth. In this regard, the completion of major projects such as the Port of Kribi, which will soon go operational, opens up bright prospects.
The IMF review mission fielded from October to November 2017 rightly hailed the resilience of our economy and our performance in implementing the programme concluded with this institution. This, you will agree with me, augurs well for our goal of achieving emergence.

**My Dear Compatriots,**
In the sports domain, the year which is drawing to a close brought us great victories which should be hailed. Our Football Indomitable Lions brilliantly lifted their fifth continental trophy. Our National Women’s Volleyball Team did us proud by emerging as the African Champion right here in Yaounde. On various stadiums worldwide, our flag was raised high and our national anthem resounded thanks to our sportsmen and sportswomen. The Cameroonian Nation, through me, extends its hearty congratulations to them.
As you are aware, in 2019, our country will host the large continental football family on the occasion of the Africa Cup of Nations. Beyond the purely sporting aspect, this will avail us an opportunity to offer our guests Cameroon’s warm hospitality. I have no doubt that, like our athletes, our population will rise to the occasion and showcase Cameroon at its best.
Our country will be ready for this grand celebration of friendship. I have made a commitment to that end.

**My Dear Compatriots,**
The issue of security was not the least of the challenges Cameroon had to address in 2017.
The Boko Haram terrorist sect continued its attacks against our country. Thanks to the bravery of our soldiers and the courage of our population, we inflicted heavy losses on this criminal group and annihilated its expansionist dreams. Definitely, vigilance remains the watchword. In collaboration with our neighbours and international partners, we will sustain our efforts to totally eradicate this terrorist group.
We also scored remarkable victories combating hostage-taking on our eastern border. We will step up efforts in that regard, and relentlessly track down the criminal groups involved.
In the North-West and South-West Regions, socio-professional grievances, which the Government nonetheless strove to address adequately, were exploited by extremists seeking to impose their secessionist plans through violence.
We all witnessed the seriousness of the spillover. The symbols of the Republic were desecrated. Our children’s education was compromised by criminal arsonists who did not hesitate to burn down schools and attack students. Economic and social activities were disrupted by irresponsible strike calls imposed on the population through threats, intimidation and violence. Bomb attacks were carried out. Many of our compatriots lost their lives in violence perpetrated by secessionists. Members of our defence and security forces were assassinated in cold blood in the line of duty.
I would like to invite you to spare a thought for all our fellow citizens who lost their lives in this crisis. On behalf of the entire Nation, I would also like to extend our heartfelt condolences to all the bereaved families.
As I reminded you recently, it is my duty to ensure republican order, social peace, the unity of the Nation and Cameroon’s integrity.
In this regard, I have issued instructions that all those who have taken up arms, who perpetrate or encourage violence should be fought relentlessly and held accountable for their crimes before the courts of law.
The security operations conducted to that end have already yielded excellent results. They will continue unabated, but without excesses. I congratulate the defence and security forces on the bravery, determination, restraint and professionalism they have demonstrated thus far.
I am aware that the wish of every Cameroonian of good will is to see an end to tensions in the North-West and South-West Regions and a return to normalcy. The vast majority of Cameroonians aspire to live together in peace.
Bearing in mind this aspiration, I set up the National Commission for the Promotion of Bilingualism and Multiculturalism which will play a key role in promoting our togetherness.
It is in the same light that, at the onset of the crisis, I requested the Government to engage in a constructive dialogue with English-speaking teachers and lawyers to seek solutions to their demands. The Government took many actions following the dialogue, even going beyond the initial demands. Others are ongoing or in the pipeline.
I should make it very clear that, to my mind, dialogue has always been and will always remain the best means of resolving problems, so long as it is strictly in line with republican legality.

**My Dear Compatriots,**
My conviction that our fellow citizens desire greater participation in managing their affairs, especially at the local level, has been strengthened by the consultations I have held and the many opinions and suggestions I have received.
In this regard, it is my firm belief that fast-tracking our decentralization process will enhance the development of our Regions.
To that end, I have ordered the implementation of the necessary measures to speedily give effect to this major reform.
In the same vein, the completion of the establishment of the institutions provided for in the Constitution will contribute towards consolidating the rule of law and open a new page in our democratic process.
The year 2018 will be an important election year. All necessary measures will be taken to ensure that elections are held in peace and security.

**My Dear Compatriots,**
As you can see, our Nation is facing multiple challenges which we should address together in fraternity, with due respect for our institutions and in a spirit of national concord.
In this light, Cameroon is a precious legacy for each and every one of us.
Let us remain worthy of our legacy, of a united Cameroon, standing tall, proud and jealous of its freedom.
**Happy New Year to you all!**
**Long live Cameroon!**
**Yaounde, 31 December 2017**

<https://thesunnewspaper.cm/president-paul-biyas-end-year-message-nation/>

1. **Biya’s end of year message: War on separatists continues…without excesses**

[January 3, 2018](https://thesunnewspaper.cm/biyas-end-year-message-war-separatists-continueswithout-excesses/)

By Elah Geofrey Mbongale
The president of the republic, Paul Biya has announced that security operations in the North West and South West regions of the country will continue unabated following the recent killings of military officers in the region.
The head of State was speaking during his annual end-of-year address to the nation last December 31, 2017.
The president, while regretting that socio-professional grievances that were tabled by lawyers and teachers were exploited by extremists seeking to impose their secessionist plans through violence, promised that all those who have taken up arms, who perpetrate or encourage violence would be fought relentlessly and held accountable for their crimes before the courts of law.
“Our children’s education was compromised by criminal arsonists who did not hesitate to burn down schools and attack students. Economic and social activities were disrupted by irresponsible strike calls imposed on the population through threats, intimidation and violence. Bomb attacks were carried out. Many of our compatriots lost their lives in violence perpetrated by secessionists. Members of our defence and security forces were assassinated in cold blood in the line of duty”
The head of state went further to congratulate the defence and security forces on the bravery, determination, restraint and professionalism they have demonstrated thus far.
The president, as many others have been saying for a long time now, also prescribed dialogue to solve the current crisis but said it must be within legality.
“I should make it very clear that, to my mind, dialogue has always been and will always remain the best means of resolving problems, so long as it is strictly in line with republican legality”, President Biya added.
While many political pundits have been quick to observe that the president tone during his current address was less confrontational that that of December 31, 2016, others also noticed the president’s failure to use lines like ‘One and indivisible Cameroon’, ‘Form of state is non-negotiable’, being words that have marked the political dictionary of the nation over the just ended year.
Also interestingly, the president did not call those he describes as fanning violence in the North West and South West regions “Terrorists”, as was the case on the day he declared war against ‘Anglophone terrorist’ at the airport upon arrival from Abidjan, Ivory Coast. The president preferred milder words like ‘Criminals’ and ‘Secessionists’.
Reacting to the president’s New Year address, the Chairman of the leading opposition party, SDF, Ni John Fru Ndi, accused the president of failing to personally supervise dialogue in the Anglophone regions.
He accused the president of being the real secessionist, evidenced in the way he has handled the crisis. “How can you declare war on an unarmed people and restrict internet for months in the North West and South West regions”, Fru Ndi demanded while saying that Mr. Biya is only concerned about military deaths and is yet to acknowledge civilian deaths by the military.
Sisiku Ayuk Julius says self defense is a universal human right
Speaking through social media, the self-declared President of the virtual Federal Republic of Ambazonia, Sisiku Ayuk Julius Tabe, who had hitherto condemned killings on both sides, announced his support for the separatist fighters across the North West and South West regions.
“This Interim Government stands with the youths and supports them because self-defense is a universal human right protected under the charters of the United Nations. The forces of occupation in our territory, especially those deployed in Mamfe and the rest of Manyu are suddenly realizing that no matter how equipped and trained an army can be, it cannot break the will of a people who have been incessantly deprived of human dignity and freedoms”, Sisiku Ayuk Julius said.

[https://thesunnewspaper.cm/biyas-end-year-message-war-separatists-continueswithout-excesses/#](https://thesunnewspaper.cm/biyas-end-year-message-war-separatists-continueswithout-excesses/)

1. **Tension in Bamenda ahead of SDF Convention**

[February 22, 2018](https://thesunnewspaper.cm/tension-bamenda-ahead-sdf-convention/)

– SDF defies separatists’ threats
– PCC bows to pressure
– Convention venue moved to Congress hall
– I’ve never been stumbling block to Anglophone problem – Fru Ndi
– Party set to choose presidential candidate other than Fru Ndi
– Intrigues over delegates heightens tension

BY ATIA TILARIOUS AZOHNWI AND SAH TERENCE ANNIMBOM
The contest to pick a presidential candidate to represent the opposition Social Democratic Front (SDF) in the 2018 elections and the renewal of the National Executive Committee of the party is raging to palpitating levels.

Tension has heightened in Bamenda as the 9th Ordinary Elective Convention of the party opens on Thursday, February 22. And in the latest twist the party has moved the venue to the Congress Hall at the heart of the town instead of the Presbyterian Church Ntamulung Hall.
**PCC bows to separatists’ threats**
In a brief release sent to our newsroom late on Wednesday, February 21, jean Robert Waffo shadow cabinet minister incharge of communication said the PCC authorities decided to bow to pressure to separatists’ threats and withdrew the authorisation it had given the SDF to hold its convention.
Over the last 24 hours there has been serious behind-the-scenes exchanges between the SDF hierarchy and that of the PCC. Late on Tuesday, we hear the Moderator of The Presbyterian Church, the Rt. Rev. Fonki Samuel was in a long telephone chat with the national chairman, Ni John Fru Ndi and on Thursday morning SDF authorities were upbeat about the convention holding at the PCC Ntamulung premises.
There were also security guarantees from government notably North West governor, Adolphe Lele L’Afrique. In the end it seems all this was not enough to quieten the worries of the PCC hierarchy.
The moderator had received a strange call promising him hell should the SDF convention go on as planned at PC Ntamulung.
The convention is holding amidst socio-political tensions in the North West and South West Regions of the country.
In fact, the SDF party hierarchy has been receiving threats.
A similar call was placed to the incumbent National Chairman of the SDF, Ni John Fru Ndi. The caller who presented himself as Kapo Daniel and a member of the Ambazonia movement warned that the outcome will be severe if the SDF Convention is not moved to Bafoussam or Yaounde. The said Kapo told Fru Ndi that his convention was going to pose a threat to their struggle and that he advises him because he sees him as a father to move the convention.
He acknowledged however that he respected Ni John Fru Ndi so much but held that “they” do not want any political rallies in Ambazonia not even the SDF and that if Fru Ndi went on with his convention then he should be ready to bear the responsibility for the outcome. Fru Ndi, on his part, reminded the young man the role he has played in the shaping of the face of the country and told him that they the activists should create an environment where they can discuss and that they should stop ordering him Fru Ndi do this or that. At the end of the lengthy conversation Fru Ndi reiterated that he will hold his convention in Bamenda.
Fru Ndi says he has never been a stumbling block to the Anglophone problem and sees no reason why he and the SDF should be targeted by separatists.
The SDF, it would be recalled took parliament hostage late last year insisting that solutions to the current crisis be found. Fru Ndi does not know why those who claim to be representing the interests of Anglophones would want to block the SDF from holding its convention.
The SDF convention was due to hold in 2016 in keeping with Section 12(2a). But the convention was pushed to February 2017. The socio-political unrest has caused the holding of the elective convention to drag on. The unfortunate turn of events when the CPDM held a rally on December 8, 2016 in Bamenda informed the decision of the SDF to hold on.
But the party has been pushed to the wall. They have to renew the executive committee of the party and to choose the party’s presidential candidate well ahead of time. In the past, presidential candidates of the party were chosen only a month to polling day. This time around, the need to choose the candidate and popularise him with the electorate cannot be compromised for anything.
Meanwhile, the SDF district Chair for Bamenda II was threatened by two boys at the Ntahghem hall for bringing along an ELECAM official to register voters during the a credit union annual assembly. The said boys warned him that if he knew what was good for him he should go away immediately before he regrets what will happen to him. They told him and the ELECAM official that there will be no elections in Ambazonia.
**The stakes**
For the first time in the 28-year-existence of the SDF, the party will be presenting for presidential elections a candidate other than the National Chairman, Ni John Fru Ndi.
Three members of the National Assembly – Hon. Joshua Nambangi Osih, Hon. Joseph Njang Mbah Ndam and Hon. Simon Fobi Nchinda – will battle for a ticket to the 2018 Presidential elections. The party’s choice will be made at an extra Ordinary Convention on Saturday, February 24, 2018 in keeping with Section 12(2) of the SDF constitution.
**Tight races**
The position of 1st Vice National Chairman will also be hotly contested between Hon. Joshua Osih and Prof. Ndiva Kofele Kale. Hon. Osih needs to succeed himself in order to keep his presidential ambitions intact.
But Prof. Ndiva Kofele Kale, a constitutional law expert believes that he is the right man for the job. All attempts at urging Prof. Kale choose some other office have been unfruitful.
Hon. Fobi Nchinda Simon is also putting up a spirited fight to oust long-serving SDF Secretary for Communication, Beatrice Anembom Munjo. Henry Kejang from the Littoral will be fighting to secure the office of 1st Vice Secretary for Communication.
**Intrigues over delegates heightens tension**
Ibrahim Aladji Soulemanou, Regional Chairman of the SDF in the Centre is complaining that the list of delegates he sent for accreditation has been greatly adulterated. He has vowed that he will be going to the convention ground with the list of delegates he had prepared with his District Chairmen.
It is alleged that the adjustments made on the list from the Centre is not unconnected to Hon. Mbah Ndam’s ambition to outsmart his rivals to pick the SDF ticket for the upcoming Presidential Elections.
In another move seen to be orchestrated by Hon. Mbah Ndam, the Adamawa Regional Chairman of the SDF was designated to coordinate delegates to the convention from the North and Far North. Members of the SDF in these regions are complaining bitterly. They ask why their regional chairmen will have to receive instructions from the Regional Chairman of Adamawa.
Allegations have it that Senator Tsoumelo, the Secretary General of the SDF is in alliance with Hon. Mbah Ndam to give him an upper hand in the elections. The SUN could not, at the time of going to press, independently confirm these allegations. Hon. Mbah Ndam’s supporters have charged back that these are mere smear campaigns on their candidate who has a grip on the grassroots.

**Accommodation headaches**
It is most likely that some delegates to the 9th Ordinary Elective Convention of the SDF may be lodged in halls; instead of hotels like was the case during the last convention in 2012.
Some of the delegates are complaining that were Ofon Mathias not sidelined from the organisation of the convention this year; they would have had decent lodging facilities.
We were unable to get to Hon. Awudu Mbaya who is incharge of general organisation of the convention.

<https://thesunnewspaper.cm/tension-bamenda-ahead-sdf-convention/>

1. **ICRC trains SW journalists on armed conflicts, situations of violence**

[March 6, 2018](https://thesunnewspaper.cm/icrc-trains-sw-journalists-armed-conflicts-situations-violence/)

By Ikome Christie-Noella Eposi in Buea
Over 15 journalists from the South West region have recently benefited from a two day workshop organized by the International Committee of the Red Cross.
The workshop which was aimed at training the media personnel on how to tackle situations of armed conflicts and violence took place in Buea and was headed by the coordinator for prevention and communication of the Internal committee of the Red cross, Richard Desgagne.
From February 27-28, 2018, the participants were schooled on the ICRC and its activities in Cameroon, various laws governing armed conflicts and how journalists are supposed to go about reporting events of armed conflicts and situations of violence.

The ICRC was established in 1863 and helps people around the world affected by armed conflicts and other violence.
As an independent humanitarian organization, the ICRC protects the dignity of persons and relieves them of their suffering by providing basic necessities such as, safe drinking water, food, sanitation, shelter, medical aid etc
Four basic principles guide the Committee of the Red Cross throughout their humanitarian mission: Humanity, impartiality, independence and neutrality.
The ICRC equally ensures that the main role of protection, assistance, prevention and cooperation is maintained.
As concerns the protection of Journalists by the ICRC in situations of armed conflicts/violence, it should be noted that, in accordance with the international humanitarian law, journalists engaged in assignments in areas of armed conflict must be respected and protected, as long as they do not take action adversely affecting their status as civilians.
“The ICRC has been in existence for more than a while now and we have been carrying out activities, humanitarian operations. It is important for journalists to have exchanges where the ICRC can pass its humanitarian objectives across to them so as to enable the journalists spread the message to those victims of armed conflicts and situations of violence, so that they can be aware of the aid/ opportunities which can be offered to them by the International Committee of the Red Cross. Such a seminar will also go a long way to aid journalists in carrying out their reporting/ broadcasting of issues or stories relating to conflicts situations” Richard Desgagne told reporters.
He equally added that, though the committee is doing nothing yet concerning the crisis situations in the North West and South West regions of the country, they are already working on detention cases, by providing basic facilities for those in detention. He said the committee needs to carry out more evaluation concerning the crisis in the Anglophone regions of Cameroon and see if there are needs or not to chip in their assistance before a move could be taken.
Rosine Kam Belinga, also in charge of Communication at the ICRC and one of the main speakers during the 2 day workshop told the press that, the seminar organized in Buea is to tell journalists of what they ought to do and not do in situations of violence and armed conflicts. She encouraged journalists to not only focus on what is going on so that they can fulfill their obligations by getting a news item, but they should equally go further to investigate properly and offer a helping hand to victims of violence and armed conflicts if need arises.
“Journalists should be neutral in reporting an incident. They shouldn’t be biased and they should equally be objective” she added.
One of the keynote speakers, Ghislain, equally an active member of the ICRC, said in addition to the many obligations of the committee, they equally ensure that the rights of women and children in particular are expected.
“Children deserve special respect and should be given the care and help they need because of their age, the protection against all forms of sexual violence, reunification of unaccompanied children with their families are some of the preoccupations of the ICRC” he added.
Some senior journalists like Charlie Ndi Chia and Henry Mekole were equally invited at the seminar to share their experiences with the participants as well as tell them how to go about covering crisis in the country.
At the close of the event, participants were asked to produce a paper on the Red Cross and its activities in the country as well as examine the role journalists have to play in crisis or violence situations.
The ICRC functions in 80 countries around the world and has a majority of over 16,000 staff members.

<https://thesunnewspaper.cm/icrc-trains-sw-journalists-armed-conflicts-situations-violence/>

1. **Govt’s emergency relief plan**

[June 26, 2018](https://thesunnewspaper.cm/govts-emergency-relief-plan/)

At a time when the people of the North West and South West regions are being overwhelmed by desperation and uncertainty about their future, any pronouncements coming from above and leaning towards some semblance of a solution can always sound consoling. It will certainly raise hopes for the desperate. Following the Head of State’s instructions, the Prime Minister, Head of Government on June 20 unveiled a FCFA 12.7 billion emergency humanitarian assistance plan in the North West and South West Regions to provide relief to victims affected by the on-going crisis and to embark on the reconstruction of damaged infrastructure in these areas. This is some good news after all. But to cynics, however, it is a projection to be watched keenly.

The plan involves raising money with which the hand of solidarity will be extended to victims of the war declared by the Head of State on the so-called secessionists of the two Anglophone regions. It is no longer a secret that most of those to whom we are only now extending our hand of solidarity, have been for more than a year rendered homeless. Some have lost their beloved ones and forced to flee from the carnage only to take refuge either in bushes, neighbouring villages and cities or, even neighbouring countries.

**While we welcome the initiative of the Head of State, we think it has not just come a little too late after second thought but also not likely to make much difference. We are also certain that this initiative stands out far from what can be seen as a lasting solution to the present crisis and that government is simply hardening its stand against what has been the general call for an inclusive genuine dialogue.**

We are therefore hereby ascertaining our belief that government has always assured itself that the best way to solve the problems of this country to the best of its advantage is to brandish money as a bait to calm down tempers. It hardly ends up with the expected results.

Two years since the eruption of this problem, which started with the Common Law Lawyers and Teachers, is time enough for government to have realised that every attempt proposed and carried out in their own perception of a solution has always been a colossal failure. The Musonge National Commission for the Promotion of Bilingualism and Multiculturalism made some inroads in which the reports showed that federalism was the ultimate solution right from the onset. Yet since this report was presented to government, government has simply displayed its unwillingness to accept this truth, pressing rather for its war option. Should this therefore be taken as government not having confidence even in its own commissions? We think government is only complicating issues instead of being honest to itself and the Anglophones.

For instance, in announcing the Head of State’s National Solidarity Plan for Anglophones, the Minister of communications, Issa Tchiroma further complicated issues when he posed the question at a press conference in his office when he doubted with who shall government dialogue? Minister Tchiroma might only be ignoring the fact that in a genuine, inclusive and honest dialogue which seeks to settle a problem once and for all, such questions have no place in the process. No preconditions are likely to provide a level ground for such a lofty mission as dialogue for reconciliation and not for war. Therefore if it is to be the inclusive dialogue that is being preached, even the so-called terrorists should be included. It worked in Colombia which ended many years of fighting.

In the first place Mr. Tchiroma ought to have understood that even the commissions and emissaries who have been sent out in the name of dialogue, beginning with Common Law Lawyers and then Teachers, are not competent enough to dig deep into the real problems of the Anglophones, which is why they failed because they merely scratched the surface. If the Minister therefore persists on his question of who to dialogue with, we consider it pertinent to throw back the same question in another way: who did government dialogue with during the Tripartite Talks in the early nineties?

**Under the present circumstance, call them terrorists or bandits; the world acknowledges them as a group that must be having some grievances to address. That they have leaders, some of whom have been arrested and are believed to be in the custody of government is only pertinent for us to hide our pride and self-righteousness into the mud of history for the sole purpose of seeking a lasting solution to this crisis and include them in the dialogue process**. Our pride and ego will obviously lead us to nowhere near a solution. Nor would a military victory provide the much parroted national unity and national integration.

In another development, we welcome the latest appeal by the governor of the South West region, Bernard Okalia Bilai for those still hiding in the bushes to return home, so that a peaceful dialogue could be held. We welcome his appeal only because it mentions the words a ‘’peaceful dialogue.’’ We have always re-iterated the necessity for dialogue.

But what constantly intrigues us whenever the mention of dialogue comes from such men as the governor or others in government is that the form of such dialogue has never been stated with sincerity. It is difficult to believe that such an appeal can easily convince the victims of this war to feel safe if and when they decide to go back to their homes.

We think there is a lot to be done, one of which is for the Head of State to call for an unconditional cease-fire on both sides, in the supreme interest of peace. We have certainly arrived at the point where guns must be silenced to pave the way for the organisation of a broad-based, inclusive, honest dialogue void of prejudice.

<https://thesunnewspaper.cm/govts-emergency-relief-plan/>

1. **Monday of ghosts, bullets, mourning in NW, SW**

[July 13, 2018](https://thesunnewspaper.cm/monday-ghosts-bullets-mourning-nw-sw/)

By Atia Tilarious Azohnwi, Talla Agha Christopher and Sah Terence

Heavy gunfire broke out on Monday in Buea, capital of Cameroon’s South West Region gripped by violence between Anglophone separatists and security forces for two weeks now.
An apparent gun battle between security forces and separatists is believed to have originated from the Mile 17 bus station before spreading to neighbourhoods like Mile 16, Muea, Molyko, Malingo, Checkpoint, Bonduma and other areas.
“Separatist fighters entered several areas of the city and started firing. The army and police have retaliated,” witnesses say.
Several vehicles belonging to an agency were burned at the Mile 17 Bus Station in Buea and people are hunkered down at home.
Years of resentment at perceived discrimination at the hands of the francophone majority fuelled demands for Anglophone autonomy, which on October 1 last year culminated in a symbolic declaration of independence.
Radicals named Buea as the capital of the self-declared state, Ambazonia, which has no international recognition. A government crackdown then followed, plunging the two regions into almost daily acts of violence and retribution.
According to a government report last month, separatists had killed 74 soldiers and seven police officers since late 2017 while more than 100 civilians had died over the past 12 months.
Over 10 persons including security officials reported succumbed to the cold hands of death under pain from bullet wounds. Economic losses were also recorded.
On Tuesday, just when things were about to pick up after Monday’s ghost town, gunshots again grounded the town for a greater part of the morning. Activities would later timidly resume.
Media reports from Kumba Tuesday morning indicated that several corpses are still being discovered from Monday’s deadly clashes. Going by the reports, a yet to be identified man, dressed in just a sleeping short trouser is believed to have been dragged from his home, killed in the night and dumped by the roadside.
Meanwhile, the entire population of new layout Fiango, a popular area in Kumba, is reported to be packing out as another showdown between the military and separatists is gradually building up. The denizens parking out are said to have received warnings from the restoration forces to quit the area ahead of an anticipated attack on the military camp.
In a related development, the District Chairman of the Ekondo-Titi Electoral District of the Social Democratic Front, SDF is currently receiving treatment at the Ekondo -Titi District hospital. HRH Chief Motase Wangaga sustained injuries on his legs from a stray bullet following gun exchanges between the military and separatists in Ekondo-Titi subdivision.
In Mbonge and Konye, most of the populace is still in the bushes following violent clashes between Security Forces and separatist with most houses in the respective areas burnt down, increasing the number of internally displaced persons.

Week of killings, destruction and terror in North West
Responding to government’s announcement of humanitarian emergency plan to victims of the crisis in the North West and South West Regions, separatists are seemingly trying to send warning signals to government by stepping up attacks on military personnel and installations. Security officers were attacked in Batibo, Belo and Njinikom within the week and in Bambili during the evening hours of Saturday, July 7, 2018. This attack in Bambili caused commotion around Bambui and Bambili as many people rushed home for fear of the unknown.
The commotion was even more intense because the Amba Boys had issued a warning telling the university students in Bambili that Saturday, July 7, 2018 should be their last day to go to school. Responding to this threat, security around the campus has been beefed up.
“Since we started writing our exams we have never had guards around the building but yesterday Saturday was different because we had four guards outside though they were only campus police who can do nothing if Amba Boys come,” a student told The SUN Sunday morning. The student went on to state that there were more military forces around the main campus than ever before since the threats were issued.
The separatists have intensified their use of charms to fight the military in Boyo division, putting sophisticated concoctions along the road and blocking the road around MC2 Njinikom with a coffin probably containing deadly charms.
Many people have continued to flee from Fundong, Njinikom and Baingo to Bamenda and other relatively calm towns. Most of them trek over 50 kilometers going through the hills and valleys of Mentang to Mbam via Mbueni to Kikfuini and to Mbingo moving only in the bushes and always staying at least 5 kilometres from the main road for fear of being caught by a stray bullet.
Despite the escalating crisis, President Biya in his usual rigour policy attitude decreed October 7 as the date for the country’s Presidential elections. Biya’s decision to convene the electoral corps despite the tensions in the country’s English speaking regions has been regarded by many Anglophones as ‘adding insult to injury’.

<https://thesunnewspaper.cm/monday-ghosts-bullets-mourning-nw-sw/>

1. **All Bakweri conclave registers massive boycott**

[July 31, 2018](https://thesunnewspaper.cm/bakweri-conclave-registers-massive-boycott/)

By Ikome Christie-noella Eposi in Buea
The All Bakweri Forum convened by Buea Mayor, Ekema Patrick Esunge took place yesterday, July 29 at the Buea Council Hall with the attendance of youths, men and children of the Bakweri clan.
But the meeting was unprecedentedly boycotted by Bakweri elites. Many Bakweri Traditional Rulers, Mayors, DOs, Lecturers, Ministers, Parliamentarians and other high profile personalities boycotted the forum. Even the Buea CPDM Section President who is a Bakwerian was not in attendance.
Among the prominent people in attendance was Mayor Ekema himself along with his deputies, except Motomby Mbome who apparently was unavoidably absent.
In the meeting dominated by the Bakweri dialect, the mayor said groupings like the Presbyterian Church in Cameroon, headed by a deceitful leader in the name of Moderator who is a pure North Westerner who pretends to be a South Westerner. He said because of the lies and deceits perpetrated by the PCC Moderator, he no longer attends service at the Presbyterian Church because he cannot accept to be under such a deceitful mandate.
Ekema blamed the church for escalating the crisis especially the holding of the so-called Episcopal Conference in Bamenda. The Mayor blamed some Bakweri elites for spearheading the crisis by communicating with secessionist in the diaspora. He urged his tribesmen to combat the element of fear.
Below is a transcript of what Mayor Ekema Patrick Esunge told the Press at the end of the meeting:-
“I signed a circular inviting Bakwerians to discuss the ongoing socio-political impasse. And to our greatest dismay, on Friday, one of the issues we had to discuss at the meeting had to do with the release of the abducted chiefs. Unfortunately, one of them was killed by these Markizas on Friday.
“If you observed, the tone of the meeting changed. And now, we are looking forward towards retaliation. We cannot sit quiet. We cannot stay mute when such things are happening in our community. There are communities where to stretch your hand to greet a traditional authority is a sacrilege, it’s forbidden.
“You take our chiefs, abduct them, assassinate and put them at gunpoint to make inflammatory statements. Enough is enough! I think we shall go to the field and have a direct confrontation and see who is going to be the net loser.
“If you followed my press release, we invited Bakwerians to meet and dialogue. In my introductory statement, I spoke in the Queen’s language. But I was called to order by participants that it was a Bakweri forum so we had to flow in the dialect.
“There are two major resolutions taken at this meeting: the first is that Bakwerians are going to mobilise themselves on Tuesday to take a common stand in view of the release of the abducted chiefs and to sanction the assassination of the Chief of Lysoka Moliwe. Definitely, it will be peaceful. But 24 hours thereafter, it is going to be violent.
“The second resolution taken at this meeting as the people’s representatives, we have been mandated to stop the so-called Anglophone Conference or meeting purportedly called by the retired priest. We are going to restrict his visit to our municipality.
“Remember, at the beginning of this crisis, the clergy met severally in Bamenda to frustrate school resumption. And we have a feeling, a very strong one, that meeting again in August at the eve of school resumption is another ploy to destabilise the effective resumption of schools in September. We don’t want that. He should hold his meeting in Douala or he should go to Banson and hold that meeting. I don’t want to hear it! Whether it is the Head of State who authorises him, we don’t want that here. That is my competence and I am going to exercise it fully.”

<https://thesunnewspaper.cm/bakweri-conclave-registers-massive-boycott/>

1. **Kumba-based cocoa merchant under attack from separatists, security forces**

[August 14, 2018](https://thesunnewspaper.cm/kumba-based-cocoa-merchant-attack-separatists-security-forces/)

BY TALLA AGHA CHRISTOPHER

Economic operators and top shot business magnets in the English speaking regions of Cameroon are now in danger form separatists advocating for the independence of a state they call Ambazonia – North West and South West regions – as well as from security forces who have since been accused of committing untold atrocities.

While separatists have since been on the throat of Akanji Martin Mbah for him to support their struggle, security forces crumbled his businesses through their arson attacks on villages in Anglophone Cameroon.

Homes, warehouses and shops have been razed down to ashes by soldiers battling separatist in Munyenge, Kwa-Kwa, KukeMboma, Bekora, and Bole in the South West Region, Barrister AgborNkongho has said.

The Human Rights lawyer says over 200 villages have been burnt since the crisis erupted in 2016.

Unfortunately, Akanji Martin Mbah owner of large expanses of Cocoa plantations is among the hardest hit by the crisis. A farmer said to harvest over 20,000 tons of Cocoa according to figures got from Sic Cacao in Douala is said to be on the run. His family members and workers have become targets to both security forces and separatists. It is not known what has become of his children and workers who are no longer safe in the hands of both parties in the armed conflict.

Many companies have been crumbled by the crisis with the Cameroon Development Corporation (CDC) and Pamol Plantations having to suspend operations. Several workers of the CDC have been maimed in plantations in Tiko, while others have been kidnapped and killed. Plantations in the restive regions have been abandoned in ruins with no hope in sight.

Soldiers accuse business magnets to be sponsoring the war, while separatists are quick to tag economic operators as blacklegs and enablers.

Common Law Lawyers in Cameroon went on strike in October 2016 to protest government’s attempts to annihilate the Common Law practice in a constitutionally bilingual and bi-jural Cameroon. The strike lasted for over a year.

Anglophone teachers in the country joined the strike on November 21, 2016 to uphold Anglo-Saxon values under threat in Cameroon’s two English-speaking regions. Same day, ManchoBibixy staged a coffin revolution at Liberty Square in Bamenda to protest against the marginalisation and economic deprivation of Anglophones.

Matters came to a head on Thursday, December 8 when the population of Bamenda took to the streets to denounce the politicisation of a strike action they consider genuine and borne of longstanding grievances.

Days of ghost town have since been observed throughout the South West and North West Regions of the country.

On January 17, 2017, Barrister Nkongo Felix AgborBalla and Dr.FontemNeba, leaders of the Cameroon Anglophone Civil Society Consortium (CACSC) were arrested moments after the consortium had been banned along with the SCNC.

SisikuAyukTabe, president of the self-styled state of Ambazonia was arrested in Nigeria on January 5, 2018 along with nine other members of his cabinet including Tassang Wilfred, NforNgalaNfor and Barrister EyambeEbai.

The government crackdown on Anglophone activists has since intensified with arbitrary arrests, detention, torture and extra-judicial killings becoming the new normal.

The fate of many remains precarious as security forces battle separatists. President Paul Biya has since taken a tough position on the crisis in the two-English speaking regions. Guns have since taken the place of dialogue and peace.

<https://thesunnewspaper.cm/kumba-based-cocoa-merchant-attack-separatists-security-forces/>

1. **Lockdown in North West, South West after polls**

[October 11, 2018](https://thesunnewspaper.cm/lockdown-north-west-south-west-polls/)

By Atia Tilarious Azohnwi
Vote counting is underway after Sunday’s presidential vote. The polls were marked by deadly violence in the English-speaking North West and South West Regions. But the African Union and other observers give it a clean bill.
The capital of the South West Region, Buea, woke up to a ghost city, a day after the election. No movements were rare – only the vehicles of the security forces were patrolling the streets. This, however, has been caused by secessionists. Their aim is to show the French-dominated government in Yaoundé that it has no power over the English-speakers in the North West and South West regions of Cameroon. The previous day, the few who turned out to vote did so under massively tightened security.
At least two people in Bamenda, believed to be separatists, were shot dead by security forces, and gunshots were also exchanged in Buea. One election official was reportedly injured.
When Bernard Okalia Bilai, the governor of the South West region, came to vote at the Buea Appeal court, he was heavily guarded and escorted to the polling room. “We have heard that in some areas terrorists tried to intimidate the population, but defense forces reacted promptly,” Okalia said. “Terrorists” is how government describes the secessionists.

**Separatists shunned the election**

“We are no longer the same country. There may be people, who took part in the election for their president, but we have totally boycotted, and we have decided to restore the sovereignty of our state,” Samuel Sako Ikome, interim president for of the separatist movement, told DW, a German broadcaster.
On October 1, 2017, Anglophones in the Northwest and Southwest regions declared symbolic independence from the French-dominated government. Since then, the secessionists call the English-speaking region Ambazonia. For the elections, separatists say their aim was to disrupt the voting.

Local observers question vote credibility, AU gives it a clean bill
In some places in Buea and Bamenda, polling stations had no single person coming to vote despite calls from the authorities asking residents to go out and exercise their civic duty. An observer for the Center for Research on Democracy and Development in Africa questioned the vote. “I feel so frightened even though I have lived in this conflict area since it started,” he said. Today’s confrontation, he adds, was not a good one. In some areas, the unnamed observer said that the military paraded all over the place on voting day, frightening voters. “If you are asking voters to come and vote – you don’t move around with guns threatening them. No one is going to vote because no one wants to die.”
At the Parliamentarian Flats Hotel – one of the localities in Buea – only one-third of 363 registered voters voted, according to the election officer, who wanted to remain anonymous for his safety.
Many fear vote rigging and results fixing given the very low turnout. “People came to some centres without identification documents and they were allowed to vote because they are security officers,” another observer told The SUN after vote counting had finished in Buea.
Meanwhile, observers for the African Union have already declared that they were satisfied with the manner in which Cameroon’s presidential election was conducted. “We can agree that it went well and we are satisfied,” Kwesi Ahoomey-Zunu, head of the Observer Mission for the AU, was quoted in the press. Despite his satisfaction, his team was not dispatched to the troubled South West and North West because of the crisis.

**The conflict affects all sides**

While crisis has left the town of Buea crippled, residents insist that the military crackdown has been too hard. “Not everybody is part of the [secessionist] movement,” says a 29-year-old human rights researcher living in Buea. “But the impression of the military is that everyone, especially young men in this part of the country, is a secessionist.”
He explains how his two cousins were killed by military personnel. They had visited a village in an effort to ask people to come out of the forest and return to their homes. “I received a call from a friend who went to the town and discovered the corpses,” the researcher says. He himself hasn’t seen his direct family members in months. Many of them fled the towns and villages. “The people used to live here, but they’re now in forests. For the past six months I have not talked to my brothers. I have not spoken to any of my family members. I don’t know their whereabouts. I don’t know if there are still alive or dead.”
On The Election Day – a car transporting journalists was shot at by men believed to be separatists according to security sources. No one was injured. Journalist Leonard Kum says that he and his colleagues have been a target for both the separatists and the government army. “We are not so sure of how we are perceived either by the government or the separatists,” Kum said. “We receive frequent calls from both quarters to warn us on how we are reporting,” he added.
Kum, who also heads the Southwest Chapter of the Cameroon Journalists Trade Union, said the work of his fellow journalists was increasingly becoming almost impossible.
Another reporter said: “We are caught in the middle of the deep sea and a devil. We don’t know where to go, but we shall continue to do our job because without us, our people would be living in the dark.”

**Buea DO ambushed, wounded**

The convoy of the Divisional Officer for Buea, Kouam Wokam Paul was ambushed somewhere in Muea as he readied the stage for elections. His head was light bruised while his two right finders were wounded. After receiving medical attention, he could be spotted later with plastered fingers as he continued work.
The service car of Cameroon Tribune was also attacked by gunmen in Buea.

<https://thesunnewspaper.cm/lockdown-north-west-south-west-polls/>

1. **War in South West, North West: Youths paying the price**

[October 17, 2018](https://thesunnewspaper.cm/war-south-west-north-west-youths-paying-price/)

By Norbert Wasso
The war in the two Anglophone regions of Cameroon referred to by activists as Southern Cameroon or “Ambazonia” continues to rage unabatedly despite calls by national and international bodies for an inclusive dialogue to address the root causes of the problem.
Infact, catholic prelates in Cameroon have termed what is going on as a “senseless war”.
At the start of the last weekend about 10 civilians were reportedly gunned down by soldiers in Ekona, a suburb in Muyuka subdivision and one of the hotbeds of the war. In Mutengene, a raucous junction town in Tiko subdivision, four civilians were gunned down allegedly by soldiers on Sunday, October 14.
Tales of shootings, abductions, arrests by both sides, i.e government forces and separatist fighters in Ekona, Muyuka, Buea, Bolifamba, Kumba, infact in most towns in the North West and South West regions have become legion and are daily happenings.

**Youths dying, fleeing**

In all of this young people are paying a huge price. Since November 2016 when the crisis erupted, the academic calendar of most schools have been seriously perturbed, others especially in the rural areas have shutdown completely.
Before the Ambazonia fighters decided to face government’s heavy artillery, the government had in early 2017 embarked on a manhunt of many activists notably the outlawed Civil Society Consortium that grouped lawyers and many teachers’ syndicates. Some of them such as the president, Barrister Agbor Balla and his secretary general, a university don, Dr. Fontem Neba were arrested, kept in detention and arraigned before a military court in Yaounde before being released almost nine months later.
The same manhunt was unleashed against members of the also outlawed Southern Cameroons National Council, SCNC, a group that has been advocating for the independence of Southern Cameroonians. The targeting of SCNC members predates the current crisis. Due to arbitrary arrests, torture, incommunicado detentions and deaths, it is no longer safe for people to live in their houses. They have all fled their homes and are in hiding. A case in point is that of Ngomeioh Fotabong Anche. On many occasions, he has been illegally arrested, detained, subjected to torture and inhumane prison conditions.

Ngomeioh Fotabong Anche: One of the victims of the ongoing war in SW, NW

Their house in Muyuka like those of many others even the innocent, have been burnt down to ashes. Ngomeioh narrowly escaped from being killed and has since gone missing.

<https://thesunnewspaper.cm/war-south-west-north-west-youths-paying-price/>

1. **Is education still a fundamental human right in Cameroon?**

[October 30, 2018](https://thesunnewspaper.cm/education-still-fundamental-human-right-cameroon/)

For two years now, schools have either been ineffective in some parts of Anglophone Cameroon or in some places, completely paralyzed. The crisis that began when teachers joined lawyers of Anglophone extraction
A UN report says since the crisis escalated in 2016, schools and their staffs have become targets in the North West and South West Regions of the country. 40 schools have been burnt down by separatist fighters and about 33,000 children are said to be out of school. Even the few schools going operational have very little or no learning materials. This has pushed so many young boys and girls to engage in sexual activities for livelihood as so many are either seeking refuge in Nigeria or are internally displaced.

Most educational establishments lie in ruins as conflict rages on in North West, South West

The situation in the English speaking regions has forced most students and pupils to relocate to the francophone regions to seek education, but how effective are they in this situation with a new environment, far from home with challenging financial and psychological conditions
Liza is a lower sixth student in the Douala Academy of arts and sciences, she tells her story from her former school in Muyuka, one of the affected localities in the South West Region
“I left my place and came here because I knew since so many people are running towards this place; it was going to be an advantage for me to gain more knowledge since everywhere in the South west is not safe.”
Liza just like any other child who braved the odds to school last academic year 2017/2018. Liza Talking to a team of researchers from the Children Home International narrates her ordeal fighting to acquire education and sticking closer to her family within a conflict hit area. She thinks she could have done better if she had better study conditions.
‘’ I left my school during when I discovered that schools where not effective, I came to Douala but due to circumstances I can’t explain, I went back to meet my family in Muyuka and there I started reading on my own preparing for the GCE. I actually prepared well but when we started writing the exams….. I wrote just the economics paper and fighting erupted with heavy gunshots that frightened us. We were taken to Buea to complete our GCE at the government secondary school Bokwango. While in Buea, we wrote the exams all on the ground, we couldn’t sit normally to write because we were afraid of gunshots. Even teachers were on the ground. I wrote 10 subjects and finally had five [05], and I believe that if were to write under favorable conditions, I would have had more than that but thank God I succeeded. My biggest challenge now is to face the advanced level in two years from now’’. A report from a local newspaper shows how even in the littoral region, a predominantly French speaking region hosting a good number of Anglophone schools were negatively affected. According to The Post newspaper, school principals complain how they were compelled to admit students who had missed lessons for long weeks/months and rushed to the region to prepare for the GCE exams. The principals during an evaluation meeting revealed how such instructions from the then minister of secondary education Jean Ernest Masena Ngale compelled them to organize catch-up classes to put them at same level with their mates at who have had regular classes within the French speaking regions .This measure according to them was greatly affecting the standard of education offered to students. They claimed their schools had already covered the school syllabus for 2017 adhering to the total number of hours recommended by UNESCO and that classes such as form 5 and upper sixth were simply revising their notes. These remarks seemed to have fallen on deaf ears as both the education ministry and UNESCO ignored the concerns.
Calls for continues school boycott from Anglophone separatists have sparked controversy even within the ranks of their supporter. These same calls have been responsible for the destruction of education in the Anglophobe regions. The United Nations has simply ended at condemning the attacks on school children, teachers and infrastructure but heavily criticized for failing to guarantee a safe environment for children’s education within these two regions. A group of women in the North West and South West Regions of the country have come out to protest against the avoidable war that is killing their children, husbands and preventing their kids from gaining education which is considered their fundamental human right enshrined in both national and international instruments
The disruption of schools in Cameroon is not just in the Anglophone regions of Cameroon. The Far North Region of the country has witnessed similar instances mostly due to the outbreak of the Boko Haram insurgency. This has greatly affected schools as campuses have been turned to camps for refugees and Internally Displaced Persons IDPs.
The crises in Cameroon affecting the lives of school children negatively puts in question the universal declaration of human rights especially article 26 that states ‘’everyone has a right to education’’. What then is the role to be played by UN stake holders in the domains of education in Cameroon.
Children Home International is very concerned about the situation and is proposing a series of measures to mitigate the situation in the English speaking regions of Cameroon. Such measures include organizing seminars during which psychosocial support is channeled to the affected zones and create an enabling environment conducive for studies. These measures intend stretching out to the refugee camps in Nigeria while hoping that UNESCO and other UN systems may appear soon to salvage the situation by calling for urgent dialogue between the parties in the conflict
By Solomon Ateh, freelance writer, student journalist and blogger

<https://thesunnewspaper.cm/education-still-fundamental-human-right-cameroon/>

1. **SCNC activist, Georgina Akuandou Njenwei feared dead**

[March 18, 2019](https://thesunnewspaper.cm/scnc-activist-georgina-akuandou-njenwei-feared-dead/)

By Jonas Lima
A vocal and committed member of the Southern Cameroons National Council (SCNC), Georgina Akuandou Njenwei has not been seen in public for quite some time now. The third year PhD student at the University of Buea’s Department of Educational Psychology was also working with a private school in Douala.
Due to her activism in the outlawed SCNC, where she is an ardent member and supporter, she was always in trouble with the government forces. In the past years, she has suffered many arrests, imprisonment and torture for daring to fight for the restoration of the statehood of Southern Cameroons – a geographical representation of Cameroon’s North West and South West Regions. She had always been spotted enlightening Southern Cameroonians of their birth rights and distributing tracts or flyers to promote the struggle.
Her safety became an issue of great concern particularly during the government crackdown on peaceful demonstrators in the wake of the current crisis in the English-speaking regions of Cameroon which started late 2016 and has since morphed into an armed confrontation between the government forces and some armed Southern Cameroonian independence fighters.
Akuandou Njenwei is reported to have been arrested in December 2017 by government security men while on her way back from work in Douala, tortured and detained at the Buea prison. She was released under unexplained circumstances without charge two weeks later, we learnt.

According to family sources, things appeared to be normal for her until she travelled to the United States of America for work in April 2018. On her return, the Cameroon government suspected her of having gone to the United States to champion the SCNC course for the independence of Southern Cameroons.
In May 2018, armed government soldiers stormed her residence in Muyuka and arrested her and her brother – suspecting him of being a separatist fighter otherwise known as “Amba boys”. They were detained at the Buea prison. She has not been seen in public since then. Family sources allege that Akuandou Njenwei was tortured and raped in detention by the government soldiers to near death, an allegation which the SUN has not independently verified. Sensing her fast deteriorating health condition, she was stealthily released. The family rushed her to the hospital where she recovered and has since been on the run for fear of being targeted.
The government crackdown on Anglophone activists has since intensified with arbitrary arrests, detention, torture and extra-judicial killings becoming the new normal.
The fate of many remains precarious as security forces battle separatists. President Paul Biya has since taken a tough position on the crisis in the two-English speaking regions. Guns have since taken the place of dialogue and peace.

<https://thesunnewspaper.cm/scnc-activist-georgina-akuandou-njenwei-feared-dead/>

1. **IDPs living in a sorry situation**

[March 28, 2019](https://thesunnewspaper.cm/idps-living-sorry-situation/)

By Atia Tilarious Azohnwi
In the weeks to the build up to Cameroon’s presidential elections last October, many locals of the North West and South West regions in the peripheries had to flee as it was perceived violence between Non-State Armed Groups and State Forces would soar.
This group of Internally Displaced Persons (IDPs) in Sodiko a neighbourhood in Bonaberi Douala saw that it was time to leave their homes in Mile 16 Buea and other places they considered unsafe.
They escaped from their homes together with their children, carrying along with them small bags of clothes, abandoning the life they knew behind to the safety of the country’s economic capital.
“The situation had reached alarming proportions and we could not stay back despite our love for home,” Mami Glory Ayuk says from this uncompleted building in Sodiko.

“We got to Douala stranded and were lucky to find this uncompleted building with its owner generous enough to let us have two rooms. All males, 13 of them, sleep in one room while we the women sleep in this other room. We ease ourselves in this stagnant water behind here and we survive on the benevolence of people of good will,” Flora Malah, a career seamstress says.
She says they just met at the location and have been forced to bond together to face their challenges. In all, 27 of them live in this small location, having to spread cloths on the roughly cemented floor to sleep.
“We go for days without eating. Sometimes, the boys have to go out and do odd jobs so we can survive. I am a seamstress but I could not take any of my tools along with me as I ran to safety,” Malah furthers.
She is however thankful that Fred Muvunyi, Africa editor at Deutche Welle bought her two sewing machines recently. Muvunyi had in October 2018 visited the new home of these IDPs and decided to help them a few weeks later.
They have since had support from persons like Salatiel, Agbor Balla and other people of goodwill.
Mami Ayuk Glory, Flora Malah and the 25 others putting up with them in this swampy Sodiko neighbourhood of Bonaberi Douala are some of over 30,000 Cameroonians from the English-speaking North West and South West regions of the country who now live in a sorry situation. The children are unable to get education given that food and shelter have become more important than anything else.
Discrepancies between the French and English academics, legal and administrative systems which have always existed concurrently, as well as cries of political and economic marginalisation, crystallised into a series of protests and riots in 2016.
That soon turned bloody as the government, in a bid to quell dissent, first ordered a three-month internet shutdown and deployed soldiers.
In January, separatists including Julius Tabe, the leader of the interim government of “Ambazonia” – the self-declared state consisting of the Anglophone regions – were arrested in Abuja, the Nigerian capital, on charges of terrorism.
Back in Cameroon, young untrained fighters are embroiled in a battle with government soldiers, countering sophisticated weaponry with homemade guns, machetes and charms called “odeshi” to make them invisible and invincible.
Trapped in the middle of all this are the estimated six million Anglophone Cameroonians who form roughly one-fifth of the population.
Local groups say the number of people displaced from both regions has doubled to around 200,000 people over the last month and there are about 50,000 refugees in Nigeria.
The International Crisis Group, which says the international reaction has been muted, estimates that at least 2,000 people have died in the conflict, with another 170,000 displaced.
An unknown number of people are also sleeping in open forests in the absence of formal camps. There is a shortage of toilets and proper hygienic conditions for menstruating girls and women in the informal host communities.
Beyond the detentions and displacements, there are concerns about the lingering trauma that could significantly hamper the healing and reintegration process for survivors.
Widows who have lost their spouses to flying bullets, children separated from their parents and citizens who have lost their incomes could have no life to return to.
But for Ayuk and Malah, they can’t wait to come back to the place they call home. They look up to the stakeholders in the on-going conflict to give peace a chance.
“We just want to go back to our normal lives. We want to be able to fend for ourselves and our families. We need to give our children a better life. I pray that this thing will end soonest,” Malah says with a heavy heart.

<https://thesunnewspaper.cm/idps-living-sorry-situation/>

1. **SCNC detainees, others jump jail in broad daylight**

[April 1, 2019](https://thesunnewspaper.cm/scnc-detainees-others-jump-jail-broad-daylight/)

By TALLA AGHAA CHRISTOPHER

About 11 detainees at the Old Town Police Station in Bamenda had been taken out to wash some military trucks under the guard of two gun-toting officers.
Shortly after, some security officers drove in with a truckload of suspects arrested following a security raid in Ntarinkon. As those freshly arrested were being led down the vehicle to their cell, some of them tried to escape and in the confusion, the detainees who were washing the trucks also fled.
A security source said among the escapees are some members of the outlawed Southern Cameroons National Council, SCNC, a secessionist grouping that seeks a review of the terms of the independence of the British Southern Cameroons in 1961. The SCNC was banned on January 17, 2017 by the then Minister of Territorial Administration and Decentralisation, Rene Emmanuel Sadi.
The order banning the SCNC also banned the Cameroon Anglophone Civil Society Consortium that was led at the time by Barrister Nkongho Felix Agbor Balla and Dr. Fontem Aforteka’a Neba.
The about six SCNC sympathisers were arrested on March 20, 2019 as they held a meeting in Bamenda. The meeting, security forces say, Swas to plan a protest against ongoing human rights violations that have characterised the crisis in Cameroon’s North West and South West Regions.
The SCNC activists arrested that fateful Wednesday included: Mohammed Sunusi Danjuma born on August 17, 1988 in Bamenda, Anye Piceva Achu born on January 11, 1982, Ngala Edward, Jephter Akum, Ayuk Nkongho and Babila Elvis.

After the escape, police are said to have raided the family home of Mohammed Sunusi Danjuma, traumatising his parents Ibrahim Danjuma and Madam Cheo Martha.
The family homes of
Anye Piceva Achu and Edward Ngala were also raided.
The whereabouts of the escapees remains in doubts as security forces step up their search. If caught, the SCNC suspects will be tried under the dreaded 2014 law on the suppression of acts of terrorism. They may be given the maximum sentence.

<https://thesunnewspaper.cm/scnc-detainees-others-jump-jail-broad-daylight/>

1. **Heads to roll in Buea as suspected Ambazonia activist jumps jail under unclear circumstances**

[April 27, 2019](https://thesunnewspaper.cm/heads-roll-buea-suspected-ambazonia-activist-jumps-jail-unclear-circumstances/)

- ***Five officers allegedly arrested as investigations intensify***

*By Jonas Lima*

Heads may roll within the ranks of security forces in Buea following investigations into the circumstances that led to the disappearance of a suspected Anglophone activist who was being held in detention.

A top security source who pleaded for anonymity for fear of reprisals told The SUN that a certain Akumengwa Neba Ntohnwi jumped detention Thursday, April 25, 2019 hours before he was to be sent to Yaounde.

“Some of the officers who were on duty have been put behind bars. Investigations have been opened. The high command is embarrassed at what happened and has given firm instructions as to how business will be conducted henceforth,” our source said.

The commander of the gendarmerie brigade where the suspect was detained is said to have been grilled by judicial police officers, given that a prison break is not likely to have taken place. Allegations are rife that the escape must have been an inside plot.

Akumengwa Neba Ntohnwi was dozens arrested by security forces following routine raids within the city of Buea to fish out suspected separatists believed to have infiltrated the area. We learnt soldiers were in the chase for separatist fighters who have since been fighting to restore a self-proclaimed state of Ambazonia, the territorial space of Cameroon’s English-speaking North West and South West Regions.

According to reliable information, the said Akumengwa Neba Ntohnwi was arrested on Friday, April 19, 2019 at the Mile 16 checkpoint. Sources at the judicial police say the suspect is a nurse who is believed to have been treating local fighters seeking a breakaway state.

Though our source said the evidence linking Akumengwa Neba Ntohnwi to the Ambazonia revolution remains sketchy, he said assorted information concerning the activities of the outlawed group were found in his phone and gadgets.

After the escape, locals say security forces masked and forced their way into homes, hostels and rooms in two targeted locations in Buea, dragging and beating their occupants.

Those arrested were transported in trucks to the gendarmerie legion, eyewitnesses said. It is not known the number of persons who were arrested, but judicial sources say they were being investigated for involvement in the separatist movement that has since turned into a militia. The escapee Akumengwa Neba Ntohnwi was unfortunately not among those recently taken into custody, a security source regretted.

Political tensions over cultural rights and identity have been growing in Cameroon’s Anglophone regions since 2016 when English-speaking lawyers, students and teachers began protesting against their under-representation and cultural marginalization by the Francophone-dominated government. Violent repression by the security forces resulted in arbitrary arrests, sexual violence, and the killing of several protesters.

Anglophone and Francophone Cameroon were unified in 1961, but there have been long-term disputes over the extent to which government resources and access to employment have been controlled by the French-speaking majority. Although the Anglophone minority constitutes 20 percent of the population of Cameroon, they are concentrated in the Northwest and Southwest regions. President Paul Biya has held power in Cameroon since 1982.

The recent crisis in Cameroon deepened after Anglophone separatists organized large-scale protests from 22 September to 1 October 2017 and symbolically proclaimed independence, establishing a state of “Ambazonia.” During the protests security forces responded with disproportionate and deadly force, leading to at least 40 deaths. Since then, violence between security forces and armed separatists has escalated. Government forces have arbitrarily arrested and tortured detainees, and destroyed a number of villages in the Anglophone regions.

Separatist forces have also killed at least 300 military personnel and attacked teachers for not participating in a separatist boycott. At least 40 schools in the Anglophone region have been burned down. Some armed separatist groups have kidnapped state officials and sought to make the Anglophone areas “ungovernable.” According to the UN, more than 500,000 people have fled their homes as a result of the ongoing violence with more than 50,000 others seeking refuge out of Cameroon.

<https://thesunnewspaper.cm/heads-roll-buea-suspected-ambazonia-activist-jumps-jail-unclear-circumstances/>

1. **UNSC: Member countries declare stand on Cameroon’s armed conflict**

[May 16, 2019](https://thesunnewspaper.cm/unsc-member-countries-declare-stand-cameroons-armed-conflict/)

By Noela Ebob Bisong
Representatives of member countries of the United Nations Security Council have made their positions known with regards to the ongoing armed conflict in Cameroon, following the informal discussions held on the deteriorating humanitarian conditions of the country’s population in the two restive Anglophone regions of the country, on Monday May 13. Due to the fact that the UNSC meeting on Cameroon was an informal one, no binding resolutions were outlined at the end of it.
However, following the disturbing reports from the testimonies of Omam Esther Njomo, Executive Director of Reach out Cameroon as well as others, the representatives of the UNSC member states have been able to judge for themselves what is, and what has to be done to salvage the situation.
France, former colonial master of Cameroon says investigations should be carried out and the culprits be brought to justice without exception. It also holds that humanitarian assistance should be stepped up, and that the Cameroon government should launch inclusive dialogue and parties halt violence and respect the rule of law. France however endorses the ongoing Prime Minister’s efforts and suggestions to seek and restore peace in the two troubled regions of Cameroon.
Belgium, like France, would like actors of atrocities to be investigated and brought to justice, and it holds they are ready to support dialogue between Government and armed separatists. Belgium also says it would provide their experience in federalism to any form of decentralization solutions.
Kuwait, on its part, has endorsed that national reconciliation and Humanitarian assistance takes place in Cameroon.
The United Kingdom says they stand with decentralization, a position said to be held also by the United States.
Poland calls for all the parties on the ground to come together for inclusive dialogue, says full humanitarian access is important and maintains that there is no peace without justice, thus stating that all involved in atrocities must be brought to justice.
Cameroon’s neighbour Equatorial Guinea, supports inclusive dialogue as a means to end the conflict with both sides ready to make compromise.
Germany holds there is need to look at the root causes of the crisis, while China, Cameroon’s bilateral partner holds that the International community should not interfere with Cameroon’s internal problems, as Cameroon is capable of handling the threats it is currently facing.
Russia, another partner of Cameroon corroborates the China position to reiterate that the International community should not interfere with the internal affairs of Cameroon, stating that the African Union and other organizations within the continent should handle the issue. As a matter of fact, Russia pledges to assist its partner Cameroon, should the latter request.

<https://thesunnewspaper.cm/unsc-member-countries-declare-stand-cameroons-armed-conflict/>

1. **Kumba denizens decry poor state of roads**

[June 4, 2019](https://thesunnewspaper.cm/kumba-denizens-decry-poor-state-roads/)

By TALLA AGHAA CHRISTOPHER
Kumba is the Chief Town of Meme Division with a City Council headed by Victor Nkele Ngoh since 2009 as Government Delegate, and three Sub Divisional Councils, Kumba I, II and III headed by Mayors Ebako Abel Ndoh, Ndobegang Forcha Martin and John Kona Makia respectively.
Considered as the economic capital of the South West Region linking Ndian, Kupe-Muanenguba and Manyu Divisions, the town is just an eyesore, as the state of roads remains in deplorable conditions. This has caused the inhabitants of the city to raise eyebrows and point accusing fingers at municipal authorities, for being the hidden hands behind the deplorable conditions of the roads and streets due to their lack of developmental foresight.
A cursory look of the various streets in Kumba, makes it difficult to conclude that one is at the economic capital of the South West Region. A denizen and motorcycle (aka okada) rider who ply the Mbonge road to Mile I park stretch of the road disclosed to The SUN Newspaper that it is rather unfortunate he is obliged to increase his transport fare from FCFA 150 to FCFA 250, because of the poor state of the road. He pointed out that, the PHS Kumba area of the road is impracticable and he has no choice than to increase the fare just to help the denizens living in that area. This same version was corroborated by many other motorcycle riders plying the same road.
The road leading to the Meme High Court is another headache. From the popular ‘Tarven junction’ to the Meme High Court which used to cost just FCFA 100 now costs FCFA 200. The potholes are unbearable to manage by the population.
Other streets like Endeley and Cameroon Street in Kumba II Sub Division, and a host of others are just a talking point across the city.
The population has been questioning where the FCFA 27 million handed to the various councils in the country yearly as part of Public Investment Projects including Kumba Councils by the Ministry of Public Works for the maintenance of Sub Divisional roads in the their various municipalities go to.
However, The SUN visited some of the streets in the various council areas and concluded that most of the streets have at least been visited by council’s bulldozers and caterpillars.
Nonetheless, authorities of the Kumba City Council, in their past Council session have maintained that the Green City would have been an Eldorado if not because of the current crisis rocking the two Anglophone Regions. Projects such as the road maintenance of Bonakama Road, CPDM hall, SDO‘s residence, have been cancelled, the FCFA 5billion World Bank road project to handle the Bamileke street-Kossala-Metta Quarters-Hausa Quarters have been suspended whereas the road from St John’s Catholic Church-Kake II Village including Daniel Street, Hospital Road, Lawyer Enaw Street, Mote carlo Street Sustainer, GBHS Kumba Road through Bongwana Street has been indefinitely suspended, the Kumba City Council authorities maintained, but hoped that with the recent peace crusading mission in the restive regions by Prime Minister Head of Government, Chief Dr. Joseph Dion Ngute, the projects will soon see the light of day and Kumba will be transformed as planned.

<https://thesunnewspaper.cm/kumba-denizens-decry-poor-state-roads/>

1. **Buea: MINAT boss inaugurates Humanitarian Assistance Centre for IDP’s**

[June 12, 2019](https://thesunnewspaper.cm/buea-minat-boss-inaugurates-humanitarian-assistance-centre-idps/)

By Ikome Christie-Noella Eposi
The Minister of Territorial Administration (MINAT), Paul Atanga Nji has inaugurated the new South West branch of the centre for the coordination of emergency humanitarian assistance in Buea. This took place on Wednesday, June 5, 2019. While launching the centre, Minister Paul Atanga Nji said it was an opportunity to better coordinate humanitarian aid with all partners involved.
The centre is responsible for coordinating all actions related to providing assistance to victims of the crisis in the North West and South West regions, especially internally displaced persons, the injured, lame, handicap, orphans, victims of destruction of property, host communities, Cameroonian refugees and ensuring a synergy of actions by the various stakeholders identified at the central and regional level, organisation of meetings and coordinating the activities on the field.
The government of Cameroon since the launch of the emergency humanitarian assistance plan in the North West and South West regions has donated assorted goods to internally displaced persons in the North West and South West regions as well as those out of the two regions.

“The Cameroon government since the creation of the emergency humanitarian relief commission has distributed aid to at least one hundred and four thousand internally displaced persons of the one hundred and fifty two thousand registered internally displaced persons in the country”, MINAT boss revealed.
Nonetheless, it should be noted that the efforts to provide humanitarian assistance has not solely been that of the government. Many non-governmental organisations, including Churches and foreign bodies have also in one way or another provided material, financial, spiritual and moral support to some IDP’s affected by the on-going crisis in the two Anglophone regions of Cameroon.
The number of internally displaced person is however disputed by many local as well as international non-governmental organisations that put the numbers at over half a million.
Explaining the importance of the coordination centre for the humanitarian activities, Minister Paul Atanga Nji said the centre will help local and foreign partners offering humanitarian activities to displaced Cameroonians better coordinate with the government and also to work within laid down rules.
He called on NGOs to be independent, yet transparent with their activities while working closely with administrative officials. “Those local NGOs working with foreign partners must go and register so the government can know exactly who they are and who they are representing both at the level of the region, division, and sub division”, the Minister said.
The Minister also highlighted the fact that every day many separatist fighters lay down their weapons, as can be seen in the calm that is gradually returning to the once vibrant South West region.
The centre for the coordination of emergency humanitarian assistance in the North West and South West regions will be guided by the Minister of Territorial Administration, closely followed by other ministries including; ministry of external relations, defence, public health, agriculture, livestock fisheries and animal husbandry, communication, secondary education, basic education, social affairs, women empowerment and the family, secretary of state in-charge of defence, general delegation of national security and the directorate for external research.
The coordination centres will be run by personnel of the civil protection from the ministry of territorial administration, civil administrators, and forces of law and order who would guide non-governmental organisations involved in helping internally displaced persons so that they can carry out their activities safely.

<https://thesunnewspaper.cm/buea-minat-boss-inaugurates-humanitarian-assistance-centre-idps/>

1. **SNWOT gives reasons for effective school resumption come Sept**

[July 16, 2019](https://thesunnewspaper.cm/snwot-gives-reasons-effective-school-resumption-come-sept/)

The South West and North West Women Task Force have joined the general call for effective resumption of school in the two Anglophone troubled regions of Cameroon.
According to a release issued by the president, Omam Esther Njomo, a copy of which The SUN procured, all stakeholders must assume their responsibilities and uplift the ban on education in the North West and South West regions.
The release states that: “We, the Mothers, Sisters and Aunties; call on all key stakeholders to assume their responsibilities accordingly and uplift the ban on education and caution their fighters to stop attacking academic institutions, teachers, as well as students and to evacuate school premises, free all students trapped in prison cells and camps and speed up the reconstruction and rehabilitation of schools affected by the crisis; and ensure the security of pupils and students by ending hostilities and providing enabling conditions for safe schools.”

SNWOT gives reasons for effective school resumption come Sept

The release further outlines six reasons why schools should resume come September 2019 in the NW/SW Regions of Cameroon as follows:
The first is to respect and uphold the fundamental rights of children to education and protection.
Secondly, they opined that, three years of no schools have been an enormous sacrifice and the damage cannot be over emphasized. In the third instancce, preventing children from further marginalization for want of education is enough reason for them to stay in classes. The task force believes that children are being exposed to all kinds of malpractices including drug abuse, sexual exploitation, trafficking, child marriage, early pregnancy, and the accompanying trauma and long-lasting emotional distress that these experiences bring. The crisis, according to the release, is human-centered and that it is for a better future for the children and education is the only guarantee for their future. Finally, they reveal that without school resumption, the North West and South West regions will be missing out in the achievement of SDG 4 on education and related commitments.

<https://thesunnewspaper.cm/snwot-gives-reasons-effective-school-resumption-come-sept/>

1. **Mancho Bibixy, Ngalim Felix campaigning from Prison**

[July 16, 2019](https://thesunnewspaper.cm/mancho-bibixy-ngalim-felix-campaigning-prison/)

On June 20th, 2019, inside the walls of their prison cell at the Kondengui prison in Yaounde, Mancho Bibixy Tse and Ngalim Felix SaFeh, detained activists of the Coffin Revolution that brought the ‘Anglophone Problem’ to the limelight back in 2016, jointly signed a letter, declaring their stance ahead of the upcoming school year in Anglophone Cameroon. The Coffin Revolution, said to be an arm of the Anglo-Saxon Youth Higher Council with purpose to defend the poor, fight for youth employment, defend the Anglo-Saxon subsystem of education, fight for the improvement of living conditions, good governance amongst others etc.

In the letter, they inform the public, National and International Community, that they are for schools to reopen, come September 2019. The letter details that they are declaring their stance, after having consulted and deliberated with all sections of the Anglo-Saxon Youth Higher Council.
“We therefore are calling on all parents in the two Anglophone regions to send their children back to school in September. We are appealing to all political, religious and traditional authorities, development associations, Parent Teacher Associations, civil society organizations and Human rights groups to join us in sensitizing our parents, children, teachers and all those involved in the education of our children for a total resumption of schools in September 2019. We call on all international bodies including the United Nations Organization, UNICEF, and UNESCO, PLAN INTERNATIONAL etc to support our initiative and bear witness to the fact that our movement is TOTALLY against the abuse of the Right to education of Anglophone children”, they write.

Insisting that their revolution was never meant to bring conflict, untold misery and suffering, make children illiterates, bring chaos, disorder lawlessness kidnaps and demands for ransom etc, the activists remind: “We were fighting for a better society with better living conditions for the common man…we believe that the way to lift our society out of poverty is through education. Unfortunately our genuine fight was hijacked and the education of our children, especially the children of the poor, for the past three years has been destroyed”.

To them, “Having our children out of school for three years is a PRICE too heavy for us to pay. Therefore, we have resolved to call for school resumption in September 2019 and to do all to ensure smooth resumption while the political demands are being looked into”.
They maintain their initiative has no external influence, but is solely a move clearly thought about and taken by the Coffin Revolution activists, a decision based on their consciences and on the fact that education is a fundamental Human right: “Even if we are in prison, we are also parents, teachers, sponsors etc and will want a good future for our children. We feel the pain of the injuries our children, especially those of the poor are going through”.
Their reasons for wanting schools to resume in Cameroon’s restive North West and South West, they advance, are because education is a fundamental human right, a means to fight injustice and inequality, catalyst for development and the fact that rich parents have sent their children to schools out of the two troubled regions and even out of the country, and that schools continue to function normally in some areas within the two regions, among others.
They outline the consequences of continuous school boycott as including situations like unwanted pregnancies, drug addiction, sexually transmitted diseases, premature deaths, crime wave, illiteracy, lawlessness, stagnation, child labour and a generally bleak future etc. “We appeal to all our followers and sympathizers to join this initiative and mobilize our people to send their children to school. It is an important decision that we must take now or be judged by history”.

While noting possible questions which will follow their position on school resumption in the North West and South West regions, they go further to provide certain answers to such questions, for example the possible and obvious question of ‘What has changed since the protest started in 2016 till now that we want to go back to school?’ To this, they elaborate that “The changes have been both negative and positive. The negative changes are so pronounced more than the positive changes because of school shutdown. We risk losing even the little we had if schools fail to go on. We were demanding for an improvement in our education system. Today the entire system is collapsing because of school boycott. We cannot sit and watch it happen. We must hold onto what we have already before fighting for improvement. Again, the cost of a complete shutdown while waiting for improvement is too much of a Price to pay. The years our children have lost can never be recovered. Abandoned school infrastructure will go completely out of use. We will have to start all over in the future. Therefore, it cannot be later than now for schools to resume. Moreover, some of the demands tabled by teachers’ trade unions were accepted and solutions provided. Some solutions were provided immediately and others were to follow. Because schools have been closed, the population cannot be able to see the changes. If schools were going on, all of us will know if the government is serious or not. With schools not going on, we cannot be able to determine government’s seriousness. The government accepted to look into all demands tabled by teachers’ trade unions. The area of disagreement was on the form of state, which is a political issue, and having nothing to do with academics. So we should allow innocent children to go back to school while the political demands are being looked into”.
On another possible question of whether they regret their action back in 2016 now that things are the way they are, they answer that “There is no regret. Even while in prison we have no regrets because the message we wanted to send to the government and the international community was successfully passed”.
In conclusion, the Coffin Revolution activists emphasize that “The Coffin Revolution is not the cause of the current crisis. Our peaceful course was hijacked and we are suffering the consequences”.

<https://thesunnewspaper.cm/mancho-bibixy-ngalim-felix-campaigning-prison/>

1. **25th edition of World Teachers Day: teachers urged to shun fear**

[October 8, 2019](https://thesunnewspaper.cm/25th-edition-world-teachers-day-teachers-urged-shun-fear/)

By IKOME CHRISTIE-NOELLA EPOSI
Under the theme, ‘Young Teachers: The future of the profession’, teachers all over the world on October 5, 2019, celebrated the 25th edition of the World Teachers day. In Buea, South West region of Cameroon, teachers were encouraged to shun fear and be courageous in the practice of their noble profession.
The day comes at a critical point in Cameroon’s history with the country facing upheavals in the Anglophone Regions. The over three-year crisis has seen teachers beaten, maimed, kidnapped, and others killed simply for practicing their profession.
The Regional Delegate of Secondary Education, Dr. Hannah Mbua Etonde, during the ceremony urged the teachers to shun fears and be courageous, considerate, and daring, knowing that if they stay away from classes, they are killing generations. “Let us take measures that will see teachers work in a calm atmosphere. At this point in time, teachers need to be credible and courageous while adapting to the changes to the profession, taking into consideration technological advancement.”
She furthered that “There is a good number of challenges that the teachers are going through in the South West Region. No matter the challenges, let us remain teachers…Teachers should shun the unwilling attitude to teach students.”
The upheavals have equally had a devastating effect on educational establishments in the Anglophone regions. Many schools have been destroyed as the teachers have been chased away by separatist fighters. Speaking on this issue, the Regional Delegate called on the teachers and proprietors of such establishments or those that are not functional to apply for redeployment, so they could be posted to areas that are operational.
To Esunge Ndive, President of the Buea Area Teachers’ Association, BATA, “The very unfriendly environment where we are working today, due to the sociopolitical upheavals plaguing the Anglophone regions where teachers are kidnapped or killed is evocative. It is an environment where teachers are afraid to go to work due to fear of the unknown.”
He went further to outline some issues that are plaguing the teaching profession such as the non-award of academic honours and medals to the teachers of the Basic Education sector, very low salaries, especially for teachers in the private sector which cannot even pay their house rents, non-registration of teachers of the private sector for pension schemes, and no signing of labour contracts for teachers in the private sector with their employees — this leaving them at the mercy of such employers.
The Secretary General at the South West governor’s office appreciated the teachers for having turned out to celebrate the day despite various threats at their safety. He went on to call on teachers to be the ambassadors of their generation, to preach by example and to serve as a model for the youths.
Another issue that was greatly frowned upon was the slackness new teachers have about their profession. According to officials, many present day teachers are only in search of the matricule number and not having the teacher spirit.

<https://thesunnewspaper.cm/25th-edition-world-teachers-day-teachers-urged-shun-fear/>

1. **‘Coffin Revolutionarist’ resolute on schooling in NW, SW**

[August 30, 2019](https://thesunnewspaper.cm/coffin-revolutionarist-resolute-schooling-nw-sw/)

By NOELA EBOB BISONG
Mancho Bibixy and Ngalim Felix, proponents of the ‘Coffin Revolution’, have recently made public what they term ‘DECLARATION BY LEADERS OF THE COFFIN REVOLUTION’, where they once more make clear their take on school resumption in the North West and South West regions of Cameroon, and have gone ahead to appeal to the consciences of other stakeholders to ensure school children in the two regions are not again deprived of one of their fundamental rights, the right to education.
While still in detention, the duo has remained resolute in their resolve to see that schooling resumes in the two regions.
In the declaration, they begin by telling of what transpired at the Kondengui prison last July 22, which will see them taken out of the prison for at least two weeks before being brought back, as proceedings continue.
“It all started from a peaceful protest by Anglophone Detainees who, conscious of the back to school campaign were calling for their release as they too have to take part in the school resumption exercise. Amongst them are students, teachers and parents. Unfortunately, the protest was infiltrated by inmates with other accumulated grievances and it resulted to looting and destruction.”

Mancho and Ngalim however state: “This does not affect our desire to pressure all stakeholders to do the right thing for schools to resume. We call on the various stakeholders to play their various roles with undivided attention”, as they address five main groups as follows:
-The government of Cameroun: While everyone is for school resumption, there is a wide range of concerns raised regarding security. WE HAD EARLIER RAISED THESE CONCERNS IN NUMEROUS CORRESPONDENCES to the government dating back to 2018. We also wrote to several International bodies pleading with them to assist the government or pressure her to do the right thing. Needless mentioning the measures here since they are lying on government’s tables and clearly spelt out. We again remind the government that Anglophones cannot be taught the importance of education. Before the war, our poor parents could go without food just to educate their children.
-Parents: we do not doubt the desire of parents to send their children to school. Educating children is the pride of every Anglophone parent. We call on you all to stand up like one man and fight for the future of your children. Don’t forget that education is the best inheritance for your children.
-Students/Pupils: You are the main victims of the school boycott. It is your future that is being destroyed as other kids have moved to safer areas to study. Your right to education is a basic human right. You must not let anyone take it from you. Learn from the examples of other countries who made this mistake. Don’t repeat the errors of other countries.
-International Organizations: This is the time you are needed most. You played an important role during peace time to ensure the education of youths. You assisted in building and equipping schools during peace time. You can provide temporary Premises (tents) where schools have been destroyed. You run school in conflict zones and war ravage countries. Our case should not be an exception.
-Religious Authorities: Before the crisis, you played a vital role in education as you operated the best educational establishments. The shutdown of school is a great set back to the society you have toiled for decades to build. The teachers and other staff have been out of work which affects entire families. The once morally upright youths you produced are now an exact opposite. All these values can only come back if you take your responsibility and fight for an effective school resumption in safety.
“Conclusively, let it be known that the coffin revolution and Anglophones in general are not against school resumption. The last days of August and the early days of September 2019 are very crucial. The entire world is watching at the government of Cameroon. We remain hopeful that the government will listen and do the right thing. It cannot be later than now”, they say.

<https://thesunnewspaper.cm/coffin-revolutionarist-resolute-schooling-nw-sw/>

1. **Post Dialogue Caravan in NW, SW: Gov’t picks prelates to unlock deadlock**

[November 20, 2019](https://thesunnewspaper.cm/post-dialogue-caravan-nw-sw-govt-picks-prelates-unlock-deadlock/)

By NOELA E. BISONG, IKOME C. EPOSI, EBONG WILSON & SAH T. ANIMBOM
As efforts continue for peace to return in Cameroon’s restive North West and South West regions, the church has been put at the centre, to create a blissful atmosphere in the two regions, by convincingly selling the recommendations of the Major National Dialogue to inhabitants of the two regions. Two teams, designed by the office of the Prime Minister, Dion Ngute have been sent to each of the regions for a mission described by some as possible, but by others as impossible. The teams are headed by Bishop Nkea Andrew of the Mamfe Diocese (for South West) and His Eminence Christian Cardinal Tumi, (North West). The teams met together with the delegation from the PM’s office, elite and other key stakeholders of the regions simultaneously on Saturday, November 16, 2019 in Buea and Bamenda to lay the ground work for the mission. While the Special Status is prominent in the mission, but its content not yet uncovered by even those to sell it, many have described the Tumi/Nkea mission as an uphill task.

**All we need is peace and for life to return to normalcy – Bishop Nkea**

His Lordship Andrew Nkea, Bishop of the Mamfe Diocese has reiterated the need for peace to return to the two English speaking regions while indicating that the people are tired and just want to live their normal lives as before. He was speaking during the launch of the Regional Post Dialogue Sensitisation Caravan at the Buea Council chamber.
He said, “Whatever politics is involved, we want our children to go back to school without us trembling. Our economy is in bad state, many IDPs everywhere. For how long can we continue? We are tired. Violence breads violence and we need to sit and discuss problems we are facing and look for solutions to them.”
The Bishop equally called on the delegates to strive for collective and not personal success. “The caravan should not be politicised. We should forget about our political leanings, churches or social groups. We should use inclusive and not exclusive language…In one way or the other, all of us have contributed to the crisis. We should not judge or apportion blame to people when we go to the field. It is a collective effort and everybody must join in seeking solution to the crisis. We need peace.”
Speaking to the media, Bishop Andrew Nkea said, “We cannot solve the crisis that has been going on for three years in one day. We are reaching out to the solution of the problem and I think that is the most important for the people to understand what we discussed in Yaounde towards the solution to the crisis. We went to the dialogue from different Divisions yet the discussions from the dialogue have not reached the grass root population. We are sending out the divisional caravan to go out to the various divisions and subdivisions to explain to the people what was discussed and the expectations.” While noting that the content of the Special Status is yet to be unravelled, the Bishop simply said it means people from the North West and South West shall henceforth be treated special.
On his part, Governor Bernard Okalia Bilai reiterated the need for everyone to join the train, and join hands together in educating those in the bushes to come out and share in the message of peace.
The Regional caravan which has been launched is expected to hit the ground running in educating the population about the substance of the National Dialogue and to look for solutions to the present crisis. The report from the various delegations to the six divisions is expected to be harmonised, with the final report to be presented to Prime Minister, Head of Government Chief Dr. Dion Ngute by November 27, 2019.
The present caravan is in its informative phase and the next step that is expected within the coming weeks is the implementation phase.
Six commissions were created representing the six divisions of the South West region. Yet another issue which raised fingers for questioning was ‘how do people take seven days to solve a crisis raging on for three years counting?’ To this, Bishop Nkea made it clear that the seven days were for the beginning to an end to the crisis and not an end in itself.
The caravan comprised the Governor of the South West region Bernard Okalia Bilai, the deputy speaker of the lower house of assembly, Honorable Emilia Lifaka, Benjamin Itoe, the director of civil cabinet at the prime ministry, Confiance Ebune, former minister of forestry Philip Ngwese, the clergy, traditional leaders, frontline Anglophone activist Barrister Agbor Nkongho and other elite of the region.

**What new thing shall we take to divisions? Delegates ask at NW Peace Caravan meeting**

The post Major National Dialogue Peace Caravan at the conference hall of the regional delegation of the ministry of the economy, planning and regional development in the North West on Saturday November 16, 2019, was chaired by His Eminence Christian Cardinal Tumi, in the presence of North West Governor and representative from the PM’s office. Elite of the North West Region based in Yaounde, Douala and elsewhere listened to the raporteur from the PM’s Office disclose the content of the resolutions arrived at during the Major National Dialogue as well as the agenda for peace envisaged by the Post MND Peace Caravan.
Some selected delegates, 10 from each division of the North West will in the days ahead embark on trips to their divisions of origin, which are all affected by surges of violence to preach peace to their respective populations.
According to the PM’s office, they are to have meetings with their people in their respective divisions and report back to the regional delegations for onward transmission to the PM’s office.
Attended by members of the civil society, religious and political leaders, participants listened to the resolutions keenly, hoping to hear something new that can act as a catalyst to the peace message.
The Arch Bishop of the Bamenda Arch Diocese His Grace Cornelius Fontem Esua reiterated the words of Cardinal Tumi who said truth and justice are the prerequisites for peace but regretted that there is so far no truth as such. “The national dialogue should have been a moment of truth but one point which is very fundamental and did not come out very clearly is the fact that there can be no peace without justice. If we cannot accept the truth and do what is right, meeting the greatest aspirations of the people as the national dialogue was aimed at doing for the people of the North West and South West regions, then I am afraid we cannot have peace” he said.
Another very particular submission was that made by the President of the North West Chapter of Cameroon Association of English Speaking Journalists Ambe Macmillian Awa who frowned at the little or no consideration given to journalists of the region especially in times like this. “I am embarrassed at the fact that journalists of the region who know who is on the ground and know who is doing what where are carefully left out in situations like this. Are we not the fourth arm of government again? Even if you refuse to accord us that position can you not give us the respect we are due for the work of peace building we have so far been doing? If you will not have a meeting with the journalists of this region for them to tell you what holds where and who does what where, then you are heading for failure. Make good use of your journalists” he said.
There was also much tension at the meeting based on the unknown criteria that was used in the selection of the 10 delegates per division as some sub divisions like Bum sub division in Boyo was completely left out.
To who the delegates will go to speak and how they will get there, whether guarded or unguarded is the million dollar question that is yet to be answered even by the delegates themselves.

<https://thesunnewspaper.cm/post-dialogue-caravan-nw-sw-govt-picks-prelates-unlock-deadlock/>

1. **Legislative / Municipal elections: Biya sets date despite insecurity in NW/SW**

[November 12, 2019](https://thesunnewspaper.cm/6537/)

By NOELA EBOB BISONG
Amidst speculations that the Legislative and Municipal elections were going to risk yet another extension, in line with the fact that the North West and South West regions remain unstable security wise and therefore not suitable for elections, many have been taken by surprise, following an unusual Sunday presidential decree no. 2019/612 of November 10, 2019, to convene the electorate for the election of Members of Parliament and Municipal Councillors. Reports say president Biya quickly signed the decree while on his way out of the country. He had until November 15 to do so.

According to the decree, the electorate is convened on Sunday February 9 2020, wherein voting shall begin at 8am to close at 6pm. This comes after the mandates of MPs and municipal councillors had previously suffered two extensions, in 2018 and in June 2019. The candidates therefore have, from November 10, 15 days to drop their files, in line with the electoral law. Candidates for the Municipal elections are expected to drop their files at council branches, while those for the Parliamentary are to drop at the office of the Director General of ELECAM.
However, with the terrain in the country’s two Anglophone regions still rough, characterised by gun battles, kidnappings and other atrocities, with ordinary citizens living in constant fear and suspicion, on how elections will effectively take place in these two regions remains doubtful to many, who have been quick to judge that this might just be a ploy by President Biya to yield a massive harvest in the forthcoming twin elections.
Speaking to The SUN shortly after the presidential decree was released, the communication officer of the Cameroon Renaissance Movement CRM of Prof Maurice Kamto, Okala Ebode said though their party is not comfortable with the manner and timing of the twin elections, yet the CRM will participate in the elections, for they cannot sit and watch the CPDM of Biya grab all seats in the National Assembly and at local councils.
Following the Social Democratic Party SDF’s NEC meeting recently, the party reiterated that it will not take part in elections as long as the violence and insecurity continues in the Anglophone regions. This was a day before the elections were announced for February 9, 2020. At press time on Sunday, The SUN learnt that the SDF had convened an emergency meeting for Monday, November 11, 2019 to declare the party’s stance. The SDF party is the one to be most affected considering that its main electorate is the crisis-hit North West and South West regions, since those in the Littoral and West have been taken over to a large extent by the CRM of Prof Maurice Kamto.

<https://thesunnewspaper.cm/6537/>

1. **Gov’t rubbishes Human Rights Watch Report on Ngarbuh bloodbath -Says secessionists disguise in military attire to commit atrocities**

[March 2, 2020](https://thesunnewspaper.cm/govt-rubbishes-human-rights-watch-report-ngarbuh-bloodbath-says-secessionists-disguise-military-attire-commit-atrocities/)

By DOH JAMES SONKEY
The Government of Cameroon has vehemently refuted accusations contained in the report of Human Rights Watch saying satellite images prove that Cameroon Defence Forces is responsible for “the murder of twenty-one civilians, including a woman and thirteen children, in an armed attack carried out on 14 February 2020 in the locality of Ngarbuh, Donga Mantung Division in the North -West Region.”
In a press briefing last February 27, 2020, government Spokesman and Communication Minister, Rene Emmanuel Sadi expressed shock that Human Rights Watch has been closing eyes on atrocities committed by separatists in the two Anglophone regions.
The Minister said “we know today that most of these terrorists disguise themselves as police officers, gendarmes and soldiers, wearing the uniforms of the National Defence and Security Forces, to deceive the populations and commit the most unspeakable violence under the label of the Cameroonian army.”
Accompanying him at the press briefing, officials of the Ministry of Defence projected a video showing individuals dressed in Cameroon Defence and Security Forces uniforms and controlling vehicles at a checkpoint in the North West region. Though the video did not have any element on the Ngarbuh incident, the MINDEF officials declared that separatists deliberately wear military uniforms to commit atrocities so that they can accuse Cameroon Defence Forces.
The Human Rights Watch report titled “Cameroon: civilians massacred in separatist area,” published last February 25, 2020 incriminating Cameroon Defence Forces was described by Minister Rene Sadi as “overtly biased.”

Govt Spokesman, Minister Rene Sadi backed by MINDEF officials and collaborators

He revealed that “The Cameroonian Government has in fact been in possession for the past few days of irrefutable evidence establishing links between, on the one hand, Mrs Ilaria ALLEGROZZI, presented as a senior researcher at the NGO “Human Rights Watch”, author of the biased report incriminating the Cameroonian Armed Forces, and on the other hand, numerous secessionist terrorists who have regularly made available to her and at her request, since the beginning of the crisis in the North-West and South-West Regions, photographs, videos, as well as information on their various abominations, so that they may be used as arguments against our Defence and Security Forces. With regard to the links between the criminal gangs that sow terror and desolation among the populations of the two Regions involved, the arrest on 24 February 2020 of a dangerous secessionist terrorist named Nfor Yacubu and the appraisal of his mobile phone, made it possible to establish that this person maintains close relations of active complicity with Mrs Ilaria ALLEGROZI.”
The Minister went on that “Thus, in several of their exchanges by telephone messages, the latter asked the terrorist, who was then presented as a specialist in faking images for secessionist propaganda purposes, beyond all the crimes, violence and illicit trafficking in which he is engaged on a daily basis, to provide her with trumped up visual documents, photographs and videos showing the Cameroonian Defence and Security Forces committing violence against civilians.”
He said Mrs Ilaria ALLEGROZI is angry that “Cameroonian authorities decided to expel her from the national territory on 12 April 2019 and to consequently stop all collaboration with the NGO that employs her, due to the fact that the information she spreads about our country are permanently inaccurate and fallacious.”

<https://thesunnewspaper.cm/govt-rubbishes-human-rights-watch-report-ngarbuh-bloodbath-says-secessionists-disguise-military-attire-commit-atrocities/>

1. **Presidency, others hit back at Macron utterances**

[February 26, 2020](https://thesunnewspaper.cm/presidency-others-hit-back-macron-utterances/)

By DOH JAMES SONKEY
The French Embassy in Yaounde was last February 24, 2020 the centre of a mass protest by hun-dreds of Cameroonian youths who spontaneously converged on the Embassy to express their anger and bitterness against French President, Emmanuel Macron’s condescending attitude towards their President and Father of the Nation, Paul Biya.
Chanting patriotic songs in order to make their voices heard and protesting against any external pressure, the angry youths momentarily interrupted traffic in front of the French Embassy in the nation’s capital.
Even the scorching sun could not prevent them from demonstrating their bitterness through mes-sages such as “Mr Macron, No to neo-colonialism, Mr Macron, our only President is Paul Biya etc.”
Carrying banners, placards and peace plants, the youths most of whom were students of the Univer-sity of Yaounde II, Soa began a protest march in the streets of Yaounde and ended it in front of the French Embassy.

Cameroonian youths protesting with placards in front of the French Embassy in Yaounde

Shouting to the top of their voices, they summoned the French President or his representative in Cameroon, the Ambassador, to present an apology to Cameroonians for what they described as con-descending utterances.
The youths told reporters who rushed to the scene that “We cannot fold our arms and watch a for-eign country destroy the high reputation of Cameroon’s respectable Head of State, H.E Paul Biya. We are determined to take the fight to the international level if French authorities do not apologise to Cameroonians.”
The youths said President Macron’s constant mention of “putting pressure on President Biya” was very offensive to Cameroonians of all political leaning given that Cameroon is a sovereign State with a leader who has been democratically elected and shouldn’t receive orders from without.
The youths argued that the internal problems of the country are already being handled by Cameroo-nians themselves.
On his part, government Spokesperson and Communication Minister, Rene Emmanuel Sadi in a press statement described the utterance of French President as embarrassing to diplomacy and ve-hemently refuted allegations raised by the activists. Minister Rene Sadi said “in the contrary, all the unbearable horrible acts such as assassination, destruction of socio-economic infrastructures in the North West and South West since the beginning of the crisis are undisputedly the works of seces-sionist rebels.”
It was last Saturday, February 22, 2020 that French President, Emmanuel Macron who was inter-rupted abruptly by a Cameroonian activist, stopped and responded to concerns raised by this indi-vidual claiming that there is on-going massacre of Anglophones in the two English Speaking regions of the country.
The activist seized the opportunity to paint a gruesome picture of the socio-political situation in Cameroon and in response, French President, Emmanuel Macron seemly agreed with the description of the situation in Cameroon. He also made other declarations that violated diplomatic canons such as that he is the one who pressured President Paul Biya to free Prof Maurice Kamto and his supporters from prison etc.

<https://thesunnewspaper.cm/presidency-others-hit-back-macron-utterances/>

1. **After disavowal from Sisiku, others: Tassang fires back, insists Kamto is a liar**

[March 2, 2020](https://thesunnewspaper.cm/disavowal-sisiku-others-tassang-fires-back-insists-kamto-liar/)

Deacon TASSANG Wilfred, in response to the disclaimer on Prof Maurice Kamto, by Ayuk Tabe and eight others currently serving jail terms in Yaounde, on 26th of Feb.2020 sent out a message maintaining his stance on what he thinks about the CRM leader.
“When I wrote to denounce Kamto and warn Ambazonia against his wiles, I little imagined that it was going to raise so much controversy and attract this much attention. Am I worried? Not the least. If anything, this will unite the struggle as it has acted as precursor to the unearthing of evil most viciously hidden.
I was never brought up to shy away from controversies; not at home, not in school and certainly not in my new love with Jesus the Christ.
Romans 12:2
And be not conformed to this world: but be ye transformed by the renewing of your mind, that ye may prove what is that good, and acceptable, and perfect, will of God. If the whole world chooses to lie, I will not, because I will not conform to evil. I am in fact having the season of my life since our abduction because at last, falsehood that had been so carefully hidden under a pretentious façade is being exposed.
I confess my love for you, Ambazonia. And what is it about my love for you?
1Cor.13:6 Love is not happy with evil, but is happy with the truth. GNB
The truth is so very Central to this liberation struggle. No Truth, no justice, no liberation. I’ll die for it.
I am sorry for sermonising. In this note, I will by the grace of God, denounce the falsehoods that have once more been declared in the wake of the Kamto denunciation. The very first one is contained in a note by someone reacting to Bro. Xmas Ebini’s reaction to the Disclaimer. See it attached and highlighted here below. I’ll take it along with another by my fellow inmate Kisob Bertin, who also goes by the pseudonyms; Pastor Amba, and General Chop No Die.
Perhaps I should open up to you a little!! The US embassy sent an official recently to meet our jailed leaders and to inform them of the American position on the crisis in Southern Cameroons!! Immediately the official said, we have asked Yaounde to discuss with your leader Sisiku Ayuk Tabe!! Tasang interrupted the speaker and shouted that they should negotiate instead with the leaders in the USA and cited Sako and Chris!! Put yourself in their place Seseskou Ebini, will you continue to keep someone like that around?
In the note above that ends with a very visible threat to my life, (not that it matters) the author who is by all means a friend of Nera10-1, affirms that I, Tassang Wilfred rudely interrupted a US diplomat that visited us in jail as you can see above, etc etc. In Kisob’s diatribe, he says Batonier Akere Muna was the one who visited. I think it will be a sin against Ambazonia and my God if this particular matter is not addressed forthwith.
Let it be made abundantly clear that no US diplomat has visited us. Our only contacts with diplomats, US and others, has been in court. So, there is no way that I could ever have rudely interrupted somebody who didn’t come. Or could I..
On the other hand, Batonier Akere Muna did come, with two junior colleagues from Muna and Muna. Before I proceed, I will disappoint many to say here that I respect the Munas a great deal, and Batonier Akere in particular, my differences with him concerning Ambazonia notwithstanding. And this is why; during the preparations leading up to the trial of us Nera 10, Barrister Akere gave the only position that should have been ours, but it was put aside by Barrister Shufai who claimed he had a water tight strategy. Akere said with authority that we should not submit ourselves to the Military tribunal. According to the learned man of Law, Yaoundé had violated international Law and therefore should not try us. He said the court will try and sentence us in abstentia but it will be of nil effect. I thought it made sense, but it didn’t to learned Shufai Barrister Berinyuy B. We went to court and when Shufai’s strategy was put to the test, it was Akere Muna who came to the rescue. On the question of our identify following our declaration that we were Ambazonians, and not Camerounese, and when the court began presenting our identification papers, and passports, it was Akere who came to the rescue. The genius at Law sprang up and with brilliance, argued that passports and National Identity Cards were not proof of nationality, stating that by Camerounese Law, nationality is conferred by only one document; the cirtificate of nationality. He further stated that the latter certificate is valid for 03months only. He challenged the court to produce same, valid, to no avail. See why I respect the gentleman? But that is as far as it goes.
I can’t say that the Batonier merited the same esteem at all when he visited us on January 28 2020, even if I was in no way disrespectful of him. And what brought the Batonier? He was his own envoy and came to brief us on his efforts among African Heads of States (former) to bring about some form of forum on Cameroun. He did start by trying to insinuate that some diplomats in Yaoundé were looking up to those of us in jail. This greatly elated my brothers who want to be seen as the only legitimate leaders of the struggle. But, dear people, I saw further into the game plan. Batonier Akere badly wanted approval from Kondengui IG to achieve his project, and to my humble judgment, that plan was anti-restoration. I was about one of the last persons to react and I told our brother without mincing words that his project won’t fly. I advanced the following reasons:
I told him that the Southern Cameroons question was beyond Africa and the AU. I reminded him of the 2002 Banjul ruling which ruling was endorsed by the AU heads of States. What have they done about it? The AU cannot execute its own resolution. Moreso, since the conflict started, the AU has not made an objective statement on it. Why will we then trust the African Forum working under the auspices of the AU?
Secondly, I objected because the agenda of that forum is Cameroun and not the restoration struggle. According to Batonier Akere Muna, there would be *500 participants with 50 coming from each of the 10 regions. Another 1972 referendum? It came out clearly that the expected outcome was to be some transition government with Paul Biya at the helm. How will such a forum address Ambazonia?
On the third ground, I objected because he said they were negotiating for the Nera 10 to be given safe passage from Yaoundé to the Conference and back to jail. Yours truly, I told our brother with acid in my voice that it was not to be contemplated. We won’t attend a conference knowing that we would return to jail if we didn’t yield. Now that my brothers have an issue with my position, let them go; the son of my father will not.
With regards to my referring him to Sako and Chris, that is what you’d call a *half truth. But since no half truths exist, it is simply put, a lie. I did let Akere know that he was addressing the wrong audience. I referred him to President Sako whom he almost derided trying to pamper my brothers, and to Yerima, and Ayaba. Yes, I mentioned this three names.
For you who are angry that I listed Yerima, I did on purpose. I don’t know the man, but I long came to terms with reality; the split. I also know that those members of the KIG are there because they mean well for Ambazonia, and more importantly because they have not been told the truth. When that truth is exposed as it now is in the process of, shall they not all turn their backs on falsehood?
About the CIA investigating Sako. Come on. Even in a nightmare, Batonier Akere will not say a thing like that. Who doesn’t know what Langley does?
Now, only Nera 10 members were allowed in the meeting though Muna and Muna wanted to talk to all of us. Kisob Bertin was not part of that meeting therefore. It follows that those who disclaimed the Kamto denunciation have arranged for him to churn all these lies. Am not new to Kondengui. Is it not the same Kisob/Pastor Ambe who declared with their blessings that Nera 10 leaders had been poisoned and that President AyukTabe and 02 others had collapsed. And have they not filed a suit in court on this account as well? Shameful!
And have I not made reference freely to my brother the Batonier? Let even my father Pa Nfor disclaim me, this is theTRUTH.
I will also make allusion to a document I have learnt Shufai Barrister Berinyuy B. sent out, in which document he States that I, Pa Tassang Wilfred am their Press Secretary. Nothing can be further from the truth. Press Secretaries issue Press statements on behalf. Can he show me one that I issued? I did work with the Press Officer of our case, Barrister Amungwa, pushing and helping him to ventilate the struggle. Does that make me their Press Secretary? When Sisiku set up a team to provide answers to Jeune Afrique’s questions, was I part of the team? Now, they have another from “Le Messaged“.Ambazonia, should I not instead of denouncing Kamto have denounced Nera 10-1 first
Let me however thank Shufai for bringing clarity into our meetings with Kamto et Al. There were in fact 03 members in our team, not four as I said. Does this specification make Kamto not to be a liar? Shufai even went ahead to state that I was appointed to be in that delegation but I turned it down. For exactitude, let it also be known that Pa Nfor also refused to be part of that discussion because both of us were opposed to it.
However, since His Majesty Shufai mentioned this as though to contradict me, I’d have loved for him to tell Ambazonians the reasons I advanced. Can he? I told my brothers to keep a safe distance from those men. I reminded them of Kamto’s wit and his track record as listed in the controversial denunciation. I also let them know that the Kamto team would size us up and get facts which he would use against us subsequently. Even this wouldn’t fly with my brothers. Matter was put to vote and Pa Nfor and I lost. They went. Now, it has become anathema to say that a man who lied in Paris concerning us is a liar. Class, how do you call a man who lies? Answer!

**KAMTO LIES AGAIN**

Now it turned out that they were contacted by the CRM to issue that statement to satisfy the professor. This as you all now know, was told us in all innocence by Dr Ogok Ntui Egbe-Ngu. Is it not now clear how much rapprochement there is between Nera10-1 and Kamto?
To make matters worse, the same Kamto they are trying so had to defend and protect lied even to them. Are my brothers under a spell? The Disclaimer, Pa Nfor told me, was supposed to be confidential, yet it is out there. Is Prof. Kamto anything but a liar? Oh God! Help us.

**LRC 2018 Presidentials**

During the 2018 presidential election campaigns, the media wanted to know from the CRM candidate, Maurice Kamt how he intended to solve the “Anglophone problem if elected.” Several times, the Professor replied that the matter was left to the Cameroonian people, that he would handle it once he is president. Give me a break. Kamto was the only candidate in that election who didn’t have the war in Ambazonia as a worry. This politician is extraterrestial.
Just so I don’t sound insulting, I’ll overlook the tribal insinuation as well as the basic English confusion on who is fortunate and who isn’t.

**Attempt to Compromise**

A couple of weeks after the Kamto team left Kondengui, his party’s Secretary General, accompanied by a much older person and another, younger, paid us a visit in Kondengui. The older person we recognised as elder brother to one of Kamto’s allies who was in prison with us, for he came often. The younger gentleman introduced himself to me as one of a delegation that members of the Consortium received in Bamenda in January 2017. Prof. Uphie Chinje and Minister Fru Calixtus Gentry were others. These gentlemen were received by Sisiku Julius AyukTabe and Prof CA Awasum on our behalf. It was on a Sunday and because of this, we were only briefed on the visit the next morning after meditation. The old gentleman we were told, said he was a close friend of President Biya and so proposed himself to meditate between us and Paul Biya. Sisiku informed us that the man wanted us to write a letter of apology to Paul Biya in exchange of our release. That we refused to write that letter is not the issue. Matter is, I don’t know why this stroke me as odd and does not strike my brothers; that Kamto’s Secretary General would bring someone to us whose mission was to torpedoe the struggle. I don’t know whether you get my drift. I tremble even as I write this.

**On Disclaimers**

Before I end, let me note here that my Nera brothers have not written a disclaimer against the lies Kisob proclaimed about the meeting we had with Batonier Akere Muna which means they approve.
When I isolated myself from my brothers of Nera Hotel fame in May 2019, it was because I believed that their action was not only treacherous, but was treasonable. In disclaiming a note that had nothing to do with their persons in anyway, am sure my brothers also believed I had committed treason, or at the least, acted treacherously. Question is; against who? I don’t mind them coming out again to denounce this note, or deny the contents thereof.
It would however have made more sense if these defenders of the truth had started by disclaiming the wicked publication from Kisob Bertin alias Pastor Ambe which put Ambazonia into panic. They didn’t. Is it therefore true that we were poisoned and that Sisiku and two other
Nera 10 members collapsed? Didn’t they keep quiet because it suited their purpose? Or was it not a lie enough to warrant denunciation? Seems like a lie is whatever doesn’t suit their darker purpose. Hmmm.
My Nera 09 brothers are enraged because I am supposed to have stopped eating from the common table on account of the threat to my life from one of them or theirs (See note highlighted here above). Wouldn’t it have been normal for these experts in disclaimers to have distanced themselves from this note to Xmas Ebini. How on Earth can these men be angry that I fear for my life? Was their earlier crime that let to two governments not reason enough to have warranted my not eating with them? Now, I am furious, and terribly enraged myself. Can someone tell my brothers that they have many things to disclaim and some in arrears?
These are interesting times. The only thing I can say is that we pray even harder this Lent season. I believe very firmly that order is returning to the struggle. Ambazonia should get ready to forgive each other after the truth is revealed. We are closer more than ever before.

<https://thesunnewspaper.cm/disavowal-sisiku-others-tassang-fires-back-insists-kamto-liar/>

1. **Human Rights report on pre-electoral violence in Cameroon’s NW/SW**

[February 17, 2020](https://thesunnewspaper.cm/human-rights-report-pre-electoral-violence-cameroons-nwsw/)

Human Rights Watch interviewed 55 victims and witnesses of crimes committed by armed separatists and government forces since the elections were announced in November 2019, as well as opposition party members, candidates, and other residents of the North-West and South-West Anglophone regions. Human Rights Watch also reviewed satellite imagery and geolocated videos to confirm witness testimonies.
Cameroon: Election Violence in Anglophone Regions
Investigate Abuses; Ensure Justice
(Nairobi) – Armed separatists in Cameroon’s Anglophone regions kidnapped over 100 people, burned property, and threatened voters in the period before the February 9, 2020 elections. State security forces did not adequately protect civilians from the threats posed by the separatists but rather committed further abuses against them during the same period.
“Separatist leaders should issue clear instructions to their fighters to end their crimes against civilians,” said Lewis Mudge, Central Africa director at Human Rights Watch. “The government of Cameroon should ensure that its security forces put civilians first, by stopping their violations, prioritizing civilian protection, and holding abusers accountable.”
Human Rights Watch interviewed 55 victims and witnesses of crimes committed by armed separatists and government forces since the elections were announced in November 2019, as well as opposition party members, candidates, and other residents of the North-West and South-West Anglophone regions. Human Rights Watch also analyzed satellite imagery and video footage to independently corroborate witness testimony.
Clashes between armed separatists and government forces, as well as between rival separatist factions, have resulted in civilian deaths, with people either killed deliberately or caught in the crossfire. At least several dozen people have been killed in scores of incidents since November, based on a review of credible media accounts, records produced by some United Nations agencies, and Human Rights Watch research. However, with no official mechanism monitoring how many civilians have been killed over the crisis, reliable confirmation of the numbers of people killed, the circumstances around killings, and alleged perpetrators remains difficult.
Armed separatists targeted those willing to participate in the legislative and municipal elections, whether as candidates, election officials, activists, or citizens. The targets included members and supporters of the Social Democratic Front (SDF) party, which the separatists accuse of failing to show solidarity with their cause. Separatists burned at least three offices of Elections Cameroon (ELECAM), the national election body, in Misaje, North-West region, on January 7, 2020; in Babessi, North-West region, on January 16; and in Tombel, South-West region, on February 2. Separatists have also burned down a post office where electoral material was stored in Bafut, North-West region, on the eve of the elections, and at least seven homes belonging to government officials and candidates in various localities in the North-West region since November 2019.
Rather than protecting civilians from these attacks, government forces committed their own violations against them. Between January 17 and 20, 2020, security forces carried out a military operation in Bali, North-West region, destroying over 50 homes and killing several civilians, including two men with intellectual disabilities.
After elections were announced, separatists called for a boycott of the vote in the Anglophone regions. Both before and during the election, the separatists threatened those who wanted to take part and warned people to stay home. In a December 22, 2019 statement, Ayaba Cho Lucas, the leader of the Ambazonia Governing Council, a major separatist group, said that anyone who sought to participate in or promote the elections would face consequences.
On January 5, 2020, separatists burned down the home of Wilfred Fusi Naamukong, a member of parliament from the SDF in Mankwi, North-West region. Fusi told Human Rights Watch he was targeted because he was a member of the SDF.
While official statistics on the turnout are yet to be announced, in a statement released at the close of the polls, the minister of territorial administration said that the population in the North-West and South-West regions “turned out massively to exercise their civic duties in all the administrative units.” However, media reports indicate that voter participation was low in these regions because of insecurity and fears driven by the threats and attacks of the separatists.
“I wanted to vote, but I did not. I didn’t want to get a bullet for exercising my right. Separatists attacked candidates and voters. The military has been unable to protect the people,” a resident from Kumbo, North-West region, told Human Rights Watch on February 10.
The ruling Cameroon People’s Democratic Movement (CPDM) exerts control over the political space in the country. However, opposition parties, including the Cameroon Renaissance Movement (CRM) and the SDF, do have representatives in parliament.
Opposition parties, including the CRM and the Cameroon People’s Party (CPP), had also called for a boycott of the elections, citing security concerns and the need to reform the electoral system. Ahead of the elections, Emmanuel Simh, a lawyer for the CRM, told Human Rights Watch: “People are not free to vote as they wish across the country. We can’t hold important elections in a war zone and when children have not been to school for three years.”
Seven hundred additional security forces were deployed ahead of, and during, the elections across the Anglophone regions. Municipal results are expected by February 12, and legislative results are expected by February 29.
In a January 24 joint statement, the secretary general of the Economic Community of Central African States, the special representative of the UN secretary-general, and the head of the UN regional office for Central Africa called for the electoral process to unfold in peaceful and secure conditions, and condemned attempts to restrict the right to vote with threats or violence.
“Not all who wanted to cast their votes in these volatile regions in Cameroon were able to do so in peace and security, and it is incumbent on the government to hold accountable all those responsible for that from all parties,” Mudge said. “Leaders of armed separatist groups should rein in their fighters and government forces should protect civilians and not abuse them.”

To be continued

<https://thesunnewspaper.cm/human-rights-report-pre-electoral-violence-cameroons-nwsw/>

1. **No country in the world is perfect – PM Dion Ngute**

[February 13, 2020](https://thesunnewspaper.cm/no-country-world-perfect-pm-dion-ngute/)

By NOELA EBOB BISONG
Chief Dr. Joseph Dion Ngute, Cameroon’s Prime Minister PM, Head of Government, has appealed to the minds of Cameroonians, especially his Anglophone brothers and sisters, to understand that no country in the world is perfect, calling on them to shun violence, as “we are the architects of our own destiny.”
The Head of Government was speaking in Buea, last January 6, 2020, during a campaign rally for his party, the ruling Cameroon People’s Democratic Movement, CPDM, ahead of the February 9 twin elections.
A separatist imposed lockdown had welcomed the PM to the region that day, but he braved it all to inspect sports infrastructures in Limbe, before addressing comrades of his party, but generally the entire Anglophone public, in Buea.
After having been received by the traditional authorities of his native South West region and dressed according, (himself being their peer from Ndian Division), the PM, in his keynote address went straight to the burning issues affecting Anglophones generally.
“I want to say that the socio-political situation has greatly improved as compared to the time of my last visit in May 2019. This is to a large extent due to your ceaseless efforts to bring peace. I want to thank you sincerely for that”, he noted.

Chief Dr Joseph Dion Ngute appeals to Anglophones shun violence and embrace peace

Giving a balance sheet of the Major National Dialogue MND of which he was a key player, Dion Ngute mentioned that the MND was based on topics to strengthen Cameroon’s unity, facilitate development and ensure greater stability for the fatherland.
Following the deliberations of the MND, he highlighted the four major recommendations as follows:
“The Special Status for the North West and South West regions which has already been promulgated into law following the last December 2019 extra-ordinary session of Parliament…I hope and I believe that this has already met the aspirations of the people especially those of the North West and South West. If not, I want to reassure you that it is a work in progress. As such, efforts shall be maintained to continue improving on the situations in these two regions. The Special Status gives the North West and South West regions enhanced powers to participate in the development of national policies especially those relating to the Anglo-saxon system of Education and on the issues concerning justice in the common law systems.”
According to the PM, “The General Code on regional and local authorities has also provided for accrued resources for councils and regions, moving from 4% before to 15% as from this year.”
He mentioned that “The dissolution of the post of appointed government delegates to be replaced by that of an elected central city mayor is a clear signal of the deepening of our democratic process at the local level.”
On improving the practice of bilingualism in accordance with Law no 2019/019 of 24 December 2019 on the promotion of bilingualism, Ngute held that “One of the key aspects of this law is to institutionalise the equal practice of both languages in the official domain.”
Concerning the reconstruction of the North West and South Wes regions, Ngute took time to explain that “Government has opened discussions with our development partners in view of the reconstruction of the North West and South West regions. Some countries have already donated funds for this exercise. The government is also putting aside resources to fully embark on the reconstruction exercise. In line with this, a decree has been enacted declaring the North West and South West regions as economic disaster zones in order to ease the procedures and reduce the delays in bringing on line the resources needed to reconstruct the two regions.”
He however stated that “For this reconstruction phase to begin, we need peace! It is therefore in the interest of the North West/South West regions that we turn our backs to insecurity and violence.”
The PM equally announced, to the delight of many at the rally who responded with thunderous handclaps, that the project team for the construction of the Limbe Deep Seaport is currently being set up, assuring that the project will soon be a dream come true.
“My dear people, we have to take advantage of this peace plant extended to us by the president of the republic; we have fought for too long, killed and inflicted pain on ourselves, destroyed our infrastructure, our economy, our educational system and the list goes on. It is worrisome that for close to four years now, the rate of children attending schools has dropped drastically…what future are we preparing for these innocent children?” he questioned.
The PM went on that “Those who promised our young boys and girls for a brighter country in two months are living quiet lives abroad and their children are all attending good schools. They are making a lot of money from this unrealistic secessionist enterprise at the expense of your blood, let us not be deceived again, there has been a lot of bloodshed in the North West/South West regions, let it stop now!”
Ngute noted that “I know that we have problems, I have come so that we jointly acknowledge our imperfections and agree to move in peace and security. Our house is on fire and we must rescue it. We have observed the unfortunate crisis and we can draw conclusions. It is clear to us that violence has no future; it has never been a solution to any difficulty…ghost towns, lockdown, threats to life, kidnappings, killing, banditry, destruction of state property, civil disobedience etc cannot constitute a solution to our problems, we can only resolve our problems in brotherly love and peaceful dialogue…please there is a time for everything, there has been a time for violence and hatred, let us agree that the time has come for peace and love to reign”, appealed Chief Dr Joseph Dion Ngute, to his South West and North West brethren.

<https://thesunnewspaper.cm/no-country-world-perfect-pm-dion-ngute/>

1. **Agbor Balla re-iterates stance on two-state federation**

[January 30, 2020](https://thesunnewspaper.cm/agbor-balla-re-iterates-stance-two-state-federation/)

By NOELA EBOB BISONG
Few months after the much-talked about Major National Dialogue MND, which some held was going to mark a turning point in Cameroon’s history, notably in terms of its franco-anglo romance, as though to point out that the MND was not such a remarkable event after all, frontline Anglophone activist, Barrister Nkongho Felix Agbor (Agbor Balla) has reiterated the fact that a two-state federation remains the panacea to the country’s deadlock in its two restive English-speaking regions.
Agbor Balla took to Social Media on Monday, January 27, 2020 to state that:
“A two state federation is the Solution to the crisis. Any other solution be it decentralization, 10 state federation or a special status are only stop-gap measures. We shall have to go back to the drawing board to address the fundamental issues.”
This recent outing by the ace Cameroon legal mind denotes one of frustration with the current state of affairs even after the MND. He was one of the key players during the event, a member of the Decentralisation committee, wherein some telling recommendations emanated. Balla was confident that ‘something’ will come out of the MND.

Shortly after the MND, in a lengthy exclusive interview he granted The SUN, Agbor Balla had said though not enthusiastic since the form of the state was not on the agenda, he was positive about the MND and was waiting to see what becomes of the recommendations. “It’s true that the ‘form of the state’ was not on the agenda but in the final report from that commission, they did mention that some people had raised the point that Federation will be the solution to the problem. It recommended a ‘special status’ which is not what those of us who stand for federalism will want, but I look at it as a long journey that we are going. We just started; the dialogue cannot solve the problems, but at least it is a step in the right direction. I’m more focused and interested in what will be in the special status; can we use what the Quebecers have as an example; could it lead to an amendment of the constitution to include the ‘special status’ of the North West and South West regions in the constitution…”
Talking about what he thought could make up the Special Status content, Balla brought forth a document spelling out what ought to be, which he presented to France’s Minister for Europe and Foreign Affairs, Jean Yves Le Drian last October 23, 2019. He told Le Drian that the Special Status “provides an important opportunity, if handled correctly, to respond to several demands underlying the unrest in the Anglophone regions, and are awaited with optimism by a large number of moderate Anglophone actors.”
He also beckoned that “Please encourage the Cameroonian authorities to take a participatory, constructive, and inclusive approach to developing the content of the Special Status framework for the NW/SW. As at the National Dialogue, Anglophone constituencies (education unions, legal unions, religious bodies, civil society, political leaders) should be allowed freely to discuss, debate, and propose what content is most appropriate for the Special Status for the regions. Government should avoid imposing, or developing the content alone, without wider public support in both regions.”
Barrister Nkongho further implored Le Drian to “Please encourage Cameroon’s Government, while maintaining all its regions under the national umbrella, to focus on identifying areas where enhanced devolution, or self-management of certain domains, will enable all components of its population to realize their full potential, and thus in diversity, contribute to building a stronger Nation. Please offer your continued availability (and that of international partners) to support the Cameroonian authorities and all actors in the crisis, to implement and make this a reality.”
Though he never at any time drifted from his position of Federalism, perhaps the announced Special Status, described by many as scanty in content and not fit to solve the dilemma in the North West and South West regions (as atrocities continue) has caused Agbor Balla to re-echo what he believes remains the ultimate solution to the crisis.

<https://thesunnewspaper.cm/agbor-balla-re-iterates-stance-two-state-federation/>

1. **PM Yang in Bamenda to counter calls for May 20 boycott**

[May 8, 2017](https://thesunnewspaper.cm/pm-yang-bamenda-counter-calls-may-20-boycott/)

By Wifah Jennyhans Nde
Prime Minister Philemon Yang has embarked on another trip to the North West Region over the weekend a day after one of his cabinet minister; Andre Mama Fouda, minister of public health left that part of country to launch work on the construction of the University of Bamenda referral teaching hospital. An event which did not witness the usual ritual of ‘laying of the foundation stone’.
This trip by Yang marks at least the seventh time he is taking an official visit to the North West in seven months not to launch construction works or leisure but to appease his brothers and sisters from his region of origin to give room for peace and let the regime whose government he heads to be seen as winning.

Sources say the PM’s visit this time around is to counter calls for boycott of the National Day on May 20 this year championed by mostly Anglophone activists in the Diaspora. The relevance of the PM’s visit cannot be overemphasized given that previous calls for ghost towns and boycotts have proven to be very effective in that part of the country. In his capacity as the leader of the permanent regional delegation of the ruling CPDM party for the North West, he is expected to rally militants massively to turn out for the august event come what may.
He began with a meeting with officials of the party from the seven divisions that make up the North West, ministers of North West origin, Senators, MPs, Mayors, Traditional rulers and other local officials of the party within the North West region. The ultimate goal for Mr Yang’s visit to the North West this time is to at least ensure CPDM militants of the region turn out massively on the National Day come May 20 in Bamenda despite calls for a boycott.
Philomen Yang has, in the recent past, been the major firefighter for the Biya government since the start of the Anglophone crisis which is its seventh month now. He was the first to convene a meeting in Bamenda, November last year to dialogue with Anglophone lawyers and teachers’ representatives when at the same time his cabinet ministers; Lorent Esso, Fame Ndongo, Issa Tchiroma, Ernest Ngalle Bibehe and Yusuf Hadija were holding a press conference in Yaounde to denounce the existence of an Anglophone problem in Cameroon.
He was a victim of November 8, 2016 saga in Bamenda when he and his party officials including the Secretary General, Jean Kwete attempted to organize a party rally in Bamenda. The ‘rally’ which was scheduled to hold at the commercial avenue finally ended up in the confines of Ayaba Hotel amidst heavy military presence after some youths protested against the rally. The protest turned violent leaving at least 2 deaths and excessive militarization of that city, Bamenda has still not recovered from that chaos till date.
PM Yang had recently also organized and spearheaded a regional tour across the seven divisions in the North West to convince parents to send their children back to school between March 6 and 10, 2017 but met with rather a more disgruntled public against the regime, posing questions which the PM could hardly attempt answers to. The tour ended in futility as till date schools still remain closed.
The fate of his visit to the region and meetings with party officials this time is yet to be known as May 20 this year shall tell. Pundits strongly worry if it can bear any fruits as lawyers were recently defiant to calls by the Bar council president to return to court on May 2, 2017, calls for ghost towns operations seem to remain an oath between the people of North West and whoever is calling for them. Government’s indecision to heed to the people’s call to liberate all those who have been arrested in connection to the Anglophone crisis which has grounded most schools in the two Anglophone regions for over six months now, leaves a dark cloud in the sky.

<https://thesunnewspaper.cm/pm-yang-bamenda-counter-calls-may-20-boycott/>

1. **Journalists celebrate Press Freedom Day amidst heavy govt crackdown**

[May 3, 2017](https://thesunnewspaper.cm/journalists-celebrate-press-freedom-day-amidst-heavy-govt-crackdown/)

By Wifah Jennyhans Nde
Press freedom could be defined as the right of journalists or media organs to publish information without government censorship or control. Its practice started centuries back in the U.S and later spread across the world.
The existence of press freedom in Cameroon is a bleak reality. It is finely inscribed in the constitution of the land but the practice of which is a nightmare particularly to those who practice the profession, journalism. As Gwain Colbert a journalist in Bamenda puts it, ‘the law allowing press freedom in this country is finely crafted and abandoned in the cupboards for the documents to be eaten up by dust’. He further insinuates that contrary to this year’s theme on world press freedom day, ‘Critical minds for critical times: media’s role in advancing peaceful, just and inclusive societies’, in the context of Cameroon it should be uncritical minds for critical time…. He argued that the press freedom in

The SUN’s Atia Tilarious and 8 other journalists have spent more than 63 days behind bars without being charged

Cameroon is one in which people can be arrested just for thinking critically. Making reference to his radio talk show programme, Press and Associates with a local radio in Bamenda, he says while running the program, you find the radio proprietor always coming around to censor what should be said on air and even when the proprietor is not around, sometimes they are not sure of getting home after the programme. To him, press freedom in Cameron is still a dream, a dream desired by so many it becomes a reality. ‘Government officials interpret press freedom to mean the proliferation of media houses in Cameroon which is absolutely wrong’ Colbert expands.
According to the reports of Reporters Without Borders of 2016, Cameroon is one of the worst countries in the practice of press freedom ranked, 130 of 165 countries recently.
The press has constantly been on attack from diverse entities. While the government is persistently on the neck of the press to censor information that may hurt their reputation, ‘the regulatory organ, National Communication Council has remained pro-regime and operates as disciplinary body rather than an independent and objective organ’ as Peterkins Manyong puts it.
Repeated crack down on the press through court hearings sanctions ranging from suspensions to complete ban of programs, media houses and journalists and sometimes sentenced to prison with huge financial fines add to the already existing pains suffered by press men and women in the country.
On December 6, the National Communication Council (NCC) Cameroon’s media regulator handed down 24 sanctions imposing varying penalties on 14 publishers and their newspapers, the managing director of a radio station, and 15 journalists from 10 print and online newspapers, radio, and television stations for reports the council called “unfounded, offensive, and insinuating allegations” regarding government officials, business executives, and private individuals, according to media reports.
Among the most stringent sanctions were the permanent banning of the weekly Aurore Plus and Aurore newspapers from publishing, and the imposition of a permanent ban on the newspaper’s publisher, Michel Michaut Moussala, from practicing journalism because of the newspaper’s repeated publication of “unfounded allegations” badly playing down on press freedom in the country.
Ahmed Abba a journalist with Radio France Internationale Hausa-service was arrested and sentenced to 10 years imprisonment on claims of being involved in terrorism. Without vouching for victims of whatever crime by journalists against whomever, journalists should receive fairer trials bearing in mind that they risk their lives in the interest of public.
Speaking to the SUN, Peterkins Manyong, the publisher of a newspaper with headquarters in Womb suggested that government should decriminalize libel. “Journalists, on no grounds, should be sentenced for practicing their profession”. He adds that there is no country in the world which practices press freedom that criminalizes libel.
The wake of the Anglophone crisis recently also brought to forefront the degree to which press freedom in Cameroon is a total sham. Rampant arrest of journalists on mere basis that their mobile phones had some messages in them which of course is one of the working tools of journalists. Some were brutalized struggling to get images for their news at meetings with government officials and their cameras either seized or damaged right before them.
The Ministry of Communication through its regional delegations particularly in Anglophone Cameroon warned private broadcasters from broadcasting political debates linked to the Anglophone crisis. “Owners of private radio and TV stations are called upon to stop all roundtable discussions on their networks concerning the current political atmosphere in the southwest region”, the directive read, according to a photograph of the document published to Twitter by Cameroonian journalist Comfort Moussa.
Paranoia seems to have crept in amongst journalist in Cameroon today as many a scared to even voice their thoughts and are bound to walk a fine line to avoid government crackdown. Peterkins says as a publisher, like most of his colleagues too, they have now embraced what he termed ‘extreme self-censorship’. He recounted that even when reporters bring relevant facts which can ‘hurt some people’ they are forced to eliminate facts in order not to run the paper into problems or land the reporter to prison.

<https://thesunnewspaper.cm/journalists-celebrate-press-freedom-day-amidst-heavy-govt-crackdown/>

1. **Common Law Lawyers to resume work on May 2**

[April 10, 2017](https://thesunnewspaper.cm/common-law-lawyers-resume-work-may-2/)

Common Law Lawyers to resume work on May 2

By Elah Geoffrey Mbongale
Lawyers of the Common Law extraction in the North West and South West regions of Cameroon on May 2, 2017, regain the courts thereby ending their almost seven month-long grounding of judicial proceedings in the two Anglophone regions of the country. The decision was arrived at following a conclave that held in Buea on Saturday, April 8, 2017, that brought together some 20 senior lawyers from the North West and South West.
The Buea conclave was organized by the president of the Bar Council, Me. Jackson Ngnie Kamga after two prior meetings he held with South West lawyers and North West lawyers in Buea and Bamenda respectively where lawyers expressed the need for a conclave of lawyers from both regions to arrive at a consensus decision regarding the future of the strike.

Batonnier Jackson Ngnie Kamnga

Speaking to Batonnier Jackson Ngnie Kamga on the sidelines of the Buea conclave, he revealed that for the past five months, the Bar Council has been working to look for solutions to the grievances presented by Anglophone lawyers relating to the erosion of the common law legal system. He said it was important that the Bar Council, made up of 50 members, to go to the field and talk with the parties concerned, reason why they held a meeting with lawyers in Buea and Bamenda to evaluate the situation and try to look for a way forward.
Ngnie Kamga revealed that, at the first meeting in Buea between the Bar Council and Southwest lawyers it was resolved that another meeting should be held with North West lawyers. The Bamenda meeting with North West lawyers also resolved and stressed the need for a conclave of lawyers from both regions, the Bar council president added, reason why a conclave was held in Bamenda two weeks ago followed by another conclave in Buea over the weekend which resulted to the decision for lawyers to resume work by May 2.
Batonnier Kamga announced that: “At the conclave in Buea made up of lawyers from the North West and South West regions, my colleagues have decided to resume work…they came to this decision because of what the government announced recently. My colleagues have acknowledged what they government has announced and have also decided to reciprocate with some measure of good faith.”
Ngnie Kamga furthered that as a show of good faith by the Common Law Lawyers, they have decided to resume work on May 2, to pacify the situation on the ground and give room for the implementation of the measures recently announced by the Minister of Justice and Keeper of the Seal, Laurent Esso, which include amongst others; the creation of a Common Law bench at the Supreme Court, the creation of a Common Law section at the National school of Administration and Magistracy, ENAM, the redeployment of legal and judicial officers to regions according to their language of proficiency etc.
According to the Bar Council president, the Buea conclave equally mandated the Bar Council and its president to ensure the effective implementation of the aforementioned ministerial decisions and the release of their colleagues who have been arrested and are now in detention in Yaounde.
Quizzed whether the eventual resumption of work by lawyers is preconditioned on the release of the detained Anglophones and the restoration of internet in the English speaking parts of the country, the Batonnier answered in the negative. He stressed that the decision was arrived at due to the concessions made by government through the minister of Justice which were, in the face place, the original grievances advanced by Common Law lawyers to the Ad hoc committee in charge of addressing Common Law lawyers’ grievances. He however pledged to fight hard for the release of Barrister Nkongho Felix Agbor Balla and other colleagues who were arrested. He equally promised to press on the issue of internet restoration in the North West and South West regions.
“I had earlier informed my colleagues of the Common Law extraction that, it is not easy for me to negotiate in Yaounde while the situation still remained the same in the field…in a negotiation process, both parties have to show good faith. The government have shown good faith and the lawyers had to reciprocate. It will now be very easy for meeting to negotiate with government and press on the concrete implementation of the decisions announced and the release of my colleagues from detention.” He added.
Asked if his negotiation for the release of lawyers will extend to other Anglophones arrested during the ongoing unrest, the Bar Council president announced that on Friday, April 7, there was a consolidation of all cases relating to the Anglophone crisis and there is no way one can ask for the release of the lawyers without asking for the release of all.
“As the president of the Bar Council, I will start with the case of my colleagues, knowing that if they are released, they others will automatically be released also.”
Asked if the lawyers at the conclave had the mandate of their colleagues to ensure the eventual respect of the May 2 resumption, the Bar Council president said “I have not summoned a general or regional assembly of North West and South West lawyers, I understand the importance my colleagues of the Common Law attach to seniority and that is why I summoned very senior colleagues to advise me on the way forward and they all told me they want to resume work. The Bar Council will now meet to acknowledge what the very senior colleagues from the North West and South West have said and I am sure that their decision will not be contested by other colleagues.
“There is also the issue of recommendation; where it was agreed during the two meetings that held in Buea and Bamenda that ten lawyers from the each region should meet in a conclave. Senior lawyers from both regions were selected to represent their regions at the conclave and they arrived at the decision.”
Some lawyers The SUN spoke to express optimism with the decision arrived at but warned that, according to another resolution arrived at, lawyers will resume work on May 2 but will resume the strike on July 31 should the government fail to live up to its promises. However, some other lawyers have sounded their disappointment at the decision to resume work without the release of their colleagues being a precondition.
It is worth mentioning the four presidents of the lawyers’ associations who initially called the strike were absent from the conclaves. The president of the Fako Lawyers Association,FAKLA, Barrister Nkongho Felix Agbor was arrested last January 17 and is still being detained. Barrister Eyambe Elias and Barrister Bobga Harmony of the Meme Lawyers Association, MELA and the North West Lawyers Association, NOWELA respectively have fled the country for fear of being arrested while the whereabouts of the president of the Manyu Lawyers Association is unclear.
It is positive move
To be objective, the recent reforms are a positive step towards solving the Anglophone problem in general and the issues pushed by Anglophone lawyers in particular. Though they are belated; coming at a time when a lot has happened, like the arrest and detention of some of our colleagues, but it is better late than never. They lawyers have however asked the Government fulfilled some conditions before we go back to work. These include; the release of those arrested and restoration of the internet. If the Government has gone this far in solving the issues plaguing the nation, I think they can go as far as granting clemency to those arrested. I am certain that this will go a long way to balance the atmosphere. I am really disturbed to have stayed out of the courts, where I belong, for over six months now. However, it would not make sufficient sense if we go back to court while our colleagues are lamenting in Yaoundé. In my opinion, the Government has done a lot already. Why not bend a little further by fulfilling these very light demands so that we can go back and work with conscientious physical and emotional convenience?
-Barrister Arrey Collins, legal practitioner and notary
It is the first step to arriving what we are asking
I have read extensively the statement made by the Minister of Justice, Keeper of the Seal. I think the Government is trying to address some of the issues. Nonetheless, the communiqué from the minister is at the prelude of fulfilling the demands of the lawyers. I think that if the Government shows good faith, by the next parliamentary session it would come up with the reforms which we are asking. It all boils down to trust; whether we are going to trust what they are saying or not. The ball is now in their court. Government should be able to assure us that what they are saying is what they are going to do. We are therefore hoping that since we have been down for about six months now, Government needs to understand that they cannot make such important declarations and abandon them on the way.
-Barrister Ebah Ntoko Justice, Cameroon Bar Council member

Government is moving at a snail pace
I was fortunate to be a member of the Adhoc committee set up by the Prime Minister to look into the grievances of the lawyers. At the end of the deliberations; we arrived at five resolutions, one of which was the creation of a common law bench at the Supreme Court. The Minister of Justice has informed us that he has received instructions from the Head of State to make a draft bill on how to amend the law on judicial organisations so that the common law bench can be effective. We believe very strongly that if all the five points are fully implemented, the problems of the common law lawyers shall be solved. Unfortunately, the Government is moving at a snail pace because it has taken it six months to arrive at what appears to be a solution. We are therefore urging the Government to move fast in implementing the remaining four points of the resolutions, particularly that of the deployment of civil law trained magistrates from the common law regions.
-Barrister Henry Ngale Monono, Barrister at law and member of the ad hoc committee
They are mare proposals not reforms
To me the reforms were not announced rather, they were proposed for consideration and at this time, the minister would have come up with has been done rather than what still has to be done. It is always on paper but until it gets into action, it is never a reform. We are still leaving in the old system, working and operating under the old system on a daily basis.  At this juncture nothing can be called a reform until it has sworn into action.
Barrister Michael Tamukong Valentine of the Liberty Law firm

<https://thesunnewspaper.cm/common-law-lawyers-resume-work-may-2/>

1. **Call off strike for Agbor Balla to be freed**

[March 21, 2017](https://thesunnewspaper.cm/call-off-strike-agbor-balla-freed/)

– Bar Council President tells SW lawyers
By Elah Geoffrey Mbongale and Talla Agha Christopher

The president of the Cameroon Bar Council, Barrister Ngie Kamga in a meeting with South West lawyers on Saturday, March 18, 2017 at the Parliamentarian Hotel in Buea, urged them to call off their strike so that their colleague, Fako Lawyers’ Association president, Barrister Agbor Nkongho Felix can regain his freedom.
Barrister Jackson Ngnei Kamga was in Buea to try to persuade the lawyers to call off their strike which started since October 11, 2016. He regretted that the stalemate in the Lawyers’ strike has pushed both sides to the extreme.
“As soon as Lawyers put on their wigs and regain the courts, government, from all indication will have no other option than to release Barrister Agbor Balla”, The Bar Council president told the adamant lawyers who pressed him for more assurances.
The lawyers insisted that only after Barrister Agbor Balla is released that they could consider calling off the strike. They also called for amnesty for Barrister Agbor Balla and other colleagues that were in negotiations with the government prior to their arrest for dialogue to continue.
The South West lawyers told the Bar Council president that it will take a unanimous decision from North West and South West lawyers for the strike to be called off and so suggested to the Batonnier to select a commission of 20 lawyers from both regions to decide on how and when to end the strike.
In the light of the above, the Bar Council president left the Buea meeting empty handed but will be embarking on another trip to the North West region to meet with lawyers and try to persuade them to call off the strike.
It should be recalled that Barrister Agbor Nkongho Felix Balla, FAKLA President and President of the outlawed Cameroon All Anglophone Civil Society Consortium, CAACSC , was arrested last January 18, 2017 alongside the Secretary General of CAACSC, Dr. Fontem Neba and whisked to Yaounde where they have been detained since.
The lawyers of the Common Law extraction have for over six months now paralysed court activities in the North West and South West regions after they embarked on a strike action to decry and denounce what they termed the Francophonisation of their Common Law system. Their strike action was later followed by that of Anglophone teachers who also decried a similar fate. The strikes have now degenerated to what has now been termed “the Anglophone crisis.”

<https://thesunnewspaper.cm/call-off-strike-agbor-balla-freed/>

1. **SCNC activists flee as gov’t steps up clampdown home and abroad**

[March 6, 2017](https://thesunnewspaper.cm/scnc-activists-flee-govt-steps-clampdown-home-abroad/)

By Simon NdiveKalla

As the Anglophone crisis, which has now spiraled into an armed struggle, worsens in the North West and South West regions of Cameroon, the government has intensified its efforts to crack down on activists of the Southern Cameroons National Council (SCNC) and other activists both within and without the country.

The government has always accused SCNC members and other Anglophone secessionists in the diaspora of propelling the Anglophone crisis; which the government has labelled as “terrorism”. The Minister of Communication, IssaTchiromaBakari, earlier emphasised that, the government will not dialogue or negotiate with terrorists. Sources have revealed that, the government is using its diplomatic networks to ensure that SCNC members and other Anglophone activists abroad are tracked down and extradited for prosecution

Most of the activists who have been arrested are being detained under horrendous and inhuman conditions. Some have died in detention.

It would be noted that many Anglophone activists including NforNgalaNfor Chairman of the SCNC, Sessekou Ayuk Julius Tabe, the Nigeria-based president of the Southern Cameroons Governing Council, Mark Bara Bareta, Eric Tataw, Ayaba Cho Lucas, Gilbert Nkenganyi Azenganyi and Tapang Ivo Tanku among several others have been declared wanted by the Cameroon government.

After releasing a list of Anglophone activists in the Diaspora, who were targeted for arrest some time ago, sources say a fresh list of SCNC members and other activists abroad has been re-established for arrest; more than a hundred names have reportedly been given to intelligence services.

Anglophone activists including Gilbert Nkenganyi Azenganyi protesting in New York against the Biya regime

We learnt from informants that after several meetings held in Yaounde in a bid to seek ways to neutralise the growing Anglophone activism both within and without the country, a bigwig of the regime was sent on a mission abroad to lobby his way in causing the UN and other diplomatic services to frustrate the Anglophone struggle by neutralising those in the Diaspora via their arrest and extradition.

As the Cameroon government continues on its scheme to clamp down on the Anglophone activists, many of them have been fleeing the country while those in the diaspora now fear for their lives.

One of them is Gilbert Nkenganyi Azenganyi, a member of the SCNC and leader of the youth wing, who has escaped out of the country since May 29, 2013.

On March 3, 2017 he took part in a mass protest of Anglophone Cameroonians. The mass demonstration which took place in New York, had the protesters calling on the United States government to put pressure on the Yaounde regime and bring an end to what they termed genocide going on in the two English-speaking regions of Cameroon.

It was Azenganyi’s participation in the protest that caused him to be blacklisted by the regime as being among those who want to destabilise Cameroon. The Cameroon government thus published a list of some of those, including Gilbert NkenganyiAzenganyi, who participated in the demonstration, declaring them wanted.

If Gilbert Nkenganyi Azenganyi is arrested by the Cameroonian security forces, he will be tried under the anti-terrorism law, whose maximum punishment is the death penalty.

**Origin of crisis**

It is worth recalling that the Anglophone crisis, something that pundits say had been brewing for several years, boiled over in November 2016, when Common Law Lawyers in the North West and South West regions went on strike. They were demanding for the return of the federal system of government, redeployment of Civil Law Magistrates back to Civil Law Courts in French Cameroon, among other grievances. Not long after, teachers in the North West and South West regions also went on strike, demanding for the redress of several issues concerning the English system of education.

Things, however, got worst when Anglophones in both regions, who had been fed up with the unfavourable political and economic situation of the country, the use of French

<https://thesunnewspaper.cm/scnc-activists-flee-govt-steps-clampdown-home-abroad/>

1. **Fear grips Bamenda denizens following incessant arrests**

[February 20, 2017](https://thesunnewspaper.cm/fear-grips-bamenda-denizens-following-incessant-arrests/)

Fear grips Bamenda denizens following incessant arrests

By Wambo Emmanuel in Bamenda
After the arrests of some journalists in Bamenda who were later ferried to Yaoundé overnight, most Bemenda denizens and the North West population at large, including media men and women are now living in perpetual fear of being abducted by security officials for something they might have said or wrote.
A good number of journalists or comedians who used to inform the public on current happenings on the ongoing Anglophones crisis have reportedly had their programs cancelled or censored after the visit of the national communication team in Bamenda headed by veteran journalist, Peter Esoka. Recently, the home of one of the female journalist with one of the local radio station in Bamenda was visited over night by security men, allegedly from Yaoundé. Her home was ransacked after she escaped, abandoning her twin babies in the house.
The few Journalists who are braving the storm can be read or heard on air blabbering half truths. Others have abandoned the profession and have resorted to business, farming or just idling around and doing nothing.
Some North West elites, like the Fons, Senators, Parliamentarians and the National Chairman of SDF, Ni John Fru Ndi have raised concerns on the apparent stifling of the press to no avail.
Allegations are also rife that people are now using the Anglophone crisis to settle previous scores. A concerned member of the public told this reporter that “someone just needs to point at you to these security men from Yaoundé as a member of the SCNC or any of the Anglophone pressure groups and the next day you will find yourself in Yaoundé.”
Another person who also opted for anonymity said the fear and paranoia is so great that “To pick a call from either a friend or from a family member who either wants to know the state of the town, one must look left and right before answering. Any call you receive wherein the word ‘ghost town’ is mentioned might land you to Yaounde the next day; at times people’s phones are seized and searched.”

<https://thesunnewspaper.cm/fear-grips-bamenda-denizens-following-incessant-arrests/>

<https://thesunnewspaper.cm/more-scnc-activists-go-underground-amidst-arm-conflict-in-nw-sw-regions/>

1. **Hon. Wirba Joseph has every right to escape – SDF SG.**

[June 1, 2017](https://thesunnewspaper.cm/hon-wirba-joseph-every-right-escape-sdf-sg/)

BY WIFAH JENNYHANS NDE
The Secretary General of the Social Democratic Front, SDF, Senator Jean Tsomelu has revealed that given the circumstances, the Honorable Member of Parliament for Jakiri, Hon Joseph Wirba had every reason to escape from the country.

Senator Jean Tsemolu frowned bitterly at the decision of the Delegate for National Security who issued an arrest warrant against Hon. Wirba Joseph. “We have no problem with any MP of our party, the CPDM and the Biya regime should be asked what they want from Cameroonians, what they want from the people of North West and South West Regions. I am disappointed in the

Delegate for National Security for issuing an arrest warrant against somebody who has immunity. If Ayah Paul who has immunity could be arrested and detained in this state of lawlessness, then Hon. Wirba has every reason to escape. Every human being desires to be free” the SG concluded.
Senator Tsemolu was making the remarks on the sidelines of the National Executive Committee, NEC meeting that held last Saturday May 27, 2017, in Bamenda.
Among many salient issues that were discussed and resolved was the party’s boycott of National Day on May 20, the party’s 27th anniversary which happened last May 26, the party’s Newspaper, SDF Echoes amongst others, were equally some sidelines that might not have been mentioned in their resolutions.
Top of which was the bitter regret from SDF officials against media organs that published information which, according to Denis Nkemlengu, Deputy National Communication Secretary for the SDF to the party, was not authentic. Some of the information that the SDF regretted its publication includes a possible article 8.2 to be slammed on some party officials and mayors.
Speaking to The SUN on this issue, the National Communication Secretary, Madam Anebom Beatrice Munjo said the media should stop creating unnecessary tension among political parties in the country. “I want to say this Cameroon belongs to all of us and the press is the 4th estate of the nation. Before this NEC meeting, the press made all kinds of speculations. Some press organs said we are going to give 8/2 to mayors, Hon. Joshua Osih and so on. I want to plead with the press of this country, we are building, we are not destroying. Help us the political parties build this country”. Madam Anebom furthered.
Quizzed on why the SDF sometimes avoid talking to the press for valuable information, the SDF through her communication unit declined such allegations and claimed they are always available to the public for whatever worry that concerns the life of the party.
The SUN equally sought to know if Mr. Fru Ndi, the party’s chairman is still eligible to stand for presidential elections next year but the party officials swiftly responded that it is left for the National Convention in October for that to be decided but laid claims that the SDF is a democratic party and that its candidate for 2018 shall be selected in the most democratic manner and made known to the public come October this year.
Financial scandals equally characterized the side discussions at the just ended NEC meeting. After numerous reports by some media organs that the SDF has been receiving an annual package of FCFA 6 billion from the government, Senator Paul Hamand told The SUN that, it is no news that government gives grants to political parties in the country but refuted allegations that this money gets into the pockets of the National Chairman. “We have our bank account managed by the finance unit of the party to which our chairman is not even a member. If rumormongers of the Biya regime want to challenge the party’s accountability, they should come and audit us. We are open to it”. Senator Paul Hamand explained.
The meeting that lasted over 10 hours, brought together National executive members of the party, MPs, mayors and regional party heads to clean the house of existing problems, recognize efforts of party militants and set plans for the party’s future wellbeing. At the end of the meeting, resolutions were put forth for public consumption among which are serious concerns about the Anglophone crisis with the SDF maintaining its stand that those abducted and whisked to Yaounde be unconditionally released for peace to reign in the country.

<https://thesunnewspaper.cm/hon-wirba-joseph-every-right-escape-sdf-sg/>

1. **NW, SW courts still grounded after May 2 deadline**

[May 15, 2017](https://thesunnewspaper.cm/nw-sw-courts-still-grounded-may-2-deadline/)

BY TALLA AGHAA CHRISTOPHER
Courts in the North West and South West regions still remain grounded despite calls by the President of the Cameroon Bar Council, Barrister Ngnie Kamga Jackson for the Common Law lawyers to resume work. Barrister Ngnie Kamga had in a meeting with some 20 Senior Common Law Lawyers drawn from the North West and South West Regions in Buea on April 8, 2017 resolved that Lawyers will suspend their strike action and resume effective work on May 2, 2017. But till date, courts are still paralysed.
When The SUN visited the Meme High Court holden in Kumba, the cause list comprising of criminal and civil matters for the day were pasted on the notice board of the various courts but the sessions were going on with just the government bench represented. The Bar was empty.
Litigants complained that they came with the hope that Lawyers have suspended their strike action as announced over state media. One of the litigants who spoke to The SUN on conditions of anonymity said that he first made a stopover at his lawyers’ chambers before coming to court but the lawyer told him that it will take a long time for lawyers to resume work considering the present dispensation.
The Sun reached his lawyer for a comment and he said: “the order calling off the strike by the President of the Bar Council is very much okay, but why should we resume work when those we mandated to announce the strike action are still incarcerated and others on the run? When they shall be released and those on the run are back for frank dialogue to continue with the powers that be then effective work will commence.”
This Reporter realised that even some of the Lawyers who attended the Buea conclave with the Batonnier are still to appear in court. A cross section of Kumba-based Lawyers The SUN spoke to asked why they should resume work when the leadership of the Constituent Association of Cameroon Common Law Lawyers made up of .Barristers Harmony Bobga-Mbuton, Agbor Felix Nkongho Balla ,Eyambe Elias Ebai, and Ngangjoh Sopseh Emilien presidents of North West Lawyers Association, NOWELA, Fako Lawyers Association, FAKLA, Meme Lawyers Association, MELA,and Manyu Lawyers Association, MALA, whom they jointly mandated to speak on their behalf have been arrested and others on the run.
“We have asked government to release our leaders and others who have been detained because of the Anglophone Crisis but government is playing for the gallery”, the Lawyers opined.
Quizzed on whether the recent concessions made by the powers that be on the professional demands of the Lawyers is not enough for the Common Law Lawyers to call off the strike, the Lawyers saluted the government for what she is doing but hinted that they need to see effective implementation of the Head of State’s instructions as announced by the Minister of Justice and Keeper of the Seals.
One of the Lawyers disclosed that he is ready to go to work but questioned the whereabouts of his wig and gown that were seized by forces of law and order during the common law lawyers peaceful demonstration in Buea in November 2016.

<https://thesunnewspaper.cm/nw-sw-courts-still-grounded-may-2-deadline/>

1. **Biya summons Higher Judicial Council of high stakes June 7, 2017**

[May 15, 2017](https://thesunnewspaper.cm/biya-summons-higher-judicial-council-high-stakes-june-7-2017/)

By DOH JAMES SONKEY IN YAOUNDE
The Higher Magistracy Council will hold at Unity Palace next June 7, 2017 to examine disciplinary files, the promotion of magistrates, the transfer and posting of magistrates for the years 2015, 2016 and 2017 and submit to the President of the Council, Paul Biya for final decision. The body was summoned last May 12, 2017 by its Chair, President Paul Biya. To hold within a particular context marked by judicial reforms introduced by the government to solve preoccupations raised by Anglophone lawyers in the country, this session will certainly not ignore the Ayah Paul Abine’s case, a super scale magistrate arrested as a sitting attorney general at the Supreme Court at the dawn of the Anglophone crisis. His arrest raised a lot of criticism from lawyers who argue that it was in total violation of the laws of the land.

The President of the Republic, Paul Biya who is said to be bent at giving lasting solutions to preoccupations raised by Anglophones during the socio-political unrest may go the extra mile as he promised to appease his sons and daughters of the North West and South West Regions for real peace and unity to prevail in the country.
As revealed in one of his outings, Minister of State, Minister of Justice and Keeper of the Seals, Laurent Esso said President Paul Biya had ordered for survey to be carried out once again on the judicial needs of the two Anglophone regions of the country ahead of a redeployment of magistrates certainly after the announced Higher Judicial Council session.
The Higher Judicial Council that handles the careers of magistrates and higher judicial officers lastly met on December 18, 2014 to examine disciplinary files, the promotion of magistrates, the transfer and posting of magistrates for the years; 2012, 2013 and 2014.

<https://thesunnewspaper.cm/biya-summons-higher-judicial-council-high-stakes-june-7-2017/>

1. **Bamenda Ecclesiastical Province creates fund for victims of violence**

[October 17, 2017](https://thesunnewspaper.cm/bamenda-ecclesiastical-province-creates-fund-victims-violence/)

By WIFAH J. NDE
The Bamenda Ecclesiastical Province has announced the creation of a fund to support those affected by the violence during demonstrations in the Anglophone regions of the country.
The announcement was made by the Auxiliary Archbishop of the Bamenda Ecclesiastical Province, Michael Miabesue Bibi on Saturday October 14, 2017 during a mass to pray for those who have lost their lives during the Anglophone crisis.
The Auxiliary Bishop asked Christians to pray for all those who shot others to death and those who ordered for their shooting. Without stating clearly the angle of this prayer request, the prelate emphasized that, “Only God gives life and only God should take lives”.

The church which is the moral pillar in every society has continually played her role since the start of the Anglophone crisis as a mediator and the broker of peace for all, by looking at the evolution of Cameroon history objectively and making pertinent suggestions to government on the way forward.
It is based on this fall out that the Archbishop of the Bamenda Ecclesiastical Province, His Grace Cornelius Fontem Eshua chose Saturday October 14, 2017 for all churches under his command to pray for the repose of scores of people who lost their lives during recent demonstrations in the NW and SW regions and to pray for the country as a whole.
In a solemn homily at the Bamenda Metropolitan Cathedral where hundreds of Christians answered present, officiated by the Auxiliary Archbishop, Michael Miabesue Bibi, the church unanimously prayed for the peaceful repose of the lives of those who died since October 2016 in connection with the Anglophone crisis. Prayed as well for those who have been arrested and tortured, both known and unknown and for the families of all those affected.
During his homily, the Auxiliary Archbishop called on Christians to pray for this nation like never before at a time when uncertainty is the next certainty in the Northwest and Southwest regions.
He cautioned all, Christians like non-Christians to keep away from trouble, calling on them not to provoke the military or give room for the military to provoke them while warning that “life is sacred”.
The man of God did not fail to re-echo the stance of the church with regards to the Anglophone crisis. He condemned strongly the abduction of Anglophones to unknown destinations and called on government to put an immediate stop to the arrests.
He equally urged government to push fast for a genuine and inclusive dialogue so as to find lasting solutions to issues affecting national peace.
Finally, the prelate appealed with the population to continue offering masses to pray for the lives of those who were killed during the Anglophone crisis.

<https://thesunnewspaper.cm/bamenda-ecclesiastical-province-creates-fund-victims-violence/>

1. **Many SCNC activists still in detention after October 1 arrests, killings**

[October 10, 2017](https://thesunnewspaper.cm/many-scnc-activists-still-detention-october-1-arrests-killings/)

**By Simon Ndive Kalla**

Many activists of the Southern Cameroons National Council, SCNC, and supporters of other pro-independence movements are still in detention following widespread arrests and killings in the North West and South West regions as thousands thronged the streets on October 1, 2017 to proclaim what they termed the independence of Southern Cameroons which they now call Ambazonia.

The long-lingering Anglophone crisis took a turn for the worst last week when activists operating under the aegis of the Southern Cameroons Ambazonia Governing Council called for public demonstrations. The mass protests were scheduled to culminate in celebrations on October 1, 2017 the day activists had hoped to declare the independence of Southern Cameroons/Ambazonia, a country they clamour to create. They consider October 1 as the independence day of the self-proclaimed Republic of Ambazonia.

Following up on clashes on September 22, protesters again poured out on the streets on October 1 in villages and towns across the North West and South West regions. Their attempts to hoist blue-white flags of Southern Cameroons/Ambazonia as a sign of independence were met with stiff resistance by armed forces deployed to the troubled regions.

Amnesty International confirmed up to 17 people being killed by security forces during protests in some Anglophone towns. Security forces opened fire on protesters in Bamenda, Buea and several other towns. The killings took place despite a call for restraint made by the UN secretary general.

Many people were rounded up by security forces and flung into detention cells where they are said to be held under inhuman conditions. Many others, who slipped through the police dragnet, have been fleeing as government has stepped a manhunt for them.

A case is Ngwa Fidelis Azefor, Elizabeth Namomdo Lyonga, Fru Pius, Ngufor Cornelius Ticha, Teke Asonganyi Nalova Justine, Peter Che Nji, Martha Ngam Chia, members of the SCNC, who took part in the march that was staged in Buea on that fateful day, October 1, 2017. The protesters in Buea, over 600 of them among whom was Teke Asonganyi Nalova Justine, began marching from Mile 17 towards the governor’s office and had as destination the Prime Minister’s lodge. They carried peace plants and placards with messages denouncing the government of Cameroon for marginalising Anglophones. Some of the messages read; “leadership is accountability”, “we need equal treatment to both Anglophones and Francophones” “We are tired of marginalisation”, “we want separation”, among others.

However, somewhere around Molyko, the protesters were intercepted by gendarmes and policemen who shot into the crowd and sprayed teargas to disperse the marchers. While some were killed, many arrested, others escaped.

The whereabouts of Teke Asonganyi Nalova Justine and other ringleaders of the Buea protest are not known, but if apprehended she and her accomplices will be tried under the anti-terrorism law whose maximum sentence is the death penalty.

**Origin of crisis**

It is also worth recalling that the Anglophone crisis, something that pundits say had been brewing for several years, boiled over in November 2016, when Common Law Lawyers in the North West and South West regions went on strike. They were demanding for the return of the federal system of government, redeployment of Civil Law Magistrates back to Civil Law Courts in French Cameroon, among other grievances. Not long after, teachers in the North West and South West regions also went on strike, demanding for the redress of several issues concerning the English system of education.

Things, however, got worst when Anglophones in both regions, who had been fed up with the unfavourable political and economic situation of the country, the use of French as the dominant and official language, and the marginalisation of the Anglophones, joined the strike.

While the Anglophone crisis continues to escalate, International Organisations and other Western powers have called on the Government to address the root cause of the crisis through dialogue.

<https://thesunnewspaper.cm/many-scnc-activists-still-detention-october-1-arrests-killings/>

1. **October 1 killings Condemnations pour in from across the world**

[October 10, 2017](https://thesunnewspaper.cm/october-1-killings-condemnations-pour-across-world/)

– Stop the ‘bloodbath and genocide’, Anglophone Bishops tell Biya
– We denounce all forms of injustice, torture, violence and killing – CBC

By Elah Geoffrey Mbongale
The Cameroon Baptist Convention on Friday, October 6, 2017 joined the
Bamenda Provincial Episcopal Conference [BAPEC] to condemn violence perpetrated by government forces on the population of the North West and South West regions of Cameroon on September 22 and October 1, 2017.
This comes on the heels of numerous international bodies and states including the United Kingdom, the USA, the UN, the Commonwealth, the Francophonie and UNCHR condemning same violence after government failed to heed to calls for restraint during the two massive demonstrations on September 22 and October 1 in the two English speaking regions of the country.
In a statement released on Friday, The Cameroon Baptist Convention said: “We strongly denounce all forms of injustice, torture, violence and killing, irrespective of who the perpetrators are. Based on our belief in the sanctity of life, no one has the right to take the life of another except God…”
This follows an earlier statement from the Bamenda Provincial Episcopal Conference on Wednesday, October 4 where the prelates gave a vivid synopsis of the recent happenings and said:
“We condemn in the strongest terms possible the barbarism and the irresponsible use of firearms against unarmed civilians by the Forces of Law and Order, even if they are provoked. The divine injunction: “Thou shalt not kill!” remains valid even in such circumstances. We call on the Head of State of the Republic of Cameroon, the Commander in Chief of the Armed Forces, to stop the bloodbath and genocide that has skilfully been initiated in the North West and South West Regions.”
The communiqué also indicted the Minister of Communication, government’s spokesperson for blatantly telling lies to the nation either because he was not adequately briefed or because he deliberately wanted to manipulate public and international opinion.
“We also note, with embarrassment and shame, that the Minister of Communication has praised the professionalism of the Armed Forces, in total disregard of the fact that some of the heinous acts of brutality and barbarism meted out to the populations were by some members of the same Armed Forces. Either the Minister of Communication was not adequately informed or he was misleading the national and international communities.
“The enthronement of lies, no matter from which side in our country, does not help in nation building. It rather destroys the efforts of honest and God-fearing Cameroonians who truly seek to be free and responsible, not only for themselves but also for others and for their environment. Today, at least in the North West and South West Regions of Cameroon, there is a huge gap of credibility between the population, those calling for restoration and the administration.”, the statement reads in parts.
UK, joins US, UN Francophonie, CommonWealth etc
Earlier, The United Kingdom on Thursday joined the United States of America to condemn violence perpetrated by government forces on the population of the North West and South West regions of Cameroon on October 1st.
The United Kingdom called on both the government and Anglophone population to dialogue and address the root causes of the problem.
According to the US State department, Cameroonian government’s use of force to restrict free expression and peaceful assembly, and violence by protestors, are unacceptable.
The State department has also condemned internet cut in the regions and urged the government to respect human right and freedom of expression.
Since last month, the US embassy in Yaoundé has issued a series of security messages warning citizens of unrest in Cameroon’s Anglophone regions.
On October 04, 2017, The Chairperson of the African Union Commission, H.E. Moussa Faki Mahamat, expressed deep concerns by the deteriorating security situation in the North-West and South-West regions of Cameroon.
The Chairperson expressed condolences to all affected persons and families and calls on all stakeholders to exercise restraint in their pronouncements and to refrain from further acts of violence.
The Chairperson of the Commission reiterates the African Union’s commitment to support the efforts of the government and people of Cameroon towards a peaceful settlement of the crisis through inclusive and meaningful dialogue and national reconciliation.
The Chairperson of the Commission reaffirms the commitment of the African Union to promote peace and stability in Cameroon, in line with its relevant instruments that consecrates the principle of the intangibility of African Borders as they existed at Independence and other relevant AU instruments.
In a statement attributable to the Spokesman for the United Nations Secretary-General on Cameroon, Stéphane Dujarric said the Secretary-General remains deeply concerned about the situation in Cameroon and strongly condemns the acts of violence reported in the South-West and North-West regions of the country on 1 October, including reported loss of life. He calls on the Cameroonian authorities to investigate these incidents and urges political leaders on both sides to appeal to their followers to refrain from any further acts of violence, and to unequivocally condemn all actions that undermine the peace, stability and unity of the country.
The Secretary-General takes note of the calls by the authorities for dialogue and encourages representatives of the Anglophone community to seize the opportunity in their quest for solutions to the community’s grievances, within the framework of the Cameroonian constitution.
The Secretary-General reiterates the support of the United Nations for such efforts, through the United Nations Regional Office for Central Africa (UNOCA).
Other individuals have also raised their voices against the killings and voilcence witnessed recently in the Anglophone part of the country.
Citizens speak up
Media business mogul, Bony Dashaco released a statement earlier saying “I write to firmly condemn all forms of violence our brothers and sisters in the North West and South West regions have been subject to, in the past nine months. The casualty, the loss of lives, material damages is unacceptable in this day and age…”
Human rights lawyer and President of the outlawed Cameroon Anglophone Civil Society Consortium, Barrister Nkongho Felix Agbor Balla in a statement released on Saturday, October 7 captioned ‘We Decry Anglophone Intimidation, Abuses and Looting by Forces’ said “We condemn with all energy, these acts of barbarism, irresponsible and unprofessional acts by the military. It is the duty of every soldier to protect, respect and defend every citizen.
Other Cameroonians including the former Bar Council President, Barrister Akere Muna and CPP National President, Edith Kah Wallah have equally condemned the violence in the two English speaking regions of the country and called for inclusive dialogue to address the root cause of the Anglophone crisis.
It should be recalled that the North West and South West regions have been plagued by socio political crisis for almost a year now, characterised by schools boycott and ghost towns.
This was after Anglophone lawyers and teachers went on strike to decry the perceived marginalisation of Anglophones and the infiltration of francophones into their respective cores.
The professional strikes were later hijacked by a cross section of the Anglophone population for what they termed a systematic marginalisation by the Yaounde government.
Things turned sour after the lawyers and teachers who were in negotiation with government were later arrested and charged with terrorism related crimes, others fled the country and are still in exile.
On September 22, 2017 Friday, 22nd September 2017, Following weeks of propaganda and a call by different groups and persons, most of whom have taken refuge outside the country and who are advocating for the restoration of the independence of West Cameroon, a huge population of men, women, youths, old and young, and even children turned out on the streets of many towns and villages of the North West and South West Regions to demonstrate peacefully and express their right to self-determination. A few deaths and arrests were recorded.
Things came to a head on October 1, 2017 when, in an attempt to prevent the programme of the restoration of independence on 1st October 2017 by the leaders of these groups, the Government declared a curfew in the North West and South West Regions from midnight on Friday, 29th September to midnight on Monday, 2nd October 2017.

<https://thesunnewspaper.cm/october-1-killings-condemnations-pour-across-world/>

1. **Bloody October 1st in the NW, SW**

[October 3, 2017](https://thesunnewspaper.cm/bloody-october-1st-nw-sw/)

-Scores reported death during clash with security forces
-Activist dribble forces, declare ‘independence’
-Black magic displayed by some protesters during confrontations
-Biya tweets from abroad as activists bleed from bullets

By ELAH GEOFREY MBONGALE, ATIA TILARIOUS &                            WIFAH JENNYHANS NDE

Sunday, October 1, 2017 will be emblazoned in the minds of Cameroonians of English speaking extraction of the North West and South West regions as a bloody one. A planned peaceful demonstration quickly turned violent when protesters met with stiff resistance from the military, leaving more than 20 dead, several wounded and more than a hundred arrested.
The security measures were strict and binding, but believers in the restoration of the statehood of the former Southern Cameroons gave a blind eye. They dared the military that had been called in to foil October 1 demonstrations.
The demonstrations were called by the Southern Cameroon Ambazonia Governing Council, a structure created by Anglophones in the Diaspora to ensure the restoration of the state of

The demonstrations were also intended to hoist the Ambazonia flag at strategic location, including the palaces of traditional authorities as a symbolic declaration of independence.
The morning of October 1 witnessed relative calm across the Northwest and South West regions although security officers were stationed at strategic areas in the regions.
This was in line with gubernatorial orders signed on Thursday, September 28 and Friday September 29, 2017 by the governors of the South West and North West regions respectively banning the movement of persons and motorbikes, interurban movements, closure of maritime and land borders and a prohibition on persons not to group themselves in numbers exceeding four.
The docile atmosphere suddenly got dark and tense before midday across the Anglophone regions as thousands of activists and demonstrators emptied themselves into the streets carrying peace plants and chanting freedom songs to celebrate what they termed the restoration of the independence of Southern Cameroons.

The people of Nkwen took to the streets in hundreds, and were dispersed  with water cannons and teargas. They regrouped and resurfaced after calm which became a hide and seek game between the security forces and civilians. Before long, it became a huge crowd that over powered the security forces to march to the Fon’s palace at mile 4, Nkwen where “Ambazonian” flags were hoisted.
At press time, there were rampant gunshots from security forces around the Nkwen neighbourhood, huge mobilization of the population marching towards the Independence Square, known as City Chemist. The SUN gathered that, tyres were burnt around the City Chemist neighbourhood, Redezvous and those around Travelers were put under house arrest.
In Kumbo where the central prison was reportedly on fire, Four of the prisoners who attempted escape were shot dead, protesters equally took to the streets there and hoisted flags.
5 were reported shot dead in Ndu, Donga Mantung Division but things got twisted as civilians allegedly seized the gun of a gendarme officer and forced the company commander, the DO and 26 gendarmes to flee.
In Ndop, one person was shot death while another is recovering from injuries.
At Nchuabuh, a quarter in Mankon, 3 people were shot and were rushed to the hospital by the population where they are presently responding to treatment. While this was happening, the “Ambazonian” flags were being hoisted at the Mankon Fon’s palace and the “Ambazonian” anthem sung.
Three elements of the Rapid Intervention Batallion, BIR who visited the scene were intimidated by the population and they took to their heels for reinforcement.
Through the mayor of Bamenda II, Ballick Awa Fidelis, the Fon of Mankon sent these words “the Fon supports you and acknowledges your efforts. Continue the struggle or celebration but the fon would not like to hear of bloodshed”.
As tension continued into the later part of the day, it was gunshots that met with the mobilized population of Bafut who had hoisted flags at the Fon’s palace and Nsani, the main square of that locality.
According to reports from our correspondent, Wambo Emmanuel who filed in from the forest in Bafut,  it was a bloody confrontation between the irate crowd and police officers. As recounted by our correspondent, after the crowd had successfully hoisted the “Ambazonian” flags at the Fon’s palace and Nsani squares adding to another that was hoisted since September 22 on a tree in a market shrine, these youth marched to the police station to order for the release of some of those who had been arrested and their confiscated bikes when the police opened fire on them. In Bafut, several persons were wounded from gunshots but none died.
There were gunshots and teargas in the air throughout the night in neighbourhoods like Rendezvous, Travellers in Bamenda.
The population of Bafut accused the security officers of looting stores and stealing livestock during the raids.
Some of the security officers were seen consuming the liquor they looted from some bars Monday morning.
The battle for Buea
In the South West Region, While Limbe succumbed to heavy military presence and deserted the streets, a huge crowd of demonstrators, largely youths, marched up from Mutengene, despite military impediments, towards Buea, the regional capital and erstwhile capital of the former Southern Cameroons.
The crowd gradually grew in size as it soaked in more people along the way. Youth from Mile 14, 16 joined in and met up with others from Muea at the Mile 17 Junction, main entrance into Buea. Despite teargas, flash bang grenades and gunshots, the crowd forged on towards the governor’s office.
The police mounted several blockades to prevent the protestors from moving up but they were dribbled by some witty demonstrators who took shot cuts through residential neighbourhoods to hoist the Ambazonia flag around Bongo Squares.
Some scenario repeated itself across the South West regions, In kumba, four people were reportedly killed by security forces while others sustained injuries from gunshots. Two security officers are also said to have sustained injuries.
In Ikiliwindi, Tombel, Bangem Menji, Mamfe, Teke and other areas, protester defied the odds to hoist the Ambazonia flag at strategic locations, including palaces of traditional rulers.
The Sun is yet to get the final death toll from the October 1, 2017 demonstrations but unofficial reports put it above 20 persons.
Security forces have been accused of siezing the corpses of those killed, making it difficult to get the real toll.
Black magic demonstrators
The Sun also got reports that some of the leaders of the protests had solicited the services of native doctors to get charms to protect them against bullets. In Kumba and Mamfe, The Sun learned that some guys purporting to have those charms confronted security officers who took to their heels after bullets didn’t penetrate the Odeshi(name for someone who can’t be penetrated by a bullet) guys. The Sun can however not independently confirm these claims.
Another internet shutdown
It should be noted that prior to the gubernatorial orders prohibiting the movement of persons, the government had restricted internet access in the two English speaking regions. The internet was finally shutdown late Sunday.
This is the second time government is shutting down internet in the North West and South West regions as a result of the Anglophone crisis. Earlier this year, internet services were suspended in the two regions for almost three months.
Sunday’s confrontations came on the heels of a statement from the United Nations Secretary General calling on both parties to exercise restraint and not indulge in violence. The UN chief called on the government engage in inclusive dialogue to solve the root cause of the crisis.

<https://thesunnewspaper.cm/bloody-october-1st-nw-sw/>

1. **Schools resumption picks up momentum in Kumba**

[October 10, 2017](https://thesunnewspaper.cm/schools-resumption-picks-momentum-kumba/)

By DANIELA NEBA NGUM
The Divisional Delegate for Secondary Education Meme, Aghim Abunaw Obase has disclosed that pressure on teachers that stems from the Anglophone crisis has gradually died down as the population of students kept increasing day after day.
Mr. Aghim Abunaw was speaking at the Kumba City Council grandstand on October 5th during celebrations marking the 24th edition of the International Day of the Teachers.
The ceremony that saw a huge turnout of teachers was presided at by the Senior Divisional Officer for Meme, Chamberlain Ntou’ou Ndong and was celebrated under the theme: “Teaching in freedom, empowering teachers”.
According to the delegate, at the wake of the Anglophone crisis that kept schools deserted, there was so much pressure and threats on teachers and school administrators from unidentified individuals who are against the resumption of schools.
The situation, he said, has died down as most parents have realized the need to send their children to school.
“The pressure on teachers has gone down since the population in schools is increasing day by day following the statistics of principals”, the Delegate noted.
He was corroborated by the Meme Divisional Delegate for Basic Education, Sabas Atem who noted that the academic year started timidly in the basic sector though it is gradually gaining grounds.
Talking about rural areas in the division, the Delegates said rural areas for sociological reasons have a different dynamics with the cosmopolitan and so with continuous sensitization, they hope schools will resume effectively there.
Delegate Abunaw further refuted rumours that teachers showed up for the celebrations in order to protect their salaries. He noted that the celebration is based on the recognition that societies places on the role teachers have been playing for ages.
He further frowned on teachers who abandoned their jobs for greener pastures abroad thereby leaving the students frustrated.
He however appealed to parents to send their children to school in order to secure a better future for them
“We are using the International Day of Teachers to appeal to parents of Meme Division to see the need to send their children to school. We think that every other thing maybe wrong but we shall not do the last one by killing the same children we think we are fighting for”, the delegate noted.
On his part Meme Senior Divisional Officer, Chamberlain Ntou’ou Ndong said the day is set aside for teachers to take stock and reflect on their activities and quality of services rendered.
The SDO further urged teachers in the division to fight against vices in the educational milieu such as indiscipline, laziness, absenteeism and bribery and corruption.
Mr. Ntou’ou Ndong noted that the celebration challenged the thoughts of many who thought that schools would not effective in the division.

<https://thesunnewspaper.cm/schools-resumption-picks-momentum-kumba/>

1. **Agbor Balla breaks the silence -Urges President Biya to embrace Dialogue**

[September 26, 2017](https://thesunnewspaper.cm/agbor-balla-breaks-silence-urges-president-biya-embrace-dialogue/)

By Ikome Christie-Noella Eposi
The head of the Fako lawyers Association (FAKLA), Barrister Agbor Balla Felix has called on the president of the Republic of Cameroon, His Excellency Paul Biya and his government to dialogue constructively with Cameroonian citizens in order to find long lasting solutions to the ongoing Anglophone marginalization. The former Anglophone detainee released the above statement to the press after a thanksgiving service organized at the Presbyterian Church Buea station to thank God for the release of some of the detainees by the President.
The Rev. Ekum Manfred drew his inspiration from Psalms 34:1-7 to deliver a sermon on the theme: “Thanking God in times of Difficulties”.
Rev. Ekum told worshippers to always and in all circumstances give thanks to God Almighty for all what happens to us.
“A lot has gone wrong in the society, the end time is near, so much evil and wickedness, some men of God have become money chasers and business mongers, the Anglo-Saxon culture has been raped and defiled, a lot has turned up-side-down,” the parish pastor of PC Buea Station said.
The reverend in his homily recounted all the highlights of the Anglophone crisis, its causes and effects. He summed the entire happenings when he said, “The rains fell before the clouds gathered. A lot of water went under the bridge.”
Rev. Ekum, like Agbor Balla, paid glowing tributes to all those who lost their lives in the course of the crisis and prayed that their souls should rest at the bosom of God Almighty.
Explaining why he had to recount the Anglophone crisis from alpha, the man of God said, he did so to show God’s intervention in it all. Reasons why the released detainees are strong and healthy after 8 months in jail and have come back to give God thanks and praises.
“If you want a place in the Sun, you must have blisters” he said.
“Where there is no vision, the people perish. We must be united and stand strong (Psalm 133:1). We cannot make omelets without making eggs but we cannot also break and burn down places because we want to fry eggs. We need to initiate constructive dialogue and not solve problems through violence or war. Our country is sick and we must find solutions to the sickness”. Rev Manfred pinpointed.
Continuing with the mighty sermon, Reverend Pastor Ekum urged the released detainees and all the Christians to look at the people who are behind and not those in front. “It is not what they have taken from you that count but what you have left that matters” he said.
Rev. Ekum’s message to government
He called on the government to eschew bitterness and listen to her people and release those still in detention. He equally called on all the ghosts to return to their graveyards and everything should move on smoothly. “We should repent and reconcile with one another for the good of tomorrow. Dialogue and understanding are vital instruments”. “Lord make us instruments of peace” he concluded.
Alongside the thanksgiving service, child presentation, monthly thanksgiving and the sacrament of the Holy Communion characterized the church service.
Addressing the Christians and giving his first public statement after their release, Barrister Nkongho Felix Agbor Balla thanked everyone who in their various capacities stood by them and helped them financially, spiritually and morally while they were in jail for 8 months. He expressed his sincere condolence to the families and friends of those who were shot and killed on Friday September 22 2017. He noted that their intention has never been to incite violence and create problems but rather to fight against injustice in the judiciary system and the systemic and sustained marginalization of the Anglophone minority in Cameroon.
He pleaded the remaining Anglophone detainees be released as soon as possible and everything should move on smoothly. Barrister Felix Balla said 8 months spent in jail has really not been easy but it has helped reinforce his beliefs and quest for justice and fairness. “I remain more than ever committed to stand alongside my community and my people in the face of adversity.
He ended his lengthy but enriching speech condemning the violence perpetrated by some unscrupulous individuals in the burning down of schools and public and private property. “The struggle is a peaceful one and requires peaceful measures. I believe in fighting injustice and the marginalization of the Anglophone minority is right and it is time to do right”….. He stated.
Godden Zama, one of the freed detainees expressed his sincere thanks to all especially family members and friends who supported him while in jail. He prayed that God richly bless everyone.

<https://thesunnewspaper.cm/agbor-balla-breaks-silence-urges-president-biya-embrace-dialogue/>

1. **Barrister Akere Muna calls for sincere dialogue after Friday’s demonstrations**

[September 26, 2017](https://thesunnewspaper.cm/barrister-akere-muna-calls-sincere-dialogue-fridays-demonstrations/)

By Elah Geoffrey Mbongale
The former president of the Cameroon Bar Association has denounced government’s mismanagement of the Anglophone crisis, which resulted in massive demonstrations on Friday across the North West and South West regions.
In a video posted in two versions (French and English) on his official Facebook page, the former President of the Cameroon Bar Association, Barrister Akere Muna, holds the Government responsible for the tensions that are exacerbating in the Anglophone regions.
He released the videos a day after the Friday, September 22, 2017 mass demonstrations in most of the localities of the Northwest and Southwest regions and the explosions of improvised explosive devices in Bamenda and in Douala.

“I am talking to you at this late hour from my office, deeply saddened by the news that circulates on social networks and in the press concerning the events taking place in the North-West and South-West regions and in Douala. This is what happens when a government refuses to listen to the people. All the Cameroonians who saw these images surely noticed the peaceful reply of those who went down the streets, “he said at the beginning of his speech.
He said he was all the more saddened by reports of loss of lives following these demonstrations. “Like many other Cameroonians, from the beginning of the 1990s, I have recently insisted on the imperative nature of a sincere dialogue. Unfortunately, the Government’s response has been repression, cosmetic reforms. Teachers, lawyers who have expressed their legitimate concerns have been arrested or forced into exile. Physicians who only demanded dialogue were subjected to disciplinary transfer, humiliation. It is regrettable that the Government has not learned anything from the past and a party which has produced no result, ” Barrister Akere Muna lamented.
He also decried the pseudo multipartism and a “decentralization still awaited after more than two decades”.
“The people can no longer believe in their government. The youth are facing an uncertain future. In the immediate future, a genuine dialogue is needed. But before that, the rest of all those who have been arbitrarily detained must be released and also the real conditions must be put in place for the return of Cameroonians exiled abroad. For the success of genuine dialogue, the people must be at the center of all concerns. So that your concerns are taken into account, it is essential that your spokespersons or representatives come from those who live with you and understand your situation, “he advised.

<https://thesunnewspaper.cm/barrister-akere-muna-calls-sincere-dialogue-fridays-demonstrations/>

1. **Ghost towns ‘enforcers’ now target NW CPDM bigwigs**

[June 27, 2017](https://thesunnewspaper.cm/ghost-towns-enforcers-now-target-nw-cpdm-bigwigs/)

By WAMBO EMMANUEL IN BAMENDA
The wave of violence resulting from the fallouts of the Anglophone crisis seems to be turning its tide towards bigwigs of the ruling CPDM party in the North West region.
Two vehicles belonging to Mezam II A section president, Anye Cletus Matoya and that of the CPDM section president for Ngi in the Momo East were torched recently. This has stoked fear in the ranks of the party as no one is sure of who might be the next victim. Even though the police are yet to identify who these arsonists are, a host of the CPDM elite from across the region are pointing an accusing finger at some secessionist aiming to eliminate the CPDM party in the northwest region.
Though the subject of numerous threats and the recent burning of his cars, the Mezam II A CPDM section president, Anye Cletus Matoya, says he has not been cowed. He maintains that Cameroon is one and indivisible and as a nation that is practicing multi-party politics, people should be allowed to exercise their freedom of choosing which party to belong to. He noted that as section president of a ruling political party, the CPDM, he has nothing against the people but encouraged them to join his party that was born in Bamenda.
“Those who are fanning the flames of hatred and encouraging these acts of arson for whatever reason should be ruled out”, He warned. He called on supporters of the party in the Mezam II A section not to panic because of what happened to him.
Even though his comrade of Momo- Ngi section shared a similar sentiment after his car was also torched, some comrades in Momo-Ngi think that despite their sacrifices for the party, they are yet to be compensated for their efforts. They said they have never been given the opportunity to have a parliamentarian, mayor or senator.
The elites equally regretted the fact that they give all the support to the CPDM party but still have to travel on very deplorable roads to get from the divisional head quarter to the subdivision.

<https://thesunnewspaper.cm/ghost-towns-enforcers-now-target-nw-cpdm-bigwigs/>

1. **Nation holds its breath as GCE exams take-off**

[June 12, 2017](https://thesunnewspaper.cm/nation-holds-breath-gce-exams-take-off/)

By Elah Geofrey Mbongale and Wifah Jennyhans Nde
As the heat of the Anglophone crisis continue to bellow, most Cameroonians especially those in the North West and South West regions of the country – the two regions directly hit by the crisis, have their fingers crossed as the General Certificate of Education, GCE exams take off on Monday, June 12.
The serious security challenges cloaking the English speaking parts of the country coupled with the fact that most schools have been shutdown since November 2016 presents a bleak picture for the successful organization of the GCE.

It should be recalled that it was only on May 13, 2017, after about five months of no classes that the Catholic Education Authority, following instructions from the Archbishop of the Bamenda Ecclesiastical Province, Archbishop Cornelius Fontem Esua, asked the administrators of catholic schools to open their doors for GCE candidates to access their centers and sit in for this year’s session of the exams. Other schools have had some timid attendance and classes have been ongoing but a good number of schools have not had a single class since the beginning of the crisis in the North West and South West regions.
Generally, some principals, especially those of government schools have revealed that the practical part of the exams unfolded successfully with no major hitches but for the student who suffered an attack from unknown vandals around GBHS Bamenda and her hand badly wounded while on her way to sit in for the B.E.P.C exams. A principal however expressed worries over the turnout of candidates at this year’s GCE exams as the numbers keeps dwindling every day.
For security reason, some centers have been earmarked to host this year’s GCE and the time for the afternoon session has been changed from 2pm to 1pm so that by 4pm, all centers would have finished writing for the day. Without mentioning centres that shall host candidates this academic year for security reason, some centres shall accommodate up to 20 schools and above.
In modification of the minister’s instruction that any student willing to write the GCE even without prove of registration should be given the chance to write, it has been resolved that registration continuous and shall stop when the written part of the exams begin. This was affirmed to The SUN by Mr. Bainjong Ezikiel, divisional delegate of secondary education for Momo.
The SUN equally gathered that candidates who present receipt of registration at any center should be allowed to write. Candidates are also permitted to go to writing centers without uniforms.
The number of centres in the North West region has been drastically reduced this year such that candidates who used to leave Akwaya to write in Guzang for example must now have to bear extra cost to move to Batibo where most of the centers have been concentrated. The move according to the Divisional Delegate of Secondary education is such that with the limited financial resources and security personnel, the security of all candidates can be assured.
It should be recalled that the practical part of the 2017 General Certificate of Education, Ordinary and Advanced level examinations, were written on Monday May 15, 2017, all over the national territory with centres in the North West and South West regions under tight security.
It could be noticed that there was a good number of forces of law and order present in and out of the campuses, alongside the schools’ own security men.
According to the Fako Divisional Delegate for Secondary Education, Helen Ikundi, despite the poor turnout of students, the security measures taken were quite impressive: “We have security men at the level of the schools and security forces allocated by the administration so that the exams go on hitch free. And we can say that the exams went on smoothly.”
It is expected that government will ramp up security during the written part of the GCE in both the North West and South West regions considering the recent spades of attacks on schools infrastructure and some students preparing to write the exams.

<https://thesunnewspaper.cm/nation-holds-breath-gce-exams-take-off/>

1. **Outlawed Consortium disowns Agbor Balla – Barrister Nkongho Felix Agbor Balla says the body is Illegal**

[November 7, 2017](https://thesunnewspaper.cm/outlawed-consortium-disowns-agbor-balla-barrister-nkongho-felix-agbor-balla-says-body-illegal/)

By Elah Geofrey Mbongale
The Cameroon Anglophone Civil Society Consortium, CACSC, popularly known simply as The Consortium, created in the wake of the ongoing Anglophone crisis in the country has disowned its president, Human Rights Lawyer, Barrister Nkongho Felix Agbor Balla.
In a communiqué released on social media, the body, amongst other things, accused its president of treating and trading The Consortium as his personal property and acting alone or making social media outings without consultating The Consortium as a body.

In the communiqué signed by eight members of the body including; Tasang Wilfred, Barrister N.G. Andang, Mawum Fuh J. Che, Ndeh Frederick Nifang, John Mbah Akuro, Tse Anye Kevin, Tata Donald and Prince Akere Divine, Barrister Agbor Balla was also accused of “making catastrophic, damaging and overt utterances in the media and during suspicious visits to Ghana, UK and elsewhere wherein the man of law in his avowed ambition is diametrically opposed to the Restoration agenda of the people of Southern Cameroons.
According to the communiqué, The Consortium had since February 9, 2017 officially moved or shifted its stance from Federation to Restoration, with the people of Southern Cameroons who have long decided and settled on statehood restoration as demonstrated and proven on the September 22 and October 1 demonstrations.
While Barrister Agbor Balla has called on the need for children to resume schools and an end to extended number of ghost town days, The Consortium members claim that a lot of pressure was mounted on the Yaounde regime through ghost towns, schools boycott and other forms of civil disobedience resulting to the release of Barrister Agbor Balla Felix, Dr. Fontem Neba and others while some others like Mancho Bibixy, Penn Terence and others are still languishing in detention cells in Yaounde.
The venomous diatribe by the consortium members describes Barrister Agbor Balla as anti-people, anti-freedom and anti-liberation and say his recent outings lends credence to the fact that he has been compromised by the Yaounde regime. They called on their people to consider him persona non grata.
The Sun reached out to Barrister Agbor Balla to respond these claims by members of the Consortium. His communication unit told us that “The Consortium is illegal as at January 17, 2017 following the ban by the minister of territorial administration and Barrister Agbor Balla has since moved on and is more concerned about meeting the needs and aspirations of the people”, they however refused to give any official response to particular claims by the members of the outlawed consortium.
The seed of discord between the members of the outlawed organization and its president, as reported in The SUN Newspaper Edition 0460 of Monday, October 30, was sown after the learned Barrister granted an interview to the BBB on Tuesday, October 24, 2017 at Bush House, London in which he maintained his stand for a return to a two-state federation as was the case after the Foumban Conference in 1972, a stance Agbor Balla has held for several decades now which led to his arrest and detention in Kondengui for almost eight months. He also added that the fight for the restoration of independence of the former British Southern Cameroons is an emotional option which is impossible to achieve.
“Independence is a very emotional thing. People, everybody likes it. But I look at the reality. I am a realist. You know, I look at the feasibility of having it. I am for a federation [two-state federation] that will bring the Cameroons together – the Anglophones and Francophones – to build a stronger country. Let us be honest, we can have unity in diversity”, Agbor Balla told the BBC
It should be recalled that the Cameroon Anglophone Civil Society Consortium was formed in the wake of the Anglophone crisis late last year with Barrister Agbor Balla as president and Dr. Fontem Neba as secretary general, the body also had as members; Tasang Wilfred, Eyambe Elias, Barrister Bobga Harmony amongst others; many of whom fled the country after the Barrister Agbor Balla and Fentem Neba were arrested on January 17, 2017 and The Consortium banned.
After the ban of the consortium and before the arrest of the leaders about four hours later, a communiqué purportedly transferred powers to other activisits in the Diaspora; Tapang Ivo Tanku and Mark Bara to act as interim leaders of the Consortium until further notice. They were later relieved of their functions by the original members of the Consortium; Eyambe Elias and Tasang Wilfred what had sought refuge in neighbouring Nigeria.
Since then, the Consortium has remained relatively dormant with a few sporadic releases until it was absorbed into a larger group of pro-independence organisations called SCACUF.
The recent communiqué attacking Barrister Agbor Balla has been greeted with mixed reactions. While pro-indepence advocates a celebrating the move, Federalist have criticised the decision heavily and called it unfair. They say Barrister Agbor Balla has done nothing but maintained a stance he has held for decades now and still holds after his release from prison.
The communiqué has apparently widened the rift between separatists and federalists in what has been termed as the Anglophone struggle.

<https://thesunnewspaper.cm/outlawed-consortium-disowns-agbor-balla-barrister-nkongho-felix-agbor-balla-says-body-illegal/>

1. **Growing rift between federalists and separatists**

[October 30, 2017](https://thesunnewspaper.cm/growing-rift-federalists-separatists/)

By Elah Geofrey Mbongale
There seems to be a widening crack between those who are fighting for a federation and those who want to separate from the republic of Cameroon and restore what they term the independence of the former British Southern Cameroons.
The protagonists are growing more and more apart with respect to strategy and solutions to the ongoing crisis that has engulfed the North West and South West regions of the country for a little over a year now.
End to schools boycott
The rift became even more evident after one of the main protagonists of federalism, Barrister Nkongho Felix Agbor Balla granted an interview to the BBC on Tuesday, October 24, 2017 at Bush House, London where he called for an end to schools’ boycott and protracted ghost towns
The comments by the human rights lawyer and president of the Cameroon Anglophone Civil Society Consortium, now outlawed, drew scathing criticism from separatists and even some federalists in the Diaspora and at home.
Federalism versus ‘independence’
In the interview, Agbor Balla called for the return to a two-state federation as was the case after the Foumban Conference in 1972, a stance Agbor Balla has held for several decades now which led to his arrest and detention in Kondengui for almost eight months. He also added that the fight for the restoration of independence of the former British Southern Cameroons is an emotional option which is impossible to achieve.
“Independence is a very emotional thing. People, everybody likes it. But I look at the reality. I am a realist. You know, I look at the feasibility of having it. I am for a federation [two-state federation] that will bring the Cameroons together – the Anglophones and Francophones – to build a stronger country. Let us be honest, we can have unity in diversity”, Agbor Balla told the BBC
Burning the bridge
Balla also furthered in the interview that he stands for a united Cameroon while calling for schools resumption after more than a year of boycott and extended ghost towns in the Anglophone regions.
“I believe that it is time for the leadership in the Anglophone community to ensure that kids should go back to school. I urge the leadership to consider that kids should be able to go back to school.”
Balla commenting on the toll the extended ghost towns have on small businesses said “It is a price that we all pay. I can understand a ghost town for one day. But when it is two or three days, I think it is heavy. Most of the business people that I talked to are okay if there is ghost town on Monday. But when you start making it for two or three days, especially in Buea which is considered the silicon mountain, it has a lot of effect on small businesses”
The heat on Balla
These comments drew scathing criticism from supporters of separation who think Balla wants to kill their only strategy that, according to them, seems to resonate with the population back home.
According to protagonists of separation, these same strategies helped put pressure on government to secure the release of some of the Anglophones arrested and detained in the ambit of the Anglophone crisis-including Barrister Nkongho Felix and other Anglophone leaders.
They question why Balla should call for an end to the strategy when some other Anglophones are still being held in prisons in Yaounde, adding that if the strategy was good enough to have Barrister Agbor Balla and others released; it should be good enough to get the remaining Anglophones in detention released.
Some of the supporters of separation, commenting on the Balla’s call for end to schools’ boycott and restricted ghost towns questioned why the Human Rights lawyer would choose to burn a bridge after crossing it, knowing that there are others like Mancho Bibixy, Pen Terence and others who were left behind and still languishing in jail.
The attacks, mostly from proponents of separation were nasty and brutish with some saying that the president of the outlawed Consortium has been compromised by government after spending eight months in jail and has been sent on a mission to kill the fight for the restoration of the ‘independence’ of the former British Southern Cameroons.
SCACUF stays mute
SCACUF and the Southern Cameroons Governing council, made up of mostly Anglophone activists in “exile”, have been calling for a continuation of schools boycott and ghost town but have not officially responded to Balla’s calls to the contrary.
However, a conclave of the Governing council that took place over the weekend was characterised by serious disagreements which prompted the Chairman, Sisiku Ayuk Tabe to suspend deliberations. The conclave also saw the resignation of the Secretary General Milan Atam. No resolutions were released at as press time yesterday when the conclave was expected to wrap up.
At the beginning of the conclave, the Chairman said “The Struggle is bigger than all of us put together, No one person or groups of persons can kill the struggle but the struggle, if it chooses, will kill all of us and still, the struggle will not die.”
Who speaks for the people?
It is unclear where the pendulum of the Anglophone struggle is now swinging to. Before and during the arrest and detention of some Anglophone leaders early this year, which forced many others to go underground or on exile, there seemed to be some correlation between federalists and separatists, at least in terms of strategy.
While separatists think they have the backing of a good number of Anglophone Cameroonians, evidenced by the massive turnout during the September 22 and October 1 demonstrations respectively, called by the Southern Cameroons Governing Council, proponents of federalism also think most Anglophone Cameroonians are now learning more towards the federalism option.
“I think lots of Anglophones also are now talking about a federation. And I think we have moderate francophones who have joined the call for a federation. Prior to our arrest, federation was a taboo. Discussions about it were taboo. We think now that everybody understands at least that federalism is a form of government that can be acceptable to everybody. And it ends up being a win-win situation. So, it is a balance between those calling for restoration of Southern Cameroons’ independence and those who believe in a unitary state. So, if we can have a federal structure, it will help the country”, Agbor Balla told the BBC during the famous interview.
Balla’s homes under attack
The social media war between supporters of separation and supporters of Balla witnessed a major twist early Sunday, October 29, 2017 morning when the houses of Barrister Nkongho Felix Agbor Balla in his native Bakwelle village in Manyu division and that of Buea where targeted by arsonists in what seemed like a coordinated attack. The SUN reached out to Barrister Agbor Balla through his communication team and was told that; “Barrister Balla is in shock and can’t make any statements at this time. He confirms that his Bakwelle home was torched and an attempt made on his Buea residence.”
Stalemate in the ‘struggle’
Despite calls from several countries and international bodies including the US, UK, France and the United Nations for an inclusive dialogue to solve the Anglophone crisis, with most of them calling on government to address the root cause of the problem, nothing concrete seems to be happening.
Government recently dispatched a delegation, of what many termed pro-government Anglophone elites, to the North West and South west on a peace and dialogue mission. The report of the mission is yet to be made public and President Biya is yet to make any official public statement on the crisis.
Many have castigated the nature of the talks, saying that those who were invited to the talks, in most cases were carefully selected to avoid any anti-government reactions.
With the perceptible fissures between protagonists of what has now been termed the Anglophone struggle, government seems to have developed a ‘wait-and-see’ posture to allow the feuding camps to tear themselves apart while hoping that the tension in the two Anglophone regions will fizzle out with time.
Government apparently is banking on the gradual return to normalcy in the two regions with the ever increasing turnout in schools, dismal respect to calls for ghost towns and the announcement by some Common Law lawyers in Fako and Meme to suspend their year-long strike.

<https://thesunnewspaper.cm/growing-rift-federalists-separatists/>

1. **SDF vows to take botched Douala march to the NW**

[October 30, 2017](https://thesunnewspaper.cm/sdf-vows-take-botched-douala-march-nw/)

By WIFAH J. NDE
The decision by the Social Democratic Front, SDF to move the failed march past in Douala planned for Saturday October 21, 2017 to Bamenda in the days or weeks ahead was one of the resolutions arrived at during an emergency National Executive Committee, NEC meeting held this Saturday October 28.
Among other issues, the SDF maintained firmly that they too have rights of expression in this country like the ruling party does. It is for this reason that they have taken the oath to challenge whatever administrative order that will emerge when the time comes.
It is not clear yet when this march shall take place but their stand for a march in solidarity with the Anglophone crisis is at this point irreversible as affirmed by some MPs and Mayors

They equally echoed on their Elective Convention which was billed for October 27-29 but indefinitely postponed due to the Anglophone crisis. It was resolved that while the party observes for tensions in the two Anglophone regions to die down, the convention shall likely take place in the month of February next year.
Though not revealed to the press, The SUN was hinted that one other issue expected to be arrived at is sanctions against MPs who declared their resignation from parliament on social media during the September 22 uprising in the Northwest and Southwest regions of the country.
This is particularly so because the SDF is not in support of secessionist movement ando such pronouncements may provide breeding grounds for separation within the party, according to party hierarchy.
In this vein, the party recommitted her militants and representatives to stick to partisan principles. They however, told pressmen that these representatives shall continue to serve as the people’s representatives in parliament and the party like they have always done. The concerned representatives on their part refused to talk to the press.
At press time, resolutions of the meeting were still pending release while the press was told they shall be informed of the next National Executive Committee, NEC in the future when all plans set.

<https://thesunnewspaper.cm/sdf-vows-take-botched-douala-march-nw/>

1. **SDF makes inroads in Konye ahead of 2018 elections**

[October 30, 2017](https://thesunnewspaper.cm/sdf-makes-inroads-konye-ahead-2018-elections/)

BY TALL A AGHAA CHRISTOPHER
Konye is a sub divisions in Meme Division of the South West Region and for almost 20 years as an administrative unit, the division that hosts the Bakundu, Mbonge and Bafaw tribes has been home to a plethora of political parties including; the Cameroon People’s Democratic Movement, CPDM, the Social Democratic Front, SDF, the National Union for Democracy and Progress, NUDP, and the National Alliance for Democracy and Progress, NADP.
The CPDM has always maintained her supremacy in both the council and Parliamentary elections and the sub division has always voted overwhelmingly for the CPDM in all Presidential elections, except in 1990 at the dawn of multiparty politics in Cameroon when the subdivision voted overwhelmingly for the NUDP with Hon Motaze Ngoh David winning the lone parliamentary seat of the Meme West Constituency.
Currently, the CPDM controls the municipal council and the parliamentary seat with Barrister Musima Georges Lobe as Mayor and Hon Atinda Martin as the Member of Parliament respectively.
However with the much anticipated elections of 2018, Konye seems to be boiling politically with the SDF, Cameroon’s frontline opposition party making some major inroads.
The SUN gathered that the party of John Fru Ndi is giving sleepless nights to the CPDM barons in the area.
Reliable sources hinted The SUN that the SDF has already visited almost all the 36 villages that make up Konye Sub Division with lofty political promises which seems to be resonating with the population.
The SDF team including Barrister Njoro Abraham of Limbe, Barrister Ilambo Godlove of Kumba and the SDF District Chairperson of Konye, Motumba James with support from the Pioneer Konye SDF Electoral District Chairman and last Parliamentary Candidate, Pa Dibo of Ikiliwindi stormed Konye passing through Koba, Sambaliba, Wone, Itoki, Mbu-Bakundu, Ibemi, Kombone-Bafaw, Ikilinwindi, Matoh, Diongo, Matondo, Baduma Kurume Kokaka, Dikume Bafaw, Kokobuma, and Mbakwa Supe, talking to the population and promising to visit other parts of the Sub Division in the days ahead.
In one of their political rallies, the SDF called for a no-confidence-vote for the incumbent Mayor, Barrister Musima George Lobe and the need for the electorate to throw their weight behind the SDF during the upcoming election.
They told the population that it’s only through the SDF that meaningful development can come to Konye.
The SDF drew the attention of the population to the fact that the roads within the municipality are bad, there is the absence of electricity, no veritable health facilities, whereas money is been collected by the council authorities with no objective and accountability.
They said with the SDF, there will be transparency and transformation of the municipality with no one left behind.
Quizzed whether they are taking advantage of the current Anglophone crisis, to make their voices heard, they told The SUN that even during the last elections, the SDF won in majority of the villages as per ELECAM statistics, reasons why the SDF had about 43% of the votes in the area.
They observed that the current Anglophone crisis has nothing to do with their intentions because they are simply telling the electorates the truth and that 2018 is not time for another political blunder.
The dream of the SDF to capture Konye in the upcoming elections won’t be served on a platter of gold. The CPDM, according to Barrister Musima, Section President in the area, has achieved a lot in terms of development.
“The records are clear and can easily be seen even by a blind man. The Council just won the best PNDP award in the region with a cash prize of FCFA 50million. The Council has equally embarked on an electricity project for the municipality with Kaboni Energy currently executing the multi- million project that is expected to completed by mid 2018. In Konye there is a visible Konye Council Business center, with perfect farm to market roads” a CPDM militant told The SUN.

<https://thesunnewspaper.cm/sdf-makes-inroads-konye-ahead-2018-elections/>

1. **Teche Nyamusa challenges Fru Ndi to cleanse the SDF party**

[October 24, 2017](https://thesunnewspaper.cm/teche-nyamusa-challenges-fru-ndi-cleanse-sdf-party/)

By WIFAH J. NDE
The Social Democratic Front, SDF National Chairman aspirant and presidential hopeful, Felix Teche Nyamusa has challenged Ni John Fru Ndi, chairman of the SDF and his surrogates to cleanse the party which they have badly soiled.
Speaking to The SUN in a lengthy chat recently, Teche Nyamusa watered down the regime of John Fru Ndi describing it as a team of dictators, nothing short of the Biya regime which they (SDF) are always quick to condemn.
He accused the chairman of making the party a personal property, ruled alongside a few, thereby derailing the original objective of the party.
He describes the indefinite postponement of the National Elective Convention originally billed for October 27-29 as strategy by Fru Ndi to keep allying with the Biya regime and attempt to thwart his political aspirations.
By accumulating functions such as National Chairman, chairman of National Executive, NEC, National Investiture Committee, NIC and National Advisory Council, NAC, Nyamusa thinks, Fru Ndi is just as good a dictator as Biya.
Nyamusa says the absence of transparency and poor accountability of financial management in the SDF led to resignation of Dr. Elizabeth Tamanjong and two others as Secretary Generals of the party. This is because power has been centralized and is in the hands of one man, Fru Ndi.
With these ordeals, Nyamusa says, the SDF has lost its democratic values and thus calls for an urgent need for the house to be cleansed if the party must remain democratic with reputation. He says it is as a result of these cracks that the regime is taking advantage to continually commit atrocities with no outright objection.
He further argues that this has greatly weakened the party which is now a shadow of itself, unable to make a strong voice in the midst of the Anglophone crisis. “Had SDF remained a powerful opposition party, the current Anglophone crisis would not have dragged for this long”, Nyamusa told The SUN.
He however, opined that for the SDF to regain past glories, a change which he shall implement if voted National Chairman, power should be decentralized. Says the constitution of the party should be revised to modify those clauses which allocate much power to the National Chairman.
Felix Teche Nyamusa furthered that, the position of Secretary General, SG should be elective and not by appointment. He decried loudly and wondered how on earth the chairman could have been made the head of the NAC. An organ meant to advice him and other party executive members.
Equally, he opined that, the SDF is not a poor party and so should have secretariat where national events and meetings should hold. Stating that, the use of the chairman’s residence as ground for party meetings and events further depicts monopoly and high-handedness of the party by Fru Ndi.
He also did not forget to recall the death of Martin Fon Yembe, former first deputy mayor of Ndu council who had served in the capacity of provincial chairman of the SDF from 1998 to 2002 a period during which he successfully secured 19 parliamentary seats and 70% of the councils in the Northwest who died on October 2, 2017.
Nyamusa blamed the death of the exemplary Martin Yambe who served the party wholeheartedly on stress from the Biya regime given that he has always been firm opposition to the regime, a fighter for the human and people’s rights which had brought him under stiff resistance with the government and threats.
He recounted that the poor state of roads, poor medical facilities and the hesitance of the administration to have granted permission for Yembe to have been rushed to a better hospital, led to his death.

<https://thesunnewspaper.cm/teche-nyamusa-challenges-fru-ndi-cleanse-sdf-party/>

1. **Limbe population makes pressing demands**

[October 24, 2017](https://thesunnewspaper.cm/limbe-population-makes-pressing-demands/)

BY SIMON NDIVE KALLA
The population of Limbe has unanimously called for release of Anglophone detainees, asked the government to declare a day of mourning for all those who have been killed in the cause of the crisis, open a support fund for the families of victims of the crisis and the creation of ten autonomous regions. They also called on the Head of State to personally initiate dialogue with the populations of North West and South West regions.
They made these demands and more during consultative talks with elites sent by the president of the republic on a peace and dialogue mission to the North West and South West regions.
In Limbe I where the Government delegate to the Limbe City Council, Motanga Andrew Monjimba chaired the meeting alongside Fako East MP, Hon. Etombi Gladys and Mayor Ro-Danny Mbua of Limbe I, the population made up of representatives of social and traditional groups engaged in a civil and frank discussion with the elite.
Motanga Andrew Monjimba told the population that for over a year, the security of the Nation has been threatened and nobody is happy about it and that’s why the head of State sent them for consultative talks.
Motanga Andrew said the Head of State wants the truth from the grassroots and will not invite UN or AU to resolve the crisis while calling on the population to give peace a chance since dialogue is a continuous process.
Welcoming the elites in Limbe II, Mayor Ducan Molindo said the state is facing a lot of social problems and nobody is happy with the ongoing Anglophone crisis.
He lamented that the state is well informed about the ongoing Anglophone crisis while decrying the fact that Limbe II has a lot of companies but the youths are still unemployed.
The head of the delegation to Limbe II, Senator Matute Daniel said the Head of State instructed them to preach peace and dialogue with the population and listen to the people to so as to prevent bloodshed and to say no to violence, vandalism and ghost town.
According to Barrister Alice Luba, she doesn’t wish for that Cameroon to separate but urged the government to listen to the cry of the Anglophone minority. She added that the peace mission is coming a little too late when a lot of things have happened.
She said the government has not been sincere and some government officials have fanned the flames by referring to the Anglophones as “dogs”. “The dogs are ready to bite very hard”, she added.
Meanwhile Rev. Daniel Igelle Parish pastor of PCC Batoke said the peace dialogue was frank and it’s left for the Biya regime to either listen to the voice of the Anglophones or continue ignoring the problems.
The Limbe II populace demand that government demilitarize the North West and South West Region, reinstate internet, rehabilitation the Tiko airport and construct the Limbe deep seaport. They equally called for a federal state of government that will bring administration closer to the people.
Chiefs in Fako Division joined their voices to the call for immediate construction of Limbe deep seaport, Chantier Naval and cement factory in Limbe, abandoned projects which had hitherto been earmarked for Limbe.
They equally called for the institution of English language as an official language at the Mutengene police college and other institution in Fako Division.

<https://thesunnewspaper.cm/limbe-population-makes-pressing-demands/>

1. **Mamfe elites play hide and seek with population**

[October 24, 2017](https://thesunnewspaper.cm/mamfe-elites-play-hide-seek-population/)

By Sah Terence.
Following the many twists taking place in the Anglophone crisis, with a government peace talks delegation sent out to the entire Anglophone territory last week, the people of Mamfe seem not to have noticed the presence of any high level delegation from Yaoundé but saw a few of their elites patrolling the town in their big cars.
These elite were meant to meet with the population of Mamfe at the Mamfe town hall on Monday 16th October 2017 but the meeting venue though heavily militarised had in attendance mostly the Yaoundé delegation with a hand full of elites in the hall confined to the front seats as the number was too small.
A Mamfe inhabitant in his 60s told The SUN that; “yes they came to have their elites meeting and not to meet with the people because we don’t even know where they are now or where they were yesterday.”
Many are of the opinion that the way the delegation avoided the press, not giving any clear schedule of their movements and meetings has left many wondering if they did not just take a week-long vacation to Mamfe.
Meanwhile, reliable reports from Ncahng in Mamfe say those who attempted meeting with the people of Nchang village were told to repair all the cars and houses shattered by the military on October 1st before talking to them.
In a phone conversation with a source in Akwaya, he told The SUN that the Akwaya delegation was received by a grumbling hall.
Meanwhile Senator Anja in Satoum was quizzed by his people on the last time he was seen in the village since he became Senator.
It is thus clear that the Mamfe delegation rode back to Yaoundé with no good news thus another failed government strategy.

<https://thesunnewspaper.cm/mamfe-elites-play-hide-seek-population/>

1. **Meme accuses SW elites of dishonesty**

[October 24, 2017](https://thesunnewspaper.cm/meme-accuses-sw-elites-dishonesty/)

By DANIELA NEBA NGUM
The population of Meme Division, Southwest Region has accused ministers of the Southwest origin of not painting a real picture of what is going on in the region. They equally faulted them of not fighting for the rights of their brothers whom they claim to represent.
The people aired their grievances last week during meetings with the peace commission members of Kumba I appointed by the Head of State, Paul Biya.
“Our ministers and top elites of the Southwest Region are the ones killing us. They are not telling the government the real truth in order to protect their political interest”, they noted.
According to one Mr. Dibo in Kumba Town, citizens in the Northwest and Southwest Regions have been marginalized with non of their ministers are fighting against this marginalization for political reasons.
“We the Anglophones are extremely marginalized as if we didn’t go to school, whereas we have Ministers who can fight for us”, he added.
While speaking with anger, Mr. Dibo enumerated the names of Southwest Ministers who have served and are still serving the government in multiple functions.
In the course of talking he was nearly interrupted by a senior elites who was equally hushed by youths and a member of the Kumba I peace commission, Lawson Tabot Bakia who reminded the population that the meeting is meant for the population to express their minds freely so that they can transmit their problems to the hierarchy for a better solution.
Mr. Lawson Tabot cautioned the population not to be too personal while explaining their grievances.
The representative of indigenous Bafaw youths noted that they stand against not going to school and the respect of ghost town. They urge the President of the republic to dialogue with elites of the Southwest and Northwest Regions of the country and also for government officials to desist from using provocative and derogatory statements in the media.
Creation of 10 Autonomous states
In all meetings the Meme peace delegation held with elites, the creation of 10 autonomous states came up as a primordial condition to the resolution of the ongoing Anglophone crisis.
According to the population, giving autonomy to each region will help them manage their resources well and improve on development.
Speaking to the press, the head of Kumba I delegation noted “The population has been talking about a decentralized ten autonomous regions in Cameroon.”
He was corroborated by Lawson Tabot Bakia, a member of Kumba I Commission “Nobody in all the meetings we have held talked about separation, all they are grieving for is regional autonomy”.
President to Visit NW an SW Regions
Another proposed solution to the ongoing Anglophone problem is for the President of the Republic to visit and dialogue with the population of the Southwest and Northwest Regions of the country.
“If the Head of State can dialogue with Boko Haram terrorists while can’t he dialogue with his citizens of the Northwest and Southwest Regions”, an elite lamented.
Quarter heads equally disclosed that the minds of the population are bitter and only the President’s visit to these regions can calm down the situation.
They added that if the Head of State keeps on sending delegations to these regions, it will aggravate the situation because the population may think that he attaches less importance to their plight.
An inclusive Commission
Unlike in Kumba II, where the peace mission was solely a CPDM affair, Heads of delegations in Kumba I and III disclosed that their list was enlarged and updated to include all active political parties, civil society activists and other sectors concerned.
“The list was enlarged and updated. It included all active political parties, clergy, civil society. We all dialogue as one man and reputable people from each community came up with a way forward”, the head of Kumba III delegation told reporters.

<https://thesunnewspaper.cm/meme-accuses-sw-elites-dishonesty/>

1. **Tchiroma says govt was forced into war with secessionists**

[December 21, 2017](https://thesunnewspaper.cm/tchiroma-says-govt-forced-war-secessionists/)

By DOH JAMES SONKEY
Communication Minister and Government Spokesperson, Issa Tchiroma Bakary has vehemently rejected claims that government has resolved to use war as a solution to the socio-political crisis in the North West and South West Regions. He made the clarification last December 18, 2018 at a press conference he granted in Yaounde to update public opinion on confrontations between Forces of Law and Order and secessionists movement in Manyu Division in the South West Region.

Asked if government has finally concluded that it will use only force to solve the Anglophone crisis, Minister Issa Tchiroma Bakary responded that “No, it is not the option of the government but it was forced to do so. Remember that the President of the Republic was clear enough in his declaration that the war is being waged against secessionists who are terrorizing the population in the North West and South West regions. Government will continue to promote dialogue in its quest to look for lasting solutions to the crisis so that peace and serenity can be restored in these two regions.”
While expressing optimism that government will win the war against the terrorists, Minister Tchiroma promised that they will use all means possible including diplomatic ones in order to convince secessionists to give up the struggle and return home.
He told the media that, category 3 forces carried out dismantling operations destroying secret training camps and hideouts of secessionist forces in the dense forest at the border with Nigeria and liberated villages previously taken hostage and seized weapons. The Government Spokesperson explained that “No civilian or military death or casualty was recorded during these missions, which, it must be emphasized, were carried out with exemplary professionalism by our Defence Forces. On the enemy side, many terrorists have been permanently neutralized. Several suspects have been arrested; large quantities of war and hunting weapons as well as hundreds of military ammunition and uniforms have also been seized. On the same occasion, transmission and optical equipment, as well as large stocks of propaganda media, were recovered. Exhibition and parade sites on which the terrorists had hoisted their banners were also taken back and sanctuarized.”
He extended President Paul Biya’s condolences to bereaved families of four gendarmes who “were cold-bloodedly killed on December 18, 2017 in Kembong, Eyumodjock Subdivision in the Manyu Division.”
While reassuring the population of the NW and SW regions that the entire nation share in their pains, Issa Tchiroma stated that the Head of State, Commander- in-Chief of the Army has reiterated to the Cameroonian people, his determination to restore peace, security and serenity wherever need be throughout the national territory.

<https://thesunnewspaper.cm/tchiroma-says-govt-forced-war-secessionists/>

1. **Six fallen soldiers honoured posthumously in Buea**

[December 12, 2017](https://thesunnewspaper.cm/six-fallen-soldiers-honoured-posthumously-buea/)

By Ikome Christie-Noella Eposi in Buea
The remains of six soldiers who died after unidentified men gunned them in Manyu division in the South west region where on Friday December 8, 2017 honoured at the Independence Square in Buea.
The Minister of Defense, Joseph Beti Assomo who read the condolence message from the Head of State, President Paul Biya to the bereaved family noted that the soldiers died as

“I imagine the depth of your pain following the passing away of your beloved relatives. They were very courageous and dynamic personnel, very devoted and committed to their mission, they were permanently available to accomplish their duties every time they were solicited. They shall always remain an example to be enumerated by their colleagues” Beti Assomo told the bereaved families.
The Head of States, through the defense minister expressed his sincere condolences and deep compassion to the families of the dead soldiers and assured them of full support from the nation at all times.
It should be noted that in a recent media outing, the president of the Republic has promised that, he will wipe out those perpetrating the killings. It has been alleged that the unidentified persons who killed the soldiers did so in a bid to revenge the killings of their own relatives and friends especially during the heat of the Anglophone crisis.
Minister Joseph Bet Assomo addressing the mourners and the members of military family present said; “Cameroon is a victim of repeated attacks by terrorist groups claiming the secessionist movement”
He assured the population that in the face of such moments, measures have already been taken to put the criminals out of business and ensure that peace and security reigns in the nation.
Four of the six military men were killed on the night of Tuesday November 28 2017 in the locality of Agborkem-German in the Manyu division, while the other two policemen were killed on the night of the Wednesday November 29 2017. The 4 military men killed were Noutchomwo Raphael, Yinda Dobekreo, Voula Voula and Tih Angu. Meanwhile, the other 2 police men killed were Nkwelle Derick and Ngwa Calvin Ngang.

<https://thesunnewspaper.cm/six-fallen-soldiers-honoured-posthumously-buea/>

[**NEWS**](https://thesunnewspaper.cm/category/politics/)

1. **SDF MPs take parliament hostage with ‘Operation blocus’**

[December 12, 2017](https://thesunnewspaper.cm/sdf-mps-take-parliament-hostage-operation-blocus/)

By DOH JAEMS SONKEY
Things are no longer the same at both the Lower and Upper Houses of Cameroon Parliament as fireworks continue to multiply during the November 2017 ordinary session of Parliament traditionally dedicated to the examination and adoption of the state budget for the 2018 fiscal year.
For quite some time now, nearly all plenary sittings dedicated for general discussions on bills are pregnant with suspense as MPs of the leading opposition Social Democratic Front, SDF party continue with what they term Operation Block all deliberations until Anglophone problem is discussed in Parliament.

The operation went ugly in the night of 8 December 2017 as three UDC party MPs led by Hon Patricia Tomainou Ndam Njoya attempted in vain to be given the floor to speak in the House Chamber. Seemingly frustrated by the fact that the SDF standoff in Parliament prevented the Speaker, Hon Cavaye Yeguie Djibril from giving them the floor during general debate on the state budget in an angry mood, she mistakenly landed a name tag on the forehead of CPDM MP for Menchum South Constituency, Hon Wallang Richard provoking the oozing of blood.
Though she expressed remorse for her action through an excuse sms sent to Hon Wallang Richard, social media created a different scenario with the incident when some unscrupulous individuals posted claims that Hon Patricia Ndam Njoya intentionally hit Hon Wallang on his forehead with the name tag because he was opposing SDF MPs who had been insisting that the Anglophone crisis be discussed in Parliament before any other issue.
Such claims described as malicious have been refuted by the CPDM MP who did not utter any word in the House Chamber that evening.
SDF’s Operation Block all plenary sessions took a different twist last week as the party’s Senators introduced the fight in the Upper House of Parliament, thereby blocking a plenary sitting at the Senate chaired by the President, Marcel Niat Njifenji for over four hours. Deliberations only resumed after SDF Senators obliged Marcel Niat Njifenji to take an engagement to open up discussion on the Anglophone crisis in the next plenary.
SDF Senators however, promised to disrupt the voting of the state budget if the Senate President does not respect his engagement.
Keenly observing all these happenings in Parliament, some political pundits are sharp at declaring that democracy is now forcefully penetrating Cameroon Parliament thereby nursing hopes for a better future in the country’s political landscape.

<https://thesunnewspaper.cm/sdf-mps-take-parliament-hostage-operation-blocus/>

1. **Tambe Tiku decries selective justice in Human Rights abuses**

[December 12, 2017](https://thesunnewspaper.cm/tambe-tiku-decries-selective-justice-human-rights-abuses/)

Ahead of the commemoration of 69th edition of the Human Rights Day, HRD on December 10, 2017, The Sun Newspaper caught up with the Secretary General of the Human Rights Commission, South West region, Barrister Tambe Tiku to know the significance of such day in the context of the ongoing Anglophone crisis in which many Cameroonians, especially those of the English speaking regions feel their fundamental human rights have been violated. He was speaking to The SUN’s Ikome Christie-Noella Eposi in Buea. Read on.

The SUN: What is the Human Rights Day all about?
Tambe Tiku: The Human Rights Day is a very significant day in the records of the United Nations which was set aside to commemorate the Universal Declaration Of Human Rights and was adopted in Paris in 1948. Since then it has always been set aside as one of those important days to be celebrated internationally. This year’s theme is “Human Rights start with you”.
A very simple theme but pregnant with a lot of meaning because it recognizes the fact that, you have rights and you have to stand as an individual to defend those rights and at the same time defend the rights of others.

How will your office celebrate this year’s edition in the context of the ongoing crisis?
This year has been a very difficult year not only for my office but for the entire country. We have had a lot of Human Rights challenges and we still face such challenges. There is nothing much to celebrate about but it is also important for us to seize the opportunity to pass the message that our office has been involved in long activities in the hinterlands trying to move to some of the local communities sensitizing them.
On December 10, 2016, I openly mentioned on one of the television programs that, we are at the brink of the social calamity and if conflict prevention methods are not put in place, we will be facing serious problems and that is exactly where we are today.
From last year till now, we are on the same spot; things are still stagnant like never before. It is never late, we need to start putting in place concrete measures, it’s not just all about mere dialogue but it should be a sustainable one.

How informed are the people on their rights especially at such a pertinent period where most of them feel their rights have been violated?
The people are so aware of the level of violations that are taking place. We have previously witnessed some arbitrary actions, high handed actions taken by some officials without any consideration to the rule of law. We also have a culture of impunity which has made matters worse. Justice has not been a prevalent factor in most cases of impunity. These are some of the actions that have contributed in fueling the flames in the common man and these are wrong feelings because when all hopes would have been lost, the only thing they will count on is their fundamental human rights and when the rights can’t be guaranteed, it then leads the people to a situation of frustration which then leads to violence.

What are some of efforts by your commission to help the common man on their rights?
We are trying our possible best though with a very minimal work force. The people themselves are not giving us enough cooperation.

What do you propose as the way forward to the present crisis especially on human rights violation?
I am saying that the government also has a responsibility to ensure that those who fall out of the law are brought to order so that they can respect the rights and freedom of other Cameroonians.
Those sent by the state to ensure law and order should stop extorting money from fellow citizens. We cannot continue practicing selective justice. It is not going to help our democratic process in any way. On the contrary, it mars the reputation of the country vis-à-vis international engagements.

So what is your message to the people and to the authorities?
I go back to the theme of this international human rights day which is Human Right Starts With You. The people should know that they have a right to protect, they should stand to defend their rights and at the same time, they should know that other people have rights that they have a duty to protect and to defend because it makes no sense to think that you have rights while others do not. Everybody has rights. In our own little corner we have managed to deplore some of the violence against the forces of law and order who are there to maintain peace and ensure that one’s right and property are protected.
I will therefore conclude by saying that the idea of human rights is not just for any ordinary citizen but it is also about the forces of law and order who are there to do their jobs because it is not in all the cases that the forces of law and order have misbehaved but our concern is for individuals and their property to be protected.

<https://thesunnewspaper.cm/tambe-tiku-decries-selective-justice-human-rights-abuses/>

1. **2018 Youth Day Message Threats to peace have eased – President Biya assures**

[February 14, 2018](https://thesunnewspaper.cm/2018-youth-day-message-threats-peace-eased-president-biya-assures/)

-Says situation in the South West and the North West is stabilizing
-Calls for responsible internet use

BY ATIA TILARIOUS AZOHNWI
President Paul Biya has in his traditional Youth Day Message to the youth on February 10 said tensions in the North West and South West Regions have abated. He went on to congratulate the country’s military for successfully curbing Boko Haram atrocities among others.

President Biya thanked the Cameroonian youth, saying they have been instrumental in bringing peace and order along the northern border with Nigeria, where Boko Haram has been active, and in the North West and South West Regions where complaints by teachers and lawyers about the overbearing influence of the French language degenerated into separatists calls for independence that resulted in armed conflicts with the military.
“The situation in the South West and the North West is stabilizing. Indeed, the characteristic resilience of the Cameroonian people deserves to be hailed once again. Allow me once again to underscore the heroism of our defense and security forces, mostly young people,” he said.
He said the present situation now makes it possible for the National Commission on the Promotion of Bilingualism and Multiculturalism to set in to address the root causes of what is now known as the Anglophone crisis.
Hear him: “the situation in the South-West and North-West Regions is stabilizing, and the Commission for the Promotion of Bilingualism and Multiculturalism should thus be able to delve into the crux of the problem.”
In his speech, Biya urged the youth to prepare for the decades ahead, when they will be leaders. He said they need to be up for the task and acquire the necessary skills and experience.
The President acknowledged that economic growth had slowed due to outside factors, but said he would forge ahead in various sectors of development. He said 2018 will mark the completion of his major road and hydro power development projects.
Cameroon has been enveloped by the Boko Haram insurgency that has claimed thousands of lives on its northern border with Nigeria, displaced hundreds of thousands of people, and pushed 80,000 Nigerian refugees into its territory.
The central African state also is affected by the crisis in neighbouring Central African Republic, with regular attacks and kidnappings for ransom in its territory. And, recently, the crisis in the English-speaking regions of the country have led to hundreds of people, including about 23 policemen and soldiers, being killed.
In spite of the continuing threats from Boko Haram and the separatists which opposition political parties say may hamper the organisation of elections, 85-year-old President Biya, who has served for 35 years, insisted that elections will be held this year since peace is returning.
“2018 will be an important election year and all youths aged 20 years and above should be able to — or rather should — exercise their right to vote because by voting, they will be performing an act of responsible citizenship and, thus, participating in forging their destiny,” Biya said.
The president called for a responsible use of the internet.
His words: “In this regard, your favourite platform of expression is the social media. Whenever at a click, you access these communication highways that give you global visibility, you must bear in mind that you are not exempted from fulfilling civic and moral obligations, such as respect for others and your country’s institutions. Be patriotic Internet users working for Cameroon’s development and influence, and not passive followers or naive relays for staunch critics of the Republic.”

<https://thesunnewspaper.cm/2018-youth-day-message-threats-peace-eased-president-biya-assures/>

1. **Protesters seeking release of Ayuk Tabe, others arrested**

[January 15, 2018](https://thesunnewspaper.cm/protesters-seeking-release-ayuk-tabe-others-arrested/)

***By Elah Geofrey Mbongale***

Several alleged separatist supporters are being held at various dreadful detention centres across Cameroon, and others on the run following the mass arrest of protesters, who stormed the streets of North West and South West regions, January 8 to 10, 2018, requesting the immediate release of separatist leaders, Sisiku Ayuk Tabe, Nfor Ngalla and seven others arrested in Nigeria.

Sisiku Ayuk and colleagues were arrested, January 6, 2018 at a hotel in Nigeria in connection to the Anglophone crisis, which started as a strike action in November 2016, by Common Law lawyers and teachers in the North West and South West regions protesting government’s attempt to assimilate the educational  and judicial systems. This later metamorphosed into serious deadly clashes between the Cameroon defence forces and those seeking “the restoration of the statehood of former British Southern Cameroons”.

Disgruntled by the arrest of their leaders, Anglophone separatists launched a three-day ghost town and strike action, from January 8 to 10, 2018, requesting the immediate release of Sisiku Ayuk and others. This civil disobedient was observed in most cities in the North West and South West regions, and other parts of the world. In Bamenda, several shops, banks, and schools were reportedly closed, while in Buea and Limbe, the strike was less widely observed.

As days went by, steam gathered amongst pro-separatists, most especially members of the Southern Cameroon National Council, SCNC. This culminated in a street protest in towns like Buea, Limbe and others in the South West Region, which resulted in deadly clashes between protesters and security forces deployed by the government to halt the street protest.  Several youths were brutalized, some shot and several others arrested and ferried to different detention centers across the country.

Detail information about those arrested, shot and or brutalized remains a conjecture but the SUN got it on good record that a certain Mr. Ayuk, was shot in the stomach around the Limbe Community Stadium. According to family sources, he was immediately taken to a hospital (name withheld for security reasons), from where he escaped to an unknown destination, shortly after gaining strength.

Meanwhile, the  Senior Divisional Officer for Fako, has declared leaders of the strike action “wanted”.  It is clear that if any of these leaders are caught, they will be brought before the military tribunal and slammed heavy jail terms at Kondengui maximum security prison, like the case of Mancho Bibixy, Tsi Conrad, and Penn Terence, who were arrested in January 2017.

Tension is escalating in the English-speaking regions of Cameroon, most especially between government forces and separatist fighters, better known as *Amba Boys*, since October, when secessionists unilaterally proclaimed independence for the envisage state of Ambazonia (former state of British Southern Cameroons). The ongoing unrest has prompted the US Embassy in Yaoundé to issue an advisory to its citizens and embassy staff to exercise caution when traveling to the two regions. Similarly, the UK Foreign and Commonwealth Office (FCO) has released a travel warning advising against all travel to the Southwest Region’s Bakassi Peninsula, and all nonessential travel to Bamenda in the Northwest Region

<https://thesunnewspaper.cm/protesters-seeking-release-ayuk-tabe-others-arrested/>

1. **Commonwealth Secretary General brings peace message to Buea**

[January 3, 2018](https://thesunnewspaper.cm/commonwealth-secretary-general-brings-peace-message-buea/)

By Ikome Christie-noella Eposi
With an intention of bringing lasting solutions to the Anglophone crisis, the Secretary General of the Commonwealth, Patricia Scotland was in Buea on Friday December 22 2017. The August visitor was welcomed at the governor’s office in Buea, where she met with other officials. The brief but yet symbolic meeting began with the hoisting of both the Cameroon and the Commonwealth flags which contributed in adding glamour to the official visit as well as honoring the bond between Cameroon and Commonwealth.
During the meeting at the governor’s office, the governor of the South west region, Bernard Okalia Bilia brought forward the various problems that the region has been facing particularly as concerns the Anglophone crisis. The effects it has had on both the government and the community. He equally tabled some measures which have been put in place by the Cameroon government to reduce the tension in the region by promoting peace,

Proceeding to the Buea council, the Secretary General, Her entourage and other dignitaries met with traditional authorities of the Southwest and Northwest regions, youth and women associations etc. Though the meeting with traditional authorities was strictly forbidden from the press, the case was different with that of Youth associations where the Commonwealth youth ambassador for Cameroon, Achaleke Christian tabled some problems faced by the Cameroonian youth such as the well known unemployment, poverty etc which has all been the bedrock of grievances of the youths.
“Youths have been the key and the power to make peace sustainable. Dialogue is the only way out of all the violence and insecurity” Christian purported.
Patricia Scotland taking the floor to address the “youths” in the hall, she applauded the efforts of youths in bringing peace and tranquility in the country. Adding that every youth is gifted and talented in diverse ways, Madam Patricia Scotland urged the Youths to have a similar question in mind, “how can we build peace in our country”?
Patricia Scotland assured the Commonwealth’s readiness and availability to always assist their member countries. “Young people should be allowed to lead as they may have honest solutions to any problems” she advised.
Concluding her tour, Madam Patricia Scotland called for an inclusive and constructive dialogue as lasting solutions to the ongoing malaise in the two English speaking regions of the country. War, strife, disagreement and protest, she said, have never and will never be the solution to problems.
“Our young people are victims of violence and my call was to ensure a powerful plan for dialogue. There is always a call for dialogue but we end up seeing nothing, we really need this constructive dialogue because young people are dying at all levels and have a lot of problems as well. So there must be a dialogue and the youths must be included because they make up a majority of the country’s population and have contributed in the development of the country” Achaleke Christian pleaded.
It should be noted that before coming to the town of Legendary hospitality, Madam Patricia Scotland was at the country’s capital Yaoundé where she met with leaders of political parties represented at the parliament, civil society, commonwealth diplomatic community etc.

<https://thesunnewspaper.cm/commonwealth-secretary-general-brings-peace-message-buea/>

# **Cameroon – Anglophone Crisis: Supposed Activists on the run as Gov’t Intensifies Manhunt**

[January 22, 2018](https://thesunnewspaper.cm/cameroon-anglophone-crisis-supposed-activists-run-govt-intensifies-manhunt/)

**BY LUCY LIMA**

The lives of supposed Anglophone activists and activists from the North West and South West regions of Cameroon are in jeopardy as government intensifies crackdown on separatists fighters and search in the restive two English speaking regions. A good number of activists have been arrested and placed under dehumanising conditions in different detention centres across Cameroon, while many are reportedly on the run.
Those arrested are termed terrorists and levied several trump up charges including but not limited to propagation of false information, revolution, insurrection, secession and non-possession of National Identity Card. Meanwhile a good number of those on the run have been declared wanted with warrants of arrest issued against their names.
Last October 2016, Common Law Lawyers in Cameroon went on strike to protest the supposed annihilation of the Common law practice. Anglophone teachers joined the lawyers in the strike, November 2016, to decry government’s attempt to assimilate the educational system.
Government’s attempt to broker peace was futile as leaders of the strike actions termed government’s solutions as cosmetic with lack of good faith. This culminated in the arrest of some ring leaders like Barrister Nkongo Felix Agbor Balla and Dr.Fontem Neba January 17, 2017.
A series of events unfolded some youths later picked arms for “self defense” following governments declaration of war on separatists. All these led to the arrest of the President of the self-proclaimed state of Ambazonia Ayuk Tabe, in Nigeria on January 8, 2018 along with nine other members of his cabinet including Tassang Wilfred, Nfor Ngala Nfor and Barrister Eyambe Ebai.
This vexed youths, teachers and a cross section of population in the North West and South West region that they took to the street, January 15, 2018 to protest the arrest and extradition of Ayuk Tabe and his team. This protest was greeted by a repressive intervention by the military who used live bullets and tear gas on the aggrieved predominantly youth. Many sustained injury and a good number of youths and fathers were arrested and placed is inhumane prison conditions. Some of those arrested, later escaped and are still being hunted.
Buea-based Ako Formen Randdolf Maxwell, Denning Epie Njumbe,Mukete Iya Diwo,and some members of Buea Teachers Association (BTA) whose names are still to be confirmed are those alleged activists arrested during the January 15 protest and whisked to the Buea Central Prison. While in detention, reports have it that, they were denied access to family members and lawyers, except while going to courts. The SUN had it on good record that, Iya Diwo was in detention for several weeks during which she was molested, raped and placed under dreadful conditions alongside others.
A source, closed to the family, hinted that Iya was later released on a conditional bail alongside others but her health deteriorated such that she was hospitalised. While at the hospital, security officers are said to have stormed their Buea residence on several occasions. With this latest development, Mukete Iya Diwo smuggled herself out of the hospital and since then, her where about remains gloomy.
Recent statistics from civil society organisations has it that over 530,000 have been internally displaced in the North West and South West regions, over 1850 killed and least 50,000 registered as refugees in neighbouring countries, since 2016, when the crisis commenced.

<https://thesunnewspaper.cm/cameroon-anglophone-crisis-supposed-activists-run-govt-intensifies-manhunt/>

# **Anglophone crisis, sanctions may push MTN out of Cameroon**

[March 15, 2018](https://thesunnewspaper.cm/anglophone-crisis-sanctions-may-push-mtn-cameroon/)

By Elah Geofrey with additional reports from Journal du Cameroon

MTN Group Ltd on Thursday March 9, said it is considering investing in countries such as Cameroon, classified by the group as “conflict markets.
In a recent review on its markets across Africa and the Middle East, the mobile-phone company states that is doing a spring clean of its empire in these countries.
According to the Group Chief Financial Officer, Ralph Mupita, the company plans to take “appropriate action” if any of these countries are not cash-flow positive.

Regarding Cameroon, Mupita said MTN received a $6.6 million fine from Cameroon’s telecommunications regulator and a one-year reduction in its license term for allegedly not complying with spectrum and subscriber registration regulations.
Mupita also revealed that the company was also ordered to disconnect 3 million subscribers.“It’s a big priority to resolve this in the near term,” Mupita said. “If it’s not resolvable, then it’s not resolvable. We want to find an amicable resolution to stay.
Cameroon’s government, it would be recalled, had exhorted mobile companies including MTN, to cut internet from subscribers, in an attempt to douse protests from English speaking Cameroonians. Despite pressures from rights groups and international organisations against the ban, government remained adamant.
Government’s shutdown of internet in English speaking Cameroon had made life extremely difficult for millions of people in the country. Citizens in dire need of internet connectivity were forced beyond endurance to hunt for the high-tech communication technology in neighbouring cities making them to be tagged as internet refugees. The Internet blackout did not only slow down businesses but shut them out with associated heavy financial losses
A coalition of rights groups monitoring internet outage recently disclosed that Cameroon lost over $2.69 million during the internet shutdown.
Internet in Anglophone Cameroon, was partially restored on April 20, 2017, after three months blackout.
MTN Cameroon FY revenue falls due to lower subscriber base
MTN Cameroon’s total revenue in 2017 decreased by 6.6 percent on an organic basis to ZAR 5.38 billion, hit by the lower subscriber base and offset by 21.1 percent growth in data and a 27.4 percent rise in digital revenue. MTN still experienced a challenging operating environment, following the data shutdown and a slowdown in economic activity, which had a material impact on subscriber and revenue growth in the year.
The business suffered a number of operational challenges, too. The subscriber base closed the year at 7.1 million, after the disconnection of approximately 3.0 million subscribers in early October 2017 to comply with regulatory requirements on subscriber registration. The company had stated 9.45 million subscribers on 30 September and 9.87 million at end-2016.
Active Mobile Money customers increased 194.2 percent to 1.1 million, with revenue up 767 percent year-on-year
<https://thesunnewspaper.cm/anglophone-crisis-sanctions-may-push-mtn-cameroon/>

# **Kidnapped delegate pleads from captivity**

[March 13, 2018](https://thesunnewspaper.cm/kidnapped-delegate-pleads-captivity/)

 By Elah Geoffrey Mbongale
The North West regional delegate for social affairs, Animbom Aaron, who was kidnapped last February 25, 2018 in Batibo by suspected separatist fighters has in a video, allegedly released by the Ambazonia Defence Forces, called on the government through the Minister of Social Affairs to show the arrested Ambazonia leaders to the public so as to save his life.
The delegate who was seemingly in the same clothing as the day of his abduction said; “I am Animbom Aaron Yong, Regional Delegate of Social Affairs for the North West Region. I am pleading to the Minister of Social Affairs to intervene that the leaders of Ambazonia, that were arrested and we are told that they were brought to Yaounde, should be shown to the public to show that the people are alive, because I am here and they have given me 48 hours that I will be sacrificed if these leaders are not shown to be alive. I have been kidnapped by the ADF and I am pleading to the Minister of Social Affairs to intervene at the level of hierarchy so that my life can be spared.”
Animbom Aaron was kidnapped on February 25 in Batibo as he was returning from a funeral in the village, just over a week after the Divisional Officer for Batibo Marcel Namata Diteng was equally abducted on February 11 from the Grand Stand while preparing for Youth Day activities.
The whereabouts of the D.O of Batibo are still to be known as the military continues and extensive search for the two kidnapped officials.
The Ambazonia leaders including the self-proclaimed Interim president, of the virtual republic, Sisiku Ayuk Tabe were arrested in Abuja, Nigeria on January 5 during a meeting.
Since the arrest of these leaders, no one has been able to see them.
Communication minister had announced that they have been transferred to Cameroonian authorities and are doing well in a security prison in Yaounde. He promised that they will be tried according to the law and their rights will be fully respected.
However, apart from Minister Tchiroma’s declarations, no other confirmation of their presence in Yaounde has been registered as family members and lawyers have not had access to them as at now.
The arrest and subsequent transfer of the Ambazonia leaders resulted in further escalation of violence in the North West and South West regions characterized by attacks on military posts and reprisal killings by separatist fighters and the military

<https://thesunnewspaper.cm/kidnapped-delegate-pleads-captivity/>

1. **Real and fake Ambazonia fighters clash in Belo**

[April 3, 2018](https://thesunnewspaper.cm/real-fake-ambazonia-fighters-clash-belo/)

By Sah Terence Animbom
The Anglophone crisis has become an opportunistic affair as many persons are benefitting from the situation to become who they shouldn’t be or to get what is not meant for them. Because of the Anglophone crisis, persons have had top government positions, top administrative officials have reportedly inflated their bank accounts with cash, and many seemingly do not even want to see the crisis come to an end.
In the same light many separatists groups have come up with diverse ambitions that the Anglophone community is seemingly lost in the whole drama of hit and run, kidnappings and demand for ransom. In Belo sub division an armed robbery group is reported to be terrorizing the area in the name of Ambazonia Defense forces.
Between Monday March 21 to Sunday April 1, clashes have been reported between the supposedly genuine Ambazonian fighters and the armed gangs who pass for Ambazonian fighters in Belo sub division. Though the alleged killing of the later by the former is reported, there have been similar activities of kidnap and demand for ransom by the supposedly genuine Amba soldiers.
A councilor from the SDF run Njinikom Council, Bangha Mercy, wife to a Pastor was kidnapped on Tuesday March 27 at her Muloin residence in the presence of her husband by well armed men, believed to be separatist fighters in Boyo. They came to her residence and called her by name asking her to come out and surrender herself to the Ambazonia Defense forces.
When her Husband the pastor tried to ask if there was any problem they told him to stay off and that, they came for his wife. They gave the man of God a phone number and told him to prepare 1.5 million and bring to them.
His wife was ferried off on a motorbike to a destination that many believe to be Anyajua in Belo Sub division. Recounting her ordeal after her release the next day, after a ransom CFA 1million was allegedly paid, the councilor said she was not harmed and was not maltreated either. She says the camp where they are based has cooks and people to take care of those kidnapped.
It is also alleged that the Amba Boys went to her home after her release to ask her not to be scared of them and that they are not out to harm people but to defend them.
A driver who plies the Bamenda-Fundong highway narrated on Sunday morning to The Sun Newspaper the ordeal he and his passengers went through in the hands of the Amba Boys at Ashing in Belo sub Division at about 9:00PM on Saturday night on their way from Bamenda.
He said when they approached a very conspicuous speed brake located around the ST. Bede’s College Ashing Kom, they saw eight well armed men with machetes, axes, daggers, and guns who halted them and suddenly, one of them gave three loud slaps to his car with his machete sending shockwaves via the spines of every passenger.
The passengers were all asked to step out of the car and as soon as they stepped out they started handing over their belongings especially phones to the strange guys but shockingly they rejected the offer and told them they were not there to collect anything from anybody.
The armed men placed their machetes on all passengers as if to detect a signal and later told them to enter the car and leave. They told them that they are looking for someone but have not seen the person among them.
The only person who was brutalized is one man who allegedly recognized one of the Amba boys and out rightly called him by name and was given serious whips with the flat surface of the machete on the back as well as some very solid slaps. He was however allowed to continue his journey to Fundong.
Before letting them go they said they were aware that the passengers will inform the military of their presence at that location. They encouraged them to tell the military that they are waiting for them and that they should ask them to come quickly.
Certain parts of Anyajua in Belo sub division have become a no go zone for both military and some civilians considered by the separatist fighters to be traitors. It is said that the Amba boys feel very free in the community and hide from nothing or run from nothing which has caused many to be fleeing the community for fear of military invasion.

<https://thesunnewspaper.cm/real-fake-ambazonia-fighters-clash-belo/>

1. **Violence degenerates in Kupe Muanenguba, Lebialem**

[March 27, 2018](https://thesunnewspaper.cm/violence-degenerates-kupe-muanenguba-lebialem/)

By EBOB ARAH

The Lebialem and Kupe-Muanenguba divisions of the Southwest region have been at the center of violence throughout the week, where gun battles took over community life.

Gun exchanges between Cameroon’s defence forces and the Ambazonia fighters have been the order of the day, and this flared as councilors went to the polls on March 25 to vote senators.

Hundreds of troops have been stationed in Lebialem, in a bid to create a serene atmosphere, following recent attacks from the Ambazonia fighters.

However, this has met with stiff opposition, which heightened on Thursday March 22, when the Senior Divisional Officer’s convoy was attacked by the Ambazonian fighters. The SDO, Zakari Ungitoh was shot at, and the regional delegate of Lands killed on the spot, and others seriously wounded. Reports have it that the SDO is currently receiving treatment in Douala.

The entire population of Menji at press time, had vanished into thin air, as the totally deserted area is occupied solely by the military.

In Kupe Muanenguba, precisely Bangem, since the early hours of Friday March 23, it was reported that Ambazonian fighters made their way into the town, to prevent minister Elung Paul and his delegation from entering ahead of the senatorial elections. However, they were faced with the heavy military troops accompanying the minister, which eventually lengthened the gun exchanges right into the night. This exchanges it is alleged, let to the deaths of one civilian and a soldier.

On Saturday, calm seemed to have returned, but Sunday saw fresh violence which characterized the senatorial elections. Reports from Bangem say three civilians were gunned down. The terrified Bangem population disappeared into the bushes and other villages for safety.

The situation in Bangem became all the more worrying as politicians and administrative officials used the tense atmosphere to settle personal and political scores. Houses of particularly individuals suspected to be sympathizers of the separatist movement were allegedly pointed at by local political elites.

This was the case of a certain Mesumbe Epie Cirus, a local opposition leader and staunch critique of the local administration. Soldiers are said to have sprayed his house with bullets without warning.

Mesumbe told The SUN that when he heard gunshot rending the air in Bangem, he took refuge under his bed. He said he heard soldier yelling out his name and calling him out as a secessionist. His brother was not very fortunate as he sustained bullet wounds on his left arm.

Mesumbe told The SUN in a phone conversation that he managed to smuggle himself, with others through the bushes to leave the town. He is very confident that he was targeted because of his political affiliations and some of his utterances regarding the Anglophone crisis.

As at press time, the entire town of Bangem had reportedly been deserted and the population had emptied itself into nearby villages and bushes.

<https://thesunnewspaper.cm/violence-degenerates-kupe-muanenguba-lebialem/>

1. **In Bamenda: Peace re-echoed**

[March 13, 2018](https://thesunnewspaper.cm/bamenda-peace-re-echoed/)

By Sah Terence A.
While commemorating the 33rd edition of the international women’s day in the North West Region, Governor Adolphe Lele L’Afrique called on women to ensure their husbands and children avoid a further escalation of the anglophone crisis, by remaining peaceful. He warned that any further degeneration will put the woman in the most vulnerable position as she stands to suffer the most. He therefore appealed to the women to be promoters of peace and to continue to send their children to school.

The Governor enjoined men to stand by women and support them on the 50/50 parity by 2030 campaign and concluded by asking the women to register massively in Electoral registers in order to vote in the upcoming municipal, legislative and presidential elections.
Addressing the women, the President of Bamenda II women’s Network Mme. Mountessou Paulete Noel cautioned them to be aware that the women’s day is not a day for them to maltreat men or to scramble over women’s day fabric but to observe their achievements and chart a way forward.
She praised the efforts of government for ensuring equal opportunities for men and women alike, while asking for more, including positions like governor. She also requested that women too should be allowed to become traditional rulers, as she observed that in the whole of Mezam division, there was no female quarter head, talk less of a sub chief.
The event was spiced by some animation and the traditional march pass ceremony with some heads of services leading their respective services, like Prof. Theresia Akenji Nkuo of the University of Bamenda. The March pass that started at about 11:30 ended some 45mins later with an impressive show of fabric designs.
It is worth noting that the turn out of the women this year was quite impressive as compared to last year, given that there was tight security with military officers stationed all around the grandstand with some on roof tops.

<https://thesunnewspaper.cm/bamenda-peace-re-echoed/>

1. **Kumba-Buea Highway opens after five days of obstruction**

[June 26, 2018](https://thesunnewspaper.cm/kumba-buea-highway-opens-five-days-obstruction/)

By DANIELA NEBA NGUM
The Kumba-Buea highway has finally been made accessible thanks to the intervention of the military, five days after armed separatist fighters mounted barricades and obstructed the movement of persons and goods.
The highway was made open on Wednesday June 20, after numerous gun battles between the military and the separatist fighters.
Some passengers who opted for anonymity revealed that they spent close to four hours from Ekona to Kumba trying to assist the military to open the blocked areas. They added that it took them over two hours to un-mount the blockages in Mbalangi, Mbonge Sub-Division.
The queue of over one hundred vehicles preceded the military as they made their way into Kumba.
Trucks belonging to companies were reported to have been set ablaze by separatist gunmen and used thereafter to block the road.
There are also reported cases of unidentified lifeless bodies still lying on the sides of the highway.
Talking to some drivers, they lamented on the dangers they have been exposed to as a result of the continuous deteriorating Anglophone crisis. They revealed that they have been working hitch free since the road became operational though with some obstruction of close to an hour as a result of exchange of gunshots.
Some however, complained on the increased number of control posts on the road. This they noted goes a long way to slow their movements.
It should be recalled that, during the afternoon hours of Friday June 15, the said separatist fighters mounted barricades at various points of the road including Mbalangi, Bombe, Banga, Malende in Fako Division.
Vehicles which had to make use of the road were forced to turn back when they came in contact with the first barricade. Others who tried to negotiate their way in were still unable to sail through the numerous barricades.
Some passengers from Buea who were caught up in the middle of scene disclosed that they were forced to complete their journey on foot. Some spent couple of nights on the way before they got to Kumba.
Meanwhile, vehicles heading to Buea and other towns immediately reversed to Kumba when they got information about the obstruction.
Parks played host to the thousands of passengers who remained stranded for days. Some who had urgent issues to handle out of Kumba were forced to travel through the Kumba-Mamfe road though with an increase in transport cost of close to FCFA 15,000.
The blockage equally hindered the supply of goods of basic needs and food items in Kumba, as business persons remained stranded in Buea with their goods.

<https://thesunnewspaper.cm/kumba-buea-highway-opens-five-days-obstruction/>

1. **Family Members of suspected Ambazonian activist tortured to disclose brothers whereabouts.**

[June 5, 2018](https://thesunnewspaper.cm/family-members-suspected-ambazonian-activist-tortured-disclose-brothers-whereabouts/)

By Sah Terence Animbom

The continues escalation of the Anglophone crisis in the North West and South West regions of the Republic of Cameroon has continued to expose one nasty behavior of the military or the other each passing day. It is either the burning down of villages or the indiscriminate killing of civilians in what is always termed crossfire or the arrest, torture and incarceration of any citizen suspected of involvement with Ambazonian activists as was the Case of Amahngeh Elvis who was arrested in Fundong Boyo Division and transported to Bamenda the capital City of the North West Region in Febraury 2018 for suspected involvement with armed separatist fighters.

Mr Nges Jam, a man with disability which The SUN learnt was shot close to two months back and Yong Valentine together with another family member whose names The SUN Newspaper could only get as Nkwain were last week on Wednesday May 30, 2018 arrested from their family residence at Wonmbong Njinikom Sub Division where some houses were allegedly burnt by military about a month back and tortured in a bid to get from them the whereabouts of their brother Paul Ngong Njuakom a man in his mid forties who is accused of acting as liaison officer between the Southern Cameroons Liberation Ambazonian Activists in the Diaspora and the armed fighters in Belo Sub division which has become the hotbed of the Cameroon Anglophone Crisis.

Talking with relations of the tortured in Bamenda who chose to only talk of basis of anonymity, they told The Sun Newspaper that their brothers were arrested and tortured by military forces forcing them to give up the whereabouts of their brother Paul Ngong Njuakom whom The SUN was made to understand just recently returned from the United States of America. They said he was accused of sponsoring armed fighters on the ground and that he was also responsible for the distribution of propaganda messages during the October 1, 2017 mass protests that engulfed the Streets of the North West and South West regions of Cameroon, propagating for a free state of Ambazonia. A family Member told The SUN. “He was arrested on his way to Belo on April 6, 2017 and was detained for two weeks but was later freed after we paid more than One million Francs (1,000,000FCFA) as we feared he would be transferred to the Yaounde  Kondengui Maximum Security Prison.” Another Family Member told The SUN. “I know all this is because Paul just returned from the USA and the government hates all Anglophone Cameroonians in the US because of their involvement in the present socio-political crisis in the country.” She added.

The SUN also learned that a warrant of arrest had been issued about a week ago from the Legal Department in Mezam Bamenda, for the arrest of Paul Ngong Njuakom who is said to have escaped from police custody in Belo Sub division over a month ago.

Belo Sub Division has been ungovernable since February with all economic and social activities paralyzed since clashes between Separatist fighters and Government forces continue to ensue on daily basis. It is generally believed by Government and others that the separatist fighters in Belo get their financial support from the Diaspora which has so far been very involved in the present socio-political unrest in the Republic of Cameroon that has lasted close to two years now since its start in November 2016 with simple demands for reforms in governing policies by Lawyers and Teacher trade Unions.

It is the above believe that places Paul Ngong and many others in the fishing waters of government. It is worth recalling that the mother of a suspected Ambazonian activist by Name Amigo was arrested and tormented in Belo Sub division last April just in a bid to get her son’s whereabouts as was the case with Paul Ngong’s Relations.

If arrested, Paul Ngong and any one in a similar condition like his will be tried under the Anti Terrorism act of December 2014 passed to limit the spread of Boko Haram insurgents in the North of the country but now used as a weapon to suppress any socio political uprisings in the country especially the Anglophone Crisis.

Paul Ngong Njuakom at the moment is unreachable and all attempts to get to him through his pregnant Fiancee Shella have failed as she is highly worried and seemingly depressed. She retorted “leave my husband alone” almost bursting into tears and dropped her call when The SUN tried asking her more questions. This to note is just one of many cases of family separations that have been caused by the ongoing Anglophone crisis in Cameroon.

<https://thesunnewspaper.cm/family-members-suspected-ambazonian-activist-tortured-disclose-brothers-whereabouts/>

1. **North West population report military, separatists excesses to PM Yang**

[May 15, 2018](https://thesunnewspaper.cm/north-west-population-report-military-separatists-excesses-pm-yang/)

By Sah Terence Animbom.
The head of the North West Regional Permanent Delegation of the CPDM Central committee His Excellency Philemon Yang has concluded a six days working visit to the region, meeting with CPDM militants in all the seven divisions of the North West Region.
According to an unsigned press release supposedly issued by the committee, the Prime Minister’s visit had three main objectives which are one; to continue with the process of dialogue put in place by the head of state His Excellency Paul Biya, two; to call on all militants of the CPDM and all patriotic Cameroonians to be active participants in the fight against terrorism and other criminal activities, and three; to prepare the militants of the CPDM and all patriotic Cameroonians for the celebration of the National Day on May 20th 2018.

Meeting with CPDM big wigs of the permanent regional and divisional delegations as well as CPDM elected and appointed officials, section and sub section executive members of CPDM, WCPDM, and YCPDM, administrative authorities and traditional rulers, the PM had a chance to listen to the people air their worries freely.
People condemned in very strong terms the acts of vandalism and violence carried out by the military on innocent civilians in the region. They complained about the houses and property burned by the military that is supposed to protect them and ended by joining voices with the PM to condemn violence carried out against military personnel by Ambazonian activists, the killings on both sides, the kidnaps, arrests, ghost towns school boycotts to name but these.
In the divisions, the PM was appreciated for his frequent visits since the start of the Anglophone crisis. The CPDM militants saw these visits as a commitment on the side of the PM to look for solutions to the crisis. They ended each meeting with a motion of support to the head of state Paul Biya referring to him as their natural candidate.

<https://thesunnewspaper.cm/north-west-population-report-military-separatists-excesses-pm-yang/>

1. **Gov’t intensifies crackdown on organisers of teachers’ strike**

[May 14, 2018](https://thesunnewspaper.cm/govt-intensifies-crackdown-organisers-teachers-strike/)

***From Chinje Hopeson in Bamenda***

As the crisis rocking the North West and South West regions, which has morphed into an armed conflict, rages on, the government is intensifying its crackdown on all those suspected to have been among the organisers of the teachers’ strike in the restive English-speaking regions.
In this light, security operatives have been rounding up these teachers. Sources say the arrested teachers are being tortured and detained under horrendous and inhuman conditions. Some have reportedly died in detention. This has caused some of them to flee into hiding and the whereabouts of many is not known.
It is worth recalling that the Anglophone crisis, something that pundits say had been brewing for several years, boiled over in 2016 when Common Law Lawyers in the North West and South West regions went on strike, paralyzing the courts. They were demanding for a return to the federal system of government, redeployment of Civil Law Magistrates back to Civil Law Courts among other grievances. Not long after, teachers in the North West and South West regions also went on strike, demanding the redress of several issues concerning the English sub-system of education.
Things got worse when concerned citizens in the North West and South West regions, who had been fed up with the unfavourable political and especially economic stagnation of Cameroon at large, but more importantly in these regions, joined the strike.
But after negotiations with the teachers and lawyers ended in deadlock, the government banned the Southern Cameroons National Council (SCNC), and the Cameroon Anglophone Civil Society Consortium (CACSC). Some of the leaders of the Consortium such as Barrister Felix Agbor Nkongho, president of Fako Lawyers Association (FAKLA) and Dr. Fontem Niba, Secretary General of SYNES UB were immediately arrested while others such as Barrister Bobga Harmony, president of North West Lawyers Association (NOWELA), and Tassang Wilfred, Executive Secretary of Cameroon Teachers Trade Union (CATTU), and Tame Valentine, President of Teachers Association of Cameroon (TAC) fled into hiding.
But as the crackdown on the activists escalates, several cases have been reported.
One of such cases is that of Enow Napoleon Tiku, publicity secretary of the Teachers Association of Cameroon (TAC) for the South West region. Being among the key teachers opposing the educational policy of the government, Enow Napoleon Tiku played a major role in the orgainsation of the teachers strike in the South West region.

His involvement in the strike actions led to the issuing of a warrant of arrest for him on May 3, 2018. On May 5, 2018, he was arrested and detained at the mobile police unit in Buea. Lawyers representing him filled for bail on May 6, 2018.
However, on May 11, 2018, while the bail was still pending, Enow Napoleon Tiku escaped from detention under unclear circumstances. Since then the police and other security forces have launched a manhunt for him.
The security forces are said to be bent on tracking down Enow Napoleon Tiku. If arrested, he will be tried under the anti-terrorism law whose maximum penalty is the death sentence. That is if he is not killed outright like others who have suffered from extrajudicial killings.
It worth noting that the crisis in the North West and South West regions has left many killed, others internally displaced with some living in bushes while several thousands have fled to unknown destinations. Several thousands have crossed over to neighbouring Nigeria where they are living as refugees.
While the Anglophone crisis continues to escalate, international organisations and other western powers have called on the government to address the root cause through dialogue.

<https://thesunnewspaper.cm/govt-intensifies-crackdown-organisers-teachers-strike/>

1. **Man brutally Killed For Allegedly Lodging Amba Fighters**

[May 8, 2018](https://thesunnewspaper.cm/man-brutally-killed-allegedly-lodging-amba-fighters/)

BY TALLA AGHA CHRISTOPHER

A man whose name we got as Pa Ketuanze Tangu Phillip is reported to have been brutally murdered by security officers for allegations of lodging what has been termed Ambazonian Fighters. The recent event comes to add to the number of persons roasted in their houses in the North West and South West Region of Cameroon since the escalation of the Anglophone Crisis in 2016. The victim is the owner of an 8 apartment house with many tenants and was accused of keeping terrorists in his house. He was kidnapped and later discovered dead in the bush some days after Before his abduction, he had been arrested a number of times and interrogated at the police and gendarme station. The victim’s wife and his brother had also been arrested sometimes before they went into hiding after their release.

Surviving family members reveal that his son Ketuanze Micheal Teba is somewhere in between Thailand and Canada battling for survival for fear of the unknown back in Cameroon.

The family lawyer, who preferred to remain anonymous due to the manhadlement of lawyers in the beginning of the Anglophone crisis, says the family is going through the most traumatic circumstances anyone would want to find themselves.

As far as Ketuanze Micheal is concerned, the legal advicer of the family cautions him to stay away for some time till the crisis gets to resolution stage. Meanwhile the arrested leaders of the Ambazonian Interim Government are yet to be made public as many fear they too have been killed.

The Cameroon Government had however disclaim that allegation from the very beginning but have failed to show where they are.

In the light of the foregoing, Cameroon’s leading peace crusader and rights promoter, Ntumfor Barrister Nico Halle is on President Biya’s neck, pressing for the release of the detained Anglophones.

The Bar Council General Assembly president, Ntumfor Barrister Nico Halle is reported to have pleaded with the President of the republic to cause him release those incarcerated for some time now.

The legal luminary cum peace crusader is calling on the president of the republic, Paul Biya to use his magnanimity as the guarantor of peace, national unity and national integration to grant amnesty to the detainees and call off the investigation of others so that those who have fled the country and others who are in hiding can return for genuine dialogue on the Anglophone problem to be held.

“Peace is the most precious thing in every nation, that is why I am pleading and praying, as a peace crusader, that the head of state should extend his magnanimity as he has already shown by announcing those salutary measures to the lawyers and teachers and the restoration of internet in the North West and South West regions”, Barrister Nico Halle told The SUN through a telephone interview.

He furthered that the unconditional release of the Anglophone detainees and an end to the crackdown of others who have either left the country or are in hiding will automatically ease the current tension and give room for genuine dialogue that will enhance national unity.

<https://thesunnewspaper.cm/man-brutally-killed-allegedly-lodging-amba-fighters/>

1. **Unrest in NW, SW: Another week of Killings, kidnappings, burnings**

[May 3, 2018](https://thesunnewspaper.cm/unrest-nw-sw-another-week-killings-kidnappings-burnings/)

By ELAH GEOFREY MBONGALE
The escalating crisis in the North West and South West regions of the country has shifted gears over the weekend with unending episodes of gun battles between gunmen believed to be separatist fighters and the military on multiple fronts.
These clashes were accentuated by brutal killings, lootings, burning of civilian homes as well as abductions. Civilians have been caught in the crossfire leading to untold suffering. Many are now internally displaced and have left their communities for the (dis)comfort of the bushes.
Munyenge and Bafia, both localities under Muyuka sub-division in Fako witnessed serious clashes over the weekend between separatists and the military. The population deserted the villages while the unfortunate ones were either caught by bullets or arrested by the military.
A particular case caught the attention of the public after a video surfaced on social media showing a helpless middle-aged man struggling on the ground with a leg that had apparently been shattered by bullets. The young man would be indentified as Michael Modika, a deaf and dump in Munyenge who was obviously oblivious of what was happening when he strayed into the path of military bullet.
Modika was trapped in the village as the military reportedly blocked all movements of cars and persons in and out of Munyenge-Muyuka.
Modika sadly had his leg amputated almost 48 hours later owing to the delayed medical attention to it as the leg was rotting off. He is now under very intensive medical care at a certain health unit in Kumba under the care and supervision of the Ayah Foundation-A foundation that has been coming to the aid of victims of the Anglophone crisis.
In Bafia, a locality close to Munyenge, some of the villagers who had fled into the forest after the military invasion returned to a scourged village. Several houses were set ablaze, reportedly by the military.
Another video surfaced over the weekend of what could be seen as military officers setting a house on fire in a locality that has now been identified as Azi in Lebialem.
Government is yet to make a statement regarding the video which many have quickly attributed to the Cameroon military which has been accused in the past of setting other villages on fire like in Kwa Kwa, Bole and other areas.
Separatists have also been accused in the past of setting public structures like schools, control posts and police stations ablaze.
Serious clashes were also reported in other areas like Wabane in Lebialem, Nyasoso in Kupe Muanenguba, Bekora near Lobe in Ndian in the South West region with casualties reportedly recorded on both sides.
In Bali, in the North West region, a military commander and a soldier were reportedly killed by armed men claiming to be separatists.
Reports which The SUN could not immediately verify suggests that the supposed separatists stole a goat and plantains belonging to a local. The person then reported the matter to security forces. When the military commander and another officer tried to intervene in the matter, they were reportedly ambushed and killed.
The man who reported the goat and plantain theft is said to have been arrested for further questioning meanwhile the killers are at large.
The incident forced the population of Bali to flee to other parts and into the bushes for fear of being victims of military reprisal.
In Kom, a Catholic priest, Principal of St. Bede’s college was reportedly abducted on Monday, April 30 when he was at mass with his students in Ashinkom.
St. Bede’s was the only college still effective in the area. The principal’s abduction has forced the lone operational school in the area to close as parents poured in after the news to collect their kids.

<https://thesunnewspaper.cm/unrest-nw-sw-another-week-killings-kidnappings-burnings/>

1. **Gov’t intensifies crackdown on SCNC activists home and abroad**

[May 3, 2018](https://thesunnewspaper.cm/govt-intensifies-crackdown-scnc-activists-home-abroad/)

By Simon Ndive Kalla
As the Anglophone crisis, which has now spiraled into an armed struggle, worsens in the North West and South West regions of Cameroon, the government has intensified its efforts to crack down on activists of the Southern Cameroons National Council (SCNC) and other activists both within and without the country.
The government has always accused SCNC members and other Anglophone secessionists in the diaspora of propelling the Anglophone crisis; which the government has labelled as “terrorism”. The Minister of Communication, Issa Tchiroma Bakari, earlier emphasised that, the government will not dialogue or negotiate with terrorists. Sources have revealed that, the government is using its diplomatic networks to ensure that SCNC members and other Anglophone activists abroad are tracked down and extradited.
It should be recalled that, leading members of the separatist movement: Nfor Ngala Nfor Chairman of the SCNC, Sessekou Ayuk Julius Tabe, the Nigeria-based president of the Southern Cameroons Governing Council, were arrested in January 2018 alongside others at a hotel in Abuja, Nigeria. They were later extradited to Cameroon where they have been detained incommunicado.
After releasing a list of Anglophone activists in the Diaspora, who were targeted for arrest some time ago, sources say a fresh list of SCNC members and other activists abroad has been re-established for arrest; more than a hundred names have reportedly been given to intelligence services.

We learnt from informants that after several meetings held in Yaounde in a bid to seek ways to neutralise the growing Anglophone activism both within and without the country, a bigwig of the regime was sent on a mission abroad to bribe his way in causing the UN and other diplomatic services to frustrate the Anglophone struggle by neutralising those in the Diaspora via their arrest and extradition.
This move by government, is reported to be one of the reasons which sparked widespread protests of Anglophones in the United Kingdom (London) during the Commonwealth Heads of Government Meeting 2018. During the protests, SCNC members in the UK called on the Commonwealth to force the government of Cameroon to demillitarise the North West and South West regions, stop the ongoing mass killings of Anglophones and also to expel Cameroon from the Commonwealth.

The London protest is alleged to have been organised by UK-based newly elected SCNC Chairman, Robert Tamanji, alongside other members like: Ivo Kuka, Catherine Yambo, Omawah Elenor Charlotte Oyebog, Alain Bougan, amongst others.
The country is now considered unsafe by many Anglophones in the diaspora who fear arrest or death if they return to the country.

**Origin of crisis**
It is also worth recalling that the Anglophone crisis, something that pundits say had been brewing for several years, boiled over in November 2016, when Common Law Lawyers in the North West and South West regions went on strike. They were demanding for the return of the federal system of government, redeployment of Civil Law Magistrates back to Civil Law Courts in French Cameroon, among other grievances. Not long after, teachers in the North West and South West regions also went on strike, demanding for the redress of several issues concerning the English system of education.
Things, however, got worst when Anglophones in both regions, who had been fed up with the unfavourable political and economic situation of the country, the use of French as the dominant and official language, and the marginalisation of the Anglophones, joined the strike.
The strike was met with brutal repression by the military which has today escalated into an armed conflict between the two camps with the rise of the “Ambazonian Self Defence forces”. Today it is estimated that over 20,000 Southern Cameroonians have fled the country to neighbouring Nigeria, thousands of internally displaced people have fled into bushes/forests, and hundreds are being detained and many others missing. A huge number of civilian and military casualties have also been recorded.
While the Anglophone crisis continues to escalate, International Organisations and other Western powers have called on the Government to address the root cause of the crisis through dialogue, also, prominent Anglophone lawyer and human rights activist, Barister Nkongho Felix Agbor Balla, has called on the Government to dialogue, and to release all Anglophones unlawfully detained and imprisoned.

<https://thesunnewspaper.cm/govt-intensifies-crackdown-scnc-activists-home-abroad/>

**Pregnant women beg NW Governor to uplift curfew**

[July 5, 2018](https://thesunnewspaper.cm/pregnant-women-beg-nw-governor-uplift-curfew/)

[Steve](https://thesunnewspaper.cm/author/angustephen/)

[No Comments](https://thesunnewspaper.cm/pregnant-women-beg-nw-governor-uplift-curfew/#respond)

By Moma Sandrine
Some pregnant women in Cameroon’s North West Region have decried the unending curfew ordered by Governor Adolf Lele L’Afrique when the Anglophone crisis metamorphosed into an armed rebellion.
“I fear for what may befall me should I start to labour after 9pm. How do I transport myself to the hospital?” a pregnant woman wondered aloud as she explains the ordeal pregnant women go through after 9:00pm.
Others narrated the experience they had as they were caught in labor pains after 9pm. “It was at about 9:30pm that I started feeling some sharp pains around my waist. I realized it could be labour pains. In that confusion I wondered what to do next. As I was packing my emergency bag, it dawned on me that I had a friend who works at the regional hospital. This friend helped me call the ambulance. That is how I managed to reach the hospital safely. I was lucky because I had the connection. I wonder what happens to other women trapped in such a condition,“ Emelda, a nursing mother told The SUN.
Another lady who had just been delivered of a baby girl recounted her own experience to this reporter: “I started experiencing labour pains at about 11:00pm so I woke my mother to take me to the hospital. Since it was within curfew hours, my mother took me to a nearby clinic. When we got there, the nurses couldn’t handle my case properly so we were left with no choice than to go to the general hospital. My mother, landlady and my brother accompanied me to the general hospital from Nacho quarter. Since neither cars nor bike ply the streets after 9:00pm, we had to trek to the hospital. Even with the pains I had no choice than cover the distance on foot. As we approached the hospital, we were stopped by some military officers just some few meters before the maternity gate. We were asked to stop and carry our hands up, which we obeyed. We were then asked where we were going to. We told them we were heading for the maternity. They later asked us why we had to go only at that hour. I told them the labor pains were unbearable. They later asked us to run and get out of their sight. We then hurried and got to the hospital and I was delivered of my baby an hour later. It was a stressful and terrifying experience, I must say.”
The SUN equally gathered that a lady almost put to birth at home because she was waiting for the time to clock 6am before she could go to the hospital. Some nurses said that they had received cases where women get complications because they laboured for several hours before rushing to the hospital for proper check up.
These are just a few among many other women who recounted to The SUN their labor experience during curfew hours. According to most of them, the curfew should be uplifted for their sake because labor pains most often start at night. To them, it will be a great relief if the curfew placed on the North West Region is uplifted.
The curfew was placed by North West Governor on February 10 following several killings of military officers and civilians coupled with kidnaps of government officials in the region. Since then it has been renewed indefinitely.

<https://thesunnewspaper.cm/pregnant-women-beg-nw-governor-uplift-curfew/>

1. **Security forces shoot, kill Catholic seminarian in Bamessing**

[October 11, 2018](https://thesunnewspaper.cm/security-forces-shoot-kill-catholic-seminarian-bamessing/)

By Moma Sandrine
Amidst the prevailing crisis in the North West Region of Cameroon, series of deaths are recorded on almost a daily basis. On October 1, 2018, two mad people were gunned down between Hospital Roundabout and Azire Old Church Quarter. These are just a few spotted lifeless bodies amongst the numerous deaths resulting from the crisis within the region.
On October 4, the Catholic Church again had to mourn the transition of one of theirs from this world to the land of the dead. Gerald Akiatah, a seminarian of the Archdiocese of Bamenda was shot by police officers at Bamessing few minutes after morning mass. Reports say he was shot in the neck at the church premises, where he gave up the ghost shortly afterwards.
Although this reporter could not lay hands on the exact reason why he was shot, unconfirmed sources say that he did nothing but obeyed the said police officers who ended up sending him on an errand to the land of his ancestors. The late Akiatah, a native of Njindom was in Bamessing preparing to go for his pro-paedeutic year in the spiritual Centre in Bafut, to continue his studies in becoming a Catholic priest. The aspiring priest had just completed from St Aloysius Minor Seminary Kitwum in June this year.
Following the demise of the young Seminarian, some priests and members of the Catholic Church set out on October 5 to get the mortal remains of their fallen brother. On their way, they were intercepted by the military and asked out of the ambulance then were told to return to where they were coming from. One of the military while speaking to the priests in French remarked “the men of the Catholic Church are all Ambazonians. We know you all including your Cardinal and all the Anglophone bishops”. Since all efforts to plead with the military were futile, the priests returned reluctantly hoping to go for the mortal remains on a more convenient day.
Since the start of the Anglophone crisis in the North West and South West regions of the country in 2016, at least 26 Roman Catholic priests have been victims of the excesses of security forces. To this effect, religious bodies have continued to make calls for prayers all over the nation so that peace can return to the country

<https://thesunnewspaper.cm/security-forces-shoot-kill-catholic-seminarian-bamessing/>

1. **Families Of Diaspora Protesters Back Home Suffer Attack**

[October 5, 2018](https://thesunnewspaper.cm/families-diaspora-protesters-back-home-suffer-attack/)

By Ikome Christie-noella Eposi in Buea

Family members of some Cameroonians who have been identified as those who led protests rallies across the globe on October 1 demanding for the Independence of Southern Cameroon have not been facing it easily back home from the hands of the military.

The case is worst for one of the Diaspora protesters whose name we obtained as Agendia Calistus Benzankeng whose brother before his desmise was living at Muyenge in the Muyuka sub-Division was shot dead by the military.

Atem Lawrence Benzankeng, the brother of Agendia Calistus who resides in Belgium is said to have been killed and buried without the knowledge of his relatives.

Agendia who has spent most of his life in Belgium has not been in the good books of the state.

Their house in the village alongside others, were razed by fire and inhabitants of the village are reported to have taken refuge in the bushes while others have become internally displaced persons.

With the current fighting between separatists groups and the Military, youths, especially young men have become targets as many move to join  the separatists fighters who are battling tooth and nail for the restoration of the Southern Cameroon Statehood.

Farmlands which were cultivated for sustenance have all been destroyed living the masses in perpetual hunger.

The state has launched a massive crackdown for any, once identified as being part of any demonstration home and abroad in relation to the Anglophone Crisis.

In January 2017, the Government banned the Southern Cameroon National Conference, the SCNC and the All Anglophone Civil Society Consortium.

Its leaders were all arrested and later released after spending eight months in the Yaounde  Kondengui Maximum Security Prison.

It should be noted that the ongoing crisis in the North West and South West Region of Cameroon has led to the arrest and illegal detention of a good number of youth protesters while a good number of them have either gone in to hiding or have fled the country to unknown destinations.

Serious checks and searches are also mounted at the airports and seaports to track down suspected protesters who try to enter the country.

The fear is that those of them who have been abroad for long are financing the struggle back home and their return may either be to continue financing it or taking up arms and join the separatist’s fighters.

It should be noted that persons who are involved or arrested in such circumstances are termed terrorists and are punished according to the 2014 Anti Terrorism Law which carries a sentence of 25 years to life imprisonment and at worst, a death penalty.

For the fear of the long arm of this law which has been termed by Human Rights group as being unfair, most Cameroonians abroad have decided to stay in hiding than to come back home and face the dreaded law where civilians are tried in the military courts.

<https://thesunnewspaper.cm/families-diaspora-protesters-back-home-suffer-attack/>

1. **Campaigns take-off amid bans, bullets, bloodshed**

[September 25, 2018](https://thesunnewspaper.cm/campaigns-take-off-amid-bans-bullets-bloodshed/)

By Atia Tilarious Azohnwi
Campaigns ahead of the October 7 presidential elections in Cameroon kicked-off Saturday, September 22 through the width and breath of the country and in the Diaspora. It was characterised by bans, bullets and bloodshed.
Residents across major cities and towns in the country woke up to see campaign posters and banners of candidate Paul Biya – the posters and banners of the CPDM candidate are also displayed across the conflict-hit North West and South West Regions.
This year’s race to Etoudi has witnessed a significant drop in the number of candidates, nine in total unlike in 2011 that had 23 candidates. The candidates include Biya Paul (CPDM), Garga Haman Adji (ADD) Kamto Maurice (CRM), Cabral Libi Li Ngue (Univers), Akere Muna (PFD), Matomba Serge Espoir (UPSR), Adamou Ndam Njoya (CDU), Ndifor Afanwi Franklin (MCNC) and Joshua Osih (SDF).

**Kamto dares Douala IV DO**
The DO for Douala IV issued an order banning the planned rally of the Cameroon Renaissance Movement party flag bearer, Maurice Kamto.
Ekoa Mbarga Jean-Marc cited the non-respect of article 93 Section 3 of the Electoral Code which states that the administrative official must be notified for any meeting at least 24 hours to when it is scheduled.
[truncated: 216,393 more chars]
