# Supplementary material
Source: Research Square preprint supplement (doi:10.21203/rs.3.rs-8545290/v1)
Supplement: Supplementary file 10 [file d7fc3bf8bb929f46e936bf0d.docx]

| 1/21/2023 4:46 AM | | | | | | | |
| --- | --- | --- | --- | --- | --- | --- | --- |
| Source Summary | | | | | | | |
| PHD Thesis Coding | | | | | | | |
| 1/21/2023 4:46 AM | | | | | | | |
| **Total Words in Source** | **Total Paragraphs in Source** | **Number of Nodes Coding Source** | **Coded Percentage of Source** | | **Number of Text References** | **Number of Audio Video References** | **Number of Image References** |
| **Document** | | | | | | | |
| **Internals\\237 online** | | | | | | | |
| 129496 | 3611 | 12 | 0.1766 | | 132 | 0 | 0 |
|  | | | | | | | |
| **Internals\\Bamenda Online articles** | | | | | | | |
| 83538 | 2597 | 12 | 0.0808 | | 74 | 0 | 0 |
|  | | | | | | | |
| **Internals\\Cameroon Tribune** | | | | | | | |
| 127330 | 1044 | 12 | 0.2669 | | 262 | 0 | 0 |
|  | | | | | | | |
| **Internals\\EcoMatin** | | | | | | | |
| 23329 | 437 | 9 | 0.1335 | | 31 | 0 | 0 |
|  | | | | | | | |
| **Internals\\Eden Newspaper** | | | | | | | |
| 46814 | 1195 | 9 | 0.1010 | | 61 | 0 | 0 |
|  | | | | | | | |
| **Internals\\La voix du centre** | | | | | | | |
| 39102 | 979 | 12 | 0.1425 | | 48 | 0 | 0 |
|  | | | | | | | |
| **Internals\\the post newspaper** | | | | | | | |
| 35155 | 1072 | 11 | 0.1249 | | 43 | 0 | 0 |
|  | | | | | | | |
| **Internals\\the sun newspaper** | | | | | | | |
| 97069 | 2610 | 12 | 0.2250 | | 126 | 0 | 0 |
|  | | | | | | | |
|  | | | | | | | |
| Reports\\Source Summary Report | | | | Page 1 of 1 | | | |
