# Supplementary material
Source: Research Square preprint supplement (doi:10.21203/rs.3.rs-8545290/v1)
Supplement: Supplementary file 11 [file e816e580ed264e033711c5e4.docx]

1. **Cameroun – « Les anglephones » cibles de la police camerounaise dans la ville de Yaoundé**

Par

[**La Voix du Centre**](https://lavoixducentre.cm/author/lavoixducentre)

 -

30 septembre 2017

[0](https://lavoixducentre.cm/cameroun_les-anglephones-cibles-de-la-police-camerounaise-dans-la-ville-de-yaounde#respond)

168

Le 30 septembre 2017 la police et la gendarmerie ont procédé à de nombreuses fouilles et arrestations dans la ville de Yaoundé (Biyemassi, Melen, Obili, Briqueterie, Centre administratif et Etoug-Ebe). Des secteurs de la ville occupés majoritairement par les ressortissants de la région du Nord-ouest et du Sud-Ouest. Des citoyens anglophones ont été pris à partie et humiliés par les forces de l’ordre. Les plus ciblés sont de jeunes hommes anglophones qui ont été battus et accusés de complicité avec les sécessionnistes. Contrains par les forces de l’ordre à passer aveux sous intimidations d’appartenir à ce groupe.

L’une des victimes relate «je vis à Yaoundé depuis plus de 3 ans, et je suis étudiant dans une école de la place. Etre traité de la sorte juste parce que je suis anglophone me fait mal, est-ce un crime de l’être?».

Quels sont les réalités quotidiennes que traversent ces personnes originaires des régions du Nord-ouest et du Sud-ouest depuis le début de la crise sécuritaire dans ces zones ?

                                                                          Amayeneh Massia Thérèse Fernanda

<https://lavoixducentre.cm/cameroun_les-anglephones-cibles-de-la-police-camerounaise-dans-la-ville-de-yaounde>

1. **Le cri de détresse des évêques fait écho sonore**

Par

[**La Voix du Centre**](https://lavoixducentre.cm/author/lavoixducentre)

 -

25 mai 2018

*Dans un communiqué laconique signé le 16 mai dernier par Mgr Samuel Kleda, président de la conférence épiscopale nationale du Cameroun et adressé à tous les Camerounais et aux hommes de bonne volonté; les prélats prônent le dialogue, la réconciliation et la paix. Mais le document fait jaser.*

A peine publiée, la nouvelle  se répand comme une traînée de poudre à travers les réseaux sociaux alimentant toutes les conversations jusque dans les chaumières. Ce document intervient au moment opportun de notre vie politique : la célébration du 20 mai, fête de l’Unité Nationale. C’est tout dire. L’objectif inavoué de l’Eglise catholique qui est au Cameroun, c’est de faire entendre sa voix afin de dénouer le fil du dialogue pour la paix. En prélude à la fête nationale du 20 Mai, une  Neuvaine nationale de prière pour la paix dans le pays a débuté le 11 et s’achève le 19 mai sous la houlette de l’épiscopat Camerounais.

Le Cameroun traverse depuis un certain temps une crise économique qui frappe également  tous les pays de la Communauté Economique et Monétaire de l’Afrique Centrale (CEMAC). Sans perdre de vue, le chômage des jeunes et les détournements des deniers publics, monnaie courante. « La minorité anglophone, qui représente environ 20% des 22 millions de Camerounais, proteste depuis novembre 2016. Pendant ce temps, l’armée camerounaise est déployée dans la région de l’extrême-nord du pays pour lutter contre les incursions, depuis le Nigeria, des combattants du groupe jihadiste Boko Haram, qui a fait quelques  2000 morts, civils et militaire depuis 2014 », Selon le centre d’analyse International Crisis Group (ICG).

Pour le saint siège « à l’heure où le Cameroun est secoué par cette crise, dialogue, unité nationale et paix sont dans l’air du temps et devraient correspondre aux idées politiques ». Les évêques du Cameroun demandent donc aux fidèles, « d’aller au-delà des mots et d’accompagner par la pénitence et les œuvres de miséricorde cette prière spéciale pour la paix qui débouchera sur la Pentecôte et aussi sur la fête de l’unité nationale du Cameroun qui se célèbre le 20 mai». Avant d’ajouter « nous estimons qu’une médiation s’impose maintenant pour une sortie de crise, épargnons notre pays d’une guerre civile inutile ».

En rappel, le 14 avril dernier, alors que s’achevait à Yaoundé leur 43e assemblée plénière, les évêques ont publié un communiqué fort appelant à se « mobiliser pour un Cameroun paisible ».

**Jo Benga**

<https://lavoixducentre.cm/le-cri-de-detresse-des-eveques-fait-echo-sonore>

1. **Une célébration ensanglantée**

Par

[**La Voix du Centre**](https://lavoixducentre.cm/author/lavoixducentre)

 -

26 mai 2018

[0](https://lavoixducentre.cm/une-celebration-ensanglantee#respond)

165

*C’est entre tuerie et enlèvement que s’est célébrée la 46e édition de la fête de l’unité nationale dans les régions anglophones du Cameroun.*

Le bilan s’est alourdi ce dimanche 20 mai 2018 dans les régions anglophones après une série d’attaques perpétrées par les présumés sécessionnistes. Au moins trois morts et six blessés au sein des forces de sécurité et de défense d’après le site d’information journalducameroun. Les assaillants ont attaqué la ville d’Ekona, département du Fako, dans la région du Sud-ouest aux environs de 5h30. Des présumés sécessionnistes ont pris d’assaut le poste de police de cette localité. Pendant ces affrontements, on a enregistré la mort de l’officier Moulong Azang, qui a été blessé pendant des heurts et a succombé à ses blessures. Deux militaires ont également été blessés. Du côté du commandement central du groupement mobile d’intervention de la police (CCGMI), on a enregistré un blessé, lors d’un accident causé par l’huile de moteur versée en route par les assaillants alors qu’ils avaient été envoyés en renfort à Ekona. D’autres attaques ont visé ce même jour, le poste de l’armée à Nkongle, Konye, Andek dans le Nord-ouest, le poste de péage de Banga Bakundu et la brigade de gendarmerie de Tinto. Pendant ces attaques, deux soldats ont été tués et trois blessés.

A Banguem dans le département du Kupe et Manengouba dans le Sud-ouest, le maire de la ville et son adjoint ont été enlevés. Une vidéo qui a été publiée par les séparatistes a circulé sur les réseaux sociaux montrant le maire et son adjoint. Du côté de Kumbo et Buéa, les populations ont célébré la 46e fête de l’Unité nationale en mode « ville morte ». Ici, l’effervescence des célébrations n’est pas partagée.

Rappelons que depuisuis le mois d’octobre dernier, ces villes ont été le théâtre des affrontements entre les éléments des forces de défense et de sécurité camerounaises et les groupes armés sécessionnistes.  Selon les sources officielles, près d’une quarantaine de soldats et environ 120 civils ont déjà été tués lors des affrontements dans les régions anglophones du Cameroun. L’Organisation des Nations Unies parle de 160.000 personnes déplacées depuis le début de la crise.

**MG**

<https://lavoixducentre.cm/une-celebration-ensanglantee>

1. **Mesures sécuritaires – Vigilance accrue dans toutes les régions du pays**

Par

[**Andre Faycal Libock**](https://lavoixducentre.cm/author/libockandre)

 -

11 juin 2018

[0](https://lavoixducentre.cm/mesures-securitaires-vigilance-accrue-dans-toutes-les-regions-du-pays#respond)

117

**Dans un document signé du délégué général à la sûreté nationale (DGSN), Martin Mbarga Nguele prescrit des dispositions fortes sur instruction de Paul Biya en vue de renforcer le contrôle de la circulation routière.**

Sur « très haute instruction du président de la République du Cameroun, les délégués régionaux sont invités à prendre des mesures idoines en vue de renforcer sans tracasseries inutiles le contrôle de la circulation routière des véhicules administratifs et militaires (…) vérifier systématiquement les dossiers des voitures, identifier de manière efficiente leurs occupants et rendre promptement compte tout fait digne d’intérêt ». C’est globalement en ces termes que se résume la note du DGSN datant du 30 mai 2018. Une nouvelle mesure dans le but d’éviter la pénétration opportuniste sur le territoire des matériels mais surtout des personnes jugées dangereuses pour la paix et la stabilité du Cameroun.

Même si le message est portés aux délégués des dix régions du pays, tout porte à croire que cette décision s’est prise suite à la crise sécuritaire qui prévaut dans les deux régions anglophones du pays. Car il a été dit à plusieurs reprises que les activistes de ces régions recherchent le plus souvent lors des agressions des armes, munitions et d’autres moyens logistiques pouvant appartenir aux forces de défense et de sécurité. Ces recommandations, ont été très vite appliquées par le gouverneur de la région du Sud-ouest. Bernard Okalia Bilai a demandé aux préfets, commandants de légion de gendarmerie et chefs d’unités de la police de réinstaurer les entrées et sorties des centres urbains de cette région. Selon ce dernier, ces mesures constituent une réponse aux récentes attaques perpétrées par les sécessionnistes.

**MFI**

<https://lavoixducentre.cm/mesures-securitaires-vigilance-accrue-dans-toutes-les-regions-du-pays>

1. **Elections législatives et municipales – Vers une prorogation de mandat**

Par

[**La Voix du Centre**](https://lavoixducentre.cm/author/lavoixducentre)

 -

18 juin 2018

[0](https://lavoixducentre.cm/elections-legislatives-et-municipales-vers-une-prorogation-de-mandat#respond)

9

Dans un document signé du président de la République adressé au président du Sénat le 13 juin dernier, Paul Biya propose à Marcel  Niat Njifenji de réunir le bureau du Sénat afin de le consulter au sujet de la prorogation du mandat des députés pour une période d’un an à compter du 29 octobre prochain. Et comme raison, l’homme le chef de l’Etat évoque  « *la tenue des élections  de l’année 2018, dans notre pays  des élections présidentielle, législative et municipales sensiblement aux mêmes périodes, rend difficile leur organisation matérielle, à cause du chevauchement des opérations électorales relatives à ces scrutins*». Ce texte gouvernemental vient ainsi mettre un terme aux rumeurs qui ont longtemps circulé sur un éventuel prolongement du mandat des honorables. Mais la récente tenue des élections sénatoriales (sachant que les sénateurs ont la même durée de mandat que les députés) laissait croire qu’elle devait se limiter eu stade des rumeurs. Outre les raisons de trésorerie sus évoquées, on parle de l’organisation de la Can 2019, et les crises qui sévissent dans les parties septentrionales et anglophone du pays comme motifs de cette volonté du chef de l’Etat.

E.E

<https://lavoixducentre.cm/elections-legislatives-et-municipales-vers-une-prorogation-de-mandat>

1. **Coopération – Les retombées de la Visite de Moussa Faki Mahamat**

Par

[**La Voix du Centre**](https://lavoixducentre.cm/author/lavoixducentre)

 -

16 juillet 2018

[0](https://lavoixducentre.cm/cooperation-les-retombees-de-la-visite-de-moussa-faki-mahamat#respond)

100

En visite au Cameroun du 12 au 14 juillet dernier, le président de la Commission de l’Union africaine et son homologue Paul Biya ont évoqué les sujets actuels parmi lesquels la situation sécuritaire des deux régions anglophones et l’élection présidentielle d’octobre prochain.

Son séjour au Cameroun n’a duré que 72 heures mais a été fructueux. Moussa Faki Mahamat, président de la Commission de l’Union africaine a, du 12 au 14 juillet 2018 effectué une visite d’Etat dans la capitale politique du pays. Au programme, échanges avec le Premier ministre, Philémon Yang et le ministre des Relations extérieures, Lejeune Mbella Mbella ; conférence sur le thème « réforme de l’Union africaine et intégration continentale » au siège de l’Institut des relations internationales (IRIC) et le plus important, l’audience accordée par le chef de l’Etat, Paul Biya suivie par un déjeuner d’Etat offert par le couple présidentiel. Au menu de la rencontre entre les deux hommes, la situation sécuritaire au Nord-ouest et au Sud-ouest et l’élection présidentielle à venir. Le président de la République a tenu à présenter à son hôte la situation précaire qui y prévaut et les conséquences qu’elles engendrent pour le pays tout entier. « Au moment où nous vous accueillons, de nombreuses menaces planent sur notre continent. Je citerais principalement les crises socio-politiques et les attaques terroristes qui déstabilisent nos sociétés, sèment des morts et causent des destructions dans nos pays. Elles provoquent non seulement le ralentissement des activités économiques et sociales, mais aussi un afflux des réfugiés et des déplacés ».

Tout comme la plupart des Camerounais, l’homme de nationalité tchadienne a exprimé sa volonté de voir prôner la paix dans ce pays qu’il considère comme sa seconde patrie. « Les éclairages pertinents dont vous avez bien voulu me faire profiter sur les évènements qui se déroulent dans les régions du Nord-ouest et du Sud-ouest du Cameroun me sont particulièrement instructifs. Je voudrais à cette occasion réitérer le ferme attachement de l’Union africaine a l’unité, l’intégrité territoriale, la stabilité politique et sociale de tous nos Etats-membres au sein desquels le Cameroun représente un symbole de diversité linguistique, culturelle et religieuse, mais également d’unité d’harmonie et de concorde (…) Notre attachement à ces valeurs, n’a d’égale que notre profonde conviction qu’aucun diffèrent en Afrique ne saurait être résolu par la violence. Seule la concertation, le dialogue et le traitement pacifique sont la voie juste à poursuivre », a déclaré Moussa Faki Mahamat. Il a par la même occasion promis d’accompagner le pays dans cet élan d’aide humanitaire afin d’aider les populations de cette zone à se reconstruire. « Dès mon retour au siège, je ferai prendre des mesures idoines pour que cette solidarité et compassion se traduisent dans les faits à travers une initiative pertinente qu’appelle la situation ».  S’agissant du scrutin électoral prévu dans trois mois, le Cameroun recevra un accompagnement important de la part de l’UA à travers l’envoi d’une mission d’observation électorale qui veillera au bon fonctionnement de l’élection pendant toute la période.

Marie-France Ibel

<https://lavoixducentre.cm/cooperation-les-retombees-de-la-visite-de-moussa-faki-mahamat>

1. **Unité et paix au Cameroun / Les confessions religieuses prônent ces deux valeurs**

Pa**r Christelle Nkolo**

 -

28 août 2018

[0](https://lavoixducentre.cm/unite-et-paix-au-cameroun-les-confessions-religieuses-pronent-ces-deux-valeurs#respond)

270

Sous l’égide de Mgr Serge Abeng Mbarga, promoteur du combat spirituel pour l’unité et la paix au Cameroun plusieurs prêtres, pasteurs et musulmans se sont réunis le 24 août dernier à Yaoundé autour d’un culte inter-religieux.

L’Eglise catholique apostolique nationale a organisé le 24 août un culte religieux interconfessionnel pour « la paix au Cameroun ». Par ailleurs plusieurs confessions religieuses et chefs traditionnels ont pris part à cette cérémonie où le seul langage était : « bénir les Camerounais en général et le chef de l’Etat en particulier, garant de la paix, de l’unité et de l’intégrité nationale ».  C’est ainsi qu’en prenant la parole, Mgr Serge Abeng Mbarga, membre de la communion des églises catholiques apostoliques nationales du monde, est revenu sur la circonstance de ce rassemblement religieux. *« Mes chers frères et sœurs, nous prions aujourd’hui pour la paix dans notre pays et nous élevons nos voix vers le Dieu tout puissant, vers le seigneur Jésus-Christ qui, prince de la paix et nous saluons avec beaucoup de joie, nos frères d’autres confessions religieuses qui se sont jointes à nous pour cette prière »*. Conséquemment tous les versets bibliques lus ce jour ne renvoyaient qu’à un seul message : celui de la paix. Que ce soit du livre des psaumes en son chapitre 133, qu’à l’évangile de Saint Jean. Pour le révérend Jacob Medang, pasteur de l’Eglise presbytérienne du Cameroun (EPC), *« nous pensons que notre pays a besoin de nos prières, des prières de tous les Camerounais quel que soit les confessions religieuses et l’impératif est là, nous voulons la paix pour notre pays et pour toutes ces régions ».*

Parlant de la crise qui sévit dans les régions anglophones, Mgr a déclaré que *« des menaces contre la paix et la vie dans notre pays se font sentir pour nous fidèles croyants, notre action c’est de nous tourner vers Dieu afin qu’il mette dans notre pays des semences de paix d’amour, de justice et de droit lui qui est le Dieu de paix ».* Pour l’Imam de la Mosquée centrale numéro 1 de Yaoundé, Moussa Malam Ibrahim : *« Le message à retenir est que l’homme est un être humain sacré on ne doit pas se donner la mort ni en tuant, ni en se donnant la mort soi-même. Tout ce que j’ai à dire à mes frères du Nord-ouest et du Sud-ouest est de rester dans la paix d’oublier la haine car le Cameroun est un pays uni et comme le dise les autres, il n’y a pas de Camerounais du Nord, du Sud,  anglophone ou francophone, il n’y a qu’un seul Camerounais. Nous venons de prier pour la paix et je pense que nos prières ont été exaucées et nous demandons au seigneur d’accepter nos morts, ceux qui ont perdu la vie durant cette bataille, ils doivent comprendre que le Cameroun est un et indivisible »*.

N’étant pas la toute première initiative du genre au Cameroun depuis le début de cette crise, la particularité de cette célébration est d’après Mgr Serge Abeng Mbarga : *« qu’aujourd’hui nous nous sommes rassemblés avec nos frères musulmans, les protestants et les orthodoxes donc voilà les cris et les pleurs des Camerounais, des inquiétudes de tous les Camerounais de tout bout et de toutes les idéologies de foi différentes, nous disons en un seul homme, comme un seul Camerounais, halte par nos prières car nous savons que le seigneur nous a écouté ce soir et bientôt la paix au Cameroun ».*

**Christelle Nkolo**

<https://lavoixducentre.cm/unite-et-paix-au-cameroun-les-confessions-religieuses-pronent-ces-deux-valeurs>

1. **Paul Atanga Nji-Le degré zéro de la morale publique ?**

Par

[**Jean Claude Kendeg**](https://lavoixducentre.cm/author/jckendeg)

 -

14 octobre 2018

[0](https://lavoixducentre.cm/paul-atanga-nji-le-degre-zero-de-la-morale-publique#respond)

232

***Avant et surtout pendant le scrutin présidentiel du 07 Octobre dernier, plusieurs faits mettant en exergue la moralité douteuse de ses auteurs, notamment  le scandale des faux observateurs de Transparency International,  sont venus renforcer au sein de l’opinion publique l’idée  que le ministre de l’administration territoriale serait un gangster donc les méthodes de barbouzes trahirait sa reconversion manquée toutes choses qui seraient   contre productives  pour la République.***

Dans  l’article intitulé « *Paul Atanga Nji l’usinier de la contrefaçon ?*  »  qui fit d’ailleurs la  une de l’édition N0 65 de  votre journal, nous  faisions écho  des interrogations de l’opinion public au sujet de la moralité même du ministre de l’administration territorial  eu égard à un certain nombre de grossiers montages a lui imputé (par cette même opinion publique), dans le but de prouver au président Paul Biya qu’il jouit d’un ardent soutien populaire. les acteurs de la mise en scène du Minat avaient pour nom d’artistes : Un sombre cabinet américain dont le sondage donnait Paul Biya vainqueur de la présidentielle avec plus de 80% avant qu’on ne découvre que son patron n’était autre qu’un individu ayant une filiation avec le minant ; un obscure groupuscule d’individu pompeusement baptisé G35, une coquille vide ayant des accointances avec le même Atanga Nji  par le truchement entre autres de sa cellule de communication qui gérait l’intendance. pour finir, des collectifs de conducteurs de moto taxi pèle-mêle  appelant tous (*sans carte d’électeur ni carte d’identité encore moins de permis de conduire ainsi qu’il ressort systématiquement lorsqu’ils sont accidentellement contrôlés*) à voter pour Paul Biya,  le candidat du ministre Paul Atanga Nji.

Les interrogations de l’opinion publique devenaient donc légitimes sur le danger que ce type d’agissement du Minat  pouvait avoir comme conséquences sur l’élection présidentielle en elle-même.En tout état de cause, nous étions a des années lumières d’imaginer, un seul instant, que  l’autre acte de faux dépasserait l’entendement.

***De faux observateurs de Transparecy International***

C’est moins de 48h après le vote que le scandale fera irruption avec la puissance d’un tsunami doublée  à celle d’un séisme sur la scène publique. De faux agents de Transpareny international dûment accrédités par le ministère de l’administration territoriale  pour  jouer le rôle d’observateurs à l’effet de valider le bon déroulement des opérations de vote et donc le résultats sorti des urnes. Ce qu’ils feront tant et si bien que la télévision nationale la Crtv va leur accorder  une grande visibilité pour  que le chef de fils de ces laudateurs et faussaires Raphaël Kalfon, qu’accompagnaient Salomon Benros, Amanda Benzikri, Nurit Greenger  puissent déverser leurs florilèges de débilité en  satisfecit  générale pour Elecam l’organe en charge de l’organisation des élections au Cameroun. le crime n’étant jamais parfait,  ces sorties médiatiques des faux agents de Transparency international  vont attirer l’attention de la vraie Transparency. Dans un communiqué  sans équivoque Patricia Moreira, directrice générale du secrétariat international de Transparency International révèle «**Les individus apparus dans les différents reportages diffusés dans les médias camerounais n’ont aucune affiliation avec Transparency** » .Une enquête sommaire permettra de découvrir le pot aux rose. Ces faux membres de transparency international sont en fait des personnes invitées par la « *Cameroon Agence Presse* » proche du ministre de l’administration territoriale, et  dont le site internet a été créé en septembre 2018 soit un mois avant les élections. Cela confirme que c’est une agence fictive créée pour un but précis. .Comment comprendre que le Minat qui a réduit a peau de chagrin ( de 1200 à 40 ) les accréditations d’observateurs aux Ong qui existe depuis plus d’une décennies  et ayant régulièrement couvert les élections comme un monde à venir de Philippe Nanga,  pour accréditer des gens dont la naissance  se situait après la convocation du corps électorale ?

 Suite à ce scandale  qui n’honore pas notre pays, le candidat du Mrc (Mouvement pour la Renaissance du Cameroun), Maurice Kamto envisage de porter plainte au Minadt (Ministère de l’Administration territoriale) et à la chaîne nationale Crtv (Cameroon Radio & Television). Si le scandale des faux observateurs à lui tout seul suffit pour entacher la crédibilité du scrutin  du 07 Octobre 2018, un autre fait imputable  au ministre de l’administration territoriale vient ajouter au discrédit à ces élections. La situation de  quasi inexistante du vote dans les deux régions anglophones en proie à une crise séparatiste.

***Taux de participation historiquement faible dans le nord-ouest et le sud-ouest***

sous la base des engagements du ministre de l’administration territoriale de garantir la sécurité des électeurs dans ces deux régions, Elecam avait maintenu les bureaux de vote  dans cette partie du territoire invitant les électeur à rejoindre les centres regroupés de voté .Pourtant les partis de l’opposition  à l’instar du Sdf de Joshua Osih avaient demandé de faire voter les déplacés inscrit sur les listes électorale à quel qu’endroit où ils se trouverait dans le pays du fait de l’unicité de la circonscription électorale lors de l’élection présidentielle. Berné par les assurances du Minat, Elecam va opposer une fin de non-recevoir à ce schéma  pourtant réaliste qui a permis au président du sénat Marcel Nyat Njifendji de voter en France alors qu’il est inscrit au Cameroun, idem pour les soldats en opération, les fonctionnaires en mission…

A l’arrivé, force est de constater que le Minat n’a pas tenu parole. Le vote dans le nord-ouest et le sud-ouest ont été une simple vu de l’esprit. Selon Hans de Marie Heungoup, chercheur à l’International Crisis Group (ICG), « *quasiment tous les retours nous parvenant situent le taux de participation en deçà de 5% » dans les régions anglophones du Sud-Ouest et du Nord-Ouest où plus de 300.000 personnes ont dû fuir leur domicile »*. Il n’en fallait pas plus pour que le Sdf, univers  introduisent des recours en annulation totale  de ce scrutin mais aussi le  que le Mrc demande   l’annulation  partielle des votes au principal  motif  d’insécurité dans les régions anglophones.

***Atanga Nji laisse filer les faux observateurs de Transparency  mais menace les libertés fondamentales des honnêtes citoyens camerounais***

Mais au lieu de répondre à l’opinion publique sur ces manquements graves qui portent atteinte à la sincérité du vote, au lieu de s’expliquer sur la sortie de=u territoires des faussaires s’etant fait passer pour des observateurs  électoraux de Transparency International, le ministre Paul Atanga Nji verse dans la menace tous azimuts contre le Mrc notamment qui semble hanter ses nuits et ses journées. Comme  pris d’hystérie, il distribue a tout vent, des invectives, des menaces à peines voilées et remet en cause la liberté d’expression « *qui est de loin la seule note positive que même l’opposition met à l’actif des 36 ans du président Paul Biya au pouvoir »*.

La question que cette opinion publique se pose est de savoir  jusqu’où ira le Minat Paul Atang Nji dans cette escalade de faits immoraux avant d’être arrêté dans sa course folle par celui qui l’a nommé à ce poste  il n’y a même pas encore 1 an?

***Cathérine Ngaguene***

<https://lavoixducentre.cm/paul-atanga-nji-le-degre-zero-de-la-morale-publique>

1. **Présidentielle 2018-Paul Biya président Légal ou Légitime ?**

Par

[**Jean Claude Kendeg**](https://lavoixducentre.cm/author/jckendeg)

 -

21 octobre 2018

***Malgré d’interminables  heures voire des jours de débat devant les sages du conseil constitutionnel, le rejet systématique des requêtes en annulation partielle ou  totale de la présidentielle du 07 Octobre dernier introduite par les candidats des partis d’opposition ne laisse plus le moindre doute sur la victoire du président sortant Paul Biya si cette victoire s’est enveloppée du manteau de la légalité sa  légitimité peut être sérieusement questionnée.***

Election présidentielle du 07 octobre 2018, Biya Paul  vainqueur ! C’est la principale décision du conseil constitutionnelle du Cameroun ce Lundi 22 Octobre. l’ auguste juridiction  confirmera ainsi  les chiffres de la commission nationale de recensement général des votes qui donne  Paul Biya, le candidat du Rassemblement Démocratique du Peuple Camerounais (rdpc) vainqueur avec 71,28 % des  voix exprimées sur l’ensemble du territoire camerounais et dans la diaspora, contre 14,23 % pour [Maurice Kamto,](https://www.jeuneafrique.com/642027/politique/presidentielle-au-cameroun-en-proclamant-sa-victoire-kamto-amorce-le-bras-de-fer-avec-biya/) candidat du Mouvement pour la renaissance du Cameroun (MRC), et 6,28 % pour Cabral Libii, challenger de l’Union nationale pour l’intégration vers la solidarité (Univers). Joshua Osih candidat du social Democratic Front ( Sdf) , principale parti de l’opposition arrive selon ce résultat en 4e .position.

Paul Biya rempile donc pour son 7e mandat sans discontinuer à la tête du Cameroun. Arrivé au pouvoir en 1982 à la faveur de la démission de son prédécesseur, Ahmadou Ahidjo, le second président du Cameroun a été élu en 1984 et 1988 sous le parti unique puis après l’instauration du multipartisme en 1992, 1997 et 2004. En 2008, l’Assemblée largement dominée par le parti au pouvoir supprime la limitation du nombre de mandats présidentiels lui ouvrant la voie à un nouveau septennat en 2011. Ce qu’il vient de renouveler le 07 Octobre 2018. Cependant la victoire de Paul Biya a cette élection présidentielle de 2018 aura donné droit à des recours défendus avec ténacité par les requérant devant le conseil constitutionnel.

**Légalité ostentatoirement affichée**

En effet, plusieurs candidats en course dans ce scrutin ont saisi le conseil constitutionnel par des requêtes en annulation totale ou partielle de cette élection. D’après eux, des irrégularités massives ont entaché le déroulement des opérations de vote et de dépouillement des voix valablement exprimées dans les urnes .Ou encore,  des pan entiers de la population n’ont pas pu s’exprimer sur le choix de celui qui va présider aux destinés du pays pour les 07 prochaines années.  Le recours le plus solide en argument et en moyens de défense fut celui introduit par le professeur  [Maurice Kamto, candidat du Mouvement pour la renaissance du Cameroun (MRC)](https://www.jeuneafrique.com/642027/politique/presidentielle-au-cameroun-en-proclamant-sa-victoire-kamto-amorce-le-bras-de-fer-avec-biya/). Il réclamait  l’annulation partielle du vote dans  sept  des dix régions du pays où le candidat estime avoir *noté « d’énormes irrégularités de nature à entacher la crédibilité du scrutin »*.Durant près de deux jours l’avocat internationalement reconnu et son conseil constitué d’une batterie d’avocat à la solide réputation nationale et internationale établies  à l’instar des ex bâtonniers Me Yondio Black Madengue et Me Akeré Muna , entourés des figures du barreau sur la scène national à l’instar de Me Emmanuel Simh, par ailleurs vice-président du MRC vont appuyer leurs présentations  des moyens de droits émanant du code électoral et éléments documentaires provenant des opérations électorales . Mais au finale la demande d’annulation partielle n’aura pas du succès auprès du conseil constitutionnel .Son verdict est sans appel  « Le Conseil constitutionnel à l’unanimité des membres décide qu’en la forme, le recours de sieur Kamto est recevable (…). Au fond, il rejette cette requête car non justifiée », a déclaré Clément Atangana, le président du Conseil.

Le [recours en annulation totale de l’élection déposé par Joshua Osih](https://www.jeuneafrique.com/644495/politique/cameroun-trois-candidats-demandent-lannulation-du-scrutin-presidentiel/) [candidat du Social Democratic Front (SDF)](https://www.jeuneafrique.com/635899/politique/presidentielle-au-cameroun-joshua-osih-il-faut-en-finir-avec-lhypercentralisation-de-letat/), malgré que ses  avocats se soient succédés à la barre pour défendre la position de leur client sur six points, visant à démontrer que le scrutin a été émaillé d’une « *kyrielle d’irrégularités  mettant  à mal l’unité nationale…Apartheid contre les régions du nord-ouest et du sud-ouest*(…) *que l ’insécurité, les violences, les couvre-feux et l’état de guerre permanent que vivent ces populations au quotidien a émoussé la volonté des plus courageux à aller voter. C’est une violation flagrante de l’article 21 de la déclaration universelle des droits de l’homme* », a expliqué Me Mustapha Ngouana, l’un des avocats de Joshua Osih, avant d’énumérer une dizaine de bureaux de vote du département de la Mezam (Nord-Ouest), où le nombre de votants était de zéro. Mais ce recours du candidat du Sdf connaitre un sort identique à celui du Mrc. A l’unanimité le conseil constitutionnelle va le rejeté car non fondé du fait selon lui  que le taux de participation bas dans ces deux régions «  *ne  compromettraient  la sincérité du résultat de ladite élection. »*

Le recours de Cabral Libii candidat du parti univers avait aussitôt introduit avait été aussitôt rejeté pour irrecevabilité sur la forme car déposé 73h au lieu de 72H comme le veut le code électorale.

Mais seulement, à travers l’audience publique retransmise  en direct à  la télévision nationale et repris par l’ensemble des chaines de radio et  télévision  les plus importantes du pays, l’opinion publique, à la faveur des moyens de droit évoqués par l’opposition et les contradictions sur la signature d’un certains nombre de document électoraux provenant de Elecam aura de sérieux doute sur la transparence de ce scrutin et la sincérité des résultats.

**Vers un déficit de légitimité  du vainqueur légal ?**

Avant toute chose la question de la participation de toutes les populations du pays a ce scrutin aura été de toutes les discussions.

**Non-participation au scrutin des populations des deux régions anglophones !**

La question de la légitimité du vainqueur de cette élection se pose avec acquitté. En effet,  plusieurs faits palpables militent dans ce sens. Selon Hans de Marie Heungoup, chercheur à l’International Crisis Group (ICG), cité par africanews “quasiment tous les retours nous parvenant situent le taux de participation en deça de 5 %” dans ces régions anglophones du Sud-Ouest et du Nord-Ouest où plus de 300.000 personnes ont dû fuir leur domicile. Selon plusieurs observateurs sur le terrain ce sont des fonctionnaires et des forces de l’ordre et de l’armée déployée en masse dans ces deux régions qui ont voté. Interpellé, Elecam, l’organe en charge des élections, n’a pas hésité à se défendre. « *Elecam n’est pas responsable de la crise qui secoue ces zones*», a rétorqué Abdoulkarimou, le directeur général adjoint de l’organe.  Le conseil constitutionnel à même avoué qu’il n’y avait pas un seuil en deçà duquel on devait déclarer une élection invalide. Un vide juridique qui ajoute à l’illégitimité du vainqueur de l’élection présidentielle 2018 en confirmant  la quasi absence de vote dans les deux régions anglophones en crise.

**La récusation de certains membres du Conseil**

Elle a été soulevée par le candidat Maurice kamto du MRC. La défense de Kamto avait relevé les statuts du président Clémént Atangana, des membres Jean Foumane Akam et Emmanuel Bonde, entre autres, comme violant les dispositions de la loi de 2004 les instituant. S’agissant du premier Me Souop avait évoqué son statut d’époux d’un député du Rdpc et d’avocat inscrit au Barreau du Cameroun. S’agissant du deuxième, il avait rappelé son statut de PCA d’entreprise publiques et signataires de motions de soutiens au candidat Biya. Quant au 3è, la défense du Pr Kamto avait indiqué que jusqu’à ce jour il reste membre du Comité central du Rdpc. Tout ce qui est contraire aux dispositions de la loi qui prohibe aux membres du Conseil d’exercer toute activité ou mandat de nature à porter atteinte à leur indépendance voire leur dignité.

A ce propos, ils ont rejeté la demande de M. Kamto. Motif du rejet: évoquant la loi de 2004 instituant le Conseil Constitutionnel, Clément Atangana et ses pairs estiment qu’un justiciable, fut-il candidat comme l’est M. Kamto n’a pas qualité pour demander la récusation des membres. Cette qualité serait reconnue uniquement à l’autorité en charge de la nomination des membres dudit Conseil. quel intérêt Paul Biya candidat à la présidentielle aurait-il de récuser les membres qu’il a lui-même nommé en fonction précisément des liens qu’il a avec eux pose un observateur ?.S’il n’y avait que cela.

**Des procès-verbaux douteux et chiffres non concordant**

Des réels doutes sont apparus au sujet de la présentation des procès-verbaux des commissions départementales et bureau de votes dans plusieurs régions incriminées par le Mrc. L’exemple est celui des anomalies pour la plupart liées à de mauvais remplissages de PV, comme dans le bureau de vote de Biwong-Bulu où sur 171 votants, Paul Biya a obtenu 171 voix, et Cabral Libii une. « Nous avons noté ces erreurs dans des dizaines de bureaux de vote répartis principalement dans les départements de la Mvila, la Haute-Sanaga, le Nyong-et-Kéllé, ainsi que dans les régions du Nord-Ouest et du Sud-Ouest, explique à *Jeune Afrique* le professeur Alain Fogue, mandataire du MRC au sein de la Commission de recensement des votes.

la production par Émile Essombe, Magistrat du conseil constitutionnel et par ailleurs président de la Commission nationale de trois procès-verbaux non   signés sur chaque page va finir de jeter un sérieux doute sur la sincérité des résultats de ce scrutin. Comme  les avocats de M. Kamto le peuple va faire sienne l’idée qu’  « *On ne peut présenter devant aucun tribunal une feuille de présence signée et des chiffres non signés, et l’accepter, car on pourrait signer la feuille de présence pendant que les chiffres sont bidouillés derrière*

L’opinion publique qui a souhaité en vain que le conseil constitutionnel fasse produire les 32 procès-verbaux  réclamé par l’opposition pour effacer tous doute sur la crédibilité des résultats. Pour le peuple,  ce manque de fermeté du conseil constitutionnel aura donc fortement grevé la légitimité de l’élection du président Biya en 2018.

<https://lavoixducentre.cm/presidentielle-2018-paul-biya-president-legal-ou-legitime>

1. **Assemblée Générale de l’Ordre des Avocats au Barreau du Cameroun-Le défi de l’organisation des élections transparentes**

Par

[**La Voix du Centre**](https://lavoixducentre.cm/author/lavoixducentre)

 -

13 novembre 2018

***C’est à cette fin que s’active le comité d’organisation à pied d’œuvre depuis plusieurs mois à Douala.***

Le 24 Novembre 2018 se tiendra à Douala, l’Assemblée Générale de l’Ordre des Avocats au Barreau du Cameroun. A quelques jours de cette date, son comité d’organisation  multiplie des réunions préparatoires dans la perspective de la réussite desdits travaux dont l’organisation transparente et crédible  des différentes élections prévues dans  l’ordre du jour  constituera à n’en point douter l’étalon de mesure. « *Si nous les avocats nous ne pouvons pas organiser  les élections transparentes quelle autre corporation pourra le faire ?* » s’interroge comme un défi personnel et collectif Me Nico Hallé, le président sortant de l’Assemblée Générale.

Autour de  cette figure du barreau, les autres membres de l’assemblée générale s’activent  pour qu’aucuns détails ne soient laissés au hasard. « *Nous  avons déjà vu les aspects liés à l’hébergement de nos confrères qui viendront d’autres villes ainsi que la restauration et la mise à disposition de la salle  du Castel Hall à Bali… »*Confie Me Fomoukong isabelle  qui fait savoir qu’il s’agit de montrer un exemple en termes d’organisation. Et pour cause, c’est à un véritable marathon électoral que vont se livrer les avocats du Cameroun le 24 Novembre prochain au Castel Hall de Douala.

**Une Assemblée générale pour 4 élections dont celui du bâtonnier de l’ordre**

Au cours de cette seule assemblée générale, pas moins de 4 scrutins seront au programme : l’élection du président de l’assemblée générale, l’élection du vice-président de l’assemblée générale, l’élection des quinze membres du conseil de l’ordre et l’élection du bâtonnier de l’Ordre des Avocats au Barreau du Cameroun.

Le président sortant de l’assemblée générale Me Nico Hallé se veut serein, «  *si quelqu’un essaie de frauder il sera sanctionner* » prévient’ il. Dans ce chapitre de la transparence, l’on se félicite déjà de la présence ce 24 Novembre des urnes transparentes  et d’un bulletin unique comportant les visages des 45 candidats en lice  pour les 15 postes de membres du conseil. « *Les électeurs n’auront qu’à cocher 15 noms sur cette liste. S’ils cochent plus ou moins leur vote sera invalidé* » révèle Me Evineba Céline qui ajoute que  «  *la transparence sera-t-elle que les vainqueurs seront contents de leurs victoires et les perdants convaincus de leurs défaites* ». Une position corroborée par Me Mamba Berthe qui met en avant la qualité de l’enveloppe qui ne peut recevoir plus d’un bulletin et, surtout, la mise sur pied d’un comité chargé de veiller à la régularité des procurations. «  *Si un confrère  présente  une procuration  nous allons au préalable contrôler sa  régularité et ce n’est que lorsque celle-ci sera vérifiée qu’il sera autorisé à voter* » conclut-elle.

Initialement prévue il y a plus d’un an à Buea et reportée pour cause d’insécurité du fait de la crise en zone anglophone, l’assemblée générale de de l’Ordre des Avocats au Barreau du Cameroun de ce 24 novembre à Douala, verra la participation de pas moins de 35 000 avocats. Un vrai challenge en termes d’organisation et de transparence  confie Me Nico Hallé.

***R.T.***

<https://lavoixducentre.cm/assemblee-generale-de-lordre-des-avocats-au-barreau-du-cameroun-le-defi-de-lorganisation-des-elections-transparentes>

1. **Grands chantiers et grandes opportunités-Le nouveau septennat de Paul Biya au pas de charge**

Par

[**kristel**](https://lavoixducentre.cm/author/kristel)

 -

20 novembre 2018

**Consolider les acquis et maintenir le cap sur l’avenir au plan économique notamment : est la vision du chef d’Etat camerounais,  pour ce mandat débutant, qui appelle une véritable dynamique au sein du gouvernement.**

Pour ne pas contrarier le programme politique, économique et social, tracé par le président de la République, Paul Biya, dans son discours d’investiture, le 06 novembre dernier, tout l’appareil de l’Etat devrait se mettre en branle dès maintenant. C’est certainement pour prêcher par l’exemple que le chef d’Etat qui a débuté un nouveau septennat il y a quelques jours, vient d’ordonner par le truchement du ministère de l’Enseignement supérieur, le recrutement de 2000 titulaires de doctorat/PHD sur trois ans, dont 1000 en 2019, et 500 en 2020 et aussi en 2021. Le ton est donné, maintenant les défis multiples auxquels fait face le pays aux plans politique, économique et social, devraient certainement amener les membres du gouvernement à se mettre résolument au travail. D’où l’exhortation des populations au chef de l’Etat de mettre en place, dans les meilleurs délais, une nouvelle combinaison gouvernementale. Celle qui sera composée d’hommes capables de consolider les acquis et de maintenir le cap sur l’avenir, comme il l’a si bien souligné le 06 novembre 2018.

Par acquis, l’on entend entre autres : la mise en œuvre des réformes structurelles et la prise des mesures pour redresser la situation budgétaire ; le retour progressif à la croissance économique ; la soutenabilité de la dette extérieure, l’impulsion donnée aux grands projets d’infrastructures concernant la production d’énergie, la distribution d’eau potable et la construction des routes. De même que de nombreux chantiers qui ont été ouverts dans les domaines de la santé, de l’éducation et des services sociaux. Par contre, pour le septennat déjà en cours, des efforts sont davantage attendus dans plusieurs domaines vitaux pour l’économie du pays.  « *D’une façon générale, au cours du septennat qui s’annonce, nous veillerons à consolider nos acquis, tout en explorant les pistes nouvelles, nous permettant de saisir toutes les opportunités d’un monde en constante évolution* », dixit Paul Biya.

**Pied de guerre**

Le pays devrait se mettre sur le pied de guerre économiquement parlant, pour défier les règles iniques qui régissaient la mondialisation des échanges, les tendances au protectionnisme et mêmes les effets nocifs des changements climatiques, pour véritablement se projeter dans l’avenir.  « *Nous allons réaliser une véritable « révolution agricole » en modernisant nos moyens de production et en transformant davantage nos produits agricoles. Cela devrait aller de pair avec la mise à disposition de nouveaux équipements, magasins de stockage et routes d’accès. Ainsi pourrait se conforter notre statut de grenier de l’Afrique Centrale. Une économie moderne ne saurait se concevoir sans l’existence d’un secteur industriel performant. Nous disposons d’un Plan directeur d’industrialisation qui définit les contours et le contenu d’un projet d’envergure dans ce domaine. Sa réalisation sera une des tâches prioritaires du septennat*», promet alors le chef de l’Etat. Et d’ajouter dans la même veine  que « *L’industrie, comme l’agriculture, exigent un apport d’énergie stable et suffisant. Nous avons entrepris des efforts importants dans ce secteur depuis un certain temps déjà. Les barrages et les centrales hydroélectriques que nous avons construits devraient nous permettre, à plus ou moins brève échéance, de répondre pleinement aux exigences de notre économie et aux préoccupations de nos populations en la matière.* »

Les chantiers du septennat qui vont jusqu’en 2025, ne s’arrêtent pas à ce niveau. Il est prévu notamment l’exploitation des sites et cours d’eau disponibles. Les zones rurales devraient être dotées de centrales solaires. Les infrastructures de transport (routes, ports, aéroports) quant à elles, ne seront pas à la remorque. Tout cela dans l’optique de relancer la croissance économique, créatrice d’emplois, notamment pour les jeunes, et susceptible d’améliorer le pouvoir d’achat etc. Tout cela ne sera possible que grâce au retour à la stabilité dans les régions aujourd’hui confrontées aux crises diverses, le terrorisme dans l’Extrême-Nord, l’action des bandits de grands chemins à l’Est et les exactions des sécessionnistes dans le zone anglophone : le Nord-ouest et le Sud-ouest.

**Jean-Marie Biongolo**

<https://lavoixducentre.cm/grands-chantiers-et-grandes-opportunites-le-nouveau-septennat-de-paul-biya-au-pas-de-charge>

1. **Paul Atanga Nji, le degré zéro de la morale publique**

Par

[**La Voix du Centre**](https://lavoixducentre.cm/author/lavoixducentre)

 -

4 mars 2019

Né en 1960 à Bamenda, Paul Atanga Nji aurait pu embrasser une carrière de banquier ou, comme la majorité de ses frères et sœurs résidant aux États-Unis, de médecin ou de pharmacien. Il est nommé ministre de l’administration des Territoriale dans le 4è gouvernement Yang, dans un contexte de crise dans la zone anglophone.

Et depuis l’homme n’a cessé de multiplier des stratagèmes pour s’attirer la sympathie de son président. Avant et surtout pendant le scrutin présidentiel du 07 Octobre 2018 dernier, plusieurs faits mettant en exergue la moralité douteuse de l’homme, notamment  le scandale des faux observateurs de Transparency International,  sont venus renforcer au sein de l’opinion publique l’idée  que le ministre de l’Administration Territoriale serait un gangster donc les méthodes de barbouzes  trahiraient sa reconversion manquée toutes choses qui seraient contre-productives  pour la République. Et comme si cela ne suffisait l’assassinat d’un soldat de la Garde présidentielle le mois dernier et dont la vidéo de son assassinat a révolté tout le pays lui est attribuée. Pour jeter l’opprobre sur  les sécessionnistes les milices du ministre auraient perpétré cet acte pour que désormais les groupes séparatistes soient considérés comme des terroristes qui n’ont pour seul leitmotiv de créer la psychose au sein des populations

Dans  l’article intitulé **«*Paul Atanga Nji l’usinier de la contrefaçon ?*»**  qui fit d’ailleurs la  une de l’édition N0 65 de votre journal, nous  faisions écho  des interrogations de l’opinion public au sujet de la moralité même du ministre de l’Administration Territorial  eu égard à un certain nombre de grossiers montages à lui imputé (par cette même opinion publique), dans le but de prouver au président Paul Biya qu’il jouit d’un ardent soutien populaire. Les acteurs de la mise en scène du Minat avaient pour nom d’artistes : Un sombre cabinet américain dont le sondage donnait Paul Biya vainqueur de la présidentielle avec plus de 80% avant qu’on ne découvre que son patron n’était autre qu’un individu ayant une filiation avec le Minat ; un obscure groupuscule d’individu pompeusement baptisé G35, une coquille vide ayant des accointances avec le même Atanga Nji par le truchement entre autres de sa cellule de communication qui gérait l’intendance. Pour finir, des collectifs de conducteurs de moto taxi pèle-mêle appelant tous (*sans carte d’électeur ni carte d’identité encore moins de permis de conduire ainsi qu’il ressort systématiquement lorsqu’ils sont accidentellement contrôlés*) à voter pour Paul Biya,  le candidat du ministre Paul Atanga Nji.

Les interrogations de l’opinion publique devenaient donc légitimes sur le danger que ce type d’agissement du Minat pouvait avoir comme conséquences sur l’élection présidentielle en elle-même. En tout état de cause, nous étions à des années lumières d’imaginer, un seul instant, que  l’autre acte de faux dépasserait l’entendement.

**De faux observateurs de Transparecy International**

C’est moins de 48h après le vote que le scandale fera irruption avec la puissance d’un tsunami doublée  à celle d’un séisme sur la scène publique. De faux agents de transpareny international dûment accrédités par le ministère de l’administration territoriale  pour  jouer le rôle d’observateurs à l’effet de valider le bon déroulement des opérations de vote et donc le résultats sorti des urnes. Ce qu’ils feront tant et si bien que la télévision nationale la Crtv va leur accorder  une grande visibilité pour  que le chef de fils de ces laudateurs et faussaires Raphaël Kalfon, qu’accompagnaient Salomon Benros, Amanda Benzikri, Nurit Greenger  puissent déverser leurs florilèges de débilité en  satisfecit  générale pour Elecam l’organe en charge de l’organisation des élections au Cameroun. Un crime n’étant jamais parfait,  ces sorties médiatiques des faux agents de Transparency international  vont attirer l’attention du vrai Transparency. Dans un communiqué  sans équivoque Patricia Moreira, directrice générale du secrétariat international de Transparency International révèle «***Les individus apparus dans les différents reportages diffusés dans les médias camerounais n’ont aucune affiliation avec Transparency***» .Une enquête sommaire permettra de découvrir le pot aux rose. Ces faux membres de transparency international sont en fait des personnes invitées par la «*Cameroon Agence Presse* » proche du ministre de l’administration territoriale, et  dont le site internet a été créé en septembre 2018 soit un mois avant les élections. Cela confirme que c’est une agence fictive créée pour un but précis. Comment comprendre que le Minat qui a réduit de façon drastique (de 1200 à 40) les accréditations d’observateurs des Ong qui existent depuis plus d’une décennie  et ayant régulièrement couvert les élections comme un Monde à Venir de Philipe Nanga,  pour accréditer des gens dont la naissance se situait après la convocation du corps électoral ?

Suite à ce scandale  qui n’honore pas notre pays, le candidat du Mrc (Mouvement pour la Renaissance du Cameroun), Maurice Kamto envisage de porter plainte au Minadt (Ministère de l’Administration territoriale) et à la chaîne nationale Crtv (Cameroon Radio & Television). Si le scandale des faux observateurs à lui tout seul a suffi pour entacher la crédibilité du scrutin du 07 Octobre 2018, un autre fait imputable  au ministre de l’Administration Territoriale vient ajouter au discrédit à ces élections. La situation de  quasi inexistante du vote dans les deux régions anglophones en proie à une crise séparatiste.

***Taux de participation historiquement faible dans le nord-ouest et le sud-ouest***

sous la base des engagements du ministre de l’administration territoriale de garantir la sécurité des électeurs dans ces deux régions, Elecam avait maintenu les bureaux de vote  dans cette partie du territoire invitant les électeur à rejoindre les centres regroupés de voté .Pourtant les partis de l’opposition  à l’instar du Sdf de Joshua Osih avaient demandé de faire voter les déplacés inscrit sur les listes électorale à quel qu’endroit où ils se trouverait dans le pays du fait de l’unicité de la circonscription électorale lors de l’élection présidentielle. Berné par les assurances du Minat, Elecam va opposer une fin de non-recevoir à ce schéma  pourtant réaliste qui a permis au président du sénat Marcel Nyat Njifendji de voter en France alors qu’il est inscrit au Cameroun, idem pour les soldats en opération, les fonctionnaires en mission…

A l’arrivé, force est de constater que le Minat n’a pas tenu parole. Le vote dans le nord-ouest et le sud-ouest ont été une simple vu de l’esprit. Selon Hans de Marie Heungoup, chercheur à l’International Crisis Group (ICG), « *quasiment tous les retours qui nous parvenaient, situaient le taux de participation en deçà de 5% » dans les régions anglophones du Sud-Ouest et du Nord-Ouest où plus de 300.000 personnes ont dû fuir leur domicile »*. Il n’en fallait pas plus pour que le Sdf, univers  introduisent des recours en annulation totale  de ce scrutin mais aussi le  que le Mrc demande   l’annulation  partielle des votes au principal  motif  d’insécurité dans les régions anglophones.

***Atanga Nji laisse filer les faux observateurs de Transparency mais menace les libertés fondamentales des honnêtes citoyens camerounais***

Mais au lieu de répondre à l’opinion publique sur ces manquements graves qui portent atteinte à la sincérité du vote, au lieu de s’expliquer sur la sortie du territoire des faussaires qui s’étaient fait passer pour des observateurs  électoraux de Transparency International, le ministre Paul Atanga Nji verse dans la menace tous azimuts contre le Mrc notamment qui semble hanter ses nuits et ses journées. Comme  pris d’hystérie, il distribue a tout vent, des invectives, des menaces à peines voilées et remet en cause la liberté d’expression « *qui est de loin la seule note positive que même l’opposition met à l’actif des 36 ans du président Paul Biya au pouvoir »*.

La question que cette opinion publique se pose est de savoir jusqu’où ira le Minat Paul Atang Nji dans cette escalade de faits immoraux avant d’être arrêté dans sa course folle par celui qui l’a nommé à ce poste  il n’y a même pas encore 1 an?

«Briseur de grève», selon ses détracteurs, Paul Atanga Nji a choisi son camp. Farouche partisan de Paul Biya, il est celui qui s’opposera à John Fru Ndi sur ses terres, sans toutefois jamais se présenter à une élection locale. Il pourrait en être récompensé, d’autant qu’il s’entend bien avec le second maître d’Etoudi, le directeur du cabinet civil, Samuel Mvondo Ayolo.

***Catherine Ngaguene***

<https://lavoixducentre.cm/paul-atanga-nji-le-degre-zero-de-la-morale-publique-2>

1. **Zones économiquement sinistrées – le Nord-ouest, le Sud-ouest et le Grand-nord visés par le décret de Dion Ngute**

Par

[**mercedes**](https://lavoixducentre.cm/author/mercedes)

 -

3 septembre 2019

*Face au bilan extrêmement alourdi en pertes matériels et humains dans le Nord-ouest, le Sud-ouest et les exactions perpétrées par Boko Haram, Dion Ngute précise les modalités de mise en œuvre du statut de ces zones et les autres conditions qui s’en suivent.*

Il faut dire que cela n’a pas été de gaité de cœur pour le chef du gouvernement Camerounais de signer ce décret quelques temps après qu’il soit rentré de la zone dite anglophone de cette localité.
En rappel, une visite de 04 jours aux fins de ramener la paix dans cette zone avait été effectuée par Dion Ngute. Il avait alors été accueilli par les chefs traditionnels sur le pont du mungo en tant que dignitaire de la localité. Accompagné du patriarche et doyen d’âge du Senat Chief Mukete, une offre de dialogue pour la résolution de cette crise qui secoue les 02 regions anglophones avait été entamée et bien sûr, les lueurs d’espoir pour cette sortie de crise qui sévit depuis 03 ans déjà se sont faits ressortir.
**Qu’est ce qui n’a pas marché?**
A ce jour, rien n’y est fait et pour sauver la mise , le Premier ministre a signé le 02 septembre un décret qui tente de tendre la perche aux investisseurs de la localité. Ce nouveau décret du chef du gouvernement Camerounais, encourage les entreprises à s’installer dans ces régions troublées par des conflits.
« Par zone économiquement sinistrée, il faut entendre un espace territorial préalablement circonscrit dans lequel l’activité économique est structurellement et durablement affectée par l’insécurité ou les catastrophes de toute nature à l’instar de l’inondation, la famine, la sècheresse » peut-on lire dans l’alinéa (2) de ce décret.
Décret il faut le dire, qui exonère des impôts et taxes aux entreprises exerçants dans la localité et les entreprises qui réalisent des investissements visant la reconstitution de leur outil de production dans lesdites zones économiquement sinistrées, bénéficient d’un crédit d’ impôt de près de 30% des dépenses engagées.
Il faut relever que, ledit statut peut être retiré lorsque les effets du sinistre l’ayant justifié, ont cessé.

**Lionnel Bayong Fils**

<https://lavoixducentre.cm/zones-economiquement-sinistrees-le-nord-ouest-le-sud-ouest-et-le-grand-nord-vises-par-le-decret-de-dion-ngute>

1. **Discours du chef de l’Etat -L’urgence de l’effectivité du vivre-ensemble**

Par

[**mercedes**](https://lavoixducentre.cm/author/mercedes)

 -

12 septembre 2019

Depuis quelques années, le Cameroun est un véritable laboratoire d’observation et de recherche transdisciplinaire en matière de « vivre ensemble ». Ce concept mal exploité par les pouvoirs publics a plongé le pays dans une série de revendications sécessionnistes avec pour conséquence une crise sécuritaire dans les régions du Nord-ouest et du Sud-ouest. La publication de ce communiqué rendu public a plongé les Camerounais dans l’expectative quant au contenu du message du chef de l’Etat à la nation, tant il n’est pas de coutume pour lui de le faire en dehors des périodes classiques que connaissent les Camerounais. Le contexte sociopolitique que traverse le pays suivi de la tournée du Premier ministre dans les régions anglophones laisse présager un tel scenario.  Au-delà des supputations qui font les gorges chaudes, les Camerounais se sont déjà fait une idée de la mouture que pourrait servir le chef de l’Etat. Plusieurs sujets étaient attendus ce 10 Septembre 2019 si on s’en tient aux souffrances que vivent les Camerounais au quotidien.

Déjà dans son discours à l’occasion de sa prestation de serment, le président avait exhorté les séparatistes des zones anglophones à mettre fin aux hostilités. Il avait reconnu pour la première fois les frustrations des populations des deux régions anglophones du Nord-ouest et du Sud-ouest frappées depuis par un conflit armé. Par ailleurs il avait parlé pour la première fois des sécessionnistes et non plus uniquement des terroristes pour désigner les séparatistes armés, dénonçant le joug extrémiste qui fait régner la peur et la désolation de ces entrepreneurs de guerre, les appelant à déposer les armes et à retrouver le droit chemin. Cet appel devrait en principe refaire surface au vu de la dégradation de la situation qui au lieu de s’améliorer, s’empire au jour le jour selon de nombreux rapports.

Il sera question pour l’homme du 06 novembre de revisiter le parcours du vivre-ensemble, un concept qui de plus en plus semble être un concept plutôt qu’une réalité. En effet les discours haineux, la cohabitation ethnique difficile, les discriminations professionnelles le manque de tolérance, le partage inéquitable des ressources naturelles et les détournements de deniers publics par une certaine élite fragilise de plus en plus ce concept. Il faudra alors cette fois passer de l’étape de beaux discours à la concrétisation de ce concept, pour ne plus avoir à faire aux mêmes sons de cloche qui ont souvent été servis aux Camerounais pendant des décennies. Le chef de l’Etat devra user d’une pugnacité et d’une dextérité pour inverser la courbe qui laisse croire que le vivre-ensemble se résume à un accaparement d’une clique des richesses du pays, de l’appropriation de grandes écoles au bénéfice d’une élite. Il faudra aussi que « l’homme lion » démontre qu’on ne peut parler du vivre ensemble sans l’impunité qui sont devenues des règles dans la société, véritable insulte à l’intelligence des Camerounais. C’est une condition pour le développement et le retour à la paix.

**Oscar Onolo**

<https://lavoixducentre.cm/discours-du-chef-de-letat-lurgence-de-leffectivite-du-vivre-ensemble>

1. **Paul Atanga Nji, le degré zéro de la morale publique**

Par

[**La Voix du Centre**](https://lavoixducentre.cm/author/lavoixducentre)

 -

4 mars 2019

Né en 1960 à Bamenda, Paul Atanga Nji aurait pu embrasser une carrière de banquier ou, comme la majorité de ses frères et sœurs résidant aux États-Unis, de médecin ou de pharmacien. Il est nommé ministre de l’administration des Territoriale dans le 4è gouvernement Yang, dans un contexte de crise dans la zone anglophone.

Et depuis l’homme n’a cessé de multiplier des stratagèmes pour s’attirer la sympathie de son président. Avant et surtout pendant le scrutin présidentiel du 07 Octobre 2018 dernier, plusieurs faits mettant en exergue la moralité douteuse de l’homme, notamment  le scandale des faux observateurs de Transparency International,  sont venus renforcer au sein de l’opinion publique l’idée  que le ministre de l’Administration Territoriale serait un gangster donc les méthodes de barbouzes  trahiraient sa reconversion manquée toutes choses qui seraient contre-productives  pour la République. Et comme si cela ne suffisait l’assassinat d’un soldat de la Garde présidentielle le mois dernier et dont la vidéo de son assassinat a révolté tout le pays lui est attribuée. Pour jeter l’opprobre sur  les sécessionnistes les milices du ministre auraient perpétré cet acte pour que désormais les groupes séparatistes soient considérés comme des terroristes qui n’ont pour seul leitmotiv de créer la psychose au sein des populations

Dans  l’article intitulé **«*Paul Atanga Nji l’usinier de la contrefaçon ?*»**  qui fit d’ailleurs la  une de l’édition N0 65 de votre journal, nous  faisions écho  des interrogations de l’opinion public au sujet de la moralité même du ministre de l’Administration Territorial  eu égard à un certain nombre de grossiers montages à lui imputé (par cette même opinion publique), dans le but de prouver au président Paul Biya qu’il jouit d’un ardent soutien populaire. Les acteurs de la mise en scène du Minat avaient pour nom d’artistes : Un sombre cabinet américain dont le sondage donnait Paul Biya vainqueur de la présidentielle avec plus de 80% avant qu’on ne découvre que son patron n’était autre qu’un individu ayant une filiation avec le Minat ; un obscure groupuscule d’individu pompeusement baptisé G35, une coquille vide ayant des accointances avec le même Atanga Nji par le truchement entre autres de sa cellule de communication qui gérait l’intendance. Pour finir, des collectifs de conducteurs de moto taxi pèle-mêle appelant tous (*sans carte d’électeur ni carte d’identité encore moins de permis de conduire ainsi qu’il ressort systématiquement lorsqu’ils sont accidentellement contrôlés*) à voter pour Paul Biya,  le candidat du ministre Paul Atanga Nji.

Les interrogations de l’opinion publique devenaient donc légitimes sur le danger que ce type d’agissement du Minat pouvait avoir comme conséquences sur l’élection présidentielle en elle-même. En tout état de cause, nous étions à des années lumières d’imaginer, un seul instant, que  l’autre acte de faux dépasserait l’entendement.

**De faux observateurs de Transparecy International**

C’est moins de 48h après le vote que le scandale fera irruption avec la puissance d’un tsunami doublée  à celle d’un séisme sur la scène publique. De faux agents de transpareny international dûment accrédités par le ministère de l’administration territoriale  pour  jouer le rôle d’observateurs à l’effet de valider le bon déroulement des opérations de vote et donc le résultats sorti des urnes. Ce qu’ils feront tant et si bien que la télévision nationale la Crtv va leur accorder  une grande visibilité pour  que le chef de fils de ces laudateurs et faussaires Raphaël Kalfon, qu’accompagnaient Salomon Benros, Amanda Benzikri, Nurit Greenger  puissent déverser leurs florilèges de débilité en  satisfecit  générale pour Elecam l’organe en charge de l’organisation des élections au Cameroun. Un crime n’étant jamais parfait,  ces sorties médiatiques des faux agents de Transparency international  vont attirer l’attention du vrai Transparency. Dans un communiqué  sans équivoque Patricia Moreira, directrice générale du secrétariat international de Transparency International révèle «***Les individus apparus dans les différents reportages diffusés dans les médias camerounais n’ont aucune affiliation avec Transparency***» .Une enquête sommaire permettra de découvrir le pot aux rose. Ces faux membres de transparency international sont en fait des personnes invitées par la «*Cameroon Agence Presse* » proche du ministre de l’administration territoriale, et  dont le site internet a été créé en septembre 2018 soit un mois avant les élections. Cela confirme que c’est une agence fictive créée pour un but précis. Comment comprendre que le Minat qui a réduit de façon drastique (de 1200 à 40) les accréditations d’observateurs des Ong qui existent depuis plus d’une décennie  et ayant régulièrement couvert les élections comme un Monde à Venir de Philipe Nanga,  pour accréditer des gens dont la naissance se situait après la convocation du corps électoral ?

Suite à ce scandale  qui n’honore pas notre pays, le candidat du Mrc (Mouvement pour la Renaissance du Cameroun), Maurice Kamto envisage de porter plainte au Minadt (Ministère de l’Administration territoriale) et à la chaîne nationale Crtv (Cameroon Radio & Television). Si le scandale des faux observateurs à lui tout seul a suffi pour entacher la crédibilité du scrutin du 07 Octobre 2018, un autre fait imputable  au ministre de l’Administration Territoriale vient ajouter au discrédit à ces élections. La situation de  quasi inexistante du vote dans les deux régions anglophones en proie à une crise séparatiste.

***Taux de participation historiquement faible dans le nord-ouest et le sud-ouest***

sous la base des engagements du ministre de l’administration territoriale de garantir la sécurité des électeurs dans ces deux régions, Elecam avait maintenu les bureaux de vote  dans cette partie du territoire invitant les électeur à rejoindre les centres regroupés de voté .Pourtant les partis de l’opposition  à l’instar du Sdf de Joshua Osih avaient demandé de faire voter les déplacés inscrit sur les listes électorale à quel qu’endroit où ils se trouverait dans le pays du fait de l’unicité de la circonscription électorale lors de l’élection présidentielle. Berné par les assurances du Minat, Elecam va opposer une fin de non-recevoir à ce schéma  pourtant réaliste qui a permis au président du sénat Marcel Nyat Njifendji de voter en France alors qu’il est inscrit au Cameroun, idem pour les soldats en opération, les fonctionnaires en mission…

A l’arrivé, force est de constater que le Minat n’a pas tenu parole. Le vote dans le nord-ouest et le sud-ouest ont été une simple vu de l’esprit. Selon Hans de Marie Heungoup, chercheur à l’International Crisis Group (ICG), « *quasiment tous les retours qui nous parvenaient, situaient le taux de participation en deçà de 5% » dans les régions anglophones du Sud-Ouest et du Nord-Ouest où plus de 300.000 personnes ont dû fuir leur domicile »*. Il n’en fallait pas plus pour que le Sdf, univers  introduisent des recours en annulation totale  de ce scrutin mais aussi le  que le Mrc demande   l’annulation  partielle des votes au principal  motif  d’insécurité dans les régions anglophones.

***Atanga Nji laisse filer les faux observateurs de Transparency mais menace les libertés fondamentales des honnêtes citoyens camerounais***

Mais au lieu de répondre à l’opinion publique sur ces manquements graves qui portent atteinte à la sincérité du vote, au lieu de s’expliquer sur la sortie du territoire des faussaires qui s’étaient fait passer pour des observateurs  électoraux de Transparency International, le ministre Paul Atanga Nji verse dans la menace tous azimuts contre le Mrc notamment qui semble hanter ses nuits et ses journées. Comme  pris d’hystérie, il distribue a tout vent, des invectives, des menaces à peines voilées et remet en cause la liberté d’expression « *qui est de loin la seule note positive que même l’opposition met à l’actif des 36 ans du président Paul Biya au pouvoir »*.

La question que cette opinion publique se pose est de savoir jusqu’où ira le Minat Paul Atang Nji dans cette escalade de faits immoraux avant d’être arrêté dans sa course folle par celui qui l’a nommé à ce poste  il n’y a même pas encore 1 an?

«Briseur de grève», selon ses détracteurs, Paul Atanga Nji a choisi son camp. Farouche partisan de Paul Biya, il est celui qui s’opposera à John Fru Ndi sur ses terres, sans toutefois jamais se présenter à une élection locale. Il pourrait en être récompensé, d’autant qu’il s’entend bien avec le second maître d’Etoudi, le directeur du cabinet civil, Samuel Mvondo Ayolo.

***Catherine Ngaguene***

<https://lavoixducentre.cm/paul-atanga-nji-le-degre-zero-de-la-morale-publique-2>

1. **Intégralité du Message du Chef de l’Etat à la Nation**

Par

[**mercedes**](https://lavoixducentre.cm/author/mercedes)

 -

12 septembre 2019

*Yaoundé, le 10 septembre 2019*

**Camerounaises, Camerounais, Mes Chers compatriotes,**

Depuis près de trois ans, les régions du Nord-Ouest et du Sud-Ouest de notre pays sont en proie à une crise, qui met en péril la sécurité et le bien-être des  populations qui y vivent, mais a également de profondes conséquences sur l’ensemble de la communauté nationale.

Cette crise, faut-il le rappeler, est née des revendications corporatistes des Avocats et des Enseignants, qui réclamaient la traduction en langue anglaise des Actes Uniformes OHADA et la préservation de la spécificité du système judiciaire et du système éducatif anglo-saxon dans les deux régions.

Dès le départ, fidèle à  une  option  qui  m’est  chère,  j’ai  instruit  l’instauration  d’un dialogue entre le Gouvernement et les organisations syndicales en vue de trouver des réponses appropriées à ces revendications. Les mesures qui ont été prises par le Gouvernement à l’issue de ces concertations, sont allées bien au-delà des revendications de départ. Qu’il me soit permis d’en énumérer quelques unes :

–    la traduction en langue anglaise des textes OHADA a été effectuée. Ces textes sont désormais disponibles dans nos deux langues officielles ;

–    une Section de la Common Law a été créée à la Cour Suprême, afin de connaitre des pourvois formés contre les décisions des juridictions inférieures, dans les affaires relevant de la Common Law ;

–    au plan de la formation des Magistrats, une Section de la Common Law a été créée à l’Ecole Nationale d’Administration et de Magistrature. Cette mesure a été accompagnée d’un programme de recrutement des Auditeurs de justice et des Greffiers d’expression anglaise ;

–    par ailleurs, un recrutement spécial d’Enseignants bilingues a été mis en œuvre dans l’Enseignement secondaire ;

–    au plan judiciaire, un arrêt des poursuites a été ordonné en faveur de certaines personnes interpellées dans le cadre de ces revendications ;

–    Une   Commission   Nationale   pour    la   Promotion    du    Bilinguisme    et    du Multiculturalisme    a   été   créée,   afin   notamment   d’examiner   en   profondeur l’ensemble  des  sources  de  frustrations    de  nos  compatriotes  des  régions  du Nord-Ouest et du Sud-Ouest.

Par la suite, des décisions ont été prises pour accélérer le processus de décentralisation, avec en prime la création d’un Ministère dédié. Les prochaines élections régionales serviront à parachever ce processus, en permettant à nos compatriotes, sur l’ensemble du territoire national, de participer pleinement à la gestion de leurs affaires au niveau local.

**Mes Chers compatriotes,**

Malgré ces efforts du Gouvernement, des mouvements radicaux, principalement inspirés de l’étranger, ont récupéré et dévoyé les revendications corporatistes. Ils ont ainsi ourdi un projet sécessionniste avec pour but, la partition de notre pays. A cette fin, ils ont constitué et financé des groupes armés qui ont causé un lourd préjudice aux populations des régions du Nord-Ouest et du Sud-Ouest.

Le  monde  entier  a  été  témoin  des  atrocités  commises  par  ces  groupes  armés : mutilations, décapitations, assassinats des éléments des Forces de Défense et de Sécurité, des autorités administratives et des civils sans défense, destructions des infrastructures et édifices publics, incendie des écoles, des hôpitaux, etc.

Je voudrais saisir la présente occasion, pour réitérer mes condoléances les plus sincères et celles de la Nation tout entière à tous ceux qui ont perdu des êtres chers dans le cadre de cette crise. J’adresse également un message de réconfort aux blessés et à toutes les autres victimes à divers titres. Je leur donne l’assurance qu’ils peuvent compter sur la solidarité du Gouvernement de la République et sur celle de la Nation tout entière.

**Mes Chers compatriotes,**

Les exactions des groupes armés ont poussé des milliers de nos compatriotes à se réfugier dans les autres régions du pays, voire, pour certains, dans des pays voisins où ils sont réduits à la précarité. Face à ces actes intolérables, les Forces de Défense et de Sécurité ont pris des mesures énergiques, souvent au péril de leur vie, pour assurer leur devoir de protection des citoyens et de leurs biens. A l’heure actuelle, ces mesures commencent à porter leurs fruits avec l’amélioration de la sécurité et la reprise progressive des activités économiques  dans les deux régions.

**Mes Chers compatriotes,**

Depuis la survenance de cette crise, je n’ai ménagé aucun effort, avec l’aide de Camerounaises et de Camerounais de bonne volonté, pour rechercher les voies et moyens d’une résolution pacifique de celle-ci. Dans un souci d’apaisement, j’ai même décidé de l’arrêt des poursuites judiciaires pendantes devant les tribunaux militaires contre 289 personnes arrêtées pour des délits commis dans le cadre de cette crise. Dans le même ordre d’idées, j’ai adressé une offre de paix aux membres des groupes armés, en les invitant à déposer les armes et à bénéficier d’un processus de réintégration dans la société.  A cet effet, un Comité National de Désarmement, de Démobilisation et de Réintégration a été créé. Les Centres Régionaux de Désarmement accueillent progressivement de nombreux ex-combattants qui acceptent volontairement de déposer les armes. Nous allons continuer à déployer les efforts nécessaires pour que ce processus soit pleinement opérationnel.

Au plan humanitaire, j’ai décidé du lancement d’un vaste plan d’assistance à nos compatriotes éprouvés des régions du Nord-Ouest et du Sud-Ouest. J’ai également créé un Centre  de  coordination  de  l’action  humanitaire  chargé  de  mettre  ledit  plan  en  œuvre. Je voudrais à cet égard, dire merci aux partenaires internationaux qui nous accompagnent dans cette initiative.

**Mes Chers compatriotes,**

Pour expliquer cette crise, il a souvent été évoqué un sentiment de marginalisation qu’éprouveraient les populations du Nord-Ouest et du Sud-Ouest. Je voudrais à cet égard redire à nos compatriotes de ces régions, mais également à ceux des huit autres régions du Cameroun, que la marginalisation, l’exclusion ou la stigmatisation n’ont jamais inspiré l’action des différents Gouvernements que j’ai formés depuis mon accession à la Magistrature suprême de notre pays. Certes, aucune œuvre humaine n’est parfaite et dans un pays en développement tel que le nôtre, confronté à de multiples défis et ne disposant que de ressources limitées, de nombreux besoins restent encore insatisfaits, dans toutes les régions.

Fort du soutien massif que vous m’avez accordé lors de la dernière élection présidentielle, je continuerai à œuvrer sans relâche, avec toutes les filles et tous les fils de notre pays, à relever les multiples défis auxquels nous sommes confrontés pour améliorer le bien-être de nos populations, notamment  en matière d’infrastructures, d’approvisionnement en eau et en électricité, de couverture sanitaire et d’emploi des jeunes.

**Mes Chers compatriotes,**

Le 4 janvier dernier, j’ai procédé à un important remaniement ministériel, avec notamment la nomination d’un nouveau Premier Ministre, Chef du Gouvernement. Le choix de ces responsables a, comme à l’accoutumée, été principalement guidé par leurs qualités humaines et professionnelles, leurs compétences et leur expérience. Je voudrais néanmoins souligner que, fidèle à la politique d’équilibre régional que je n’ai cessé de promouvoir, j’ai choisi un Premier Ministre originaire de la région du Sud-Ouest. Son prédécesseur, qui a quant à lui passé près de dix ans à ce poste clé, était originaire de la région du Nord-Ouest. De fait, depuis le 9 avril 1992, les Premiers Ministres, Chefs du Gouvernement, ont été choisis parmi les ressortissants de ces deux régions.

Malgré cela, certains continueront à parler de marginalisation des populations de ces régions. En fait, il y a lieu de reconnaitre, au plan général, que la nature humaine est ainsi faite qu’il n’y aura jamais assez de postes de responsabilité pour satisfaire toutes les régions, tous les départements, les arrondissements, les villes, villages, familles et citoyens de notre pays. Chaque choix continuera de provoquer de la joie lorsque l’on sera distingué et de la tristesse lorsqu’on ne le sera pas. Il est cependant indispensable que nos mentalités évoluent sur ce point. S’il est nécessaire de tenir compte de l’équilibre régional dans des pays neufs, à la structuration sociologique diverse tel que le nôtre, il est indispensable de rappeler que les Ministres et autres responsables ne sont pas nommés seulement pour servir leurs régions, leurs villages ou leurs familles, mais l’ensemble de la communauté nationale. Ils doivent être au service de l’intérêt général et non des intérêts particuliers. C’est pourquoi, depuis mon accession au pouvoir, je n’ai cessé et je ne cesserai de mener, avec acharnement, la lutte contre la corruption et les détournements de fonds publics et de promouvoir la bonne gouvernance.

**Mes Chers compatriotes,**

Depuis la survenance de la crise dans les régions du Nord-Ouest et du Sud-Ouest, jamais le terme dialogue n’a été autant évoqué, prononcé, voire galvaudé. A l’interne comme à l’international, chacun y est allé de ses propositions et de ses suggestions. Certaines d’entre elles réalistes, d’autres nettement moins. Les conseils ont afflué.  Certains  avisés,  d’autres  intéressés.  D’aucuns  se  sont  même  risqués  à  des injonctions. Des  initiatives  multiples  et  diverses  ont  également  fleuri.  La  plupart  du  fait  de personnes de bonne foi, de pays ou d’organisations véritablement soucieux du devenir de notre pays et du bien-être de nos populations. Qu’il me soit permis de les remercier pour leurs efforts et leurs témoignages d’amitié.

Il y a toutefois lieu de remarquer que la prolifération de ces initiatives s’est parfois malheureusement appuyée sur des idées simplistes et fausses, procédant de la propagande sécessionniste. Il en est ainsi de la prétendue marginalisation des Anglophones, de la persécution de la minorité anglophone par la majorité francophone, du refus du dialogue par notre  Gouvernement  au  bénéfice  d’une     solution  militaire  à  la  crise  ou  encore  des accusations ridicules de génocide. S’agissant du dialogue lui-même, la question s’est toujours posée de savoir, Avec qui ? Les nouvelles technologies de l’information et de la communication et notamment les réseaux sociaux ont malheureusement favorisé l’apparition de leaders autoproclamés, d’extrémistes  de  tout  bord  essayant  d’asseoir  leur  notoriété  par  le  biais  d’injures,  de menaces, d’appels à la haine, à la violence et au meurtre.

Or, tuer des gendarmes ou des civils, kidnapper, mutiler, molester, incendier, détruire des infrastructures publiques, empêcher les enfants d’aller à l’école ou les populations de vaquer tranquillement à leurs occupations n’a jamais été, dans aucun pays au monde, source de légitimité pour représenter ou s’exprimer au nom des populations justement victimes de ces exactions. En démocratie, seule l’élection confère une telle légitimité.

**Mes Chers compatriotes,**

Les nombreuses consultations que je n’ai cessé de mener au sujet de cette crise, m’ont permis de prendre la mesure de l’ardent désir des populations des régions du Nord- Ouest et du Sud-Ouest de retrouver le cours normal de leurs vies, de pouvoir de nouveau, en toute sécurité, exercer leurs activités économiques et sociales, de voir les réfugiés et les personnes déplacées revenir et les enfants retrouver le chemin de l’école. La récente tournée du Premier Ministre dans les deux régions a permis de confirmer ce sentiment.

J’ai la ferme conviction, à cet égard, que le moment est venu de mobiliser toutes les forces positives et constructives de notre pays, à l’intérieur comme dans la diaspora, pour que ce désir devienne une réalité.

***C’est pourquoi, j’ai décidé de convoquer,  dès la  fin du  mois  en  cours,  un  grand dialogue national qui nous permettra, dans le cadre de notre Constitution, d’examiner les voies et moyens de répondre aux aspirations profondes des populations du Nord-Ouest et du Sud-Ouest, mais aussi de toutes les autres composantes de notre Nation.***Le  dialogue  dont  il  est  question,  concernera  principalement  la  situation  dans  les régions du Nord-Ouest et du Sud-Ouest. Mais il est évident qu’en cela même il touchera à des questions d’intérêt national, telles que l’unité nationale, l’intégration nationale, le vivre- ensemble, il ne saurait intéresser uniquement les populations de ces deux régions. Il aura donc vocation à réunir, sans exclusive, les filles et les fils de notre cher et beau pays, le Cameroun, autour de valeurs qui nous sont chères : la paix, la sécurité, la concorde nationale et le progrès.

Il s’articulera également autour de thèmes susceptibles d’apporter des réponses aux préoccupations des populations du Nord-Ouest et du Sud-Ouest, ainsi qu’à celles des autres régions  de  notre  pays :  le  bilinguisme,  la  diversité  culturelle  et  la  cohésion  sociale,  la reconstruction et le développement des zones touchées par le conflit, le retour des réfugiés et des personnes déplacées, le système éducatif et judiciaire, la décentralisation et le développement local, la démobilisation et la réinsertion des ex-combattants, le rôle de la diaspora dans le développement du pays, etc.Présidé par le Premier Ministre, Chef du Gouvernement, ce dialogue réunira une palette  diverse  de  personnalités :  parlementaires,  hommes  politiques,  leaders  d’opinion, intellectuels,  opérateurs économiques,  autorités traditionnelles,  autorités religieuses, membres de la diaspora, etc. Seront également invités des représentants des Forces de Défense et de Sécurité, des groupes armés et des victimes. Tout le monde ne pourra, et c’est compréhensible, prendre effectivement part à ce dialogue, mais chacun aura l’occasion d’y contribuer. En  amont   de   la   tenue   effective   du  dialogue,   le  Premier  Ministre,   Chef  du Gouvernement, mènera de larges consultations, afin de recueillir les avis les plus divers, qui serviront de sources d’inspiration pour la conduite des débats. Des Délégations seront également envoyées dans les prochains jours à la rencontre de la diaspora, afin de lui permettre d’apporter sa contribution à ces réflexions sur la résolution de la crise.

Je voudrais à cet égard en appeler au patriotisme et au sens des responsabilités de tous nos compatriotes de l’intérieur comme de la diaspora pour que chacun, où qu’il se trouve, saisisse cette opportunité historique pour contribuer à conduire notre pays sur les chemins de la paix, de la concorde, de la sécurité et du progrès.

**Mes Chers compatriotes,**

La propagande des sécessionnistes a voulu présenter les décisions de justice récemment rendues à l’encontre d’un certain nombre de nos compatriotes, dans le contexte de cette crise, comme un obstacle au dialogue envisagé.

Il n’en est rien. Je voudrais d’ailleurs en profiter pour préciser que le respect de la règle de droit et la lutte contre l’impunité constituent les piliers de la consolidation de l’Etat de droit, à laquelle nous aspirons tous. Fouler aux pieds la règle de droit et assurer l’impunité à certains citoyens, aboutiraient à préparer le lit de l’anarchie. Il est donc fondamental, à ce stade, de dissiper les rumeurs selon lesquelles, l’on peut tranquillement piller, violer, incendier, kidnapper, mutiler, assassiner, dans l’espoir qu’un éventuel dialogue permettra d’effacer tous ces crimes et assurera l’impunité à leurs auteurs. Une telle façon de penser ne peut qu’encourager la perpétuation des violences dans les régions en crise et même en susciter dans les régions où il n’y en a pas, ainsi que nous l’enseigne l’expérience vécue par plusieurs pays dans le monde. Il est toutefois vrai que dans le cadre d’un dialogue, d’un processus de paix ou de réconciliation nationale, il puisse être envisagé l’éventualité d’un pardon, dans certaines conditions. Il est tout également vrai qu’aux termes de notre Constitution, le Chef de l’Etat est habilité à user d’un droit de grâce. C’est d’ailleurs fort de cette habilitation que j’ai adressé, lors de ma récente prestation de serment, une offre de paix aux membres des groupes armés.

Je voudrais solennellement réitérer en ce jour cette offre. Ceux qui volontairement déposent les armes et se mettent à la disposition des centres de DDR, n’ont rien à craindre. Leurs camarades qui s’y trouvent déjà peuvent en témoigner. En revanche, ceux qui persisteront à commettre des actes criminels et à violer les lois de la République, feront face à nos Forces de Défense et de Sécurité et subiront toute la rigueur de ces mêmes lois. Il en est  de  même  des  promoteurs  de  la  haine  et  de  la  violence  qui,  confortablement  et impunément installés dans des pays étrangers, continuent à inciter au meurtre et aux destructions. Qu’ils sachent qu’ils devront tôt ou tard rendre des comptes à la Justice.

J’en appelle justement aux pays qui abritent ces extrémistes. S’ils se soucient réellement de la situation des populations du Nord-Ouest et du Sud-Ouest, qu’ils agissent contre ces criminels. La plupart n’ont plus la nationalité camerounaise, mais ils passent leur temps  à  collecter  des  fonds  pour  perpétrer  des  actes  terroristes  au  Cameroun,  à commanditer des incendies, des kidnappings et des assassinats et à lancer des mots d’ordre pour empêcher les enfants d’aller à l’école et les citoyens de vaquer tranquillement à leurs occupations.

**Mes Chers compatriotes**,

La communauté nationale tout entière fonde de grands espoirs sur les assises que je viens d’annoncer. Elle espère y voir l’opportunité pour nos frères et sœurs du Nord-Ouest et du Sud-Ouest de tourner cette page particulièrement douloureuse, d’oublier leurs souffrances et de retrouver une vie normale. Elle espère également voir notre pays poursuivre résolument sa marche vers le progrès, grâce à une réflexion féconde sur les voies et moyens de créer les  conditions  d’une    exploitation  optimale  des  ressources  naturelles  et  du  formidable potentiel humain que recèle notre pays. Nous devons donc tous œuvrer à leur succès.

**Mes Chers compatriotes,**

Au fil du temps, nous avons su tirer parti de notre formidable diversité linguistique et culturelle, du talent de nos filles et de nos fils, de nos efforts et de nos sacrifices méritoires, pour bâtir un pays solide et une Nation forte. Ensemble nous avons relevé de nombreux défis et remporté d’innombrables victoires. Nous avons prouvé que lorsque nous sommes unis, il n’y a pas de difficulté que nous ne puissions surmonter, d’obstacle que nous ne puissions franchir. Nous l’avons prouvé hier. Nous le prouverons encore aujourd’hui et demain. L’avenir de nos compatriotes du Nord-Ouest et du Sud-Ouest se trouve au sein de notre République.

**Le Cameroun restera un et indivisible. Vive le Cameroun !**

<https://lavoixducentre.cm/integralite-du-message-du-chef-de-letat-a-la-nation>

1. **Ce pourquoi le GDN a connu des réfractaires**

Par

[**La Voix du Centre**](https://lavoixducentre.cm/author/lavoixducentre)

 -

9 octobre 2019

***Avec une crise dont les motifs de mise en œuvre et de revendication étant connues, pour un but de ramener la paix dans le Noso, les acteurs clés à même de résoudre ce problème devraient s’asseoir sur un terrain neutre afin de se dire les vérités***

L’illustration sur la souveraineté de la presqu’ile de Bakassi le 21 décembre 1993, entre le conflit opposant les forces armées Nigérianes et Camerounaises et, notamment les démarches entreprises en matière de recherche de paix, nous ont d’avantage outillé sur l’action à mener, lors des négociations que peuvent connaître la présence des forces androgènes et exogènes. Pour mémoire en effet, ces démarches pacifiques se sont soldées par les accords historiques de Greentree, le 12 juin 2006. Lesquels accords ont révèlé le 14 août 2013, la plénitude de la souveraineté de l’Etat du Cameroun sur la péninsule de Bakassi après une période de transition de cinq ans.

Si l’on s’en tient à cet exemple fortement illustratif, les acteurs clés que connaissent cette crise devraient, pour les motifs de paix, s’asseoir sur un terrain neutre accompagné par un médiateur choisi par les parties prenantes. Le but bien sûr étant de se regarder en face et d’en trouver enfin des mesures de solutions devant mettre un terme définitif à cette crise qui, depuis 03 ans, a déjà fait perdre à l’Etat du Cameroun des Milliards chaque mois, notamment, des pertes en biens matériels et en vies humaines ainsi que des milliers de déplacés.

***La Grande Duperie Nationale***

 » *L’occasion a été donné aux Camerounais de démanteler à tout jamais cette structure maudite de l’Etat en place afin d’en bâtir un Etat qui épouse les valeurs de la nation ».* Dénonce Dieudonné Essomba, économiste avant de poursuivre ; *» Le Cameroun n’a pas un problème de pouvoir (…) Il a un problème de forme de l’Etat. Cela signifie que la présence de Biya n’est pas contestée par une part significative de Camerounais mais plutôt de son entourage. Très peu de Camerounais sont d’accord avec ce système centralisé qui momifie et étouffe le Cameroun sous une bureaucratie parasitaire. Mis à part quelques contestataires, Biya est considéré comme le président légal et  légitime du Cameroun*« .

Ancré dans leur passé d’autonomie fédérale le système anglophone à fini par prendre les armes contre ce modèle fort périmé de mensonges et d’intérêt égoïstes. Une fratricide qui coûte des sueurs, des larmes et de l’argent. Après l’avoir sous-estimé, Biya a fini par se rendre à l’évidence à la réforme fondamentale de l’Etat en invitant tout le monde au dialogue pour apaiser les esprits au soir de son règne.

Sauf que, pour ce dialogue d’envergure national, d’aucuns se sont vues une autre occasion de s’en approprier la gestion exclusive de « la mangeoire » dans de formes de ruses de ce qu’est « l’Etat unitaire ». A en croire une fois de plus Dieudonné Essomba*, » le Cameroun sera fédéral. Il restera un et indivisible mais, il ne sera plus unitaire. On ne peut pas inviter tout le monde, y compris les chefs de la sécession et espérer encore maintenir la décentralisation du Rdpc. Et pour ceux qui parlent de bonne gouvernance, nous leur demandons d’aller d’abord la prouver dans leurs Etats régional tout le monde voit (…) ».*

***Début d’une ère nouvelle?***

L’occasion pour les Camerounais de changer un système basé sur le faux, la corruption et le favoritisme vers une structure plus méritante leur a été donnée. Le cas du MRC en est indicatif. Car hier arrêtés pour « rébellion », la clémence de Paul Biya étant entrée en scène, ils ont fini par être libérés pour motif de « contestation des élections ». Dans tous les cas, Paul Biya aura montré sa main tendue pour le retour à une paix significative.

Les rencontres de Yaoundé lors de ce  Grand Dialogue national (GDN) a en effet donné lieu à un réceptacle de résolutions d’éléments clés, pour la survie du Cameroun. Lesquelles, éléments de résolutions on espère ne pas retrouver dans le tiroir des oubliettes. Car, Proposer étant antonyme d’adopter.

<https://lavoixducentre.cm/ce-pourquoi-le-gdn-a-connu-des-refractaires>

1. **Bernard Acho Muna – Le combattant repose à Mbengwi**

Par

[**La Voix du Centre**](https://lavoixducentre.cm/author/lavoixducentre)

 -

10 novembre 2019

[0](https://lavoixducentre.cm/bernard-acho-muna-le-combattant-repose-a-mbengwi#respond)

277

***Décédé le 06 octobre dernier de suite de maladie, le bâtonnier a été inhumé samedi dernier après d’ultimes hommages bien mérités.***

Après un séjour sur terre où il a pleinement travaillé, Bernard Acho Muna repose pour l’éternité dans sa région d’origine le Nord-ouest. Pour ce combattant des libertés individuelles, du droit civique et politique des Camerounais, on pourrait reprendre ce couplet : « *dors bien aimé, ton œuvre est terminée, voici pour toi le soir de la journée. Du grand repos l’heure est enfin sonnée, à  Dieu* ». Il l’a bien mérité ce doux repos après s’être rompu à la tâche comme procureur du tribunal pénal international pour le Rwanda entre 1997 et 2002, avocat de renom et bâtonnier de l’ordre des avocats du Cameroun. Décédé à l’âge de 79 ans suite à une maladie cardiaque, le frère ainé de Akere Muna et fils de Salomon Tandeng Muna  a été candidat à la présidentielle de 2011 avant de soutenir son cadet à celle de 2018 sous la bannière de l’alliance des Forces progressistes (Afp) dont il a été fondateur. Ben Muna comme beaucoup aimaient l’appeler était connu pour son militantisme pour les causes nobles. Il s’est d’ailleurs illustré en 1660 lors de sa plaidoirie au procès de Yondo Black pour subversion.

Le lors de ses obsèques le weekend dernier, il a reçu les hommages du corps judiciaire après la mise en bière à l’hôpital gynéco-obstétrique de Yaoundé. il a par la suite été conduit à sa dernière demeure à**Mbengwi** dans la région du Nord-ouest où sévit la crise sécuritaire dite anglophone.

***Marie-France Ibel***

<https://lavoixducentre.cm/bernard-acho-muna-le-combattant-repose-a-mbengwi>

1. **Migration et développement – L’Unesco veut réduire les pertes en vies humaines**

Par

[**La Voix du Centre**](https://lavoixducentre.cm/author/lavoixducentre)

 -

20 décembre 2019

[0](https://lavoixducentre.cm/migration-et-developpement-lunesco-veut-reduire-les-pertes-en-vies-humaines#respond)

461

***Près de 2 Milliards de FCFA mises à disposition pour booster les jeunes à renforcer leurs capacités en interne afin d’éviter le mal être des causes d’une migration mal organisée***

Il est on ne peut plus clair que, le contexte sociopolitique actuel que vit l’Etat du Cameroun notamment des crises dans sa partie anglophone du nord-ouest et du sud-ouest et aussi, les exactions de Boko-haram dans le grand nord, favorisent une migration vers l’inconnu peu ou prou organisée. Le but étant bien sûr d’aller à la recherche du mieux être.
Le cas du Cameroun en est fort révélateur. En effet, le pays d’Eto’o Fils se vide chaque année de près de 27% de sa population essentiellement jeune au profit des migrations, poussées par des conditions socioéconomiques, le sous-emploi, le chômage et la mauvaise gouvernance.
Un côte d’alerte qui a servi de prétexte au bureau régional de l’Organisation des Nations Unis pour l’Education la Science et la Culture (Unesco) pour l’Afrique Centrale en collaboration avec l’Agence Italienne pour le développement et la Coopération, d’apporter les éléments de réponses sur ce phénomène qui prend de l’ampleur. A en croire Christian Ndombi chef du secteur Culture, « C’est un projet régional qui entend contribuer à affranchir les jeunes de l’idée d’un départ à tout prix et à tous les prix vers la recherche d’un inconnu eldorado. Le projet « autonomiser les jeunes en Afrique à travers les médias et la communication » compte outiller les médias de 8 pays d’Afrique au rang desquels le Cameroun sur les risques liés aux migrations tout en contribuant au renforcement inclusif de l’employabilité des jeunes et des journalistes « .
Pour Rovoletto Giuseppe le chef de programme de la coopération Italienne, « c’est un projet qui entend assurer l’accès équitable aux opportunités que nous offrons. Nous rappelons que ce sont des initiatives qui existent mais qui sont mal connues du public jeune ».

Lionnel Bayong Fils

<https://lavoixducentre.cm/migration-et-developpement-lunesco-veut-reduire-les-pertes-en-vies-humaines>

1. **Maurice kamto face à la presse ce jour à Paris courtise les médias français et se justifie sur les raisons du boycott des élections**

Par

[**La Voix du Centre**](https://lavoixducentre.cm/author/lavoixducentre)

 -

30 janvier 2020

En tournée à l’hexagone depuis le 28 janvier dernier, le leader du MRC a été face à la presse cet après-midi. Les échanges ont principalement porté sur la crise en région anglophones et le refus de prendre part  aux élections législatives et municipales. Le professeur de droit a mis en relief le contexte socio-politique qui prévaut actuellement au pays et qui forcément ne  garantirait pas la transparence du scrutin à venir.

L’homme politique s’est dit prêt à assumer toutes les conséquences de cette décision tant pour lui que pour beaucoup de ses partisans qui n’ont pu candidater. Par ailleurs l’avocat international souhaiterait que la France s’implique d’avantages aux maux qui minent le Cameroun actuellement.

**Manguelle Moualal II**

<https://lavoixducentre.cm/maurice-kamto-face-a-la-presse-ce-jour-a-paris-courtise-les-medias-francais-et-se-justifie-sur-les-raisons-du-boycott-des-elections>

1. Massacre de Ngarbuh le Gouvernement qualifie Human Rights Watch « d’usine à mensonges »

Par

[**La Voix du Centre**](https://lavoixducentre.cm/author/lavoixducentre)

 -

28 février 2020

310

[0](https://lavoixducentre.cm/massacre-de-ngarbuh-le-gouvernement-qualifie-human-rights-watch-dusine-a-mensonges#respond)

***René Emmanuel Sadi a qualifié ce rapport de « partial et à charge contre le Cameroun », au cours d’un point de presse tenu  le jeudi 27 Février 2020 à Yaoundé. Il était accompagné pour la circonstance  des responsables du ministère de la défense qui se sont prêtés à un exercice de diverses projections d’images et vidéo comme preuves d’une armée républicaine***.

Le ministre de la communication, porte-parole du gouvernement, a donné  le jeudi 27 février 2020, un point de presse dans l’auditorium de son département ministériel à Yaoundé avec à ses côtés des responsables du Ministre de la défense. Au nom du gouvernement camerounais, il a donné les clarifications suite  au dernier rapport de Human Rights Watch sur le massacre des populations civiles le 14 février 2020 à Ngarbuh, un village au Nord-Ouest, l’une des deux Régions anglophones en proie à une guerre d’indépendance.

Ce rapport publié le 25 février dernier par  l’ONG internationale accuse de façon disproportionné l’armée camerounaise d’être l’auteur de la tuerie de Ngarbuh, non sans affirmer que le bilan est de 21 personnes civiles dont une femme et treize enfants.

Aussi, le gouvernement camerounais a de nouveau rejeté ce rapport, justifiant qu’il n’ya pas eu d’enquête, ni investigation de cette organisation. «L’ONG  Human Rights Watch », à l’instar de plusieurs autres groupes revendiquant le statut d’activistes politiques ou de défenseurs des droits humains, s’est empressée de publier un bilan erroné de ce regrettable incident, tout en décrivant avec force détails et de façon fantaisiste, les péripéties supposées de l’enchaînement des faits, ainsi que les auteurs présumés, sans avoir effectué la moindre descente sur le terrain, ni une quelconque investigation », déclaré le porte parole du gouvernement.

Le Gouvernement camerounais dénonce fermement cette démarche, qui illustre sans conteste toute la mauvaise foi de ces organisations, inlassablement déterminées à porter atteinte à l’image du Cameroun et à la stabilité de nos Institutions » a déclaré le porte-parole du gouvernement. Ce dernier en a profité pour s’insurger contre le comportement de certaines organisations internationales sur le terrain de la crise sécuritaire dans les Régions anglophones.

Le gouvernement va plus loin et dit «  détenir  depuis quelques jours des preuves irréfutables établissant  des liens entre d’une part ,Madame ILaria Allegrozzi, présentée comme chercheuse senior au sein de l’ONG Human Rights Watch ,auteur du rapport biaisé incriminant les forces armées camerounaises, et d’autre part ,de nombreux terroristes sécessionnistes qui mettent régulièrement à sa disposition et à sa demande ,depuis  le début de la crise dans les régions du Nord-Ouest et du Sud-ouest ,des photographies, des vidéos, ainsi que des informations sur leurs diverses abominations, afin que celles-ci servent plutôt d’arguments à charge contre nos forces de défense et de sécurité », a fait remarquer le patron de la communication, avec pour preuve à l’appui, le cas du terroriste  NFOR YACUBU dont l’exploitation de son téléphone a été fructueuse ,ayant établi des liens suspects avec Madame ILaria Allegrozzi  .

Aussi, les prétendues investigations dans ces régions selon cette ONG se sont limitées aux contre-vérités inventées par son acolyte terroriste, au moyen de techniques de trucages sophistiqués. Pour donner une mauvaise image de l’armée camerounaise, le porte parole du gouvernement a expliqué que la plupart de ces terroristes se déguisent en policiers, gendarmes et militaires ,en arborant les tenues des forces nationales de défense et de sécurité, pour tromper la vigilance des populations et commettre les violences les plus atroces, sous l’étiquette de l’armée.

Cette déclaration du gouvernement s’est achevée par des projections des photos et vidéos par les responsables du ministère de la défense. On a eu droit dans cet exercice à la présentation des actions civilo-militaires dans le domaine social. D’autre part des images des atrocités commises par  les sécessionnistes contre l’armée et les populations ont été présentées, afin de montrer la gravité de la situation.

<https://lavoixducentre.cm/massacre-de-ngarbuh-le-gouvernement-qualifie-human-rights-watch-dusine-a-mensonges>

1. **Titus Edzoa**

Par

[**La Voix du Centre**](https://lavoixducentre.cm/author/lavoixducentre)

 -

4 mars 2020

[0](https://lavoixducentre.cm/titus-edzoa#respond)

514

Aimer son pays c’est prendre position dans des situations de crise. C’est le cas de l’ancien ministre Titus Edzoa qui  a fait des recommandations au président camerounais pour une sortie définitive de la crise dite anglophone. Sur les ondes d’une radio locale  dans la matinée du vendredi 25 janvier 2019. Titus Edzoa, a rappelé que la situation sécuritaire qui prévaut actuellement dans le Nord-ouest et le Sud-ouest camerounais relevait uniquement de la responsabilité du président Paul Biya. Aussi il  a fait des propositions pour que cette crise qui dure depuis plus de deux ans déjà connaisse enfin son dénouement. D’après lui, le chef d’Etat camerounais serait à la fois le problème et la solution de cette guerre. Ainsi, il invite ce dernier, dans un premier temps, à ordonner le retrait immédiat des troupes de l’armée camerounaise de la zone anglophone.

Il ne s’agit en aucun cas d’abandonner cette partie du pays aux séparatistes, précise-t-il, cependant c’est une démarche stratégique inconditionnelle qui servirait de base pour instaurer un authentique dialogue inclusif. Pour éviter que les mêmes causes ne reproduisent les mêmes effets, il préconise que les problèmes qui sont à la base de ce conflit soient sincèrement discutés et que les décisions qui en sortiront soient véritablement applicables et appliquées. Dans sa recommandation majeure, le professeur en médecine invite S.E. Paul Biya à sortir de la logique des procurations et à s’impliquer personnellement et pleinement dans le processus de résolution de cette crise meurtrière.

<https://lavoixducentre.cm/titus-edzoa>

1. **Fonction publique – 8766 agents de l’Etat relevant du Code du Travail et fonctionnaires suspendus**

Par

[**La Voix du Centre**](https://lavoixducentre.cm/author/lavoixducentre)

 -

29 avril 2020

***Joseph Le a publié les listes sur le site internet du ministère de la Fonction Publique et de la Réforme Administrative. Les concernés sont invités à produire des explications pour justifier leurs absences.***

Le ministre de la fonction publique et de la reforme administrative est déterminé à voir clair sur cette situation qui pénalise le fonctionnement de l’administration ainsi que l’économie du Cameroun malgré la pandémie du Covid-19, s’engageant ainsi à faire prévaloir l’éthique et la déontologie qui lui sont chers. Ce sont près de 8766 agents publics qui sont suspendus de solde depuis fin 2019 à la suite d’une série de décisions du ministre de la Fonction Publique et de la Réforme Administrative (MINFOPRA), Joseph LE, constatant leurs absences irrégulières à leurs différents postes de travail. Parmi eux, 3721 sont des agents de l’Etat relevant du Code du Travail et 5045 des fonctionnaires. Dans une note d’information publiée le 24 avril, le MINFOPRA, renseigne que les listes nominatives sont consultables sur le site internet de son ministère, www.minfopra.gov.cm.Les concernés sont invités à produire des explications pour justifier leurs absences. En raison du COVID-19 et des mesures de distanciation sociale, ils peuvent le faire soit par e-mail, ou par WhatsApp. Faute de quoi, prévient le MINFOPRA, ils s’exposent aux sanctions disciplinaires prévues par la réglementation en vigueur.

Au terme des demandes d’explications en cours et des réponses y afférentes, plusieurs options s’offrent: reprise en solde, avertissement, blâme, abaissement d’échelon, abaissement de la catégorie, licenciement etc. Le gouvernement camerounais le salaire de 8 766 fonctionnaires. La décision a été rendue publique par le ministre de la Fonction publique et de la Réforme administrative
Le ministre a souligné dans sa déclaration que ce sont les fonctionnaires dont la majorité sont des Camerounais du Sud fuyant la crise dans les régions anglophones fuyant la guerre qui sont suspendus de leur rémunération dans le cadre du décompte physique des personnels d’État, lancée en avril 2018 par le ministère des Finances.
Rappelons que bien avant, dans un communiqué du gouvernement du Cameroun, le ministre de la Fonction publique avait déclaré que cela concernait 3721 employés de l’État relevant du Code du travail et 5045 fonctionnaires. Les mis en cause sont accusés d ‘«absence irrégulière», de «démission» ou de «mort» et ont été priés de contacter avec effet immédiat le ministère de la Fonction publique. Ce n’est pas une surprise pour les concernés qui depuis plusieurs mois sont interpellés par le patron du Minfopra et ses collaborateurs. Les fruits de cette opération font état de ce que depuis deux ans, l’opération de comptage physique des employés de l’État lancée en avril 2018 a déjà identifié et expurgé quelque 10000 fonctionnaires fictifs permettant d’économiser à l’état 30 milliards de FCFA en 2019.

***Jean Claude KENDEG***

<https://lavoixducentre.cm/fonction-publique-8766-agents-de-letat-relevant-du-code-du-travail-et-fonctionnaires-suspendus>

1. **Fête de l’Unité 2020 – Unité de la Nation, Unité des cœurs, Unité de tous**

Par

[**La Voix du Centre**](https://lavoixducentre.cm/author/lavoixducentre)

 -

17 mai 2020

***Un Appel spécial à l’unité d’un Camerounais***

Chers frères et sœurs dans la patrie, le sort a voulu que nous soyons unis dans ce paysage vide de célébrations, mais pourtant aussi vivant, en cette édition spéciale du 20 Mai 2020. Pour cette Fête de cet An spécial 2020, qui a une allure particulière imprimée par la pandémie mondiale dûe au Covid-19, notre pays ne sera pas le seul à se soustraire à la visibilité physionomique des réjouissances liées au bonheur fréquent et répétitif de notre peuple à se remémorer la structure macromoléculaire de notre Nation. Je me permets comme tout camerounais soucieux de la Paix et du Progrès de sa Nation aurait pu faire, c’est-à-dire communiquer sur ce qui fonde le ciment de notre présent et détermine le futur de nos enfants, et spécifiquement la partie fondamentale de la cohésion constitutive de cette Nation, et qui se trouve être l’UNITE de nos deux entités Anglophones et Francophones. Rappeler que hier nous fûmes deux, et que aujourd’hui nous sommes un seul pays souverain, c’est reconnaître que nous avons tous payé un prix pour la dignité et l’honneur individuels de notre pays, en nous dotant d’un Etat Républicain, Unitaire, Laïque, Bilingue et très récemment Décentralisé, afin que nous puissions ensemble mieux nous adapter à nos responsabilités réelles. Et pour évaluer à chaque fois la valeur énergétique de cette unité conventionnelle souhaitée qui nous conduit chaque an à la révérence de cet acte, il a fallu mettre en place un système politique qui devait faire un choix entre le Passé et l’Avenir, entre une voie facile de l’individualisme régional et une voie difficile, mais pourtant plus prospère, de l‘élimination de la pluralité des mondes qui elle sert généralement à voiler les misères des exploités, plutôt que de mettre à la disposition du peuple profond toutes les richesses de son pays. La subordination de tous les corps et de toutes les institutions, quelles qu’elles fussent à la suprématie de notre Etat et des lois qui régissent la vie des populations profondes de notre Nation, aura nécessité une unité remarquable de notre législation sans laquelle un morcellement législatif inadéquat, nous aurait fait reposer notre sort et notre destin commun aux mains de la prédation et de ceux qui seraient plus forts que nous. Formés pour être des relais perpétuels et permanent de cette unité initiale du Cameroun, les Cadres tant administratifs que politiques de notre pays n’ont pas toujours su discerner entre l’esprit de cette convention de la réunification des deux camerouns, et les lettres des textes qui y sont contenus, plongeant encore plus la masse inculte ou éloignée des intérêts supérieurs de notre Nation, dans une ardeur fétide de sécularisation complète de notre société, donc de notre République.

Devant les inventaires des aspirations sociales des populations tant citadines que rurales, la Réforme de l’Etat Décentralisé revêt une importance capitale pour les nouvelles missions de notre Etat, et qui sont la ‘‘consolidation’’ de notre Indépendance et la sauvegarde des acquis de notre Unité Nationale ; car donner un caractère de ‘‘Statut Spécial ’’ aux deux régions du Nord et Sud Ouest, c’est octroyer une unité de souveraineté populaire auxdites régions, afin de mesurer les distances de développement interne entre les objectifs de la Nation définis à l’origine, et ceux participatifs que devront alors impulser les Collectivités territoriales Décentralisées, qui elles désormais devront aller de pair avec la marche de la société camerounaise nouvelle. Les engagements de l’Etat à mettre à la disposition des 360 communes de notre pays les Fonds de Solidarité Sociale et les dons du couple présidentiel en lien avec la pandémie Covid-19, imposent aux élus locaux une nouvelle impulsion dans l’édification d’une nation plus solidaire, acquise à la défense des intérêts des nouvelles c lasses sociales et tournée à libérer les démunis d’une contamination éventuelle ou potentielle, sachant que un camerounais contaminé et/ou qui décède affecte tous les autres camerounais. Les responsabilités de ces élus locaux, au-delà des réflexions pointues sur la révision et la modernisation des offres en soins et services de santé de leurs localités respectives, devraient aussi faire prospérer des politiques collectives ‘‘d’unité de voisinage’, unités susceptibles d’assurer l’intégration des collectivités et de développer la participation à des actions quotidiennes communes en faveur des masses profondes. Aucun de nos enfants appelés à reprendre le chemin de l’Ecole très prochainement ne devrait donc pas mourir de Covid-19, sachant qu’ils sont le prolongement eux et leurs enseignants, de la bataille de notre unité et sans lesquels d’ailleurs nous manquerions de futurs cadres patriotes et attachés à leur Nation. Plus que de tenir les examens de fin d’année et de clôturer les années scolaires et académiques, notre système éducatif ne doit plus persister dans une voie de dépendance qui retarde son développement tout en maintenant ses privilèges. La spécificité du sous-système Anglophone sur l’ensemble de notre système éducatif, est un outil charnier pour débarrasser notre pays des complexes issus de notre mode généralisé de formation par palliers, et qui tendrait à faire croire que les différents niveaux et secteurs de l’Education ne constitueraient pas des maillons imbriqués les uns les autres. Et parce que notre Unité a besoin d’éléments conscients permettant de faire accéder à la dignité d’hommes adultes nos apprenants, il faut que les Intellectuels Enseignants puissent volontairement s’inviter et s’associer aux instants fertiles qui meublent à chaque fois ce moment mémorable de la vie de notre Nation, en en concevant les grandes lignes de par leurs productions intellectuelles liées aux circonstances inoubliables de notre passé commun, tout en traçant une politique nationale d’Education de longue haleine et censée effacer l’existence des structures éducatives institutionnelles influencées par un passé ou un système éducatif colonial. Seuls les enseignants sont capables de fournir à la Nation, grâce à leur appréhension du terme UNITE et du sens du mot EMERGENCE, de leur portée, ainsi que de leur pouvoir de contribution à l’approfondissement de leurs contenus, une « souveraineté éducative endogène » qui ne serait pas un creuset d’une éducation diminuée, sans force, et donc pouvant faire face aux oppressions multiples des diplômés issus des autres sous-système éducatifs mondiaux.

Chers frères et sœurs, la tuerie dernièrement du Maire de Mamfé par des mouvements rebelles nous a rappelé que la marche vers la paix et l’Unité dans notre pays ne saurait être un acquis, tant il est vrai que ces deux valeurs reposent essentiellement sur des principes intangibles d’équité, de la recherche d’un meilleur équilibre social et d’une répartition plus saine de profits et des charges. Issue des dernières résolutions du Grand Dialogue National et Inclusif, cette nouvelle cuvée de maires et dont faisait partie ce maire lâchement assassiné, constitue l’avènement futur de la détente sociale et des bienfaits d’un ‘‘ Municipalisme’’, introduisant la coexistence pacifique entre les différentes entités de notre Nation qui se sont déchirées jusque-là. Tuer ou agresser des personnalités politiques ne peut pas faire progresser ou ne pas édifier un Etat qui se veut fort, défendant les droits des peuples et jouissant du respect de tous, surtout si cela est orchestré par des leaders de l’Indiscipline et de l’Insurrection, appliquant sur notre territoire des principes néolibéraux révolutionnistes, entretenus ou /et soutenus par des réalités de division et de manipulation des conflits armés venant d’outre-mer. Car faut il le rappeler, nos intentions de conquête du pouvoir par le Suffrage Universel ne sont pas toujours dans les logiques de certaines chancelleries occidentales, qui souhaiteraient opposer à notre désir profond du respect de nos Lois et Institutions, un boulangisme politique antidémocratique et anti égalitariste, en éliminant l’effet stabilisateur de notre Etat et qui se trouve être l’Equilibre Régional. Et parce que nos réalités Africaines se doivent d’être préservées dans une mondialisation inique qui voudrait poursuivre les guerres coloniales, par toutes les tentatives de vassalisation aux moyens de l’Ingérence politique et des douleurs atroces issues des agressions d’une économie capitaliste, le séjour dans les eaux occidentales de notre Diaspora ne peut suffire à la transformer en crocodiles implantant sur notre sol des rebellions armées, pour tuer leurs propres frères qui et sœurs qui les auraient aidé à traverser les mers continentales. Ensemble nous avons choisi de bâtir l’avenir de notre Etat UN et INDIVISIBLE avec des plans sur durée déterminée en direction de nos jeunes, et en renforçant les Institutions morales et judiciaires afin de lutter efficacement contre la corruption et la cybercriminalité sous toutes leurs formes. Et pour effacer l’antagonisme fondamental qui pourrait perturber l’équilibre des intérêts particuliers entre l’Etat, les individus et les Régions de notre pays, une unité constitutive devant gérer la cohésion configurationnelle de nos institutions a vu le jour, et qui se trouve être le Conseil Constitutionnel, que nous ne devons pas juger à priori sur son état actuel, mais en fonction de l’avenir. Plus que se focaliser sur son fonctionnement actuel, notre pays et l’ensemble de nos concitoyens doivent orienter leur jugement sur les résultats futurs de cette Institution, lorsque l’expérience de la Décentralisation aura été menée à son terme et que les Camerounais de tous bords et de tous horizons auront compris le sens et la portée du ‘‘ Statut Spécial’’ attribué à nos deux régions du Nord et du Sud Ouest.

Par ailleurs avant de penser à apporter une solution immédiate à l’Autorité successorale de notre pays, il est important pour nous de limiter les prétentions de régence du monde par des groupes constitués. Cette lutte doit s’opérer plus à l’extérieur de nos frontières plus qu’à l’intérieur, et seulement contre des puissances concrétisant un état perpétuel de rapports de force, au demeurant conjoncturel, comme cette crise de sécession que notre pays vit depuis quelques années. Il est donc important de s’attarder sur l’attitude et le rôle de nos ambassadeurs à l’étranger, qui se doivent de vivre avec le Peuple camerounais tout entier la bataille de l’Emergence, tout en rappelant aux ressortissants de notre pays installés dans ces pays accréditaires, de se libérer de l’emprise des privilèges et des monopoles étrangers qui représentent des séquelles de conflits pour notre Unité. Certes il faudra les doter de larges prérogatives susceptibles de leur permettre d’exercer l’autorité dont les a investis notre Etat, mais ils doivent être aussi comptables devant la Justice Camerounaise et le Peuple Camerounais entier de leurs divers manquements à éviter ou à faire éviter des confrontations entre camerounais et leur Institution Suprême, ou entre camerounais et les autres noirs ayant perdu ou ne possédant plus la nationalité camerounaise sur des terres étrangères. En tant que Porte-parole de notre unité, donc constituante substitutive à notre Nation, ils ont un droit spécial à la parole pour réclamer et recouvrer nos richesses nationales spoliées, en commençant par nos intelligences de la Diaspora confisquées depuis lors au profit des puissances étrangères, alors que c’est l’Etat UNI du Cameroun qui les y aura envoyés. En ces temps dominés par des forces matérielles qui atteignent des proportions gigantesques, telles l’instrumentalisation supputée de la Science aux fins de réduction de la population mondiale, notre pays doit garantir plus que jamais son unité et son Emergence, son Indépendance et sa Dignité, à la seule et unique condition que nos bases économiques et politiques ne soient plus soumises à l’Etranger, fût-il d’origine camerounaise.

En vous souvenant des festivités antérieures, Chers frères et sœurs camerounais, n’oubliez pas que les chantiers de l’Innovation, de la Sécurité et de la Bio sûreté nous interpellent ensemble, come les autres chantiers d’ailleurs à entamer ou à achever. Notre pays accueillera certainement l’année prochaine l’Elite Sportive, il serait un pari gagné pour nous de leur offrir un visage radieux et reluisant d’une Afrique qui compte sur elle-même et en ses propres potentialités, pour guérir de ses propres blessures et parfois des plaies qu’elle-même n’aura jamais causées. Cela ne peut se réaliser que par des sacrifices que chacun et tous feront, pour donner une nature fraîche et fleurie aux engagements que nous avons pris de fait devant l’Histoire et le Futur, de préserver un héritage acquis par le sang de nos Pères Fondateurs, à demeurer solidaires de notre UNITE et conscients de sa richesse. Plus que des manifestations, le 20 Mai est pour chaque Camerounais un « évènement de cœur », qui sait faire la distinction objective entre aimer ce Cameroun pour ce qu’il est et représente, et s’affliger de ne pas le voir aimer comme il se devrait. Il nous appartient à nous aujourd’hui, de presser et de serrer en ce 20 Mai 2020 ce CAMEROUN contre notre cœur, siège de nos sensibilités morales et de passions nationales, conscients du regards attendri de nos enfants et petits enfants devant cet acte de l’Histoire, qui leur servira à coup sûr de Loi de la Vie pour un Etat UNI, FORT et PROSPERE ; car l’Amour du Cameroun triomphera de tout.

BONNE FÊTE de l’UNITE édition 2020 à tous les Camerounais!

****Narcisse ZIBI est Enseignant et Analyste sociopolitique, Diplômé de la Prestigieuse Ecole Normale Supérieure de Yaoundé, et Spécialisé dans la communication et le Marketing de l’Education.***
***Contacts : 667 097 423/ 695 71 39 98/ 674587313***
***Courriel : narcissezibi2018@gmail.com***

<https://lavoixducentre.cm/fete-de-lunite-2020-unite-de-la-nation-unite-des-coeurs-unite-de-tous>

1. **Cameroun – Les femmes du Mrc volent au secours des réfugiés du Noso à Yaoundé face à la Covid-19.**

Par

[**La Voix du Centre**](https://lavoixducentre.cm/author/lavoixducentre)

 -

29 mai 2020

***Grâce au projet « Survie- Cameroon Survival Initiative » (SCSI) lancé par le parti de Maurice Kamto, une forte délégation des amazones du Mouvement pour la Renaissance du Cameroun, conduite par sa présidente Awasum Mispa, a offert un kit sanitaire important aux déplacés du Noso installés dans la cité capitale, au motif de les protéger contre le Coronavirus.***

Le don constitué des gels hydroalcooliques, des masques de protection, des cartons de savon, des sacs de riz, des huiles végétales et bien d’autres denrées alimentaires de première nécessité, a été remis aux victimes des guerres dans le Noso, accueillies par des particuliers dans la ville aux sept collines.

En se rendant respectivement dans les quartiers Etoudi et Emana où résident actuellement ces personnes nécessiteuses, le groupe de femmes du Mouvement pour la Renaissance du Cameroun ( Mrc), a bien voulu soutenir les fugitifs des violences qui perdurent dans les régions anglophones du pays, aujourd’hui exposés à la pandémie Coronavirus.

En effet, le geste humanitaire des donatrices a suscité l’émotion chez les bénéficiaires.  » Nous remercions vivement le Mrc et le président Maurice Kamto d’avoir pensé à nous. Que Dieu bénisse les militants et leur leader », s’est exprimée une fillette de huit ans à Etoudi dans le domicile qui les accueille.
De son côté, le propriétaire d’une maison d’habitation à Emana qui héberge lui – aussi un groupe de victimes de la crise dans le Noso soutient que  » l’acte de générosité du Mrc est une mesure forte et indispensable qui vise à lutter efficacement contre le Coronavirus ».

Pour la présidente des femmes du Mrc Awasum Mispa, le projet  » Survie – Cameroon Survival Initiative ( SCSI ) supervisé par Christian Penda Ekoka, a pour but de soulager et de soutenir les populations dans le combat contre la Covid-19. Il permet d’impacter positivement les couches sociales en les accompagnant dans la prévention de ce fléau grave. C’est la raison pour laquelle nous leur apportons gratuitement des kits sanitaires ».

Au milieu de l’auditoire, Awasum Mispa a précisé les conditions d’utilisation des gels hydroalcooliques et des masques de protection. Elle a multiplié des cas pratiques tout en exhortant les heureux élus du jour à respecter les mesures d’hygiène, telles que prescrites par l’ Organisation Mondiale de la Santé ( OMS).

À la fin de son allocution, Awasum Mispa a réitéré  » l’intérêt et l’Amour que porte le président élu Maurice Kamto pour l’ensemble du peuple camerounais ». Dans le même sens, elle a rappelé l’opposition et la fermeté du Mrc quant au  » gré à gré » qui selon elle se prépare par le régime de Yaoundé, pour se maintenir à la tête de l’ État. Nous sommes prêts à poursuivre la bataille contre dictature du système actuel, a – t – elle laissé entendre.

**William Omer**

<https://lavoixducentre.cm/cameroun-les-femmes-du-mrc-volent-au-secours-des-refugies-du-noso-a-yaounde-face-a-la-covid-19>

1. **Plan présidentiel de reconstruction et de développement des Régions du NOSO – Campagne de sensibilisation sous fond de menaces des séparatistes**

Par

[**La Voix du Centre**](https://lavoixducentre.cm/author/lavoixducentre)

 -

24 juin 2020

***Le ministre Paul Tasong et ses collaborateurs entament, ce lundi 22 juin 2020 par Bamenda, chef-lieu du Nord-Ouest, une campagne de sensibilisation auprès des populations locales sous fond de menaces des séparatistes.***

Cela fait deux mois que Paul Tasong et ses collaborateurs ont été nommés par le Premier ministre, chef du gouvernement au poste de coordonnateur du Plan présidentiel de reconstruction et de développement des Régions du Nord-Ouest et du Sud-Ouest. Ces derniers ont entamé le lundi 22 juin 2020 par Bamenda, chef-lieu du Nord-Ouest, une campagne de sensibilisation auprès des populations locales. Selon des sources, les séparatistes qui font la guerre depuis quatre ans contre l’armée régulière pour l’indépendance des deux Régions anglophones ne l’entendent pas de cette oreille et ont entrepris de mettre en mal l’initiative. A cet effet, trois jours de ville morte depuis le lundi 22 juin 2020. Dans les faits, le premier jour de la semaine, est déclaré par les sécessionnistes « Lock down », une journée au cours de laquelle toutes les activités sont suspendues au Sud-Ouest et au Nord-Ouest.

*« Nous sommes fatigués de cette guerre qui ne profite à personne, mais qui va à l’encontre du bien des populations. L’état a déjà fait trop en tendant la main aux séparatistes à travers le comité de démobilisation et de réinsertion. Il n’est pas question pour l’état d’abandonner ses populations meurtris par une guerre qui a déjà assez duré. Nous continuons à lancer des appels en vue du dépôt des armes par ces dernier »,* lance un observateur.

Rappelons que le Plan présidentiel de reconstruction du Nord-Ouest et Sud-Ouest est l’une des recommandations du Grand dialogue national tenu à Yaoundé du 30 septembre au 4 octobre 2019, pour trouver des solutions à la crise socio-politique au pays. Si ce plan est une opportunité de ramener la paix dans ces régions, de nombreux observateurs évoquent des manquements dans la non prise en compte des protagonistes qui ont été absents à ce grand dialogue. C’est donc une mission assez délicate à laquelle Paul Tasong devra trouver une formule qui fait l’unanimité.
***Oscar Onolo***

<https://lavoixducentre.cm/plan-presidentiel-de-reconstruction-et-de-developpement-des-regions-du-noso-campagne-de-sensibilisation-sous-fond-de-menaces-des-separatistes>

1. **Diplomatie-La France surveille le Cameroun**

Par

[**La Voix du Centre**](https://lavoixducentre.cm/author/lavoixducentre)

 -

9 juillet 2020

**Si elle est quasiment satisfaite des mesures de sortie de crise que propose le pouvoir de Yaoundé, la France regarde d’un œil songeur la crise sécuritaire en zone anglophone.**

Au Quai d’Orsay, la carte du Cameroun est peinturlurée de rouge (région du Nord- Ouest) et d’orange (région du Sud-Ouest) depuis la présidentielle de 2018, qui a vu la victoire sans appel de Paul Biya. Ces deux régions sont formellement déconseillées aux ressortissants français « sauf raison impérative ». En mars dernier, la France a élargi le périmètre des zones à éviter après l’attaque de Galim, une bourgade de la région de l’Ouest, épargnée jusqu’ici par les exactions de l’irrédentisme anglophone. Désormais, la France déconseille à ses ressortissants de séjourner dans les localités de l’Ouest frontalières aux deux régions anglophones du Nord-Ouest et du Sud-Ouest (Noso). En plus, l’ambassade de France au Cameroun recommande aux mêmes ressortissants la plus grande vigilance dans les principales villes de l’Ouest.

Pour Jean-Yves le Drian, le ministre français des Affaires étrangères et de l’Europe, il faut éviter que la zone rouge gagne toute la région de l’Ouest en mettant rapidement un terme à cette crise, qui oppose Yaoundé à des groupes indépendantistes armés. Il le faisait encore savoir la semaine dernière aux parlementaires français par vidéoconférence. Une fois encore, le Drian a remis les propositions françaises sur la table : la solution politique qui passe par un dialogue franc entre les autorités de Yaoundé et les séparatistes et l’aide de la France pour reconstruire le Noso.

Pour l’instant, Yaoundé prend son temps. Le président camerounais Paul Biya a néanmoins préconisé la solution politique en organisant un grand dialogue national à Yaoundé, il y a un an. Sauf que les principaux leaders de la sécession anglophone ont boudé ce rendez-vous. Ils demandaient entre autres un dialogue dans un pays neutre encadré par un médiateur neutre ou même encore la libération de Sissuku Ayuk Tabe, l’un des principaux leaders de cette crise, condamné à perpétuité l’année dernière par un juge militaire. Jean-Yves le Drian continue toutefois de croire que la situation s’améliorer. C’est ce qui explique la nomination de Christophe Guilhou à Yaoundé.

Le diplomate français, diplômé de l’Institut d’études politique de Paris, connais bien le Cameroun. Dans une interview qu’il a accordé, en mois de mars au magazine Défis Actuels, Guilhou a indiqué qu’il suit le dossier « Cameroun » au Quai d’Orsay depuis plus de 25 ans. Il a en effet commencé au ministère des Affaires étrangères en 1992 comme rédacteur pour le Cameroun. En plus, quand ce Lillois (nord de la France) de 58 ans arrive au Cameroun en août 2019 en provenance de Djibouti, dans la corne de l’Afrique, c’est déjà un ambassadeur expérimenté passé par l’Organisation des nations unies (ONU), les cabinets de Michel Barnier ou de Philippe Douste-Blazy,deux anciens ministres des affaires étrangères… Une expérience dont a besoin la France au Cameroun en ce moment.

**Jean-Michel Bios**

<https://lavoixducentre.cm/diplomatie>

1. **Diplomatie – L’énigmatique Christophe Guilhou**

Par

[**La Voix du Centre**](https://lavoixducentre.cm/author/lavoixducentre)

 -

13 juillet 2020

**L’hyperactivité de l’ambassadeur français n’échappe à personne. De quoi se demander ce que cache ce dynamisme.**

« Les Bretons, c’est la mafia française ». Jean-Yves Le Drian, originaire de la Bretagne, a-t-il apprécié cette blague d’Emmanuel Macron devant le Saint-Père au Vatican ? Difficile à dire, mais une chose est sûre : elle a fait moucharder à gauche. Cette mauvaise blague n’a heureusement pas entamé la relation de confiance que le président français entretient avec son inamovible ministre des Affaires étrangères et de l’Europe. Ce dernier garde donc son rôle d’« éclaireur » attitré du locataire de l’Elysée sur le continent, où Paris a à cœur d’apaiser certaines tensions diplomatiques.

En mai 2019, quand il a fallu rétablir le climat de confiance entre Paris et N’Djamena, c’est bien Le Drian que Macron a dépêché auprès d’Idriss Déby Itno. Quand il a fallu relancer la coopération bilatérale entre la France et la RD Congo, qui se sont considérablement détériorées avec François Hollande, Le Drian a pris l’avion pour Kinshasa où l’attendait Félix Tshisekedi, fraîchement élu président. En octobre dernier, Jean-Yves Le Drian a fait le déplacement pour Yaoundé. Le Breton a été reçu en audience par Paul Biya, qui était pourtant attendu à Sotchi où se tenait le tout premier sommet Russie-Afrique.

Pendant cet entretien, les deux hommes ont discuté de la nécessité de trouver une solution pérenne à la crise sécuritaire dans les deux régions anglophones du Nord-Ouest et du Sud-Ouest (Noso). Mais aussi de développement et d’intérêts économiques. En clair, Paris souhaite impulser une nouvelle dynamique dans les relations entre Yaoundé et Paris. Avant cette rencontre, la diplomatie française était davantage préoccupée par la lutte contre le terrorisme dans la région de l’Extrême-Nord, où les soldats camerounais combattent les soudards de la secte islamique de Boko Haram depuis pratiquement 2014. C’est pour cette raison que le Quai d’Orsay avait affecté Gilles Thibault à Yaoundé.

**L’irrédentisme anglophone**

Le diplomate français présente ses lettres de créance au président Paul Biya en septembre 2016. Cet ancien colonel de l’armée française a fait ses classes à l’école militaire de Saint Cyr par laquelle plusieurs têtes couronnées des forces de défense du Cameroun sont passés. « Il a même été le camarade de quelques-uns », commente un diplomate en poste à Yaoundé.

Ce dernier nous apprend qu’une fois installé, Gilles Thibault s’est évertué à apporter l’aide de la France au pic de cette guerre que le Cameroun mène contre Boko Haram.

Si le Cameroun n’a pas encore complètement annihilé la capacité de nuisance des hommes d’Abubakar Shekau, Yaoundé peut néanmoins se vanter d’avoir contribué à repousser Boko Haram dans un mouchoir de poche dans les abords du Lac Tchad. Pour la France en tout cas, la roue a tourné : Paris se préoccupe désormais de la recrudescence de la violence dans le Noso, où le gouvernement est radicalement opposé à la montée de l’irrédentiste anglophone. Depuis le début, la France prône la paix et la tenue d’un dialogue franc et sincère entre les deux parties. Quoi de plus normal que d’envoyer un homme de paix comme ambassadeur à Yaoundé.

Jean-Yves Le Drian, qui suit de près l’évolution de la crise dans le Noso, a adoubé la nomination de Christophe Guilhou. Ce natif de Lille, dans la région Pas-de-Calais (nord de la France), qui a succédé à Gilles Thibault à la tête de l’ambassade de France au Cameroun en août 2019, a effectivement une expérience de haut niveau en matière de paix. Entre 2013 et 2015, il a occupé le poste de directeur de la paix, de la démocratie et des droits de l’homme à l’Organisation internationale de la Francophonie (OIF). « La France a pendant longtemps été préoccupée par la guerre contre les terroristes de Boko Haram, maintenant c’est la crise dans les régions anglophones qui l’intéresse », indique notre source diplomatique.

**Homme de jonction**

Mais ce passé à l’OIF ne suffit pas, à lui tout seul, à expliquer pourquoi le nom de Christophe Guilhou est sorti du chapeau, presque à l’unanimité. Ce diplomate de 58 ans avait aussi l’avantage d’avoir été rédacteur sur le Cameroun dès 1992, alors qu’il entamait sa carrière de diplomate. C’est donc un fin connaisseur du Cameroun, ce que Paris voulait en ce moment où ses intérêts économiques sont mis en mal par l’avancée de l’ogre chinois. Les échanges entre le Cameroun et son partenaire chinois sont constante augmentation. L’empire du Milieu est le premier client du Cameroun (plus de 24 % des exportations) de loin devant la France (6,3 %). De même, la Chine est le premier importateur du leader de la sous-région (environ 19 % des importations).

En tout cas, pour Paris, l’heure est venue de préserver ses intérêts économiques, surtout depuis que certaines entreprises françaises ont commencé à perdre du terrain : Bolloré a perdu sa concession au port de Douala, Rougier a quitté le pays et Michelin menace de faire de même. « Christophe Guilhou est un homme de jonction entre ce qui s’est fait avant et ce qui se fera après, c’est-à-dire les batailles économiques entre puissances. La France ne veut pas perdre la main », fait savoir notre source diplomatique.

La grande activité des entreprises françaises ne tombe donc pas des nues. On se souvient que certaines d’entre elles avaient intrigué en remettant des kits contre le Covid, alors même que le patronat réfléchissait à une action coordonnée. Ce qui n’a rein d’étonnant. Alors qu’il achevait sa visite au Cameroun, en octobre dernier, quelques allusions de Jean-Yves Le Drian montraient bien que Paris souhaite désormais que les entreprises françaises jouer les premiers rôles. Message bien reçu chez Société anonyme des brasseries du Cameroun (SABC), la plus grande multinationale hexagonale au Cameroun avec un chiffre d’affaires de 650 millions de francs CFA. Son directeur général, Emmanuel de Tailly, est de plus en plus visible.

**Michel Nga Atangana**

<https://lavoixducentre.cm/diplomatie-lenigmatique-christophe-guilhou>

1. **Nominations – Maurice Kamto fait son remaniement**

Par

[**La Voix du Centre**](https://lavoixducentre.cm/author/lavoixducentre)

 -

8 septembre 2020

**Le président national du MRC nourrit l’ambition de mobiliser ses troupes pour les prochaines batailles politiques du parti. Son nouveau « gouvernement » est censé apporter un vent nouveau.**

Le président du Mouvement pour la renaissance du Cameroun (MRC) vient d’insuffler un nouveau souffle au sein de sa formation politique en procédant au réaménagement de son équipe. Olivier Bibou Nissack, porte-parole de Maurice Kamto, se voit doter d’une autre casquette : celle de conseiller en charge des questions liées au panafricanisme. Sosthène Médar Lipot, très prolixe dans les médias, perd sa position de secrétaire national chargé de la communication au profit de Joseph Emmanuel Ateba. Célestin Djamen, militant controversé du MRC, maintient sa place de secrétaire national chargé des droits de l’Homme et de la gouvernance.

Plusieurs autres figures font leur entrée dans la vague des promus du parti. Flore Mboussi, Wilfried Ekanga, Armand Ntoufack, Apollinaire Oko et bien d’autres militants qui occupent désormais des postes de responsabilité. Ils ont bénéficié de la confiance de Maurice Kamto. Qui on le sait, préparait ces nominations depuis plusieurs mois déjà. Il consultait certains de ses proches et même des visiteurs de minuit dans sa résidence de Santa Barbara à Yaoundé. Dans le parti, on annonçait des surprises et il y en a eu. Mais ce qui intrigue encore plus, c’est que ces promotions ressemblent point pour point à un gouvernement de l’ombre, comme il est de coutume dans la culture politique anglosaxon. Le Social Democratic Front (SDF) de John Fru Ndi, qui a jouit pendant de longues années du statut enviable de parti leader de l’opposition a toujours constitué ce gouvernement de l’ombre.

Pour Aimé Bounoung, chercheur en sciences politiques à l’université de Yaoundé II, ces nominations laissent penser à un gouvernement destiné à susciter un challenge face au régime de Paul Biya, en place depuis 37 ans déjà. « Les nouvelles nominations au sein du MRC s’inspirent d’une sociologie des mutations des rôles. La perte de confiance observée chez certains responsables du Mrc a contribué à une nouvelle distribution des cartes opérée par Maurice Kamto pour susciter la sympathie de ses militants », explique le chercheur.

Pour l’opinion, l’actuel positionnement des cadres du principal parti de l’opposition camerounaise correspondrait à la vision de Maurice Kamto d’organiser « une manifestation pacifique » en vue d’empêcher la tenue des élections régionales dont les couleurs ont été annoncées par Paul Biya dans un récent décret qui décide de la répartition des élus régionaux dans les dix régions du Cameroun. Tout ce que conteste le MRC, qui prévoit le boycott de cette échéance en réclamant du gouvernement la résolution de la crise dans les régions anglophones de Nord-Ouest et Sud-Ouest (Noso) et la libération des prisonniers qu’ils considèrent comme étant « des victimes du régime ».

Maurice Kamto exhorte les populations à « défendre leurs droits et leurs libertés » en se joignant à la marche pacifique que son parti entend organiser. « Trop c’est trop. Nous avons assez souffert de ce régime des personnes qui n’ont aucun souci pour l’avenir du Cameroun et de ses populations », s’indigne Maurice Kamto. Mais pour Aimé Bounoung « il y a très peu de chance pour le MRC d’être accompagné par les populations dans cette démarche. Ce parti souffre d’un attribut social négatif et par conséquent ne saurait être suivi par les masses ». Contacté par notre rédaction pour décrypter ces mutations au sein du MRC, notre requête est restée lettre morte.

**William Omer Tchuisseu**

<https://lavoixducentre.cm/nominations-maurice-kamto-fait-son-remaniement>

[
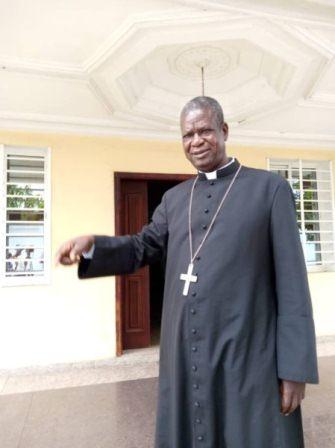
](https://lavoixducentre.cm/wp-content/uploads/2020/09/kl%C3%A9da.jpg)

- [A LA UNE](https://lavoixducentre.cm/category/a-la-une)
- [Actualités](https://lavoixducentre.cm/category/actu)
- [Société](https://lavoixducentre.cm/category/actu/societe)

1. **Monseigneur Samuel Kléda- Le prélat qui ne mâche pas ses mots**

Par

[**La Voix du Centre**](https://lavoixducentre.cm/author/lavoixducentre)

 -

21 septembre 2020

**L’archevêque métropolitain de Douala a exprimé cette semaine son ras-le-bol face à la volonté du régime actuel de contraindre les fonctionnaires à militer au sein du parti au pouvoir.**

Au moment où le Cameroun traverse une zone de turbulence marquée par les crises sécuritaires dans la région septentrionale et dans la partie anglophone du pays, le président de la conférence épiscopale nationale des évêques du Cameroun comme à l’accoutumée, est sorti de sa réserve pour exprimer son indignation face à l’injustice qui a fait son lit au Cameroun. Monseigneur (Mgr) Samuel Kléda, l’archevêque métropolitain de Douala  appelle l’Etat du Cameroun à respecter les libertés individuelles de ses fonctionnaires. Pour l’homme de Dieu, il est inimaginable qu’un poste soit considéré comme une monnaie d’échange contre l’appartenance au parti au pouvoir. Monseigneur Kléda constate aussi avec amertume que les postes sont taillés sur mesure pour les membres du Rassemblement démocratique du Peuple camerounais (Rdpc). « On ne doit obliger personne à faire partie d’un parti politique. En aucun cas cela ne doit exister. Or, nous le savons, ici au Cameroun, tu es fonctionnaire, tu es obligé de soutenir le parti au pouvoir. Cela n’est pas acceptable. », s’est offusqué l’archevêque lors d’une sortie médiatique cette semaine.

Ce clerc n’a jamais eu sa langue dans la poche. Ce n’est donc pas la première fois qu’il monte au créneau pour dénoncer les dérives du régime en place. Il a pris la parole de nombreuses fois pour appeler le pouvoir de Yaoundé à engager un dialogue franc avec les groupes sécessionnistes pour le retour de la paix dans les régions anglophones du pays. L’on se souvient qu’il était l’initiateur d’un consortium des fils et filles des régions en crise à l’effet de trouver une solution durable à la situation délétère qui prévaut dans cette partie du pays. Mais cette initiative n’avait pas eu l’onction de l’Etat et avait fait long feu.

En 2017, après l’assassinat de l’évêque de Bafia, Jean-Marie Benoît Bala, le président de la conférence épiscopale avait demandé que toute la lumière soit faite sur ce énième crime commis contre les membres du clergé camerounais. « Voilà un meurtre de plus, un meurtre de trop », avait affirmé l’épiscopat conduit par Mgr Kléda. La conférence des évêques du Cameroun avait par ailleurs relevé que les membres du clergé étaient ainsi victimes d’assassinats depuis les années 1980. Et d’ailleurs, la position de la conférence épiscopale des évêques nationale du Cameroun est sans équivoque. Mgr Jean-Marie Benoit Bala avait été assassiné. « C’est clair qu’il a été assassiné. Jusqu’à présent je dois dire que nous avons accueilli son corps et le constat n’est pas celui d’une personne  qui s’est noyée comme on a voulu nous faire comprendre », avait déclaré l’archevêque au cours d’une conférence de presse. Il s’inscrivait ainsi en faux contre la thèse de la noyade avancée par le gouvernement. D’ailleurs, les causes et les circonstances de la mort de l’évêque sont restées floues. L’enquête ouverte par les autorités n’avait pas pu faire taire les soupçons. Mgr Samuel Kléda est un habitué des médias qui n’hésite pas à inviter la presse pour donner son point de vue sur la vie de la nation ou ses propositions sur la marche du pays vers l’émergence souhaitée.

**Luigina Monok**

<https://lavoixducentre.cm/monseigneur-samuel-kleda-le-prelat-qui-ne-mache-pas-ses-mots>

1. **Tuerie de Kumba- Calibri Calibro crie sa colère**

Par

[**La Voix du Centre**](https://lavoixducentre.cm/author/lavoixducentre)

 -

4 novembre 2020

L’activiste camerounais Abdoulaye Tchiam allias Calibri Calibro s’est exprimé sur les faits qui font l’actualité au Cameroun en ce moment, du massacre de Kumba, aux régionales en passant par la question de la double nationalité etc

« On ne touche pas les enfant, ils sont sacrés ». Le massacre des élèves de Mother Franscisca International Bilingual Academy à Kumba dans la région du Sud-Ouest, département de la Mémé le 24 octobre dernier a plongé Calibri Calibro dans une colère noire.  Au cours d’un entretien qu’il a accordé à la Voix du Centre cette semaine, l’activiste camerounais a martelé avec force et sans détour ce crime de trop,  crime de guerre, crime contre l’humanité perpétré contre les populations civiles qui ne demandent qu’à vivre dans la paix. Le président de la Brigade anti-sardinards (Bas) a le cœur qui saigne à tel point qu’il en vient à s’interroger sur l’humanisme des dirigeants camerounais : « Est-ce que nos dirigeants ont des cœurs, ou sont-ils des démons comme on le dit ? La cruauté de Kumba dépasse celle de Bamenda (Ngarbuh Ndlr). Il faut que cette guerre fratricide s’arrête.».

L’assignation à résidence surveillée du président du Mouvement pour la Renaissance du Cameroun (Mrc) est suivie de très près par ce défenseur de la première heure des droits de l’Homme. L’on se souvient que Maurice Kamto n’est plus libre de ses mouvements depuis le 22 septembre 2020, date prévue pour manifester contre la tenue des élections régionales du six décembre prochain dans un contexte de crise sécuritaire dans le Nord-Ouest et le Sud-Ouest. Les forces de l’ordre et de défense avaient pris d’assaut son domicile pour empêcher l’homme politique de quitter sa résidence ce jour-là, peu avant six heures du matin. S’en étaient suivies alors des arrestations arbitraires à travers le pays. Tous les rassemblements étaient systématiquement dispersés. Les Ong (Organisation non gouvernementales dénombre à ce jour, plus 589 détentions abusives. D’aucuns se sont empressés de qualifier ces marches de flop tout en faisant fi des intimidations dont ont été victimes les partisans du Mrc et du  succès que ces marches auraient pu avoir n’eut été ces manœuvres anti-démocratiques. Et pour ce Camerounais réfugié en France, ces agissements du régime à l’encontre de Kamto ont contribué à faire en sorte que le Cameroun fasse un bon arrière. Car cette situation rappelle les tristes années de dictature. Notre interlocuteur s’inscrit en faux contre ceux qui le tancent d’être à la tête d’un groupe à la solde du Mrc ou d’être une entité du principal parti d’opposition. « Je ne soutiens pas l’homme Kamto, mais son programme. », lance-t-il, tout en insistant sur le fait qu’il n’hésitera pas à prendre ses distances vis-à-vis de la formation politique si jamais le professeur Kamto accède au pouvoir cesse de servir la patrie. Pour Calibri Calibro, le leader du Mrc est bel et bien le candidat choisi par les Camerounais au terme du scrutin présidentiel d’octobre 2018. A en croire l’activiste : « Depuis l’avènement du multipartisme, le régime dictatorial de Biya n’a jamais gagné une élection. Le président Maurice Kamto ne se fait pas appelé président élu, il est bel et bien le président élu. Il y a une différence entre la légitimité et la légalité. Maurice Kamto a la légitimité parce qu’il a remporté les élections, Paul Biya à la légalité car, il a bénéficié du soutien de ses amis (communauté internationale, Ndlr).». Il n’hésite pas à qualifier cette assignation à résidence de « situation d’ubuesque sans aucun fondement juridique ».

« **Vous avez un gouvernement qui est frileux**»

Pour Calibri Calibro, l’assignation à résidence surveillée de Kamto est la preuve que ce leader politique fait peur au régime. « Ce responsable politique a l’étoffe qu’il faut pour challenger le régime, et malheureusement nos sommes en dictature. Et le régime dictatorial de Paul Biya montre une fois de plus que le Cameroun est une République bananière.», déclare-t-il courroucé, avant d’ajouter « Le Cameroun est le champion de la dictature. ». Celui grâce à qui l’enquête a été ouverte à la suite du carnage de Ngarbuh en interpellant Macron sur la situation délétère au Cameroun, continue de multiplier les actes de bravoure. Le dernier en date  c’est l’interruption d’une messe en l’honneur de Célestine Kétcha Courtès, ministre de l’Habitat et du Développement urbain à Paris. Celle-ci avait été victime d’un accident dans la région septentrionale lors d’une mission interministérielle. L’on se souvient qu’au salon de l’agriculture, à la suite de cette interpellation, Macron avait promis de « mettre la pression sur Biya » pour que toute la lumière soit faite sur cette affaire. Les responsabilités avaient enfin été établies et les coupables identifiés.

Pour Abdoulaye Tchiam, les Camerounais sont si exaspérés par la mauvaise gestion de la chose publique et par tant de guerres et d’injustices que désormais ils ont pris conscience qu’il faut le changement. « Les choses ne seront plus jamais comme avant. Vous avez vu cette femme qui a transcendé la peur et qui a interrompu le tout puissant ministre de l’Administration territoriale à Bamenda en lui disant objection ? ». D’ailleurs, Calibri pense même que cette mouvance ira encore plus loin : « Je peux vous assurer que dans un proche avenir, la soupape va sauter et les Camerounais auront enfin ce changement définitif.». « Vous demandez si désormais les choses ne se passeront plus jamais comme avant ? Rectificatif, les choses ne se passent plus comme avant. ». Il en veut pour preuve, l’arrêt des déplacements du chef de l’Etat à Genève en Suisse. Cela fait un an que le président n’y a pas mis les pieds, selon l’activiste. La troisième République est en marche au Cameroun car, les Camerounais ne se laisseront plus jamais dupés et muselés comme ce fut le cas avant, pense-t-il. Quant aux, élections régionales du 06 décembre prochain, pour lui,  c’est une roublardise, le débat sur la double nationalité est un faux débat. Ce dernier invite l’Etat à négocier avec les groupes séparatistes anglophones afin de trouver une voie de sortie de crise. « Quand il faut négocier avec Boko-Haram pour libérer un occidental c’est normal, mais quand il faut faire la même chose avec les sécessionnistes, certains disent que l’on ne négocie pas avec terroristes », s’offusque-t-il.

**Albertine Essomba**

<https://lavoixducentre.cm/tuerie-de-kumba-calibri-calibro-crie-sa-colere>

1. **Désertion dans les rangs – 226 soldats décampent**

Par

[**La Voix du Centre**](https://lavoixducentre.cm/author/lavoixducentre)

 -

14 décembre 2020

**Le nombre sans cesse croissant des militaires morts au front dans les régions anglophones serait le motif d’un ras- le- bol  manifesté par leur fuite de l’armée.**

La frustration et l’inconfiance au sujet d’une guerre sans espoir du moindre achèvement auraient  poussé un groupe d’hommes en tenue à prendre la poudre d’escampette. Dans la liste des déserteurs les éléments du corps des sapeurs-pompiers, les gendarmes et militaires outrés par les tueries quasi quotidiennes de leurs camarades dans les feux de cette guerre qui paralyse  les localités du Nord-ouest et du Sud-Ouest  depuis bientôt cinq ans sont introuvables. À l’honneur et fidélité ils ont opté pour le libre arbitre en désertant du service militaire. Portés disparus de tous les radars leurs noms circulent au sein du haut commandement.

**Les signes d’un malaise profond**

Même si la grande muette sert d’apologie du silence et de la réserve ses secrets bien que masqués par les étouffements débordent ses usages et exposent à la fin le vrai visage des tensions  en interne. La désertion des 226 éléments témoignent visiblement du mauvais vent qui souffle dans l’armée.  Les morts en masse des militaires au front dans le Noso, les handicapes  graves subis par les soldats mitraillés, les actions militaires prolongées au champ de bataille et la dépression observée chez les uns et les autres auraient sans doute inspiré ces hommes en tenue à jeter les armes et les camouflets. Il n’est non plus exagéré de faire mention des traitements peu humains que subissent les soldats de rang dans la répartition de leurs droits. En l’occurrence leurs primes de guerre font l’objet de la hantise de la hiérarchie militaire au moment de la donation. Si ces soldats ne perçoivent pas leurs droits en monnaie de singe ils font  face à une interminable attente de ces sommes auxquelles le bénéfice dépend de l’humeur d’un chef le plus souvent exigeant la part du lion or les soldats de rang sont en avant-poste de la guerre. Le tribalisme n’épargne pas les forces de défense. Les considérations ethno  tribales s’emparent des rangs et tendent à propager la marginalisation entre les éléments coptés à leur tour par des supérieures originaires des différentes régions et qui montrent la préférence d’un tel combattant à un autre non pas pour les prouesses militaires mais plutôt qu’il appartiendrait à une tribu quelconque.

**Les risques d’une désertion en masse**

Leur abandon du service militaire interpelle le politique à une gestion plus efficace de la crise en zone anglophone. Les dangers d’une désertion des autres frères d’armes ne doivent être minimisés. Toutefois le prolongement de la guerre et l’absence du dialogue entre les belligérants vont sans doute multiplier les victimes militaires de cette guerre qu’Achille Mbembé qualifie de « guerre inutile». Au-delà de la désertion la réalité traduit l’échec du gouvernement dans les démarches visant à résoudre la crise dans le Noso. La sensibilité a tout son sens dans un cadre où l’on entretient une guerre fratricide en essayant de commissionner les militaires contre leurs compatriotes. En plus les  manœuvres de la bourgeoisie militaire sapent le moral des soldats et incitent parfois au non-respect de l’autorité conséquence des meurtres perpétrés par les subalternes contre des chefs militaires véreux. «  On ne vous dit pas la vérité. Les réalités sur le terrain dans les régions du Nord- Ouest et Sud- Ouest sont atroces. Nous souffrons au combat. Nous mourons au combat. J’ai perdu plusieurs de mes camarades de promotion. Pour venir à Yaoundé passé deux ou trois jours je suis obligé de commissionner une fille pour qu’elle envoie mes équipements à l’agence parce que au moindre soupçon les ambazoniens nous tuent. C’est nous qui mourons au combat. Et le plus grave,  nos chefs nous torturent. Nous avons plusieurs primes lorsqu’on est en guerre. Mais nous sommes maltraités pour avoir cela et le plus souvent nous n’avons même pas cet argent qui nous revient de droit ». Déplore un jeune soldat de retour à Bamenda pour un bref séjour dans une ville du pays. A cet imbroglio s’ajoutent les cas des soldats indisciplinés  pour qui le respect de la hiérarchie n’a plus de valeur. Mais aussi la méfiance entre camarades  a fait son nid dans les troupes. Entre poursuivre une «  guerre inutile » et s’enfuir loin du commandement les compagnons perdent l’honneur de se confier les autres aux autres au risque de se heurter aux intentions voilées. « On ne sait plus qui est qui. Tu peux te confier à un camarade espion. Nous vivons la guerre du plus profond de nos âmes, loin de nos familles, loin de tout ». Renchérit cet adjudant d’un groupe d’élite. En quatre ans  la guerre  dans les régions du Nord- Ouest et du Sud-Ouest a fait plus de 5000 victimes civiles et militaires et environ 7000 déplacés**.**

**William Omer Tchuisseu**

<https://lavoixducentre.cm/desertion-dans-les-rangs-226-soldats-decampent>

1. **2020 au Cameroun – Bilan d’une année noire**

Par

[**La Voix du Centre**](https://lavoixducentre.cm/author/lavoixducentre)

 -

22 décembre 2020

Le pays de Paul Biya n’a cessé de compter les morts en cascade dans les régions anglophones de même qu’il enregistre de mauvais points au plan politique visible par le musèlement de l’opposition.

Au terme de cette année 2020 marquée par l’échec du gouvernement observé sous plusieurs aspects de la vie politique nationale les réalités sans doute mélancoliques démontrent les insuffisances des autorités face à la gouvernance. Le tableau des manquements indiquerait l’alerte rouge.

**Un bilan sécuritaire effroyable**

L’émoi de la communauté nationale et internationale dans la gestion de la crise qui secoue le Nord- Ouest et le Sud-Ouest depuis quatre ans a  fait couler beaucoup d’encres et de salives. Dans la chronologie des lamentations le massacre de Ngarbuh perpétré par l’armée camerounaise dans cette localité de Kumba le 14 février dernier est devenu un symbole de la barbarie militaire sur les populations. L’écho de cet assassinat de 23 civils innocents a finalement contraint le gouvernement a validé l’hypothèse d’une tuerie militaire niée par les autorités aux premières heures du crime.  Dans la même liste des meurtres commis par les hommes en tenue le rappel des sept écoliers dont l’âge varie entre 9 et 12 ans  tombés sous les canons  des militaires le 24 octobre dernier fait grossir le registre des horreurs initiées par les soldats camerounais dans les régions dévastées par les violences. Les illustrations pareilles ne sont pas exhaustives. Elles témoignent des pleurs et des larmes des familles grandes perdantes de la razzia  des commandos sur le terrain. La situation dans ces zones fait perdre à l’ État le contrôle de ces localités où règnent en maîtres les sécessionnistes armés de même qu’elle expose les habitants sans défense au centre d’une mort causée par les ambazoniens et les soldats. Cependant cet état d’insécurité s’est prolongé dans les autres villes du pays. À Yaoundé  l’on chiffre pour cette année 2020 qui s’achève quatre cas d’explosion à la bombe artisanale ayant fait plus d’une vingtaine de blessés graves. Pareillement les exilés internes surabondent Douala, Nkongsamba, Bafoussam, Yaoundé et bien d’autres agglomérations où les maisons d’accueil sont surpeuplées des fugitifs de la guerre également éparpillés au Nigeria.

**Une année caractérisée par l’enchaînement de l’opposition**

Le chapitre de la privation des libertés individuelles et du musèlement de l’opposition  pourrait inspirer les témoins de la confiscation du pouvoir par le régime de Yaoundé. Les marches pacifiques organisées par le mouvement pour la renaissance du Cameroun ( Mrc) principal parti de l’opposition camerounaise ont malheureusement conduit les manifestants pacifiques derrière les barreaux. Les récentes  dates du 22 septembre et du 06 octobre dernier grand moment prévu pour les « marches blanches » ont connu une invasion des forces de police et de gendarmerie bourreaux des participants à la manifestation pacifique et des journalistes reporters eux – aussi victimes des violations des forces du maintien de l’ordre. Une situation qui inclut à la suite des obstacles contre l’opposition la privation de la liberté de la presse. L’assignation a résidence surveillée le 20 septembre dernier de Maurice Kamto principal opposant  de Paul Biya confirme la volonté des dirigeants à garder la mainmise sur le pouvoir qu’ils détiennent depuis 38 ans. Ils sont près d’un millier de citoyens incarcérés dans les prisons pour la simple raison d’avoir participé à une marche pacifique. Leur emprisonnement fait l’objet des interventions régulières de la société civile et des défenseurs des droits de l’Homme et des libertés.

William Omer Tchuisseu

<https://lavoixducentre.cm/2020-au-cameroun-bilan-dune-annee-noire>

1. **Diplomatie – « Joe Biden doit bel et bien s’intéresser au cas du Cameroun »**

Par

[**La Voix du Centre**](https://lavoixducentre.cm/author/lavoixducentre)

 -

26 janvier 2021

**Au lendemain de la prise de fonction par la nouvelle administration américaine Thomas d’Aquin Simbé Avoré politologue analyse l’intérêt pour Joe Biden le nouveau locataire de la maison blanche à s’intéresser à la guerre dans le Noso.**

Distant, désintéressé, belliqueux lorsqu’il a fallu évoquer les problèmes du continent I’ ancien président américain Donald Trump s’est éloigné de l’Afrique durant ses 4 années de pouvoir. Mais dès sa pénétration à la maison blanche le nouveau patron du bureau ovale donne des signes sur le renouvellement de la politique américaine à mener en Afrique. Autrement dit il va agir sur la situation sécuritaire dans les régions anglophones du pays. D’ailleurs les opposants du régime Biya et des Ong ont daigné un retour favorable aux appels multiples lancés à l’ancien gouvernement américain.

En vain. Dans les méandres de la géopolitique actuelle entre les deux États «  il est pratiquement impensable que le nouveau président des États-Unis ne puisse pas inscrire une question aussi importante que celle- là dans son agenda politique. Joe Biden doit bel et bien s’intéresser au cas du Cameroun puisque l’un des axes de sa politique africaine repose sur la sécurité ». À la première analyse de Thomas d’Aquin Simbé Avoré chercheur en sciences politiques de l’université de Douala et enseignant de communication, le profane en la matière pourrait imaginer un débarquement des troupes étrangères sur le sol camerounais, bien que l’illustration de la présence militaire américaine en Extrême- Orient fasse montre d’une intervention de Washington par la force dans diverses régions du monde. Dans le contexte particulier du Cameroun l’on est loin d’épiloguer sur un scénario pareil. La motivation des proches de Joe Biden sur une action à poser renforce l’idée selon laquelle les États- Unis ont le regard tourné vers le pays de Paul Biya.

Le magistère étoffe son analyse par « Anthony Blinken qui assurera le poste de chef de la diplomatie américaine dans l’équipe conduite par Joe Biden, s’est explicitement exprimé devant le sénat américain sur son vœu de voir les États- unis s’impliquer dans la résolution de la crise qui sévit depuis 2016 au Cameroun”. Toutefois l’intervention américaine au Cameroun a tout l’air de se limiter uniquement au niveau diplomatique donc excluant toute idée d’une action par les armes. Pour deux raisons tout au moins. ».Le mandat qu’amorce Joe Biden est qualifié par lui-même de mandat de respect. À partir de là il faudrait évacuer toute hypothèse d’ une vassalisation par la présence des forces onusiennes sur son sol puisque le Cameroun est un État souverain qui dispose d’une armée républicaine et bien former pour parer à toute agression émanant des groupes armés rebelles. Ensuite la guerre dans le Nord-Ouest et dans le Sud-Ouest est en pleine extinction.

Il n’est donc plus nécessaire de faire appel aux casques bleus des Nations unies. Si le nouveau président des États-Unis doit exercer une quelconque pression sur le Cameroun, elle doit se faire dans le sens de l’organisation d’un dialogue véritablement inclusif”. Conclut- il.

**William Omer Tchuisseu**

<https://lavoixducentre.cm/diplomatie-joe-biden-doit-bel-et-bien-sinteresser-au-cas-du-cameroun>

1. **Afan-yo’o et Nkozoa Des écoles témoins bilingue en gestation**

Par

[**La Voix du Centre**](https://lavoixducentre.cm/author/lavoixducentre)

2 février 2021

**Le ministre de l’éducation de base Laurent Serge Etoundi Ngoa a procédé les 28 et 29 janvier dernier a une double cérémonie de pose de première pierre respectivement à Afan-yo’o et Nkozoa.**

Sous instruction du Président de la République Paul Biya, par ailleurs initiateur du projet de construction de ces écoles publiques bilingue témoins, le ministre de l’éducation de base(Minedub), Laurent Serge Etoundi Ngoa accompagné du gouverneur de la région du centre Naseri Paul Bea et autres autorités administratives et politiques  a procédé et ceux durant deux jours à la cérémonie de la pose de la première pierre des bâtiments devant abriter ces édifices futuristes de formation de la pensée et du savoir. Ces écoles modernes sont construites dans des zones d’éducation prioritaires c’est-à-dire des zones où l’arrivée de ces infrastructures a été tardive.

De ce fait, le 28 janvier dernier, le Minedub a débuté son périple à Afan-yo’o, localité située dans l’arrondissement de Yaoundé 3. Dans cette partie, plus d’un hectare de terrain a été réquisitionné par l’Etat afin que sorte de terre une école maternelle et primaire bilingue. De façon concrète, l’édifice complet comprendra un bâtiment administratif, une salle polyvalente, des salles de classe, un bâtiment pédagogique, deux logements directeurs, un logement pour enseignant, une cantine, une clôture et des aires de jeu pour enfants (terrain de football, basketball, tennis…). Cette initiative a été salué à sa juste valeur par le chef de 3e degré d’Afan-yo’o, Faustin Olomo, « Monsieur le ministre par cet acte vous signer l’acte de naissance de la nouvelle version de l’école publique d’Afan-yo’o qui va intégrer les deux sous-systèmes anglophones et francophones. Les parents sont très fiers de savoir que dans un avenir très proche, leurs enfants seront capables de s’exprimer aisément en anglais et en français. Le bilinguisme ainsi prôné par le chef de l’Etat, creuset de l’intégration de l’unité nationale et du vivre-ensemble trouve ici son implémentation. A la suite de la création de cette école publique témoin, nous vous remercions d’y avoir annexé une école maternelle publique opérationnelle depuis 2019 dans un site et un local offert gratuitement par une élite. Notre souhait est qu’elle puisse bénéficier des mêmes équipements de l’école publique témoin. »

Dans son allocution de circonstance, le maire de la commune d’arrondissement de Yaoundé 3, Lucas Owona à demander aux populations de faire bonne usage de cette école témoin, qui ne représente rien d’autre que le devenir des enfants. Pour lui, malgré les crises sanitaires et sécuritaires donc fait fasse le pays actuellement, le Président de la République continue d’accorder une place de choix à l’éducation en lui dotant des moyens conséquents. Il a terminé en émettant le vœu de voir certaines écoles de sa commune être relooker, parce que frapper par la vétusté des bâtiments.

C’est sur une période de trois mois que va s’étendre les travaux de construction de ces écoles  primaires, maternelles et lycée bilingue témoins, sous financement relevant su budget d’investissement publics(Bip) 2020. « La conception des écoles témoins donc le lancement de la construction des quatre premières se tient à Afan-yo’o est liée au fait que le Président de la République a vu l’état des écoles qui étaient projeter à la télévision, et il a posé la question de savoir si les écoles japonaise qui font la notoriété aujourd’hui sont les seules qui puissent le faire ? Est-ce que ce n’est pas des camerounais qui ont construit ces écoles ? Il a donc souhaité que nous ayons désormais un type d’école similaire que nous allons construire dans toutes les régions du pays .Le spécimen qui vos ait présenté montre l’ambition du Président de la République de doter sa jeunesse d’infrastructures fonctionnelles, modernes et fiables en durabilité. Avec cela, l’environnement pédagogique au sein de ces écoles permettra aux élèves d’être performants pour bâtir un pays prospère avec des citoyens bien formés. Mon souhait est que dans un futur proche, nous puisons nous réunir ici pour inaugurer ce joyau qui prendra corps d’ici quelques semaines. », Indique Laurent Serge Etoundi Ngoa, Minedub.

**Un lycée bilingue en bonus à Nkozoa**

Situé dans l’arrondissement de Soa, département de la Mefou et Afamba, région du Centre, Nkozoa a également été retenue comme devant abriter une école maternelle et primaire bilingue (prévue sur une superficie de 1,5 hectares, donc le site en tout s’étend sur une surface de 3 545 m2). Objet du second périple du Minedub effectué le 29 janvier dernier, Nkozoa en plus des bâtiments précités aura en bonus un lycée bilingue qui s’étendra sur une superficie de 1,5 hectare de terrain.

Avec l’hébergement de ces infrastructures, Nkozoa devient ainsi une réserve domaniale de l’Etat où doit-être implanté des services prioritaires de base comme des écoles et des hôpitaux. Un développement de cette localité donc se réjouis Embolo Essama, maire de la commune d’arrondissement de Soa, « Je suis très heureux que l’arrondissement de Soa ait été  choisi pour accueillir une des premières écoles témoins de notre pays. C’est un sentiment de reconnaissance à l’ endroit du Chef de l’Etat. Comme vous le savez Soa se trouve dans une situation privilégiée, pour l’enfant qui entre à la maternelle peut sortir à l’université sans avoir besoin de se déplacer pour faire ses études. C’est la raison pour laquelle nous sommes très sensible à la qualité de l’enseignement, parce que nous voulons que les enfants de Soa soient en concurrentiel à l’université avec les jeunes provenant de tous les autres coins du Cameroun. »

En rappel, outre Afan-yo’o et Nkozoa, deux autres ville notamment Touboro située dans le  département du Mayo-Rey, région du Nord, ainsi que Douala, dans le Littoral précisément à Bonabéri abriteront des écoles bilingue témoins. Pour les  régions restantes, cette opération s’effectuera de façon crescendo.

Sous instruction du Président de la République Paul Biya, par ailleurs initiateur du projet de construction de ces écoles publiques bilingue témoins, le ministre de l’éducation de base(Minedub), Laurent Serge Etoundi Ngoa accompagné du gouverneur de la région du centre Naseri Paul Bea et autres autorités administratives et politiques  a procédé et ceux durant deux jours à la cérémonie de la pose de la première pierre des bâtiments devant abriter ces édifices futuristes de formation de la pensée et du savoir. Ces écoles modernes sont construites dans des zones d’éducation prioritaires c’est-à-dire des zones où l’arrivée de ces infrastructures a été tardive.

De ce fait, le 28 janvier dernier, le Minedub a débuté son périple à Afan-yo’o, localité située dans l’arrondissement de Yaoundé 3. Dans cette partie, plus d’un hectare de terrain a été réquisitionné par l’Etat afin que sorte de terre une école maternelle et primaire bilingue. De façon concrète, l’édifice complet comprendra un bâtiment administratif, une salle polyvalente, des salles de classe, un bâtiment pédagogique, deux logements directeurs, un logement pour enseignant, une cantine, une clôture et des aires de jeu pour enfants (terrain de football, basketball, tennis…). Cette initiative a été salué à sa juste valeur par le chef de 3e degré d’Afan-yo’o, Faustin Olomo, « Monsieur le ministre par cet acte vous signer l’acte de naissance de la nouvelle version de l’école publique d’Afan-yo’o qui va intégrer les deux sous-systèmes anglophones et francophones. Les parents sont très fiers de savoir que dans un avenir très proche, leurs enfants seront capables de s’exprimer aisément en anglais et en français. Le bilinguisme ainsi prôné par le chef de l’Etat, creuset de l’intégration de l’unité nationale et du vivre-ensemble trouve ici son implémentation. A la suite de la création de cette école publique témoin, nous vous remercions d’y avoir annexé une école maternelle publique opérationnelle depuis 2019 dans un site et un local offert gratuitement par une élite. Notre souhait est qu’elle puisse bénéficier des mêmes équipements de l’école publique témoin. »

Dans son allocution de circonstance, le maire de la commune d’arrondissement de Yaoundé 3, Lucas Owona à demander aux populations de faire bonne usage de cette école témoin, qui ne représente rien d’autre que le devenir des enfants. Pour lui, malgré les crises sanitaires et sécuritaires donc fait fasse le pays actuellement, le Président de la République continue d’accorder une place de choix à l’éducation en lui dotant des moyens conséquents. Il a terminé en émettant le vœu de voir certaines écoles de sa commune être relooker, parce que frapper par la vétusté des bâtiments.

C’est sur une période de trois mois que va s’étendre les travaux de construction de ces écoles  primaires, maternelles et lycée bilingue témoins, sous financement relevant su budget d’investissement publics(Bip) 2020. « La conception des écoles témoins donc le lancement de la construction des quatre premières se tient à Afan-yo’o est liée au fait que le Président de la République a vu l’état des écoles qui étaient projeter à la télévision, et il a posé la question de savoir si les écoles japonaise qui font la notoriété aujourd’hui sont les seules qui puissent le faire ? Est-ce que ce n’est pas des camerounais qui ont construit ces écoles ? Il a donc souhaité que nous ayons désormais un type d’école similaire que nous allons construire dans toutes les régions du pays .Le spécimen qui vos ait présenté montre l’ambition du Président de la République de doter sa jeunesse d’infrastructures fonctionnelles, modernes et fiables en durabilité. Avec cela, l’environnement pédagogique au sein de ces écoles permettra aux élèves d’être performants pour bâtir un pays prospère avec des citoyens bien formés. Mon souhait est que dans un futur proche, nous puisons nous réunir ici pour inaugurer ce joyau qui prendra corps d’ici quelques semaines. », Indique Laurent Serge Etoundi Ngoa, Minedub.

**Un lycée bilingue en bonus à Nkozoa**

Situé dans l’arrondissement de Soa, département de la Mefou et Afamba, région du Centre, Nkozoa a également été retenue comme devant abriter une école maternelle et primaire bilingue (prévue sur une superficie de 1,5 hectares, donc le site en tout s’étend sur une surface de 3 545 m2). Objet du second périple du Minedub effectué le 29 janvier dernier, Nkozoa en plus des bâtiments précités aura en bonus un lycée bilingue qui s’étendra sur une superficie de 1,5 hectare de terrain.

Avec l’hébergement de ces infrastructures, Nkozoa devient ainsi une réserve domaniale de l’Etat où doit-être implanté des services prioritaires de base comme des écoles et des hôpitaux. Un développement de cette localité donc se réjouis Embolo Essama, maire de la commune d’arrondissement de Soa, « Je suis très heureux que l’arrondissement de Soa ait été  choisi pour accueillir une des premières écoles témoins de notre pays. C’est un sentiment de reconnaissance à l’ endroit du Chef de l’Etat. Comme vous le savez Soa se trouve dans une situation privilégiée, pour l’enfant qui entre à la maternelle peut sortir à l’université sans avoir besoin de se déplacer pour faire ses études. C’est la raison pour laquelle nous sommes très sensible à la qualité de l’enseignement, parce que nous voulons que les enfants de Soa soient en concurrentiel à l’université avec les jeunes provenant de tous les autres coins du Cameroun. »

En rappel, outre Afan-yo’o et Nkozoa, deux autres ville notamment Touboro située dans le  département du Mayo-Rey, région du Nord, ainsi que Douala, dans le Littoral précisément à Bonabéri abriteront des écoles bilingue témoins. Pour les  régions restantes, cette opération s’effectuera de façon crescendo.

**Le ministre de l’éducation de base Laurent Serge Etoundi Ngoa a procédé les 28 et 29 janvier dernier a une double cérémonie de pose de première pierre respectivement à Afan-yo’o et Nkozoa.**

**Myriane Djamegne**

Sous instruction du Président de la République Paul Biya, par ailleurs initiateur du projet de construction de ces écoles publiques bilingue témoins, le ministre de l’éducation de base(Minedub), Laurent Serge Etoundi Ngoa accompagné du gouverneur de la région du centre Naseri Paul Bea et autres autorités administratives et politiques  a procédé et ceux durant deux jours à la cérémonie de la pose de la première pierre des bâtiments devant abriter ces édifices futuristes de formation de la pensée et du savoir. Ces écoles modernes sont construites dans des zones d’éducation prioritaires c’est-à-dire des zones où l’arrivée de ces infrastructures a été tardive.

De ce fait, le 28 janvier dernier, le Minedub a débuté son périple à Afan-yo’o, localité située dans l’arrondissement de Yaoundé 3. Dans cette partie, plus d’un hectare de terrain a été réquisitionné par l’Etat afin que sorte de terre une école maternelle et primaire bilingue. De façon concrète, l’édifice complet comprendra un bâtiment administratif, une salle polyvalente, des salles de classe, un bâtiment pédagogique, deux logements directeurs, un logement pour enseignant, une cantine, une clôture et des aires de jeu pour enfants (terrain de football, basketball, tennis…). Cette initiative a été salué à sa juste valeur par le chef de 3e degré d’Afan-yo’o, Faustin Olomo, « Monsieur le ministre par cet acte vous signer l’acte de naissance de la nouvelle version de l’école publique d’Afan-yo’o qui va intégrer les deux sous-systèmes anglophones et francophones. Les parents sont très fiers de savoir que dans un avenir très proche, leurs enfants seront capables de s’exprimer aisément en anglais et en français. Le bilinguisme ainsi prôné par le chef de l’Etat, creuset de l’intégration de l’unité nationale et du vivre-ensemble trouve ici son implémentation. A la suite de la création de cette école publique témoin, nous vous remercions d’y avoir annexé une école maternelle publique opérationnelle depuis 2019 dans un site et un local offert gratuitement par une élite. Notre souhait est qu’elle puisse bénéficier des mêmes équipements de l’école publique témoin. »

Dans son allocution de circonstance, le maire de la commune d’arrondissement de Yaoundé 3, Lucas Owona à demander aux populations de faire bonne usage de cette école témoin, qui ne représente rien d’autre que le devenir des enfants. Pour lui, malgré les crises sanitaires et sécuritaires donc fait fasse le pays actuellement, le Président de la République continue d’accorder une place de choix à l’éducation en lui dotant des moyens conséquents. Il a terminé en émettant le vœu de voir certaines écoles de sa commune être relooker, parce que frapper par la vétusté des bâtiments.

C’est sur une période de trois mois que va s’étendre les travaux de construction de ces écoles  primaires, maternelles et lycée bilingue témoins, sous financement relevant su budget d’investissement publics(Bip) 2020. « La conception des écoles témoins donc le lancement de la construction des quatre premières se tient à Afan-yo’o est liée au fait que le Président de la République a vu l’état des écoles qui étaient projeter à la télévision, et il a posé la question de savoir si les écoles japonaise qui font la notoriété aujourd’hui sont les seules qui puissent le faire ? Est-ce que ce n’est pas des camerounais qui ont construit ces écoles ? Il a donc souhaité que nous ayons désormais un type d’école similaire que nous allons construire dans toutes les régions du pays .Le spécimen qui vos ait présenté montre l’ambition du Président de la République de doter sa jeunesse d’infrastructures fonctionnelles, modernes et fiables en durabilité. Avec cela, l’environnement pédagogique au sein de ces écoles permettra aux élèves d’être performants pour bâtir un pays prospère avec des citoyens bien formés. Mon souhait est que dans un futur proche, nous puisons nous réunir ici pour inaugurer ce joyau qui prendra corps d’ici quelques semaines. », Indique Laurent Serge Etoundi Ngoa, Minedub.

**Un lycée bilingue en bonus à Nkozoa**

Situé dans l’arrondissement de Soa, département de la Mefou et Afamba, région du Centre, Nkozoa a également été retenue comme devant abriter une école maternelle et primaire bilingue (prévue sur une superficie de 1,5 hectares, donc le site en tout s’étend sur une surface de 3 545 m2). Objet du second périple du Minedub effectué le 29 janvier dernier, Nkozoa en plus des bâtiments précités aura en bonus un lycée bilingue qui s’étendra sur une superficie de 1,5 hectare de terrain.

Avec l’hébergement de ces infrastructures, Nkozoa devient ainsi une réserve domaniale de l’Etat où doit-être implanté des services prioritaires de base comme des écoles et des hôpitaux. Un développement de cette localité donc se réjouis Embolo Essama, maire de la commune d’arrondissement de Soa, « Je suis très heureux que l’arrondissement de Soa ait été  choisi pour accueillir une des premières écoles témoins de notre pays. C’est un sentiment de reconnaissance à l’ endroit du Chef de l’Etat. Comme vous le savez Soa se trouve dans une situation privilégiée, pour l’enfant qui entre à la maternelle peut sortir à l’université sans avoir besoin de se déplacer pour faire ses études. C’est la raison pour laquelle nous sommes très sensible à la qualité de l’enseignement, parce que nous voulons que les enfants de Soa soient en concurrentiel à l’université avec les jeunes provenant de tous les autres coins du Cameroun. »

En rappel, outre Afan-yo’o et Nkozoa, deux autres ville notamment Touboro située dans le  département du Mayo-Rey, région du Nord, ainsi que Douala, dans le Littoral précisément à Bonabéri abriteront des écoles bilingue témoins. Pour les  régions restantes, cette opération s’effectuera de façon crescendo.

**Myriane Djamegne**

<https://lavoixducentre.cm/afan-yoo-et-nkozoa-des-ecoles-temoins-bilingue-en-gestation>

1. **Guerre dans le Noso – Un faux ex combattant séparatiste dénonce le gouvernement**

Par

[**La Voix du Centre**](https://lavoixducentre.cm/author/lavoixducentre)

 -

8 février 2021

**Approché par les autorités pour jouer le rôle d’ancien sécessionniste reconverti l’intéressé témoigne tout son mécontentement sous anonymat.**

«  On m’avait contacté pour faire semblant d’être un ancien ambazonien qui a abandonné la forêt pour suivre désormais les institutions en place. J’ai accepté. On m’avait promis une forte somme d’argent pour passer à la télévision faire un faux témoignage. J’ai accepté. Mais à la fin je me retrouve abandonné. Je n’ai même pas reçu le 1/10 de  l’argent  qu’on m’avait promis et aujourd’hui je suis seul et complètement ignoré ».

Le délit que l’on perçoit à travers les lamentations de ce faux ex indépendantiste pourrait se prolonger jusqu’au niveau des acteurs impliqués dans la résolution de la crise dans les régions du Nord-Ouest et du Sud-Ouest. Sans analyse aucune l’on saisit mieux la duperie et la manigance des décideurs dans le jeu qui consisterait à faire oublier les armes aux civils armés et à rejoindre l’État. Un élan publicitaire sans résultat probant. Pourtant dans les discours politiques et  officiels la présentation quasi quotidienne des personnes indexées jadis comme indépendantistes envahit quelques vitrines. Mais on est bien loin de cet aspect fabuleux du désarmement des séparatistes. « Nous étions nombreux à accepter la proposition du gouvernement de nous présenter publiquement comme anciens combattants ambazoniens. » Précise notre source sans donner les détails sur ce qui est advenu des autres. Un autre fait tout au moins plus grave que l’oubli des agents ayant motivés leur implication dans ce jeu trouble demeure la stigmatisation de ce dernier et les promesses de mort qui pèsent sur lui. «  Dès que les membres de  ma famille m’ont vu à la télévision et écouté mes propos sur mon ancienne vie dans la forêt ce qui n’était pas vrai, ils m’ont dit que je ne suis plus leur enfant. Je suis obligé de vivre cacher.

Même dans mon village dans le Nord-Ouest je n’ai plus accès. Tout le monde me promet le pire. Je ne sais plus quoi faire ni comment vivre ». Le regret dans son expression risquerait d’être pareil pour ces camerounais exhibés pour affirmer un choix moyennant quelques billets de banque mais à leurs risques et périls. La médiatisation du mensonge au profit de quelques figures bien protégées dans le sérail livre au contraire les plus faibles animés par le goût du lucre à la sentence d’une part incitée par les indépendantistes proprement dits et les familles de ces faux ex partisans de la sécession presque obligées de renier les leur pour avoir la vie sauve d’autre part. Après les fausses déclarations et le partage d’un peu de gain s’en suivent donc des cas d’individus piégés entre le marteau et l’enclume. Mais le gouvernement quant à lui enregistre dans son compteur d’action politique et politicien un grand nombre d’ex indépendantistes armés désormais sous ses bons soins.

Quitte à ce que les crédules chantent ses louanges. Pendant ce temps les victimes de sa ruse perdent leur emploi, la considération voire la vie. Tout est réduit en une consigne «  l’efficacité » que  Machiavel inspire à chaque prince peu importe la façon dont elle menée.  Sans halte ni lendemain notre source a dû abandonner son commerce de rideaux dans un marché populeux de Yaoundé par crainte de représailles. Malgré les proclamations faites par le gouvernement sur l’abandon des combattants armés la guerre  se poursuit dans les régions anglophones avec ses morts et réfugiés.

<https://lavoixducentre.cm/guerre-dans-le-noso-un-faux-ex-combattant-separatiste-denonce-le-gouvernement>

1. **Sdf – Ni John Fru Ndi fait ses adieux**

Par

[**La Voix du Centre**](https://lavoixducentre.cm/author/lavoixducentre)

15 février 2021

**Le chairman du Social Democratic Front (Sdf) prend la carte de sa retraite politique.**

C’est au cours d’un déjeuner de presse offert le 11 du mois courant dans son domicile à Yaoundé que Ni John Fru  Ndi président- fondateur  du Sdf a annoncé la fin de sa carrière politique. “ Je ne participerai plus à aucune élection” a- t- il fait savoir face à son auditoire non pas sans égrener l’historique de son action politique dans l’opposition. Combattant de première heure dès l’avènement du multipartisme dans les années 90 Ni John Fru Ndi a été sur tous les fronts pour challenger Paul Biya avec pour principal objectif l’instauration d’un nouveau système à la tête du Cameroun. D’idéologie sociale démocratique son ambition pour une gouvernance fédérale à dix États a longtemps épuisé son action.

Meneur d’hommes il a réussi à faire intégrer sa vision à une large majorité de la population notamment celle des régions anglophones autrefois fief de son parti politique ainsi que le grand littoral et plus précisément le Moungo. “ Power to the people”, “Biya must go ”, “ Suffer dont finish” et bien d’autres slogans populistes ont animé sa démarche pour la conquête du palais d’Etoudi.  Sorti officiellement deuxième à l’élection présidentielle de 1992 avec un score de 36⁰/o derrière Paul Biya sa victoire à cette échéance n’a cessé de faire l’objet d’une polémique entre les dirigeants en place depuis 39ans et bon nombre d’acteurs de la société civile et de l’opposition dont les seconds convaincus de la victoire de Ni John Fru Ndi à cette consultation populaire n’ont cessé de qualifier de “ tripatouillage” ce vote d’il y’a 29 ans.

Mais au fil du temps le Sdf a perdu son aura. Le système Biya aura réussi à fragiliser l’équipe du chairman en octroyant de hautes fonctions juteuses aux anciens cadres du Sdf depuis lors membres actifs et figures influentes du Rassemblement démocratique du peuple camerounais ( Rdpc) parti au pouvoir. Dans le même temps des observateurs politiques ont agrémenté un rapprochement entre le Sdf et le régime de Yaoundé. Au bout du compte la crise dans les régions anglophones et les désertions en masse des rangs du Sdf dans le littoral ont contribué à fragiliser l’ancien principal opposant de Paul Biya et son camp. Absent à l’élection présidentielle d’Octobre 2018 au profit de Joshua Oshi premier vice-président du Sdf sorti abattu des suffrages a occupé la quatrième place avec un score de 3⁰/o, toute preuve de son essoufflement.

C’est donc un parti politique affaibli que lègue Ni John Fru Ndi à la postérité. Ainsi s’ouvre un nouveau boulevard de la relance du Sdf rangé entre l’ aile modérée du parti soutenue par Joshua Oshi jugé proche du régime mais à côté de lui se développe une tendance radicale solidement opposée à Yaoundé pilotée par Pierre Waffo et Michel Nitcheu. Après avoir consacré 31 ans de sa vie à la politique Ni John Fru Ndi âgé de 80 ans entre au panthéon des leaders politiques qu’a connu le Cameroun sous l’ère du Renouveau.

**William Omer Tchuisseu**

1. **Diplomatie – Les États-Unis aux côtés de la jeunesse camerounaise**

Par

[**La Voix du Centre**](https://lavoixducentre.cm/author/lavoixducentre)

 -

16 février 2021

**L’ambassade des États-Unis d’Amérique (Usa) au Cameroun a adressé un message d’encouragement aux jeunes  à l’occasion de la fête qui leur est consacrée tous le 11 février de chaque année et ce depuis 1966.**

« Le 11 février, les enfants et les jeunes des dix régions du Cameroun – de Mamfe à Yokadouma, de Kousseri à Ambam – célèbrent la capacité et l’engagement de cette génération à contribuer à la construction d’un avenir pacifique et prospère.  Après quatre ans de conflit armé dans les régions anglophones, de cycles successifs de crise humanitaire et de déplacement, de violentes attaques extrémistes dans la région de l’Extrême-Nord et la pandémie mondiale du Covid-19 dont les répercussions économiques sont importantes, la jeunesse camerounaise continue de montrer sa forte résilience et son potentiel. », a écrit le chef de la diplomatie américaine à Yaoundé. Ce dernier se dit notamment satisfait de du courage et de la résilience dont a fait preuve la jeunesse camerounaise au cours de ces dernières années marquées par les crises sanitaire d’une part et sécuritaire d’autre part. Il invite notamment les Camerounais de tous bords à ne ménager aucun effort pour mettre fin à la guerre dans les régions anglophones et à construire une paix durable : “  En ce jour spécial, nous encourageons tous les Camerounais dans leur remarquable diversité, à prendre des mesures significatives pour défendre la paix et faire en sorte que chaque enfant puisse aller à l’école en toute sécurité, contribuer à l’avancement de la communauté et acquérir les compétences nécessaires à la vie et à la réussite dans l’économie de demain.”

Le message s’achève par un vœu si cher à tous les Camerounais: “Que cette année apporte la paix.”. Ce communiqué de presse  intervient après la prise de fonction du nouveau chef de l’État américain. Un signe fort qui marque la rupture avec la diplomatie américaine sous l’aire Trump. Celle du 46ème  président des Usa se veut plus présente sur la scène politique mondiale et africaine en particulier. “America is back”. Traduction, les États-Unis sont de retour, a déclaré le nouveau patron de la Maison Blanche le 20 janvier dernier lors de son discours d’investiture. Un communiqué de presse comme celui de ce 11 février démontre à suffire s’il en était encore besoin que le pays de l’oncle Sam entend bien s’impliquer dans la  politique africaine en général et camerounaise plus précisément. Ce mandat de Joe Biden est celui de tous les espoirs pour de nombreux Camerounais qui espèrent une réelle médiation de la première puissance mondiale dans la résolution du conflit armé dans le Nord-Ouest et le Sud-Ouest. L’on se souvient qu’au cours des quatre années de présidence de Donald Trump, bon nombre d’acteurs de la crise ont  plusieurs fois sollicité l’arbitrage du 45ème chef de l’État américain. Mais son implication dans cette affaire n’était pas à la hauteur des attentes. Tout porte donc à croire que ce message du président Biden par le truchement de son diplomate en service à Yaoundé est l’hirondelle qui annonce le printemps. Juste wait and see

**Luigina Monok**

<https://lavoixducentre.cm/diplomatie-les-etats-unis-aux-cotes-de-la-jeunesse-camerounaise>

1. **Porté disparu – Franklin Mowha ne décroche plus son téléphone**

Par

[**La Voix du Centre**](https://lavoixducentre.cm/author/lavoixducentre)

 -

1 avril 2021

**Dans son village à Bambui près de Bamenda ses proches vivent dans la détresse…Interpellé par Amnesty international et d’autres organisations de défense des droits humains, le gouvernement camerounais n’a toujours pas, plus de 30 mois après, ouvert d’enquête suite à la disparition de Franklin Mowha.**

Le souvenir de la physionomie de baroudeur qu’affichait Franklin Mowha, 35 ans environ,  est devenu bien lointain pour Lagou Amadou, berger dans le campement de Sanki et membre de la communauté Mbororo de Bangangté. Il est réellement troublé. Comme plusieurs personnes secourues par le président de l’association de défense des droits humains, Front des défenseurs pour l’intérêt citoyen (Frontline Fighters for Citizen Interest) et membre du Réseau de défense des droits humains en Afrique centrale (Redhac), porté disparu depuis le 06 août 2018 aux environs de la ville de Kumba.   Cette localité est secouée par le conflit armé qui oppose, depuis 2016, les soldats gouvernementaux camerounais aux présumés combattants séparatistes anglophones dans les régions anglophones du Nord-Ouest et du Sud-Ouest.

**Le berger désespéré**

Ainsi, plus le temps passe, ce berger désespère et se lasse. Il ne sait plus à quel saint se vouer «Franklin Mowha a beaucoup contribué à combattre les injustices dont étaient victimes les membres de la minorité Mbororo dans le département du Ndé. Il a beaucoup œuvré pour que les droits pécuniaires et la dignité de Lagou Amadou soient restaurés par la Cour d’appel de l’Ouest à Bafoussam suite à un conflit naguère survenu entre le berger Mbororo et un agriculteur de Bangangté », explique Théophile Nono ingénieur agronome et défenseur des droits humains. Journaliste ayant interviewé et fait diffusé un entretien avec Franklin Mowha pour le compte du site d’information en ligne www.camer.be courant le mois de juillet 2018, moins de trois semaines avant sa disparition, Alain Ndanga est lui-aussi déboussolé lorsque l’on évoque la question de la disparition de M. Mowha. L’homme de média estime avoir fait son travail de journaliste en donnant la parole au défenseur des droits humains. Pour lui, l’interview  a dit des choses sérieuses sur lesquelles il ne veut pas s’étaler suite à cette disparition. Il documentait des cas de violations des droits humains dans une région anglophone du Cameroun.

**Plainte sans suite…**

« Après avoir tenté de l’appeler pendant une semaine, ses proches ont fini par se résigner, son téléphone n’émettant plus aucun signal. Depuis, associés à d’autres Ong locales, ils ont porté plainte pour disparition auprès des autorités camerounaises.  Ces dernières restent silencieuses. M. Mowha se sentait menacé depuis quelque  temps. Il avait déjà été arrêté et détenu à plusieurs reprises. Les autorités camerounaises, respectueuses du droit international, ont des obligations en ce qui concerne la protection des défenseurs des droits humains. Elles doivent impérativement entreprendre les enquêtes nécessaires en vue de retrouver Franklin Mowha et informer sa famille et ses proches de l’endroit où il pourrait être détenu, de ses conditions de détention », analyse-t-on au niveau de l’Action catholique pour l’abolition de la torture. L’observatoire de la Fédération internationale des droits de l’Homme parle de : «Disparition forcée de M. Franklin Mowha, Président de FFCI ». Le 25 septembre 2018, elle a produit un rapport (CMR 003 / 0918 / OBS 117) détaillé sur les circonstances de cette tragédie. En lançant, un « APPEL URGENT » aux défenseurs des droits humains : « L’Observatoire pour la protection des défenseurs des droits de l’Homme, un partenariat de la FIDH et de l’Organisation mondiale contre la torture (OMCT), vous prie d’intervenir de toute urgence dans la situation suivante au Cameroun »

**Mobilisation**

Pour l’Observatoire, M. Franklin Mowha a eu ses derniers échanges téléphoniques avec son épouse et ses collègues, depuis l’hôtel Azim, situé dans la localité de Kumba, dans le sud-ouest du Cameroun. M. Mowha s’était rendu à Kumba le 2 août 2018 pour effectuer une mission de documentation des cas de violations des droits humains dans le cadre de la crise sociopolitique dans les régions du nord-ouest et sud-ouest du pays. Le registre de l’hôtel Azim montre que M. Mowha y a bien séjourné du 2 au 6 août 2018. Après le 6 août, lorsque ses proches essayaient de le contacter, le téléphone de M. Mowha sonnait dans le vide, jusqu’au 14 août, où il a cessé d’émettre.

Les membres de  FFCI, le REDHAC et la famille de M. Mowha se sont mobilisés pour tenter de le retrouver, en se rendant auprès de la gendarmerie de Buea (où M. Mowha avait prévu de rencontrer le chef d’État-major), la délégation régionale à la sûreté nationale et la prison de Buea, de même que la gendarmerie de Kumba, en vain. Le 6 septembre 2018, un mois après la disparition, l’association FFCI a porté plainte contre X auprès du procureur de la République du tribunal de première instance de Kumba pour la disparition forcée de M. Franklin Mowha. FFCI n’a été informée d’aucun développement jusqu’à ce jour. L’Observatoire rappelle que M. Franklin Mowha a été arrêté et détenu à diverses reprises dans le cadre de ses activités de défense et protection des droits humains  Depuis juin 2018, il avait signalé au REDHAC se sentir menacé par des personnes non identifiées. « L’Observatoire exprime ses plus vives inquiétudes quant à la disparition forcée de M. Franklin Mowha, qui semble être liée à l’exercice de ses activités de documentation des violations des droits humains, et appelle les autorités camerounaises à mener une enquête immédiate, impartiale et transparente quant à cette disparition », souligne le document rédigé par cette organisation apparenté à la Fidh. Et comme actions requises, l’Observatoire prie toutes les organisations de défense des droits humains  de bien vouloir écrire aux autorités camerounaises en leur demandant de garantir en toutes circonstances l’intégrité physique et psychologique de M. Franklin Mowha, ainsi que de l’ensemble des défenseurs des droits de l’Homme dans le pays  et de mener une enquête immédiate, impartiale et transparente afin de divulguer le lieu de détention de M. Franklin Mowha et le libérer de manière inconditionnelle  Cette organisation appelle le gouvernement Camerounais à se conformer aux dispositions de la Déclaration sur les défenseurs des droits de l’Homme, adoptée par l’Assemblée générale des Nations unies le 9 décembre 1998, et tout particulièrement ses articles 1 et 12.2  et d’assurer en toutes circonstances le respect des droits humains et des libertés fondamentales conformément aux instruments internationaux relatifs aux droits humains ratifiés par le Cameroun. Avocat au barreau du Cameroun, Me Joseph Lavoisier Tsapy est lui aussi indigné par les circonstances de cette disparition. « J’ai eu beaucoup de sympathie pour Franklin Mowha que j’ai rencontré à plusieurs reprises quand il était détenu à la prison centrale de Bafoussam, alors que je défendais ses intérêts. Je constate  qu’il s’est engagé dans une opération très risquée à un moment où la guerre faire rage dans le Noso. Je ne présume pas que celui-ci a été victime d’exécution extrajudiciaire. Si c’est le cas, il resterait à chercher qui l’a tué, où et comment son corps a été enterré… », Explique l’avocat et défenseur des droits humains. Pour lui, la Convention internationale pour la protection de toutes les personnes contre les disparitions forcées a été violée.L’article 1 de ce texte interdit les disparitions forcées; aucune circonstance exceptionnelle, quelle qu’elle soit, qu’il s’agisse de l’état de guerre ou de menace de guerre, d’instabilité politique intérieure ou de tout autre état d’exception.

**Réparation et indemnisation**

La pratique généralisée ou systématique de la disparition forcée constitue un crime contre l’humanité, ainsi que le prévoit l’article 5. Tout État partie à la Convention s’engage également à prendre les mesures appropriées pour enquêter sur les infractions de disparition forcée et traduire les responsables en justice et prendre les mesures nécessaires pour que la disparition forcée constitue une infraction au regard de son droit pénal. Tout comme, il doit prendre les mesures nécessaires pour établir sa compétence en cas de crime de disparition forcée quand l’auteur présumé de l’infraction se trouve sur tout territoire sous sa juridiction, qu’il soit ou non l’un de ses ressortissants et coopérer avec les autres États pour garantir que les auteurs de telles infractions soient poursuivis ou extradés, et pour aider les victimes de disparition forcée les localiser et restituer leurs restes. Pour le cas de Franklin Mowha comme pour plusieurs autres cas de disparitions forcées, aucune action significative n’a été entreprise par les autorités camerounaises. Certes le ministre de l’Administration territoriale, Paul Atanga Nji, ne cesse de rassurer l’opinion sur un retour à la normale et des sanctions à prendre contre les criminels. De même, il est régulièrement porteur d’aide humanitaire aux populations civiles en zone de guerre ou déplacées dans les autres régions du pays. Mais est-ce suffisant pour calmer le chagrin de la compagne de Franklin Mowha et des bambins qu’il laissés du côté de Bambui près de Bamenda ?

Au regard de l’article 24. 4, l’Etat ne doit-il pas respecter les normes juridiques minimales applicables en matière de privation de liberté, y compris le droit à contester son emprisonnement devant un tribunal ; procéder à l’enregistrement de toutes les personnes emprisonnées et permettre que ce registre soit consulté par les proches et l’avocat ; garantir que les victimes d’une disparition forcée ou les personnes directement concernées aient le droit d’obtenir réparation et d’être indemnisées ?

**Guy Modeste Dzudie (Jade)**

<https://lavoixducentre.cm/porte-disparu-franklin-mowha-ne-decroche-plus-son-telephone>

1. **Crise anglophone – Près d’une cinquantaine de morts en 3 jours**

Par

[**La Voix du Centre**](https://lavoixducentre.cm/author/lavoixducentre)

 -

30 mai 2018

**La région du Nord-ouest a été le théâtre des affrontements entre armée et sécessionnistes tout au long du week-end dernier.**

Le bilan s’alourdit dans ce que l’on surnomme désormais « crise anglophone ». Le 25 mai 2018, 22 personnes ont été tuées lors d’un affrontement entre l’armée et groupe de sécessionniste à Menka dans la région du Nord-ouest. L’information publiée par l’Agence France Presse (AFP) a été donnée par l’honorable Nji Tumasang, député du parti du Social Democratic Front (SDF) de Santa, l’arrondissement où se trouve ladite localité. L’incident s’est produit dans un hôtel de la ville où après avoir été alertée, l’armée est intervenue et il ya eu échanges de tirs et par la suite la neutralisation de plusieurs terroristes. Interrogée sur les faits, la population a reconnu avoir été témoin des échanges de tirs mais elle ne saurait dire s’il s’agissait des criminels ou des sécessionnistes qui ont l’habitude de le faire. Le lendemain des faits, Ni John Fru Ndi, président du SDF accompagné d’une délégation s’est rendu sur les lieux question de témoigner des faits. Pour le député du SDF « trois autres personnes, dont une soupçonnée d’appartenir au groupe de l’hôtel et un conducteur de mototaxi, ont été arrêtées dans un hôpital d’une localité voisine et exécutées par des soldats ». L’AFP rapporte également qu’il a avait que « d’après des «familles» du village, 18 personnes avaient été tuées à Menka. Un témoin oculaire avait lui indiqué que huit corps d’hommes jeunes avaient été découverts ».

Deux jours plus tard c’est-à-dire le 27 mai, une information selon laquelle à « Bali- Bamenda un bouclage organisé après un échange de coups de feux avec les Ambazoniens fait état d’un bilan de 27 morts. C’est le côté ennemi qui paye le lourd tribut avec des hommes et femmes tués, plusieurs munitions récupérées vers Pignin près de Santa dans la même région. Ces chiffres viennent allonger la liste déjà longue si l’on s’en tient aux chiffres du Centre d’études International Crisis Group (ICG), « au moins 120 civils et au moins 43 membres des forces de sécurité ont été tués depuis fin 2016 ».

**Marie-France Ibel**

<https://lavoixducentre.cm/crise-anglophone-pres-dune-cinquantaine-de-morts-en-3-jours>

1. **Presse en danger – La pression continue de peser sur les journalistes**

Par

[**La Voix du Centre**](https://lavoixducentre.cm/author/lavoixducentre)

2 février 2019

Keumogni Nolle Ghislaine Francine, Journaliste n’a pas fait de vie depuis décembre 2017.

La grande famille de la presse camerounaise en général et sa famille en particulier restent sans nouvelles de celle que ses confrères appelaient affectueusement la « combattante » à cause de son courage à ne reculer devant aucun obstacle et son goût prononcer de la recherche de la vérité.

Les faits remontent à septembre 2017 plus d’un an après le début de ce qu’on a qualifié ici de crise anglohone. Sa rédaction vient de la détacher pour suivre de près l’évolution de cette crise quand survient malheureusement une attaque de l’armée camerounaise contre une base cachée des sécessionnistes dissimulée dans un quartier de la ville de Buea. Dans leur fuite les ambazoniens comme ils se font appelés ici parceque se réclamant désormais appartenir à l’Amazonie, référence faite à la république imaginaire d’Amazonie, son domicile et plusieurs autres maisons de ce quartier seront incendiés. Dans ce coup du sort notre consœur perdra tout ou presque. D’abord son compagnon rentré juste quelques temps avant et son dernier enfant pas encore à l’âge de scolarité qui succomberont 2 jours après dans un hôpital de la ville suite à leur brûlure qualifié de 3ème degré. Keumogni Nolle Ghislaine Francine qui vient de perdre son domicile, son compagnon et son dernier enfant n’est qu’au début de ses problèmes puisqu’après elle devra faire face aux multiples interpellations et accusations de la police qui la soupçonne d’avoir eu vent de cette base cachée des «ambaboys» sans qu’elle ne l’ait dénoncée. Malgré les affirmations répétées de cette dernière de son innocence, elle sera obligé de quitter la ville pour une destination inconnue jusqu’à ce jour, laissant ainsi derrière elle ses deux autres enfants non sans avoir le cœur complètement meurtri.

 Aujourd’hui on n’a toujours pas de nouvelles d’elle. Des milliers de familles sont dans cet état au Cameroun depuis qu’a éclaté cet autre conflit qui vient une fois de plus rendre plus difficile la vie aux camerounais.

***Samy Zato***

<https://lavoixducentre.cm/presse-en-danger-la-pression-continue-de-peser-sur-les-journalistes>

1. **L’armée Camerounaise libére des expatriés européens détenus comme otages dans la zone anglophone**

Par

[**La Voix du Centre**](https://lavoixducentre.cm/author/lavoixducentre)

4 avril 2018

Une déclaration du gouvernement Camerounais confirme l’enlèvement de 16 otages donc 4 Camerounais et onze Européens dans la région du Sud-Ouest Cameroun par les groupes sécessionnistes. Ils ont été libérés par l’armée Camerounaise ce 4 avril 2018.

 Le gouvernement affirme que les 7 Suisses et les Italiens étaient en route vers l’un des sites touristiques de la région quand ils ont été enlevés. Jusque là aucun des groupes sécessionnistes n’a encore revendiqué ces enlèvements. Il y a juste un mois un ingénieur Tunisien avait été tué par ses ravisseurs dans la même région.

Cho Ayaba, leadeur d’Ambazonian Defence Force (ADF) déclare «L’ADF arrête les facilitateurs et collaborateurs de la République du Cameroun et non des ressortissants étrangers ».

**Amayeneh Massia Thérèse Fernanda**

<https://lavoixducentre.cm/larmee-camerounaise-libere-des-expatries-europeens-detenus-hotages-dans-la-zone-anglophone>

1. **Grand Dialogue National et ingérences etrangères – Les mises en garde de l’Union des Populations du Cameroun**

Par

[**La Voix du Centre**](https://lavoixducentre.cm/author/lavoixducentre)

 -

25 septembre 2019

***C’est par les propos de Robert Bapooh Lipot que L’Union des Populations du Cameroun a frappé la main sur la table quand au complot des officines étrangères en vue de l’échec de ce rendez vous.***

C’était une journée chargé pour les militants et sympathisans de cette formation politique qui se sont retrouvés à Yaoundé pour leur reunion du bureau politique, couplée à une conférence de presse le 24 Septembre 2019. “Le bureau politique felicite le chef de l’état pour sa fermeté à l’unité nationale et sa gestion de la crise anglophone et salue la convocation de ce dialogue.” Il condamne l’ingérence des puissances étrangères à travers leur caractère pyromanes, rappellant à ces derniers la volonté légitime du peuple camerounais à sauvegarder l’unité et l’indivisibilité du cameroun. Il saisit l’occasion pour inviter le président de la république à rester ferme face à ce marché de dupe et invite le peuple camerounais à plus de vigilence. Le communiqué confirme le cohésion des camerounais face à l’énemie et exhorte le premier ministre à mobiliser les moyens pour le succès de ce dialogue.

Appellant les camerounais à taire leurs querelles, se pardonner mutuellement afin de mieux s’organiser pour le succès de ce dialogue, il pointe un doigt accusateur aux médias internationaux quant aux manipulations de ces derniers sur des pseudos exactions et respect des droits de l’homme, et appelle les camerounais à rester unis autour du BIR qui joue un rôle majeur dans la sauvegarde de l’unité et l’intégrité », peut on lire dans le rapport. Pour ce qui concerne la vision du parti, le bureau politique appelle les militants à la mobilisation totale tout en veillant à l’amélioration des résultats dans les prochaines échéances électorales. Le bureau politique s’indigne de la manipulation entretenue par certains oiseaux de mauvaise augures qui entretient la confusion dans l’esprit des militants quant à la direction du parti et réaffirme que l’Upc a une seule Direction légale et légitime reconnue par l’état du Cameroun conduite par Robert Bapooh Lipot, pour les résultats engrangés depuis son élection lors du 6ème Congrès du 30 septembre 2012. Dans cette vision, le bureau politique encourage le Robert Bapooh Lipot à ne ménager aucun éffort pour rassembler les militants et sympathisans en se référant aux grandes lignes du 6ème Congrès et surtout le maintient de l’alliance républicaine UPC/RDPC. Le mandat a donc été donné à ce dernier, pour conduire la délégation de l’Upc aux assises du grand dialogue national.

La conférence de presse s’en est suivie a tournée sur le même refrain de l’ordre du jour du bureau politique. La patron de l’upc s’ est apesanti sur les éclairages quand à ceux qui ont mis sur pieds les plans machiaveliques pour faire échouer le grand dialogue national, allant jusqu’au dénoncer la Suisse qu’il estile être un pays qui n’a aucune lecon à donner au cameroun et ne saurait ni être arbitre, ni avoir les moyens de reunir les réprésentants des ambazoniens contre des moyens financiers énormes. Il appelle ainsi les camerounais à barrer la route à ces derniers qui se sont improvisés en médiateurs internationaux avec l’aide des des médias étrangers à la solde de ces officines. Dans cet exercice d’échanges avec les hommes de media, il a réaffirmé son statut de secretaire Général du parti non seulement selon les textes, mais également selon le protocole lors de sa consultation par le premier ministre au sujet du Dialogue national. Le numėro un de L’UPC n’a pas manqué de rappeller la déroute de ceux de ceux dont le programme politique réel se ramenait à l’utilisation de l’élection présidentielle du 07 octobre 2018, comme prétexte pour créer des conditions propices à un soulèvement populaire .

Il a appellé pour sortir à la mobilisation générale des camerounais au dialogue national afin que les grandes decisions souveraines qui seront prises participent au bien du peuple camerounais.

***Oscar Onolo***

<https://lavoixducentre.cm/grand-dialogue-national-et-ingerences-etrangeres-les-mises-en-garde-de-lunion-des-populations-du-cameroun>

1. **République « d’Ambazonie » – Dr. Sako remplace Sisiku en tant que président du gouvernement intérimaire**

Par

[**La Voix du Centre**](https://lavoixducentre.cm/author/lavoixducentre)

 -

1 décembre 2019

***Il a prêté serment le 20 novembre dernier dans l’Etat du Maryland aux Etats-Unis.***

La page de Sisiko Ayuk Tabe en tant que chef du gouvernement intérimaire est peut-être tournée. Il ne sera peut-être plus jamais le leader de la révolution Ambazonia. Les efforts infructueux pour réconcilier sa faction dirigée depuis la prison principale de Kondengui avec celle de la diaspora dirigée par Dr Samuel Sako ont finalement abouti à l’élection de ce dernier à sa place. Pour les partisans du gouvernement intérimaire d’Ambazonie et de la révolution, s’est tenue une cérémonie historique le mercredi 20 novembre dans l’État du Maryland, aux États-Unis. C’était la prestation de serment du tout premier président élu du gouvernement intérimaire d’Ambazonie, en la personne du Dr. Samuel Ikome Sako.

L’élection et l’investiture du Dr Sako sont devenues évidentes après la destitution de l’ancien président désigné, Julius Ayuk Tabe, par le Conseil de la restauration en juin dernier. Les événements menant à ce changement à la tête de l’Interim Government ont débuté mardi 19

novembre dernier avec l’annonce par Elvis Kometa, président du Conseil de la restauration, de l’élection de M. Sako : «Je me présente devant vous aujourd’hui pour vous annoncer de bonnes nouvelles», a déclaré Kometa ce mardi 19 novembre 2019 sur ABC Amba TV : « Le Conseil de la restauration élit un nouveau président pour le gouvernement intérimaire, Son Excellence Samuel Ikome Sako », a annoncé Kometa, qui assume également les fonctions de président du Southern Cameroons National Council (SCNC) pour l’Amérique du Nord. Il a pris le temps d’expliquer pourquoi l’élection était devenue nécessaire. À la suite

de la destitution de Sisiku Ayuk Tabe le 8 juin 2019, a-t-il déclaré, et considérant la promesse du Conseil de la restauration de combler le poste laissé vacant par la mise en accusation, et après la présentation de la candidature du Dr. Sako à l’examen du Conseil de la restauration le 24 août dernier, le Conseil a décidé de voter pour le cabinet du gouvernement intérimaire, a-t-il déclaré.

Citant la constitution du gouvernement provisoire, il a justifié cet exercice de la manière suivante: «En cas d’absence de président par intérim ou d’empêchement du président d’exercer ses pouvoirs pour quelque motif que ce soit, le vice-président  exerce tous les pouvoirs, devoirs et responsabilités conférés au président. Et le vice-président ne pouvant entrer en fonction ou exerçant ses pouvoirs à la place du président, tout citoyen digne d’Ambazonie dûment désigné par le Cabinet et recevant un vote à la majorité simple du Conseil de la restauration réuni en quorum en personne ou virtuellement, exerce tous les pouvoirs, devoirs et responsabilités conférés au vice-président ». Dans ce contexte, le Conseil de restauration, considérant la gravité des circonstances de notre révolution, procède avec beaucoup de prudence, de sagesse et de prévoyance, dans le plus grand intérêt des 8 millions d’Ambazoniens, sachant que le pouvoir législatif du peuple – le Conseil de la restauration, réuni ce jour-là, samedi 16 novembre 2019, dans le cadre de son devoir constitutionnel, a voté en faveur du candidat au Cabinet.

Par cette action, Dr Samuel Ikome Sako est promu président, gouverneur par intérim de la République fédérale d’Ambazonia, à compter de la date de sa prestation de serment. Le Conseil de la restauration habilite le président de la Chambre à convoquer une session conjointe extraordinaire réunissant toutes les institutions compétentes de l’IG, comme le stipule la Constitution provisoire, pour que la cérémonie assermente le nouveau président.  » Cette installation du mercredi 20 novembre a été vue par une crème de fonctionnaires du gouvernement intérimaire, d’éloges et de sympathisants, y compris une poignée du

clergé. Prenant le serment d’office, M. Sako a promis de respecter les principes de gouvernance et de renoncer au pouvoir à temps, sans tentative de formation d’une autre faction de l’IG. Il a également vanté les nombreuses réalisations de ses deux années de présidence en tant que président par intérim, citant notamment l’internationalisation de la lutte, le fait qu’un Ambazonia jusqu’alors inconnu soit désormais un nom connu dans le monde entier et la création d’ABC Amba TV, entre autres réalisations. Il a dit qu’il avait hâte de rencontrer le président Paul Biya, aux côtés de la médiation suisse et de l’indépendance du Sud-Cameroun.

Les critiques qui n’ont pas vu les élections et l’inauguration se présenter ont toutefois mis en doute la nécessité de ce dernier, préférant que Dr Sako aurait tout simplement pu rester Président par intérim ou se réconcilier avec la faction de Sisiko. Cependant, M. Sako a déclaré lors d’un discours prononcé le 22 novembre au peuple d’Ambazonie que son prédécesseur en prison ayant été frappé d’incapacité et mis en accusation, l’action du Conseil ayant voté pour le confirmer au poste de président était nécessaire face à la médiation suisse anticipée.

L’un des coordinateurs des comtés (il en existe 13 dans le Cameroun anglophone), qui répondait mardi 19 novembre dernier  aux questions posées par le secrétaire à la communication Chris Anu sur ABC Amba TV, a déclaré que l’une des raisons pour lesquelles l’installation de M. Sako était arrivée tardivement était due aux efforts de fond que les

dirigeants du comté avaient déployés pour créer l’unité des factions de Sisiku et de Sako. Il a ajouté qu’ils devaient renoncer à la possibilité d’une réconciliation après que Sisiku, à la deuxième réunion de sa faction, ait claqué la porte sans donner de raison et ne plus jamais revenir. Dr. Sako, selon le Conseil de la restauration, a un mandat de deux ans à la suite duquel une nouvelle élection peut être organisée.

***E.E***

<https://lavoixducentre.cm/republique-dambazonie-dr-sako-remplace-sisiku-en-tant-que-president-du-gouvernement-interimaire>

1. Depuis Kondengui, un sécessionniste crache ses 4 vérités à Kamto.

Par

[**La Voix du Centre**](https://lavoixducentre.cm/author/lavoixducentre)

 -

14 février 2020

Head of the Movement for the Rebirth of Cameroon (MRC), Maurice Kamto, 64, poses in Yaounde on August 14, 2018. - Maurice Kamto will run for the next presidential elections taking place on October 7, 2018. (Photo by Reinnier KAZE / AFP)

**Wilfred Tassang prisonnier anglophone et l’un des membres du « consortium anglophone » en 2016, pense que « Maurice Kamto est un piètre menteur, pire que Biya ».**

Wilfried Tassang prisonnier anglophone et proche de Sissuku Ayuk Tabe est très amer envers Maurice Kamto. Dans une tribune qu’il a publié derrière les murs de Kondengui, le leader sécessionniste traite Maurice Kamto de menteur.  *« 48 heures après leur libération de Kondengui, le partenaire et allié du professeur, Albert Dzongang, a déclaré à la télévision que la meilleure chose qui leur soit arrivée en prison était qu’ils avaient établi un rapprochement avec les dirigeants ambazoniens en prison, quoi que cela signifie.
Aurait-il pu y avoir un rapprochement si les deux parties ne se rencontraient pas et ne se parlaient pas ?
N’est-il donc pas très peu formel que Kamto déclare que lui et son équipe n’ont jamais discuté avec les dirigeants ambazoniens en détention ? Pourquoi mentirait-il ? »* se demande-t-il. Wlfried Tassang rappelle parlant de Maurice Kamto que *« le professeur a menti »* et dit aux anglophones de la diaspora *« que cet homme (Kamto) est à éviter comme une puce ».*

Wilfried Tassang précise que *« C’est à la demande et sur l’insistance du professeur (Kamto) qu’une équipe de quatre personnes, dirigée par Sisiku Julius Ayuk Tabe, a rencontré sa propre équipe ».*  et se demande  *« pourquoi l’homme de loi va mentir »* Pour lui,  *« cette action singulière confirme ce que Sisiku lui avait dit, ainsi qu’à ses hommes, plus tôt ; « vous êtes tous comme Paul Biya », c’est-à-dire si quelqu’un en doutait ».*

*Fuyez Maurice Kamto*

De bout en bout, Wilfried Tassang ne laisse pas de repit à Maurice Kamto : *« mon opinion sur les docteurs et les professeurs qui ne peuvent pas défendre la vérité, et surtout quand ils sont professeurs de droit, est qu’ils ne valent pas une pièce d’Amba.
Concernant le Wonderboy du Cameroun (Kamto) je vous dis ambazonien, fuyez-le. Nous n’avons pas réussi à obtenir du président Fru Ndi qu’il soutienne la quête de restauration, comment pensez-vous que nous puissions le faire avec un Kamto ? Cet homme ne nous flatte même pas, il ne pense pas que nous valons la peine de faire de l’humour.
Qu’est-ce que le Kamto attend d’Ambazonie ? Que nous le soutenions pour qu’il détrône Paul Biya afin qu’il puisse, à son tour, consacrer davantage notre servitude, ou si vous préférez,« un statut d’esclave spécial». Si avec leur petite éducation, Ahidjo, et ensuite Paul Biya pouvaient nous réduire à cela, combien de plus ce professeur de droit des plus avisés pourra-t-il accomplir ? Non pas que notre affaire ait des défauts ; il n’y a pas de faille dans la vérité.
La cerise sur le gâteau, l’un des nôtres qui nous a rendu visite en prison ici était prêt à nous dire et en présence de Albert Dzongang, que ce frère et allié politique de Kamto a demandé en direct à la télévision que la junte de Yaoundé nous tue (Sisiku Ayuk Tabe et ses neuf frères étant alors secrètement détenus au SED). Ce n’est pas le genre de personnes avec lesquelles on peut batifoler au nom de la recherche de sympathisants. Bien sûr, nous négocions avec Kamto s’il devient demain le président du Cameroun, mais ne nous leurrons pas ; Kamto sera un adversaire plus redoutable que Paul Biya »*

**Albertine Essomba**

<https://lavoixducentre.cm/depuis-kondengui-un-secessionniste-crache-ses-4-verites-a-kamto>

1. **Guerre des médias – Camus Mimb appelle à la réconciliation**

Par

[**La Voix du Centre**](https://lavoixducentre.cm/author/lavoixducentre)

 -

5 mars 2020

***Le chroniqueur sportif trouve inadmissible la guerre qui couve entre les journalistes de Vision 4 et ceux de la télévision Equinoxe et appelle au cessez-le-feu.***

Le journaliste de Vision 4, Bruno Bidjang a réalisé un reportage mercredi dernier, en réaction à l’exercice de fact checking effectué par Cédrick Noufele au journal de  20h de la télévision Equinoxe TV mardi dernier. Dans ce reportage d’environ 4minutes, Bruno Bidjang, qualifie Equinoxe TV, de *»média réputé proche des terroristes ambazoniens et déstabilisateur »*. Réagissant à cette sortie, Camus Mimb a écrit : *« Comment je vais laisser massacrer un journaliste ou un média sous mes yeux ? Comment je vais accepter voir sans rien dire un affrontement entre médias d’une violence rare sans dire STOP et plaider pour la confraternité ? J’ai suivi presque choqué, la charge de Bruno Bidjang sur Cedric Noufele et Équinoxe, et je trouve cela totalement inadmissible. Pas forcément parce que le contenu est faux, mais pour deux raisons fondamentales : l’élégance de la confraternité, et la défense d’un tiers…À quel moment est-on arrivé à une confrontation entre un journaliste dont le rôle est d’éclairer, expliquer, faire parler tous les acteurs, et les acteurs en question qui sont libres de leurs avis et de leurs positions ? Autant la Crtv est dans son rôle de donner la parole à un expert pour dire ce qu’il pense du rapport d’une ONG…autant Equinoxe a le droit d’enquêter sur le rapport en question, d’en ressortir les points de discorde, même en opposition à un autre média »,* explique-t-il.

*« Mais dites-moi à quel moment ça devient un problème personnel entre un journaliste Cédric Noufele, et un Expert Mathias Eric Owona Nguini? Pourquoi nous sommes arrivés à un tel niveau d’intolérance et de suspicion ? Pourquoi les médias doivent entrer dans cette danse ? »* se demande-t-il. Le promoteur de la radio RSI avoue que *«  J’ai travaillé à Equinoxe…pendant 6 ans. J’étais un cadre de cette maison, j’étais même pour certains, le chouchou du Boss Sévérin Tchounkeu…il y a forcément eu du moins bons comme partout ailleurs, c’est notre cuisine interne. Mais j’étais réputé être un polémiqueur hors pair…et ce n’était pas une consigne ! Je serais de cette époque qu’on m’aurait catégorisé. Et d’ailleurs, notre ton qui tranchait avec la Crtv aura constitué le ciment de notre réputation. Cela ne veut pas dire que nous étions en mission. C’est juste qu’à cette époque, Albert Ledoux Yondjeu Nathalie Wakam Paul Sabin Nana Stephane Moukouri Letamba Antoine Landry Lemogo Carole Yemelong et autres, nous avions des rêves de différences et la fougue de la jeunesse. Nous avions commis des erreurs…blessé de bonne foi des gens…mais jamais parce que c’était une mission, jamais parce que nous en avions après eux…Jamais, on a pensé que parce qu’un média disait autre chose, il fallait l’attaquer. Au contraire, on se remettait en question pour être sûrs de n’avoir pas été planté par une source. Chers confrères, chers jeunes confrères ».* Pour le chroniqueur sportif, les journalistes doivent faire *« les batailles déontologiques qui doivent faire avancer ce métier…ne faisons pas les batailles pour les hommes qui vont nous éloigner de notre métier ».*  Il pense que *« c’est absurde de vouloir opposer Un journaliste comme Noufele à un homme de science comme MEON, simplement parce que les deux n’ont pas les mêmes finalités dans l’exercice de leurs professions respectives »,* et confirme que *« la première télévision qui fait voir l’immense savoir de Mathias Eric Owona Nguini, est Equinoxe à travers le Chef-d’œuvre d’échange avec Babissakana, dans la VÉRITÉ EN FACE avec Valentin Siméon Zinga ».* « Je demande la fin des hostilités, sans prétention d’être l’ONU des médias », conclut-il…

**Albertine Essomba**

<https://lavoixducentre.cm/guerre-des-medias-camus-mimb-appelle-a-la-reconciliation>

1. **Dialogue avec les séparatistes**

Par

[**La Voix du Centre**](https://lavoixducentre.cm/author/lavoixducentre)

 -

6 juillet 2020

**Vers un nouvel échec**

**Alors que les autorités camerounaises et le gouvernement imaginaire  d’Ayuk Tabe ont engagé des discussions dans le but de fixer les modalités d’un cessez-le-feu, les autres leaders anglophones ont déjà signifier qu’ils rejettent cette initiative.**

Les discussions engagées entre les autorités camerounaises et 9 leaders séparatistes emprisonnés depuis 2018, semblent vouées à l’échec. Dès l’annonce de la tenue des assises entre les autorités camerounaises et certains leaders sécessionnistes, les autres leaders anglophones qui ne prennent pas part à ces pourparlers ont rejeté la main tendue de Yaoundé. ***«****Nous avons tous été avertis la nuit dernière que Sesekou et d’autres(anglophones) avaient été sortis de leurs cellules. J’ai immédiatement alerté mon attaché de presse pour qu’il informe notre peuple. Ce matin, j’ai été informé d’une réunion entre Sesekou et son équipe et le régime des bouchers. J’ai immédiatement demandé des éclaircissements à la direction d’IG Care. J’ai eu un briefing complet de Sesekou et du camarade Yerima »,* a écrit Lucas Ayaba Cho, un des leaders opposés à l’initiative. Il ajoute que : *« mon conseil de guerre et mon cabinet se réunissent cette nuit pour examiner le briefing et publieront une déclaration complète demain. Permettez-moi de vous dire ceci. Tout entretien direct non supervisé en LRC avec un régime génocidaire indigne de confiance est dangereux et doit être découragé. Nous avons saigné pendant quatre ans pour internationaliser notre lutte de libération afin de nous permettre de négocier dans des conditions de confiance et de franchise. Notre relation avec l’IG Care est importante pour notre libération et la stabilité post-indépendance. Nous devons cependant être sur la même longueur d’onde stratégique pour traiter des questions internationales cruciales. »*

Chris Anu, porte-parole du gouvernement intérimaire de l’Ambazonie a lui aussi affirmé que *« seulement Samuel Sako, président du gouvernement intérimaire de la “République Fédérale de l’Ambazonie” et une équipe désignée peuvent parler de l’Amabazonie. Les prisonniers ne négocient pas pour libérer les gens. Ainsi toute la gymnastique de Yaoundé est nulle »,*a-t-il martelé sur tweeter.

L’appel de l’Onu

Au mois de mars dernier, le secrétaire général de l’ONU, Antonio Guterres, avait appelé à un cessez-le-feu dans le monde. Selon le 18e rapport sur*« la situation en Afrique centrale et les activités du Bureau régional des Nations unies pour l’Afrique centrale »,*seule l’APLM-Socadef, une des milices acquises à la cause séparatiste a répondu favorablement à cet appel. Dans l’ensemble, les combats se sont intensifiés entre les forces de défense camerounaise et les rebelles ambazoniens. Avec cette nouvelle étape, Yaoundé essaye donc d’obtenir que les autres groupes armés en activité dans les régions anglophones acceptent de faire taire les armes. Mais au regard de ce qui se vit dès l’annonce de ces assises, il est difficile d’affirmer que ces négociations aboutiront à un arrêt des hostilités.

Terriane Ngono

<https://lavoixducentre.cm/dialogue-avec-les-separatistes>

1. **Désertion dans les rangs – 226 soldats décampent**

Par

[**La Voix du Centre**](https://lavoixducentre.cm/author/lavoixducentre)

 -

14 décembre 2020

**Le nombre sans cesse croissant des militaires morts au front dans les régions anglophones serait le motif d’un ras- le- bol  manifesté par leur fuite de l’armée.**

La frustration et l’inconfiance au sujet d’une guerre sans espoir du moindre achèvement auraient  poussé un groupe d’hommes en tenue à prendre la poudre d’escampette. Dans la liste des déserteurs les éléments du corps des sapeurs-pompiers, les gendarmes et militaires outrés par les tueries quasi quotidiennes de leurs camarades dans les feux de cette guerre qui paralyse  les localités du Nord-ouest et du Sud-Ouest  depuis bientôt cinq ans sont introuvables. À l’honneur et fidélité ils ont opté pour le libre arbitre en désertant du service militaire. Portés disparus de tous les radars leurs noms circulent au sein du haut commandement.

**Les signes d’un malaise profond**

Même si la grande muette sert d’apologie du silence et de la réserve ses secrets bien que masqués par les étouffements débordent ses usages et exposent à la fin le vrai visage des tensions  en interne. La désertion des 226 éléments témoignent visiblement du mauvais vent qui souffle dans l’armée.  Les morts en masse des militaires au front dans le Noso, les handicapes  graves subis par les soldats mitraillés, les actions militaires prolongées au champ de bataille et la dépression observée chez les uns et les autres auraient sans doute inspiré ces hommes en tenue à jeter les armes et les camouflets. Il n’est non plus exagéré de faire mention des traitements peu humains que subissent les soldats de rang dans la répartition de leurs droits. En l’occurrence leurs primes de guerre font l’objet de la hantise de la hiérarchie militaire au moment de la donation. Si ces soldats ne perçoivent pas leurs droits en monnaie de singe ils font  face à une interminable attente de ces sommes auxquelles le bénéfice dépend de l’humeur d’un chef le plus souvent exigeant la part du lion or les soldats de rang sont en avant-poste de la guerre. Le tribalisme n’épargne pas les forces de défense. Les considérations ethno  tribales s’emparent des rangs et tendent à propager la marginalisation entre les éléments coptés à leur tour par des supérieures originaires des différentes régions et qui montrent la préférence d’un tel combattant à un autre non pas pour les prouesses militaires mais plutôt qu’il appartiendrait à une tribu quelconque.

**Les risques d’une désertion en masse**

Leur abandon du service militaire interpelle le politique à une gestion plus efficace de la crise en zone anglophone. Les dangers d’une désertion des autres frères d’armes ne doivent être minimisés. Toutefois le prolongement de la guerre et l’absence du dialogue entre les belligérants vont sans doute multiplier les victimes militaires de cette guerre qu’Achille Mbembé qualifie de « guerre inutile». Au-delà de la désertion la réalité traduit l’échec du gouvernement dans les démarches visant à résoudre la crise dans le Noso. La sensibilité a tout son sens dans un cadre où l’on entretient une guerre fratricide en essayant de commissionner les militaires contre leurs compatriotes. En plus les  manœuvres de la bourgeoisie militaire sapent le moral des soldats et incitent parfois au non-respect de l’autorité conséquence des meurtres perpétrés par les subalternes contre des chefs militaires véreux. «  On ne vous dit pas la vérité. Les réalités sur le terrain dans les régions du Nord- Ouest et Sud- Ouest sont atroces. Nous souffrons au combat. Nous mourons au combat. J’ai perdu plusieurs de mes camarades de promotion. Pour venir à Yaoundé passé deux ou trois jours je suis obligé de commissionner une fille pour qu’elle envoie mes équipements à l’agence parce que au moindre soupçon les ambazoniens nous tuent. C’est nous qui mourons au combat. Et le plus grave,  nos chefs nous torturent. Nous avons plusieurs primes lorsqu’on est en guerre. Mais nous sommes maltraités pour avoir cela et le plus souvent nous n’avons même pas cet argent qui nous revient de droit ». Déplore un jeune soldat de retour à Bamenda pour un bref séjour dans une ville du pays. A cet imbroglio s’ajoutent les cas des soldats indisciplinés  pour qui le respect de la hiérarchie n’a plus de valeur. Mais aussi la méfiance entre camarades  a fait son nid dans les troupes. Entre poursuivre une «  guerre inutile » et s’enfuir loin du commandement les compagnons perdent l’honneur de se confier les autres aux autres au risque de se heurter aux intentions voilées. « On ne sait plus qui est qui. Tu peux te confier à un camarade espion. Nous vivons la guerre du plus profond de nos âmes, loin de nos familles, loin de tout ». Renchérit cet adjudant d’un groupe d’élite. En quatre ans  la guerre  dans les régions du Nord- Ouest et du Sud-Ouest a fait plus de 5000 victimes civiles et militaires et environ 7000 déplacés**.**

**William Omer Tchuisseu**

<https://lavoixducentre.cm/desertion-dans-les-rangs-226-soldats-decampent>

1. **Cameroun – « Les anglephones » cibles de la police camerounaise dans la ville de Yaoundé**

Par

[**La Voix du Centre**](https://lavoixducentre.cm/author/lavoixducentre)

 -

30 septembre 2017

Le 30 septembre 2017 la police et la gendarmerie ont procédé à de nombreuses fouilles et arrestations dans la ville de Yaoundé (Biyemassi, Melen, Obili, Briqueterie, Centre administratif et Etoug-Ebe). Des secteurs de la ville occupés majoritairement par les ressortissants de la région du Nord-ouest et du Sud-Ouest. Des citoyens anglophones ont été pris à partie et humiliés par les forces de l’ordre. Les plus ciblés sont de jeunes hommes anglophones qui ont été battus et accusés de complicité avec les sécessionnistes. Contrains par les forces de l’ordre à passer aveux sous intimidations d’appartenir à ce groupe.

L’une des victimes relate «je vis à Yaoundé depuis plus de 3 ans, et je suis étudiant dans une école de la place. Etre traité de la sorte juste parce que je suis anglophone me fait mal, est-ce un crime de l’être?».

Quels sont les réalités quotidiennes que traversent ces personnes originaires des régions du Nord-ouest et du Sud-ouest depuis le début de la crise sécuritaire dans ces zones ?

                                                                          Amayeneh Massia Thérèse Fernanda

<https://lavoixducentre.cm/cameroun_les-anglephones-cibles-de-la-police-camerounaise-dans-la-ville-de-yaounde>

1. **Cameroun- les populations du Noso contraintes de s’exiler**

Par

[**La Voix du Centre**](https://lavoixducentre.cm/author/lavoixducentre)

 -

22 septembre 2017

Au cours des manifestations  pacifiques de ce 22 septembre 2017 qui ont eu lieu dans les localités du Nord-ouest et Sud- Ouest les populations forcées de quitter leurs racines par crainte de représailles policières.

Ils ont bravé la décision des autorités qui interdisent toute manifestation pacifique ces hommes, femmes et enfants de Bamenda et Buéa. Venues des villes et des localités éloignées, les populations anglophones ont organisé une marche pacifique dans les capitales des deux régions. Leurs ambitions portent sur un système à deux états fédérés qui selon eux serait la mesure idoine pour le développement et la croissance économique de leurs deux régions.

À leurs actes pacifiques les forces de l’ordre ont promis « d’ effacer ceux qui osent s’opposer à la décision du pouvoir central. La zone sera nettoyée». Un jargon militaire pour le moins proche des dictatures les plus féroces. La nouvelle n’a pas manqué de faire peur à tous ceux et celles qui ont participé à la marche. Plusieurs ont décidé de vider les lieux.

Bien des alternatives s’ouvrent à leur obligation de quitter malgré eux leurs différents villages. Si d’aucuns ont fait le choix de prendre la route du Nigeria voisin d’autres par contre ont décidé de gagner les villes de Douala, Bafoussam, Yaoundé ou encore la région du Moungo.

Avec ou sans connaissance dans leur destination les fugitifs de la guerre dans le Noso sont contraints de fuir les représailles des forces de l’ordre. La disparité des familles s’annonce comme un fléau grave dans les années à venir.

**Anne Marie Odibioyekené**

<https://lavoixducentre.cm/cameroun-les-populations-du-noso-contraintes-de-sexiler>

1. **Les réalités du champ de bataille dans la crise anglophone**

Par

[**La Voix du Centre**](https://lavoixducentre.cm/author/lavoixducentre)

 -

15 juin 2017

Qui est donc le responsable de l’incendie de certaines écoles, enlèvement et prise d’otages, morts? Les nouvelles recrues de l’armée sur le champ de bataille affirment nos sources.

Une source qui préfère resté anonyme pour des raisons de sécurité nous fait part de certains faits. D’après elle le gouvernement Camerounais serait entrain de perdre la guerre sur le front contre les sécessionnistes et aurait pris d’autres mesures pour vaincre l’ADF, Red Dragons et tout autre groupe sécessionniste dans les régions du Nord-Ouest et Sud-Ouest.

Cette source nous informe que certains militaires et individus sont payés pour commettre et masquer des crimes afin de faire porter le chapeau aux Amazoniens.

Des cas d’enlèvements commandités par les autorités, des écoles incendiés, et même de la mort de certains militaires sur le front notamment les nouvelles recrues, des crimes de guerres comme répression abusive sur les populations, ordre de tirer sur des civiles non armés lors des fouilles parce qu’elles sont soupçonnées de collaborer avec les terroristes et non pas l’armée de ce fait ils seront donc traités comme des terroristes.

Quel est donc le but finale de cette stratégie de guerre qui met en péril au quotidien les vies de nombreux innocents Camerounais dans les Régions du Nord-Ouest et Sud-Ouest?

D’après certains séparatistes le but recherché est de dresser les populations anglophones locale (majoritairement acquise à la cause indépendantiste) et la communauté internationale contre les indépendantistes armés.

Et aussi d’amener les USA à classer les mouvements indépendantistes anglophones comme organisation terroriste.

Et si la résistance persiste à ne pas laisser les armes quel sera la prochaine stratégie ?.

**Amayeneh Massia T. F**

<https://lavoixducentre.cm/les-realites-du-champ-de-bataille-dans-la-crise-anglophone>

1. **Cameroun- l’opération “ ville morte” vire au drame à Bamenda**

Par

[**La Voix du Centre**](https://lavoixducentre.cm/author/lavoixducentre)

 -

9 décembre 2016

Alors que les populations ont respecté le mot d’ordre lancé par un groupe de mécontents  qui appelle de n’exercer aucune activité  ce jour les forces de police se sont livrées à une opération de violences sur les civils non armés.

La journée du 9 décembre 2016 sera retenue dans les esprits comme étant une autre période noire au Cameroun. En effet, les manifestants pacifiques ont été la cible des policiers pourtant ces derniers sillonnaient les rues de la capitale de la région du Nord-ouest pour dénoncer pacifiquement la marginalisation dont sont victimes les anglophones. Malheureusement leurs actions innocentes ont croisé la colère des hommes en tenue épris de barbarie.

Trois morts, une vingtaine de personnes conduites vers des lieux Inconnus, l’utilisation  des gaz lacrymogènes ainsi que des blessés graves sont enregistrés au cours du ratissage des policiers sur le terrain. Plusieurs témoins déclarent avoir vu des camions des forces de police pénétrer les quartiers de la ville et de ramener par forces les civils dans leurs engins. Le Social Democratic Front ( Sdf) principal parti de l’opposition qui a pour base électorale les régions anglophones regrettent que les forces du maintien de l’ordre aient utilisé « les balles réelles pour tirer sur les manifestants sans défense»,  peut – on lire dans son communiqué.

Mais du côté des autorités camerounaises l’on évoque «  la conspiration des forces du mal qui visent à salir l’image du pays et celle des forces de défense».

Les manifestants dénoncent la corruption, la mal gouvernance, la marginalisation dont ils sont victimes au quotidien sur les plans du droit, de la justice voire de la non-  valorisation de la langue anglaise.

**Anne Marie Odibioyekené**

<https://lavoixducentre.cm/cameroun-loperation-ville-morte-vire-au-drame-a-bamenda>

1. **Crise sécessionniste : Le gouvernement répond à Amnesty International**

Par

[**Jean Claude Kendeg**](https://lavoixducentre.cm/author/jckendeg)

 -

14 juin 2018

***Suite à la publication du rapport de l’Ong Amnesty International sur la crise sécessionniste, le gouvernement à travers son porte-parole a fait une réplique par un point de presse condamnant l’Ong. Ci-dessous le discours intégral du ministre de la communication****.*

Mesdames, Messieurs les Journalistes,
En avance de 24 heures sur la date initialement annoncée, l’ONG Amnesty International vient une fois de plus de publier un rapport à charge contre le Cameroun et son Armée, dans le cadre de la situation sécuritaire qui prévaut dans les régions du Nord-ouest et du Sud-ouest.
Comme dans le précédent rapport 2016-2017, l’édition 2017-2018 du rapport d’Amnesty International est entachée de grossiers mensonges, de déductions hâtives, de manœuvres diffamatoires inadmissibles, qui s’inscrivent dans une stratégie de harcèlement et de déstabilisation de notre pays dans la lutte qu’il mène contre le péril terroriste.
Le Gouvernement de la République rejette avec la plus grande fermeté ce prétendu rapport qui, sous le prétexte de la protection des droits humains, ne constitue qu’un tissu d’approximations et d’allégations mensongères.
La raison en est que la situation sur le terrain est aux antipodes de ce que décrit Amnesty International. De fait, dans ces deux régions de notre pays, des bandes terroristes se réclamant des mouvements sécessionnistes et bénéficiant d’importants soutiens à l’étranger, ont décidé de répondre à l’offre de dialogue faite par le Chef de l’État par la violence, le crime, la destruction de biens et d’édifices publics, les enlèvements suivis d’assassinats et de demandes de rançons, et par toutes autres formes d’actes barbares préjudiciables à la paix et la sécurité des populations.
Face à cette situation, l’État n’avait plus pour seul recours qu’une réaction appropriée, en vertu de ses devoirs régaliens de préservation de l’intégrité territoriale de la nation, de préservation de la paix civile et de protection des populations et de leurs biens.
S’agissant du contenu de ce prétendu rapport, je voudrais m’appesantir à titre d’illustration, sur un cas qui étale au grand jour la mauvaise foi manifeste de nos procureurs de circonstance. Selon Amnesty International en effet, les Forces de Défense et de Sécurité du Cameroun se sont rendues coupables de graves exactions dont les unes, pour ne prendre que celles-là, ont visé les populations civiles de la localité de DADI dans la région du Sud-ouest.
Or, ce qui s’est réellement déroulé dans cette localité et qui ne pouvait échapper à aucun observateur, c’est que les populations de DADI avaient été prises en otage par des bandes de terroristes qui les avaient réduits à l’esclavage pendant plusieurs jours et installé leur base sur ces lieux.
Les Forces de Défense et de Sécurité, informées de la situation, sont intervenues pour libérer ces populations et les rétablir dans leurs droits légitimes à vivre en paix et à vaquer à leurs occupations.
Au lieu d’en rendre compte de la sorte, Amnesty International a préféré endosser avec une consternante légèreté, des accusations dénuées de tout fondement, en cautionnant des actes criminels auxquels les auteurs de son rapport 2017-2018 tentent paradoxalement de conférer crédit et légitimité.
En agissant ainsi, Amnesty International a pris la responsabilité de compromettre par elle-même tout le crédit dont elle aurait pu jouir en tant qu’une organisation mondialement connue.
La caricature plusieurs fois mentionnée de dangereux criminels présentés comme de manifestants pacifiques faisant face à mains nus à la répression des Forces Armées, est tout simplement déconcertante lorsque l’on sait, ne serait-ce qu’à travers les images diffusées par les terroristes eux-mêmes, qu’il s’agit de bandes armées pourvues d’engins de guerre, y compris de lance-roquettes.
De la même façon, comment comprendre que la mise à sac d’établissements scolaires, les incendies de dortoirs hébergeant de jeunes enfants sans défense ou encore les prises à partie et les voies de faits physiques exercés sur des écoliers, soient considérées comme de simples actes et tactiques de désobéissance civile.
On peut aussi s’interroger sur la méthodologie utilisée par les auteurs de ce pseudo rapport, pour aboutir à des conclusions aussi aberrantes que celles qui nous sont livrées ici, quand on sait que de son propre aveu, Amnesty international aurait interviewé une centaine de d’individus dont-on ignore totalement l’identité ainsi que le niveau de représentativité sur le terrain.
Il y a donc fort à penser qu’il ne s’agit là que de recoupements sans doute crées de toute pièce, en s’alliant des collaborations douteuses en vue de réaliser des collectes de données orientées, alors qu’en matière d’enquête scientifique crédible pour le cas d’espèce, ce sont les éléments factuels qui crédibilisent un résultat et non l’inverse.
Amnesty International évoque aussi des prises de vue satellitaires qui montrent des villages brûlés et saccagés. Mais encore faudrait-il démontrer par qui ces violences ont été perpétrées. Les Forces de Défense disposent quant à elles de preuves irréfutables montrant que des forfaits commis par les terroristes sont ensuite instrumentalisées pour faire croire le contraire, tentant ainsi de transformer les bourreaux en victimes.
Ce n’est pas la première fois qu’Amnesty International se fourvoie de la sorte dans sa méthodologie et l’interprétation de différents constats qu’elle est amenée à faire concernant ses enquêtes sur le Cameroun.
Ce dont il est sûr, c’est que de telles distorsions méthodologiques et des déductions approximatives de ce genre amènent à n’accorder aucun crédit aux conclusions d’un tel ce pseudo-rapport.
Le Cameroun prend à témoin l’opinion nationale et internationale de ces manœuvres de désinformation sans doute opérées dans un but de déstabilisation, mais qui ne sauraient prospérer face à un peuple uni et soudé autour de Son Chef, le Président de la République Son Excellence Paul BIYA.
Par ailleurs, et qu’on le comprenne bien, le Cameroun n’attend pas d’être instruit par qui que ce soit de l’extérieur pour prendre ses responsabilités lorsque des faits d’exactions sont avérés, et dont des membres des Forces de Défense et de Sécurité seraient les auteurs, pour sanctionner sévèrement de tels écarts de comportement. Il s’agit donc de bien comprendre que les exactions ne sont pas la norme de nos Forces de Défense ou leur marque déposée.
Cela dit, peut-on admettre qu’une armée régulière soit de cette façon, mise sur le même pied d’égalité que des bandes criminelles et terroristes ? Une armée régulière, se trouvant dans une situation de droit et de devoir de défense de l’intégrité territoriale et de protection des populations et de leurs biens, peut-elle être mise en balance avec une horde de terroristes sanguinaires qui violent, brûlent, arnaquent, et font passer leurs forfaits au compte de prétendues exactions commises par l’armée ?
Une telle attitude ne renseignerait-t-elle pas sur le fait que nous sommes bel et bien en présence d’un non-sens flagrant et d’une véritable conspiration ?
Cela suffira en tout cas à éclairer tout observateur sur le projet de stigmatisation et de diabolisation de nos Forces de Défense et de Sécurité par nos pourfendeurs.
Nulle part au monde en effet, il n’est admissible de laisser prospérer, sous l’œil des autorités légitimes, des enlèvements avec demande de rançon, des rackets et des viols, des pillages et des assassinats, des blasphèmes de symboles et d’emblèmes de la République, en un mot, de laisser triompher toute cette funeste panoplie digne d’un syndicat du crime et d’une hostilité ostensiblement dirigée contre une patrie.
Et comme panacée à de tels travers dans lesquels ne saurait se complaire aucune société civilisée, Amnesty International propose la rengaine du dialogue, comme si nous en ignorions l’intérêt ou les vertus.
Le dialogue, soit… Mais alors, de quoi pourrions-nous dialoguer ? De la partition d’un territoire dont l’unité a été durement conquise à travers de longues luttes et d’âpres conciliations depuis plus d’un siècle, et que nous ont léguée les pères fondateurs de la nation?
Le dialogue, soit… Mais alors, avec qui faudrait-il dialoguer ? Avec des bandes de terroristes dont le seul dessein est de faire sécession, de désintégrer la nation et de surcroit, en semant la mort et la désolation au mépris de toutes les valeurs fondamentales de la République et au détriment d’innocentes populations civiles ?
Nulle part au monde, cela n’est envisageable.
En tout état de cause, le Chef de l’État, Chef des Armées et derrière lui, la nation tout entière, réitèrent leur soutien et renouvellent leurs félicitations à nos Forces de Défense et de Sécurité pour leur sens de l’honneur, leur courage, leur patriotisme, leur abnégation, et leur professionnalisme dans l’exécution des missions qui leurs sont confiées.
Au nom du Gouvernement, je voudrais rassurer l’ensemble de nos populations que la situation dans les Régions du Nord-Ouest et du Sud-ouest reste suivie pour un retour rapide à la normale.
Au demeurant, je saisis la présente occasion pour informer l’opinion publique nationale et internationale que le Président de la République, Son Excellence Paul Biya, vient d’instruire la mise en œuvre d’un plan national de solidarité à l’endroit de nos compatriotes des régions concernées.
À cet effet, dans les tout prochains jours, une mission gouvernementale ira à la rencontre de nos compatriotes réfugiés au Nigeria afin de créer des conditions de leur retour dans leurs localités respectives.
Je vous remercie de votre aimable attention.

<https://lavoixducentre.cm/crise-secessionniste-le-gouvernement-repond-a-amnesty-international>

1. **Une célébration ensanglantée**

Par

[**La Voix du Centre**](https://lavoixducentre.cm/author/lavoixducentre)

 -

26 mai 2018

*C’est entre tuerie et enlèvement que s’est célébrée la 46e édition de la fête de l’unité nationale dans les régions anglophones du Cameroun.*

Le bilan s’est alourdi ce dimanche 20 mai 2018 dans les régions anglophones après une série d’attaques perpétrées par les présumés sécessionnistes. Au moins trois morts et six blessés au sein des forces de sécurité et de défense d’après le site d’information journalducameroun. Les assaillants ont attaqué la ville d’Ekona, département du Fako, dans la région du Sud-ouest aux environs de 5h30. Des présumés sécessionnistes ont pris d’assaut le poste de police de cette localité. Pendant ces affrontements, on a enregistré la mort de l’officier Moulong Azang, qui a été blessé pendant des heurts et a succombé à ses blessures. Deux militaires ont également été blessés. Du côté du commandement central du groupement mobile d’intervention de la police (CCGMI), on a enregistré un blessé, lors d’un accident causé par l’huile de moteur versée en route par les assaillants alors qu’ils avaient été envoyés en renfort à Ekona. D’autres attaques ont visé ce même jour, le poste de l’armée à Nkongle, Konye, Andek dans le Nord-ouest, le poste de péage de Banga Bakundu et la brigade de gendarmerie de Tinto. Pendant ces attaques, deux soldats ont été tués et trois blessés.

A Banguem dans le département du Kupe et Manengouba dans le Sud-ouest, le maire de la ville et son adjoint ont été enlevés. Une vidéo qui a été publiée par les séparatistes a circulé sur les réseaux sociaux montrant le maire et son adjoint. Du côté de Kumbo et Buéa, les populations ont célébré la 46e fête de l’Unité nationale en mode « ville morte ». Ici, l’effervescence des célébrations n’est pas partagée.

Rappelons que depuisuis le mois d’octobre dernier, ces villes ont été le théâtre des affrontements entre les éléments des forces de défense et de sécurité camerounaises et les groupes armés sécessionnistes.  Selon les sources officielles, près d’une quarantaine de soldats et environ 120 civils ont déjà été tués lors des affrontements dans les régions anglophones du Cameroun. L’Organisation des Nations Unies parle de 160.000 personnes déplacées depuis le début de la crise.

**MG**

1. **Crise Anglophone : Une marche de paix prévue à Bamenda, Buea et Yaoundé en juillet**

Par

[**Jean Claude Kendeg**](https://lavoixducentre.cm/author/jckendeg)

 -

26 juin 2018

**Dans le but de ramener paix, sécurité et réconfort dans ces deux parties du Cameroun, l’Association des Parents et Jumeaux pour la Paix et la Solidarité dans le monde prévoit organisé une marche en juillet 2018.**

De plus en plus, au fil du temps, la crise anglophone tourne au vinaigre. Des morts, des enlèvements, des incendies des déplacements sont au rendez-vous dans ces deux régions depuis plus de deux ans déjà. Psychose, désespoir et traumatisme sont là les notions qui règnent au Nord-Ouest et au Sud-Ouest. Toutes les populations qui y vivent ne savent plus à quel saint se vouer.

Et pour faire renaitre un espoir, l’Association des Parents et Jumeaux pour la paix et la Sécurité dans le Monde, qui a la base est une association œuvrant dans la paix à travers la médiation dans les conflits,  le maintien de la paix, prévoit organisé une marche qui aura lieu premièrement à Buea suivi de la ville de  Bamenda et puis à Yaoundé. Présider par son Secrétaire Permanent Pierre Tsopgni, la marche est une initiative qui a pour objectif la promotion des actes de solidarité en mettant en place une plateforme d’assistance aux personnes en difficultés en situation de guerre.

**Jean-Claude Kendeg**

<https://lavoixducentre.cm/crise-anglophone-une-marche-de-paix-prevue-a-bamenda-buea-et-yaounde-en-juillet>

1. **Crise Anglophone : 12,7 milliards de Fcfa pour un plan d’urgence humanitaire**

Par

[**Jean Claude Kendeg**](https://lavoixducentre.cm/author/jckendeg)

 -

21 juin 2018

Suite à l’aggravation de la crise anglophone dans le Nord et le Sud-Ouest, le président de la République a mis en place un plan d’urgence humanitaire pour une extinction totale de la crise. Ledit plan a été présenté le mercredi 20 juin 2018 par le chef de gouvernement Philémon Yang, qui était accompagné à l’occasion des membres du gouvernement.

La situation dans ces deux parties du pays est très alarmante. Jadis, ceux-là qui se font appeler sécessionnistes posaient des actes de violence qui donnaient une psychose aux populations. Ces populations, se sont déplacées dans les pays voisins pour cause d’actes de barbaries. Cette situation est devenue de plus en plus grave dans le sens où ces dits séparatistes ont fait des enlèvements qui ont s’en sont suivis par des meurtres. Les sécessionnistes sont encore allés plus loin, en décapitant un enseignant tout en le mettant dans une marmite pour une cuisson.
Dans le but de ramener la paix, la sérénité et la tranquillité dans ces zones, le président de la République Paul Biya a pour la circonstance mis en place un plan d’urgence humanitaire pour les deux régions. Ce plan permettra de: rétablir un cadre de vie propice à l’épanouissement et au développement des communautés affectées par la situation sociopolitique dans le Nord et le Sud-Ouest ; apporter une assistance humanitaire d’urgence aux populations en détresse ; assurer la réinsertion socio-économique des populations et enfin promouvoir la cohésion sociale et le vivre ensemble tout en rétablissant les infrastructures qui ont été détruites. Et pour cela, le gouvernement devra implémenter son action dans les domaines de l’accès au logement, la fourniture des denrées alimentaires et des produits de nécessités, l’éducation, le logement, la protection et la reconstitution des documents individuels. Il a à cet effet appelé les ministères en charge de l’économie, de la sécurité, de l’agriculture, des finances, et bien d’autres à se mettre en action pour que les objectifs du plan soient atteints. Hormis ces institutions gouvernementales, les organisations non-gouvernementales feront aussi partie intégrante des acteurs majeurs.
Tout étant compris, ce plan humanitaire coûtera plus 12 milliards de Fcfa. Cette somme sera assurée par le budget de l’état, les appels à la solidarité par les levées de fonds et les partenaires internationaux. Mais pour un bref délai de trois mois, une somme de 10 milliards de Fcfa est nécessaire pour les denrées alimentaires, les abris, l’eau, l’hygiène et l’assainissement, le renforcement de la sécurité, la réhabilitation des infrastructures sociales de base, la reconstruction du tissu économique, la protection et la planification des actions de développement.

***Jean-Claude Kendeg***

<https://lavoixducentre.cm/crise-anglophone-127-milliards-de-francs-cfa-pour-un-plan-durgence-humanitaire>

1. **Conférence générale anglophone / Reportée du 21 au 22 novembre prochain**

Par

[**kristel**](https://lavoixducentre.cm/author/kristel)

 -

14 août 2018

La décision a été prise par toutes les parties prenantes anglophones du Nord-Ouest et Sud-Ouest au cours d’une réunion tenue le 8 aout dernier.

Le 8 aout dernier, les organisateurs de la conférence générale Anglophone (AGC) se sont réunis à Douala dans le but d’identifier les mesures à prendre en vue de la réussite de cet évènement. Après avoir passé en revue les diverses tâches à accomplir en préparation de ladite conférence et veiller à ce que ce grand rassemblement atteigne ses objectifs, ils ont conclu à l’unanimité que « plus de temps serait nécessaire pour préparer la conférence », raison pour laquelle elle a été repoussée du 21 au 22 novembre prochain initialement prévue pour les 29 et 30 aout.

D’après le communiqué signé du Cardinal Christian Tumi, le gouvernement prendra également part à cette importante assise, car il a répondu favorable à l’initiative, tout en exprimant des réserves sur certaines demandes qui lui avaient été adressées. Les organisateurs ont également noté l’enthousiasme avec lequel les camerounais de tout bord ont accueilli la nouvelle de la tenue de cette conférence. C’est dans cette optique que ces derniers ont « réaffirmé leur détermination à poursuivre, en tant que serviteurs de Dieu politiquement neutres et soucieux uniquement du bien-être du peuple », l’objectif visé étant « de jeter les bases d’une solution pacifique et durable à la crise anglophone et à un retour à la normale ».

Pour ce faire, les organisateurs de cette conférence invitent les habitants des régions du Nord-ouest et du Sud-ouest à continuer leurs préparatifs, où qu’ils se trouvent en vue de leur participation effective à ladite conférence. Ils appellent également tous les Camerounais à rester dans la prière au quotidien, en invoquant le tout-puissant pour la réussite de ce grand rassemblement et pour un retour à la paix dans les deux régions anglophones.

**Christelle Nkolo**

<https://lavoixducentre.cm/conference-generale-anglophone-reportee-du-21-au-22-novembre-prochain>

1. **Crise anglophone : La controverse se poursuit autour de la conférence des anglophones**

Par

[**Jean Claude Kendeg**](https://lavoixducentre.cm/author/jckendeg)

 -

7 août 2018

***Christian Tumi, archevêque émérite de Douala et certains leaders ont pris l’initiative d’organiser les 29 et 30 août à Buea, une conférence réunissant les anglophones du Sud-ouest et du Nord-ouest, en vue de rechercher des solutions à la crise sociopolitique qui secoue les deux régions depuis octobre 2016.***

Les autorités camerounaises qui apprécient la démarche ont fait savoir qu’il n’est pas judicieux de poser les préalables à l’Etat lors d’une telle concertation. *« Le dialogue, OUI. Mais il ne faudrait pas que le remède soit pire que la maladie. Le gouvernement reste ouvert à toutes les initiatives »,* souligne Issa Tchiroma Bakary, le ministre de la Communication et porte-parole du gouvernement.

Le gouvernement rejette en effet les préalables posés par les religieux. Ces préalables concernent la libération des commanditaires et des individus qui ont pris les armes contre les institutions, perpétré des assassinats, brûlé des écoles… Les leaders religieux suggèrent également le retrait des troupes gouvernementales dans les deux régions. Ce à quoi s’oppose Yaoundé. *« Sans la présence de ces forces, ces terroristes auraient tout détruit, ils auraient hissé leur drapeau partout où ils en auraient convenance. Et perpétré davantage d’exactions »* ajoute M. Issa Tchiroma Bakary. Autre préalable, la libération des personnes incarcérées dans le cadre de cette crise dont certaines sont reconnues coupables par la justice.
Pour Yaoundé, on ne pose pas des préalables à un Etat de droit. L’impunité indique que le gouvernement, n’est pas la règle.

**Réaction de l’opposition**
L’opposition camerounaise dans sa globalité encourage la tenue de cette concertation.
Pour le Cameroon People’s Party (CPP), cette conférence est une bonne chose dans la mesure où elle traduit une volonté de dialoguer en vue de contribuer à une résolution de la profonde crise qui s’est aujourd’hui transformée en guerre civile dans les régions du Nord-Ouest et du Sud-Ouest.

***Armand Ougock***

<https://lavoixducentre.cm/crise-anglophone-la-controverse-se-poursuit-autour-de-la-conference-des-anglophones>

1. **Paroisse Marie Médiatrice d’Etoudi : L’Abbé Otu console les victimes de la crise anglophone**

Par

[**Jean Claude Kendeg**](https://lavoixducentre.cm/author/jckendeg)

 -

5 août 2018

***En raison des actes terroristes et de barbarie que vivent les habitants des régions du Nord et du Sud-Ouest, l’Abbé Otu Ntolo Recteur du sanctuaire-paroisse Marie Médiatrice d’Etoudi a organisé une messe de prière et consolation le vendredi 03 aout 2018.***

C’est dans le livre de Jérémie chapitre 26 versets 1-9 que le prélat a tiré la leçon du jour. Parlant de la mauvaise vie que vivaient le peuple d’Israël en ce temps, l’Eternel Dieu tout puissant avait à cet effet appelé le prophète Jérémie à parler en son nom. « Ainsi parle l’Eternel : si vous ne m’écoutez pas quand je vous ordonne de suivre ma loi que j’ai mise devant vous, d’écouter les paroles de mes serviteurs, les prophètes, que je vous envoie, que je vous ai envoyés dès le matin, et que vous n’avez pas d’écoute, alors je traiterai cette maison comme Silo, et je ferai de cette ville un objet de malédiction pour toutes les nations de la terre ». C’est parce que aujourd’hui selon l’Abbé Otu les hommes se sont tournés vers le mal comme ce peuple évoqué dans le livre de Jérémie que de tels choses arrivent. A cause des troubles présents dans le Nord et le sud-Ouest, les victimes se comptent en milliers. Certains sont sanglantes et d’autres non sanglantes. Et comme aujourd’hui les Hommes ont fermés leurs oreilles a la parole de Dieu, Dieu de son côté a aussi détourné son visage de son peuple. Alors malheur et désolation lui arrive aujourd’hui. Et pour que L’Eternel retourne son visage vers son peuple ; ce peuple doit suivre ses lois sans état d’âmes. Car dans ces deux régions il y a déjà coulé beaucoup de sang. Et il faut que cela cesse.
Bien qu’il existe encore des actes terroristes et barbares dans ces régions, l’Abbé Otu accompagné de ses fidèles ont demandés au Seigneur tout Puissant de consoler les victimes et de leurs donner courage, espoir pour que ceux-ci puissent affronter le futur car la vie est parsemée de joie, de troubles et tristesses.
Hormis ce temps consacré aux victimes de la crise anglophone, c’était aussi le lieu pour le Recteur de la paroisse de faire des prières de guérison aux malades présents ce jour.
***Jean-Claude Kendeg***

<https://lavoixducentre.cm/paroisse-marie-mediatrice-detoudi-labbe-otu-console-les-victimes-de-la-crise-anglophone>

1. **Sortie de crise anglophone – L’église catholique et le gouvernement en désaccord**

Par

[**La Voix du Centre**](https://lavoixducentre.cm/author/lavoixducentre)

 -

31 juillet 2018

Le ministre de la Communication en porte-parole en chef du Gouvernement

Si l’objectif  visé à terme est partagé par les deux parties à savoir le retour à la paix dans les régions du Sud-ouest et du Nord-ouest, la question sur la libération des personnes incarcérées dans cette crise divise les chefs religieux et le gouvernement camerounais.

Le 25 juillet dernier, Christian Tumi et les chefs religieux de plusieurs obédiences étaient réunis dans la ville de Douala, capitale économique du pays.  Au centre de cette rencontre,  les pistes de solution pour la sortie de crise dans les deux régions anglophones du pays victimes d’une crise depuis deux années. Pour y débattre, le cardinal était entouré du révérend Babila George Fochang de l’église presbytérienne du Cameroun, de l’imam Tukur Mohammed Adamu de la mosquée centrale de Bamenda dans la région du Nord-ouest et de l’imam Alhadji Mohammed Aboubakar de la mosquée centrale de Buea dans le Sud-ouest. Les échanges ont conduit à la convocation d’une conférence générale des anglophones qui se tiendra du 29 au 30 août prochain dans la ville de Buea.

Cette décision de rassembler ne déplait à personne et même les propositions de déposer les armes par les rebelles et le retour des réfugiés ont été saluées car « la recherche commune d’une paix définitive et durable au problème anglophone et à la crise anglophone au Cameroun » est l’objectif visé. Seulement, la tâche d’huile qui apparait dans cette liste de propositions ou d’exigences prises ce 25 juillet et qui déplait au gouvernement est celle de « libérer toutes les personnes incarcérées dans le cadre de cette crise ». Ayant fait grand échos les heures qui ont suivi le communiqué de cette rencontre, le porte-parole du gouvernement est revenu sur ce point le 27 juillet lors de l’édition du journal de 20h30 sur la télévision nationale. Dès la première question à lui adressée sur le plateau, la position du gouvernement est claire : « Au nom du gouvernement j’aimerais dire que toute initiative, d’où qu’elle vienne, pourvu qu’elle contribue à consolider et restaurer la paix sur l’ensemble du territoire, là où cette dernière serait menacée, toute initiative qui concourt  à consolider l’héritage que les pères fondateurs de notre nation nous ont légué est la bienvenue. En revanche, je voudrais marquer un étonnement qui consiste à dire qu’on ne peut pas se permettre de placer sur un même piédestal l’armée républicaine dont la mission régalienne est la protection des frontières de notre nation, de l’ordre républicain, des hommes et de leurs biens  qui aujourd’hui se déploie pour la protection de l’intégrité territoriale  que les bandes armées, les terroristes qui tuent, égorgent, décapitent et brulent des écoles et commettent un crime imprescriptible qui consiste à empêcher aux jeunes camerounais , aux enfants d’acquérir le savoir indispensable pour la gouvernance de notre nation.  Le gouvernement ne peut donc pas comprendre, encore moins accepter qu’on mette au même niveau l’armée républicaine et ces sécessionnistes terroristes qui utilisent des armes. On ne peut pas également demander à un Etat de droit de libérer ceux qui ont tué, massacré et qui se trouvent aujourd’hui arrêtés et qui, quoi qu’il arrive parce que nous sommes dans un Etat de droit ils seront traduits devant les tribunaux pour répondre de leurs forfaits », a fermement déclaré le ministre de la Communication, en sa qualité de porte-parole du gouvernement. La conférence de Buea se veut cependant ouverte à toute personne dont les ancêtres sont issus des treize départements qui composent les deux régions anglophones du Cameroun et de ceux dont les ancêtres s’y sont installés permanemment avant 1961.

Marie-France Ibel

<https://lavoixducentre.cm/sortie-de-crise-anglophone-leglise-catholique-et-le-gouvernement-en-desaccord>

1. **Crise anglophone / Religion et jeunesse comme solution de fin de crise**

Par

[**kristel**](https://lavoixducentre.cm/author/kristel)

 -

28 août 2018

Le 23 août dernier à Yaoundé, les membres du clergé regroupant chrétiens, musulmans et juifs se sont réunis pour trouver des solutions de sortie de crise qui sévit dans les régions du Nord-ouest et du Sud-ouest, sous l’initiative du Révérend Père Pascal Biyiha Bassong, fondateur supérieur général de la communauté Missionnaire Saint Paul.

*« Il est question que la religion et la jeunesse marche ensemble pour mettre un terme à ce fléau dévastateur »*, a déclaré le révérend Père Charly Stéphane Mbong Etoundi, prêtre de Jésus-Christ et missionnaire saint Paul à l’entame de son exposé. Et tous les membres du clergé présents à cette conférence partageaient le même avis, ce qui a d’ailleurs fait l’objet du thème central de cette rencontre, «*religion et jeunesse : une solution face à la crise anglophone »*. Ainsi, cette conférence œcuménique qui rassemblait chrétiens, musulmans et juifs le 23 août dernier à Yaoundé, avait pour objectif principal, *« la préservation de la paix et de la stabilité au Cameroun en général et dans les régions du Nord-ouest et du Sud-ouest en particulier »*. Le but ici étant de sensibiliser la jeunesse, les leaders religieux et des dirigeants camerounais, *« à l’effet de l’amener à ne céder ni à l’intox, ni à la manipulation, ni à l’instrumentalisation dans la crise sociale, qui secoue les deux régions anglophones de notre pays depuis près de deux ans »*. La jeunesse étant la cible principale de cette sensibilisation socio-spirituelle car, *« elle est démographiquement majoritaire, porteur d’espoir et capable de dire non à la violence et à la haine entre frères et sœurs »*.

**Esquisses de solutions**

D’après Rabbi Ismaël Amir Serges Etele, Rabbin des communautés juives au Cameroun et en Afrique centrale, *« Dieu nous a mis face au problème anglophone, nous qui sommes Camerounais. Cela signifie que nous avons un lien avec ce problème, nous avons contribué à le provoquer, nous devons maintenant travailler à y apporter une solution. Et Comment ? chacun en corrigeant sa conduite : du policier au magistrat, de l’enseignant à l’homme des médias, du médecin au législateur, du fonctionnaire au chef d’entreprise, de l’écolier à l’artiste, de l’ouvrier au commerçant, du politicien au religieux et la jeunesse constitue l’essentiel de ces catégories »*. Ce dernier propose en outre quelques solutions qui peuvent mettre un terme à ce problème anglophone. Pour ce qui est de la religion, *« elle doit jouer un rôle actif dans la remise en place des valeurs et des idéaux dans la société ; elle doit s’occuper de la construction morale, sociale même civique de la jeunesse en plus de l’éducation religieuse ; les leaders religieux eux-mêmes doivent incarner les valeurs qu’ils enseignent et de cette manière ils pourront inspirer la jeunesse désorientée sans repère au lieu de continuer de l’égarer »*. Quant à la jeunesse, *« elle devrait s’éloigner de la convoitise, car c’est un défaut qui occasionne plusieurs autres vices ; elle doit aussi se rendre compte de son rôle important dans la société et comprendre qu’une société est à l’image de sa jeunesse ; les jeunes doivent également s’éloigner de ce qui les incite à la violence et s’attacher aux personnes qui vont les inspirer pour le bien, ils doivent respecter les institutions nationales car tout pouvoir vient de Dieu ; ils doivent travailler et cesser de croire que le gouvernement peut tout faire pour eux et faire des publications responsables, instructives et apaisantes sur les réseaux sociaux ».*  S’agissant de  l’Etat, il pense qu’il doit se soucier de la jeunesse, car « on ne la laisse pas à la merci de toutes les idéologies ambiantes on leur inculque celles qu’on aimerait qu’ils aient en fonction donc de l’orientation que nous voulons donner à notre société ».

Pour le révérend père Pascal Biyiha Bassong, *« il faudrait organiser un triduum national, de réconciliation entre le peuple camerounais et Dieu et le peuple camerounais lui-même »*. Pour lui, seule la prière aidera le Cameroun à sortir de cette crise. Parlant au nom de toute la communauté missionnaire Saint-Paul, le révérend père déclare que, *« nous voulons descendre dans la zone anglophone pour travailler avec le clergé local, la jeunesse locale, pour vivre avec eux et partager avec eux leurs douleurs, prier avec cette jeunesse éduquer cette jeunesse et si possible trouver des solutions pacifiques, ce qu’il nous faut c’est l’onction et le parrainage de l’Etat ».*

Rappelons que cette conférence organisée par la communauté missionnaire de Saint-Paul, sous l’initiative du révérend père Pascal Biyiha Bassong a été parrainé par le premier Ministre, représenté pour la circonstance par le ministre de la Jeunesse et de l’Education civique, Mounouna Foutsou.

**Christelle Nkolo**

<https://lavoixducentre.cm/crise-anglophone-religion-et-jeunesse-comme-solution-de-fin-de-crise>

1. **Crise anglophone – La main tendue de Paul Biya aux sécessionnistes**

Par

[**La Voix du Centre**](https://lavoixducentre.cm/author/lavoixducentre)

 -

19 décembre 2018

*Le chef de l’Etat vient de demander avec action immédiate, la libération de 289 personnes détenues dans le cadre des remous dans le Nord-ouest et le Sud-ouest,une mesure qui n’est pas sans susciter des polémiques.*

Après la création du Comité national de désarmement, de démobilisation et de réintégration (CNDDR), le président de la République, Paul Biya, vient de prendre un acte fort en vue de sortie de crise dans les régions du Nord-Ouest et du Sud-ouest. Mais celui-ci n’a pas laissé indifférents certains de ses compatriotes dont les opinions restent partagées. Si pour certains la libération de 289 personnes pourra influer positivement sur la crise anglophone, pour d’autres il faut mieux que cela, c’est-à-dire aller plus en mettant en liberté les véritables meneurs de cette rébellion qui a déjà fait plusieurs morts dans la partie d’expression anglaise du pays et des dégâts matériels très importants.

Au demeurant, c’est toujours lorsqu’on les camerounais s’attendent le moins que le chef de l’Etat, Paul Biya, prend des actes forts, comme il l’a fait une fois de plus en tendant la main aux sécessionnistes et autres fauteurs de troubles. Ainsi on peut lire dans un communiqué signé du ministre, secrétaire général à la présidence de la République, Ferdinand Ngoh Ngoh, le 13 décembre dernier, que le président de la République a décidé «*de l’arrêt de poursuites pendantes devant les tribunaux militaires contre un certain nombre de personnes arrêtées  pour délits commis dans le cadre de la crise dans les régions du Nord-Ouest et du Sud-ouest. Deux cent quatre vingt neuf (289) détenus au total sont concernés par cette décision qui sera mise en œuvre à la diligence du ministre délégué à la présidence chargé de la Défense.*»

Comme indique le même communiqué, cette mesure qui intervient après la création du Comité national de désarmement, de démobilisation et de réintégration (CNDDR), vise à amener les Camerounais des deux régions du pays cités plus haut, qui sont empêtrés dans la violence, à renoncer à celle-ci pour« *revenir dans la droit chemin* », afin de pouvoir de nouveau participer à la grande œuvre de construction nationale.  «*Le chef d’Etat réaffirme ainsi sa détermination à poursuivre sans relâche ses efforts dans la recherche et moyens d’une résolution pacifique de la crise qui affecte les régions de notre pays, en vue de la normalisation souhaitée par l’immense majorité du peuple camerounais*», dixit le SG/PRC.

 Ainsi donc pour traduire en actes cette décision présidentielle, le ministre délégué à la présidence en charge de la Défense, Joseph Beti Assomo a pris toutes les mesures qui s’imposaient afin que des audiences spéciales se tiennent effectivement dans les juridictions de Bafoussam, Bamenda, Buéa, Douala et Yaoundé, ce 14 décembre, aux fins de libération de ces 289 détenus. Ces mises en liberté viennent donner plus de crédibilité au propos du président de la République qui, le 30 janvier 2013 face aux journalistes devant le perron de l’Elysée disait que : «*Notre souci c’est qu’il ait le maximum de gens libres.»*Au demeurant cet acte de magnanimité du  chef de l’Etat qui concourt au retour à la paix dans la zone anglophone engluée dans une crise sécuritaire depuis octobre 2016 est salué à juste titre par des Camerounais épris de paix et mus par l’intérêt supérieur de la nation.

***Jean Marie Biongolo***

<https://lavoixducentre.cm/crise-anglophone-la-main-tendue-de-paul-biya-aux-secessionnistes>

1. **Crise anglophone – Le lourd tribut des populations civiles**

Par

[**La Voix du Centre**](https://lavoixducentre.cm/author/lavoixducentre)

 -

3 décembre 2018

*Celles-ci sont les principales victimes de ce conflit qui ne cesse de s’enliser. Nombre d’entre elles, désormais sans repère, affrontent l’adversité pour se faire une nouvelle vie.*

Meurtres, déplacements forcés, destructions de biens, les populations civiles ne savent plus à quel saint se vouer pour se soustraire à cette situation qui ne cesse de s’aggraver au fil de jours dans la zone anglophone du Cameroun. Plusieurs cas d’abus, conséquence plausible des escarmouches à répétition entre les sécessionnistes et les forces de sécurité et de l’ordre continuent d’alimenter la grande actualité dans ce pays. L’on s’apitoie particulièrement sur le sort des personnes qui s’étant saignées sur les quatre veines pour se construire des fortunes et des familles, se trouvent seules au monde, après avoir tout perdu. A l’épouvante générale par exemple, une chaîne de télévision locale a diffusé, il y a quelques jours, une émission-documentaire fort émouvante où l’histoire d’une dame était relatée. Nommée Anne Marie Odibioyekene, cette Camerounaise s’était retrouvée du jour au lendemain, sans époux, sans enfants et sans maison.

 D’après les commentaires faits par les journalistes, cette femme originaire de la zone francophone du pays, s’était installée depuis plusieurs années dans un village du département de la Mémé, dans la région du Sud-ouest, l’une de deux régions frondeuses. En couple avec un jeune Camerounais, également d’expression anglophone, ceux-ci avaient fait des enfants et étaient parvenus, grâce à sa force de poignet en s’adonnant à l’élevage et la culture des produits vivriers, à se constituer une petite fortune. Et ce couple faisait du coup partie de la petite bourgeoisie locale. Tout basculera ce jour où le ciel tomba sur cette Camerounais, lorsqu’elle vit sa famille prise à partie par une horde de sécessionnistes. Elle vit ses enfants et son époux s’écrouler sous les coups de fusil et tous ses biens détruits.

 Cette mère de famille n’aura la vie sauve que grâce à un subterfuge. Elle s’était fait passer pour une personne morte. Désormais, sans repère, désemparée, désorientée, elle aurait pris, avec le soutien de certains amis, pour lui éviter de vivre dans la hantise et dans le choc perpétuel, le chemin d’Europe. Comment s’en sort-elle outre-Atlantique, mystère ! Mais toujours est-il que, compte tenu de l’actualité dans le vieux continent, rien n’assure que sa vie est un long fleuve tranquille. Cette dame n’est pas la seule victime, elles sont des milliers qui pour fuir la mort se trouvent éparses dans le monde, sans nouvelles de leurs proches et leur famille. Si les personnes qui ont choisir de trouver exile au Nigéria bénéficient pour la majorité de l’attention du gouvernement camerounais, il n’en est pas de même pour les autres qui restent sans traces malheureusement.

**Théâtre d’affrontements**

A la vérité personne ne peut aujourd’hui, pour peu qu’on est habité d’un esprit patriotique, se glorifier de tout ce qui se passe dans la zone camerounaise d’expression anglaise, qui englobe les régions du Nord-Ouest et le Sud-ouest. Deux régions qui sont le théâtre d’affrontements entre des manifestants et les forces de sécurité et de l’ordre depuis plus de deux ans. Toutefois, si l’on est en droit de condamner les actes barbares et barbants des insurgés, qui de la formulation de certaines revendications à connotation corporative en sont arrivés à réclamer la sécession, il faut reconnaître que quelques actions ou actes de nos gouvernants ont porté des germes ou alors de ferments de cette crise, dite anglophone. Et d’autres parmi eux ont contribué à mettre le feu aux poudres. On se rappelle des sorties médiatiques à caractère péremptoire, assorties d’oukases,  du ministre d’Etat, ministre de la Justice, Garde des Sceaux, Laurent Esso.  Au lieu de militer pour le retour au calme dans la zone anglophone,  l’entreprise martiale de ce membre du gouvernement avait alors fait monter d’une octave cette crise.

On sait par exemple que la  dramatisation de cette crise n’a rien de spontané et la revendication, par sa tonalité, sa densité et son entêtement, participe d’un mouvement général d’irruption des particularismes géopolitiques, géoculturels et sociolinguistiques. Le président de la République est particulièrement accusé d’accorder peu d’attention à la particularité des régions du Sud-ouest et du Nord-Ouest. Les jeunes anglophones ont, à tort ou à raison, le sentiment d’être traités comme des citoyens de seconde zone, de se voir barrer l’accès aux grandes écoles,  aux emplois. Ils s’affirment sous-représentés dans la vie politique et regrettent la faible place de l’anglais dans la vie nationale. Aujourd’hui plusieurs familles, dont les membres sont innocents, essuient les conséquences dramatiques de cette crise qui prend encore et encore des proportions.

***Emmanuel Ekouli***

<https://lavoixducentre.cm/crise-anglophone-le-lourd-tribut-des-populations-civiles>

1. **Crise sociopolitique -Paul Biya s’adresse à la nation demain à 20h**

[**mercedes**](https://lavoixducentre.cm/author/mercedes)

 -

9 septembre 2019

Annoncé pour la semaine dernière, c’est finalement demain 10 septembre que le chef de l’État va s’adresser à la nation. Paul Biya sera face à ses compatriotes dès 20h. Un discours qui intervient trois années après le début de la crise qui sévit dans les régions du Nord-ouest et Sud-ouest, au lendemain de la condamnation des leaders séparatistes, et du renvoi de l’audience des prisonniers dits politiques du Mouvement pour la Renaissance du Cameroun. Il faut noter que c’est depuis 2008 (au lendemain des émeutes de la faim) que Paul Biya ne s’est pas adressé à ses compatriotes en dehors des dates classiques.

**Marie-France Ibel**

<https://lavoixducentre.cm/crise-sociopolitique-paul-biya-sadresse-a-la-nation-demain-a-20h>

1. **Paul Biya ordonne la libération de 333 détenus liés à la crise anglophone en plein grand dialogue national**

Par

[**La Voix du Centre**](https://lavoixducentre.cm/author/lavoixducentre)

 -

3 octobre 2019

**Le président camerounais Paul Biya a ordonné jeudi l’abandon des poursuites contre 333 détenus et leur libération dans le cadre du conflit séparatiste des zones anglophones, a indiqué jeudi le Premier ministre.**

“Le Président de la République a demandé la libération de plus de 330 personnes qui ont été arrêtées à cause des troubles que nous connaissons dans le Nord-Ouest et le Sud-Ouest”, a déclaré le chef du gouvernement, Joseph Dion Ngute, à la tribune du Grand dialogue national sur la crise anglophone, qu’il préside à Yaoundé. “Le président de la République (…) a décidé, ce jour, de l’arrêt des poursuites pendantes devant les tribunaux militaires contre certaines personnes arrêtées et détenues pour des délits commis dans le cadre de la crise dans les régions du Nord-Ouest et du Sud-Ouest”, lit-on également dans un communiqué de la présidence qui parle de “333 personnes concernées”.

Cette annonce est “une mesure d’apaisement” que M. Biya “a voulue pendant que nous continuons nos travaux”, a précisé M. Ngute, applaudi debout par la plus grande partie des centaines de participants au Grand dialogue qui doit s’achever vendredi. Cette assemblée avait été convoquée il y a deux semaines par M. Biya, 86 ans dont près de 37 au pouvoir, pour tenter de mettre un terme au conflit entre des groupes armés indépendantistes de la minorité anglophone et l’armée, qui a fait plus de 3.000 morts en deux ans, selon les ONG.

**AFP**

<https://lavoixducentre.cm/paul-biya-ordonne-la-liberation-de-333-detenus-lies-a-la-crise-anglophone-en-plein-grand-dialogue-national>

1. **Calvaire des jeunes filles déplacées du NOSO a Bonaberi – Le cri de cœur du REFAC**

Par

[**La Voix du Centre**](https://lavoixducentre.cm/author/lavoixducentre)

 -

28 septembre 2019

***Informé de cette situation par les média, le réseau des femmes actives de l’Afrique centrale (REFAC), a réagit à travers des mesures urgentes et salutaires.***

Après avoir réinstallé le bureau de l’antenne REFAC du Littoral le 27 septembre 2019, Jeanne Danielle Nlaté, Présidente fondatrice et son bataillon ont tenu à exécuter ce programme de causeries éducatives, de réarmement moral en faveur des milliers de jeunes filles déplacées des régions du Nord-Ouest et Sud-Ouest en proie à une guerre avec les forces gouvernementales . Plusieurs phases ont meublé cette initiative avec au programme un atelier de sensibilisation sur les MST/VIH sida et éducation sexuelle des filles  par Madame BAZO,  assistée par l’association PROMO HEALTH qui a supervisionnée le dépistage du VIH SIDA. Toujours dans ce menu, une séance de physio-psycho émotionnel, énergétique et neuro éducatif a été menée par Mme Ngwal. La séance de réarmement moral a été pilotée par M. Chelem de Partnership et Danielle Nlaté, Présidente fondatrice du REFAC.

Toutes ces activités se sont déroulées en présence des autorités et forces vives de la Région. Dans le souci de pérenniser cette initiative, un groupe de travail a été mis en place pour pérenniser l’action entreprise pour leur insertion. Le sens de ces initiatives se résume dans l’éclairage de la présidente fondatrice du REFAC que résume que *«Nous avons été informées de cette situation par les médias que des milliers de jeunes filles abandonnées vivent dans des conditions inacceptables, exposées aux phénomènes de la prostitution, et cette situation n’est pas d’ailleurs de leur faute. Nous avons donc alerté les autorités à savoir la DGSN, le ministère des affaires sociales et les partenaires nationaux et internationaux pour alerter le maximum de personnes afin d’encadrer ces jeunes filles pour qu’elles soient autonomes. Vous avez vu ici présents des spécialistes de divers domaines, et nous saluons cet engouement ».* Cet élan de solidarité ne se limitera pas à cette initiative, car *«Nous souhaitons avec l’aide des pouvoirs publics qu’un centre de transit soit crée à Douala et que celui-ci soit un centre de veille. Il est important de ressortir les talents de ces derniers car tout cela participe de la paix»,* a-t-elle souhaitée. Quant à la suite de cette initiative, «Nous comptons agir tous les mois avec l’aide de l’OMS, de l’UNICEF, de Plan International avec l’appui et le soutien de nos institutions», a-t-elle poursuivie. L’ampleur du phénomène a poussé les responsables du REFAC à revisiter la tranche d’âge qui devra bénéficier de cet accompagnement.

Rappelons que le REFAC mène des activités agro pastorales et de secteurs divers. Ce réseau  crée à Douala en 2007, œuvre pour la lutte contre la pauvreté en fraternisant les femmes de la sous région Afrique centrale, quelque soient leurs activités, pour un développement durable.  L’objectif est de favoriser l’intégration sous régionale avec en prime la prévention des conflits, de la paix, et le renforcement de la sécurité, le développement humain et la bonne gouvernance.

***Oscar Onolo***

1. **Crise Anglophone – Un présumé financier dans le viseur du gouvernement**

Par

[**La Voix du Centre**](https://lavoixducentre.cm/author/lavoixducentre)

 -

5 décembre 2019

***Derick Stephane Salang serait l’un des financiers de la crise.***

Le gouvernement serait tombé sur une multitude de bordereaux de versement qui démontrent les traces de financements du jeune camerounais. Se fiant sur ces documents, les forces de sécurité camerounaise aurait mis tout en œuvre afin de capturer ce dernier. Au dernier nouvelles, il serait aperçu du côté du Nigeria en pleine réunion avec ses Compères. Egalement, Derick Stéphane avant cela a rejoint l’Italie en 2012 où il a été recruté dans une entreprise de la place et se servirait de son salaire pour nourrir les exactions qui sévissent dans les deux régions du Nord-Ouest et du Sud-Ouest. Avec les financements récurrents, le jeune homme âgé de 24 ans et originaire de la région du Nord-Ouest est accusé d’avoir financé les « Ambaboys » pendant un bon bout de temps.
Mais, après que les forces de sécurité ont découvert les traces des transactions de ce dernier, une interruption brute est observé depuis. Le jeune Derick a arrêté de financer les groupes séparatistes. Cette situation aurait courroucé les sécessionnistes qui veulent en découdre avec lui. Menaces de mort, messages d’intimidations tout y passe. Les alliés de Derick Stéphane Salang veulent en découdre avec lui et son prêt à tout pour l’avoir. Outre cet état de chose, le père géniteur de Derick serait menacé tous les jours non pas seulement à cause de l’interruption de financement de son fils aux séparatistes, mais aussi à cause de son appartenance au parti au pouvoir. Chasser à gauche pour les séparatistes et à droite par les forces de sécurité, Derick Stéphane Salang ne sait quel chemin prendre. Etant actuellement en Europe, ce jeune ayant la volonté de venir au Cameroun craint d’être arrêté.

Les preuves qui accablent le jeune camerounais

Pour rappel, la crise anglophone a débuté il y a 3 ans déjà. Commençant par les revendications corporatistes, cette crise s’est embrassé par la montée en puissance des groupes qui prônent la séparation du Cameroun. Bien qu’ayant tenu le grand dialogue national dans le but de mette en terme à la crise, il n’en demeure pas moins que les deux régions restent toujours desserte.

***JCK***

<https://lavoixducentre.cm/crise-anglophone-le-gouvernement-dans-le-viseur-dun-presume-financier>

1. **Crise sécuritaire dans le NOSO – 130 déplacés sous le toit d’une âme de bonne volonté à Douala lancent un S.O.S**

Par

[**La Voix du Centre**](https://lavoixducentre.cm/author/lavoixducentre)

 -

18 janvier 2020

***La situation a  ému tout le monde. Elle a été présentée  au grand public mercredi dernier au journal de 20 heures sur la chaine de télévision Equinoxe. Ces fugitives  de la guerre sont  des femmes. Etouffées dans une maison, les filles et les mères connaissent la douleur au quotidien***

Ce sont au total 130 réfugiés qui vivent dans une habitation à Douala. Toutes des femmes, elles ont trouvé un abri depuis plus d’un an au domicile d’un homme à Makèpè. Elles se sont enfuies et abandonnées  leurs conjoints suite aux violences qui perdurent dans les zones anglophones  du pays.

Ces femmes se livrent aux  petits métiers pour joindre les deux bouts, une tache qui ne rend pas  leur journée facile. Dans le même temps, quelques – une d’entre elles  ont trouvé la mort dans leur peine, tandis que  certaines sont encore en souffrance dans les hôpitaux.

 Dans sa déclaration face au reporter, Joseph Mofor le responsable du domicile qui accueille les femmes dit avoir transmis aux autorités le cri de ces dernières mais en vain. Jusqu’à ce jour rien n’est fait,  ces victimes de la guerre  ne cessent de traverser les  pires moments de leur vie dans la capitale économique. Cependant à leur misère s’ajoute la non – scolarisation de leurs enfants, absents des écoles faute de moyens financiers. Leur cas rappelle et interpelle les acteurs sur les réalités de la crise qui secoue les régions du Nord-Ouest et du Sud-Ouest du Cameroun.

**William Omer Tchuisseu**

<https://lavoixducentre.cm/crise-securitaire-dans-le-noso-130-deplaces-sous-le-toit-dune-ame-de-bonne-volonte-a-douala-lancent-un-s-o-s>

1. **Cameroun : 10 éléments du BIR tués**

Par

[**La Voix du Centre**](https://lavoixducentre.cm/author/lavoixducentre)

 -

13 janvier 2020

***Ces  éléments du Bataillon d’Intervention Rapide (BIR) ont été abattus dans une attaque des sécessionnistes vendredi 10 janvier à Bambalang dans la région du Nord – Ouest***

Le groupe de militaires a été pris d’assaut par les séparatistes armés. Ces forces de défense se sont installées  dans la localité de Bambalang, en vue de sécuriser ce lieu qui sera le théâtre du défilé du 11 février prochain.  Devant leur station de surveillance, ils ont subi la violence des « amba boys ».  D’après un membre du gouvernement virtuel de l’Ambazonie, cette évasion  a été  menée pour boycotter la fête de la jeunesse. Cet autre drame survenu dans cette partie du pays, traduit l’état d’insécurité qui prévaut dans les deux régions en crise. Pour l’instant, Aucun communiqué des autorités de Yaoundé n’a fait écho de cette situation.

**William Omer Tchuisseu**

<https://lavoixducentre.cm/cameroun-10-elements-du-bir-tues>

1. **Cameroun – Crise Anglophone – Un Chef rebelle capitule**

Par

[**La Voix du Centre**](https://lavoixducentre.cm/author/lavoixducentre)

 -

17 février 2020

**Kingsley Atabongafak qui passe pour être le commandant en second de Field Marshall dans le département du Lebialem a décidé de déposer les armes.**

Ce milicien a changé son fusil d’épaule trois semaines après la mort du *«***général Chacha »** abattu par l’armée camerounaise dans le Bui au Nord-Ouest. Après avoir pris sa décision, le sécessionniste s’est rendu de lui-même au camps Bataillon d’Intervention Rapide BIR. Ces victoires qu’engrange l’armée camerounaise sur le terrain découle d’un important déploiement d’éléments dans les foyers du conflit. La crise socio-politique qui secoue le Noso depuis pratiquement 3 ans a déjà fait des milliers de morts et de déplacés.

**Manguelle Moualal II**

<https://lavoixducentre.cm/cameroun-crise-anglophone-un-chef-rebelle-capitule>

1. **Cameroun – Crise politique/droits de l’Homme – Réponse du ministère de l’Europe et des affaires étrangères à une question écrite à l’Assemblée nationale (Paris, 28/01/2020)**

Par

[**La Voix du Centre**](https://lavoixducentre.cm/author/lavoixducentre)

 -

30 janvier 2020

La France est profondément préoccupée par la situation dans les régions Nord-Ouest et Sud-Ouest du Cameroun, qui continue à se dégrader. Elle condamne fermement les violences et les graves violations des droits de l’Homme dans ces régions. Le 10 septembre dernier, le président Paul Biya a annoncé la convocation d’un grand dialogue national, qui s’est tenu du 30 septembre au 4 octobre. Plusieurs recommandations ont été émises, notamment en matière de décentralisation. Elles ont été soumises au président Biya, qui s’est engagé à travailler à leur mise en œuvre. Les 3 et 4 octobre, les autorités camerounaises ont également annoncé l’arrêt des poursuites pendantes devant les tribunaux militaires contre M. Maurice Kamto et 101 sympathisants du MRC, ainsi que contre 333 personnes arrêtées et détenues pour des délits commis dans le cadre de la crise dans les régions du Nord-Ouest et du Sud-Ouest.

La France souhaite que ces gestes d’apaisement ouvrent la voie à une résolution pacifique de la crise. Elle demeure convaincue que l’issue ne peut être que politique et qu’elle suppose notamment la poursuite d’un dialogue inclusif, y compris avec l’opposition, et l’approfondissement de la décentralisation.

Avec d’autres partenaires internationaux, la France, attachée à la stabilité et à l’unité du Cameroun, se tient prête à soutenir tout processus de dialogue mis en place à cet effet. Elle rappelle également l’importance pour l’opposition de pouvoir s’exprimer librement, en conformité avec la loi, et participer sans entrave aux élections municipales et législatives de 2020. Ainsi que l’expriment les conclusions du Conseil affaires étrangères du 14 octobre 2019, cette position est partagée par l’ensemble des membres de l’Union européenne. Ce message a également été porté par le ministre de l’Europe et des affaires étrangères lors de son déplacement au Cameroun les 23 et 24 octobre 2019, au cours duquel il s’est entretenu avec le président Biya et a rencontré les responsables des partis politiques représentés au Parlement, ainsi que des acteurs du Grand dialogue national. Il a par ailleurs fait part de la disponibilité de la France à apporter son soutien aux autorités camerounaises pour l’approfondissement de la décentralisation et la mise en place d’un statut spécial dans les régions Nord-Ouest et Sud-Ouest./.

(Source : site Internet de l’Assemblée nationale)

<https://lavoixducentre.cm/cameroun-crise-politique-droits-de-lhomme-reponse-du-ministere-de-leurope-et-des-affaires-etrangeres-a-une-question-ecrite-a-lassemblee-nationale-paris-28-01-2020>

1. **Crise anglophone, un soldat aux arrêts après avoir tué un présumé séparatiste**

Par

[**La Voix du Centre**](https://lavoixducentre.cm/author/lavoixducentre)

 -

21 février 2020

**Le ministère de la Défense veut montrer patte blanche suite aux accusations d’assassinat qui pèsent sur les militaires.**

Dans un communiqué lu à la radio nationale ce 19 février, le ministre délégué à la présidence de la République chargé de la Défense, dénonce une bavure militaire. Alors qu’une patrouille traquait un groupe de sécessionnistes, un véhicule avec à son bord deux hommes dont un blessé a pris le large.  Direction, le Saint Mary Catholic Hospital de Mankon à Bamenda dans le Nord-Ouest.

 Les forces de défense se sont lancées à la traque du véhicule. La voiture va tenter de se planquer dans le parking dudit hôpital. Un militaire ouvre le feu sur les présumés séparatistes et le conducteur est mortellement atteint. Le soldat auteur des coups de feu a été mis aux arrêts à la compagnie de gendarmerie de Bamenda selon le communiqué.

**Luigina Monok**

<https://lavoixducentre.cm/crise-anglophone-un-soldat-aux-arrets-apres-avoir-tue-un-presume-separatiste>

1. **Massacres de Ngarbuh – Le secrétaire général des Nations Unies inquiet**

Par

[**La Voix du Centre**](https://lavoixducentre.cm/author/lavoixducentre)

 -

19 février 2020

***Antonio Guterres a dit son inquiétude face à la situation du Nord-Ouest et Sud-Ouest et a demandé l’ouverture d’une enquête indépendante.***

Le Secrétaire général de l’Organisation des Nations Unies (ONU), Antonio Guterres est très inquiet de la situation dans le Nord-Ouest et Sud-Ouest. Face à meurtre de plusieurs civils le 14 février dernier, dans le village de Ngarbuh dans la région du Nord-Ouest du Cameroun, Antonio Guterres a  présenté ses condoléances les plus sincères aux familles des victimes, et a appellé le Gouvernement du Cameroun à ouvrir une enquête et à prendre les dispositions nécessaires pour que les coupables répondent de leurs actes.

En plus de cela, le « secrétaire général a appelé les parties armées à s’abstenir de toute attaque contre les civils et à respecter le droit humanitaire international et des droits de l’homme. Il a ensuite indiqué que les Nations Unies sont disponibles à travailler avec toutes les parties prenantes en vue d’une solution politique à la crise dans les régions du Nord-Ouest et du Sud-Ouest du Cameroun par le dialogue.

**Albertine Essomba**

<https://lavoixducentre.cm/massacres-de-ngarbuh-le-secretaire-general-des-nations-unies-inquiet>

1. **Massacre au village Ngarbuh – Le gouvernement contre attaque**

Par

[**La Voix du Centre**](https://lavoixducentre.cm/author/lavoixducentre)

 -

18 février 2020

***Le ministre de la communication René Emmanuel Sadi a fait une sortie ce 18 février 2020 à Yaoundé, à l’effet de botter en touche les allégations mensongères portées à l’endroit des forces nationales de défense et de sécurité du Cameroun.***

Faisant suite à l’assassinat ***«présumé»*** de près d’une vingtaine de personnes y compris des enfants le 15 février dernier au village Ngarbuh, arrondissement de Ndu, département du Douga-Mantung dans la Région du Nord-ouest, le porte parole du gouvernement est monté ce jour au créneau. Pour lui, comme pour son homologue délégué à la présidence chargé de la défense (Joseph Beti Assomo qui a pondu un communiqué le 17 février dernier), les forces de défense sont accusés en faux, et tiens a*« formellement démenti ces allégations outrancières et mensongères et restitués les faits, tels qu’ils ressortent d’un recoupement entrepris par les services spécialisés. Il n’y a pas eu vingt- deux villageois, dont 14 enfants, tués par les forces camerounaises de défense et de sécurité à Ngarbuh »,* martèle le Mincom.

A lui de poursuivre en ajoutant que *« Les bandes armées que sévissaient dans cette zone semant la terreur auprès des populations ont trouvé refuge à Ngarbuh, pour y installer leur base arrière, et réorganiser le racket des usagers, tout en perpétrant des exactions innommables sur l’axe menant à Ntumbaw. Alertées par les populations, les forces de défense et de sécurité se sont alors déployés à Ngarbuh, en opération de reconnaissance le 15 février 2020 (…) les éléments de nos forces de défense ont été violemment pris à partie par un groupe d’individus lourdement armés, (…) au cours des accrochages, un incendie s’est déclaré dans un refuge fortifié qui contenait des explosifs et des produits inflammables stockés par les rebelles armés, (…) le bilan de cet incendie après recoupement, fait état de 5 morts, une femme et quatre enfants. »* Tout en soulignant qu’une enquête a été ouverte en vue des clarifications approfondies de tous les aspects liés à cet incident.

Face à la sortie des organismes nationaux et internationaux, de certains hommes politiques, et des publications de certains médias, le patron de la communication répond que *« Le gouvernement s’inscrit en faux contre les accusations fantaisistes et gratuites, portées par des activistes politiques, par les commanditaires des bandes armées sécessionnistes, par des organisations non gouvernementales ainsi que par certains médias nationaux et internationaux contre nos forces de défense et de sécurité ».*
***Myriane Djamegne***

<https://lavoixducentre.cm/massacre-au-village-ngarbuh-le-gouvernement-contre-attaque>

1. **Massacre de Ngarbuh – Akere Muna lance un appel à la paix**

Par

[**La Voix du Centre**](https://lavoixducentre.cm/author/lavoixducentre)

 -

17 février 2020

***L’ancien candidat à l’élection présidentielle pense que le temps est venu pour que des véritables solutions de paix soient trouvés avant que le Cameroun ne perde son âme.***

L’avocat Akere Muna est très inquiet de la situation dans les zones anglophones du Cameroun. Suite au massacre de Ngarbuh (également connu sous le nom de Ngar) à Donga Mantung, dans la région du Nord-Ouest du Cameroun, l’ancien président de la branche de Transparency International Cameroun est monté au créneau. Sur son compte tweeter, il écrit :

« Village de Ngar, Donga Mantung, la souffrance, la mort et le meurtre sont désormais la nouvelle norme. Comment en sommes-nous arrivés là où la vie humaine n’a plus aucune valeur ? » se demande-t-il. Pour l’homme politique, « Nous devons tous, maintenant, chercher sincèrement la paix avant que ce pays ne perde son âme », ajoutant qu’il prie « pour toutes les victimes innocentes ».

Plusieurs personnalités ont exprimé leur inquiétude face au silence prolongé de la communauté internationale après ce massacre. Le 14 février dernier 27 personnes, dont des femmes et des enfants, auraient été tuées par des soldats camerounais à Ngar. Selon les témoins certaines victimes ont été abattus, d’autres ont été brûlés à mort à l’intérieur de leurs maisons. Les victimes ont été enterrées dans une fosse commune, mais certains cadavres n’ont toujours pas été retrouvés.

**Albertine Essomba**

<https://lavoixducentre.cm/massacre-de-ngarbuh-akere-muna-lance-un-appel-a-la-paix>

1. **Double attaque de Galim et Bamenda – Le gouvernement « dénonce le silence des organisations non gouvernementales et autres acteurs de la communauté internationale »**

Par

[**La Voix du Centre**](https://lavoixducentre.cm/author/lavoixducentre)

 -

9 mars 2020

***Dans un communiqué publié dans la nuit du 8 mars 2020, le porte-parole du gouvernement, René Emmanuel Sadi revient sur l’attaque perpétrée le 7 mars à Galim dans la région de l’Ouest et l’explosion d’un engin télécommandé le 8 mars à Bamenda, capitale régionale du Nord-ouest.***

Yaoundé exhorte ses partenaires internationaux à condamner ces attaques qui ont couté la vie à 9 personnes donc 5 hommes en tenue. Concernant de la première  attaque de Galim, on apprend que les assaillants lourdement armés, près d’une cinquantaine d’individus, « relevant des hordes terroristes sécessionnistes, en provenance de la région du Nord-ouest, sont entrés à Galim, dans une caravane motorisée qui s’est dirigée à dessein, sur les sites abritant la brigade territoriale de gendarmerie et le poste de sécurité publique de l’arrondissement de Galim ».

Cotée bilan, on dénombre huit personnes tuées, dont deux gendarmes et deux fonctionnaires de la police, ainsi que quatre civils.

Après Galim, un autre attentat a surgit à Bamenda. Là-bas, c’est une explosion d’un engin télécommandé au cours du défilé du 8 mars qui a fait un mort (militaire) et sept blessés, parmi lesquels quatre soldats. Suite à ces attaques, le gouvernement camerounais, «  dénonce le silence des organisations non gouvernementales et autres acteurs de la communauté internationale, face à cette cruauté des bandes terroristes sécessionnistes, dont les commanditaires continuent du reste, de bénéficier du soutien et de la protection de certains partenaires internationaux », peut-on lire dans le communique du Mincom.

Le ministre de la communication (Mincom), poursuit en ajoutant que « le gouvernement appelle les pays amis et partenaires internationaux du Cameroun a reprouver avec une égale détermination ces attaques terroristes dont est victime le peuple camerounais. Il les invite à prendre, dans le cadre de leurs compétences respectives, toutes les mesures de droit contre ces ennemis de la paix qui entretiennent la situation d’insécurité dans les régions du Nord-ouest et du Sud-ouest, et dont certains résident à l’étranger ».

**Jean-Claude Kendeg**

<https://lavoixducentre.cm/double-attaque-de-galim-et-bamenda-le-gouvernement-denonce-le-silence-des-organisations-non-gouvernementales-et-autres-acteurs-de-la-communaute-internationale>

1. **La Chine, la Russie et les Etats unis se désolidarisent des séparatistes**

Par

[**La Voix du Centre**](https://lavoixducentre.cm/author/lavoixducentre)

 -

6 mars 2020

***Trois des cinq membres du conseil de Sécurité de l’ONU, n’adhèrent plus à la cause des ambaboys qui ont transformé une lutte pacifique en des exactions terroristes. Provoquant ainsi  des pertes en vies humaines, des dommages psychologiques et matériels.***

Après 3 ans de guerre, la Russie, la Chine et les USA se prononcent pour l’unité du Cameroun. La Russie fustige toute ingérence dans ce conflit qui selon elle est du ressort des Camerounais eux même manifestant une volonté réelle de mettre fin à cette opposition
 les Etats Unis quant à elles comptent accompagner le Cameroun, pays de Paul Biya à une meilleure implémentation de la décentralisation car il n’est pas question d’un Etat dans un Etat. Position qui est comparable à celle de la Chine qui réaffirme son soutien total au Cameroun terre d’accueil de nombreux réfugiés.

 Malgré la campagne de diabolisation du pays et de son Président, la situation s’améliore d’avantage. Le SUD Ouest est pratiquement sorti du spectre de la barbarie. Le Nord-Ouest l’est aussi malgré quelques foyers de résistance. Il est aussi en voie de pacification.
Certains camerounais doivent arrêter cette campagne de déstabilisation que contre leur pays pour des raisons purement partisanes ou tribales.

Le tribalisme, les crises identitaires et sécuritaires, l’apologie de la haine contribuent à la destruction de ce grand pays ! Seul l’esprit patriotique, la passion de ce que cette grande mosaïque culturelle est gage du développement social et de sa prospérité.

**Judith MELINGUI**

<https://lavoixducentre.cm/la-chine-la-russie-et-les-etats-unis-se-desolidarisent-des-separatistes>

1. **Le parlement français va débattre de la crise anglophone le 25 mars prochain**

Par

[**La Voix du Centre**](https://lavoixducentre.cm/author/lavoixducentre)

 -

2 mars 2020

***C’est ce qui ressort des échanges entre les membres de la Commission des Affaires étrangères de l’Assemblée nationale française***

Le cas du Cameroun sera au menu des échanges du parlement français le 25 mars prochain. C’est en tous cas ce qui ressort d’une vidéo virale entre les membres de la Commission des Affaires étrangères de l’Assemblée nationale française. Dans cette vidéo, on peut clairement voir les députés, Didier Quentin, Boris Nadot et Rodrigue Kokouendo évoquer la question du Cameroun avec beaucoup de frayeur.

Selon ces parlementaires français la situation du Cameroun est assez chaotique et mérite assez de temps pour être discutée. C’est pourquoi après concertation, les parlementaires français ont décidé de se pencher sur la question du Cameroun de façon plus approfondie le 25 mars prochain.

Il faut noter que cette évocation fait suite au meurtre de Ngarbuh dans le Nord-Ouest, où plusieurs enfants ont perdu la vie, tué par les éléments de l’armée selon le député Boris Nadot.

**Albertine Essomba**

<https://lavoixducentre.cm/le-parlement-francais-va-debattre-de-la-crise-anglophone-le-25-mars-prochain>

1. **Massacre de Ngarbuh – Paul Biya ordonne l’ouverture d’une enquête**

Par

[**La Voix du Centre**](https://lavoixducentre.cm/author/lavoixducentre)

 -

28 février 2020

***Sur instruction du chef de l’Etat, une enquête a été ouverte. Elle aura pour but d’apporter les clarifications approfondies sur cet incident qui a couté la vie à plusieurs personnes dont des femmes et des enfants***

 Le gouverneur du Nord-Ouest, Adolphe Lele Lafrique Deben Tchoffo, a annoncé hier, la mise sur pied d’une commission d’enquête sur ordre du Chef de l’Etat Paul Biya. Cette commission a pour but de permettre d’avoir des « clarifications approfondies de tous les aspects liés à cet incident » a ajouté le ministre de la communication, porte-parole du gouvernement, René Emmanuel Sadi, hier soir à Yaoundé lors d’un point de presse qu’il a  donné pour rejeter en bloc, le dernier rapport de Human rights watch qui accable l’armée camerounaise dans ce massacre des populations civiles.

La commission d’enquête dont la composition des membres n’a pas été divulguée, a huit jours pour rendre ses conclusions. L’ONU et d’autres organisations internationales ont réclamé une enquête indépendante et impartiale sur le massacre des populations civiles survenu le 14 février 2020 à Ngarbuh, un village du Nord-Ouest, l’une des deux régions anglophones en proie à une guerre séparatiste.

**Albertine Essomba**

<https://lavoixducentre.cm/massacre-de-ngarbuh-paul-biya-ordonne-louverture-dune-enquete>

1. **Plan présidentiel de reconstruction et de développement des Régions du NOSO – Campagne de sensibilisation sous fond de menaces des séparatistes**

Par

[**La Voix du Centre**](https://lavoixducentre.cm/author/lavoixducentre)

 -

24 juin 2020

***Le ministre Paul Tasong et ses collaborateurs entament, ce lundi 22 juin 2020 par Bamenda, chef-lieu du Nord-Ouest, une campagne de sensibilisation auprès des populations locales sous fond de menaces des séparatistes.***

Cela fait deux mois que Paul Tasong et ses collaborateurs ont été nommés par le Premier ministre, chef du gouvernement au poste de coordonnateur du Plan présidentiel de reconstruction et de développement des Régions du Nord-Ouest et du Sud-Ouest. Ces derniers ont entamé le lundi 22 juin 2020 par Bamenda, chef-lieu du Nord-Ouest, une campagne de sensibilisation auprès des populations locales. Selon des sources, les séparatistes qui font la guerre depuis quatre ans contre l’armée régulière pour l’indépendance des deux Régions anglophones ne l’entendent pas de cette oreille et ont entrepris de mettre en mal l’initiative. A cet effet, trois jours de ville morte depuis le lundi 22 juin 2020. Dans les faits, le premier jour de la semaine, est déclaré par les sécessionnistes « Lock down », une journée au cours de laquelle toutes les activités sont suspendues au Sud-Ouest et au Nord-Ouest.

*« Nous sommes fatigués de cette guerre qui ne profite à personne, mais qui va à l’encontre du bien des populations. L’état a déjà fait trop en tendant la main aux séparatistes à travers le comité de démobilisation et de réinsertion. Il n’est pas question pour l’état d’abandonner ses populations meurtris par une guerre qui a déjà assez duré. Nous continuons à lancer des appels en vue du dépôt des armes par ces dernier »,* lance un observateur.

Rappelons que le Plan présidentiel de reconstruction du Nord-Ouest et Sud-Ouest est l’une des recommandations du Grand dialogue national tenu à Yaoundé du 30 septembre au 4 octobre 2019, pour trouver des solutions à la crise socio-politique au pays. Si ce plan est une opportunité de ramener la paix dans ces régions, de nombreux observateurs évoquent des manquements dans la non prise en compte des protagonistes qui ont été absents à ce grand dialogue. C’est donc une mission assez délicate à laquelle Paul Tasong devra trouver une formule qui fait l’unanimité.
***Oscar Onolo***

<https://lavoixducentre.cm/plan-presidentiel-de-reconstruction-et-de-developpement-des-regions-du-noso-campagne-de-sensibilisation-sous-fond-de-menaces-des-separatistes>

1. **Décès de Samuel Wazizi – Top secret sur les résultats de l’enquête**

Par

[**La Voix du Centre**](https://lavoixducentre.cm/author/lavoixducentre)

 -

17 décembre 2020

Après l’annonce de la mort du journaliste, alors qu’il était détenu par les autorités, le chef de l’État a ordonné l’ouverture d’une enquête sous la pression des ONG et l’opinion publique camerounaise. Plus d’un an après, les résultats des investigations restent un secret d’Etat.

Il y a exactement un an et trois mois qu’une enquête a été ouverte pour déterminer les causes et les circonstances de la mort de Samuel Wazizi. L’homme de média d’expression anglaise, soupçonné par les autorités d’intelligence avec les indépendantistes du NOSO (Nord-ouest et  Sud-Ouest) avait été incarcéré. Puis, sa famille est restée sans nouvelles de lui jusqu’au jour où l’on annonce son décès. Cette nouvelle avait provoqué l’indignation au sein de l’opinion publique camerounaise et des organisations de défense des droits de l’Homme tels que RSF (Reporters sans Frontières) Mandela Centre… 15 mois après la mort du journaliste,  les résultats de l’enquête ne sont toujours pas connus.

 D’où cet appel de RSF au pouvoir de Yaoundé : « plus de 15 mois  après la disparition forcée du journaliste, les autorités camerounaises continuent à s’enfermer dans le silence sur les circonstances de sa détention et de sa mort, rendue publique début juin 2020. L’ACAT-France et Reporters sans frontières (RSF) exhortent la présidence de la République du Cameroun à rendre public le rapport d’enquête et ses conclusions transmises au président Paul Biya. », Peut-on lire dans un article publié sur le site de RSF, qui retrace également les circonstances dans lesquelles la victime s’est retrouvée dans les verrous. « Samuel Wazizi, accusé d’être un  « terroriste » par les autorités du Cameroun, a disparu depuis le 7 août 2019, date à laquelle il a été transféré d’un commissariat de police de Buea, à une installation militaire située dans la même ville. Le journaliste de Chillen Music Television (CMTV) avait été arrêté par la police à Buea, le 2 août 2019. Il avait alors confié à son avocat, la toute dernière personne de son entourage à l’avoir vu vivant, que son arrestation était liée à des propos critiques qu’il avait tenus à l’encontre des autorités quant à la gestion de la crise anglophone. », raconte RSF. Après son arrestation, il a fallu attendre 10 mois pour que les autorités camerounaises, brisent le silence. Elles  font des révélations sur la mort du détenu avant de se murer à nouveau dans un mutisme inégalable, après avoir annoncé  l’ouverture d’une enquête.

Nous sommes le 5 juin 2020. Le capitaine de frégate, Serge Cyrille Atonfack, par ailleurs porte-parole du ministère de la Défense, faisait savoir que  Samuel Wazizi, « actif au sein d’un groupe séparatiste », était décédé d’une infection généralisée le 17 août 2019 à l’hôpital militaire de Yaoundé. « Il n’a subi aucun acte de torture ou sévices corporels » affirmait-il, ajoutant que la famille avait été prévenue. », se rappelle RSF. Seulement, ces révélations sont en déphasage avec les affirmations des proches de Wazizi. Ces derniers ont confié à cette organisation que le journaliste présentait des signes de violences et des blessures. Elle a d’ailleurs pu consulter les photos de Samuel Wazizi prises le 13 août 2019, jour de son transfert de Buea à Yaoundé.

La Commission nationale des Droits de l’Homme et des Libertés (CNDHL) pense pour sa part que  la sécurité militaire a transmis les résultats de l’enquête au président de la République. Clément Boursin, le responsable Afrique de l’institution ajoute qu’ « au regard des activités terroristes de Samuel Wazizi au moment de son arrestation, il ne nous semble pas indispensable que le président de la République rende publiquement compte des détails relatifs à cette affaire.». Des déclarations pour le moins choquantes qui font froid dans le dos de  RSF et L’ACAT-France qui pensent que la commission devrait être impartiale et lutter pour que le voile soit levé sur cette affaire et que justice soit rendue. L’on apprend aussi que depuis l’annonce de son décès, le corps de Samuel Wazizi n’a jusqu’à présent pas été remis à sa famille. « La transparence et l’établissement des responsabilités sont indispensables pour faire la lumière sur le décès de Samuel Wazizi. », insiste l’organisation de défense des droits des journalistes.

<https://lavoixducentre.cm/deces-de-samuel-wazizi-top-secret-sur-les-resultats-de-lenquete>
