# Supplementary material
Source: Research Square preprint supplement (doi:10.21203/rs.3.rs-8545290/v1)
Supplement: Supplementary file 12 [file f1d4aa20206c1e21de5f1513.docx]

# Ayah Paul Abine’s Case: Lawyers Request Immediate Liberation

**By Ludovic Amara(stagiare) 17 march 2017**

They were at the Mfoundi High Court yesterday and will go again on March 21. Lawyers defending Justice Ayah Paul Abine, Deputy Attorney General at the Supreme Court, arrested on January 21, 2017 in connection with the socio-political crisis rocking the Anglophone parts of Cameroon, have requested that he be immediately liberated. The college of four lawyers defending the magistrate say existing laws were violated in the arrest and so he should be freed. Close-door deliberations on whether or not the request should be granted began at the Mfoundi High Court in Yaounde yesterday March 16, 2017. This was under the President, Nke Joseph Marie, State Prosecutor, Tang Ruben and Court Registrar, Ekassi Renee. Barrister Luke Kisob led a college of four lawyers to defend the incarcerated super-scale magistrate Ayah Paul Abine. Speaking to Cameroon Tribune after the over three-hour discussions, Barrister Luke Kisob said “on March 6, 2017 we filed a prerogative rit called “Habeas Corpus” meaning bring the body and explain why he was arrested. We consider that his arrest was illegal. Therefore, it is a special procedure asking that he should be liberated immediately because his rights were violated.” The lawyer added that the deliberations “have nothing to do with the substantive matter or the merits of the case. It’s a matter that has to do with the form and his continues detention. Nobody is above the law, but what we are saying is that the law should be respected if proceedings have to be carried out against anybody.” Although Barrister Kisob declined disclosing how the indoor discussions faired, arguing that “we lawyers cannot comment on matters that are still ongoing in court,” his fellow colleague of the defence bench, Barrister Ndong Christopher, told the press that the deliberations however permitted them to have an idea of what Justice Ayah Paul Abine is being accused of. He said they learned during the deliberations that their client is accused of “complicity in terrorism and rebellion, secession and spreading false information.” All attempts to get the government bench react failed. The lawyers said they will be back again on March 21, 2017.

[**https://www.cameroon-tribune.cm/article.html/6758/en.html/ayah-paul-abines-case-lawyers-request-immediate-liberation**](https://www.cameroon-tribune.cm/article.html/6758/en.html/ayah-paul-abines-case-lawyers-request-immediate-liberation)

# Bamenda: Fire Razes Shops In Food Market

**By Carine Eleme 16 march 2017**

The fire is said to have been setup by unidentified individuals. The recent sporadic burning of some places in the North West Regional capital Bamenda has put the forces of law and order on red alert. After the burning of the the Nkwen market, CENAJES Bamenda, some section of the Faculty of Health Science of the University of Bamenda just to name a few, the population woke up Tuesday March 14 to see the Food Market on flames. The fire that started around 2: 30 am ravaged a good portion of the market. According to the Government Delegate to the Bamenda City Council, Vincent Ndumu Nji about 10 lockup shops were completely ravaged by the fire and over 60 sheds were consumed. One of the victims Rose Sirri, told reporters that when she arrived the scene at about 3am she met her shop on flames. Meanwhile Anyinkame Esther could not hold back her tears saying she recently took a five million loan to buy goods for her shop and all have been razed by fire. She plead with the government to come to their assistance .During a meeting with the victims , the Government Delegate to the Bamenda City Council Vincent Ndumu Nji requested the population to be calm as investigations have been opened to bring culprits to book. He promised to plead with the government to assist victims. He said in the days ahead the Bamenda City Council will construct shops and sheds for the traders. He called on the population to collaborate with the forces of law and order so as to trap down the perpetrators of the act. He equally called on them not to be afraid but to go about their daily economic activities. For the Government Delegate, the act was perpetrated by those promoting ghost towns. On their part, the traders requested the government delegate to employ night watchmen. Worth mentioning is that the section of the market burnt has no electricity thus concealing the possibility of a short circuit. Some traders complained that while at the market on Monday March 13 they received threats from unknown persons accusing them for opening and selling on ghost town days, thus promising to burn their shops.

[**https://www.cameroon-tribune.cm/article.html/6700/en.html/bamenda-fire-razes-shops-in-food-market 1/**](https://www.cameroon-tribune.cm/article.html/6700/en.html/bamenda-fire-razes-shops-in-food-market%201/)

# Women's day 2017: Thousands Turn Out In Buea

**By Richard kometa 09 march 2017**

Thousands Turn Out In Buea Some 30 women's groups march past at the Buea ceremonial ground in Clerks' Quarters yesterday to mark this year’s international day of the woman. The various groups carried placards calling for equality between men and women and inviting women to be more active in public life. For three hours running after Governor Okalia Bilai and wife Nicole arrived at the ceremonial ground, songs, dances, displays ending up in group march past in splendid women's day attire marked the day. Some five musical bands animated the day in Buea including that of ENAP, BGS Molyko and the Military. Opening the day, Governor Okalia Bilai addressed the women of the South West Region calling on them to send their children back to school so that the girls among them can gain their rightful place in society and exercise leadership roles tomorrow. The Governor called on men to act side by side with women so that the theme of this year's celebration can fully materialize namely; "Women in a changing world of work: Planet 50-50 by 2030". The women's groups in their turns carried placards urging women of age 20 to register massively in voters list so as to have the chance of exercising their voting rights when the time comes. The march past was led by the Governor's wife Nicole Okalia, followed by the Vice Chancellor of Buea University, Prof. Nalova Nyonga and many other women of the forces of law and order, theme bearers, women of the judiciary, wives of administrative command staff, solidarity women, professional groups, NGOs, cooperatives, socio-cultural groups, religious and political groups. Particularly, the women called for equal rights of succession and land ownership. The South West Regional Delegate of Women Empowerment and the Family, Judith Moffah, recalled that the women's day was conceived since 1997 to better the condition of the woman who is still at 92% in the informal sector. She called on men to get involved in the campaign of the "He for she".

[**https://www.cameroon-tribune.cm/article.html/6462/en.html/women-s-day-2017-thousands-turn-out-in**](https://www.cameroon-tribune.cm/article.html/6462/en.html/women-s-day-2017-thousands-turn-out-in)

# Universities Of Bamenda, Buea: Absentees Will Have Themselves To Blame by 23 feb 2017

Absentees Will Have Themselves To Blame Below is a press release from the Minister of Higher Education. The Minister of Higher Education, Chancellor of Academic Orders, informs the national and international university community of the effective resumption of classes, including on the job training (practical and fieldwork for the gaining of knowhow in view of a better employability of graduates) in the universities of Bamenda and Buea. Besides the classical transmission of knowledge and the acquisition of competences, as prescribed by the BMP or BMD system, evaluations and continuous assessments are regularly organized, in each establishment and at the Level of each cycle (from B1 or L1 to B3 or L3 and to M). Since the state has provided enough security to the two regions and the two vice-chancellors are meticulously taking statistic on the absences and the effective presence of students, the Minister of Higher Education reminds every teacher, support staff or student that injustified absences willfully puts the concerned in a position of administrative discordance or in a situation of pedagogic and professional deficiency. In order that no one forgets, the Minister of Higher Education, precises that the two vice-chancellors are under the obligation to transmit to him, for competence and reporting on a case by case basis, the list of all those who have knowingly opted for administrative, professional or academic delinquency. (s) Jacques FAME NDONGO

[**https://www.cameroon-tribune.cm/article.html/5907/fr.html/cameroon-tribune**](https://www.cameroon-tribune.cm/article.html/5907/fr.html/cameroon-tribune)

# Bamenda: Women Urged To Strive For Excellence

**By Carine Eleme(stagiaire**)

They braved the odds to celebrate thier day at the commercial Avenue grand stand. The women folk of the North West regional capital Bamenda joined their counterparts world wide to commemorate the international women's day this March 8, 2017. The venue was the commercial Avenue grand stand where the women ignored calls of boycott to celebrate their day.The ghost town which caused the scarcity of taxis and commercial motocycles did not stop the women who braved all odds some of whom trekked to the grand stand for the celebration. Governor Adolphe Lele L'Afrique who chaired the celebration urged women to promote peace. He called on women to continue to work hard so as to sustain the family and the world at large. He equally encouraged women to always strive for excellence in all they do. The colourful march-past that graced the occasion saw the women in their colourful outfit carrying placards supporting this year's theme which read " Women in a changing world of work, Some messages also called on the government to continue dialogue so as to put an end to the present crises rocking the two English speaking regions. They equally expressed their zeal to ensure that their children go back to school. The 32nd edition of the International Women's day celebration was more meaningful to some woman who received prizes of the Head of State for outstanding performance in their different spheres of work.

# North West: Teachers’ Strike Enters Sixth Week 1/2 North West: Teachers’ Strike Enters Sixth Week

By Carine ELEME (Stagiaire 17 Janv. 2017

Bamenda streets were empty and void of students and pupils, as well as commercial activities. The Anglophone teachers strike that have kept schools in the North West and South West Regions closed since November 21, 2016 is still to get a way forward as members of the Inter-ministerial Ad hoc Committee to review and propose solutions to the concerns raised by Cameroon Anglophone Teachers Trade Unions and the trade union leaders did not come to a consensus last Thursday 12 and Friday13 January 2017. Despite the fact that some of the concerns have been sorted out while some are already in the pipeline, the teachers trade unions are yet to call off the strike. During a sojourn to some of the schools in Bamenda this Monday January 16, all the schools were deserted and school gates remained closed even without watchmen at the gate. On the streets of Bamenda, the story is not different as the population is respecting a two-day ghost town called by the Anglophone Civil Society Consortium to protest the shooting of youths during the dialogue meeting with the inter-ministerial committee on Friday in Bamenda. “No schools, no movements, stay indoors on Monday and Tuesday 16 and 17 2017”. This is the password following a decision of the 14 of January declaring a ghost town in the North West and South West regions by the Cameroon Civil Society Consortium. A press release to this effect signed by Barrister Nkongho Felix, Dr Fontem A. Neba and Tassang Wilfred, Protest the shooting and arbitrary arrest and maiming of people by the police and Gendarmes when the teachers trade union leaders were preparing to educate the public on the gains of the 48 hours discussion towards the eventual solutions to concerns raised by striking teachers. The release advices the population against the burning of tires, confrontation and provocation, violence during the ghost town. They also request the government to organize a referendum toward the return of a two state federation for Cameroon. It also emerged from the consortium that the talks were frank, occasionally cordial and heated and featured a plethora of issues ranging from admissions in to professional schools, the non respect of certain laws, to the creation of infrastructure to serve Cameroon education. The consortium also wants all youths arrested during the strike action released.

[**https://www.cameroon-tribune.cm/article.html/4497/en.html/north-west-teachers-strike-enters-sixth-week 2/2**](https://www.cameroon-tribune.cm/article.html/4497/en.html/north-west-teachers-strike-enters-sixth-week%202/2)

# Bamenda: Schools Gates Still Awaiting Students By Carine ELEME (Stagiaire

Ministers of Secondary and Basic Education plea for parents to send children to school fell on deaf ears. The streets of Bamenda were dry and void of people yesterday Monday January 9, 2017 expected date for the resumption of the second term of the 2016-2017 academic year. Be it at Bamenda I, II or III the school no students were found in the schools CT visited. On the streets one could hardly fine motorbikes, taxis or even private vehicles, markets were open but with no traders, all commercial activities were grounded. Most people on the streets of Bamenda said they could not send their children to school until the problem is solved. To Mr Che Ngwa who was found trekking from up station to T-Junction yesterday morning, it was best if the government solve the Anglophone teacher’s trade union problems. According to him, it will guarantee the future of his children. He told CT that he could not afford to send his four kids because the teachers have not yet call off the strike. He said the government cannot be asking parents to send their children to school when they are not the ones who called for a strike. He pleaded with the government to frankly discuss with the teachers’ trade union leaders and seek solutions so that they can call off the strike for children to go back to school. Some parents seem not to bother about their children staying out of school for the rest of the academic year. They argue that solving the problem is for the betterment of the English subsystem of education. This is just one of the frank talk with most people on the streets of Bamenda Monday morning. Meanwhile, the Ministers of Secondary Education, Jean Ernest Massena Ngalle Bibehe and that of Basic Education, Adija Alim who were in the North West Region to supervised the effective reopening of the second term had to shortened their six- day mission to the region after they got disappointed as all schools still remain empty. From the look of things, the population did not heed to the call of the Ministers who had urged parents to send children to school while negotiations continue with the teachers trade union leaders. All attempts to get both Ministers talk proof futile.

<https://www.cameroon-tribune.cm/article.html/4337/en.html/bamenda-schools-gates-still-awaiting-students>

# Conditions Met For Classes To Resume By Rita DIBA 09 Janv. 2017

The following is a press release from the Minister of Higher Education: “In keeping with the Highest Orientations contained in the address of the President of the Republic, Head of State on the 31 December 2016, in direct relation to the press release of the Prime Minister, Head of Government on the 5 January 2017, the Minister of Higher Education, President of the Inter-Ministerial Committee in charge of examining and proposing solutions to grievances raised by Teachers’ Trade unions, recalls that the 4 Ordinary session of the said instance will meet at the end of the Month of January 2017. Like the first three sessions, it concerns all Teachers’ Trade Unions without exception. Its objective is to prepare the National Education Forum which is scheduled to take place this year in keeping with the announcement of the Prime Minister, Head of Government on the 2 of December 2016. It will also take into consideration the restitution of work done by the two groups that were put in place during the 3 Ordinary session of the Commission on the 30 of December 2016 on the economic and financial problems of teachers on the one hand, and on social problems on the other. All the conditions are therefore met for classes to resume in all serenity on the 9 of January 2017 on the entire territory as underscored by the Prime Minister, Head of Government in his presse release of the 5 of January 2017. The security of teachers, pupils, students and parents is guaranteed by the State as emphasized in the afore mentioned Press release of the Prime Minister, Head of Government, that no one can violate the the Constitution by asking pupils and students not to go to class, thereby putting at stake the future of thousands of young Cameroonians who only want to resume school, so as to become competent and competitive citizens like their elders, who are effectively contributing to the socio-economic and cultural development of our dear and beloved country. The right to education is inalienable (preambule of the Constitution of the Republic of Cameroon and Article 17 of African Charter of Human and People’s Rights of 1980 ratified by the State of Cameroon). The President of the Inter-Ministerial Committee counts on all social groups to ensure that this unquestionable right to education is respected.” (s) Pr Jacques FAME NDONGO

<https://www.cameroon-tribune.cm/article.html/4301/en.html/conditions-met-for-classes-resume>

# Bamenda: Efforts Multiply For Classes To Resume

By Carine ELEME (Stagiaire 09 Janv. 2017

Some parents however still have fears despite assurances of security. Monday January9, 2017 is the expected date for resumption of the second term of 2016/2017 academic year, but uncertainty reigns in Bamendaif children and teachers will go back to school on not. While rumors are rife that Bamenda will witness a ghost town this Monday January 9, the government has embarked on a campaign to call on teachers, students and pupils to resume classes. Despite this, most parents are still skeptical to send their children to school. In the North West regional capital of Bamenda most parents say they will not send their children to school because the whole town is militarized and there is an aura of fear of the unknown. For MrAwantoSammuelAmabo the government should solve the problems with the teachers before he can be assured of sending his children back to schools. He holds that sending the children back to school is not the solution but insist that with the presence of the military around town there is tension. Government on its part, hasintensified calls for teachers and students to go back to schools this Monday. The Governor of the North West Region has called on the population to send their children to school this Monday. Governor AdolpheLeleLafrique has assured all of the security of their children. Meanwhile, the Minister of Secondary Education Jean Ernest Massena Ngalle Bibehe is presently in the region to see the effective start of the school term. While meeting with the teachers trade union leaders on Saturday January 7, 2017 in Bamenda, they all agreed to look for solution so that pedagogic activities can resume. In a press release that sanctioned the meeting it was stated that the trade union leaders acknowledged the proactive approach and steps taken by the Minister such as the redeployment of teachers to class rooms where their competences predisposes them to operate. They all prayed that the chairperson of the Ad hoc Committee hastens up the meeting of the committee so as to pave the way for concrete solutions to the other burning issues raised.

[**https://www.cameroon-tribune.cm/article.html/4299/en.html/bamenda-efforts-multiply-for-classes-resume 1/1**](https://www.cameroon-tribune.cm/article.html/4299/en.html/bamenda-efforts-multiply-for-classes-resume%201/1)

# “Real Peace”: A Call For Return To Normalcy

By 07 Mai 2018

The single track album by Lemmy Moïse was prompted by Cameroon’s current security challenges. No Cameroonian can be indifferent to the prevailing insecurity in some parts of the country such as the Boko Haram insurgency in the north and the intermittent clashes between the military, security forces and armed men in the North West and South West Regions. Adding his voice to calls for return to normalcy, Njang artiste, Lemmy Moïse - whose real name is Lemngeh Moses Bruce - last year released “Real Peace,” a single-track album. “I was motivated by the incessant wars around the world, Boko Haram attacks and the troubles in the North West and South West Regions of Cameroon,” explains Lemmy. “Real Peace” “talks about situations that cause war and suggests how to attain real, lasting peace,” says Lemnyuy. “The main message is the quest for real peace and how we aggravate situations by not considering everyone in the decisions we take either as leaders or stakeholders. I revisit the problem and propose solutions,” he points out. “Everyone who has listened to the song has the same remark - it is the right message for these turbulent times,” says Lemmy Moïse. Concerning promotion, Lemmy has been on Cameroon Radio Television, CRTV and other local radio stations. “I’m still reshaping the online promotion. The six-minute song was released last year, so it is not up to a year old. The message is timeless. I will resume promotion by the end of the month. There were a few Ts to cut and Is to dot in the video,” he adds.

[**https://www.cameroon-tribune.cm/article.html/163/en.html/real-peace-call-for-return-normalcy 1/1**](https://www.cameroon-tribune.cm/article.html/163/en.html/real-peace-call-for-return-normalcy%201/1)

# Bamenda: Uneasy Calm After Disorder

24 Nov. 2016

Governor, AdolpheLeleLafrique on the field to reassure inhabitants of measures for life without stress in the City and neigbourhoods In the backdrop of uneasy calm, taxis, commercial motorcycles and interurban transport buses are back on the streets of Bamenda after the disorder that paralyzed economic activities on November 21 and 22 , 2016. Banks and shops whose doors were shot during the disorder are equally back to life with inhabitants going about their activities after days of stress during which trekking was in vogue with taxis, commercial motorcycles and interurban transport agencies off the streets. Violent outburst by some youths who erected barricades on the streets did not help matters. They were on the streets protecting the bumpy or ugly state of the city’s road infrastructure, poor work that is not helping matters on the rehabilitation of the City’s old water system and regular energy black outs. Away from the streets, the strike action called by teachers Trade Unions continues to paralyze the teaching and learning process. In effect, teaching and learning continues to suffer with teachers pupils and students rare to find in virtually all schools of the city and the University of Bamenda. Academic activities have been boycotted since November 21, 2016 and Teacher Trade Union leaders feature abundant literature protesting what they argue is marginalization and attempts to assimilate the Anglo Saxon sub sector of education in Cameroon. They appear at a loss that some of the brightest GCE Advanced Level students cannot qualify for the Medical school in the University of Buea, Bamenda and other professional schools, which they think, were created to serve their interest, just because they are required to know someone or have money to facilitate the process. In the short and long of it, the Teachers Trade Unions argue that it is not an issue against Francophones, but a crusade against the mismanagement of Anglophone cultural values in the nation’s bi-cultural set up. They stress that it is not a struggle between English speaking and French speaking children of Cameroon but an effort to correct structural and systematic mistakes or injustices that impose a beggarly life on Anglophones. It was against this backdrop that on November 23, 2016, North West Governor, AdolpheLeleLafrique went sizing up the situation, prescribing a door-to-door approach to advice inhabitants against disorder and reassuring the population of the government’s commitment to give dialogue, peace and order a chance in the City and neighbourhoods. The Governor made stopovers at the Mile 90 Check Point on the Bamenda-Bali-Batibo highway, Bamenda main market, the Matazen gateway into the North West region in Santa Sub Division, Nkwen and MankonFon's palaces. By Erick Maville, Directeur Général De L’association Santé En Entreprise (SEE)

[**https://www.cameroon-tribune.cm/article.html/2943/en.html/bamenda-uneasy-calm-disorder 2/2**](https://www.cameroon-tribune.cm/article.html/2943/en.html/bamenda-uneasy-calm-disorder%202/2)

# Education Problems: Government Takes Salutory Measures

By Aureline MELI (Intern) 05 Déc. 2016

The Head of State has ordered special subventions to lay private and denominational schools and recruitment of bilingual teachers. Since Thursday, December 1, 2016, the education community in Cameroon has witnessed salvaging measures taken by the Head of State, Paul Biya intended to bring serenity and order in the education sector, as well as improve the quality of teaching. The government measures have come within the context of the strike by teachers in the English speaking part of Cameroon and a planned strike by the others. Prime Minister Philemon Yang in a press release on December 1, 2016 disclosed that the President of the Republic took two special measures aimed at improving the working conditions in the public and private schools. The first measure, the release specified concerned the disbursement of a special subvention of FCFA 2 billion to lay private and denominational schools. In the second measure, « the Head of State authorised the special recruitment of 1,000 young bilingual Cameroonians, holders of Higher Education Diplomas, especially in scientific and technical subjects. » The teachers will have to be posted as matter of priority to regions where there an acute shortage of teachers of such subjects. Government has kept on listening to the problems raised by the education community. Prime Minister Philemon Yang on December 2, 2016 had a consultation meeting in his Office with some teachers trade unions. These are trade unions that had planned to go on strike today, December 5, 2016. The immediate fallout of the consultation was that the trade unions called off the strike action. Their leader came out of the Prime Minister Office with good news contained in the final communiqué. The news is that contract teachers in basic education would be integrated into the public service. The first phase concerns teachers recruited in 2005-2006 and the others would be integrated progressively. Also all contract teachers of the secondary education sector would be integrated into the public service. Anglophone Teachers’ Problems There is expected to be a thaw in the strike action undertaken by teachers in the North West and South West Regions. During recent consultations with the Prime Minister Yang in Bamenda, they presented a list of conditions to be met in order to call off the strike. The main one was the creation of a different negotiation platform with its sessions to be held either in Bamenda or Buea. The Prime Minister last Thursday in response, signed an order relating to the creation, organization and functioning of the Ad Hoc Inter-ministerial Committee tasked with examining and proposing solutions to the concerns raised by Anglophone teachers’ trade unions. The Ad Hoc Committee chaired by the Minister, Director of the Prime Minister’s Cabinet, Professor Paul Ghogomu Mingo has to be meeting in Bamenda.

[**https://www.cameroon-tribune.cm/article.html/3250/fr.html/cameroon-tribune 2/2**](https://www.cameroon-tribune.cm/article.html/3250/fr.html/cameroon-tribune%202/2)

# Buea Peace Walk: Concessions For School Resumption

By Richard Kometa 05 Déc. 2016

Council authorities staged a peace-walk last 30 November for school resumption. Thousands of pupils and students are expected back to school today (Monday) 5 December 2016 in Buea, South West Regional capital, after two weeks of class-interruption owing to the strike action calling for a redress in professional and political on-goings concerning the English sub-system of education in the country. Authorities of the Buea Council organised a peace walk at the Buea main street to get pupils and students back to school. Mr. Esunge Patrick, Mayor of Buea, who led the peace match on that ended up with an address to the South West Governor, explained that peace was sine qua non to any meaningful development. On-the-spot concessions were made by the Buea Council to release dozens of motor-bikes that had long been seized on account of breaking municipal laws. Equally, it was urged that the students detained following a strike action at the University of Buea be released unconditionally. The Registrar of the University of Buea, Professor Roland Ndip, confirmed to Cameroon Tribune Saturday morning (3 December) that the CFA 10.000 penalty formerly imposed on UB students for late registration of courses and late payment of fees has been reviewed by UB authorities. Also the list of students due payment of bursaries was announced and UB officials said the payments were to begin this Monday 5 December 2016. With these major concessions met, school resumption appears evident today in the various institutions of the South West Region. Taking part in the peace walk were thousands of taxi men, drivers and owners of buses, Council staff and some parents.

[**https://www.cameroon-tribune.cm/article.html/3268/fr.html/cameroon-tribune 1/1**](https://www.cameroon-tribune.cm/article.html/3268/fr.html/cameroon-tribune%201/1)

# Bamenda: Activities Gradually Resume

By Erick Maville, 06 Déc. 2016

Bamenda: Activities Gradually Resume Fears of alleged strike action by transporters slowed the economy but some vendors came out. Bamenda was slow to awake yesterday Monday, December 5, 2016. The population was gripped by the fear of weekend’s alleged strike action calling on transporters, taxi drivers and commercial motorcycle riders not to go out for work. That is perhaps, why some shops remained shot while very few taxis and commercial motorcycles circulated in town. The situation considerably slowed commercial activities all day. Away from that, the gates of schools remained shut on the strength of a December 2, 2016 release by All Anglophone Teacher Trade Unions who met in the neighbourhood of Presbyterian Church Centre, Ntamulung, Bamenda, their strike action continues into the third week. They argue that the new Adhoc Inter-ministerial Committee enlarged to include all Anglophone educational stakeholders to be chaired by the Director of the Cabinet of the Prime Minister’s Office, does not feature time lines of work and the lifespan of the committee. To them, the creation has not secured the implementation of any of their requests tabled during their consultations of November 25 and 26, 2016 with the Prime Minister, Head of Government, Philemon Yang. The release further argues that the announced recruitment of some 1000 bilingual Cameroonians by the President of the Republic inspires polemics that will not help the problem of the Anglophone sub-system of education. It equally calls for the release of some students of the University of Buea detained after the rioting of last week and condemns what they describe as the colonial rule of the South West Governor and the overdue stay of the current Vice Chancellor of the University of Buea.

[**https://www.cameroon-tribune.cm/article.html/3303/en.html/bamenda-activities-gradually-resume 1/1**](https://www.cameroon-tribune.cm/article.html/3303/en.html/bamenda-activities-gradually-resume%201/1)

# Bamenda Crises: Journalists Urged To Promote Peace

By Carine ELEME (Stagiaire 20 Déc. 2016

They were congratulated recently by North West Governor for the responsible reporting of the protest. The Governor of the North West Region, Adolphe Lele L’Afrique has given journalists a pat on the back for a job well done during the period of crises in the region. While congratulating some journalists he called on others to sit up. He urged journalists to be responsible in reporting saying that they should help in promoting peace. He added that the objective of the government is to ensure that peace reigns everywhere thus, journalists should help government achieve this. He recalled instances to some rumors that have been spread by some journalists and added that his doors are always open for information. He requested journalists present to always come to him for verification in case of doubts. The Regional Delegate for Communications, Louis Marie Begne was around to dish out some lessons to the journalists. He asked them to work in keeping with the norms of the profession. To some journalists, it was a good initiative for the governor to talk to them. They thanked the governor for organising such a gathering and promised to do their job within the ambits of the law. It is worth mentioning that since the lawyers and teachers’ strike started on October 11, and November 21 respectively, journalists have been on their heels feeding the population on what is going on. While some were spending sleepless nights giving the population right information and promoting peace while others specialized in propagating rumours and disorder. With the sad events on Thursday December 8, some journalists were victims as they were on the frontline trying to get first hand information for the public. Some journalist suffered from teargas while others barely escaped for safety. With the call for professionalism, journalists are determined to do their job well.

[**https://www.cameroon-tribune.cm/article.html/3783/en.html/bamenda-crises-journalists-urged-promote-peace 1/1**](https://www.cameroon-tribune.cm/article.html/3783/en.html/bamenda-crises-journalists-urged-promote-peace%201/1)

# Bamenda: Lawyer’s Strike Stretches Into Fourth Week

By Monica NKODO 04 Nov. 2016

Casualties of the lawyer’s strike action are evident with Court premises functioning at half gear. The strike action called by Common Law Lawyers on 11 October, 2016 stretched into the 4 week since October 31, 2016. This time around, the Lawyers have stated preparedness to see the strike go indefinite until the government dialogues with them. Meeting in Bamenda on October 28, 2016 the Constituent Association of Lawyers announced the imminent creation of a Common Law Lawyers Bar if the government continues to ignore their request for the respect of the bi-jural system of justice in Cameroon. That apart, they question why the Cameroon Bar Council should call for an end to their strike in the face of what they claim is the government’s intransigence. It is against this background that they decided on an imminent diplomatic offensive to explain their plight. Meanwhile on-the-spot, the Courts of metropolitan Bamenda continue to function at half gear without Lawyers who often flood Court premises with litigants. From the look of things, the casualties are evident with Court premises boycotted by Lawyers. Revenue Collectors are virtually on holiday with little to collect for State coffers in filing fees, costs and fines. Litigants who are often protected by Lawyers are helpless with justice delayed. Meanwhile, the sacrifice is equally evident for Lawyers who cannot have their Honoraria or professional fees without handling cases.

**https://www.cameroon-tribune.cm/article.html/2214/en.html/bamenda-lawyers-strike-stretches-into-fourth-week# 1/1**

# Violence Re-emerges In Schools

By Yang 10 Nov. 2016

The phenomenon has become recurrent in Cameroon in recent years. Formerly, school campuses were considered to be safe environments, especially for children. However, that is no longer the case today. Many parents find it difficult sending their children to certain schools because of reported incidents of violence. Violence usually manifests through students against students, and students against teachers. Insults, rape, stigmatisation, humiliation, assault and fighting, among others, are the different forms of violence common in schools in the country these days. Recently, a student of the Charles Atangana Technical High School, Bastos, Yaounde, was severely beaten and almost killed by his mates after a quarrel on campus. The students of the same school are reported to have been involved in a fight with those of a neighbouring school. Reports from Douala say students of Government Bilingual High School, Deïdo, were punished for threatening one of their mates with a machete. Educational officials say the problem of violence in schools is of national concern. In order to stem the trend, school internal rules and regulations prohibit any form of violence, while guidance counselling units offer psychological assistance to perpetrators and victims of serious cases. Charles Atangana Technical High School has introduced campus police made up of students who inform the authorities of severe cases such as drug and games of chance on campus. A lot of sensitisation is also going on campus with the help of the students. Sporadic searches are conducted to find out if there any sharp objects in schools bags. The school also works with Special Police Unit in charge of Security of Schools and Universities. “Each time there is a case, we refer to them and they send us to the nearest police station for solution,” the official explained. The Head of the Special Unit in charge of the Security of Schools and Universities, Police Commissioner Bello Albert, said when there is a problem in any school, the police intervenes immediately to ensure that peace reigns. He explained that the police usually disperses crowds and in difficult cases, the ring leaders are arrested and interrogated. According to our source, most of the crimes on school campuses are often committed by individuals who are not students of the school. “They put on the school uniform and go and committee atrocities,” our source said. As a result, access cards are introduced in schools so that only regular students are accepted into campuses. Also, security measures are being tightened to ensure that nobody enters campuses after school hours

[**https://www.cameroon-tribune.cm/article.html/2454/en.html/violence-re-emerges-in-schools 1/1**](https://www.cameroon-tribune.cm/article.html/2454/en.html/violence-re-emerges-in-schools%201/1)

# Bamenda: Security Reinforced Against Protesting Youths

By Erick Maville, Directeur Général De L’association Santé En Entreprise (SEE) 23 Nov. 2016 08:46

Forces of Law and Order push back rioting youths from the streets, protesting ugly state of roads, poor work by Chinese company rehabilitating 40-year-old water system. Generalized trekking has been in vogue with very few commercial motorcycles available for service following Monday, November 21 2016 violent protests by some youths who erected barricades on the streets of Bamenda, burnt tires, slowed economic activities and seriously threatened social peace. Inhabitants are still at a loss about the situation which started with some youths who assembled in the neigbourhood of City Chemist Roundabout before proceeding to criss-cross the streets, expressing frustrations about the ugly state of roads in the city. Their first stop over was the Bamenda City Council premises where they destroyed the gate and shattered some window glasses. The City Council Secretary General, Waindim Jude Nsom barely had time to listen to their leaders when the coffin carrying youths led by a certain “Mancho BBC”, moved to the Bamenda food market where they equally destroyed the gate before forcing businesses to shot down at the Nkwen and Bamenda main markets. It emerged from the protesters that they are unhappy with a Chinese company that has been hired to rehabilitate the 40-year-old water system because they dig open roads and refill with cement instead of tar. They find it inconceivable that Bamenda features street lights during the day and none when most needed in the nights and blame or claim that the City Council has not graded roads in the last five years. The protest took many by surprise in a City that welcomed Monday, November 21 with a sit-in strike action by Teacher Trade Unions. In effect, the teaching and learning process suffered a setback in virtually all the colleges and primary schools in metropolitan Bamenda following the strike action by teachers protesting what they claim are attempts to assimilate the Anglo Saxon sub system of education in Cameroon. Academic activities were largely boycotted by teachers, most of whom stayed at home.Virtually all principals and Head Teachers contacted for comments, maintained sealed lips.

[**https://www.cameroon-tribune.cm/article.html/2853/en.html/bamenda-security-reinforced-against-protesting-youths 1/1**](https://www.cameroon-tribune.cm/article.html/2853/en.html/bamenda-security-reinforced-against-protesting-youths%201/1)

# University of Buea: Life Returns On Campus

By Richard Kometa 28 Mars 2017

The number of students in ‘the place to be’ has continued to increase following a call for lecturers to return to classes. Classes in the University of Buea witnessed more students yesterday 27 March 2017 following the declaration by the Buea University, (UB) SYNES chapter president, Professor Abangma James Arrey that the strike action they started on 21 November, 2016 should be suspended. The call which he made last Friday urged the teachers and students of the institution to return school while government seeks solutions to the issues raised by the Anglophone teacher trade unions. Cameroon Tribune visited the campus of the University of Buea yesterday and met students coming out of the Amphitheatre 150. Although most of them were shy to talk to the press about their classes they could be seen moving around or going out of the campus. Also the volley court was busy with students taking sports courses. News of the suspension of the strike was received with mixed satisfaction by those who have been attending courses at the university without being sure that things could return to normal within the university. Many had depended so much on speculations about the whereabouts of the leaders of the trade unions who remained invisible for the past months. With the sudden appearance of Professor Abangma last Friday to call off the strike more students came on campus yesterday and many are likely to join as the week unfolds. Speaking to Cameroon Tribune at the University yesterday, Professor Abangma James Arrey President of UB chapter of SYNES said; “I am already in campus prepared to teach.” He added that he had a pre-defence of a Master Degree thesis in Political Science which was postponed to today Tuesday. Some of the students were around him discussing last minutes preparation. At the Faculty of Art, many students were seen coming out of their Translation classes. Reactions Professor Abangma James Arrey: “I Had Programmed Three Defences” Lecturer UB “The number of students is increasing, but we know that by Wednesday the campus will be full. There were some classes. I had programmed three defences which have been shifted to 9 A.M. on Tuesday. Academic activities will pick up as some students who were out of town are coming in. Even the Lecturers who were not around are coming in Cham Victor: “I Received The News With Great Joy” Student UB “I received the news of the strike suspension with great joy. It will go a long way to rekindle hope in the minds of students who had given up. It is a positive step for our educational growth. Let’s move on while hoping that other unfinished business that orchestrated the strike is handled by competent authorities.” Dr. Sango Martin Ndeh: “I Think The Entire Lecturer Corps Was There” Lecturer UB “Following the call made by the President of SYNES last Friday, I came to teach today. I have been all day in campus. The information to call off the strike came at short notice. I have actually seen new faces in campus. I think the entire lecturer corps was there. For the students, they are still returning from where they were

[**https://www.cameroon-tribune.cm/article.html/7116/en.html/university-of-buea-life-returns-on-campus 1/2**](https://www.cameroon-tribune.cm/article.html/7116/en.html/university-of-buea-life-returns-on-campus%201/2)

# Education dans le Nord-Ouest et le Sud-Ouest: opération rattrapage

By Brice Mbeze 29 Mars 2017

Pour sauver l’année scolaire des élèves des régions du Nord-Ouest et du Sud-Ouest, le gouvernement camerounais n’est pas resté les bras croisés. L’école a repris, à la grande satisfaction de l’ensemble de la communauté éducative. Mais, suite au mouvement de grève des enseignants ayant perturbé le bon déroulement des cours pendant les derniers mois, Jean Ernest Masséna Ngalle Bibéhé, ministre des Enseignements secondaires (Minesec), a pris des mesures fortes pour récupérer les heures d’apprentissage perdues par ces enfants. Dans un communiqué rendu public le 3 mars dernier, le chef de département prescrit la poursuite des cours de rattrapage qui ont débuté depuis quelque temps dans la section anglophone. Le ministre exige aussi l’augmentation hebdomadaire de 17 heures de cours dans la partie anglophone pour la période allant du 6 mars au 13 mai prochain. Notamment deux heures de plus lundi, mardi, jeudi et vendredi. Trois heures mercredi et six au cours de la journée de samedi. Dans la même foulée, le ministre des Enseignements secondaires prescrit aussi le déroulement des cours pendant tous les congés de Pâques pour les élèves des classes d’examen. Du coup, les congés du deuxième trimestre compris entre le 31 mars et le 17 avril prochain ne leur seront pas de tout repos. Les apprenants des classes intermédiaires vont être sur les bancs pendant une des deux semaines de repos. Toujours dans le même communiqué, Jean Ernest Masséna Ngallé Bibehè, « invite tous les membres de la communauté éducative à s’investir pleinement, chacun en ce qui le concerne, en vue de la parfaite mise en œuvre de ces mesures dans tous les établissements de ces deux régions du Cameroun». "> Au-delà de l’augmentation des heures de cours, le Minesec a aussi annulé le 3 mars dernier, les congés de Pâques pour les élèves des classes d’examen Pour sauver l’année scolaire des élèves des régions du Nord-Ouest et du Sud-Ouest, le gouvernement camerounais n’est pas resté les bras croisés. L’école a repris, à la grande satisfaction de l’ensemble de la communauté éducative. Mais, suite au mouvement de grève des enseignants ayant perturbé le bon déroulement des cours pendant les derniers mois, Jean Ernest Masséna Ngalle Bibéhé, ministre des Enseignements secondaires (Minesec), a pris des mesures fortes pour récupérer les heures d’apprentissage perdues par ces enfants.

Dans un communiqué rendu public le 3 mars dernier, le chef de département prescrit la poursuite des cours de rattrapage qui ont débuté depuis quelque temps dans la section anglophone. Le ministre exige aussi l’augmentation hebdomadaire de 17 heures de cours dans la partie anglophone pour la période allant du 6 mars au 13 mai prochain. Notamment deux heures de plus lundi, mardi, jeudi et vendredi. Trois heures mercredi et six au cours de la journée de samedi. Dans la même foulée, le ministre des Enseignements secondaires prescrit aussi le déroulement des cours pendant tous les congés de Pâques pour les élèves des classes d’examen. Du coup, les congés du deuxième trimestre compris entre le 31 mars et le 17 avril prochain ne leur seront pas de tout repos. Les apprenants des classes intermédiaires vont être sur les bancs pendant une des deux semaines de repos.

Toujours dans le même communiqué, Jean Ernest Masséna Ngallé Bibehè, « invite tous les membres de la communauté éducative à s’investir pleinement, chacun en ce qui le concerne, en vue de la parfaite mise en œuvre de ces mesures dans tous les établissements de ces deux régions du Cameroun».

Au-delà de l’augmentation des heures de cours, le Minesec a aussi annulé le 3 mars dernier, les congés de Pâques pour les élèves des classes d’examen.

Pour sauver l’année scolaire des élèves des régions du Nord-Ouest et du Sud-Ouest, le gouvernement camerounais n’est pas resté les bras croisés. L’école a repris, à la grande satisfaction de l’ensemble de la communauté éducative. Mais, suite au mouvement de grève des enseignants ayant perturbé le bon déroulement des cours pendant les derniers mois, Jean Ernest Masséna Ngalle Bibéhé, ministre des Enseignements secondaires (Minesec), a pris des mesures fortes pour récupérer les heures d’apprentissage perdues par ces enfants.

Dans un communiqué rendu public le 3 mars dernier, le chef de département prescrit la poursuite des cours de rattrapage qui ont débuté depuis quelque temps dans la section anglophone. Le ministre exige aussi l’augmentation hebdomadaire de 17 heures de cours dans la partie anglophone pour la période allant du 6 mars au 13 mai prochain. Notamment deux heures de plus lundi, mardi, jeudi et vendredi. Trois heures mercredi et six au cours de la journée de samedi. Dans la même foulée, le ministre des Enseignements secondaires prescrit aussi le déroulement des cours pendant tous les congés de Pâques pour les élèves des classes d’examen. Du coup, les congés du deuxième trimestre compris entre le 31 mars et le 17 avril prochain ne leur seront pas de tout repos. Les apprenants des classes intermédiaires vont être sur les bancs pendant une des deux semaines de repos.

Toujours dans le même communiqué, Jean Ernest Masséna Ngallé Bibehè, « invite tous les membres de la communauté éducative à s’investir pleinement, chacun en ce qui le concerne, en vue de la parfaite mise en œuvre de ces mesures dans tous les établissements de ces deux régions du Cameroun».

Au-delà de l’augmentation des heures de cours, le Minesec a aussi annulé le 3 mars dernier, les congés de Pâques pour les élèves des classes d’examen

Pour sauver l’année scolaire des élèves des régions du Nord-Ouest et du Sud-Ouest, le gouvernement camerounais n’est pas resté les bras croisés. L’école a repris, à la grande satisfaction de l’ensemble de la communauté éducative. Mais, suite au mouvement de grève des enseignants ayant perturbé le bon déroulement des cours pendant les derniers mois, Jean Ernest Masséna Ngalle Bibéhé, ministre des Enseignements secondaires (Minesec), a pris des mesures fortes pour récupérer les heures d’apprentissage perdues par ces enfants.

Dans un communiqué rendu public le 3 mars dernier, le chef de département prescrit la poursuite des cours de rattrapage qui ont débuté depuis quelque temps dans la section anglophone. Le ministre exige aussi l’augmentation hebdomadaire de 17 heures de cours dans la partie anglophone pour la période allant du 6 mars au 13 mai prochain. Notamment deux heures de plus lundi, mardi, jeudi et vendredi. Trois heures mercredi et six au cours de la journée de samedi. Dans la même foulée, le ministre des Enseignements secondaires prescrit aussi le déroulement des cours pendant tous les congés de Pâques pour les élèves des classes d’examen. Du coup, les congés du deuxième trimestre compris entre le 31 mars et le 17 avril prochain ne leur seront pas de tout repos. Les apprenants des classes intermédiaires vont être sur les bancs pendant une des deux semaines de repos.

Toujours dans le même communiqué, Jean Ernest Masséna Ngallé Bibehè, « invite tous les membres de la communauté éducative à s’investir pleinement, chacun en ce qui le concerne, en vue de la parfaite mise en œuvre de ces mesures dans tous les établissements de ces deux régions du Cameroun».

[https://www.cameroon-tribune.cm/article.html/7165/en.html/education-dans-le-nord-ouest-le-sud-ouest-operation-rattrapage 2/](https://www.cameroon-tribune.cm/article.html/7165/en.html/education-dans-le-nord-ouest-le-sud-ouest-operation-rattrapage%202/)

# Limbe: 50 Shops Burnt In Limbe Market

By DIDDI Aissatou 03 Avril 2017

The incident caused the South West Chief Executive to go to Limbe. Though without loss of human life, at least 50 shops containing fowls, spices, palm oil, egusi, and much other food stuff have been razed to ashes in the night of Thursday breaking Friday (30-31 March) in the central Limbe Old Market. It was the second consecutive day Limbe was suffering from market arson as the neighbouring Limbe New Market had lost some four shops a night before to flames. The incident, as grievous as it was, caused the South West Governor, Bernard Okalia Bilai, to mobilise to the Limbe Market Friday afternoon especially as the suspect, through the help of the Limbe Council Vigilante group, had been caught and detained in the Limbe Central Police Station. Sources say the suspect was caught with fire-lighters and petrol at about 3 am Friday as he lit the last shops. The Limbe fire-fighting Brigade could only save the situation from escalating beyond the 50 shops burnt. The Governor was startled at the revelations of the suspect whose names were gotten as Suh Fuenwi Paul Vincent. The suspect avowed to the Police he was on a paid mission from Bamenda to burn shops that are opened during ghost towns. He went further to say he had been paid an advance of CFA 50.000 for the job. The Chief Executive of the South West Region told the press there would be no tolerance of such acts that terrorise the population.

[**https://www.cameroon-tribune.cm/article.html/7315/en.html/limbe-50-shops-burnt-in-limbe 1/1**](https://www.cameroon-tribune.cm/article.html/7315/en.html/limbe-50-shops-burnt-in-limbe%201/1)

# Anglophone crisis: Catholic, PCC, CBC Leaders Summoned to Court By Erick Maville, Directeur Général De L’association Santé En Entreprise (SEE) 18 Avril 2017

Consortium of Parents with children in some mission academic schools claim FCFA 150 billion from respective officials accused for refusing to teach their children. Anew development has emerged in the anglophone crisis with some church leaders and college principals summoned to appear before the Bamenda and Buea courts of 1st instance on April 21st, 2017. The direct summons at the request of a certain consortium of parents whose children are in some mission academic institutions want the Catholic Archbishop of Bamenda His Grace Cornelius Fontem Esua along with the president of the provincial Episcopal conference His Lordship George Nkuo, the principals of Sacred Heart college, St Bedes college and our Lady of Lourds college, the Executive President of the Cameroon Baptist Convention (CBC) Rev. Ncham Godwill and the Moderator of the PCC to answer charges which include.; failure to ask parents to send their children back to school or to cause the deposit of school fees paid into an escrow account despite notice serve on March 3rd, 2017, refusal to either teach, feed or accommodate their children or refund school fees collected for the purpose. The charges also include failure to pay the salaries of teachers with the consequences that the State is deprived of necessary tax deductions, attempts to justify grievances and apprehension carried out against the security of the State and the signing of a joint communique on February 9th, 2017 to the effect that non resumption of schools is as a result of an unsolved political problem, thereby condoning organized resistance. The said consortium of parents acting through Colonel Tamabang, Lt.Col. Terence Sama and Lt. Loh Yai claims the sum of FCFA 150 billion from the respective church leaders in special and general damages. Communique and announcements on the subject were prominent on Easter Sunday, 16th April 2017. A communique issued by Archbishop Cornelius Fontem Esua and announcements by the CBC church leaders were read in churches in Bamenda. It was all about calls for special prayers with church leaders stating preparedness to appear in Court to answer charges. [https://www.cameroon-tribune.cm/article.html/7825/en.html/anglophone-crisis-catholic-pcc-cbc-leaders-summoned-court 1/](https://www.cameroon-tribune.cm/article.html/7825/en.html/anglophone-crisis-catholic-pcc-cbc-leaders-summoned-court%201/)

# Situation dans le Nord-Ouest et le Sud-Ouest: il faut que les blocages cessent !

By 03 Mai 2017

Le message des évêques du Cameroun délivré à l’issue des travaux de leur 42e Assemblée plénière tenue à Yaoundé. « Au Peuple de Dieu qui est Cameroun, À toutes les personnes de bonne volonté « Je vous exhorte donc, moi le prisonnier du Seigneur, à marcher d'une manière digne de l'appel qui vous a été adressé, vous efforçant de conserver l'unité de l'esprit par le bien de la paix. Il y a un seul corps et un seul Esprit, ... Un seul Dieu le Père de tous, qui est au-dessus de tous, et parmi tous et en tous » (Eph 4, 1 - 6) 1/ Depuis les indépendances, les Camerounais ont reçu le défi de bâtir avec intelligence et sagesse une Nation assumant à la fois leurs héritages aussi bien coloniaux que traditionnels. Cette construction de la Nation n'est pas finie. Elle a connu des soubresauts de toutes natures. 2/ Depuis octobre 2016, les Régions du Nord-Ouest et du Sud-Ouest vivent une situation délicate qui a commencé par la grève initiée par les Avocats suivis en novembre par divers syndicats des enseignants avec des conséquences néfastes ayant conduit à l'arrêt des cours, des violences diverses, des arrestations, des villes mortes, des atteintes aussi bien sur les biens que sur des personnes. Bref une crise sociale dont l'impact est très négatif sur les plans économique, éducatif et du vivre ensemble. Lors de la tenue du Conseil Permanent du 06 décembre 2016, et du 40ème Séminaire des Evêques à Mamfe, nous avions déjà appelé les différents protagonistes à un dialogue franc et sincère. Les Evêques de la Province Ecclésiastique de Bamenda ont également pris position à ce propos, invitant toutes les parties au dialogue. 3/Réunis pour notre 42e Assemblée plénière à Yaoundé, du 23 au 29 avril 2017, Nous, Evêques du Cameroun, avons une fois de plus examiné la situation de crise sociale qui prévaut dans les Régions du Nord-Ouest et du SudOuest. Cette situation devient de plus en plus préoccupante et préjudiciable à toute la Nation. 4/ L'Eglise, famille de Dieu au Cameroun, chemine solidairement avec le destin de nos frères et sœurs, nos enfants, tous nos concitoyens qui connaissent des situations difficiles. «Jésus-Christ est notre Réconciliation, notre Justice et notre Paix». Nous, Evêques du Cameroun, avons mission de veiller à servir organiquement la réconciliation, la justice et la paix en chaque personne, en toute notre Nation, en toutes ses Régions. C'est le témoignage de l'Eglise qui est ici engagé, par le courage de la foi, par la vivante espérance porteuse d'avenir et de paix, pour résister à toutes les menaces de dissolution et de désagrégation du vivre-ensemble de la Nation pour revenir à l'apaisement et à la communion par le dialogue et la concertation. Reconnaissant l'Etat de droit et gardant la fidèle mémoire de la manière dont cet Etat a toujours favorisé toute l'expression de la foi des croyants et leur contribution à l’édification de la Nation, Nous nous sommes engagés avec zèle depuis les évènements qui affligent les Régions du Nord-Ouest et du Sud-Ouest, à promouvoir une recherche de solutions aux questions posées et au retour à un mieux vivre-ensemble. Dans l'état actuel des choses, Nous, vos Evêques, estimons moralement nécessaire la poursuite de cet engagement. Nous exhortons les parties concernées à continuer le dialogue et à privilégier la recherche des solutions institutionnelles et humaines. Nous appelons tous nos compatriotes à s’unir pour poursuivre ensemble l'édification de notre Nation et pour construire son unité. Pour l'heure, il convient de poursuivre la voie de la décentralisation totale de nos institutions «qui vise la promotion du développement, de la démocratie et de la bonne gouvernance au niveau local» (loi de 2004) ; et partant consolide l'unité dans la diversité, le vivre-ensemble avec nos héritages reçus, le dialogue pour l'intérêt commun et la démocratie. 6/ Pour cela, ce dialogue est important et nécessaire. Il est la valorisation du patrimoine des valeurs sociales et éthiques communes aux différentes traditions sociales et culturelles, afin de faire participer le citoyen à la consolidation du bien commun, de la justice et de la paix. Il ne s'arrête pas seulement à ce que nous avons en commun ; mais il tend vers le plus haut point de l'unité. Pour être efficace, ce dialogue doit être clair, animé d'un respect sincère pour les autres et d'un esprit de réconciliation, de fraternité et de compromis, Ce dialogue permet de surmonter efficacement les crises sociales et vise le vivre-ensemble, dans la solidarité et dans la paix. 7/ Un tel dialogue concerne l’Etat dans sa forme institutionnelle qui assure les trois pouvoirs : l'Exécutif, le Judiciaire, le Législatif. Il concerne aussi tous les Corps intermédiaires, Partis politiques, Syndicats, Communes et Société civile. Le but de ce dialogue, ainsi organisé, est de promouvoir la paix, la justice, la démocratie et le bien-être ; et de combattre les inimitiés, les rivalités, les conflits. Ainsi, à tous les niveaux, que tous engagent la réconciliation des droits et des devoirs, la réconciliation de la mémoire de la Nation et de la vision de son avenir. En tout, que l'Etat de droit soit privilégié comme étant la forme institutionnelle globale compétente pour la conception et l'organisation de la Nation. 8/ En ce qui concerne les problèmes relatifs à la situation actuelle des Régions du Sud-Ouest et du Nord-Ouest, compte tenu de l'évolution de la nature des problèmes, au début de type syndical, et maintenant plus politique, administratif et constitutionnel, nous devons rechercher l'intérêt supérieur de la Nation. Il importe, pour le bien et la stabilité de notre pays, que soient respectées la subsidiarité et la solidarité institutionnelles qui affectent chaque problème posé à son organisme compétent, tout en prenant en compte les avis pertinents, formellement émis par les personnes privées et morales. Que chaque organisme d'Etat, des Corps intermédiaires et de la Société civile prenne ses responsabilités et agisse selon sa compétence légale. Qu'un traitement institutionnel soit donné à ces problèmes qui en réalité, affectent la Nation toute entière, 9/ Autant les problèmes sociaux sus-évoqués sont importants et urgents, autant la préservation des relations humaines et le vivre ensemble est nécessaire. Au nom de la citoyenneté, de la fraternité humaine et de l'humanité, la défense des intérêts légitimes doit aller de pair avec la concorde sociale qui est le but recherché. Les violences non seulement provoquent des dégâts, mais aussi radicalisent les parties et empêchent l'avènement d'un mieux-être ! La violence, d'où qu'elle vienne, ne construit pas ; elle détruit ! C'est pourquoi nous recommandons que les méfiances et les soupçons, la désobéissance civile, les arrestations arbitraires, les intimidations de toutes sortes, les pressions pour conquérir tel ou tel droit, les blocages, les menaces d'activités cessent. Dans cette perspective, nous invitons tous les protagonistes de cette crise à une véritable réconciliation des cœurs. 10/ Au sujet des écoles, Nous, Evêques, réaffirmons que l'école fait partie intégrante de la mission de l'Eglise, Mère et Educatrice. Nous confirmons le droit inaliénable à l'éducation reconnu à toute personne humaine. Nous invitons, par conséquent, les parents à prendre leur responsabilité à envoyer les enfants à l’école pour leur donner la chance de réaliser leur projet de vie. Nous appelons l’Etat à garantir les conditions de sécurité nécessaires à l’activité scolaire, à prendre des mesures spéciales pour des subventions spéciales et pour alléger les charges fiscales et taxes diverses qui pèsent sur les écoles depuis le déclenchement de la crise. L'assignation des Evêques de la Province Ecclésiastique de Bamenda en justice est inopportune et contreproductive, surtout en ce moment grave où tout le Cameroun' est mobilisé pour une solution rapide et pacifique de la crise. - Que les cours reprennent dans tous les établissements primaires, secondaires et universitaires ; - Que les grèves, les villes mortes et les tracasseries cessent ; - Que les prévenus voient leur sort clarifié, selon un discernement judiciaire et approprié; - Que les négociations s'intensifient et s'accélèrent pour que des réponses urgentes soient données aux problèmes posés notamment celui des avocats, et entre autres le respect de la Constitution, l'accélération de la Décentralisation et une sécurité citoyenne par les Forces de l'ordre. 11/ A cette heure grave de l'histoire de la Nation, ce qui importe c'est le bien-être de tous les Camerounais. Nous les appelons à la solidarité et à la recherche de la confiance mutuelle. Nous lançons un vibrant appel à l’unité et à la paix véritable. L'Eglise, quant à elle, en vertu de sa mission prophétique, a à favoriser, par son pouvoir, toutes les formes de médiation qui s'imposent, qui émergent ou qui tardent à s’exprimer. Eveiller, accompagner et servir le dialogue, telle est sa mission pour le bien de la Nation. 12/ A tous les croyants et aux hommes de bonne volonté s’imposent la formation des consciences. - Que cessent toutes prédications incitant à la haine, à la vengeance et à la désobéissance publique. _ Que soit promues la culture de la paix, et de la fraternité ainsi que la civilisation de l'amour. 13/ Aux hommes de médias et utilisateurs de nouvelles technologies de communication, l’éthique professionnelle impose de respecter la déontologie du Corps des professionnels : - Que cesse la propagation de la haine, de la violence et des fausses nouvelles dans les Communications sociales, qui inévitablement conduiront au chaos ! - Que tous les citoyens unissent leurs forces pour la vie et la stabilité de la Nation ; qu'ils opposent une digue au Mal de la division, de la discrimination et de la déstabilisation qui veut détruire notre pays ! - Que soient écartés tous les dissentiments et qu'avec une concorde mutuelle, une confiance réciproque et surtout une grande charité, on suscite des solutions institutionnelles fondées sur des valeurs humaines et citoyennes! - Que cette entreprise historique et noble soit menée avec les moyens efficaces que sont le tact, la prudence et la magnanimité ! « Tous nous désirons la paix, beaucoup de personnes la construisent chaque jour par de petits gestes. Engageonsnous par la prière et l’action, à devenir des personnes qui ont banni de leur cœur, de leurs paroles et de leurs gestes, la violence, et à construire des Communautés non-violentes, qui prennent soin de la maison commune. Rien n'est impossible si nous nous adressons à Dieu dans la prière. Tous nous pouvons être des artisans de paix) J. Pape François. 14/ Aux fidèles chrétiens et à tous les autres croyants. - Priez intensément pour la justice, la réconciliation, la paix, et l'unité de notre Nation ! - Que la lumière du Christ ressuscité rayonne dans nos cœurs et sur nos visages ! _ Que Dieu Tout-Puissant donne à toute la Nation de vivre ensemble dans la quête de la vie en abondance pour tous ! - Que la Vierge Marie Patronne de notre pays nous accompagne aujourd'hui et toujours! » Fait à Yaoundé, le 29 avril 2017 Pour les Evêques du Cameroun (é) Samuel KLEDA Archevêque de Douala, Président de la CENC

[**https://www.cameroon-tribune.cm/article.html/8369/en.html/situation-dans-le-nord-ouest-le-sud-ouest-il-faut-que-les-blocages-cessent 1/4**](https://www.cameroon-tribune.cm/article.html/8369/en.html/situation-dans-le-nord-ouest-le-sud-ouest-il-faut-que-les-blocages-cessent%201/4)

# Bamenda: Assaulted Student Evacuated To Mbingo Baptist Hospital By Erick Maville, Directeur Général De L’association Santé En Entreprise (SEE) 08 Juin 2017

Government bankrolls health bills of 17 year-old female student stabbed by masked people on a motorcycle CarreSocial media spread information on Monday June 5, 2017 to the effect that a student 17 year-old Anyere Chatelle of GBHS Ntamulung had been butchered in the neighbourhood of GBHS Ntamulung, Bamenda. The Principal of GBHS Ntamulung, Patrick Nkwenti, later confirmed to Cameroon Tribune (CT) that the student was on her way to school with two others for revision classes ahead of the 2017 session of the GCE examinations when she was assaulted before being rushed to the Bamenda Regional hospital. The Director of the Bamenda Regional Hospital, Dr Kinge Thompson Njie has made an update on her situation in which he said Anyere Chatelle was received at the hospital and given immediate treatment but later evacuated to the Mbingo hospital to meet a Surgeon for necessary bone surgery. It should be recalled that Anyere Chatelle was on her way to school with some friends for revision studies ahead of the GCE examinations when suddenly some masked people on a motorcycle appeared and started inflicting wounds on her using a machete. “They inflicted three deep wounds on her upper hand which caused a fracture of the radial bone”, Dr Kinge noted. He also said there is hope she will recover fully because her wounds are not life threatening and they are wounds that will not even affect her beauty. Dr Kinge Thompson use the opportunity to thank the Director of Cabinet at the Prime Minister’s office, Minister, Prof. Ghogomu Paul Mingo who sent word that the government will handle all the bills in the Bamenda Regional Hospital and Mbingo Baptist hospital. The message has been transmitted to the family of the student and both the student and parents have extended gratitude. He stressed that the gesture from the government is relieving to the family.

[**https://www.cameroon-tribune.cm/article.html/9209/en.html/bamenda-assaulted-student-evacuated-mbingo-baptist-hospital 1/1**](https://www.cameroon-tribune.cm/article.html/9209/en.html/bamenda-assaulted-student-evacuated-mbingo-baptist-hospital%201/1)

# Buea University: SYNES President In Buea Calls Off Strike

By DIDDI Aissatou 27 Mars 2017

His call for University resumption was announced at a press conference in Buea last Friday. The South West Regional capital city of Buea was taken by storm last Friday, 24 March, 2017, when the President of the University of Buea chapter of the National Syndicate of Lecturers of Higher Education (French acronym, SYNES), Professor Abangma James Arrey, announced at a press conference that he was calling off the strike action that had kept students out of campus for four months. The press conference was organised at the Chariot Hotel in Buea at 3pm. During the conference, Professor Abangma James Arrey who had been unseen all this while emerged to declare the lecturers’ strike over. Prof. Abangma equally explained to the press some requests they have put to Government to fulfil immediately lest they would consider calling back the strike. The demands include that Internet be restored to Anglophone Cameroon and that their syndicate members should be released from detention. Professor Abangma, as President of SYNES, UB chapter, was accompanied by his Vice, Dr. Martin Sango Ndeh. Professor Abangma’s move has brought hopes to shine over the 20.000 UB-community whose academic year was already attracting doubts as to how it would end. Even the undergraduate batches of last year supposed to have graduated last December 2016 are having their expectation rekindled. Abangma has been out of sight for months after the Teachers’ strike was declared in November last year. Although now seen to be leaning on crutches, the learned Professor of Political Science specialised in Public Administration says he sustained a knee injury as he escaped from the security forces before taking to the woods. He says his family is still where he was with them. Professor Abangma James Arrey: “It Is Sometime Necessary To Take A Step” SYNES President, UB chapter What has prompted your action calling off the strike that has been going on for the past four months? The initiative came when we were somewhere in hiding. It came from a government official. We look at it with some suspicion; we thought it was a way of getting us arrested. After sometime we realised that they still needed to throw off this crisis that has been hanging on for some time. We accepted the negotiations and in accepting the negotiations we had the conviction that in the event of a stalemate it is sometime necessary to take a step. What does the step you are taking now imply? We went away from the common opinion of Anglophone activists that the State must fulfil certain demands before calling off the strike. We decided that we call off the strike and then give our request to the State. As such, we took the opposite direction calling it off before asking the State to grant our request. So, what is your request from the State? We asked for the release of our members who are under arrest like Dr. Fontem Neba and Barrister Agbor Balla. They are all lecturers of UB and members of SYNES. We also asked for the release of our students and the release of some other members of the public to provide an enabling environment. We realised that the reason why we went so far to the members of the public is that there is so much tension in the air with people being under detention. The release of these people would quell the tension. Otherwise, is this action calling off the strike not coming too late in the school year? We have requested for the extension of the academic calendar. A readjustment of the academic calendar, among other points, will also create an enabling environment. We requested for the restoration of Internet facility in Anglophone Cameroon so as to facilitate learning, teaching and research. We requested that it should be done immediately to start academic work. Professor, so tomorrow (today) you will be in the amphitheatre of UB teaching? The executive members of SYNES will be in the University of Buea teaching and we have also asked students to organised themselves to begin studies. Are you aware of what was happening in the University during this period of strike? Just a few Francophones were going to classes. Even the teachers who couldn’t teach before because of language problems were in the classrooms struggling to teach and we found it very funny. There were many illegitimate activities ongoing at the University of Buea campus. Sometimes they changed the names of supervisors; they used people who are not even qualified for academic defences. We also found that it was necessary to put an end to these practices. Above all, in the case of a strike all of us are supposed to sit at home but we found some of our colleagues going to mark the attendance sheet and feeling attendance lists and doing other activities in the absence of their leaders. So this was not also welcome by us. You have called off this strike which has lasted so long, is it just within the University of Buea or it involves the national scope of the syndicate? It is within UB that we are calling off this strike because we can’t control the national level. But what we feel is that there should be a genuine dialogue with the rest of the group. We have been holding meetings with the rest of the group, we can direct the dialogue and we can propose some solutions. SYNES is a national body. Is your national president aware of this move that you took to call off the strike in UB last 24 March? Within SYNES we have campus activities and national activities too. But our action was within a segment of the society, within the Anglophone region. And this did not concern the whole of SYNES. So it was a local problem. Last 24 March when you held the press conference at Chariot Hotel in Buea, how many of you SYNES members were present? Apart from me and my vice president, there was no Lecturer. But four of us took the executive decision. It has become a dangerous position to take. We tried to organise the general assembly but many members were afraid because of heightened security because these days anybody can be taken to Yaounde. Our members avoided the risk. I just sampled the opinion of friends and the decision is almost an executive decision. In actual fact it was the general assembly that was supposed to give its permit for the strike to be called off.

[**https://www.cameroon-tribune.cm/article.html/7072/en.html/buea-university-synes-president-in-buea-calls-off-strike 1/3**](https://www.cameroon-tribune.cm/article.html/7072/en.html/buea-university-synes-president-in-buea-calls-off-strike%201/3)

# Bamenda: Progressive Resumption Of Schools

By Erick Maville, Directeur Général De L’association Santé En Entreprise (SEE) 05 Sept. 2017

Day one of the 2017/2018 academic year started in Bamenda with few pupils and students showing up in special circumstances that featured stepped up security. Resumption of schools for the 2017/2018 academic year on September 4, 2017 showcased different phases in the North West region. Teaching and learning in examination classes resumed two weeks earlier in virtually all the Presbyterian Secondary Colleges in Bamenda and neighbourhoods. Meanwhile, Sacred Heart college and Our Lady of Lourdes College, Mankon started receiving students into hostels yesterday, 4th September. Elsewhere, Ecole De Champion primary and Nursery school in the neighbourhood of Up Station, Bamenda I Sub Division enrolled 70 of the expected 350 pupils on day one. The same neighbourhood featured 86 of the expected 500 pupils in St Bridget’s Primary and Nursery school while Ecole publique Francophone was more impressive on day one. Down town Bamenda, featured 10 out of 50 and 8 out of 56 in some classes at the Old town-based GBS Complex. Teaching and learning was also effective with a few in students in GBHS Down of Town where the Principal, Nditafon George although revealed that there were over 200 students. In the short and long of it, Bamenda and neighbourhoods featured very few school uniforms on day one of schools resumption where the gates of many lay private schools were open without pupils. Other schools and colleges featured more parents who went to ascertain the effectiveness of schools resumption before deciding to enrol their children. Away from that, virtually all the public schools and colleges received administrative and teaching staff while some private schools spent day one mobilizing to begin registration of pupils. From the look of things, ghost town calls for September 4-6, 2017 did not help matters for schools resumption in the region

[**https://www.cameroon-tribune.cm/article.html/11687/fr.html/cameroon-tribune 1/1**](https://www.cameroon-tribune.cm/article.html/11687/fr.html/cameroon-tribune%201/1)

# South West: BIR Nurtures School Resumption

By 04 Sept. 2017

They donated benches and other didactic materials to facilitate school return. The Rapid Intervention Battalion (BIR) has taken a step higher to increase the drum-beats for the need for pupils and students in Anglophone Regions to join their peers on September 4 nationwide to resume school. Elements of the Idenau BIR Zone were on Thursday August 31, 2017, in Bamusso of Ndian Division to encourage parents on the importance of education and the need for classroom doors to be opened for the new academic year. Pupils and students were equally told to show up at their various learning centres on September 4 as it is grounds where their futures are being molded. Colonel Tetcha Felix, Chief of Staff of BIR Coast Guard, who led the Idenau BIR Zone delegation, told the Bamusso Community that their principal job is security but they can’t fold their arms seeing the future of school goers at a halt. “Education is the key stone to the future of the republic and we want to encourage you parents to send your children to school on Monday during class resumption,” he told parents and students who shouted yes in choruses. To indicate their commitment for school resumption, the Idenau BIR Zone took with them 20 benches, 3 cartoons of exercise books, 5 packets chalk, 2 packets pen, 6 packets pencil and 4 reams of paper to the Bamusso Municipality. Etongo Grace Mbeng, Mayor of Bamusso, said the gifts from the BIR are a gesture that will enhance learning in the 20 schools in her municipality. “When we are growing old, it is you children that should take our place. And this can only be done by you acquiring education,” she told the pupils and students at the Bamusso Community Premises. She celebrated the released of the Anglophone detainees by President Paul Biya which she said will facilitate school reopening. HRH Chief Motomba Alex N. D. III, traditional ruler of Bamusso, said he has been crisscrossing the entire Bamusso Municipality to encourage parents to send their children back to school and all through he met with one demand from the parents, the release of the Anglophones in detention.

[**https://www.cameroon-tribune.cm/article.html/11624/en.html/south-west-bir-nurtures-school-resumption 1/1**](https://www.cameroon-tribune.cm/article.html/11624/en.html/south-west-bir-nurtures-school-resumption%201/1)

# South West: Generalised Mobilisation For Classes To Resume

By Richard Kometa 03 Sept. 2017

Across the six administrative Divisions of the Region, the call is in favour of education. As school bells ring across the South West Region, the various education stakeholders are aware of the various roles expected of each actor to enable school going. Education actors have put hands on the plough to fight the classroom drought witnessed in Anglophone Cameroon since 21 November, 2016. To overturn the tables and assure that this year does not resemble the previous one in ghost schools, Governor Bernard Okalia Bilai set the tone early August with a school resumption inaugural campaign meeting held in his office with all six Senior Divisional Officers of the South West Region in attendance. Administrators, politicians, educationists, traditional rulers, religious, parents, pupils and students were sensitised on sectorial and individual roles to play. From thence kicked off a generalised mobilisation in the South West for school reopening this 2017-18. In Lebialem Division, the new Senior Divisional Officer, Ungitoh Zachary Cheikoh, initiated a multi-sector meeting leading to the resolutions by Mayors of Fontem, Alou and Wabane agreeing to intensify clearing of grass-invaded schools. They also decided to provide minimum school packages by 30 August, 2017. Traditional rulers of the area consented to use gongs and messengers to call for school return, educate parents to accompany their children to school within the first week of resumption and report any case of disturbance to the Administration. Political party representatives of SDF and PAP in Lebialem called for the release of detained personalities in Yaoundé. The CPDM resolved to use party forums to sensitise on school resumption. They nevertheless sued for meaningful dialogue to end the Anglophone crisis. The religious circles vouched to intensify prayers and use their pulpits to drum school reopening come 4 September. In Indian Division, Mbokaya Ashu, Senior Divisional Officer, summoned a come-together urging parents to shun fear and mobilise for school return. The Administrator involved the elite to mobilise for school reopening on 4 September explaining the importance of education for young people. In Manyu Division, politicians multiplied calls for school return in churches, markets and party meetings. Under Minister Mengot Arrey Nkongho, the people of Manyu were rallied in the Mamfe Town-hall on 26 August to spread the message of school return. In Kupe Muanenguba, the elite from Yaounde including Ministers Elung Paul Che and Ngole Ngwese Philip combed through Tombel and Bangem to mobilise for school resumption on 4 September. In Tombel the youth remarkably thronged the streets defying calls for boycott and reminding parents and authorities that they need education for their own future. In Meme Division, the Senior Divisional Officer, Ntou’ou Ndong strategised with parents and the elite to ensure that schools resume on 4 September and respect the official calendar. He even organised a football competition as a means to sensitise the youth on the need to go to school. In Fako Division, Honorable Etombi Gladys of the Fako East Constituency has toured Muyuka, Bimbia, Mukundange and Limbe Central on 28 August to distribute books for pupils to resume classes next Monday. Observers acclaimed her’s as a practical approach to encourage school resumption because the markets and shops are not yet exposing school needs for purchasing. On his part, Senior Divisional Officer, Engamba Emmanuel Ledoux, convened a meeting of education stakeholders last week to invoke school return. Speaker after speaker proposed actions to undertake to include that parents should accompany their children to school. Importantly, traditional rulers were urged to organise vigilante groups in the various villages to weed out ghost school protagonists. During the meeting, a popular personality, Senator Mbella Moki, called for vigilance and rational occupation of the vandal-space between schools and homes where school goers are threatened. Meanwhile the Buea Council has organised a month-long holiday classes to level-up students for school this time. A Divisional Delegate, mother and teacher by profession, Mrs Martina Tambe, questioned why some Anglophone parents are now taking their children to francophone Regions and coming back to enforce ghost schools in South West and North West. She argued that if it is a question of culture then which culture are they now inculcating in their children? To speak the least, all cameras and radars from far and near seem focused on Anglophone Cameroon to see who would throw the first stone against school going this time.

[**https://www.cameroon-tribune.cm/article.html/11584/en.html/south-west-generalised-mobilisation-for-classes-resume 1/2**](https://www.cameroon-tribune.cm/article.html/11584/en.html/south-west-generalised-mobilisation-for-classes-resume%201/2)

# Government-Teachers Dialogue: Resolved To Start School Year Peacefully

By YAFE 31 Août 2017

Below is the press release from the sixth ordinary session of the inter-ministerial committee in charge of examining and proposing solutions to the preoccupations raised by teachers’ trade unions. Chaired by its President, the Minister of Higher Education, Chancellor of the Academic Orders, the interministerial committee in charge of examining and proposing solutions to the preoccupations raised by the teachers Trade Unions had a working session on Tuesday 29th of August 2017 in the conference room of the Ministry of Higher Education beginning at 11:30a.m. The working session was essentially focused on the preparation of the National Education Forum and the problems linked to preoccupations of teachers at the eve of the resumption of the 2017-2018 school year. The Agenda had two main points: on one hand, preparations towards the reopening of schools and on the other hand, the organisation of the National Education Forum announced for the month of December 2017. Participants : - The Minister of Basic Education -The Minister of Employment and Professional Training -The representative of the Minister of Secondary Education -The representative of the Minister of Sports and Physical Education - The representative of the Minister of Youth Affairs and Civic Education -The Representative of the Minister of Public Service and Administrative Reforms -The Technical Adviser of the Prime Minister in charge of Education and Research - The Coordinator of the Technical Secretariat of the Committee - A Chargé de Mission at the General Secretariat of the Prime Minister’s Office - 23 representatives of the teachers Trade Unions for the Primary, Secondary and Higher education of both the Anglophone and francophone sub systems. In his opening speech, while welcoming his colleagues, members of Government together with all the participants, the Minister of Higher Education congratulated the dynamism of the committee which serves as a veritable platform for concertation and an open forum to all the members of the educative community. The examination of the preoccupations raised by legalised Trade Unions had at times led to urgent and concrete actions geared towards teachers demands. At the same time the realism which prevailed during the working session imposed on all the parties present to set aside the questions whose complexity requires a thorough examination, backed by a broad consultation including aspects which required substantial financial expenses. With regard preparations towards schools reopening, the participants listened to the announcements of the Ministers of Basic Education, Employment and Professional Training, the representatives of the Ministries of Secondary Education, Sports and Physical Education respectively. It is clear from these interventions that the reopening of schools is on a good footing in spite of certain challenging behaviours whose sources otherwise circumscribed are external to the educational milieu. Items deemed to be of concern were opened for discussion, and solutions were proposed. These include: c The putting in place by the Government, under the highest instructions of the Head of State an emergency intervention program amounting to more than four billions FCFA to enable schools that were shot down because the action of the terrorist sect BOKO HARAM to reopen and function under good conditions; c Making available teachers in refugee camps of the Adamawa, East and Extreme North Regions; c The organisation of catch up classes in favour of children of the North West and South West Regions; c The mobilisation of administrative authorities, forces of law and order, municipal authorities, elite, trade unionists, in view not only of reinforcing security around schools and Universities but also to mobilise parents and stake holders; c The construction, rehabilitation and equipment of several classrooms in Government primary and secondary schools; c The release by the Minister of Commerce of measures with the objective of avoiding speculations in the prices of books and didactic material at the dawn of the 2017-2018 school year; c The amelioration of infrastructural facilities in public Higher Education institutions, particularly in the Universities of Bamenda, Buea, Maroua and Douala; c The full payment of the second part of the Special Modernisation University Research Grant in favour of teachersresearchers and dispositions are underway in the Ministry of Finance for the payment of the third part. Other preoccupying issues to the trade Unions, were after, open debate resolved consensually and pragmatically. The National Education Forum which constitutes the venue of the thorough examination of teachers concerns and the concerns of our educational system is actively being prepared. The elaboration of technical documents is going on at the same time as the committee continues to study all preoccupations raised by the trade unions for a thorough examination without complacency. In order to accelerate the preparatory process with a better mastery of the academic calendar, the committee decided on holding regular monthly sessions. At the end of the working session, while welcoming the quality of documents examined and the good mastery of the preparatory process of the National Education Forum, the President of the Interministerial Committee invited all the members to maintain the same commitment for the success of the Forum and advised them to follow the path of dialogue and concertation which are true vectors of peace and social cohesion. All the participants took the firm commitment to take every action to ensure that the start of the next school year takes place in an atmosphere of peace, calm and serenity. Signed: - The Minister of Higher education - The Minister of Basic Education; - The Minister of Employment and Professional Training; - The representative of the Minister of Secondary Education; - The representative of the Minister of Sport and Physical Education; - The representative of the Minister of Public Service and Administrative Reforms; - The technical adviser at the prime Minister office in charge of education and research; - The coordinator of the technical secretariat of the committee; - A senior advisor at the secretariat general of the Prime Minister office; - Le Syndicat National Autonome de l’Enseignement Supérieur (SNAES) ; - The Baptist Teachers Trade Union of Cameroon (BATTUC) ; - The Catholic Education Workers Trade Union (CEWOTU); - Le Forum des Enseignants et Chercheurs des Universités d’Etat du Cameroun (FOREC) ; - The Cameroon Teachers Trade Union (CATTU); - L’Organisation Nationale des Enseignants du Cameroun (ONEC) ; - The Presbyterian Education Authority Teachers Trade Union (PEATTU); - The Teachers Association of Cameroon (TAC). - Le Syndicat National Autonome de l’Education et de la Formation (SNAEF); - Le Syndicat National Entente des Enseignants Publics Contractuels du Cameroun (SYNAEEPCAM); - L’Observatoire Déontologique de l’Enseignement (ODE) ; - La Fédération Camerounaise des Syndicats de l’Education (FECASE) ; - L’Organisation Nationale des Enseignants d’Education Physique et Sportive (ONEEPS) ; - Le Syndicat des Travailleurs des Etablissements Scolaires Privés du Cameroun (SYNTESPRIC) ; - Le Syndicat des Enseignants du Cameroun pour l’Afrique (SECA) ; - Le Syndicat National des Instituteurs Contractuels et Maitres des Parents (SNICOMP) ; - Le Syndicat National des Enseignants du Cameroun (SYNEC). - Association des Professeurs contractuels des Enseignements secondaires pour le Partage (APCESPA) ; - Le Syndicat National Indépendant des Enseignants de Base (SNIEB); - Le Syndicat National de l’Enseignement Primaire et Maternel (SNEPMA); - Le Syndicat des personnels de la Recherche et de l’Enseignement Supérieur (SYPRES) ; - Le Syndicat National de l’Enseignement Supérieur (SYNES) ; - Collectif des instituteurs Vacataires de l’Enseignement Technique (IVET).

[**https://www.cameroon-tribune.cm/article.html/11574/en.html/government-teachers-dialogue-resolved-start-school-year-peacefully 4/4**](https://www.cameroon-tribune.cm/article.html/11574/en.html/government-teachers-dialogue-resolved-start-school-year-peacefully%204/4)

# Boyo:CPDM Youths Lead Back To School Crusade

By Erick Maville, Directeur Général De L’association Santé En Entreprise (SEE) 30 Août 2017

Boyo III CPDM Section youths create Task Force to combat threats to peace, security in neighborhoods. Education for progress and prosperity was the message on August 27, 2017 when YCPDM youths of the Boyo III Section, Fundong stated preparedness to facilitate the hitch-free resumption of schools for the 2017/2018 academic year. The event was a YCPDM Joint sections conference in the neighbourhood of Abuh where a Task Force was created with a mission to check threats to peace and security on the eve of the 2017/2018 academic year. It was also a moment for the YCPDM Section President, Ahamdou Bello to stress the importance for children to return to school after a stressful 2016/2017 academic year with some children missing out on their right to education. He hailed the youths of Abuh-Muteff villages for organizing themselves to give peace a chance for children to resume the learning process in schools. Boyo III CPDM Section President, Awoh Ndang Denis who filed out to encourage the youths of the party reminded them about the goodness of education. He said education is the hope of the youths for the future and mobilized them to ignore perpetrators of school boycott and build a future through education. The CPDM Permanent team leader for Boyo Division, Hon. Waingeh Albert Ndim also featured prominently with cheers for the youths who are poised to make their mark with initiatives that give education a chance in the backdrop of threats. It was also a moment for Section President, Awoh Ndang Denis to inspire the youths to enroll on electoral lists to feature as agents of change in future electoral exercises. Special messages equally urged parents to stand by the education of their children as the best investment towards the future.

[**https://www.cameroon-tribune.cm/article.html/11527/en.html/boyo-cpdm-youths-lead-back-school-crusade 1/1**](https://www.cameroon-tribune.cm/article.html/11527/en.html/boyo-cpdm-youths-lead-back-school-crusade%201/1)

# Back-to-School: Overcrowding in Anglo-Saxon Schools

By Priscille Moadougou 16 Sept. 2017

The Anglophone crisis has resulted in mass exodus of children to Francophone regions. Though schools are gradually going on in the Anglophone regions, the fear that they might be interrupted any time has pushed parents residing in Douala to retrieve their kids from schools in the Anglophone regions while some parents residing in the North West and South West regions have sought refuge for their kids in relations in Francophone regions. The situation has made good business for schools in the Francophone regions while those in the Anglophone regions are left to the mercy of God. In Douala, most primary and secondary schools in Bonaberi (neighbourhood where most Anglophones reside) are jammed to capacity. Private and mission schools have taken advantage of the situation to enrol more pupils and students leading to overcrowding in classrooms. While some schools used the opportunity to construct more classrooms and recruit additional teachers, others squeeze them in same classroom with no additional teacher. Schools that did not have enough students in classes have had more than enough this academic year. According to the Principal of CEGET Bonaberi, Nji Immaculate, just one week into the new school year, her school received over 500 applications for admission but they took just one hundred. “We don’t have enough infrastructure to accommodate more than 1,000 students, if we had, we would have admitted up to 1,500 students for this academic year since many came for admission,” she explained. Though there is a slight increase in the number of students in the institution than usual, she revealed that their teachers are up to the task since they carried capacity-building seminar before the beginning of school. Since the start of classes on September 4th, some schools partially resumed like the Presbyterian Secondary School Bonaberi. According to a communiqué sent to parents by officials of the institution, only Forms One, Five and Upper Sixth resumed classes while Forms Two, Three, Four and Lower Sixth will resume on September 24th. As per the communiqué, the existing infrastructure could not harbour the multitude of students admitted for the school year. They are still constructing additional dormitories and classrooms to ease teaching and learning process. The situation is no different in public schools as some bilingual schools continue to admit students even two weeks after school resumption. No matter how or where they are admitted, the lone goal students should have is hard work, a parent chipped in while selling snacks in CEGET’s school premises. Immaculate Nji: « Nous sommes plus sollicités » Principale du collège Ceget, Bonabéri-Douala Quel est le niveau de sollicitation de votre établissement cette année ? Cette année, nous avons réellement connu une plus forte sollicitation qu’à l’accoutumée. La pression s’est vraiment fait ressentir. Nous avons eu 500 demandes de recrutement que nous n’avons pas pu satisfaire, parce que nous n’avons pas eu d’infrastructures supplémentaires. Nous ne pouvions pas aller au-delà de notre capacité d’accueil. L’année dernière, nous avions dans les 900 élèves, et cette année, juste une semaine après la rentrée, nous sommes déjà à 1000 élèves. Si on avait plus d’infrastructures, on aurait pu se retrouver à plus de 1500 apprenants avant la fin de l’année. Mais là, nous sommes tenus de respecter les effectifs en classe, même comme il peut y avoir de légères variations.

[**https://www.cameroon-tribune.cm/article.html/12045/en.html/back-to-school-overcrowding-in-anglo-saxon-schools 1/2**](https://www.cameroon-tribune.cm/article.html/12045/en.html/back-to-school-overcrowding-in-anglo-saxon-schools%201/2)

# Keeping Eyes Open

By 18 Sept. 2017

Two weeks have gone past since the 2017/2018 Academic Year flung open its doors. In the three troublesome regions of the North West, South West and Far North, the dust of uncertainty is yet to completely settle. The atmosphere continues to be charged with fear; fear of the unknown. This state of affairs is, of course, not abnormal considering the pre-school crises that rocked the three regions. The situation in the Far North Region dates back to about 2014 with the resurgence of the Boko Haran insurgence. The escalation of attacks resulted in the closure of schools, some schools hosting internally displaced students, destruction of school infrastructure, barriers to school enrolment and fleeing of education personnel among others. The situation was different as concerns the North West and South West Regions. The disruption of the academic year resulted from the penetration by politicians, of the strike action organised by teachers who had as aim to enhance the English sub system of Education in Cameroon. This has yielded very negative results with children staying at home for one full academic year and a few barely succeeding to write and pass their end of year examinations. The new school year has begun albeit timidly. Most people blame the situation on insecurity. This follows acts of vandalism characterised by setting of schools into flames, threats to school authorities as well as parents. Government on its part has been assuring stakeholders of measures taken to ensure the security of schools and school children. And so, since schools resumed, forces of law and order have been stepped up around school establishments. In one of the official statements of assurance, Jean Baptiste Bokam, Secretary of State for Defence in charge of the Gendarmerie, stated inter alia that the number of Gendarmes have been increased to ensure security. Reports from the two regions talk of maximum security around schools. Not only are gendarmes present at the entrance to boarding and day schools, they remain alert in their barracks in case of any eventuality. Children who are attending classes have equally been sensitized to understand the importance of the presence of the forces of law and order in their schools. They know that it is for their own protection. That notwithstanding, many Cameroonians are still to come to terms on the low school attendance. Some parents argue that protection from the forces remains partial. Who will protect their children when they come back home? How will they be protected if attacked on their way to and from school? These are some of the arguments in favour of continues apathy among parents. These elements of scepticism ought not to be neglected, for they have serious negative impact on school resumption. Instead, security authorities are supposed to take as challenge and work towards filling this vacuum. They best know what to do in order to cover up with this. Security seems to be the last hope for children and their parents for schools to fully return to normal.

**https://www.cameroon-tribune.cm/article.html/12136/en.html/keeping-eyes-open 1/1**

# South West: Schools Being Well Protected

By Richard Kometa 20 Sept. 2017

The Administration is sparing no effort to enable safe learning and teaching in schools. Following a coordinating meeting summoned early August by the South West Governor, Bernard Okalia Bilai, boarding schools in particular as well as all schools were assured of State protection against attacks and calls for school boycott by invisible persons. Two weeks into the 2017-2018 academic year, calm and serenity are evident in the various Divisional headquarters of the six administrative zones (Divisions) of the Region. With no major incident reported so far, special surveillance is being mounted around boarding schools of the Catholic, Presbyterian, Baptist, and Lay Private ownership. Day schools, both public and private, are also under scrutiny against any attempts of intimidation, harm and destruction The managers of these schools called out for special protection against arsonists and violent invaders as a condition for them to reopen them. They argued during meetings with public officials that “the security of our children is at stake” As Cameroon Tribune plied the streets of Buea and Limbe visiting Primary and secondary schools the watchful eye of safekeeping officials and private security guards was evidenced at school gates, on strategic points of the towns and even in unsuspected areas. Last Saturday, school uniforms resurfaced in the streets on children going for catch up classes from 8am to 12 noon. In the markets, tailoring workshops, bookshops and stores, school needs like books and uniforms began reappearing. It gives the impression that ghost school mongers have nowhere to hide should they try to attack school needs again in the South West Region. The next worry has so far been how to manage the space between the school and the home and the men in uniform have held planning meetings to iron out that aspect. “In security matters we do not say everything in public,” Governor Okalia Bilai reiterated during his coordination meeting last August. In Molyko, for example, some security officers have been seen helping to cross children from one side of the road to the other amid heavy traffic. The generalized fear is sinking in favour of a growing courage to take children to school. More and more schools are seeing their population grow school by the day. In many cases, apart from nursery schools, parents are seen taking their children personally to school campuses. A pool of cars are often packed by some parents in front of the BGS Molyko, GBHS Muea, GHS Bokwaongo and GHs Bolifamba. It is a sign that parents are collaborating with officials to secure their children and take fear out of the sails of the communities for children to attend school. Reaction Bernard Okalia Bilai: “We have Deployed Special Measures To Protect Boarding Schools” Governor of South West Region. “We are calling on the general public to collaborate and denounce any persons threatening the security of our children. The children must enjoy their right to go to school despite threats from invisible persons. I have instructed all Senior Divisional Officers to ensure the safety of pupils, students, teachers and the schools against perpetrators of violence. I cannot expose all methods we are using because the perpetrators of violence may take advantage but we are very alert. We have deployed special measures to protect boarding schools”.

[**https://www.cameroon-tribune.cm/article.html/12139/en.html/south-west-schools-being-well-protected 1/2**](https://www.cameroon-tribune.cm/article.html/12139/en.html/south-west-schools-being-well-protected%201/2)

# Transport Sector: workers call off today's strike

By 25 Sept. 2017

They have urged stakeholders across the country to go about business normally, contrary to previous boycott calls. Anationwide industrial strike action which was planned for Monday September 25, 2017, to paralyse the road transport sector has been cancelled. The strike was called off, Saturday September 23, 2017, after road transport workers grouped under the National Syndicates of Road Transport of Cameroon had fruitful discussions with several government officials. They had held separate talks with the Minister of Transport, the Minister of Trade and the Minister of Labour and Social Security. According to a press release sent to our newsroom, the trade unionists said they called off the strike following concrete solutions taken by government to resolve their problems. They noted that after concertations, government promised measures to address their worries. These include curbing clandestine transportation, ameliorating the working conditions of drivers and bringing order to the activities of professional drivers. Concerning the reduction of fuel prices, the drivers lauded the efforts of the Minister of Trade who took a personal engagement to champion advocacy for the cause. “We shall maintain dialogue with government in many other meetings to come. We count on the civility and patriotism of all during this delicate period,” the transporters noted. In one of the crisis meetings, the Minister of Trade, Luc Magloire Mbarga Atangana commended the trade unionists for the love shown for country by entertaining dialogue. He reminded them of the moral responsibility to be united in the face of economic and security shocks tormenting Cameroon. “We decided to renew our spirit of partnership and dialogue. We are very positive,” Luc Magloire said. It should be recalled that in a letter dated August 28, 2017, eight trade unions grouped under the banner of National Syndicates of Road Transport of Cameroon petitioned the Prime Minister, Head of Government with a series of grievances. They threatened to paralyse the entire road transport system in the country should their demands not be met before September 25. The trade unionists had expressed worries over the non-application of the Collective Convention, the delayance in the issuance of professional badges, the reoccurrence of frequent deadly road accidents and the wish to have the prices of fuel reduced. They noted that they wanted their sector to be cleaned and left exclusively for professional drivers.

[**https://www.cameroon-tribune.cm/article.html/12316/en.html/transport-sector-workers-call-off-today-s-strike 1/1**](https://www.cameroon-tribune.cm/article.html/12316/en.html/transport-sector-workers-call-off-today-s-strike%201/1)

# Incendie au Sacred Heart College: un crime inqualifiable

By Shey Peter MABU 21 Sept. 2017

Incendie au Sacred Heart College: un crime inqualifiable COMMENTAIRE Ceux qui connaissent le Sacred Heart College, un établissement scolaire de renom créé par l’Eglise catholique à Mankon, un quartier de Bamenda, chef-lieu de la région du Nord-Ouest, ne tarissent pas d’éloges à l’endroit de cette véritable institution dont la réputation a traversé les frontières nationales. Et pour cause ! Les observateurs sont unanimes pour reconnaître qu’il s’agit d’un monument qui a apporté une contribution incommensurable à la formation de l’élite intellectuelle du Cameroun. Ses anciens élèves, aujourd’hui hauts responsables politiques et administratifs, capitaines d’industries, affirment qu’ils ont gardé de leur passage dans ce collège un souvenir mémorable. Alors que l’icône poursuit sa belle aventure, des individus ont eu la malheureuse idée, le 18 septembre 2017, d’aller nuitamment incendier une partie des locaux de ce haut lieu du savoir. C’est un crime inqualifiable. En attendant les résultats de l’enquête ouverte, les présumés pyromanes seraient, une fois de plus, les partisans du boycott de la rentrée scolaire qui a pourtant eu lieu également dans le Nord-Ouest depuis le 4 septembre 2017. Avec, d’ailleurs, un taux de fréquentation en hausse dans ce collège où, une semaine après la reprise des cours, 300 apprenants ont été enregistrés, contre 138 le jour de la rentrée. Une dynamique de reprise encourageante qui passe cependant mal aux yeux des ennemis de la paix, apparemment déterminés à tout mettre en œuvre pour que la tension ne retombe pas dans cette partie du pays tant que leurs revendications politiques, parfois contraires aux prescriptions de la Constitution, ne sont pas prises en compte Dans cette crise qui s’apparente à un dangereux bras de fer, en dépit des mesures d’apaisement récemment prises par le chef de l’Etat et saluées par la communauté internationale, l’actualité récente montre clairement que les extrémistes qui veulent sacrifier la jeunesse sur l’autel de leurs intérêts égoïstes, en créant un climat de terreur, sont progressivement mis en minorité par la majorité des Camerounais épris de paix. Par conséquent, ils gagneraient à rentrer rapidement dans les rangs, d’autant plus que les actes de vandalisme qu’ils multiplient sont condamnables au regard de la loi. En dernière analyse, les auteurs de cet autre crime contre l’école et la jeunesse camerounaise jouent contre les intérêts même des élèves et des parents qu’ils prétendent défendre car on ne peut, sous aucun prétexte, sacrifier l’avenir de nos enfants. Heureusement que les pensionnaires du Sacred Heart College et leurs parents ne sont plus dupes. Malgré la destruction d’une partie de leur établissement, ils ont, à l’unisson, renouvelé devant les autorités venues les réconforter, leur ferme engagement à poursuivre les cours. Un sérieux pied-de-nez aux fauteurs de trouble.

[**https://www.cameroon-tribune.cm/article.html/12224/en.html/incendie-au-sacred-heart-college-un-crime 1/1**](https://www.cameroon-tribune.cm/article.html/12224/en.html/incendie-au-sacred-heart-college-un-crime%201/1)

# South West: Mobilization For School Resumption

By Richard Kometa 07 Août 2017

Governor Bernard Okalia promised special security measures for dormitory schools. Authorities of the South West Region are on their heels organizing holiday classes and drumming school return come next month. Senior Divisional Officers, Mayors, Heads of the Forces of Law and Order, Education Delegates, Education Secretaries and School Principals of the South West Region are, each in their spheres, combing their areas to animate school re-opening come September 4. They met last 2 August in Buea, Regional headquarters, convened by the Regional Governor, Bernard Okalia Bilai, to weave strategies for schools resumption on 4 September, 2017. It was resolved at the important meeting held in the Governor’s conference room in Buea that all living forces in the Region should put hands on deck so that pupils and students of the area who lost the last two terms of the 2016-17 school year could get back to classrooms next 4 September. The meeting sprang a lot of hope for parents and children when representatives of the Catholic (Eta Franklin Orock), Presbyterian (Njie Kale Samuel) and Baptist (Rev. Timothy Liombe) all took the floor to declare their plans and readiness to resume schools come September. As they testified, holiday classes are already going on in many schools around the South West major towns except in Lebialem Division where the ghost found its softest bed. Governor Okalia Bilai assured the various Principals of boarding schools that special security measures shall be beefed up around their campuses for effective schooling this time. The two-hour meeting equally dwelled on technical reports by the Regional Delegates for Secondary and Basic Education showing that not up to 30 percent of the syllabuses was covered last year. To cushion the effects, catch-up holiday classes are being organised intensively in the various schools to enable all pupils and students to move to the next classes come September. "There will be no repeating of the class", the school bosses said with the representative of Basic Education announcing that every teacher would take their pupils to the next class since they best know where they ended their syllabus last year. The Educationists advised parents to be ready to help their children for much more homework next year, more hours at school and schooling on Saturdays. They also promised that Pedagogic Advisers would be more on the field next school year than in offices. The Governor called on the various Councils to assist school resumption materially and financially in their various territories encourage school attendance. The Mayors, in turn, pleaded that such instructions from hierarchy be be put in writing so they can back their expenditure **during control.**

[**https://www.cameroon-tribune.cm/article.html/10864/en.html/south-west-mobilization-for-school-resumption 1/1**](https://www.cameroon-tribune.cm/article.html/10864/en.html/south-west-mobilization-for-school-resumption%201/1)

# North West : Back To School Crusade Heightens

By Erick Maville, Directeur Général De L’association Santé En Entreprise (SEE) 11 Août 2017

Governor Adolphe Lele Lafrique prescribes best practices for effective resumption of schools at Regional Administrative, security forum. The persistent Anglophone crisis is not helping matters in efforts to ensure the effective resumption of schools for the 2017/2018 academic year in the North West and it is against this backdrop that Governor, Adolphe Lele Lafrique has told education stake holders that posterity will judge them and children will hold them responsible if they fail to act responsibly in times like this. The event was the Regional administrative and security coordination meeting in Mbengwi, Momo Division on August 9th, 2017 where the governor; hailed religious and traditional leaders, elite and all stakeholders working to stabilize things for normalcy to give education and development a chance in the region. The forum which emerges as the most important deliberatory outfit for the advancement of the region acknowledged that President Biya has extended a hand of fellowship with some responses to concerns raised by protesting Anglophone teacher trade unions and Common Law Lawyers. Governor Adolphe Lele Lafrique showcased special competitive examinations for candidates of English expression into the Common Law department of ENAM, the imminent reconstruction of the Babadjou- Bamenda road, special allocations to rehabilitate difficult spots of the Ring road etc. In effect, the challenges are enormous and the governor inspired stakeholders to shine and be good in the mirror of nation building in times like this. It was also a moment to recognize and show gratitude for the promotion of some sons of the region with recent Presidential Decrees that appointed Robinson Agha, Brigadier General and Awoh Ndang Denis as Inspector General in the Ministry of Public works. Presentation’s at the event featured communication strategies to counter falsehoods about the region, measures to ensure that transporters do not heed to ghost town calls, combat measures against contraband goods, level of execution of public investment projects, registration on electoral lists etc. In the backdrop of threats by unidentified people, successes recently registered with the organization of the University and Military games in Bamenda and the 2017 National day featured prominently for praise by the governor who urged the population to ignore ghost town calls and dominate fear imposed by people from elsewhere.

[**https://www.cameroon-tribune.cm/article.html/11092/en.html/north-west-back-school 1/1**](https://www.cameroon-tribune.cm/article.html/11092/en.html/north-west-back-school%201/1)

# Bamenda: Suspected Criminal Fire Erases CBC Nkwen Primary School

By Erick Maville, Directeur Général De L’association Santé En Entreprise (SEE) 16 Août 2017

Executive President of the Cameroon Baptist Convention (CBC), Rev. Godwill Ncham encourages prayers, vigilance and thanksgiving because it could have been worse. Mobilization towards the effective resumption of schools for the 2017/2018 academic year in Bamenda was threatened in the night of Saturday 12th August, 21017 when suspected criminal fire erased some four classrooms at CBC primary school, Nkwen, Bamenda. Private security guards in the neighbourhood spotted the fire outburst at about 11.30 pm and it required the mobilization of neighbours and the Fire Fighting Unit to check the fire from consuming more classrooms. Christians of the neighbouring CBC Nkwen Baptist church were shocked by the casualties when they filed out for Sunday church services 24 hours later on August 13,2017. Around to encourage the Christians, many whose children attend the primary school, the Executive President of the CBC, urged the Christians to stay calm, prayerful ,vigilant and thankful to God because it could have been worse in a complex that harbours CBC primary school, the French CBC church, the main CBC church and Baptist Comprehensive College (BCC).Rev. Godwill Ncham told Christians to exercise sangfroid because the church has suffered challenges in the past and there is hope with God in control of the future of the church and the nation. The burning of the classrooms comes a few weeks before the resumption of the 2017/2018 Academic year with threats from unidentified people preaching a boycott of schools in the backdrop of the Anglophone crisis rocking the North West and South West regions. The burning of school infrastructure is suspected to be a strategy by proponents of schools boycott to threaten school authorities to backpedal on stepped up mobilization to ensure that schools effectively resume in September 2017. CBC authorities had since published the timetable for schools resumption in all Cameroon Baptist Convention schools and colleges. [**https://www.cameroon-tribune.cm/article.html/11141/en.html/bamenda-suspected-criminal-fire-erases-cbc-nkwen-primary-school 1/1**](https://www.cameroon-tribune.cm/article.html/11141/en.html/bamenda-suspected-criminal-fire-erases-cbc-nkwen-primary-school%201/1)

# Nord-Ouest et Sud-Ouest: des dons pour les déplacés internes

By DIBA 09 Janv. 2019

Nora Ndem, actrice camerounaise, a remis des produits de première nécessité dimanche à Bonabéri. Des sacs de riz, de pâtes alimentaires, des cartons de lait, de sucre, d’huile, de tomate en conserve, de savon, des paquets de papier et de serviettes hygiéniques, des répulsifs anti-moustiques, etc. Ce sont les produits de première nécessité apportés par Nora Ndem, actrice et mannequin camerounais, aux déplacés internes venus du Nord-Ouest et du Sud-Ouest et basés à Bonabéri Bloc 6, quartier Minkwele-Bonendalè, dans l’arrondissement de Douala IV. C’était lors d’une remise de dons dimanche 6 janvier 2018, dans le cadre de l’initiative « IDP Support ». IDP pour Internally Displaced Persons. Pour Nora Ndem, accompagnée par des amis bénévoles, cette descente est une prise de contact. Il s’agissait de venir voir dans quelles conditions vivent les déplacés internes, s’enquérir de leurs besoins et d’attirer l’attention d’autres âmes charitables, célébrités comme anonymes, particuliers comme organisations, sur le sort de cette population. « Je ne pouvais pas venir les bras ballants. Cette initiative vient du fond de mon cœur. Il y a une crise dans le pays et des gens sont affectés. Et ce sont nos frères et nos sœurs. J’ai donc ressenti la responsabilité en tant qu’être humain et en tant que personne qui a peut-être des proches touchés, de partager avec eux ce que je reçois », a déclaré Miss Cameroon Usa 2014. Et l’objectif de cette première visite qui était d’apporter du sourire et donner de l’espoir pour 2019 aux déplacés a été atteint, selon Charles Leke, premier notable du bloc 6 : « C’est un geste merveilleux de notre sœur. Nous n’avons jamais reçu de dons ici. Nous allons nous assurer que ce soit partagé à chaque famille. Chaque petite chose, même si c’est un morceau de savon par famille, pour que tout le monde bénéficie du geste de cette dame. » Une action caritative bienvenue donc, pour des personnes qui survivent grâce à la solidarité du voisinage, comme l’explique Charles Leke : «Personnellement, j’ai reçu 28 personnes dans ma maison (…) Ils ont réellement besoin d’aide. Ils sont à l’école et ils n’ont pas de fournitures, ils sont dans des maisons où il n’y a pas de matelas. Ils n’ont même pas le simple repas. » Justement, ces besoins font partie de ceux recensés par « IDP Support » : fournitures scolaires pour près de 200 élèves, frais de scolarité, matelas, moustiquaires, répulsifs anti-moustiques, denrées alimentaires. Certains déplacés ont aussi évoqué le manque d’activités génératrices de revenus.

[**https://www.cameroon-tribune.cm/article.html/23496/fr.html/cameroon-tribune 1/2**](https://www.cameroon-tribune.cm/article.html/23496/fr.html/cameroon-tribune%201/2)

# Nord-Ouest et Sud-Ouest: Des bourses scolaires offertes aux élèves déplacés

de By Eric Vincent FOMO 14 Janv. 2019

La cérémonie de remise a été présidée par le ministre des Enseignements secondaires, Pr.Nalova Lyonga samedi 13 janvier à Bafang. Blanche Nicaise Shuri, une élève déplacée de la région du Nord-Ouest n’a pas caché son émotion samedi ,13 janvier 2019, après avoir reçu des mains du ministre des Enseignements secondaires, le Pr.Nalova Lyonga une bourse scolaire de 50 000 F. Cet argent valui permettre de poursuivre ses études, après que sa famille a fui cette région en crise. Comme elle, ils sont au total 100 jeunes des lycées et collèges, dont 30 élèves déplacés des régions du Nord-ouest et du Sud-ouest à avoir reçu des bourses scolaires d’une valeur de 50 000 F samedi dernier à Bafang, département du Haut-Nkam. Ce don est l’œuvre d’un fils de ce département, Brice Tchoualeu, à travers la Fondation HYE (Helping Youth Through Education) qu’il dirige. Ce jeune qui évolue dans la diaspora s’est souvenu de son pays, le Cameroun, et c’est ainsi que depuis quatre ans déjà, il y prime l’excellence scolaire. Le Pr. Nalova Lyonga a salué cet acte de générosité et demandé à ces jeunes d’avoir soif du savoir, de rechercher le succès afin d’être demain des donateurs pour leurs jeunes cadets. « Restez bons. Consacrez-vous à vos études, vivez afin que d’autres puissent aussi vivre demain à travers vous. Détournez-vous de la drogue, de l’indiscipline, de la paresse et du matérialisme », a martelé le Minesec. Pr. Nalova Lyonga a également félicité les populations du Haut-Nkam qui ont reçu les déplacés comme des frères et sœurs. Avant elle, André Siaka, parrain de cet évènement, a rappelé que la main tendue de ceux qui ont, à ceux qui n’ont pas est en réalité, l’essence même de l’humanité. « Celui qui donne le fait par solidarité. Cela s’impose comme un devoir d’humanité qui justifie notre passage ici-bas. En donnant ces bourses, Brice arrose des jeunes plantes qui demain porteront des fruits dont notre pays sera fier », a indiqué le parrain. Emu par ces propos, Brice Tchoualeu, fervent fidèle de l’Eglise adventiste du septième jour, a laissé couler des larmes de joie. Dans sa prise parole, il a rappelé aux bénéficiaires des bourses scolaires qu’ils sont des élus choisis parmi une multitude et qu’ils doivent être des ambassadeurs de Christ.

[**https://www.cameroon-tribune.cm/article.html/23587/en.html/nord-ouest-sud-ouest-bourses-scolaires-offertes-aux-eleves-deplaces 1/2**](https://www.cameroon-tribune.cm/article.html/23587/en.html/nord-ouest-sud-ouest-bourses-scolaires-offertes-aux-eleves-deplaces%201/2)

# Upheavals In NW/SW - Red Cross Shows Concern | NW/SW Crisis-Cameroon By LIENGU ETAKA ESONG 20 Juin 2019

In a press conference organized in Douala on June 14, the ICRC authorities expressed the need to open their offices in the two affected regions. With the outbreak of violence in the two English speaking regions of Cameroon the International Committee of Red cross-ICRC has been present on the field to ensure that the humanitarian situation gets better. The ICRC delegation has been to both regions on several occasions to get first hand information on the situation so as to know how to ameliorate their intervention. After their visits to both regions, authorities of ICRC have decided to open regional offices in Bamenda and Buea so as to better intervene and help those affected. This was the principal message delivered in a press conference organized in Douala on the 14 of June 2019, during which the Assistant Regional Director for ICRC in Africa, Patrick Youssef, and the Head of Operation at Regional Delegation of ICRC for Central Africa Jérôme Fontana, both threw light on their activities in Cameroon. They said the movement has been to prison in the North West and South West regions and have visited prisons out of the regions to support those who were detained as a result of the ongoing crisis. For Mr Patrick Youssef, after their visits to both regions they realized that the humanitarian situation is degrading and the living conditions of the displaced persons is deteriorating, consequently, they have decided to set up regional offices in both regions. He said the office in Bamenda will go operational in a few weeks time while that of Buea will follow. As to why the North West region first, he said the situation there is worst as compared to that of the South West. He said they are very determined to come in and act fast so as to reduce the rate of suffering of the people living in both regions. He added that the ICRC is pushing forward to ensure that dialogue takes place. Meanwhile, Jérôme Fontana sounded off that all actors for dialogue should respect human rights. He also disclosed that they have trained gendarmerie and police officers on how to treat people detained as a result of the crisis as well as those who were detained during the post elections period. They also disclosed that the ICRC has also intervened in the Far North where Boko Haram has been causing havoc as well as in the East region where Central African refugees are being hosted.

[**https://www.cameroon-tribune.cm/article.html/26361/en.html/upheavals-in-nw-sw-red-cross-shows-concern**](https://www.cameroon-tribune.cm/article.html/26361/en.html/upheavals-in-nw-sw-red-cross-shows-concern)

# Situation dans le Nord-Ouest et le Sud-Ouest: le rappel à l’ordre du CNC

Le président By 17 Mai 2018 07:03 0 Likes

Le communiqué de presse du président du Conseil national de la Communication parvenu à notre Rédaction. «Le président du Conseil national de la Communication (CNC) constate avec regret que, dans leurs productions médiatiques, notamment sur la crise en cours dans les régions du Nord-Ouest et du Sud-Ouest, certains professionnels des médias, en violation des règles éthiques et déontologiques de la communication sociale, ont choisi, souvent par la publication d’informations sans fondement et sans vérification, d’inciter l’opinion à la violence et à la haine à travers les contenus médiatiques. Des telles pratiques non professionnelles exacerbent les tensions déjà existantes sur nos chères valeurs nationales d’unité, d’intégration et de paix sociale en mettant ainsi en péril notre poursuite collective des nobles idéaux du pluralisme, de démocratie, du multiculturalisme et du vivre-ensemble. A l’aune de la célébration de la 46e fête nationale, le 20 mai 2018, sous le thème « Citoyens camerounais, restons unis dns la divesité et préservons la paix sociale, pour un Cameroun stable, indivisible et prospère », le président du Conseil national de la Communication (CNC) exhorte à nouveau les organes de presse et les journalistes à faire preuve de plus de responsabilité dans l’exercice de leur profession et leur demande de conformer leurs productions médiatiques à la réglementation en vigueur en matière de communication sociale».

[**https://www.cameroon-tribune.cm/article.html/18981/en.html/situation-dans-le-nord-ouest-le-sud-ouest-le-rappel-lordre-du-cnc 1/1**](https://www.cameroon-tribune.cm/article.html/18981/en.html/situation-dans-le-nord-ouest-le-sud-ouest-le-rappel-lordre-du-cnc%201/1)

# Crisis Management: National Communication Council Calls For Order By 17 Mai 2018

«The President of the National Communication Council observes with regret that in their reporting, especially of the ongoing crisis in the North West and South West Regions, certain media organs and journalists have, with brazen and recurrent disregard for professional ethics, been failing to sift incitement to violence and hate from their content, often crafting and spreading fake news without full verification. Such unprofessional practices only serve to deepen the already existing strains on our cherished national values of unity, integration and social peace, as well as endanger our collective pursuit of the lofty ideals of pluralism, democracy, multiculturalism and togetherness. As the nation celebrates the 46th National Day on May 20, 2018 under the theme, “Cameroonian citizens, let us remain united in diversity and preserve social peace, for a stable, indivisible and prosperous Cameroon,” the President of the National Communication Council seizes the opportunity to once again call on media organs and journalists to exhibit social responsibility by ensuring that their reporting is in compliance with the professional code of ethics and other regulations in force in the area of mass communication». The President

[**https://www.cameroon-tribune.cm/article.html/18980/en.html/crisis-management-national-communication-council-calls-for-order 1/1**](https://www.cameroon-tribune.cm/article.html/18980/en.html/crisis-management-national-communication-council-calls-for-order%201/1)

# South West: Heightened Security Sees Exam

Richard Kometa 16 Mai 2018

Parents and Forces of Law and Order were determined to ward off any threats. Some 11.846 candidates who registered for the 2018 Common Entrance Examination in the South West Region have sat for the exam in 98 centres across the Region. Equally, the “Entrée en Sixième”, Francophone equivalent of the Anglophone Common Entrance was also being written in the region. For security reasons, the number of centres was technically down-scaled from over two hundred as was in the previous years. The Regional Delegate for Basic Education, Mrs Motaze Dorothy Atabong, set out to Limbe where she supervised the writing of this year’s Common Entrance. In Buea, seat of the Regional Administration, the Divisional Officer, Kouam Wokam Paul, made impromptu visits to the existing four exam centres in the vicinity to ascertain the security of the pupilcandidates. On the field, the D O noticed with pleasure that parents of the various pupils had thronged the outskirts of the various schools where the exam was being written, waiting to take their children home after the exam. By 1:00 p.m, the DO rounded his outing and was gladdened that the exam was moving according to plan. The DO opened his tour of the Buea exam centres with Government School Buea Town which accommodated two centres. The centre registered a total of some 1.193 candidates. The head-teachers of both Groups One and Two confirmed that all was moving without hitch. At the “Ecole Francophone” in the Military camp, the DO observed with keen interest that the blind candidates were taking the exam smoothly. The DO moved to the Government School Bonduma where he visited two centres and took time, like during other stop-overs, to speak to the crowd of parents who accompanied their children to the exam centre. He urged them to adopt the same attitude henceforth by jointly protecting their offspring in collaboration with the Forces of Law and Order. At the Bilingual Grammar School Molyko where the Entrée en Sixième was being written, Mr. Wokam Paul congratulated the principal, Hannah Mbua, for her usual organisational prowess. By At the end of his supervisory tour, the DO expressed delight that the exam was being conducted properly. He also rejoiced that parents would henceforth be closer to their children to say no to insurgents. Meanwhile news from other Divisions of the South West Region confirmed that the exam was written except in Lebialem where insecurity pushed the education authorities to accommodate a centre in neighbouring Dschang, headquarters of Menoua Division in the West Region .

[**https://www.cameroon-tribune.cm/article.html/18949/en.html/south-west-heightened-security-sees-exam-through 1/2**](https://www.cameroon-tribune.cm/article.html/18949/en.html/south-west-heightened-security-sees-exam-through%201/2)

# North West: Basic Education Minister encourages candidates

By Erick Maville, Directeur Général De L’association Santé En Entreprise (SEE) 14 Juin 2018

Parents massively present at examination centers to ensure safety of candidates. “Take courage, good luck” was the message, the visiting Minister of Basic Education , Youssouf Hadidja Alim took to candidates involved in the 2018 end of course FSLC and CEP in the North West region on June, 12, 2018. The examinations are on course with some 12.572 candidates for the First School Leaving Certificate and some 298 for the Certificate d’ Etude Premaire (CEP). In effect, the visiting Minister went monitoring and encouraging candidates in some seven Centers in Ndop, Ngoketungia Division and Bamenda, Mezam Division enlarged to accommodate candidates from less safe areas. It is against this backdrop that parents massively filed out to accompany and ensure the safety of their children at respective Centers. In Ndop, Minister Youssouf Hadidja Alim monitored the conduct of the examinations at P.S Bamessing where 32 pupils registered, EPF Ndop with 19 writing Dictee and production d’ Ecrits at press time on day one. At St. Peter and Paul’s Catholic School Bamunka, a total 252 pupils were on duty with one from the very unsafe Belo sub Division while GPS Group II Bamunka had 228 writing Mathematics I and Mathematics II. Away from Ngoketungia Division, the exercise took the Minister and North West governor, Adolphe Lele Lafrique to the GPs Bamenda I accommodation Center that featured other pupils from CS Bayelle, PS Ntaghem and St John Catholic Primary school and some 15 from Belo for a total 990. At the EPF Army Camp up Station, 61 pupils were available for the CEP examination while GPS, Old Town which accommodates CBC School Nkwen and 15 other pupils from Belo featured, 257 effectively participating. Curtains dropped with North West governor, Adolphe Lele Lafrique saluting discipline that reigns. He had warm words for parents who accompanied their children to enhance security stepped up to secure the safety of actors. Day two of the examinations today June 13th will feature General papers French etc.

[https://www.cameroon-tribune.cm/article.html/19860/en.html/north-west-basic-education-minister-encourages-candidates 1/1](https://www.cameroon-tribune.cm/article.html/19860/en.html/north-west-basic-education-minister-encourages-candidates%201/1)

# South West: Moslems Pray For Dev’t In Cameroon

By 18 Juin 2018

This was at the esplanade of the Buea Town Green Stadium as they mark the celebrations of the Feast of Ramadan. The Chief Imam of the Buea Central Mosque, His Eminence, Alhadji Mohammed Aboubakar has saluted Moslems faithful who throughout the fasting period have respected all the prescription to the fasting ritual by Allah. Among the rites for healthy people are the act of compulsory 30 days fasting and sharing with the poor. The message was delivered from the pulpit as the Moslems commemorate the Feast of Ramadan at the Esplanade of the Buea Town Green Stadium. Quoting from the Noble Quran 65:2-3, the cleric said that whoever fears Allah and keeps his duty to him, he (Allah) will make a way for the person to get out of every difficulty. He pointed out that the problems faced today in the society are as a result of accumulated deeds, with man abandoning the way to rectitude. “The only way out of suffering is to return to Allah,” he preached. The Moslem Community made special supplications on sustained peace, security, development and unity in Cameroon. The prayer was intense for Allah to intervene and provide urgent solutions for the crisis disturbing the North West and South West Regions. The elections set for this year, the refugee crisis in the East Region and Boko Haram menace in the Northern Regions were part of the prayers. His Eminence, Alhadji Mohammed Aboubakar appealed to the authority to seek lasting solutions to the crisis that has displaced many from their ancestral lands in the Anglophone Community. For the first time, all the Moslems in Buea Subdivision gathered on one scene and said their Feast of Ramadan prayers at the walkway of the Buea Town Green Stadium. The ceremony was guested among others by the South West Governor, Bernard Okalia Bilai.

**https://www.cameroon-tribune.cm/article.html/19920/en.html/south-west-moslems-pray-for-devt-in-cameroon 1/1**

# School Resumption In NW: Officials Encourage Stakeholders

. By Choves LOH 04 Sept. 2018

Amidst the socio-political unrest hitting the region, the Minister of Basic Education, Youssouf Adidja Alim and the Secretary General in the Ministry of Secondary Education, Bisse Bea launched the 2018/2019 academic year in Bamenda. “Be courageous, exercise sangfroid and embrace innovations in curricula in efforts to promote quality education and values that inspire hope in society”. This was the take-home message delivered by the Minister of Basic Education, Youssouf Adidja Alim as she launched the 2018/2019 academic year in Bamenda, Monday September 3. The Minister made a special appeal to stakeholders to give children a chance in the future by letting them study now. It emerged from the event ground at Ecole Puplique Les Champions in Up Station Bamenda, that the government is making huge sacrifices to promote education, with the construction of classrooms, acquisition of didactic materials, purchase of benches and recruitment of teachers. In this light, Minister Youssouf urged parents and children in the North West not to miss out on the goodness of education which offers multiple opportunities, especially in entrepreneurship, leadership, amongst others. She announced imminent budgetary allocations for the refurbishment of some dilapidating school infrastructure. The Minister acknowledged that the North West is the destination for excellence in education and regretted that the socio-political crisis rocking the region has not helped matters. About half of the population of pupils have been out of classrooms. The basic education boss called for a minute silence for civilians and security officers who have lost their lives during the period of the crisis. Besides the Minister of Basic Education, the Secretary General in the Ministry of Secondary Education, Bisse Bea also used yesterday’s launching exercise to size up school resumption in some colleges in Bamenda. He was at GBHS Bamendakwe where over 300 students were present for classes13:18 0 The day also took him to GBHS Down Town which featured 129 students and later GBHS Ntamulung, GBHS Bayelle, amongst others. The Secretary General took out time to explain the concept of “clean schools” as a priority this academic year. He said it is all about hygiene and sanitation, serenity, zero tolerance for drug abuse in the school milieu, best practices in living together, amongst others.

[**https://www.cameroon-tribune.cm/article.html/20313/en.html/school-resumption-in-nw-officials-encourage-stakeholders 1/2**](https://www.cameroon-tribune.cm/article.html/20313/en.html/school-resumption-in-nw-officials-encourage-stakeholders%201/2)

# Au Tribunal: Charges Dropped Against Mimi Mefo

By Vubem Fred 13 Nov. 2018

Initially scheduled for 10 am, it was finally at about 3pm that Mimi Mefo was heard at the military court in Douala. Despite the massive mobilization of lawyers and journalists bracing up for what was thought to be the beginning of a long legal battle, the judge took everyone by surprise when he announced the dropping of all the charges against the journalist of Equinoxe television. As early as 9.30 a.m. people started streaming into the premises of the military court but were surprise not to find Mefo’s name on the roll for cases to be heard for the day. This made some people to think the matter had been dropped and this feeling was heightened by the fact that Mimi Mefo herself could not be seen around. However at about 10.30 am, the court registrar came and added Mimi’s name on the roll which was the 23rd and last name on the roll. When the court session started, the court room could not contain the crowd that turned up and some people were bound to stay outside. The court started with the other cases on the roll and when it came to her turn, the public was surprised the charges had been declassified to mere threat to public order. That is, propagation of false information and disrespect for constituted corps. Though there were only nine names of layers on the roll, about thirty lawyers turned up to defend her with some coming from as far as Buea and Bamenda. It would be recalled that Mimi Mefo was jailed for three days before being released last Saturday but it was not clear whether the case against her was going to continue or be dropped. That confirmation was thus given yesterday with the dropping of the charges against her to the delight of her friend colleagues and well-wishers.

[https://www.cameroon-tribune.cm/article.html/22188/en.html/au-tribunal-charges-dropped-against-mimi-mefo 1/1](https://www.cameroon-tribune.cm/article.html/22188/en.html/au-tribunal-charges-dropped-against-mimi-mefo%201/1)

# North West: Disciplinary Board Suspends Workers’ Salaries

. By Choves LOH 19 Nov. 2018

Salaries 19 workers faced the Regional Disciplinary Board recently to defend selves against accusations of undue absences and abandonment of duty posts. An in-camera session of the Regional Disciplinary Board dropped curtains in Bamenda on November 15, 2018 with the suspension of salaries of some 15 civil servants and state workers. The session equally featured warnings for some four workers in the lump sum of a total 19 that were summoned to defend themselves in cases of undue absences and abandonment of duty posts. It emerged from the Board that the files concerned with suspended salaries have been forwarded to the Permanent Disciplinary Council in Yaounde. The Permanent Secretary at the Governor’s office, Lanyuy Harry presided at the Jury which came face to face with four of those summoned for hearing. The Rapporteur of the Regional Disciplinary Board, who doubles as the Regional Delegate of Public Service and Administrative Reforms, Ekane Ivo told Cameroon Tribune (CT) that most others received queries and summons but refused to appear before the Board. Enrolled for the hearing were ten staff of the Ministry of Secondary Education, two from the Ministry of Finance and one each from Public Health, Arts and Culture, Livestock, Fisheries and Animal Industries, Sports and Physical Education, Labour and Social Security, Posts and Telecommunications and the Ministry of Environment, Nature Protection and Sustainable Development. It equally emerged from the Regional Delegation of Public Service and Administrative Reforms that abandonment of duty posts and undue absences are sanctioned by the general rules applicable to Civil Servants and state workers on the strength of Decree No. 94/199 of 7th October 1994, modified by Decree No. 2000/287 of 12th October 2000. The process begins with the issuance of a query by the immediate hierarchy of the accused. When the response is unsatisfactory, the file is forwarded to the Governor who is the chairperson of the Regional Disciplinary BoardAnother query is prepared to confront the initial one by the hierarchy of the accused before summons for preliminary hearing whereby the accused tells his own side of the story at the level of the Rapporteur for a synopsis report ahead of the disciplinary session of the Board. Ekane Ivo stressed that the Regional board is empowered to deliver written sanctions, reprimand and can defer increment for a period of one year or reduce one or two incremental positions of a guilty accused covered by categories one and two sanctions while category 3 and 4 sanctions are the reserve of the Permanent Disciplinary Council. Such sanctions include reduction of class, grade, temporal interdiction from duty, dismissal.

[https://www.cameroon-tribune.cm/article.html/22361/en.html/north-west-disciplinary-board-suspends-workers-salaries 1/2](https://www.cameroon-tribune.cm/article.html/22361/en.html/north-west-disciplinary-board-suspends-workers-salaries%201/2)

# Fake News, l'alerte rouge By DIBA 28 Déc. 2018

Le phénomène a peut-être connu son apogée au Cameroun cette année, entre la crise au Nord-Ouest et au Sud-Ouest la présidentielle 2018. Crise dans les régions du Nord-Ouest et du Sud-Ouest et élection présidentielle 2018. C'est sûrement les deux théâtres d'opération qui ont subi le plus de fake news lors de cette année écoulée. Entre vidéos, photos et éléments sonores détournés, documents prétendument officiels annonçant telle ou telle autre mesure, donnant des « instructions », révélations fracassantes, faux comptes créés sur les réseaux sociaux pour partager de fausses informations ou encore, et surtout, distiller la haine. Avec une cote d'alerte tellement élevée, surtout pour la crise au Nord-Ouest et au Sud-Ouest NoSo, que les émissaires de Facebook n'ont pas hésité à faire le déplacement pour le Cameroun en août 2018, entre ateliers en direction des médias et de la société civile, rencontres avec les autorités. Et lors de l'atelier sur « les fake news et la désinformation » de Douala, Aïda Ndiaye, responsable de la politique du réseau social pour l'Afrique francophone, avait expliqué : « La liberté d'information est au cœur de notre plateforme. Les gens ont eu le pouvoir de communiquer, de porter leur propre voix. Mais maintenant, il y a des dérives…On s'est rendus compte qu'il y a une forte propagation de fausses nouvelles ces derniers temps…Au Cameroun, notre plateforme est utilisée pour inciter à la haine. C'est pour cela que nous sommes [ici]. » Il était donc question de rencontrer la société civile afin de savoir quelles sont les réalités au Cameroun et de rapprocher aussi des pouvoirs publics dans le même sens. Une rencontre à laquelle avait également pris part une avocate, Me Balbine Manga, qui a exposé sur les procédures de signalement des fake news. On peut ainsi s'appuyer sur la loi n°2010/012 du 21 décembre 2010 relative à la cybersécurité et la cybercriminalité. Mais dans un contexte où l'application n'est pas encore vraiment effective, les créateurs de fake news continuent à s'en donner à cœur joie dans leurs « laboratoires », comme les appellent les internautes. Avec à leur portée des armes de destruction massive, Facebook et surtout le service de messagerie WhatsApp où les images, textes et vidéos se partagent à l'envi, plus rapidement que la vitesse du débit internet. Les exemples pullulent : qui pour annoncer la hausse des salaires, qui pour partager le visage d'un bonhomme qui serait originaire de telle partie du pays et qui aurait fait des promesses funestes à des ressortissants d'un autre coin du triangle national, etc. Une situation qui fait revenir à l'esprit cette mise en garde aux allures prophétiques du Nigerian Abdulwaheed Odusile, président de la Fédération africaine des journalistes (Faj). En 2017, lors de l'université du Syndicat national des journalistes du Cameroun (Snjc), organisé à Douala, il avertissait : « Les médias sociaux ne sont pas un danger pour le journalisme. Ils sont un danger pour la société. Un individu s'enferme dans sa chambre, il imagine des choses, il rédige un papier qu'il balance sur Facebook et les gens croient à ce qu'il a écrit. » Aux journalistes donc, les vrais, de prendre leurs responsabilités et de donner la bonne information au public.

[https://www.cameroon-tribune.cm/article.html/23278/en.html/fake-news-l-alerte-rouge 1/2](https://www.cameroon-tribune.cm/article.html/23278/en.html/fake-news-l-alerte-rouge%201/2)

# Lake Nyos: Gov’t Steps Up Security Measures

By YAFE 30 Janv. 2018

The steering committee of the National Programme of the Lake Nyos Security and Rehabilitation project met last Friday in Yaounde. Since the Lake Nyos disaster of August 21, 1986, that claimed huge human and animal lives and caused material and environmental damages, the government, with assistance from development partners, notably the United Nations Development Programme and the European Union have not relented efforts on large-scale activities aimed at rehabilitating the affected areas. In order to properly address and pre-empt a reoccurrence of the disaster, last Friday, January 26, 2018, the Minister Delegate at the Ministry of Territorial Administration and Decentralisation (MINATD) in charge of Local and Regional Councils, Jules Doret Ndongo, chaired the first session of the second phase of the steering committee of the National Programme for the Safety and Rehabilitation of Lake Nyos. Underscoring that the activities of the committee over the years have transformed the Lake Nyos situation of great distress to humanitarian actions with outstanding benefits for the concerned population and the environment, Jules Doret Ndongo highlighted some of the efforts carried out by the government and its partners in securing the Lake Nyos zone. He explained that the degassing process of the lake had led to the extraction of about 90 per cent of toxic gas from the lake. Reinforcement works on the natural dyke of the lake has already taken place in a bid to exclude the inherent risk of floods into farm lands. Stakeholders of local institutions have also benefitted from several training sessions on prevention and management of disaster risks linked to gas emissions. Besides the tarring and rehabilitation of the road linking Nyos village to the lake, victims of the disaster are benefitting from continuous supports (school materials, health kits and agricultural equipments). However, such achievements have not been without shortcomings particularly collaboration deficiencies or even the unavailability of some actors involved in the implementation process of the programme. Hence, the meeting was an occasion for the government and its partners to equally address the late and sometimes cumbersome mobilisation of expected resources, to execute the project. Stakeholders used the meeting to diligently discuss on how they can work towards achieving projects set out by the government in the lake Nyos zone. This is to ensure that the population will progressively and definitely go back to their ancestral site.

[https://www.cameroon-tribune.cm/article.html/15992/fr.html/cameroon-tribune 1/2](https://www.cameroon-tribune.cm/article.html/15992/fr.html/cameroon-tribune%201/2)

# South West: Buea Women Vow To Send Their Children To School By 09 Mars 2018

Governor Okalia Bilai administered the oath to the mothers as he presides over activities marking the 33 International Women’s Day celebration at Bongo Square. The recent appointment of Nalova Lyonga, Ph.D, as the Minister of Secondary Education was on March 8, 2018 at Bongo Square in Buea used as a platform to encourage the girl child in particular and children as a whole to get educated. South West Chief Executive Officer, Bernard Okalia Bilai, explained that the Minister could only get to such a position because of the education she had acquired. To see that such candle continue burning, she tasked the over 10 000 women that turnout to celebrate the Women’s in Buea to vow on oath that they will assure their children education. “I solemnly declare to send my children to school despite the challenges. I swear to denounce all parents who are preventing children from going to school,” the women repeated after the Governor with their right hands up. Thunderous applauses and ululation followed when the declarations ended. South West Regional Delegate for Women Empowerment and the Family, Moffah Juditha Lyengu Luma frowned at some discriminatory practices against women. She cited gender based violence, force and early marriage, female genital mutilation, widowhood rites, sexual harassment, rape, incest among others that are still plaguing the womanhood. “Gone are the days when women and the girls were considered only suitable for child bearing, home keeping and had a place in the kitchen. Women are now taking male dominated professions,” she pointed out. She called on men to join the heforshe campaign to completely eradicate discriminatory practices against women. The event that started with a brief church service at Bongo Square Buea had Rev Mrs Tembi of the Presbyterian Church in Cameroon rendered prayers calling for all to be agents of peace in Cameroon. The First Deputy Mayor at the Buea Council, Emmanuel Motomby Mbome said that God knew women are better managers, reasons why he created more of them. Match pass by women of Regional Delegations, Companies, social groups, tribal groups, professional associations, WCPDM among others ushered the transition for festivity.

[https://www.cameroon-tribune.cm/article.html/17207/en.html/south-west-buea-women-vow-send-their-children-school 1/2](https://www.cameroon-tribune.cm/article.html/17207/en.html/south-west-buea-women-vow-send-their-children-school%201/2)

# 43e conférence épiscopale nationale: les évêques pour la paix

By 16 Avril 2018

Au terme des travaux samedi dernier à Yaoundé, ils ont appelé la communauté nationale à se mobiliser pour un Cameroun paisible. Mgr Samuel Kleda, archevêque de Douala, président de la Conférence épiscopale nationale du Cameroun (CENC), a présidé du 8 au 14 avril 2018 à Yaoundé, les travaux de la 43e assemblée plénière des évêques du Cameroun. Assemblée à laquelle ont participé, outre les archevêques et évêques, les secrétaires et les membres des 14 commissions épiscopales fonctionnelles à la (CENC). Les travaux qui se sont achevés samedi dernier à Mvolyé ont porté sur l’évaluation de la vie de l’Eglise catholique au Cameroun à travers les rapports de chaque commission. Les évêques ont donné des orientations en lien avec leurs objectifs spécifiques dans la mission de l’Eglise. Au cours de l’assemblée, les évêques ont également abordé et analysé certaines questions d’intérêt pour l’Eglise et la nation camerounaise. Autre point crucial, l’exhortation par Mgr Ambrosini, chargé d’affaires ad intérim à la nonciature apostolique au Cameroun. En s’inspirant de l’enseignement du Pape François, il est revenu sur la mission de l’Eglise en tant que porteuse du message d’un évangile transformateur de la société camerounaise pour plus de justice et de paix. Mgr Samuel Kleda a à son tour invité les membres de la CENC à un rassemblement dans la joie de la résurrection du Christ, tout en plaçant les travaux sous le signe de la fraternité. Abordant certaines questions qui préoccupent l’Eglise et l’ensemble des Camerounais, il a appelé à une mobilisation des énergies pour une prise en charge efficiente des aspirations des jeunes en butte aux dures réalités de la vie. Pour lui, l’an 2018 consacré aux élections dans notre pays se présente par conséquent comme une année au cours de laquelle tous les Camerounais doivent se mobiliser pour choisir des hommes et femmes à mesure de se mettre au service du peuple. Sur la crise politique qui secoue les régions du Nord-Ouest et du Sud- Ouest, affectant ainsi la vie sociale et en particulier l’éducation, les évêques souhaitent une analyse approfondie des causes de cette crise et lancent un vibrant appel aux garants de la sécurité pour qu’ils assurent les conditions de paix en faveur d’un retour des populations déplacées. Ils demandent encore une fois de plus aux parents de ramener leurs enfants à l’école, gage de leur avenir et exhortent tous les protagonistes de la crise à abandonner toutes sortes de violences. Quant aux fidèles, ils sont invités à prier pour la paix dans notre pays de façon plus intense.

[https://www.cameroon-tribune.cm/article.html/18255/en.html/43e-conference-episcopale-nationale-les-eveques-pour-la-paix 1/2](https://www.cameroon-tribune.cm/article.html/18255/en.html/43e-conference-episcopale-nationale-les-eveques-pour-la-paix%201/2)

# North West: 336 Bilingual Teachers Sign Engagement Contract

By Carine ELEME (Stagiaire 11 Janv. 2018

More than half of those pre selected have already submitted their files for further transmission to Yaounde. As a solution to one of the problems raised by the all anglophone teachers in 2016 the Head of State president Paul Biya ordered for the recruitment of some 1000 bilingual teachers nation wide. After the recruitment process, some 336 candidates were pre-selected from the North West region. At present the candidates have been thronging the regional delegation of Public Service and Administrative Reforms Northwest to signed their draft engagement contract. At the delegations the pre-selected candidates are presenting their relevant documents in conformity with the recruitment. Prior to this exercise, a two man delegation was dispatch from MINFOPRA to supervised the submission and signing exercise. Since Monday January 8 the team has been on their heels as the number of candidates that show up keeps increasing. According to the head of mission to the North West Meredith Ndi Ngam on the 1st day they had about 50 candidates who submitted and signed their contracts, but on day 2 they had about 100 and at about 2:30pm Wednesday the 10 they had received about 100 files. He said they will be in the region till Friday 19 of January 2018 to ensure that all concerned submit and signed. He said the turn out was overwhelming as they had to use some staff at the regional delegation so as to meet up. He opines that they are equally checking to be sure that the candidates documents are genuine and correspond to the field they applied for. He added that after this phase the next phase will be the final signing of their contracts which will be followed by posting to their various place of work. He said some candidates have showed up whose contracts were not available because they were erroneously sent to other regions, but he remained optimistic that the problems will be sorted out as some of them where allowed to sign. He was positive that a good number of the teachers will be sent to the two English speaking regions. He used the opportunity to call on other candidates who submitted in other regions and were pre-selected but could not travel to where they submitted to come to the regional delegation of public service Northwest and submit their files as well as sign their draft engagement contact.

[https://www.cameroon-tribune.cm/article.html/15456/en.html/north-west-336-bilingual-teachers-sign-engagement 1/1](https://www.cameroon-tribune.cm/article.html/15456/en.html/north-west-336-bilingual-teachers-sign-engagement%201/1)

# NW/SW : Massive Back-To-School By Kunyui NGONMENYUI 16 Juil. 2019

They are calling on all stakeholders to respect and uphold the fundamental rights of children to education and protection. The South West and North West Regions Women’s Task Force (SNWOT) has through a press release called for a massive back to school come September for the academic 2019/2020 throughout the North West and South West Regions of Cameroon. In a six key note points contained in the communiqué, they regretted the setbacks to pupils and students in the North West and South West Regions following sociopolitical upheavals that led to ghost schools. One of the points on the press release indicated that three years of no school have been enormous sacrifice and the message cannot be underestimated. Another point indicated that North West and South West Regions will be missing out in the achievement of Sustainable Development Goals (SDGs) 4 on education and related commitments. There was also a cry that children are being exposed to all kinds of malpractices which include drug abuse, sexual exploitation, child marriage, early pregnancy due to no school etc. Omam Esther Njomo, Coordinator of SNWOT who signed the press release on July 11, 2019 told Cameroon Tribune that pupils and students in the North West and South West Regions should know that it is their right to be educated so that they can improve on their human intellectual and other commitments. “The future of every nation belongs to the youth. Education is the key to any sort of empowerment. This is the reason why we want pupils and students to go back to school so that tomorrow, they will not blame us their parents for having neglected their education,” she said. Omam Esther Njomo also called on parents not be scared, for it is their duty and obligation to ensure that children go back to school. Adding that SNWOT knows safety is a prime concern and they are working to see how they can guarantee safety. The press release ended by calling on all stakeholders to assume their responsibi lities accordingly and uplift ban on education, caution their fighters to stop attacking academic institutions as well as teachers, pupils and students. The press release also highlighted the need to ensure the security of pupils and students by ending hostilities and providing an enabling condition for safe schooling in the North West and South West Regions.

[https://www.cameroon-tribune.cm/article.html/26801/fr.html/cameroon-tribune 1/1](https://www.cameroon-tribune.cm/article.html/26801/fr.html/cameroon-tribune%201/1)

# Nord-Ouest/Sud-Ouest : des élites encouragent la reprise des classes

By Rabiyatou MANA 07 Août 2019

Les anciens du Federal Government Secondary School de Mamfe ont lancé un appel samedi dernier à Yaoundé, pour demander aux élèves et aux parents de briser la peur. Le collectif des anciens élèves de la Fédéral Government Secondary School of Mamfe s’est réuni samedi dernier à Yaoundé pour ses 50 ans d'amitié. Derrière cette célébration, s’adosse un contexte. Celui de la crise dans les régions du Nord-Ouest et du SudOuest. En cette veille de rentrée scolaire 2019-2020, les fils et filles de cette partie du pays ont appelé les parents et les élèves à coopérer pour reprendre le chemin de l’école en septembre prochain. «Si nous n’étions pas allés à l’école, alors nous ne serions pas ce que nous sommes aujourd’hui », a expliqué l’honorable Joseph Mbah Ndam, élite. Le collectif ainsi réuni, entend mobiliser des fonds pour accompagner les pouvoirs publics dans la reconstruction des bâtiments administratifs du lycée de Mamfe. Lesquels ont été détruits par les sécessionnistes. Cet accompagnement va également se décliner à travers des appuis aux élèves et étudiants. Notamment avec des fournitures scolaires, des bourses, entre autres. L’éducation étant essentielle pour le développement individuel mais également pour celui d’une société, le souhait de ces hommes et femmes est de revoir leurs enfants et petits-enfants retourner à l’école en toute sérénité. « On comprend qu’il y a un problème sécuritaire sur le terrain. On comprend que les parents ont peur. Mais nous les encourageons à laisser leurs enfants fréquenter. Parce que c’est pour leur intérêt, celui de la communauté et du pays tout entier», a relevé Patrice Nde Ateh, membre du collectif. Toujours dans la même perspective, il sera question pour ce collectif d’effectuer des descentes sur le terrain afin de sensibiliser les populations. En célébrant leur 50 ans, beaucoup n’ont pas oublié leurs débuts. « A l’époque du fédéralisme, il n y avait que deux collèges bilingues au Cameroun. À Moliko et à Yaoundé. Nous étions Censés venir à Yaoundé pour poursuivre nos études secondaires. A notre arrivée, nous sommes renvoyés à Mamfe pour commencer une nouvelle école. Nous sommes ainsi les tous premiers élèves du troisième collège bilingue créé à Mamfe. Nous sommes devenus les tout-premiers élèves à rester en ville. Nous avons eu une expérience de souffrance ensemble, et c’est pour cela que nous restons unis », a témoigné Joseph Mbah Ndam.

[https://www.cameroon-tribune.cm/article.html/27230/en.html/nord-ouest-sud-ouest-elites-encouragent-la-reprise-classes 1/2](https://www.cameroon-tribune.cm/article.html/27230/en.html/nord-ouest-sud-ouest-elites-encouragent-la-reprise-classes%201/2)

# Buea : 2000 Children Receive Needs Provided

By Kunyui NGONMENYUI 02 Sept. 2019

Mayor Ekema Patrick Esunge handed the parcels to the pupils and students on August 30, 2019, at the Buea Council Hall. 2000 Pupils and students drawn from Bonjongo, Muea, Bonavanda and Buea Central Court Areas that made up the Buea Municipality are beginning school today with most of their school needs provided. The Mayor of Buea Council, Ekema Patrick Esunge, handed to each child, on Friday August 30, 2019, a school bag that contained exercise books, pens, pencils, rulers etc. Head Teachers of all Government Nurseries and Primary Schools in Buea Municipalityeach received large consignments of teaching materials that consisted ofpackets of chalks, packets of blue pens, black rulers, reams of papers, paper founders, coloured chalk, rakes, shovels etc. Their First Aid boxes were also reinforced with medications such as paracetamol, metronidazole, gauze, alcohol, betadine and cotton. In handing the didactic material to the beneficiaries Ekema Patrick said that the Buea Council stands for education and will do whatever it takes to see that her citizens are educated. He saluted the renew enthusiasm shown by the pupils and students to return to their classrooms and receive lectures. “In the course of the academic year, we shall be on our knees praying for you to succeed,” he told the beneficiaries. All the pupils and students that took to the rostrum expressed the needto be educated and expressed gratitude to the donor. EsungeNdive Hans, Head Teacher of GDPS Muea, speaking on behalf of his peers, said that State owned Nursery and Primary Schools in Buea have never lack didactic material as the Buea Council is always there to provide. He expressed joy that they are receiving the materials this time early enough before starting school. He requested his colleague teachers to shun fear and return to their offices (classrooms) and teach. His message was greeted with thunderous applause from teachers, pupils and students as if to indicate that they missed the classrooms.

[https://www.cameroon-tribune.cm/article.html/27651/en.html/buea-2000-children-receive 1/1](https://www.cameroon-tribune.cm/article.html/27651/en.html/buea-2000-children-receive%201/1)

# School Not A Bargain By Richard Kometa 02 Sept. 2019

Another school year has started and unfortunately the old demons of confusion are equally present. Pupils and students across the national territory will as from today 2 September 2019 meet their mates afters over three months of holidays during which they had time to commune with their parents, siblings, and friends. Some might have even taken off the time to learn a trade or something else that can be useful to them as they journey along the uncertain road to success. Sadly, this is proving difficult for some especially in the South West and North West Regions because of separatist calls for school boycott. In the past years the issue was most damaging in the Far North due to the Boko Haram activities incursions. Today, the situation in the two Anglophone regions is even more pathetic. While the disruption of schools in both localities by the strike actions of lawyers and teachers which started in 2016 degenerated into a political and eventually armed conflict, the youth have been treacherously caught in the mayhem and their disapproval of the situation has been evident in the massive exodus witnessed among school going children within this back-to-school period. After staying home for three years, most of the youth have realised that their future lies in education and are leaving the troubled zones to seek a safe haven in other parts of the country. Yet, these are those who can make it by looking elsewhere for a solution. What of those from poor homes or those who lack the possibility to go to other towns. Their plight must also be a cause for concern. That explains why the government, the civil society and some political leaders have been unable to stay indifferent again. By actively joining the campaign for schools to open their doors throughout the country, the message is strong enough. Notably that, the future of young Cameroonians wherever they are cannot be sacrificed on the altar of any claim. The education of children is not a matter of choice or a commodity that someone can decide either to buy or not. Even more, the country has the obligation to ensure that the youth who are the future are able to acquire the right education. Even those who brandish the separatist ideology know fully well that the right to education is inalienable in any society. Consequently, Cameroon cannot be any exception. Going through history, some of the best minds known for generations have unequivocally lauded the merit of education. Malcolm X, a well known civil rights activist said at the time that; “Education is the passport to the future, for tomorrow belongs to those who prepare for it today”; while Albert Einstein argues that, “Education is what remains after one has forgotten what one has learned in school.” The examples are uncountable but it is curious to realise that in the 21st Century people should still think that it is possible to gamble with the education of children. No matter the differences that people may have and irrespective of race, creed and gender, the one and only thing that can make it possible for people to stand out as equals from different walks of life remains education. This is because through education, it easy to have an understanding of the world and be able to use the knowledge acquired in a wise manner. With such reasoning, it becomes difficult to explain to anybody that the best way out of any difficulty should be to stop children from going to school. Be it in the Far North with the Boko Haram insurgencies that keep resurfacing, the restive North West and South West Regions where life must be made comfortable for citizens or in the East Region where rebel from the Central African Republic have exerted pressure on the population, the desire for education to be effective throughout the country as from today, has been demonstrated first by the kids themselves and that has to be taken into consideration because it is their right to go to school.

[https://www.cameroon-tribune.cm/article.html/27648/en.html/school-not-bargain 1/2](https://www.cameroon-tribune.cm/article.html/27648/en.html/school-not-bargain%201/2)

# Back-to-school Campaign : Growing Social Media Mobilisation By Emmanuel 02 Sept. 2019

Focus on the messages broadcast through twitter, face book, WhatsApp and other social media networks is on the effective resumption of schools in the North West and South West . Never before in Cameroon’s history has the social media networks served as a mobilisation instrument for the effective resumption of classes, especially in the socio-political and security crisis-stricken North West and South West Regions. The campaign called “OpenSchoolsNow” has intensified as the resumption of classes for the 2019/2020 academic year begins throughout the national territory today, September 2, 2019 for the basic and secondary education levels. Prime Minister, Head of Government, Chief Dr Joseph Dion Ngute is prominent in the campaign with tweet messages addressed to the crisis-affected North West and South West Regions. He in different tweets appealed respectively to the populations of the two regions. The tweet entitled “ North West Region Back to School 2019/2020 School Year”, the Prime Minister cited the Subdivisions that make up the region and appealed in the Pidgin language, “ BOOK E FINE. BOOK NO DI FAIL MAN. MAKE WE SEND PIKIN DEM FOR SCHOOL.” In an identical message addressed to the South West population he also cited Subdivisions that make up the South West. Other personalities such as the Minister of Territorial Administration, Paul Atanga Nji, Minister of Public Health, Manaouda Malachie, Director General of CRTV, Charles Ndongo, players of the National Female Football Team and some artists have also joined in the campaign. A bulk of the messages are appealing to the population. There are messages such as the “ The door for school resumption is open”, “What will become of our future leaders? We say no to high rates of illiteracy generated by Cameroonian secessionists in the North West and South West Regions”, “The highest weapon on earth is education. Allow our kids to return back to school safely in the North West and South West regions of Cameroon.” Other messages are “We cannot mortgage the future for anything”, “What kind of life without knowing how to read and write”, Why are Cameroonian secessionists depriving out children from going to school in the North West and South West Regions”. Some of the messages are addressed to the secessionists who have perturbed education in the two regions for over three years now. The campaigners say, “Cameroonian secessionists are wicked and evil”, “Fake accounts of secessionists are against school resumption in the North West and South West Regions of Cameroon”, Children of Cameroonian secessionists are studying in Douala, Bafoussam and Yaounde… while their parents force others to respect school boycotts in the North West and South West regions”, “Mr Secessionist, back to school in the North West and South West regions of Cameroon is a must and not a debate.” By the end of today, the first day of school resumption for the 2019/2020 school year, it will be possible to examine whether the back-to-school campaign have started yielding fruits in the North West and South West Regions.

[https://www.cameroon-tribune.cm/article.html/27654/en.html/back-to-school-campaign-growing-social-media 1/2](https://www.cameroon-tribune.cm/article.html/27654/en.html/back-to-school-campaign-growing-social-media%201/2)

# Defence Forces : Ready To Protect Students, Teachers By Emmanuel 02 Sept. 2019

The security evaluation meeting at the Ministry of Defence on August 30, 2019 was dedicated to mobilising all defence and security stakeholders to ensure smooth resumption of schools. Defence and security forces have been mobilised to ensure the effective start of the 2019/2020 academic year that begins today, Monday, September 1, 2019 throughout the national territory and especially in the socio-political and security crisis-ridden North West and South West Regions. The Minister Delegate at the Presidency in charge of Defence, Joseph Beti Assomo chaired the security evaluation meeting that took place on the high instructions of the Head of State, Commander-in-Chief of the Armed Forces, President Paul Biya. Besides high military personnel, the meeting that took place in-camera was also attended by the Minister of Territorial Administration who is also the Permanent Secretary of the National Security Council, Delegate General for National Security and the Director General for External Research. Defence Minister in his opening statement rejoiced at the presence of the other government officials because as he stated, “We are all called to serve our country in matters of security, defence, territorial integrity and management of civic liberties.” Minister Beti Assomo situating the context of the start of the academic year, said it was characterised by socio-political and security turmoil in the North West and South West Regions, resurgence of Boko Haram terrorist threats in the Far North Region, organised crime in the Adamawa and eastern border of the East Region. Concerning the North West and South West Regions, he said it was precarious, stating that despite the daily casualties inflicted on terrorist, secessionists and armed gangs, they were not yet disarming. He said they continue to carry out violent actions on civilians, members of the defence and security forces, teachers, students, religious officials as well as the destruction of some infrastructure and equipment. He added that during the 2018/2019 academic year, the secessionists committed several acts of assault against students and teachers that included beatings, kidnappings and killings. With the current state of affairs, Beti Assomo said, “School resumption this year is therefore a special stake for normalcy to return to the two regions.” It is for this reason, he further said, that, “defence and security forces must more than ever before take all measures for an optimal safety of the back-to-school by protecting schools, students and teachers.” The Defence boss said that the situation called for the total mobilisation of government, living forces, administrative and religious authorities and elite of the North West and South West Regions to enable the youths benefit from their right to education and avoid uncertainty. The resolutions, recommendations and report of the security evaluation meeting that also x-rayed the security situation in all the other regions of the country have to be forwarded to the Head of State, Paul Biya.

[https://www.cameroon-tribune.cm/article.html/27658/en.html/defence-forces-ready-protect-students- 1/2](https://www.cameroon-tribune.cm/article.html/27658/en.html/defence-forces-ready-protect-students-%201/2)

# Timid Day One In North West Schools By Choves LOH 03 Sept. 2019

Some 1000 pupils and students were on roll in day one of the 2019/2020 academic year in the North West admits ghost town and threats of schools boycott. Day one of school' resumption for the 2019/2020 academic year had little to show with few pupils, students and administrative staff braving threats to file out for the learning and teaching process in the North West Region. Prolonged ghost towns and lockdowns of the region's towns and villages did not help matters with those thirsty for education scared of threats from proponents of schools boycott following the socio, political and security crisis rocking the region. The Regional Delegate of Basic Education, Wambeng Wilfred Ndong is hopeful about improved enrolment statistics in the weeks ahead. He told Cameroon Tribune (CT) that day one of the academic year featured some 545 pupils in 11 schools in Donga Mantung Division, 58 in G. S Kiyon, Oku, Bui Division, 120 at Islamic primary school Wum, Menchum Division, 50 at Ecole publique Les champion where Bamenda I D.O, Gilbert Guibai went encouraging pupils and 22 at Ecole publique Francophone, both at the Up station neighbourhood of Bamenda . At press time, Boyo, Momo and Ngoketungia Divisions were yet to feature any pupils in schools. The picture in secondary schools featured three Divisions that effectively opened their doors to education. The Regional Delegate of Secondary Education, Ngwang Roland Yuven told CT that GHS Nkambe enrolled some 200 students on day one with virtually all the colleges in Nkambe and Misaje Sub Divisions receiving pupils and students. By 9: 00 a.m., Menchum Division registered some 64 students in GHS Wum and 28 in GTHS Wum while Meza Division did not impress with barely 21 students in schools. Ngwang Roland Yuven believes that the message of effective studies from the courageous students that turned out will encourage and enhance school going in the days ahead. From the look of things, there was virtually no teaching and learning in Boyo, Bui, Ngoketungia and Momo colleges.

[https://www.cameroon-tribune.cm/article.html/27697/en.html/timid-day-one-in-north-west-schools 1/1](https://www.cameroon-tribune.cm/article.html/27697/en.html/timid-day-one-in-north-west-schools%201/1)

# Slow Start In South West By Kunyui NGONMENYUI 03 Sept. 2019

Given that yesterday was the first day in school, Governor Okalia Bilai expressed satisfaction at the attendance and hoped the turnout will increase. Some pupils and students in the South West Region yesterday, Monday September 2, 2019, joined their peers nationwide to begin classes for the academic year 2019/2020. At Government Nursery and Primary School Man’O War Bay in Limbe III Municipality, songs of learning welcomed the South West Governor, Bernard Okalia Bilai and education family accompanying him. The Governor also supervised teaching and learning at Government Technical College Bimbia, SONARA Nursery and Primary School: and College, Presbyterian Girls Secondary School Limbe, Regina Pacis College Muntenge, Baptist High School Buea and Presbyterian Comprehensive Secondary School Buea. At each of the schools visited, Bernard Okalia Bilai congratulated the learners for defying odds to begin school on the first day. “I can see young Cameroonians who have decided to build their future. And when you build your future, you are building that of your families, communities and that of your country,” he advised. The Governor encouraged the learners to inform their friends and relations that classes have started and they should all be in school the next day. He assured them of security disposition as they study. “If you are not educated then you cannot fully participate in the building of your community. I hope that at the end of the year, you should all be successful candidates and progress in your academics,” he said while wishing them a successful academic year. In Bilingual Grammar School Molyko, Government Technical High School Molyko and Government Technical College Bimbia, a consignment of didactic materials was handed to the principals by the Governor’s delegation. The Regional Delegate for Basic Education, Motaze Telelen Dorothy Atabong, expressed joy to those in nursery and primary schools to have come to school on the first day. In song mode, she explained to the pupils the importance of education. Dr. Mbua Hannah Etonde, Regional Delegate for Secondary Education cautioned students in boarding schools to remain only in their campuses and that the students should follow firm instructions from their principals. After visiting schools in Buea, Mutengene and Limbe, Governor Okalia Bilai said that the attendance was very impressive given that it was the first day in school amidst all the challenges. He was hopeful that the turnout of pupils and students would increase by the days. The first day of school yesterday in the region was hindered by what many now call ghost town.

[https://www.cameroon-tribune.cm/article.html/27696/en.html/slow-start-in-south-west 1/1](https://www.cameroon-tribune.cm/article.html/27696/en.html/slow-start-in-south-west%201/1)

# North West : Efforts that Need Encouragement . By Jator Christopher 06 Sept. 2019

More pupils and students are becoming enthusiastic about returning to school as well as parents and guardians are braving fear. Four days into the 2019-2020 school year, the North West Region is yet to experience that explosive vitality that characterise school campuses before the onset of the socio-political and security crisis. By yesterday enrollment in basic education schools in the region rose to 5,062 from less than 1,000 on day one of school reopening. Basic Education Delegate for the region, Wilfred Wambeng Ndong Kimbung, expresses the need for more enthusiasm in parents to send their children to school. "In Bamenda, there is little enthusiasm; only schools that opened their doors on Monday have remained functional, no other school has reopened," he told CT, noting with regrets that teacher attendance has remained discouraging. He called on teachers to be present on campuses every school day as a away of encouraging parents to send children to school. "Even if pupils have not come let teachers be present," he advised. For secondary schools where there is also some improvement in attendance on the close to 500 students registered on day one, no information is being disclosed at the level of the Regional Delegation in Bamenda, as officials prefer to give the media sealed lips. According to official sources and social media, Donga and Mantung has embraced school reopening with a great enthusiasm than any other division in the North West. Almost all schools are said to have received pupils and students. Statistics show that out of 4,632 in nursery and primary schools throughout the region on day three, 4,143 were in Donga Mantung up from 2,707 on day two in the division

[https://www.cameroon-tribune.cm/article.html/27728/en.html/north-west-efforts-that-need 1/1](https://www.cameroon-tribune.cm/article.html/27728/en.html/north-west-efforts-that-need%201/1)

# South West : Serenity Now Reigns In Buea By Kunyui NGONMENYUI 05 Sept. 2019

The Mayor under the supervision of the regional Governor ensured that all business premises were opened yesterday and denizens went about their activities unperturbed. As of yesterday, September 4, 2019, denizens of Buea went about their daily activities unperturbed and businesses were booming in the town. This follows Buea Council resolve to see that no institution is shut down in the municipality in the face of what many now call lockdown in the North West and South West Regions. Beginning from 9 am, Mayor Ekema Patrick Esunge led the Buea Council staff through the streets of Buea Town, Bokwango, Clerk Quarters, Great Soppo, Molyko and the Mile 17 Bus Station where they ensured that all business premises were opened and operational. The activities were supervised by South West Governor, Bernard Okalia Bilai and the region’s top administrators. Ekema Patrick explained to the press that while secessionists who are in the forest are preaching lockdown, they municipal officials who lived in their houses in the city are ensuring that life moves on very normal and that they have been on it for three weeks now. The campaign to have all businesses operational in Buea, he said, is part of efforts to have a free back-to-school in the municipality. “Without these business places open, the pupils and students that we are campaigning to go back to school will not see the effervescence and will lack zeal if the atmosphere looks tense. If life in the city is comfortable and accommodative then learners would find every reason to go back to school just like the parents would find every reason to send their children to school knowing that there is life in the city,” the mayor made it clear. The Buea Council however sealed some shops whose owners were not available to open them up. According to Ekema Patrick, the Buea Council will only come back to that page, which has been covered, in January 2019 when they shall begin the new financial year. The Buea Council has stationed staff in the entire municipality to guarantee that all businesses remain open. The mayor is calling on the population of Buea to remain calm and void fake news while relying on the truth and institutions of the State. On school resumption in Buea Municipality, the mayor noted that it was too early to evaluate performance and participation rate given that school started last Monday. But he was optimistic that they are on the right path.

[https://www.cameroon-tribune.cm/article.html/27707/en.html/south-west-serenity-now-reigns-in 1/2](https://www.cameroon-tribune.cm/article.html/27707/en.html/south-west-serenity-now-reigns-in%201/2)

# NW, SW Crisis : Widows Empowered To Cater For Themselves

By Kimeng Hilton 11 Août 2020

Some 35 women from the North West and South Regions will benefit from the 10 million FCFA initiative sponsored by another widow, Mrs. Jumbam Rebecca Seh. One of the consequences of the ongoing armed conflict in the North West and South West Regions is the plight of women who lose their husbands. Apart from having to cope with the trauma of the loss, these hapless women often struggle to fend for themselves and their children. Moved by their plight, a Yaounde-based lady, Mrs. Jumbam Rebecca Seh, from August 7-8, 2020 in Yaounde gathered 20 widows from the crisis resident in the North West and South West Regions. Mrs. Jumbam lost her husband to the war on March 28, 2020. Addressing the gathering, Jumbam Rebecca narrated how her husband died. “After mourning for so long, my brother-in-law reminded me that other women who lost their husbands in the same war were in a worse situation than me with a home and job. I then decided to do something for these widows, many of whom had long fled their home villages and now live in deplorable conditions in town,” she explained. In April 2020, Mrs. Jumbam and her family, supported by over 350 well-wishers from across the world, put together 10 million FCFA to assist the widows. For a start, 20 widows have already been assisted to carry out small income-generation activities of their choice. Another set of about 15 widows will receive similar assistance in 2021 - giving a total of 35 beneficiaries. Meanwhile, last weekend’s gathering included trauma counselling, with some widows sharing experiences of how they lost their husbands and what befell them after. The women were also received training in small business management and listened to the story of a woman who began with little capital and today is a big business woman. “Our initiative is not a foundation or an association. It is just assistance that was decided on the spur of the moment,” Mrs. Jumbam clarified. “Our hope is that as these widows get busy with their small businesses, it will enable them to receive quicker psychological healing, forget the pain and trauma of what happened to them; and be able to take care of themselves and their children,” she said. “We will follow-up to ensure that the funds are properly utilised,” she promised. Earlier in his exhortation, Rev. Dr Rudolf Banglis of Faith Baptist Church, Anguissa, Yaounde, reminded the widows of God’s caring love that made Him to sacrifice His only son, Jesus Christ, for the sake of humanity. “In the same manner, Jesus has not forgotten the plight of widows,” he assured them.

[https://www.cameroon-tribune.cm/article.html/34206/en.html/nw-sw-crisis-widows-empowered-cater-for 1/2](https://www.cameroon-tribune.cm/article.html/34206/en.html/nw-sw-crisis-widows-empowered-cater-for%201/2)

# Femmes assassinées dans le Nord-Ouest et le Sud-Ouest : afin que nul n’oublie By Yvette Mbassi 09 Sept. 2020

Femmes assassinées dans le Nord-Ouest et le Sud-Ouest : afin que nul n’oublie Après sa sortie la semaine dernière à Yaoundé pour dénoncer ces crimes, c’est par une offre symbolique que le Minproff a célébré hier la mémoire des victimes. Une page entière et en couleur du quotidien national bilingue Cameroon Tribune. En fait de couleurs, il s’agit, en fond, d’un ciel bleu clairsemé de nuages blancs. Y ont été apposées les portraits de Florence Ayafor, Achiri Comfort Tumassang, Mbah Treasure, devenues à leurs corps défendant les visages de la barbarie humaine dans les régions du Nord-Ouest et du Sud-Ouest. Une longue liste, du reste non exhaustive, d’autres femmes tombées sous les coups des séparatistes anglophones et trois colombes, certainement porteuses d’espoir pour une sortie définitive de ce conflit, complètent le tableau rogné du vert-rouge-jaune national. C’est la manière du ministre de la Promotion de la Femme et de la Famille, Marie Thérèse Abena Ondoa, de rendre un hommage mérité aux filles, mères et épouses sauvagement assassinées dans ce qui est connu comme la crise anglophone. Un témoignage de respect et d’estime qui intervient quelques jours après la dénonciation, par le même ministre, de ces actes outrageux sur la gente féminine. S’il est vrai que des communautés tout entières subissent les conséquences de ce conflit dans les régions anglophones du Cameroun, les femmes et les filles sont particulièrement touchées en raison de leur place dans la société et de leur sexe. Il est indéniable qu’elles sont particulièrement exposées à certains risques. L’un des exemples abominable est l’exercice continu de la violence sexuelle et des assassinats, utilisés en tant que méthode de guerre afin de briser non seulement des vies humaines, mais aussi des familles, voire des communautés entières. La crise qui prévaut au Nord-Ouest et dans le Sud-Ouest donne à voir, depuis des mois, le visage hideux de l’utilisation que les personnes malintentionnées peuvent faire des femmes et des filles en temps de conflits : des martyres. Du jamais vu, même dans la mafia. En effet, chez ces hommes sans foi ni loi, où peuvent prospérer des bandits de la pire espèce, les femmes, les filles et les enfants sont sacrés. On n’y touche pas ! Les différends se règlent entre hommes qui en ont ou pas. C’est dire si les séparatistes sont tombés bien bas, en s’attaquant à la femme, porteuse et donneuse de vie. Raison suffisante pour que l’action du ministère de la Promotion de la Femme et de la Famille ne passe pas inaperçue. Elle qui fait de Florence Ayafor et de sa cohorte de compagnes de malheur la mémoire vive de ce conflit. Pour dire assez, c’est assez ! Il y a des limites à tout. Si nous sommes encore des humains, nous ne pouvons guère tolérer plus longtemps que des filles, mères ou épouses soient tuées comme du vulgaire bétail après avoir subi les derniers outrages. C’est tout simplement inacceptable. Et quoi de mieux qu’une voix aussi porteuse que celle du Minproff pour le dire. De la part de l’ensemble des femmes camerounaises et du monde entier.

[https://www.cameroon-tribune.cm/article.html/34801/en.html/femmes-assassinees-dans-le-nord-ouest-le-sud-ouest-afin-que-nul-noublie 1/2](https://www.cameroon-tribune.cm/article.html/34801/en.html/femmes-assassinees-dans-le-nord-ouest-le-sud-ouest-afin-que-nul-noublie%201/2)

# South West: Effective Teaching And Learning Started Yesterday

BHS By Kunyui NGONMENYUI 06 Oct. 2020

The usual hustling and bustling that come with Back-To-School is still timid. The 2020/2021 academic year kicked-off yesterday, October 5, 2020, in the South West Region with effective teaching and learning, though with the large crowd pulling still to be witnessed in the streets and day schools. Echoes across the region indicated of a timid started in day schools. The timidity is blamed on ghost town on Mondays. However, boarding schools witnessed a high turnout of students. In Fako Division, South West Governor, Bernard Okalia Bilai, supervised the Back-To-School in four academic establishments. As he went from class to class, he saluted the learners for choosing education and being in school on day one. He told those in Upper sixth that in the next six years or so they shall be Divisional Officers, Lawyers, Magistrates, Managers, Chief of Cabinets etc because they have chosen education. That they should focus on their studies and learn very well. He added that indiscipline has never paid. In the four schools that the Governor visited, he was impressed with the turnout of pupils and students. At Presbyterian Comprehensive Secondary School (PCSS) Buea, there were 700 students taking lessons. Baptist High School (BHS) Buea counted 302 students, Saker Baptist College Limbe had 749 students and SONARA School (Nursery, Primary and Secondary) recorded 903 learners. In all the schools visited, effective teaching and learning was ongoing. Each of the classes had 50 students with face masks on and their hand sanitizers on their tables. Visitors were scanned and washed their hands before gaining access into the campuses. At PCSS Buea Town, Ntui Perpetua Ojong of Form Five Grammar said that she was impressed with the seriousness of teaching on day one. She had just had English Literature and Geography that morning. Eyambe Mariam Karyn Likowo Lady, Form Five South West: Effective Teaching And Learning Started Yesterday Buea, said though lessons went on smoothly, the first day was very cold. She added that they are certainly going to loosen up as the days unfold. The Governor was accompanied by South West Regional Delegates for Basic, Secondary and Vocational Training. Parents were seen in the schools still seeking admission.

[https://www.cameroon-tribune.cm/article.html/35483/en.html/south-west-effective-teaching-learning-started-yesterday 2/2](https://www.cameroon-tribune.cm/article.html/35483/en.html/south-west-effective-teaching-learning-started-yesterday%202/2)

# Université de Bamenda : l’avenir en numérique

By Marie Christine 12 Oct. 2020

Le séminaire de validation du plan de développement s’est tenue vendredi dernier à Yaoundé sous la présidence du Pr. Jacques Fame Ndongo. Un campus pouvant atteindre le niveau d’excellence nécessaire exigé pour une université émergente. C’est avec cette vision que le Pr. Theresia Nkuo-Akenji, recteur de l’Université de Bamenda a présenté vendredi dernier, devant un parterre de ministres, le plan de développement stratégique du campus. De façon globale, cette université d’Etat a besoin non seulement d’infrastructures modernes, d’enseignants, mais également de plus de visibilité. S’alignant sur le projet E-National Higher Education institué par le chef de l’Etat depuis la survenue de la pandémie de Covid-19, l’Université de Bamenda a opté pour le elearning. Vendredi dernier, à l’ouverture du séminaire de validation du plan stratégique de développement de l’Université de Bamenda, le Pr. Jacques Fame Ndongo, ministre d’Etat, ministre de l’Enseignement supérieur (Minesup) n’a pas manqué d’encourager cette initiative. Selon lui, l’enseignement supérieur répond à trois missions : l’enseignement, la recherche et l’appui au développement. « Mais le chef de l’Etat, a ajouté une quatrième dimension qui est transversale. C’est la gouvernance numérique. Le grand projet E-National Higher Education Network a prévu deux composantes. D’abord le don de 500 000 ordinateurs aux étudiants et ensuite, la construction et l’équipement de 10 centres de développement du numérique universitaire, en raison d’un centre par université d’Etat et un centre à l’Université inter-Etats Cameroun-Congo et un centre national de supervision de l’interconnexion numérique universitaire. » Ces centres entreront bientôt en activité grâce à un accord signé entre le Minesup et la Cameroon Telecommucations (CAMTEL) le 8 septembre dernier. D’après les explications du ministre d’Etat, ces centres permettront aux universités de faire un saut qualitatif vers la gouvernance numérique. Plus concrètement vers l’enseignement à distance. Cette innovation portée par le plan stratégique de développement de l’Université de Bamenda permettra aussi de moderniser les universités et d’accroître leur visibilité au niveau planétaire. « Ainsi, les universités camerounaises seront mieux classées en Afrique et à travers le monde », a assuré le Pr. Jacques Fame Ndongo. Université de Bamenda : l’avenir en numérique Le plan stratégique de développement permettra à cette université de remplir pleinement les fonctions qui reposent sur le triptyque assurance-qualité, professionnalisation et employabilité des jeunes diplômés. Afin d’encourager le recteur, le Pr Jacques Fame Ndongo lui a demandé de redynamiser ses efforts malgré le contexte sanitaire ambiant.

[https://www.cameroon-tribune.cm/article.html/35625/en.html/universite-de-bamenda-lavenir-en 2/2](https://www.cameroon-tribune.cm/article.html/35625/en.html/universite-de-bamenda-lavenir-en%202/2)

# Nord-Ouest, Sud-Ouest : le projet « Education Cannot Wait » évalué

By Mireille ONANA MEBENGA 15 Déc. 2020

L’implémentation et la mise en œuvre dans ces deux régions a été passée au peigne fin les 10 et 11 décembre derniers à Douala. L’Unesco, en collaboration avec les ministères en charge de l’éducation et de la formation au Cameroun, a mis en œuvre la phase II du projet « Education Cannot Wait » dans les régions du Nord-Ouest et du Sud-Ouest. L’atelier organisé ces 10 et 11 décembre à Douala a regroupé des experts de l’Unesco, les points focaux de l’enseignement à distance du Minedub et du Minesec, ainsi que les responsables des centres communautaires d’apprentissage du projet Ecw dans les deux régions concernées. La rencontre de Douala visait à évaluer les forces et faiblesses des approches, les outils et techniques de mise en œuvre, définir les bonnes pratiques, identifier les écarts, pour ensuite formuler des recommandations et des perspectives de pérennisation de ladite expérience. Tout en veillant sur l’équité et l’inclusion en faveur des plus vulnérables. Mabel Muwanga, chargé des opérations au bureau régional de l’Unesco, a confié : « Nous sommes venus partager les expériences vécues au cours de la mise en œuvre des projets dans le Nord-Ouest et le Sud-Ouest ». Il a aussi indiqué que certains projets arrivent à leur terme, et qu’il est bon de partager les défis au cours de leur mise œuvre, les leçons apprises, les succès, mais aussi mener une réflexion sur ce qui va être fait pour que l’éducation ne s’arrête pas dans les deux régions. Chenwi Elvis Fuh, coordonnateur du projet Cohesodec (Community Heath and Social Development for Cameroon), partenaire de l’Unesco, a indiqué que l’implémentation du projet Ecw a encouragé l’éducation, permis la réhabilitation de certains établissements et la remise de matériel didactique. Toujours selon lui, 70% des enfants sont retournés à l’école. Il faut souligner que le projet Ecw est un accompagnement de l’Unesco au profit du Cameroun, pour la continuité de l’éducation dans Nord-Ouest, Sud-Ouest : le projet « Education Cannot Wait » évalué ces deux régions, financé par la Central Emergency Relief Fund (Cerf). Selon l’Unesco, l’interruption de l’apprentissage, l’une des mesures restrictives du gouvernement dans le cadre de la lutte contre la Covid-19, a affecté la scolarisation de 7,2 millions d’élèves et étudiants, dont environ 4,5 millions d’enfants du primaire.

[https://www.cameroon-tribune.cm/article.html/37108/en.html/nord-ouest-sud-ouest-le-projet-education 2/2](https://www.cameroon-tribune.cm/article.html/37108/en.html/nord-ouest-sud-ouest-le-projet-education%202/2)

# Bamenda : Christmas Without Tears in Old Town

By Choves LOH 26 Déc. 2019

spent Christmas with food items generously offered by their son and Minister Delegate at the Ministry of External Relations, Felix Mbayu. The neighborhood of Old Town, the birth place of Metropolitan Bamenda spent the feast of Christmas on December 25th 2019 with little to worry about. There was enough to show for food items with their son; who doubles as the Minister Delegate at the Ministry of External Relations, Felix Mbayu to thank for helping matters with 55 bags of rice, 25 cartons of groundnut oil, 25 cartons of maggi and 25 cartons of tomatoes. Beneficiaries were virtually all the households of Old Town which covers the quarters of Ntambag I, II and III. The food items, worth about 4.2 million FCFA were received with gratitude by inhabitants in difficult times when the socio-political and security crisis has not helped business activities, causing a considerable slow in the economy of the city and the region. Beneficiaries prayed for God to replenish the generous pockets of Felix Mbaya and the peaceful repose of his mother, Late Mama Monica Mounja who during his life time stood solidly by the population of the neighborhoods. The Mbayu family compound at Old Town was the venue where beneficiaries filed out and took home the food items that gave Christmas celebrations a difference. Neighborhood church bells were early to ring on Christmas day proper as inhabitants rushed to messages surrounding the birth of Jesus Christ. It was a rare moment and day to glorify God, the architect of Salvation for believers in Jesus Christ, the saviour. Christmas is also a time for family reunions, a time for reconciliation and a time to inspire hope. towards a new year.

[https://www.cameroon-tribune.cm/article.html/29967/en.html/bamenda-christmas-without-tears-in-old 1/1](https://www.cameroon-tribune.cm/article.html/29967/en.html/bamenda-christmas-without-tears-in-old%201/1)

# North West : Effective Start of Classes in Some Institutions

By BUBA Laura CHIFON 13 Janv. 2020

Students, pupils enjoy hitch-free studies in the regional capital, whereas most village campuses are still shut down. Some nursery, primary and secondary schools in the North West regional capital Bamenda have effectively started a crucial Second Term of their annual programme for 2019-2020. The term which enters the week two today in the region is considered crucial and most intense of the academic calendar, whereby teachers, pupils and students are determined to play their respective roles to ensure success at the end of the academic year. Among the schools CT visited beginning with day one which in the region was on January 7, 2020 (instead of January 6, 2020 as it was in other regions of the country) to the end of last week, comprise public and private institutions, many of whose administration spoke to CT on condition of being anonymous both themselves and their institutions. Pupil, student and teacher attendance have witnessed a marked increase since day one of school resumption. Officials of the Regional Delegation of Basic Education in the North West are giving the media sealed lips as concerns school resumption. At Government Primary School at the Military Camp, out of 265 registered pupils, 253 were present on day one giving a 95 percent attendance. In another private institution which asked not to be named, there was an 85 percent attendance of both teachers and pupils. At GBHS Bayelle, the effervescence was visible. Students could be spotted in queues trying to complete their school fees and finalize other registration modalities. Meanwhile, students whose situations were regularised were receiving lessons in their various classes. In Bamendankwe, students of GBHS cleaned up their classes, got set for lessons and since then have been having regular lessons. Some of their teachers said they are bent at organising catch-up classes to meet up with the lessons they programmed for the term. [https://www.cameroon-tribune.cm/article.html/30320/en.html/north-west-effective-start-of-classes-in-some 1/1](https://www.cameroon-tribune.cm/article.html/30320/en.html/north-west-effective-start-of-classes-in-some%201/1)

# Buea : Council Chased Children From Markets

By Kunyui NGONMENYUI 01 Avril 2020

Parents have been warned that if any child is seen with them in the markets, both will be arrested and their goods seized. On Tuesday March 24, 2020, South West Regional Delegate for Basic Education, Dorothy Motaze Atabong, during an evaluation meeting in the hall of South West Governor’s Office expressed concerns that the government has closed schools for pupils to stay at home to avert the spread of Coronavirus. But the pupils were increasingly seen in local markets in Buea with their parents hawking. The next day, the Mayor of Buea, David Mafani Namange, took to the local markets in Buea chasing out pupils. He told parents that schools were not closed for children be playing around, visit friends and hawk in markets but for them to stay home. That any child seen in the local markets again will have his/her goods seized and will be arrested with the parent. The council has equally been sensitising marketers to sell their food items in hygienic conditions. On this, all the food vendors are expected to display their food items on benches and not on the floor. “Immediately after rain, we don’t know what runoff carries. It might have washed carcasses up the mountain and the consequences might be dangerous on our health,” he explained. Mayor Mafani Namange observed that following previous sensitisations, most traders have made benches but many still have very low benches. To reduce congestions in markets, the Buea Council has ordered that all markets in Buea should operate on daily bases. Public Address System Tours Municipality Many inhabitants in Buea still hold that COVID is a hoax in Cameroon and it is a plot by the government to get money from international donors. Others have insisted that the sickness does not kill blacks. As such, they are free from the virus. To bring the reality of the deadly virus to the population, the Buea Council has put in place a public address system that travel the entire municipality to educate the population. Headed by Musonge Oscar, Public Relation Officer of Buea Council, the team is education the population on the reality of the deadly virus. He presented the number of lives that the deadly virus has claimed worldwide. To avert the virus in Buea, he is pleading with the population to respect gov’t 13 commandments.

[https://www.cameroon-tribune.cm/article.html/31499/en.html/buea-council-chased-children 1/1](https://www.cameroon-tribune.cm/article.html/31499/en.html/buea-council-chased-children%201/1)

# North West : Gendarmerie Intercept 45 Bags of Marijuana By Choves LOH 27 Mai 2020

In another operation, Labogenie's service car, Toyota Fortuna recovered from armed fighters in Bafut, returned to Head of Control mission by Gendarmerie Legion Commander. Elements of the Gendarmerie Legion recently intercepted a truck from Bui division carrying some 45 bags of marijuana in the neighborhood of Sabga, Tubah subdivision. The Legion Commander, Col. Boum Bissoue told CT that the marijuana bags were hidden amongst bags of Irish potatoes, beans and maize and attempts to corrupt the gendarmes failed. The truck is impounded while the owner, two motor boys and the driver are remanded in custody with the State Counsel handling the matter. Col. Boum Bissoue cheered the professionalism and tact of the field elements who succeeded to track the truck for the suspects to answer in court. He said security forces are alert and will not give any bandits and highway robbers any opportunity in their attempt to exploit the socio-political situation to cause pain and suffering in the population. Away from that, a Toyota Fortuna car belonging the National Civil Engineering company, LABOGENIE, forcefully taken from their Service Head a year ago in Nkwen, Bamenda by armed fighters is back at the Yaounde head office of the cooperation. Gendarmerie Legion Commander, Col Boum Bissoue properly identified, controlled and handed over the keys to Labogenie's Head of Control Mission, in Bamenda on May 22, 2020 . Defense and security forces are to thank for the recovery of the car when they raided the fighters' base in the neighbourhood of Bafut, dislodged the fighters who fled, leaving behind the car, some horses, motorcycles etc. The operation from April 25-30 2020 was led by Col. Charles Alain Matiang. Receiving the car the LABOGENIE Head of Control Mission hailed Defense and Security Forces for actions that continue to inspire hope for peace and security of people and property in the face of the socio-political and security crisis rocking the North West region. She told CT that the car was forcefully taken from her sometimes in 2019 and she only saw images of the car on TV screens when the service forces recovered it from the base of the armed fighters in Bafut. [https://www.cameroon-tribune.cm/article.html/32667/en.html/north-west-gendarmerie-intercept-45-bags 1/1](https://www.cameroon-tribune.cm/article.html/32667/en.html/north-west-gendarmerie-intercept-45-bags%201/1)

# Victims of NW, SW Terrorism : Association Appeals For Justice By Eulalia AMABO 24 Févr. 2020

In a press conference in Yaounde on February 21, CAVAT appealed to countries and friends of Cameroon to apply their criminal and conspiracy laws to those perpetuating violence. The Cameroon Association of Victims of Ambazonia Terrorism (CAVAT) has called on countries and friends of Cameroon to apply their criminal, anti-terrorism and violence conspiracy laws to individuals of the selfproclaimed republic called ‘Ambazonia’ who are instigating violent acts in Cameroon. Led by Barrister Emmanuel Nsahlai who is lead Counsel of Victims of ‘Ambazonia’, members of the non-profit association granted a press conference in Yaounde on February 21, 2020 alongside some victims who have either suffered torture or kidnappings, calling on justice while praying for peace to return as soon as possible. According to CAVAT, individuals of the ghost ‘Ambazonia’ republic are in violation of a litany of laws and should countries hosting them apply their laws, the current quagmire rocking the North West and South West Regions will be adequately addressed, coupled with the efforts of government at ensuring a return to peace and stability. “Victims are suffering and need justice. We all need to bring our peace ideas together to stop this humanitarian crisis from degenerating,” Emmanuel Nsahlai stated. On his part, the President of the High Council of Cameroonians Abroad, Dr Samuel Dongmo said women and girls have been physically and sexually brutalised with stories of psychological trauma abound. “Their suffering must not be forgotten and the fundamental principles of the Universal Declaration of Human Rights must not be flouted as far as they are concerned, in particular the right to justice for civilian victims of armed conflicts,” he said. Recounting their ordeal, one of the victims, Elisabeth Mbinglo tearfully narrated how her father, the Fon of Kom was kidnapped, her two uncles killed and she has suffered attacks on her life, all because of the crisis and because she refused to share in the ideologies of the ‘Ambazonians’. Former Principal of Presbyterian School of Science and Technology (PSST) Bafut, Derick Ndue who is currently suffering from partial visual impairment and deformed teeth as a result of his kidnap and torture says he wants justice to prevail. All in all, the association and victims want justice and a return to normalcy in the two English-speaking regions of Cameroon.

[https://www.cameroon-tribune.cm/article.html/30687/en.html/victims-of-nw-sw-terrorism-association-appeals 1/1](https://www.cameroon-tribune.cm/article.html/30687/en.html/victims-of-nw-sw-terrorism-association-appeals%201/1)

# Issa tchiroma Bakary : « il n’y aura ni fédéralisme, ni sécession »

By KIMENG HILTON 18 Janv. 2017

L’intégralité du propos liminaire du ministre de la Communication lors de son point de presse hier à Yaoundé. « Mesdames, Messieurs les journalistes, Je vous souhaite une chaleureuse bienvenue à cette conférence de presse à laquelle je vous ai conviés et qui porte sur la situation socio-politique prévalant dans des localités des régions du Nord-Ouest et du Sud-Ouest, suite aux revendications formulées par certains avocats et enseignants de première langue d’expression anglaise. Comme vous le savez déjà, afin d’examiner ces revendications et d’y apporter autant que faire se peut les réponses les mieux appropriées, le Premier ministre, chef du gouvernement, a été instruit par Son Excellence Monsieur le président de la République, de mettre en place des cadres de dialogue avec les différentes parties prenantes aux problèmes soulevés, à l’effet d’examiner la pertinence desdits problèmes et de proposer aux instances de décision, les solutions susceptibles d’être envisagées. En ce qui concerne les problèmes soulevés par les enseignants, deux comités ont été mis en place par le Premier ministre, chef du gouvernement. Pour ce qui est des questions soulevées par les Avocats, un autre comité a été créé par le Premier ministre, chef du gouvernement. S’agissant du cas des enseignants, je rappelle que six syndicats professionnels des enseignants d’expression anglaise avaient rendu public à l’intention des parents, enseignants, élèves et étudiants, un mot d’ordre de grève pour la date du 21 novembre, comprenant au total 11 points de contestation sur la base desquels la grève projetée allait être entreprise. Une première session de négociations s’était alors tenue à l’initiative du Gouvernement dans la ville de Bamenda. Aucun compromis ne s’étant dégagé de ces assises, le Gouvernement est à nouveau allé à la rencontre des contestataires, et c’est le Premier ministre, chef du gouvernement, qui avait alors personnellement conduit les négociations, se rendant sur place les 25 et 26 novembre 2016. Les syndicats s’étaient alors engagés à suspendre le mot d’ordre de grève dès lors qu’au moins une des 11 demandes formulées dans leur préavis du 06 novembre 2016 trouvait une réponse favorable de la part du Gouvernement au plus tard le 30 novembre 2016. Dans l’intervalle, le Gouvernement avait, conformément à ses engagements et à sa volonté d’œuvrer pour un rapide retour à la normale, satisfait non pas à une, mais plutôt à deux revendications comprises dans le registre de doléances des syndicats, à savoir celles figurant aux points 5 et 9 de leur préavis de grève. C’est à ce titre que, s’agissant du point 5 qui faisait état de l’affectation dans les établissements anglophones, d’enseignants de première langue d’expression française ayant une maîtrise approximative de l’anglais, le chef de l’État a ordonné le recrutement spécial de 1 000 jeunes enseignants dotés d’une parfaite capacité de dispense des enseignements requis en langue anglaise. En plus de cette réponse favorable, le Gouvernement en a apporté une autre au point 9 des revendications sus-citées, qui portait sur la faible capacité financière des établissements privés laïcs et confessionnels à se situer à la hauteur des objectifs de formation optimale de leurs apprenants. Pour y faire suite, le chef de l’État a ordonné la mise en place d’un fonds spécial d’un montant de deux milliards de francs CFA, pour servir de subvention en faveur des établissements d’enseignements privés laïcs et confessionnels. Mais contre toute attente et malgré le respect de ces engagements tant sur le plan de leur consistance que sur celui de leurs formes et de leurs procédures, les interlocuteurs du Gouvernement avaient refusé de lever leur mot d’ordre de grève, contrairement à ce qu’il avait été préalablement convenu, arguant de ce que les revendications satisfaites par le Gouvernement ne constituaient pas des points majeurs dans leur assortiment d’exigences. En dépit de cet état de choses, le Gouvernement avait néanmoins entrepris de rouvrir les négociations en convoquant la tenue d’une session du comité ad hoc le 27 décembre dernier à Bamenda. Et c’est au cours de cette session que les syndicats ont posé deux préalables à la reprise des travaux, le premier étant l’accroissement de la représentation de la région du Sud-ouest dans la composition du comité, et le second étant la libération sans aucune condition, de toutes les personnes mises en cause dans les violences consécutives aux différents mouvements d’humeur. Le Comité ayant fait état de ce qu’il n’avait pas compétence pour connaître de ce second préalable, à savoir la libération de personnes désormais à la disposition de la justice, les six syndicats avaient alors quitté la table des négociations et étaient sortis de la salle. Toujours dans le souci de pérenniser le dialogue et de rechercher une solution concertée aux problèmes soulevés par les syndicats, le Gouvernement est reparti en négociations par le truchement du Comité ad hoc désigné à cet effet, en dates des 12 et 13 janvier derniers à Bamenda. Au cours de cette session, les syndicalistes ont fait passer leurs revendications de 11 à 18, puis de 18 à 21. Chacun de ces points a ensuite fait l’objet d’une analyse concertée, méthodique et rigoureuse. C’est alors qu’au terme de cet examen, les syndicalistes de qui il était attendu la signature du communiqué consacrant la levée du mot d’ordre de grève appelée de tous leurs vœux par les représentants des parents d’élèves et des promoteurs d’établissements présents aux négociations, ont plutôt demandé un temps de réflexion avant de se prononcer ; ce qui leur a été naturellement accordé, pour qu’au bout de trente minutes environ, ils opposent finalement une fin de non-recevoir à la reprise des cours. Et c’est précisément à ce moment qu’ils ont posé sur la table deux préalables à la discussion sur la levée du mot d’ordre de grève : d’abord la mise en liberté sans condition de toutes les personnes interpellées dans le cadre des opérations de police et de maintien de l’ordre suite aux désordres et violences organisés sur la voie publique, et l’institution d’une fédération comme forme de l’État désormais composé de deux États fédérés. Après leur avoir fait connaître d’une part, que le premier préalable relevait de la justice et qu’au demeurant de nombreuses personnes interpellées avaient déjà fait l’objet d’une mise en liberté, et d’autre part que, s’agissant du retour au fédéralisme étatique, le chef de l’État avait déjà souligné que la forme de l’État était non négociable, le président du Comité ad hoc a levé la séance. Dans un communiqué officiel publié le lundi 16 janvier 2017, le président du Comité ad hoc, en la personne, du ministre, directeur de Cabinet du Premier ministre, chef du gouvernement, a tenu à rappeler que le Gouvernement avait déjà mis en œuvre de nombreuses solutions issues des revendications formulées par les syndicats du système éducatif camerounais, au nombre desquels le recrutement spécial de 1 000 enseignants bilingues dans les disciplines des mathématiques, des sciences, des technologies et du français, l’intégration en cours de la première vague des instituteurs contractuels du cycle primaire et des professeurs contractuels des cycles secondaires, l’octroi aux établissements privé du cycle primaire et secondaire, d’une dotation additionnelle de deux milliards de francs CFA, au titre des subventions publiques pour l’année scolaire 2016/2017, l’organisation en 2017 du Forum National de l’Éducation, le redéploiement des enseignants des deux sous-systèmes éducatifs. Il a aussi indiqué que les recommandations faites par rapport à toutes les autres questions techniques avaient d’ores et déjà été transmises à l’attention de Monsieur le Premier ministre, chef du gouvernement, et qu’il fallait dès lors considérer comme achevée la mission interministérielle ad hoc placée sous sa présidence. S’agissant des revendications portées par les avocats, le cadre constitutionnel de dialogue conduit par le ministre délégué auprès du ministre d’État, ministre de la Justice, Garde des Sceaux, et majoritairement constitué des avocats, au total 12 sur les 15 membres qu’il compte, s’est réuni à Yaoundé les 27 et 28 décembre 2016. Les problèmes soulevés ont porté sur les points suivants : - le redéploiement du personnel judiciaire en fonction des particularités entre le Civil Law et le Common Law ; - le redéploiement des Officiers de Police Judiciaires et les Greffiers de Justice ne maîtrisant pas l’anglais; - la création d’une Division spéciale du Common Law au sein de la Cour Suprême, pour connaître des recours provenant des juridictions implantées dans les Régions du Nord-ouest et du Sud-ouest ; - la création d’une Division du Common Law à l’ENAM, et en attendant que des solutions plus complètes à moyen terme, la réactivation à court terme, de la Section du Droit anglais instituée par le décret du 07 décembre 1964 créant une Section Judiciaire à l’ENAM et le décret du 20 octobre 1965 portant organisation de la Division Judiciaire de l’ENAM ; Sur la question de la libération sans condition de toutes les personnes interpellées dans le cadre des mouvements de protestation dans les Régions du Nord-ouest et du Sud-ouest, la réponse du Gouvernement n’ayant manifestement pas été du goût des Avocats partisans de cette thèse, ceux-ci ont préféré quitter la salle. Mesdames, Messieurs les journalistes, Chacun appréciera donc, à l’aune de ce qui vient d’être décrit dans la conduite du processus de dialogue initié par le Gouvernement, le niveau d’engagement constructif et de redevance citoyenne des uns et des autres parmi les interlocuteurs du Gouvernement. Permettez-moi simplement de revenir ici sur les axes majeurs du discours du chef de l’État à la Nation le 31 décembre 2016 lorsqu’il abordait cette question. Tout en rappelant à cette occasion que les libertés politiques et syndicales sont, depuis belle lurette, effectives dans notre pays mais que à l’instar de tout État de droit, ces libertés sont garanties et encadrées par nos lois et règlements, le président de la République affirmait que chaque citoyen était parfaitement fondé à exprimer son opinion sur tout sujet de la vie nationale, y compris en faisant grève, ceci de manière pacifique et à condition qu’une telle grève soit formellement déclarée. Le chef de l’État ajoutait alors qu’il s’agit là, je le cite, « d’un droit fondamental du citoyen, voulu par le peuple camerounais puisque garanti par la Constitution », fin de citation. Dans un tel contexte – et le président de la République l’a également affirmé avec force – seul le dialogue peut permettre d’apporter des solutions durables aux problèmes posés par les uns et les autres ; mais qu’en revanche, rien ne peut justifier ni la violence ou toute autre forme d’exaction, ni l’affrontement de l’autorité, ni même la surenchère verbale. C’est à ce sujet que le chef de l’État affirme que, je le cite : « Nous devons donc rester à l’écoute les uns des autres. Nous devons rester ouverts aux idées mélioratives, à l’exclusion toutefois, de celles qui viendraient à toucher à la forme de notre État. (…) Nous sommes disposés, à la suite et dans l’esprit des artisans de la Réunification, à créer une structure nationale dont la mission sera de nous proposer des solutions pour maintenir la paix, consolider l’unité de notre pays et renforcer notre volonté et notre pratique quotidienne du VIVRE ENSEMBLE. Et cela, dans le strict respect de notre Constitution et de nos Institutions. Dois-je le redire ? LE CAMEROUN EST UN ET INDIVISIBLE ! Il le demeurera », fin de citation. Le chef de l’État l’affirme donc sans ambages : la forme unitaire de l’État est intangible et le Cameroun est et demeure un et indivisible. Il n’y aura donc ni fédéralisme, ni sécession. Ces propos du président de la République ont désormais vocation à servir de boussole et de feuille de route dans l’appréhension que chaque citoyenne et chaque citoyen doivent avoir de cette situation, ainsi que dans la manière dont elle doit être traitée par tous les acteurs institutionnels, politiques ou sociaux. Ceux qui s’en démarquent choisissent de se mettre d’office en marge de la Nation. Ceux-là – je voudrais parler de ceux qui hier encore, paraissaient à nos yeux comme de légitimes porteurs de revendications liées à leurs différentes corporations, mais qui aujourd’hui montrent le visage d’irréductibles contestataires, mus par des visées politiciennes et ayant choisi la terreur et la violence comme vecteurs de combat – ceux-là donc, disais-je, doivent savoir que les Régions du NordOuest et du Sud-Ouest font partie intégrante de l’ensemble de la Nation, et que ce qui concerne nos compatriotes originaires ou installés dans ces Régions intéressent la Nation tout entière. Le Gouvernement ayant choisi d’aller jusqu’au bout des négociations tant qu’elles concernaient des revendications techniques, quels qu’en fussent le nombre et la sensibilité, ces contestataires en sont aujourd’hui à révéler leur véritable agenda, qui ne consiste en rien d’autre qu’en la remise en cause des institutions, à la destruction du socle granitique de la Nation, de son unité, de sa solidarité et de son intégrité territoriale. Il nous revient que ces extrémistes se seraient constitués en un consortium. J’affirme ici qu’un tel consortium est illicite, et qu’autant ceux qui l’auraient fondé que ceux qui y auraient adhéré, devront en répondre devant la loi. De tels réfractaires aux valeurs de la Nation ne laissent donc plus aucun choix à ceux à qui le peuple a conféré la légitimité de l’exercice de sa souveraineté, autre que celui de restaurer l’ordre républicain. Il s’agit là d’une responsabilité à la fois sacerdotale et régalienne du chef de l’État, garant des valeurs fondamentales de la République et du fonctionnement harmonieux des Institutions de la Nation. Le Gouvernement dénonce donc avec la dernière fermeté cette idéologie de la sédition, de la forfaiture et de la division que de tels extrémistes, hier encore embusqués derrière le masque de revendications professionnelles, veulent porter au cœur de l’espace public et de la sérénité de la Nation. Ces marginaux de la République doivent savoir à quoi ils s’exposent en persistant dans cette voie. On a en effet pu noter que des parents étaient intimidés, des élèves et des écoliers terrorisés, molestés, menacés de mort et de toutes sortes de sévices au seul motif qu’ils revendiquaient leur droit légitime à l’éducation et à la formation. Cela est inadmissible dans un État de droit. Il ne s’agit là ni plus ni moins que de ces actes ou menaces prévus et réprimés par la réglementation nationale contre le terrorisme, tel que stipulé à l’article 2 de la loi n° 2014/028 du 23 décembre 2014 portant répression des actes de terrorisme. Ces fauteurs de troubles devront donc en répondre le moment venu, de même que ceux qui, par médias interposés, et particulièrement à travers les réseaux sociaux, répandent la terreur et profèrent des menaces de mort à quiconque oserait braver leurs injonctions au boycott de l’éducation des jeunes et à l’organisation des villes mortes. Au nom du Gouvernement, je voudrais prendre à témoin nos partenaires de la communauté internationale sur la gravité de cette situation. Car, aucun pays au monde n’a jamais accepté de se laisser ainsi prendre en otage par une poignée de dissidents dont la prétention est de nier aux autres citoyens la jouissance de leurs droits les plus légitimes, refusant à des familles entières et à des tout jeunes concitoyens parfaitement innocents, l’aspiration à l’éducation et à la préparation de l’avenir de tout un peuple, au nom de prétentions purement politiciennes. À ce sujet, je rappelle à tous les médias leur devoir de citoyenneté et de responsabilité dont l’exigence est encore plus accrue en pareilles circonstances. Je leur indique qu’il n’y a pas de place au Cameroun pour des médias appelant à la haine de l’autre, à l’insurrection populaire, au défi de l’autorité publique ou à toutes autres formes de désordre. J’adresse aux forces de maintien de l’ordre les félicitations du Gouvernement. Sans céder à la provocation, elles s’acquittent de leur devoir, avec maîtrise et professionnalisme pour maintenir la paix et la tranquillité publique. En tout état de cause, le président de la République, chef de l’État et garant de la souveraineté nationale donne l’assurance au peuple camerounais qu’il prendra toutes ses responsabilités en conformité avec la Constitution ainsi que les lois et règlements de la République, pour un rapide retour au fonctionnement normal des affaires de la Nation, où que les problèmes viennent à survenir, qu’il s’agisse des Régions du Nord-Ouest et du Sud-Ouest aujourd’hui concernées, ou d’autres points du territoire national. Pour ce faire, le chef de l’État bénéficie du soutien du peuple camerounais tout entier, dans l’objectif suprême de préservation et de pérennisation du précieux héritage que constitue la vision unitaire du pays. Je voudrais à ce sujet, rappeler, et afin que nul n’en ignore, les propos du chef de l’État dans son discours à la Nation le 31 décembre 2016. Je le cite : « Ne l’oublions jamais, nous marchons sur les pas des pères fondateurs de notre pays, de nos héros nationaux, qui ont versé leur sang pour léguer à la postérité une nation unie dans sa diversité. L’unité du Cameroun est donc un héritage précieux avec lequel nul n’a le droit de prendre des libertés. Et quelle que soit la pertinence d’une revendication, celle-ci perd toute légitimité, sitôt qu’elle compromet, tant soit peu, la construction de l’unité nationale », fin de citation. Je vous remercie de votre aimable attention.»

[https://www.cameroon-tribune.cm/article.html/4539/fr.html/cameroon-tribune 1/5](https://www.cameroon-tribune.cm/article.html/4539/fr.html/cameroon-tribune%201/5)

# Nord-Ouest et Sud-Ouest : il faut sauver l’école By 17 Janv. 2017

Au 8e jour du second trimestre, élèves et étudiants attendent toujours de reprendre les classes. La seconde phase des travaux du Comité interministériel ad hoc chargé d’examiner et de proposer des solutions aux préoccupations soulevées par les syndicats d’enseignants anglophones s’est achevée tard dans la nuit de vendredi à samedi avec l’examen de 20 points, contre 11 qui figuraient préalablement au rang des revendications. Le gouvernement avait alors accepté d’élargir le champ des discussions à d’autres points présentés par les syndicats d’enseignants anglophones. Avant l’ouverture des travaux de jeudi dernier, une vingtaine de personnes, interpelées au cours des événements violents du 8 décembre 2016 à Bamenda avaient recouvré la liberté. Des signes qui laissaient présager d’une décrispation de l’atmosphère pour la suite des discussions entre le gouvernement et les syndicats. Un premier indice avait été observé lors des travaux du Comité interministériel ad hoc de la semaine dernière présidé par le Pr. Ghogomu Paul Mingo, par ailleurs, directeur de Cabinet du Premier ministre, chef du gouvernement. L’autre signe de décrispation attendu par les parents et élèves était la reprise des classes hier lundi, huit jours après la rentrée du second trimestre. Il n’en a malheureusement rien été dans les régions du Nord-Ouest et du Sud-Ouest où écoles, lycées, collèges et amphithéâtres continuent d’afficher portes closes, au grand désespoir de ces milliers d’élèves et étudiants, dont certains ont parcouru des centaines de kilomètres pour l’acquisition du savoir dans les établissements de cette partie du pays. Selon des sources crédibles, certains ont déjà rejoint les différentes cités universitaires dans l’attente de la reprise des classes. On ne peut donc que comprendre la déception de ceux-ci et des autres, face à la situation qui perdure et qui a débuté quelques semaines avant la fin du premier trimestre de l’année scolaire et académique et en cours. Une situation qui s’est accentuée avec le communiqué rendu public par le fameux « Consortium » regroupant les syndicats d’enseignants et les avocats et qui, appelait à des « villes mortes » dans les deux régions pour les journées d’hier et aujourd’hui. [https://www.cameroon-tribune.cm/article.html/4518/en.html/nord-ouest-sud-ouest-il-faut-sauver-lecole 1/1](https://www.cameroon-tribune.cm/article.html/4518/en.html/nord-ouest-sud-ouest-il-faut-sauver-lecole%201/1)

# Régions du Nord-Ouest et du Sud-Ouest: l’appel des évêques du Cameroun

By René Emmanuel Sadi 17 Janv. 2017

Le communiqué rendu public à l’issue des travaux de leur 40e séminaire annuel tenu à Mamfé. « Du 7 au 14 janvier 2017, les évêques du Cameroun ont tenu au Centre d’accueil de Mamfe leur 40e séminaire annuel dont les travaux ont porté sur l’approfondissement de l’exhortation apostolique « Amoris Laetitia », et l’examen de la mise en application de l’accord-cadre entre le Saint-siège et l’Etat du Cameroun. Les travaux se sont déroulés sous la présidence effective de S.E. Mgr Samuel Kleda, archevêque de Douala et président en exercice de la Conférence épiscopale nationale du Cameroun (CENC). La messe solennelle d’ouverture en la fête de l’épiphanie, le dimanche 8 janvier 2017, a été présidée par Mgr Andrew Nkea, évêque de Mamfe. La cérémonie d’ouverture a eu lieu en présence du préfet du département de la Manyu, des autorités administratives et de nombreux fidèles. Elle a été ponctuée par trois interventions : le mot d’accueil du maire de Mamfe, celui de Mgr Andrew Nkea et enfin l’allocution du président de la CENC qui a saisi l’occasion pour préciser les enjeux dudit séminaire. Les travaux proprement dits ont consisté en l’appropriation de l’exhortation apostolique « Amoris Laetitia ». Trois exposés portant sur les dimensions pastorale, éthique et juridique de cette exhortation, ont été présentés respectivement par les abbés Bertrand Salla, Ernest Timchia Tubuo et Mgr Andrew Nkea. Au terme des échanges qui en sont suivis, les évêques ont donné dans un message des orientations en vue d’un renouvellement et d’une redynamisation de la pastorale familiale et conjugale dans notre Eglise. Les évêques se sont penchés sur la situation sociale qui prévaut dans les régions du Sud-Ouest et Nord-Ouest. A ce sujet, ils ont rencontré les représentants des enseignants, des avocats, et de la société civile. Les évêques recommandent la poursuite d’un dialogue franc et sincère entre l’Etat et les protagonistes. Ils en appellent au calme, à la non-violence et à la prière pour une solution durable et définitive. Ils demandent que soit récitée en chaque eucharistie une oraison impérée pour la paix dans le pays. Les évêques ont accueilli dans la joie leurs confrères : Mgr Philippe Alain Mbarga (evêque d’Ebolowa), Mgr Emmanuel Dassi Youfang (évêque auxiliaire de Bafoussam) et Mgr Joseph-Marie Ndi Okalla (évêque nommé du diocèse de Mbalmayo). Les évêques ont procédé à la nomination de quelques membres dans certaines commissions épiscopales : 1. Commission épiscopale pour l’œcuménisme et le dialogue interreligieux : Mgr Joseph-Marie Ndi Okalla (membre) 2. Commission épiscopale pour la liturgie et le culte divin : Mgr Emmanuel Abbo (membre) 3. Commission épiscopale pour la vie consacrée : Mgr Philippe Alain Mbarga (membre) Commission épiscopale Caritas-Cameroun : Mgr Emmanuel Dassi Youfang (membre) Les évêques remercient Mgr Andrew Nkea ainsi que les autorités du département de la Manyu et les fidèles du diocèse de Mamfe pour la parfaite organisation du séminaire, pour l’accueil chaleureux et la générosité débordante qui ont favorisé une atmosphère propice à la réflexion et à la prière. Ce séminaire a été rythmé par les prières et les célébrations eucharistiques durant toute la semaine. La messe pontificale de clôture a été présidée par S.E. Mgr Piero Pioppo, nonce apostolique au Cameroun et en Guinée équatoriale, qui a exhorté les fidèles à accueillir les diversités comme des atouts pour consolider leur unité. Le prochain séminaire des évêques se tiendra dans le diocèse de Bafia, du 6 au 13 janvier 2018. Fait à Mamfe, le 14 janvier 2017, Mgr Benoît KALA secrétaire general

[https://www.cameroon-tribune.cm/article.html/4517/en.html/regions-du-nord-ouest-du-sud-ouest-lappel-eveques-du-cameroun 1/2](https://www.cameroon-tribune.cm/article.html/4517/en.html/regions-du-nord-ouest-du-sud-ouest-lappel-eveques-du-cameroun%201/2)

# Préoccupations des enseignants anglophones: les recommandations transmises au PM By YEM Henry KISEH (Chief Of Centre For Communication Cameroon Embassy –Belgium) 17 Janv. 2017

Le communiqué rendu public par le président du Comité interministériel ad hoc à la suite de la seconde phase des discussions la semaine dernière. « Le Professeur Ghogomu Paul Mingo, directeur de Cabinet du Premier ministre, chef du gouvernement, président du Comité interministériel ad hoc chargé d’examiner et de proposer des solutions aux préoccupations soulevées par les syndicats des enseignants anglophones, porte à la connaissance de l’opinion nationale et internationale que les travaux de la deuxième session ordinaire dudit Comité se sont tenus à Bamenda les 12 et 13 janvier 2017. Au cours de cette session, les 20 points soulevés par les syndicalistes du sous-système éducatif anglophone ont été examinés avec sérieux, rigueur et objectivité par l’ensemble des participants, dans une atmosphère empreinte de convivialité et de fraternité. Les conclusions de ces travaux techniques sont déjà soumises à Monsieur le Premier ministre, chef du gouvernement, pour la très haute sanction de S.E. Monsieur le président de la République, chef de l’Etat. Toutefois, en dépit de l’analyse méthodique, rigoureuse et exhaustive de l’ensemble des points inscrits à l’ordre du jour, sur proposition des syndicalistes, le communiqué consacrant la levée du mot d’ordre de grève n’a pas été signé, malgré l’insistance des représentants des parents d’élèves et des promoteurs d’établissements qui, lors des travaux, ont fortement appelé à la reprise des cours. Cette situation hautement préjudiciable est le fait de certains syndicalistes intransigeants. Ceux-ci ont exigé l’examen préalable des sujets sans rapport avec les problèmes relatifs au sous-système éducatif anglophone. En effet, les syndicats ont sollicité la libération inconditionnelle de tous les gens interpellés au cours des derniers évènements dans les régions du Nord-Ouest et du Sud-Ouest, et ont exprimé leur option pour une fédération à deux Etats, dans la gestion des affaires publiques. Le président du Comité rappelle que, s’agissant de la fédération, le président de la République a souligné, dans son message à la Nation, le 31 décembre 2016, que la forme de l’Etat était non négociable. Le président du Comité ad hoc rappelle que le gouvernement a déjà tenu compte de plusieurs revendications récentes formulées par les syndicats du système éducatif camerounais. Il est loisible de le constater à travers les décisions fermes suivantes: recrutement spécial, imminent, de 1 000 enseignants bilingues (mathématiques, sciences, technologies, french); intégration prochaine de la première vague des instituteurs contractuels du cycle primaire et des professeurs contractuels du cycle secondaire; octroi, aux établissements privés des cycles primaire et secondaire, d’une dotation additionnelle de deux milliards de F CFA en guise de subventions pour l’année scolaire 2016/ 2017; organisation, en 2017, du Forum National de l’éducation en cours de préparation au sein de la Commission interministérielle chargée d’examiner et de proposer des solutions aux problèmes concernant l’ensemble du système éducatif camerounais. Les recommandations faites par rapport à toutes les autres questions techniques sont d’ores et déjà transmises à l’attention de M. le Premier ministre, chef du Gouvernement. Le président du Comité ad hoc remercie tous les membres du Comité ad hoc qui ont œuvré, avec sincérité, patience et objectivité, à l’examen complet des points inscrits à l’ordre du jour. Ce travail est, aujourd’hui, terminé ! Le président du Comité ad hoc condamne avec la dernière énergie, ceux qui prennent en otage les élèves et les étudiants, pour des objectifs politiques, nonobstant le droit à l’éducation qui est une importante prescription de notre Constitution. Le président du Comité ad hoc réitère la ferme détermination du gouvernement à poursuivre le dialogue sur les questions relatives à l’amélioration de la qualité du système éducatif camerounais (sous-systèmes anglophone et francophone), dans le cadre de l’instance statutaire créée à cet effet, le 8 novembre 2016, par M. le Premier Ministre, Chef du Gouvernement. Le Gouvernement demande (1°) aux syndicalistes de lever le mot d’ordre de grève ; et (2°) aux parents des élèves et étudiants inscrits dans les écoles, collèges, lycées, Universités du Nord-Ouest et du Sud-Ouest, aux syndicalistes et responsables des établissements scolaires ou universitaires publics ou privés de ces deux régions, d’autoriser les élèves et étudiants à rejoindre, dans les meilleurs délais, les salles de cours. L’Etat assurera avec efficacité la sécurité de la jeunesse scolaire et universitaire du Cameroun, tout comme il garantit celle de tous ceux qui, Camerounais ou étrangers, vivent dans notre pays. L’Etat est également disposé, comme par le passé, à améliorer constamment et dans le respect des normes académiques universelles, la qualité et le rayonnement du système éducatif camerounais. » Fait à Yaoundé, le 16 janvier 2017 Le président du Comité ad hoc,[https://www.cameroon-tribune.cm/article.html/4506/en.html/preoccupations-enseignants-anglophones-les-recommandations-transmises-au-pm 1/2](https://www.cameroon-tribune.cm/article.html/4506/en.html/preoccupations-enseignants-anglophones-les-recommandations-transmises-au-pm%201/2)

# Régions du Nord-Ouest et du Sud-Ouest: le gouvernement dénonce la surenchère

». By 18 Janv. 2017

Face à l’intransigeance observée chez les représentants des syndicats, des associations ont été interdites hier. Ainsi donc, les travaux du Comité interministériel ad hoc chargé d’examiner et de proposer des solutions aux préoccupations soulevées par les syndicats des enseignants anglophones sont achevés, comme l’indique le communiqué de presse rendu public avant-hier par son président, le Pr. Ghogomu Paul Mingo. Même si ce dernier rappelle la « détermination du gouvernement à poursuivre le dialogue sur les questions relatives à l’amélioration du système éducatif camerounais (sous-systèmes anglophone et francophone), ceci dans le cadre de l’instance statutaire créée à cet effet par le Premier ministre le 8 novembre 2016. Pour l’ensemble de l’opinion camerounaise, l’heure est aujourd’hui au respect des différents engagements des parties pour permettre une reprise sereine des classes dans ces deux régions. Les cours ici ayant été interrompus depuis la fin du mois de novembre 2016. L’on peut déjà signaler ici que le gouvernement n’a pas attendu la fin des travaux, survenue tard dans la nuit de vendredi à samedi dernier pour commencer à lâcher du lest. L’on peut signaler l’annonce du recrutement spécial de 1 000 enseignants bilingues, l’intégration prochaine de la première vague des instituteurs contractuels du cycle primaire et des professeurs contractuels du cycle secondaire, l’octroi aux établissements privés des cycles primaire et secondaire, d’une dotation additionnelle de deux milliards de F en guise de subvention pour l’année scolaire en cours. Il est, en outre, prévu l’organisation au cours de cette année du Forum national de l’éducation. Il convient, par ailleurs, de souligner la décision prise par les pouvoirs publics de libérer vingt-un jeunes qui avaient été interpellés au cours des manifestations du 8 décembre 2016 à Bamenda qui avaient vu un certain nombre de biens publics et privés endommagés. Des mesures qui ont été rappelées hier par le ministre de la Communication Issa Tchiroma Bakary lors de son échange avec la presse hier. Au même moment, le ministre de l’Administration territoriale et de la Décentralisation, René Emmanuel Sadi a signé un arrêté interdisant sur toute l’étendue du territoire national, les activités d’un certain nombre de groupements. Il s’agit du « Southern Cameroons National Council » et le « Cameroon Anglophone Civil Society Consortium [https://www.cameroon-tribune.cm/article.html/4540/en.html/regions-du-nord-ouest-du-sud-ouest-le-gouvernement-denonce-la-surenchere 1/1](https://www.cameroon-tribune.cm/article.html/4540/en.html/regions-du-nord-ouest-du-sud-ouest-le-gouvernement-denonce-la-surenchere%201/1)

# Buea: Socio-economic Activities Resume

The South West regional chief town of Buea is alive since January 18, 2017 following two days of grounded activities resulting from the ghost town operations. News of Cameroon’s 2-1 win over Guinea Bissau, Wednesday, January 18, 2017 night sweetened the minds of the people. Inhabitants of the key towns of the South West Region awoke to normal activities across the region. From Menji in Lebialem to Kumba in Meme, passing through Bangem in Kupe-Muanenguba, Mamfe in Manyu, Mundemba in Ndian and Limbe in Fako these divisional headquarters echoes harmony, hustle and bustle since Wednesday. Some agitation earlier noted in neighouring towns of Buea such as Muyuka, Ekona and Mutengene were quickly quelled. At Ekona, a group of youngsters playing football near the main road engaged in a standoff with the forces of law and order after their ball was crushed by a passing vehicle. Travellers account said the teenagers insisted on getting money to buy a new ball. Since it was near a check point, the witness said, the forces intervened and the confrontation degenerated into violence, leaving wounded persons on both sides. However, the various localities are breathing a new found calm, as traffic between Buea and Kumba, passing through Ekona and Muyuka was quickly restored. Apart from empty schools and courtrooms in the Region, a conducive atmosphere for socio-economic activities is now the order of the day. Throughout Thursday, January 19, discussions in clustered groups and especially in public places centred on two main issues; the ongoing African Nations Cup competition in Gabon and the arrest of ring leaders of the Anglophone Civil Society Consortium. [https://www.cameroon-tribune.cm/article.html/4605/en.html/buea-socio-economic-activities-resume 1/1](https://www.cameroon-tribune.cm/article.html/4605/en.html/buea-socio-economic-activities-resume%201/1)

# Nord-Ouest et Sud-Ouest: le gouvernement prend ses responsabilités

By 20 Janv. 2017

En interdisant avant-hier les activités du SCNC et du « Consortium », les pouvoirs publics entendent rétablir l’autorité de l’Etat. Exit donc désormais le «Southern Cameroons National Council » (SCNC) et le « Cameroon Anglophone Civil Society Consortium » (CACSC), deux associations qui, bien que n’ayant pas d’existence légale, se faisaient entendre dans les régions du Nord-Ouest et du Sud-Ouest. Avant-hier, le ministre de l’Administration territoriale et de la Décentralisation, René Emmanuel Sadi, s’appuyant sur un ensemble de faits a constaté leur nullité et interdit leurs activités. En clair, ces deux structures n’ont pas le droit d’exercer une quelconque activité sur l’ensemble du territoire de la République du Cameroun. Pour en arriver là, il faut partir des mouvements corporatistes observés au sein des syndicats d’enseignants et des avocats de ces régions. Pour le premier cas, onze revendications ont été formulées au gouvernement. Bien que des débuts de solutions aient été apportés par les pouvoirs publics à ces problèmes soulevés, les enseignants ont appelé à un mot d’ordre de grève qui est effectif depuis la fin du mois de novembre 2016 dans ces deux régions. Les discussions ouvertes avec le gouvernement dans le cadre du Comité interministériel ad hoc, mis sur pied par le Premier ministre, chef du gouvernement le 8 novembre 2016 ont permis l’examen, non plus de onze points, mais d’une vingtaine soulevés par ces syndicats. Malgré la conclusion des travaux du Comité, la semaine dernière, avec les décisions que l’on sait (l’annonce du recrutement spécial de 1 000 enseignants bilingues, l’intégration prochaine de la première vague des instituteurs contractuels du cycle primaire et des professeurs contractuels du cycle secondaire, l’octroi aux établissements privés des cycles primaire et secondaire, d’une dotation additionnelle de deux milliards de F en guise de subvention pour l’année scolaire en cours, libération de personnes ayant pourtant participé à la destruction de biens publics et privés…), rien n’y a fait. Les élèves et étudiants de ces régions attendent toujours de reprendre le chemin de l’école. S’agissant des avocats, des discussions ont également été ouvertes dans le cadre d’un Comité présidé par le ministre délégué auprès du ministre de la Justice. Ses conclusions ont été transmises à la hiérarchie. Mais les cours et tribunaux de ces deux régions restent toujours fermés. L’on a simplement assisté à une curieuse jonction des causes entre les deux corporations, sous l’appellation de « Consortium » qui a commencé à exiger la révision de la forme actuelle de l’Etat. Des structures qui ont été rejointes dans ces revendications par le SCNC. Des actes de violence sur des enfants essayant d’aller à l’école ont ainsi été perpétrés dans ces régions, des biens publics et privés ont été détruits du fait de ces structures qui essayaient ainsi d’établir une situation de nondroit dans le Nord-Ouest et le Sud-Ouest. Le gouvernement a décidé d’agir pour rétablir la légalité.

[https://www.cameroon-tribune.cm/article.html/4599/en.html/nord-ouest-sud-ouest-le-gouvernement-prend-ses-responsabilites 1/2](https://www.cameroon-tribune.cm/article.html/4599/en.html/nord-ouest-sud-ouest-le-gouvernement-prend-ses-responsabilites%201/2)

# Nord-Ouest et Sud-Ouest: le RDPC appelle à la reprise des cours

et By 23 Janv. 2017

Nord-Ouest et Sud-Ouest: le RDPC appelle à la reprise des cours Le communiqué de presse du Comité central parvenu à notre Rédaction. Le secrétaire général du Comité central du Rassemblement démocratique du peuple camerounais, Monsieur Jean NKUETE, communique: «Depuis le début des tensions sociales qui ont notamment hypothéqué le fonctionnement normal des établissements scolaires et universitaires ainsi que des tribunaux dans les régions du Nord-Ouest et du Sud-Ouest, le Rassemblement démocratique du peuple camerounais n'a cessé de prôner l'apaisement, en appelant à un dialogue positif et pragmatique en vue de trouver des solutions adéquates aux problèmes professionnels posés, dans le respect de la légalité républicaine. A cet effet, de nombreuses missions du parti ont été dépêchées sur le terrain et le secrétaire général du Comité central s'est personnellement rendu sur les lieux, à la rencontre des militantes, militants, amis et sympathisants du RDPC, ainsi que de nos compatriotes de bonne volonté. A Buéa comme à Bamenda, le 'secrétaire général du Comité central a délivré un message d'apaisement en réitérant les appels du RDPC au dialogue, à la responsabilité individuelle et collective et au respect de l'ordre républicain dans la recherche des solutions appropriées. Evoquant le parcours historique de la construction de l'Etat, le secrétaire général du Comité central a invité les militants et les populations à veiller jalousement à la sauvegarde de l'unité nationale qui constitue une conquête fondamentale et irréversible, un gage de la crédibilité de notre pays dans le monde, et partant, l'un des moteurs de son développement équilibré et durable. A cet égard, il leur a demandé de ne jamais perdre de vue l'expérience des difficultés que le Cameroun a connues avant l'indépendance et de se souvenir de l'expérience particulièrement douloureuse de certains pays, lorsqu'ils ont malencontreusement tenté de remettre en cause l'unité nationale. En outre, le secrétaire général du Comité central a mis en garde les uns et les autres contre les velléités de récupération et d'instrumentalisation du mouvement de revendication des enseignants et des avocats à des fins politiciennes par des groupuscules dont le mode opératoire s'appuie sur la désinformation, spécialement à travers les réseaux sociaux, l'instauration de la peur au sein des populations, la violence et les menaces de toutes sortes. L'évolution de la situation a malheureusement confirmé les craintes du RDPC. En effet, en dépit des mesures gouvernementales prises en réponse à certaines doléances précises des enseignants et des avocats; surtout, malgré les annonces fortes du président de la République, président national du RDPC, Son Excellence Paul BIYA, qui a procédé, dans son important message à la nation du 31 décembre 2016, à une analyse clairvoyante de la situation, réaffirmant, de manière claire et sans équivoque, l'unité de la nation l'indivisibilité de l'Etat, un blocage est intervenu dans les négociations. L'on est ainsi passé des doléances catégorielles des enseignants et des avocats à des revendications de nature politique sur la remise en cause de la forme unitaire de l'Etat camerounais, désormais posées comme préalables à la poursuite du dialogue. Face à cette dérive, le gouvernement a été amené à prendre des mesures visant à restaurer l'autorité de l'Etat et à garantir la sécurité des biens et des personnes, tout en poursuivant le dialogue avec les instances syndicales légalement constituées, reconnues et responsables. Considérant le nouveau contexte, le secrétaire général du Rassemblement démocratique du peuple camerounais invite les militantes, militants, amis et sympathisants du RDPC et nos compatriotes de bonne volonté dans les régions du Nord-Ouest et du Sud-Ouest, à relever le défi de la peur et à reprendre le chemin de la vie normale, en vaquant à leurs occupations quotidiennes et habituelles, mais surtout en envoyant leurs enfants à l'école, car tout est mis en œuvre par le gouvernement pour assurer la sécurité, la vie paisible et la tranquillité dans les deux régions. A cet égard, il invite les militantes, militants, amis et sympathisants du RDPC ainsi que tous nos compatriotes de bonne volonté, d'une part, à appuyer les autorités administratives et de maintien de l'ordre dans leur action pour rétablir la paix, d'autre part, à former des groupes de soutien, de vigilance et de solidarité afin de faciliter le retour et l'accompagnement des élèves et étudiants dans les établissements scolaires et universitaires des deux régions concernées. Pour ce faire, le secrétaire général du Comité central demande aux chefs des délégations permanentes régionales et départementales du Comité central, aux présidentes et présidents des sections, sous-sections, comités de base et cellules RDPC, OFRDPC et OJRDPC de veiller toujours davantage au renforcement de l'encadrement des militantes, des militants et de nos compatriotes dans leurs unités politiques respectives, pour la reprise du cours normal des activités et particulièrement l'accompagnement des élèves et étudiants dans leurs établissements. Il les invite également à redoubler de vigilance afin de déjouer toutes formes d'action visant à semer la terreur pour décourager et démobiliser les populations. Parallèlement, il demande à l'ensemble des responsables locaux du parti, des militantes, militants, amis, sympathisants et compatriotes de bonne volonté sur l'ensemble du territoire national, de veiller à la préservation de l'unité nationale, en évitant de tomber dans le piège de la désinformation et de l'intimidation distillées par les sirènes de l'apocalypse et les réseaux sociaux, car ce qui fonde la force et la spécificité du Cameroun, c'est bien son identité façonnée à partir de sa diversité socioculturelle, linguistique et géophysique, des valeurs de la République et de notre Histoire. Enfin, le secrétaire général du Comité central réaffirme le soutien sans faille du RDPC au gouvernement en action, sous l'autorité du J'résident de la République, chef de l'Etat, et sous la conduite du Premier ministre, chef du gouvernement, en vue de trouver des solutions, non seulement aux problèmes posés dans le Nord-Ouest et le SudOuest, mais également à l'ensemble des préoccupations des Camerounaises et des Camerounais relatives au développement de toutes les régions du pays ». Yaoundé, le 20 janvier 2017 Le secrétaire à la Communication (é) Pr Jacques FAME NDONGO

[https://www.cameroon-tribune.cm/article.html/4679/en.html/nord-ouest-sud-ouest-le-rdpc-appelle-la-reprise 1/3](https://www.cameroon-tribune.cm/article.html/4679/en.html/nord-ouest-sud-ouest-le-rdpc-appelle-la-reprise%201/3)

Emeutes dans le Nord-Ouest et le Sud-Ouest: Des meneurs interpellés Emeutes dans le Nord-Ouest et le Sud-Ouest: Des meneurs interpellés Le communiqué de presse du ministre de la Communication parvenu à notre Rédaction. Le ministre de la Communication porte à la connaissance de l’opinion nationale et internationale qu’en dépit du dialogue engagé par le gouvernement, pour rechercher des solutions aux revendications des enseignants et des avocats des régions du Nord-Ouest et du Sud-Ouest, des extrémistes ont lancé des appels aux villes mortes et organisé dans ce cadre, et à d’autres occasions, des violences et des exactions diverses contre les citoyens et leurs biens. Ils se sont également attaqués aux forces de l’ordre et aux édifices publics. Certains d’entre eux se réclament du « SouthernCameroons National Council » (SCNC) et du « Cameroon Anglophone Civil Society Consortium » (CACSC), organisations fonctionnant dans l’illégalité et dont la nullité a été constatée par arrêté du ministre de l’Administration territoriale et de la Décentralisation, en même temps que leurs activités étaient strictement interdites. Dans le cadre de l’enquête judiciaire ouverte pour établir les responsabilités de ces exactions qui ont causé d’importants dégâts matériels et humains, un certain nombre de personnes, dont les nommés FontemAforteka’aNeba et Nkongho Félix Agbor Balla ont été interpellés et placés sous main de la Justice. D’autres restent recherchés pour les mêmes motifs. Les intéressés bénéficieront, cela va de soi, de toutes les garanties légales pour un procès équitable. Le gouvernement est déterminé à mettre en œuvre tous les moyens nécessaires pour que la paix, la sécurité publique, l’unité nationale et l’intégrité territoriale soient préservées. Il demande aux élèves, étudiants, enseignants et autres acteurs économiques de vaquer tranquillement à leurs occupations. Yaoundé, le 19 janvier 2017 Le ministre de la Communication, (é) ISSA TCHIROMA BAKARY By KIMENG HILTON 21 Janv. 2017

[https://www.cameroon-tribune.cm/article.html/4611/en.html/emeutes-dans-le-nord-ouest-le-sud-ouest-meneurs-interpelles 1/1](https://www.cameroon-tribune.cm/article.html/4611/en.html/emeutes-dans-le-nord-ouest-le-sud-ouest-meneurs-interpelles%201/1)

# Bamenda: Commercial Activities Gradually Resume

Confrontation between forces of law and order and population on Thursday morning froze activities in some parts of the town. Bamenda woke up on January 18, 2017 to see its streets as busy as a beehive following the ghost town operations of the two previous days. But on Thursday, January 19, 2017 activities were grounded in some parts of the town due to confrontation between the forces of law and other and the population. This was caused by the arrest of some youths at Ntamulung neighbourhood of Bamenda. When the population got news of the arrest of the young men, they went wild and mounted barricades thus pushing the forces of law and order to react with tear gas and water cannons. This grounded activities in some parts of the town like the main commercial streets, Ntarinkon amongst others. It is also worth mentioning that since Tuesday evening there is no Internet connection, thus making it difficult for banks and money transfer companies to operate. This has made life difficult as journalists are finding it difficult to file reports to their various newsrooms. At press time some streets in Bamenda were empty as all schools still remain closed. The forces of law and order were present to ensure that order reigns in the city. By Carine ELEME (Stagiaire 20 Janv. 2017

[https://www.cameroon-tribune.cm/article.html/4604/fr.html/cameroon-tribune 1/1](https://www.cameroon-tribune.cm/article.html/4604/fr.html/cameroon-tribune%201/1)

# Universités de Buea et de Bamenda: la sécurité des campus assurée

Le communiqué de presse du MINESUP parvenu à notre Rédaction. Sous la Très haute autorité institutionnelle de Son Excellence Paul Biya, président de la République, chef de l’Etat, et la coordination opérationnelle de Monsieur le Premier ministre, chef du gouvernement, Monsieur Philemon Yang, le ministre de l’Enseignement supérieur, Chancelier des Ordres académiques, porte à la connaissance des enseignants, étudiants et personnels d’appui des universités de Bamenda et Buea, ainsi que des Instituts privés d’enseignement supérieur (IPES) des régions du Nord-Ouest et du Sud-Ouest que, conformément à ses missions régaliennes, l’Etat a pris des dispositions appropriées pour assurer la sécurité des campus, cités universitaires, divers lieux publics et quartiers concernés. Les gouverneurs des régions sus-visées, les Pro-Chancellors, et vice-Chancellors de ces universités n’ont ménagé aucun effort pour que la reprise des cours soit effective, dès le lundi 23 janvier 2017, dans la sérénité, la confiance mutuelle et la tranquillité. L’Etat a pris ses responsabilités : les parents, enseignants, étudiants et personnels d’appui n’ont rien à craindre. La paix, l’ordre et la sécurité prévalent dans les deux régions, comme sur l’ensemble du territoire, sous la haute impulsion de Son Excellence Monsieur le président de la République, chef de l’Etat, garant de la sécurité des biens et des personnes. Le ministre de l’Enseignement supérieur demande aux parents, enseignants, étudiants et personnels d’appui des institutions universitaires publiques et privées des régions du Nord-Ouest et du Sud-Ouest de faire prévaloir le Droit à l’éducation, inhérent à la Constitution, et de ne pas céder aux manœuvres répréhensibles qui relèvent de la guerre psychologique ourdie par une infime minorité de citoyens qui rêvent de prendre en otage le sous-système éducatif anglophone, pour des objectifs politiques anticonstitutionnels. Yaoundé, le 22 janvier 2017 Le ministre de l’Enseignement supérieur, By 23 Janv. 2017

[https://www.cameroon-tribune.cm/article.html/4686/en.html/universites-de-buea-de-bamenda-la-securite-campus-assuree 1/1](https://www.cameroon-tribune.cm/article.html/4686/en.html/universites-de-buea-de-bamenda-la-securite-campus-assuree%201/1)

# Nord-Ouest et Sud-Ouest: des documents de travail remis aux tribunaux

By 23 Janv. 2017

Une dizaine d’actes divers ont été distribués vendredi dernier par le ministre d’Etat Laurent Esso aux procureurs généraux de ces deux régions. Cérémonie brève mais pleine de signification vendredi dernier au cabinet du ministre d’Etat, ministre de la Justice, Garde des Sceaux. Entouré de quelques collaborateurs et de Jean Fils Ntamack, procureur général près la Cour d’appel du Centre, Laurent Esso a procédé à la remise d’une dizaine d’actes (versions anglaises) à Njie Albert Nganje, procureur général (PG) près la Cour d’appel du Nord-Ouest et à son collègue Emile Essombè du Sud-Ouest. Il a d’emblée tenu à les féliciter pour la manière dont ils tiennent les différentes juridictions de leur ressort pendant cette période agitée. « Je vous réitère mes félicitations pour votre loyalisme et pour votre loyauté. Je vous demande de veiller toujours à ce que, dans les régions du Nord-Ouest et du Sud-Ouest, et, malgré les turbulences du moment, le pouvoir judiciaire continue d’être respecté ; que le pouvoir judiciaire continue d’affirmer son indépendance vis-à-vis de toutes velléités politiques » a souligné Laurent Esso. Puis, le ministre d’Etat a relevé « la polémique stérile » qui a pris corps au sujet de la disponibilité des Actes uniformes OHADA en version anglaise. « Si les praticiens du droit embarqués dans cette manœuvre qui, en réalité, a d’autres objectifs, savaient qu’il existe au Cameroun un Journal officiel qui publie les dispositions législatives susceptibles d’être appliquées au Cameroun, on n’en serait pas là » a martelé Laurent Esso qui a, par ailleurs, fait savoir qu’il n’appartient pas au ministère de la Justice de procéder à la documentation des membres de certaines organismes professionnels. Aux deux PG, il a demandé de remettre à chacun des magistrats de leurs ressorts respectifs, « un jeu complet de cet outil de travail, pour leur permettre d’être à jour dans leurs documentations ». Outre le Traité et les Actes uniformes OHADA, dont il a rappelé qu’ils avaient déjà été respectivement publiés au Journal officiel du Cameroun en 1997 et 1999 en éditions spéciales, dans une traduction faite par son département ministériel, il a mis à leur disposition la version en anglais du Code pénal récemment promulgué par le président de la République. Occasion pour le Garde des Sceaux d’adresser ses félicitations à tous les magistrats anglophones ou francophones « qui font des efforts louables pour s’adapter à l’utilisation de la langue officielle dans le ressort de la Cour d’appel où ils travaillent ». Non sans souligner au passage que « le français et l’anglais sont deux officielles d’égale valeur au Cameroun. Il n’est donc ni illégitime, ni illégal d’utiliser l’une ou l’autre ». Toutefois, il a invité les magistrats concernés, et ce, pour des raisons pratiques « de veiller à ce que la langue officielle la plus utilisée dans vos ressorts respectifs soit également la langue de travail dans les juridictions, sans que cela soit un motif de rejet des uns par les autres ». Et de préciser : « La justice au Cameroun est rendue au nom du peuple camerounais, qui est UN, dans un Cameroun UN et indivisible ».

[https://www.cameroon-tribune.cm/article.html/4687/en.html/nord-ouest-sud-ouest-documents-de-travail-remis-aux-tribunaux 1/2](https://www.cameroon-tribune.cm/article.html/4687/en.html/nord-ouest-sud-ouest-documents-de-travail-remis-aux-tribunaux%201/2)

# Bamenda: Timid Resumption Of Classes

By Carine ELEME (Stagiaire 24 Janv. 2017

Security forces conspicuous to protect people and property in schools that featured teachers and students of the francophone subsystem of education. "A majority of teachers and administrative staff of especially public schools were present on January 23rd, 2017 and a few classes were effective in GBHS Ntamulung and GBHS Bamenda. There were some 60 students present." That is how the North West Regional Delegate for Secondary Education, Victor Mohbakwed sized up the situation in Bamenda yesterday Monday January 23. In effect, the teaching and learning process was not the best on the day scheduled for schools to effectively reopen for the 2nd term of the 2016 /2017 academic year in the North West Region. Most schools remained shut and uniforms were rare to find following the strike action called by Anglophone Teachers Trade Union since November 21, 2016. Forces of law and order were conspicuous to secure people and property in GBHS Bamendankwe and Ntamulung where a few teachers and students of the Francophone sub system of education featured but would not entertain questions from the press. It was same scenario at GBHS where students were fewer. The gates of PCHS Mankon and all denominational colleges, primary and nursery schools remained shut. The overall situation was not helped by the ghost town called on January 23rd and 24th 2017 in the cities of the region. The streets were empty, without taxis and commercial motor cycles. Shops were closed. Not even children within trekking distance to school turned out for studies in most parts of Bamenda. Parents blamed it on fear, following threats from unidentified youths to act against any parent who dares to send children to school.

[https://www.cameroon-tribune.cm/article.html/4738/en.html/bamenda-timid-resumption-of-classes 1/1](https://www.cameroon-tribune.cm/article.html/4738/en.html/bamenda-timid-resumption-of-classes%201/1)

# South West: School Resumption Spoiled

By Kimeng Hilton 24 Janv. 2017

Schools resumed timidly in the South West Region yesterday January 23, 2017 following the Ministerial Order of last week countering the ghost school syndrome that had kept pupils and students at home for close to two months. News from the various Divisions spoke of grounded activities especially the lack of taxis in the streets, closed stores and claims of fear of the unknown. In Ndian Divisional Headquarters of Mundemba, tract distributors were arrested by the forces of law and order in the early morning of yesterday. In Lebialem, reports talked of deserted schools though some teachers were present in the campuses. In Kumba, Meme Divisional capital, Mr. Fon Ndikum, the Secretary General at the South West Governor's office, toured the various schools accompanied by the Divisional Etat-major and met mainly the teachers. In the cases of bilingual institutions, francophone students were available for classes. The administration of the South West now has the task of following up some 398 Secondary, High and Teacher Training Institutions under the Ministry of Secondary Education to resume classes imperatively one of these days. For Basic Education, the task is even greater with 829 Nursery Schools and 350 Primary Schools, (private and public) in the limelight to resume studies. In Buea, Regional Capital of the South West, Governor Bernard Okalia Bilai spent the entire morning of yesterday visiting nine schools, (private and public), the Mile 17 bus station, the Molyko commercial center before settling in his office by noon to receive reports from the various Divisions. While on the field, the Regional boss observed with dismay that, school resumption was at snail pace. For example, at the Bilingual Grammar School Molyko, only 17 Anglophone students were on hand for classes meanwhile the francophone section was receiving lessons as usual, though in less numbers. At the Government Bilingual High School Muea, the scenario was the same. The various principals blamed the absence of students from campus on the ghost towns whereby students living in faraway places could not trek to school in the absence of taxis. At the Mile 17 gateway to Buea, Governor Okalia pulled a face at the council authorities who did little to get shops open at the bus station. The Governor finally instructed that such shops, banks and roadside businesses must be open by today.

[**https://www.cameroon-tribune.cm/article.html/4739/en.html/south-west-school-resumption-spoiled 1/1**](https://www.cameroon-tribune.cm/article.html/4739/en.html/south-west-school-resumption-spoiled%201/1)

# Buea: Students Keep Increasing in Numbers

By DIDDI Aissatou 26 Janv. 2017

The Divisional Officer and Mayor for Buea made an inspection outing yesterday to ascertain business resumption in the Regional headquarters. Deputy Mayor Mossoko later confirmed that the Buea Town market where the Divisional Officer, Wokam Paul and Mayor Ekema Patrick threatened to seal shops that were locked, was about half opened by mid day yesterday. The Mayor has promised to visit other commercial centres like Mile 17 and the Clerks quarters today with the same action. Although still timid, a few more pupils and students were seen in some campuses of Buea city yesterday. In the campus of the Bilingual Grammar School Molyko, Buea Town and Bokwaongo, dozens of pupils and students were seen playing in the school yards, many of them in assorted clothes. They were approached and they confirmed they were students. The schools were urged by Governor Bernard Okalia Bilai, the previous day, to entertain classes even if it is one student and so was the case yesterday 25 january 2017 in some of the schools where pupils and students turned out. The Governor has urged civil servants to take their children to school to show the good example. The Buea Council authorities have promised to make another round of Buea today to inspect the reopening of businesses especially at Mile 17 Bus Station where the Council has hired out stalls for businesses, many of them on Build Operate and Transfer basis (BOT). Many of these rooms had remained closed last Monday following the strike action. But the Council on Tuesday insisted that if they would not open, then, they may be forced out of the premises for those who wish to function to occupy them. [https://www.cameroon-tribune.cm/article.html/4831/en.html/buea-students-keep-increasing-in-numbers 1/1](https://www.cameroon-tribune.cm/article.html/4831/en.html/buea-students-keep-increasing-in-numbers%201/1)

# Bamenda: Cost Of Keeping children Home

By Erick Maville, Directeur Général De L’association Santé En Entreprise (SEE) 26 Janv. 2017

Parents suffer the extra burden of having children of school going age away from school. From the look of things, pupils and students who have not resumed school since the teacher's trade union strike was called are the uninvited guests in many homes in Bamenda and neighbourhoods. On the streets and on the corridors of many homes, it is on most lips that such school children have become an extra burden. Parents are counting the cost with alot to show in inconveniences and extra efforts to keep them at home away from their natural academic environment. Cynthia Ngang, in the neighbourhood of Nkwen is at a loss on what to do with her 15-year-old son J. John, a student of a boarding school in Bamenda. In the absence of academic activities, she finds it difficult holding John back at home without any comprehensive insurance coverage for security in the neighbourhoods. That is the same story for many children who go on playing football on ghost streets and makeshift playgrounds till late. Away from that Martin Achidi told CT that the bill for their electricity consumption has virtually tripled two months after his three children retired from boarding schools. It is not better with more mouths consuming food and water which was spared while the children were away in school. Some parents regret that the tuition fee already paid in school may never be retrieved without any teaching and learning for it. It is a difficult time for parents. Some of whose children are in end-of-course examination classes. The noisy home environment doesn't help attempts to stay focused. Other neighbourhood distractions do not help matters. In effect two months without academic activities is threatening to turn the attention of some children who need the special care of teachers and a studious environment. That apart, more disciplined child is a joy to watch them around. They regret the blackout on academic activities imposed on them but stand by their parents. Many are busy handling house chores. Others assist the business ventures of parents and some accompany their parents in regular farming activities. [https://www.cameroon-tribune.cm/article.html/4830/en.html/bamenda-cost-of-keeping-children-home 1/1](https://www.cameroon-tribune.cm/article.html/4830/en.html/bamenda-cost-of-keeping-children-home%201/1)

# Bamenda: Still Timid Increase In School Turnout

“ By Carine ELEME (Stagiaire 27 Janv. 2017

Fear continues to dominate English subsystem as fewer students are present in classrooms. Taxis and commercial motorcycles returned to the streets of Bamenda since Wednesday, January 25, 2017 after two days, Monday and Tuesday that witnessed another stressful ghost town experience. Life gradually returned to the city and neighbourhoods that spent January 23rd and 24th with markets and shops shut. Inter-urban transport vehicles once more hit the roads while snack bars, off licences and liquor houses resumed business activities. The situation did not however encourage the resumption of schools for the English subsystem of education in virtually all the schools. The difference continues to be in GBHS Bamendankwe in the neighbourhood of Up-station where timid academic activities took place in the francophone subsystem. On the spot in campus, is the presence of security forces to protect students and property. Activities on Wednesday, January 25, featured an improvement on the number of students and teachers on campus. Some 279 students were present up from 242, twenty four hours earlier on January 24. Also available for service were some nine administrative staff and about 14 teachers. But barely 37 students of the English subsystem, up from 18 the previous day were present. It emerged from the administration of GBHS Bamendankwe that fear is to be blamed for the absence of students of the English subsystem, one of whose student was assaulted and her books thrown in water on her way to school on January 25. Elsewhere, in GBHS Bayelle, Bamenda, reports featured eight out of 40 teachers present for barely three students of the English subsystem and some 10 out of 12 teachers for about 76 students of the francophone subsystem. It was not better in GTHS Bamenda, GBHS Atiela etc. It was against this backdrop that the Governor of the North West Region, Adolphe Lele Lafrique went sizing up the situation in the schools on January 24. He took time off to visit students in class and encourage reluctant students and teachers to resume school with assurance that security measures have been put in place for effective classes. Adolphe Lele Lafrique: « Relative Calm Reigns in North West Region » Governor of the North West Region “Relative calm reigns in our region and it’s inhabitants are quietly and peacefully going about their daily activities. Some schools effectively resumed on Monday January 23, 2017 though timidly. I personally visited some schools the day after to witness the progressive return to normal of activities within the education sector in our region. I therefore want to use this opportunity to call on all the others who are still at home to join their friends attend their classes and not be afraid because, once more, I reiterate that security measures have been put in place throughout the region to ensure their personal security and prevent any disruption of puiblic peace. [https://www.cameroon-tribune.cm/article.html/4895/en.html/bamenda-still-timid-increase-in-school-turnout- 1/1](https://www.cameroon-tribune.cm/article.html/4895/en.html/bamenda-still-timid-increase-in-school-turnout-%201/1)

# 1/9/23, 1:19 AM Multiculturalisme: une opportunité à saisir

By Alfred Mvogo 27 Janv. 2017

La diversité du Cameroun est saisissante. En guise d’illustration, prenons l’aspect socio-culturel : deux langues officielles, l’anglais et le français, héritées de la double colonisation britannique et française ; environ 250 ethnies ; 236 langues dénombrées par les linguistes camerounais parmi lesquelles une centaine standardisables ; plusieurs langues véhiculaires à l’échelle locale ou régionale, par exemple le pidgin ; une mosaïque de peuples organisés en communautés différentes, selon qu’ils se trouvent dans les zones forestières, dans les grassfields ou dans les zones de savane ; des dizaines de confessions religieuses officiellement reconnues cohabitent dans la tolérance. Cette diversité a généré une multitude d’expressions de cultures nationales, une variété de traditions. Elle est l’une des caractéristiques de l’identité du Cameroun. Le mot multiculturalisme exprime et résume cette diversité culturelle, une des richesses de notre pays. L’importance de la mise en valeur de cette richesse, sur tous les plans (patrimonial, économique, touristique, culturel…) n’échappe ni aux communautés nationales qui la traduisent de diverses manières lors de leurs manifestations culturelles à l’instar du Ngondo, du Nguon, de la fête du coq ou du festival Bikut-si, ni aux pouvoirs publics. Au demeurant, le président Paul Biya exprimait déjà cette vision dans son essai politique intitulé « Pour le libéralisme communautaire » publié en 1987. Dans cette perspective, le décret présidentiel portant création, organisation et fonctionnement de la commission nationale pour la promotion du bilinguisme et du multiculturalisme est à la fois un cadre propice et une opportunité idoine pour les cultures, les langues et les traditions de notre terroir. Malgré des initiatives parcellaires, il n’est un secret pour personne, comme l’a révélé la Société internationale de linguistique (SIL), que beaucoup de langues maternelles et de nombreuses traditions se perdent au fil des générations. Il y a lieu de relever tout de suite que la création de la Commission nationale pour la promotion du bilinguisme et du multiculturalisme ne phagocyte, ni n’étouffe les attributions respectives dévolues aux autres institutions qui exercent des compétences dans ces domaines, à l’instar de certains départements ministériels comme la Culture, l’Enseignement supérieur ou la Recherche. Organe consultatif, elle apparait comme un atout supplémentaire et un cadre spécifique conceptuel et pratique pour mettre davantage d’accent sur les cultures et les traditions camerounaises. Elle vient renforcer l’existant. Au-delà des missions d’études, de projets, de promotion, de sensibilisation et de vulgarisation relatives notamment au multiculturalisme, elle est chargée « de recevoir toute requête dénonçant des discriminations fondées sur l’irrespect des dispositions constitutionnelles relatives au bilinguisme et au multiculturalisme et en rendre compte au président de la République ». Elle peut donc être saisie par toute personnalité physique ou morale. L’exercice de cette attribution donnera, le cas échéant, l’occasion de mettre en exergue toutes sortes de discriminations ou d’intolérances culturelles en vue de les corriger pour un brassage harmonieux des peuples de notre pays. L’avènement de la Commission nationale pour la promotion du bilinguisme et du multiculturalisme suscite ainsi beaucoup d’espoirs voire d’ores et déjà des attentes. L’espoir que rien ne sera négligé pour la valorisation de nos cultures dans toutes leurs formes d’expression, de la cuisine à la sculpture, en passant par les diverses traditions, sans négliger les langues maternelles. Les attentes sont tout aussi nombreuses et variées, s’agissant d’une œuvre aux dimensions plurielles. La plus importante est de veiller en permanence à transformer le multiculturalisme en un levier pour la bonne connaissance et appréciation des cultures camerounaises par les Camerounais eux-mêmes et partant consolider la culture de tolérance et du vivre-ensemble harmonieux.

[https://www.cameroon-tribune.cm/article.html/4890/en.html/multiculturalisme-une-opportunite 1/2](https://www.cameroon-tribune.cm/article.html/4890/en.html/multiculturalisme-une-opportunite%201/2)

# Normal Weekend Life Back In Buea By ETOUNDI 30 Janv. 2017

Activities have returned to normal in Buea after the two days of ghost town early last week. Taxis are back on the streets and businesses are open once more Some students, mostly Francophones, attend school regularly unperturbed. The only irk is the absence of internet which has slowed down business in the South west regional capital. On Saturday night, there was effervescence in the streets of Buea after the Lions victory over Senegal in the quarter finals of the ongoing Africa Cup of Nations in Gabon. People shouted excitedly while some vehicles blasted their horns in sign of jubilation. However, it is not known for how long this good mood will prevail as there are rumours the ghost town strike action will continue today and tomorrow. In preparation to counter the strike action, the Mayor of Buea has bought a consignment of taxis to do transportation in case taxi drivers adhere to the boycott of activities. Last week the Mayor, Ekema Patrick went round closing businesses that refused to open and is promising to continue sealing stores. The presence of security forces dressed in anti riot outfit, serve as a reminder that the situation can degenerate at anytime. Most schools still remain closed though teachers turn up, the students fail to show up for classes. Meanwhile, some traditional rulers have been multiplying efforts for schools to resume carrying out a door to door campaign.

[https://www.cameroon-tribune.cm/article.html/4945/en.html/normal-weekend-life-back-in-buea 1/1](https://www.cameroon-tribune.cm/article.html/4945/en.html/normal-weekend-life-back-in-buea%201/1)

# South West Region: Governor Visits Mutengene, Limbe Schools By Richard Kometa 31 Janv. 2017

Private and State-owned schools received the impromptu call of the chief executive of the Region. As the South West Region awoke to ghost schools and cities again yesterday, Governor Bernard Okalia Bilai decided to pay impromptu visits to some six Secondary and High schools in Mutengene and Limbe. For four hours, Okalia Bilai moved from GBHS Mutengene to the “Groupe Scolaire Ngula Lottin" passing through GHS, GBHS, “Espoir School Complex”, and the ”Ecole SONARA”, all in Limbe. At the GBHS Mutengene, the Governor frowned at the absence of students urging the Principal to ask teachers to bring their own children to school. He advised the Principal to call Parent-Teacher meetings and educate them to send children to school because as he explained it is the future of children that is being jeopardised. The Principal, Mokoko Hannah, related incidences that had occurred in the school last 28 November whereby vandals invaded the school and caused stampede leading to students fleeing back home. She said the situation was repeated in December and since then children have been scared to come to school. The Governor urged the school administration to immediately report such incidence to the Police or Gendarmes whose offices are quite near the school for protection. At GHS Limbe, the Governor observed total absence of students and told the Principal to seek advice from other schools that have been receiving however a small number of students. In all the schools visited by the Chief Executive, teachers were present. The Governor urged for the keeping of good attendance records to be preserved as he said, “There will be a tomorrow of this situation”. In the meantime, the Francophone sections of Bilingual schools as well as purely Francophone schools are functioning. The Governor rounded off his tour of schools reminding parents that exams are coming unfailingly and that politicians should not confuse children to abandon their studies. Meanwhile, the Governor is multiplying contacts with religious leaders to seek a lasting solution to the ghost schools. In the early morning of yesterday, a dozen of taxis were seen plying Buea streets many of them without number plates. Some bikes began to carry passengers up and down the mountainous city of Buea and helping workers to get to their offices. On the days when strike promoters have set out for the ghost town, for example Mondays and Tuesdays, school attendance drops to the lowest ebb but regains a bit of momentum when economic and social activities resume on Wednesdays. Reaction Bernard Okalia Bilai: “Children’s Future Must Not Be Jeopardised” South West Governor. “Principals of schools should call PTA meetings to educate parents. Also, teachers should bring their children to school to set the example of good conduct. It seems that some teachers are leaving their homes and telling the children to stay there so they go and mark their names. The future of innocent children must not be jeopardised. There will be a tomorrow of this situation and the children will ask their parents why they did this to them”

[https://www.cameroon-tribune.cm/article.html/5008/en.html/south-west-region-governor-visits-mutengene-limbe-schools 1/2](https://www.cameroon-tribune.cm/article.html/5008/en.html/south-west-region-governor-visits-mutengene-limbe-schools%201/2)

# Bamenda: Population Urged To Ignore Ghost Towns

By Erick Maville, Directeur Général De L’association Santé En Entreprise (SEE) 31 Janv. 2017

Mezam Senior Divisional Officer inspires business community to ignore ghost town Inhabitants of Bamenda and its neighbourhoods woke up to another ghost town experience on Monday, January 30, 2017 with shops and markets shut, taxis and commercial motorcycles were off the streets. A few courageous commercial bikes riders that ignored the ghost town were quick to retire into the quarters following reports of threats and assaults on their colleagues in some parts of the city. The day was similar to previous ghost town days with most inhabitants remaining indoors while others trekked to respect appointments. Inhabitants appear at a loss how soon the ghost town calls will be history. Fear continues to dominate the population despite regular guarantee by the administration that the forces of law and order are around to ensure the security of people and property. Mezam Senior Divisional Officer (SDO), Pierre Rene Songa over the weekend encouraged the population to ignore the ghost town and give their business activities a chance. At a meeting with traders, commercial motorcycles riders, taxi men, managers of financial institutions and other stakeholders , the SDO said the government cannot abandon the population to itself. Meanwhile; January 30, 2017 was another day without teaching and learning for the English subsystem of education. While the student population of the French subsystem of education increases by the day, English subsystem students continue to remain at home. In effect, the week started with more students and teachers for the French subsystem in GBHS Bamendankwe, GBHS Ntamulung, while the gates of lay private and denominational schools and colleges remained shut. [https://www.cameroon-tribune.cm/article.html/5009/en.html/bamenda-population-urged-ignore-ghost-towns 1/1](https://www.cameroon-tribune.cm/article.html/5009/en.html/bamenda-population-urged-ignore-ghost-towns%201/1)

# Bamenda : Progressive Shift For School Resumption

By Monica NKODO 01 Févr. 2017

A total of 2,432 students of the francophone subsystem have received 197 lessons from 1,141 teachers so far in the region. Records about the resumption of schools in the North West Regional Delegation of Secondary Education indicate that out of the 11,533 students expected in some 222 secondary schools, 2,432 are receiving lessons as at January 30, 2017.The Regional Delegate Mombakwed Victor told CT that a majority belong to the francophone subsystem with 197 lessons so far received from 1,411 teachers out of 2,937 expected. Daily control sheets at the Regional Delegation reveal a positive trend for students in the English subsystem with 149 present for classes at GBHS Downtown Bamenda and 38 at GBHS Bayelle on Tuesday January 31. Elsewhere; Mombakwed Victor said some colleges in the Elak- Oku area, Kumbo, Ndop, Babungo etc feature quite a number of students . Mombakwed Victor: “ Students Are Increasingly Attending Classes” The Regional Delegate for Secondary Education North West sized up level of resumption on January. Could you size up the situation since the resumption of schools for the second term? "The shift towards a positive direction is very clear. We did not have up to 200 students in schools as at the end of last week in the region. But as at January 31, 2017 we have above 1, 000 students receiving lessons. This is indicative that parents and even students are beginning to realize the need to be in school. Maybe I should add that from the sample survey we have, teachers are more present than students in all schools. Is there any English subsystem school that has fully resumed? There is none but we have students increasingly attending classes though the affluence is not yet there How do you explain the reluctance? I cannot say with precision what the problem is but the trend of discussion on the streets indicates that teachers, parents and students still expect the government to take actions to satisfy the concerns raised by the actors of the English subsystem. But since the government is slowly taking actions, they too are slow to send children to school. That apart, teachers are very much present in schools but I received complaints from them about threats from unknown persons. The ghost town has not also been helping. How do you foresee the weeks ahead? I am very optimistic that it will soon be better for the English subsystem and the betterment of education in Cameroon because the concerns of protesting teachers are for the betterment of education for all. I hope the strike action will soon be over and give way for enthusiasm on the part of students and teachers to meet up with what they have lost.

[https://www.cameroon-tribune.cm/article.html/5053/en.html/bamenda-progressive-shift-for-school 1/1](https://www.cameroon-tribune.cm/article.html/5053/en.html/bamenda-progressive-shift-for-school%201/1)

# Commercial Bike Riders Defy Ghost Town By Carine ELEME (Stagiaire 02 Févr. 2017

There were more bikes and private cars on the streets on day two of ghost town, Tuesday January, 31, 2017 Day two of the ghost town on Tuesday January 31, 2017 featured a major development with more commercial motorcycles on the streets of Bamenda. Some courageous commercial motorcycle riders decided to defy the ghost town as they criss-crossed the streets charging more than the normal FCFA 200 per drop. They were conspicuous around Finance Junction, Mobile Nkwen and Commercial Avenue. Equally visible on the streets were few clandestine vehicles transporting passengers from Finance Junction towards Mbouda, Bafoussam and Dschang in the West Region. Bamenda markets however remained closed while some traders could be seen idling around their closed shops in town. Some appeared ready to sneak and serve customers. Closed door business was evident in some on and off licences in attempts to serve customers who were thirsty for a drink. Fuel tankers made their way into town to refuel filling stations. It was a less stressful ghost town day but the gates of English subsystem education schools remained closed while private cars circulated freely. In effect, security forces were visible at major junctions and strategic corners to inspire confidence in those poised to do business. [https://www.cameroon-tribune.cm/article.html/5089/en.html/commercial-bike-riders-defy-ghost-town- 1/1](https://www.cameroon-tribune.cm/article.html/5089/en.html/commercial-bike-riders-defy-ghost-town-%201/1)

# Nord-Ouest, Sud-Ouest: Jean-Jacques Ekindi contre les derives

By KETCHATENG 01 Févr. 2017

Appel lancé ce 31 janvier lors de la présentation des vœux au coordonnateur du Mouvement progressiste à Douala. Jean-Jacques Ekindi, le coordonateur général du Mouvement progressiste (MP), souhaite que l’école reprenne normalement dans le Nord-Ouest et le Sud-Ouest « dans les plus brefs délais. » L’appel a été lancé ce 31 janvier 2017 à Douala, à l’occasion de la présentation des vœux par les cadres de cette formation politique à leur leader. Le parti estime, par la voix de son dirigeant, que la situation doit pouvoir se régler par le dialogue, un « dialogue républicain » pour la réussite duquel chacun doit mettre du sien. Ce que le parti espère ? Des échanges sur le problème actuel organisés dans un « débat fraternel, ouvert, inclusif dans le cadre des institutions de la République. » « Parce que nous savons que la paix et la concorde sont des biens inestimables, parce que nous savons que les mouvements sociaux prennent toujours des formes singulières dont personne n’est maître (…) nous avons l’impérieux devoir de préserver le Cameroun et les Camerounais de toute dérive », ajoutera le leader du MP, en présence de présidents de fédérations du parti, des militants et des sympathisants. Sur un tout autre plan, Jean-Jacques Ekindi a annoncé, pour 2017, l’organisation de la convention ordinaire du parti. « Après bien des vicissitudes, cette année, nous allons tenir la convention ordinaire de notre parti, le Mouvement progressiste. Que chacun s’y prépare », a-t-il déclaré. Répondant un peu plus tard à une question de la presse portant sur la date éventuelle de l’événement, Jean-Jacques Ekindi a indiqué qu’elle n’était pas encore formellement arrêtée, situant néanmoins cette convention vers la fin de l’année.

[https://www.cameroon-tribune.cm/article.html/5093/en.html/nord-ouest-sud-ouest-jean-jacques-ekindi-contre-les-derives 1/1](https://www.cameroon-tribune.cm/article.html/5093/en.html/nord-ouest-sud-ouest-jean-jacques-ekindi-contre-les-derives%201/1)

# Give Dialogue A Chance, Governor Lafrique Appeals

By Erick Maville, Directeur Général De L’association Santé En Entreprise (SEE) 23 Nov. 2016

We were taken aback on November 21, 2016 by some disorder in Bamenda. We were however, quick to take necessary security measures to prevent any major destructions. Unfortunately, the situation later degenerated when some vandals who gathered at City Chemist Roundabout marched towards the Bamenda City Council. We were obliged to secure the premises of the City Council after the Vandals moved to some major streets of the City where they mounted barricades and even harassed some of our security services. It is good enough that no major casualties were registered. Nobody died though a security Guard was shot in Tubah Sub Division and evacuated to Mbingo Baptist hospital for treatment. It is against this background that we immediately took special security measures to keep the City and the University of Bamenda safe. The situation has progressively returned to normal since Tuesday morning. Among other actions taken, I presided a meeting on Monday, enlarged to involve stakeholder trade Unions that called the teachers strike action. The meeting also involved Religious authorities, especially the Archbishop of Bamenda and the Moderator of the PCC. I registered their concerns to forward to the government. After the meeting, all of us were on the field to size up the situation and took time off to talk to the youths who were mounting barricades. Again, I invite the population to collectively join in bringing lasting peace to Bamenda. Cameron is a State of Law and while we have taken special measures to keep the City secure, I want to assure all that we will not allow disorder to reign. There is a need for all to give dialogue a chance. [https://www.cameroon-tribune.cm/article.html/2854/en.html/give-dialogue-chance-governor-lafrique-appeals 1/1](https://www.cameroon-tribune.cm/article.html/2854/en.html/give-dialogue-chance-governor-lafrique-appeals%201/1)

# Situation in Bamenda: Leave Cameroon Alone!

By LIENGU ETAKA ESONG 25 Nov. 2016

Cameroonians do not seem to have read, at least appropriately, about the victories of the 1961 Foumban conference and the ensuing conclusions that led to the reunion between the two erstwhile territories initially ceded to France and England following the defeat of Germany in the First World War . The way we have made of the conclusions of that conference are a reflection of what has been happening on the streets of Bamenda in the past few days. Many Cameroonians today on the both sides of the perceived divide, earnestly believe that people in a glass house should avoid throwing stones! Simply because they believe stones can break what has painstakingly taken a good 55 years to build! There is a lot of passion around; and in an atmosphere of passion nothing really good can emerge except in a situation where one camp wants to win at all cost. The passion being referred to here is about the massive destruction of public infrastructure in Bamenda which will certainly take many years to rebuild. This came about mainly because of the ambient poverty which is not an exclusive problem of the Bamenda municipality but rather a national problem which the government is trying in more ways than one to address with results which, for obvious reasons, cannot satisfy the wide-ranging demands of a wild army of job seekers. The situation therefore calls for patience just as it is also necessary to patiently hear the demands being made by striking teachers and lawyers and for which the Governor of the North-West Region has promised a responsible response in his desire that dialogue should be given a chance! This means the “warring” factions have finally come to terms and one expects that in the coming days the dialogue promised by the Governor and which, in the first place, can be blamed for the prevalent situation, can produce results that are satisfactory to all the parties. No one is preaching secession as has been suggested by some people who are obviously oblivious of the gains of the 1961 constitutional conference in Foumban whose conclusions were extremely bullish about a future Cameroonian nation in which all the reunited components lived in absolute harmony. When this trouble in Bamenda started, it was hard to believe under what auspices the Foumban Constitutional Conference held. Has the slogan “How nice It is to be together Again” carried on a huge billboard on the entrance to Foumban been thrown to the dogs? Time and history will have to judge the real intentions of the negotiators of the Foumban conference, but the suggestion attributed to some indigenes of the former British territory of Southern Cameroons is obviously considered an insult to the vast majority of Cameroonian citizens of this part of the national territory who need not be reminded each time, as has often been the case, that they are citizens of a reunited Cameroon. Moreover, the 1961 translated version of the national anthem of Cameroon is unequivocal in its belief that Cameroon is one. It suggests in imagery that Cameroon is a huge mass as mighty as the Buea Mountain. These are some of the suggestions that those animating the social media are unaware of. Cameroonians simply want to be considered as full-fledged citizens, ensuring that no one is considered in any way possible as a secondclass citizen or as one not enjoying the full rights as conceived by our grandparents, uncles or aunts in Foumban. Social media actors should leave Cameroon alone; because we can address our problems alone and simply need leaders who are in a disposition to listen to others because this is what a Republic is all about. Those talking about secession and the like are obviously prophets of doom or simply those wanting undeserved political gains. Maybe many Cameroonians simply want an improvement in their lot but lack the appropriate way to express their desire; but hawks of the system want to give them a bad name and consequently hang them. Let us do everything to save Cameroon!

[https://www.cameroon-tribune.cm/article.html/2936/en.html/situation-in-bamenda-leave-cameroon-alone- 1/2](https://www.cameroon-tribune.cm/article.html/2936/en.html/situation-in-bamenda-leave-cameroon-alone-%201/2)

# North West: PM Yang Consults, Listens

By Erick Maville, Directeur Général De L’association Santé En Entreprise (SEE) 28 Nov. 2016

Teacher Trade Unions and the government set agenda towards suspension of strike action. It was a busy weekend for the Prime Minister, Head of Government, Philemon Yang who spent long hours on November 2016 25 and 26, 2016 consulting and encouraging North Westerners on the way forward for nation building without frustrations. Coming on the heels of some disorder on the streets, lawyers and teachers strike actions that rock the capital of the North West region, the consultations, on-the-spot in Bamenda were inclusive and in camera. From the look of things, it is all about the commitment of the government to give a listening ear and dialogue in the process of putting the blocks together for nation building. On the very topical teacher trade unions strike action, some union leaders told Cameroon tribune that an eight point agenda was adopted to chart the way towards the suspension of the strike on or before November 30, 2016. It requires the implementation of at least one of the requests, featuring among others the creation of a new institutional framework to look into problems raised by teachers. In effect, the Prime Minister, flanked by North West Governor, Adolphe Lele Lafrique and the Prime Minister’s Directors of Cabinet, Prof. Paul Ghogomu spent long hours listening to separate delegations of Teacher Trade Unions, Common Law Lawyers, Clergy, North West Fons, politicians, civil society etc. Spotted entering or leaving the consultation premises included Common Law Lawyer leads, Barristers Harmony Bobga and Felix Agbor Bala, teacher trade union leaders, Wilfred Tassang, Tameh Valentine, Afuh Stephen, North West CPDM elite, Senator Regina Mundi, Hon. Njingoum Musa, Alhadji Baba Ahmadou Danpullo, Ntumfor Fru Jonathan, SDF National Chairman, Ni John Fru Ndi, UDP Chairman, El Hadj Lawan Bako, CPP’s Dr Tita Fon, Archbishop Cornelius Fontem Esua, CBC Executive President, Rev Ncham Godwill, the Vice Chancellor, University of Bamenda, Civil society leaders, journalists and some commercial motorcycle riders. Curtains dropped on the consultations with virtually all saluting the Prime Minister, Head of Government, Philemon Yang for showing respect by reaching out to citizens of the North West region for discussions on issues that threaten the nation. [https://www.cameroon-tribune.cm/article.html/3031/en.html/north-west-pm-yang-consults-listens 1/1](https://www.cameroon-tribune.cm/article.html/3031/en.html/north-west-pm-yang-consults-listens%201/1)

# North West Elite Open Up

By Erick Maville, Directeur Général De L’association Santé En Entreprise (SEE) 28 Nov. 2016

“Channels of Dialogue Have Opened” Barrister Harmony Bobga, Common Law Lawyers leader. “The channels for dialogue have opened after we met the Prime Minister, Head of Government in Bamenda. Nothing concrete emerged from the consultations beyond the opening of a window of opportunities for dialogue to prevail. It is on this account that the Common Law Lawyers strike action continues while we have been directed to open up to an enlarged meeting with the Minister of State, Minister of Justice. We will be signing a Memo with the Prime Minister to include a request for the meeting with the Minister of Justice. We hope that the government will have the same open mindedness as we have. One thing which stands out is that the word federalism which we analyze as a means of having a sustainable solution to the problems we have raised is taboo to the government and we have been invited to be tolerant and we also insist that it should be a two-way traffic. Evidently, the meeting with the Prime Minister is a good beginning. He was frank and the discussions were open”. “Issues Raised Will be Handled Progressively” Afuh Stephen, PEATTU Teachers Trade Union leader. “Teacher Trade Union leaders in Bamenda used the opportunity offered by the Prime Minister to articulate reasons why we did not honour the invitation by the Minister of Higher Education in Yaounde. We respect him as the Prime Minister, Head of Government and took his word for serious given that he personally came to dialogue with teachers. The issues we raised were not easy to reach a consensus on day one and it was only after stalemates and suspensions of talks to re-strategize that we finally reached an agreement with the P.M, to the effect that issues raised will be handled progressively within a time frame to be decided by a new institutional framework to be created by the government. So the strike will only be suspended when at least one of the resolutions adopted is implemented on or before 30 November 2016” “Give a Listening Ear to Problems” -Ni john Fru Ndi, SDF National Chairman. “Meeting with the Prime Minister, I took up the cry of the people, especially the children who took upon themselves to erect barricades in Bamenda because they felt that their town was dirty and roads were bad. I also spoke about the problems of striking teachers and lawyers but I could not speak with authority because I am a mere leader and they were available to talk for themselves about the technicalities of their professions. That is why I asked the Prime Minister to give a listening ear to issues that are dangerous to our society. I feel sorry for those who claim that Anglophones have no problem in Cameroon”. “Consultations Inspire Lots of Hope” HRH Fon Abumbi of Bafut “I insisted on the importance of dialogue when I met the Prime Minister and I left him more comfortable than before. The Prime Minister appeared very serious and committed to solve the problems of teachers and lawyers. He invited us, traditional rulers to collaborate with the government for dialogue to bear fruits”.

[https://www.cameroon-tribune.cm/article.html/3034/en.html/north-west-elite-open-up 1/2](https://www.cameroon-tribune.cm/article.html/3034/en.html/north-west-elite-open-up%201/2)

# Calm Returns To Bamenda

By Erick Maville, Directeur Général De L’association Santé En Entreprise (SEE) 28 Nov. 2016

After a fruitful exchange with various opinion leaders in Bamenda, the Prime Minister’s presence left behind a peaceful town. The inhabitants of the North West Regional capital, Bamenda woke up to a peaceful day yesterday Sunday, 27 November 2016. This follows two days of intense discussions between Prime Minister Philemon Yang and opinion leaders such as traditional rulers, leaders of lawyers and teachers’ trade unions that have been at the forefront of a sit-in action which almost went out of hand. Churches in town functioned normally as Christians worshipped without any hindrance. Those who wanted to carry out purchases of certain basic necessities in town were able to do so without any problems. The dissuasive presence of security men deployed at strategic places in town had no negative effects on the population in the likes of what was observed days earlier when the upheavals started. Spearheading the consultations in Bamenda on Friday 25 November, Prime Ministers Yang gave room for all opinion leaders having any axe to grind as concerns the English educational sub-system and the questions raised by Common Law lawyers to express themselves. The issues had degenerated and made some disgruntled youth to go protesting in the streets in Bamenda with demands of all sorts and disrupting the normal flow of businesses and other activities in town. Consequently, Prime Minister Yang’s presence in Bamenda to examine the issues and listen to the people came like a balm on the wounds and many expressed the wish to see such dialogue continue for the population to go about life in Bamenda freely. While waiting for any further follow-up to the discussions, the people moved about yesterday without any disturbance and the day was therefore business as usual in the North West Regional capital. The situation about the resumption of classes in schools that were affected by the strike action will be clearer as from today November 28, 2016, with the start of another working week.

[https://www.cameroon-tribune.cm/article.html/3001/en.html/calm-returns-bamenda 1/1](https://www.cameroon-tribune.cm/article.html/3001/en.html/calm-returns-bamenda%201/1)

# Ceux qui parlent de la marginalisation des anglophones au Cameroun sont intellectuellement malhonnêtes November 28

Depuis un certain temps, le débat regrettable entre anglophones et francophones a refait surface au Cameroun. Ce débat étrange n’a pour but que de distraire les Camerounais des vraies préoccupations du gouvernement de l’heure que sont : l’éducation, la santé, les logements sociaux, les infrastructures routières et les opportunités d’emplois pour tous. Ce faux débat est entretenu par un groupuscule d’avocats et certains enseignants visiblement égarés et manipulés par les forces du mal rétrogrades, de l’intérieur et de l’extérieur, dont quelques-uns ont reçu d’importants financements de l’étranger pour mener cette entreprise de déstabilisation, vouée à l’échec. Le Cameroun est un Etat souverain, libre et démocratique. Le Président Paul BIYA, Homme d’Etat de dimension internationale, visionnaire hors-pair avait clairement dit en 1983 que personne n’a plus besoin de prendre le chemin du maquis pour exprimer ses opinions. Dès 1982 et de manière progressive, le Chef de l’Etat voulait un Cameroun libre où chacun peut s’exprimer sans crainte. C’est dans cette perspective que S.E. Paul Biya a abrogé toutes les lois d’exception en 1991. Personne ne peut aujourd’hui contester les avancées du gouvernement lorsqu’il s’agit de promouvoir les libertés individuelles et collectives. Les médias peuvent en témoigner. Il faut surtout en faire bon usage. SUR LES REVENDICATIONS DES AVOCATS ET ENSEIGNANTS Les Avocats ont commencé en disant que les textes OHADA n’existent qu’en français et qu’ils ont des difficultés de s’en servir pour la défense de leurs clients. Plus tard, les Avocats regroupés au sein des associations illégales dénommées ‘‘Meme Lawyers Association et North West Lawyers Association’’ ont évolué dans leur revendication, en disant que les magistrats du siège qui n’ont pas étudié le Common Law, ne devraient pas être affectés dans les tribunaux des régions du Nord-Ouest et du Sud-Ouest. Ces avocats ont commencé par les revendications corporatistes et soutiennent aujourd’hui les revendications politiciennes tout à fait irréalistes. Sur les ondes de Radio France Internationale Journal Afrique Matin 7h30, Maître BOBGA a clairement dit que tant qu’il n’y aura pas le retour au fédéralisme de 1961 réclamé par les anglophones, leurs doléances ne trouveraient pas de solution. Et sans solution, les avocats vont continuer à grever et ils passeront à la vitesse supérieure. S’agissant des associations des enseignants des CATU et TAG, certains disent qu’il y aurait beaucoup d’enseignants francophones affectés dans les Régions du Nord-Ouest et Sud-Ouest. Selon eux, c’est une situation qui poserait des problèmes à l’avenir. C’est donc sur la base de ces revendications qu’une manifestation illégale a été organisée lundi 21 Novembre 2016 à Bamenda. Les choses ont dégénéré en actes de vandalisme et de pillage ; heureusement vite neutralisés grâce au professionnalisme de nos vaillantes forces de défense et de sécurité. Face à ces comportements irresponsables et en ma qualité de Membre du gouvernement, Elite de la Région du Nord-Ouest et Délégué Permanent du RDPC pour le Département de la MEZAM, nous tenons à faire quelques mises au point avec les faits historiques, vérifiables et qui ne souffrent d’aucune contestation. D’abord, personne n’a mandaté ces groupuscules d’avocats et d’enseignants à parler au nom des Anglophones des régions du Nord-Ouest et du Sud-Ouest et ceux qui le font sont des imposteurs en quête de notoriété. Le Cameroun est un pays Uni et indivisible. Les Elites de la Région du Nord-Ouest et du Sud-Ouest ne permettront à quiconque de remettre en cause l’Unité Nationale si chèrement acquise. Aucun écart de comportement visant à remettre en cause l’unité nationale ne sera toléré. Force restera à la loi. Son Excellence Paul BIYA a beaucoup travaillé pour la consolidation de la paix, de la stabilité et du rayonnement de notre pays. Ce sont des acquis qu’il faut préserver. Les militants du RDPC dans les dix (10) régions sollicitent et obtiennent toujours une autorisation d’un Sous-préfet pour tenir les meetings politiques. Cette autorisation précise d’ailleurs que les organisateurs du meeting doivent s’assurer que l’ordre est maintenu pendant les assises. Les avocats sont sensés défendre le droit des clients. Si un avocat au mépris des textes en vigueur se trouve en train de participer à une manifestation sur la voie publique sans aucune autorisation, il doit savoir qu’il est un vandale en ce moment-là et il devrait être traité comme tel. Les avocats n’ont aucune immunité en dehors des salles des audiences encore moins les enseignants. Ce débat entre anglophones et francophones n’a plus de sens. Aujourd’hui, vous avez de nombreux parents des Régions du Centre, du Littoral, du Sud, de l’Extrême-Nord, du Nord, de l’Est, de l’Adamaoua qui envoient leurs enfants étudier à Bamenda et à Buéa. Ces enfants bien qu’originaires des régions d’expression française ne s’expriment qu’en anglais ou du moins l’ont comme première langue de travail. Vous avez aussi au Cameroun, les parents originaires des Régions du Nord-Ouest et Sud-Ouest résidant à Yaoundé ou à Douala dont les enfants n’ont fait que le cycle francophone et ne parlent que français comme première langue. Le débat est donc simple et il me semble inutile de poser cette question à ces avocats et enseignants soi-disant Anglophones : au Cameroun aujourd’hui, qui est Anglophone et qui est Francophone ? La réponse est simple : avant d’être Anglophone ou Francophone on est d’abord Camerounais. C’est l’essentiel. Les avocats devraient savoir qu’ils sont tous membres du Barreau. Et le Bâtonnier de l’Ordre a un représentant dans toutes les Régions du Cameroun. Les soi-disant ‘’North-West Lawyers Association’’ ou ‘‘la Meme Lawyers Association’’ sont illégales et ne peuvent en aucun cas constituer un forum pour des revendications fantaisistes inacceptables et intolérables. Ce message est direct et clair et sans équivoque. Un avocat a une relation avec un client. Si vous percevez de l’argent d’un client pour la défense de ses intérêts et pendant plus d’un mois, votre client n’est pas assisté au Tribunal, l’avocat devient un escroc et sera traité comme tel. L’ordre des avocats a pour tutelle le Ministère de la Justice. Le Ministre d’Etat, Ministre de la Justice, Garde des Sceaux a invité les avocats à une réunion pour débattre des éventuels problèmes et trouver les pistes de solutions. Plusieurs avocats et surtout les anciens qui ont fait l’honneur à la profession ont assisté à cette importante réunion. Paradoxalement, Maître BOBGA qui a déjà dévoilé ses intentions en prenant fait et cause pour le retour au fédéralisme de 1961 n’a pas daigné assister à cette importante réunion. Cela est aussi valable pour les enseignants que nous invitons à se détourner du mauvais chemin et à faire confiance au Gouvernement qui n’a jamais fermé la porte quand il s’agit des revendications pertinentes et posées dans un cadre légal. Le Ministre de l’Enseignement supérieur, le Ministre des Enseignements secondaires et la Ministre de l’Education de Base ont toujours écouté les doléances des enseignants. SUR LA PRETENDUE MARGINALISATION DES ANGLOPHONES AU CAMEROUN Depuis bientôt quinze (15) ans, nous nous sommes toujours efforcés à dire aux Camerounais des Régions du NordOuest et Sud-Ouest qu’ils ne sont pas marginalisés au Cameroun. Mieux, nous prenons la peine de démontrer que depuis 1982, Son Excellence Paul BIYA a toujours accordé aux Anglophones un traitement préférentiel. Je vous en donne quelques preuves. SOLIDE ALLIANCE POLITIQUE AVEC LA REGION DU NORD-OUEST ET SUD-OUEST Depuis 1982, Son Excellence Paul BIYA a célébré tous les grands évènements politiques du Cameroun à Bamenda et à Buéa. L’histoire retiendra que la première visite officielle de Son Excellence Paul BIYA en tant que Chef d’Etat était à Bamenda le 09 Février 1983. Au cours de cette visite historique et mémorable, le Chef de l’Etat déclara ‘‘BAMENDA is my second Home’’ Après cette première visite, le Gouvernement a présenté un projet de l’organisation d’un grand COMICE Agropastoral. Ceux qui ont ficelé ce projet avaient suggéré au Chef de l’Etat de l’organiser dans une autre région. Pour consolider le contrat social signé avec la Région du Nord-Ouest, Son Excellence Paul BIYA décida contre toute attente que ce grand COMICE Agropastoral se tiendra à nouveau à Bamenda. Le Chef de l’Etat a effectué le 27 Octobre 1984 une autre visite à Bamenda pour l’ouverture solennelle du premier COMICE de l’ère du Renouveau. Par la suite, l’Union Nationale Camerounaise, l’ancien parti Unique devait tenir ses assises statutaires en 1985. Les observateurs politiques étaient convaincus cette fois que le Congrès du Parti au Pouvoir se tiendra à coup sûr dans une autre Région. Son Excellence Paul BIYA en a décidé autrement car ce grand Congrès s’est tenu le 24 Mars 1985 encore à Bamenda ; c’est bien lors de ces assises du Parti que le Rassemblement Démocratique du Peuple Camerounais (RDPC) est né à Bamenda. Le 10 Décembre 2012, le Chef de l’Etat, Chef des Armées est encore venu à Bamenda pour la célébration du cinquantenaire de nos forces de défense et comme Son Excellence Paul BIYA réserve toujours des surprises, il a officiellement annoncé la création de The University of Bamenda devenue immédiatement opérationnelle. En ce qui concerne les nominations, il est important de signaler que le potentiel électoral de la Région du NordOuest et du Sud-Ouest représente 19%. Mais dans la répartition des postes de responsabilités, le Chef de l’Etat a toujours réservé aux deux régions d’expression anglaise un quota de 37% : les preuves sont assez éloquentes. Le Cameroun compte huit (08) universités d’Etat, trois (03) sont dirigées par les ressortissants des deux régions anglophones : Bamenda, Buéa, Maroua. Les Premiers Ministres, Chefs des Gouvernements successifs depuis 24 ans sont tous les ressortissants des régions d’expression anglaise : Simon ACHIDI ACHU (1992-1996), Peter MAFANY MUSONGUE (1996-2004), ENONI Ephraïm (2004-2009) et depuis 2009 Philémon YANG. Son Excellence Paul BIYA est le Président National du RDPC, le Premier Vice-Président du RDPC, est le FON Angwafor III, Fon de Mankon. Au Cameroun, il existe les postes de responsabilités certes mais il existe aussi les postes de responsabilités stratégiques et névralgiques. En 2016, 40 % de tous les postes de responsabilités stratégiques ont été confiés par le Chef de l’Etat aux ressortissants des Régions d’expression anglaise. Le Directeur Général des Douanes du Cameroun et le Directeur Général du Trésor du Cameroun sont les ressortissants de la Région du Nord-Ouest. Ces deux hauts commis de l’Etat gèrent annuellement plus de 1000 milliards de FCFA. Le Président du Conseil Electoral d’ELECTIONS CAMEROON et le Président de la Commission nationale des droits de l’Homme et des libertés sont tous de la Région du Nord-Ouest. Par le passé, les professeurs d’université issus des deux Régions d’expression anglaise ont été nommés tour à tour Chancelier et Recteurs d’importantes universités d’Etat à Yaoundé. Le Professeur Ephraïm NGWAFOR a été nommé Recteur de l’Université de Yaoundé II-SOA, le Professeur CHUMBOW BEBAN Sammy a été nommé Recteur de l’Université de Yaoundé I, le Professeur Peter AGBOR TABI de regrettée mémoire et Professeur Madame Dorothy NJEUMA ont été nommés respectivement Chancelier de l’Université de Yaoundé et Recteur de l’Université de Yaoundé I. En 2016, les statistiques démontrent clairement que les ressortissants des Régions d’expression anglaise constituent la force dominante à la Présidence de la République. Le Grand Chancelier des Ordres Nationaux (Peter MAFANY MUSONGUE), le Ministre Secrétaire Général n° 1 de regrettée mémoire (Peter AGBOR TABI), le Ministre chargé de mission (ATANGA NJI Paul) qui est aussi Secrétaire Permanent du Conseil National de Sécurité et le Ministre chargé de mission MENGOT Arrey Victor. Il est important de noter que le Directeur de la Sécurité Présidentielle depuis plus de seize (16) ans est un digne fils de la Région du Nord-Ouest, le Général de Division YENWO Ivo. Le Chef de l’Etat ne nomme à ces postes névralgiques que ceux à qui il fait entièrement confiance. Dans ce chapitre des nominations, il y a le cas des autres membres du Gouvernement, des Ambassadeurs, des Directeurs Généraux originaires des Régions d’expression anglaise encore en fonctions que nous n’avons pas évoqué mais qui demeure assez éloquent. Comment peut-on dans un tel contexte affirmer gratuitement que les Anglophones sont marginalisés et traités comme les citoyens de seconde zone au Cameroun. Ceux qui propagent de tels mensonges grossiers seront comptables devant l’histoire et devant Dieu pour cette ingratitude qui n’honore pas les hommes de bons sens. Au Cameroun, les Anglophones ne sont pas marginalisés. C’est un fait. Fort de ce constat éloquent, nous pouvons conclure à juste titre que Son Excellence Paul BIYA a toujours accordé aux Anglophones un traitement préférentiel. Les Avocats grévistes et les enseignants doivent reprendre le bon chemin, le chemin de la sagesse. Le débat sur le fédéralisme est clos car le pays a évolué et ne retournera pas en arrière. Le pays a connu la Réunification en 1961 et l’Etat unitaire en 1972. Depuis 1982, Son Excellence Paul BIYA a travaillé pour le renforcement de cette unité Nationale et à ce jour les Camerounais sont fiers de vivre partout sans la moindre barrière fondée sur les considérations linguistiques. Les avocats et les enseignants doivent savoir que le bilinguisme est un facteur d’Unité nationale. Lorsque le Chef de l’Etat se déplace pour une visite à Bamenda ou à Buéa, son discours est toujours prononcé dans un anglais parfait, shakespearien même. C’est cela le bon exemple de l’intégration nationale. Le Chef de l’Etat a décidé de célébrer le cinquantenaire de la Réunification à Buéa. C’est un honneur immense pour la région du Sud-Ouest. Les ressortissants du Département du Noun auraient souhaité accueillir cette célébration car la conférence de la Réunification s’est tenue à Foumban en 1961. Le Chef de l’Etat a une fois de plus choisi la zone anglophone. Les Camerounais des deux régions d’expression anglaise doivent dire Merci au Chef de l’Etat, mille (1000) fois MERCI car Son Excellence Paul BIYA accorde beaucoup de considération aux fils des deux Régions. Personne ne peut dire le contraire au risque de paraître ridicule, inconséquent et intellectuellement malhonnête. Les Elites du Nord-Ouest et du Sud-Ouest ne permettront à quiconque de remettre en cause l’unité nationale, un bien commun, un grand acquis de la Nation qui restera à jamais non-négociable. ATANGA NJI Paul Délégué Permanent du RDPC pour le Département de la

Ministre chargé de Mission Secrétaire Permanent du Conseil National de Sécurité

<https://www.cameroon-tribune.cm/article.html/3033/en.html/ceux-qui-parlent-de-la-marginalisation-anglophones-au-cameroun-sont-intellectuellement>

# Bamenda : retour à la normale By Shey Peter MABU 28 Nov. 2016

Philemon Yang a dialogué vendredi et samedi derniers avec les leaders syndicaux du corps enseignant et des avocats. Un agenda élaboré pour mettre un terme à la grève des enseignants. Pendant de longues heures les 25 et 26 novembre 2016, le Premier ministre, chef du gouvernement, Philemon Yang, a échangé à Bamenda avec les forces vives de la région du Nord-Ouest pour un retour à la paix. C’était au lendemain du mouvement insurrectionnel qui a paralysé Bamenda le 21 novembre 2016, dans un contexte marqué par la grève des enseignants et des avocats. Pour y mettre un terme, le chef du gouvernement en personne est descendu sur le terrain. Accompagné du gouverneur de la région du Nord-Ouest, Adolphe Lele Lafrique, et du directeur de cabinet du Premier ministre, Pr Paul Ghogomu, le chef du gouvernement a eu de longs entretiens avec des délégations séparées de leaders syndicaux du corps enseignants, des avocats, des hommes d’église, des hommes politiques, des responsables de la société civile, des chefs traditionnels, des journalistes et des moto-taximen. En ce qui concerne la grève déclenchée par des syndicats d’enseignants, certains leaders syndicaux ont déclaré au reporter de CT sur place qu’un agenda comportant huit points a été adopté pour baliser la voie qui conduira à une suspension du mouvement de grève le ou avant le 30 novembre 2016. Cela passe, selon la même source, par la mise en œuvre d’au moins l’une des exigences des grévistes, parmi lesquelles la création d’un nouveau cadre institutionnel pour examiner les problèmes soulevés par les enseignants. Au terme des consultations, la population a salué l’initiative prise par le Premier ministre qui est venu discuter des problèmes menaçant la paix sociale. Après les tristes événements du 21 novembre dernier, le calme est revenu à bamenda. les populations se sont rendues tranquillement hier dans les églises, mosquées, réunions familiales... bamenda respire de nouveau la sérénité.

[https://www.cameroon-tribune.cm/article.html/3027/en.html/bamenda-retour 1/1](https://www.cameroon-tribune.cm/article.html/3027/en.html/bamenda-retour%201/1)

# Recent Violence In Bamenda, Buea: NCHRF Investigates Alleged Human Rights By (É) Jean-Paul KOMON, Le Président Du CNAMSMD, 01 Déc. 2016

Abuses The report from Bamenda has already been submitted while investigations are still going on in Buea. The National Commission on Human Rights and Freedoms, NCHRF, says it is investigating possible human rights violations during last month’s violent protests in Bamenda following the long-running strike by Common Law lawyers. Similarly, the Commission is also probing last month’s violence in Buea during an attempted protest march by Common Law lawyers and the recent handling of the strike by University of Buea students. The disclosure was made in Yaounde yesterday, December 1, 2016, by NCHRF’s Secretary General, Eva Etongue Mayer at the opening of a one-day workshop for the Commission’s Focal Points in different government ministries and agencies. Mayer said the report from Bamenda has already been submitted and is being studied for the Commission to take a decision. Meanwhile, Commission field staff are still investigating the recent incidents in Buea. Concerning the workshop for Human Rights Focal Points, the NCHRF Secretary General said since their putting in place in 2007, there had been relapse in the follow-up of activities. She attributed this to some Focal Points going on retirement, transferred or reassigned to other duties. This, she admitted, made the follow-up of human rights activities in their ministries difficult. In a related development, NCHRF officials say Cameroon is failing in its commitments with regards to the promotion and protection of human rights due to the absence of effective collaboration between the Commission and partners. As a result, Cameroon is often late in submitting in-depth reports to various treaty bodies as required by ratified conventions, NCHRF sources acknowledged. Thursday’s workshop had as objectives to familiarise with different Focal Points (old and new), spell out their role, share experiences and good practices, identify challenges and discuss the mandate and powers of NCHRF. Others were strengthening partnership between NCHRF and ministries in promoting and protecting human rights, promoting the image of Cameroon as an unfailing defender of human rights, and working out better cooperation approaches. [https://www.cameroon-tribune.cm/article.html/3205/en.html/recent-violence-in-bamenda-buea-nchrf-investigates-alleged-human-rights-abuses 2/2](https://www.cameroon-tribune.cm/article.html/3205/en.html/recent-violence-in-bamenda-buea-nchrf-investigates-alleged-human-rights-abuses%202/2)

# Evènements de Bamenda et Buea: « Le gouvernement dénonce les informations mensongères » By 05 Déc. 2016

L’intégralité du propos liminaire du ministre de la Communication lors de son point de presse vendredi dernier à Yaoundé. « Mesdames, messieurs les journalistes Je vous souhaite à toutes et à tous une chaleureuse bienvenue à l’occasion de cet échange auquel je vous ai conviés, afin que nous débattions d’une actualité de la plus haute importance. En effet, le Département d’État américain vient de publier un communiqué de presse faisant état d’atteintes diverses aux libertés fondamentales au Cameroun, notamment dans la gestion des manifestations à Bamenda et à Buea. Dans le souci d’une information exacte de l’opinion publique nationale et internationale sur les allégations y contenues, le Gouvernement camerounais tient à rétablir la vérité sur certains faits. S’agissant de l’action des pouvoirs publics dans le cadre de la gestion des récentes manifestations survenues à Bamenda et à Buea, le Gouvernement s’est attelé à maintenir le dialogue et la concertation, dans le but de trouver des solutions appropriées aux revendications des avocats et des enseignants d’expression anglaise. Sous ce registre, des mesures appropriées ont été prises, en l’occurrence : - la visite de travail à Bamenda du Premier ministre, Chef du gouvernement, du 25 au 27 novembre 2016, à l’effet de discuter avec les représentants des avocats et des enseignants; - la création, par le Premier ministre, Chef du gouvernement, d’un comité interministériel chargé d’examiner les problèmes des enseignants ; - l’ouverture des négociations sectorielles, à la diligence respective du Ministre d’État, ministre de la Justice, Garde des Sceaux d’une part, et du ministre de l’Enseignement supérieur d’autre part. Le Premier ministre, Chef du gouvernement, a en outre annoncé : -la création d’un comité ad hoc, présidé par son directeur de Cabinet, pour régler les préoccupations exprimées par les enseignants d’expression anglaise ; - l’octroi d’une dotation spéciale de deux milliards de F aux établissements d’enseignement privé laïc et confessionnel ; - le recrutement spécial de 1 000 jeunes diplômés de l’enseignement supérieur et technique, parfaitement bilingues. Dans le même temps, le ministre, secrétaire général de la présidence de la République a, sur très hautes instructions du chef de l’État, procédé le 28 novembre 2016 à la réception des versions anglaises du Traité et des Actes Uniformes OHADA, qui constituaient l’une des revendications fortes des avocats. Ces textes ont été transmis au ministre d’État, ministre de la Justice, Garde des Sceaux, qui les a solennellement remis au bâtonnier de l’Ordre des avocats. Par ailleurs, à l’Université de Buea, les pénalités liées au paiement tardif des droits universitaires ont été levées et les diligences sont en cours pour le paiement de la prime académique à l’excellence. Au plan sécuritaire, les autorités administratives et les forces de maintien de l’ordre ont fait preuve de retenue et de professionnalisme dans la gestion des manifestations de Bamenda et de Buea, dans le strict respect de la loi et des engagements internationaux du Cameroun en matière de droits de l’Homme. Des enquêtes sont diligentées sur les cas d’exactions signalés et les mesures disciplinaires appropriées seront prises si ceux-ci s’avèrent exacts. Mais de manière générale, le Cameroun rappelle que dans tout Etat de droit, il est de la responsabilité première des pouvoirs publics de veiller au respect de l’ordre et de la sécurité. L’exercice par les citoyens de leurs droits, à l’instar du droit de grève, se fait dans les conditions fixées par la loi. Sur ce plan, l’action des forces de maintien de l’ordre ne saurait être mise en parallèle avec celle de personnes ayant délibérément enfreint la loi et s’attaquant aux citoyens et à leurs biens ou encore aux biens publics. Sous ce rapport, le gouvernement souligne que les forces de maintien de l’ordre ont été à maintes reprises agressées. Les coupables de tels actes s’exposent à des poursuites devant les tribunaux et auront les sanctions qu’ils méritent. Concernant à cet égard le bilan des récentes tensions sociales à Bamenda, le Gouvernement camerounais déplore une vingtaine de blessés et un décès, un vigile tué par des vandales faisant usage d’une arme artisanale. Cet assassinat est par ailleurs à rapprocher de celui perpétré il y a quelques semaines contre un gendarme à Bangolan par une arme artisanale. Le gouvernement camerounais condamne de la manière la plus sévère ces actes odieux, qui ne resteront pas impunis. L’on note au total qu’il est injustement reproché aux forces de maintien de l’ordre des exactions non avérées, alors même que des agressions contre lesdites forces et même la mort d’un gendarme sont passées sous silence. Sur un autre plan, les allégations relatives à des peines de dix ans de prison infligées à des jeunes pour avoir échangé des messages textes se référant à Boko Haram, sont infondées. En effet, l’instruction publique de cette affaire, en conformité avec la loi sur la répression du terrorisme, avait conduit à la relaxe de deux des trois mis en cause. Le dernier concerné, condamné à onze mois d’emprisonnement le 22 février 2016 pour propagation de fausses nouvelles, a été depuis lors remis en liberté. Le gouvernement camerounais réaffirme donc son attachement profond à l’exercice en toute sérénité des libertés politiques. S’agissant notamment de la préoccupation relative à l’interpellation des militants d’une formation politique mentionnée dans le communiqué de presse du Département d’État, il convient de relever avec force que dans tous les pays, l’organisation des réunions publiques est encadrée par des règles de droit dont le respect s’impose à tous. Nul ne saurait se soustraire à l’exigence de se conformer strictement aux dispositions légales et réglementaires en la matière, en arguant d’un quelconque statut particulier. Au demeurant, lesdits militants ont été tous relâchés après identification. Le gouvernement camerounais saisit la présente occasion pour attirer l’attention des uns et des autres sur les conséquences graves découlant d’une utilisation inconsidérée et délibérément malveillante des réseaux sociaux. Il dénonce avec la plus grande fermeté la propagation d’informations mensongères, la manipulation des esprits et les méthodes d’intimidation au moyen des réseaux sociaux, et rappelle que les personnes convaincues de tels actes s’exposent aux sanctions prévues par la loi. Au total, le gouvernement camerounais réitère son engagement constitutionnel et inébranlable à protéger les droits de l’homme, les libertés publiques mais également à assurer son devoir régalien de maintien de l’ordre public. Ce faisant, il doit être rappelé qu’aucune atteinte à l’unité et à la cohésion nationales, ainsi qu’à l’intégrité territoriale, si chèrement acquises, ne sera tolérée. Le gouvernement camerounais, en conformité à son option d’ouverture au dialogue, réitère son engagement sans faille à renforcer sa collaboration avec les pays amis en vue de la promotion des droits de l’homme par les canaux constructifs, dans le respect de la souveraineté et de l’indépendance de chaque partie. Il se félicite à cet égard du bon fonctionnement des canaux de concertation mis en place à cet égard avec les partenaires internationaux, notamment dans le cadre du dialogue politique structuré avec l’Union Européenne ou encore de la plateforme d’échanges sur ces questions instituées entre le Ministère des Relations Extérieures et l’Ambassade des États-Unis d’Amérique à Yaoundé. Le gouvernement réitère son appel à la tolérance, à la pondération, au sens de la responsabilité citoyenne et au dialogue, qui sont des valeurs partagées ayant contribué à forger l’identité si particulière de la nation camerounaise. De tout temps, le président de la République, Son Excellence Paul BIYA, a en effet fait de la concertation et du dialogue un crédo politique dans la mission que le peuple camerounais lui a souverainement confié à la tête de l’État. Notre nation est diverse et plurielle, et c’est en cela qu’elle puise toute sa force et toute sa richesse, car ce qui nous rassemble est infiniment plus grand que ce qui pourrait par moment nous opposer. Nous devons tirer tous les bénéfices de ce formidable atout naturel transmis de génération en génération dans la genèse de notre histoire. Et c’est ainsi que le Cameroun continuera sa marche vers sa grandeur et son émergence. Cet appel à l’unisson, je voudrais, au nom du Gouvernement, saisir la présente occasion et le réitérer, pour qu’il se manifeste une fois de plus, au moment où nos valeureuses Lionnes Indomptables s’apprêtent à aller l’ultime conquête de la 10ème édition de la Coupe d’Afrique des Nations de football féminin que le Cameroun organise pour la toute première fois, afin de les soutenir à bout de bras et les conduire vers la victoire finale. Je vous remercie de votre aimable attention ».

[https://www.cameroon-tribune.cm/article.html/3287/en.html/evenements-de-bamenda-buea-le-gouvernement-denonce-les-informations-mensongeres- 1/3](https://www.cameroon-tribune.cm/article.html/3287/en.html/evenements-de-bamenda-buea-le-gouvernement-denonce-les-informations-mensongeres-%201/3)

# Resumption Of Schools In The NW Region: Communiqué By NW Elite, Senators And MPs By Saurelle NINGUEM (Intern) 05 Déc. 2016

Communiqué By NW Elite, Senators And Members Of The National Assembly Calling For Peace And Resumption Of Schools In The NW Region Mindful of government resolve to give commensurate attention to teachers’ and lawyers’ grievances through constructive dialogue as testified by the Head of State, sending the Prime Minister, Head of Government to dialogue with Teachers, Lawyers, and Civil Society in Bamenda on 25 and 26 November 2016, Mindful of the first meeting of the Inter-Ministerial Committee presided over by the Minister of Higher Education to look into teachers’ grievances at the end of which a comprehensive recommendation arrived at was submitted for consideration by Government, Mindful of the special meeting chaired by the Minister of State, Minister of Justice and Keeper of the Seals to examine and dialogue with Members of the Bar Council that was held on Tuesday, 22 November 2016 to seek solutions to Anglophone Lawyers’ grievances, As concerns Anglophone Lawyers’ grievances; 1. Considering the formal handing over to Cameroon Government of the English text of the OHADA Uniform Act which was subsequently handed over to the Bar Council President in both hard and electronic versions, and posted on the websites of the Ministry of Justice and Bar Council, 2. Considering the imminent holding of the Stakeholders Meeting (Etat Generaux) of the Justice sector as requested by the Head of State, a forum in which the other grievances of Anglophone lawyers will be detailly examined by an Ad hoc Committee and resolutions thereof submitted for consideration by the Head of State, guarantor of our judicial system, 3. Considering the opening of judicial investigations by the Attorney Generals in NW and SW regions on allegations of molestation, brutality, seizure of wigs and other acts against lawyers in Bamenda and Buea which will permit the appropriate sanctioning of authorities guilty of acts of violence in consonance with the laws in force. As concerns Teachers’ grievances; 1. Considering the creation, organisation and functioning of the ad hoc inter-ministerial committee tasked with examining and proposing solutions to the concerns raised by Anglophones teachers’ trade unions in the format requested by the leaders themselves in their 8-point resolution submitted to the Prime Minister, Head of Government following the meeting of 26 November 2016 in Bamenda. And trusting that the resolutions accruing from the deliberations of the committee shall be submitted directly to the Prime Minister, Head of Government and all pertinent recommendations shall be examined by Government to improve the Anglophone subsystem of education, 2. Conscious of the allocation of a sum of 2 billion (2,000,000,000) Francs CFA by the Head of State as special subsidy to lay private and denominational schools which will help alleviate the burden of cost in running these schools. 3. Cognisant of the special recruitment of 1000 bilingual technical school teachers to address the problem of shortage of teachers especially in Anglophone Technical schools and colleges, 4. Considering that on the instruction of the Head of State, formal judicial enquiry has been opened by the Attorney Generals in the Southwest and Northwest Regions on alleged violence on students in Bamenda and Buea and trusting that at the end of the on-going investigations appropriate measures shall be taken in accordance with the laws in force, 5. Considering that the boycott of schools and classes by teachers is penalising our children some of whom have to sit for official national and international examinations with other children and pupils who are regularly going to school unperturbed thereby jeopardizing the future of our children, 1. Convinced that the eventual resolution of all pertinent grievances by government cannot bring back the immense consequences on the children and universities due to the time lost, 2. Trusting that government has in the past listened to problems of the Anglophone subsystem of education as testified by the creation and management of the GCE Board, sole agency managing official exams at secondary school level; And that Government will continue to do so, We the North West Elite, Senators and Members of the National Assembly hereby: 1. Appeal to all teachers, lawyers, school proprietors, the civil society, politicians, traders, bayam selams, parents, economic operators, taxi men, motor bike riders, students, pupils and all citizens of good will, to see reason and trust the government’s good faith for dialogue and peaceful resolution of all the pertinent grievances presented by teachers and lawyers; 2. Appeal particularly to teachers, pupils and parents for normal resumption of schools to avoid jeopardising the future of our children; 3. Pray the lawyers to end their boycott of the courts which have a negative effect on their clients and call on them to instead hold meaningful consultations in view of tabling pertinent and exhaustive grievances during the imminent upcoming Stakeholders of the Justice system meeting in their quest to preserve the bi-jurial nature of our justice system; 4. Pledge our total support for peace, stability and tranquillity in our Region; 5. Affirm our unflinching support for a one, united and indivisible fatherland, Cameroon; 6. Strongly condemn the exploitation by unscrupulous politicians, Southern Cameroon’s National Congress (SCNC) infiltrators of teachers’ and lawyers’ grievances to call for ghost towns and secession of the Anglophone part of Cameroon; 7. Fervently condemn all forms of violence and social tension that jeopardize the peace and security of our beloved fatherland irrespective of the source; 8. Pledge our unflinching support to His Excellency, President Paul BIYA and the government with the continuous open door policy as they find lasting solutions to the pertinent grievances put forward by Anglophone teachers, and lawyers and eventually others; Done in Yaounde, on Sunday, 4th December 2016 Signed: Atanga Nji Paul, Mbah Acha Rose F., Fuh Calistus Gentry, Doh Jerome Penbaga, Solomon Azoh-Mbi, Fonye Francis, Fohtung Samuel T, Simon Achidi Achu, Fon Teche Njei Ii, Wanlo Chamoa John, Awanga Zacharias, Fon Ganyogah, Emma Eno Lafon, Wallang David, Dingha Ignatius, Njingum Musa, Kwei Andrew, Mbumseck Genesis, Banmi Emmanuel, Wallang Richard, Enwe Francis, Abety Peter; Kibuh Henry, Shey Jones Yembe, Nji Fidelis, Melo Uphie Chinje, Lantum Daniel, Fongod Edwin, Moh Sylvester, Sammy Chumbow, Fon. Chafah Isaac, Fru Angwafor, Mbayu Felix,Tan Paul, Nwana Sama Bernard, Gabsa Wilfred, Agwara Moise, Kilo Asheri, Shey Peter Mabu, Chimangha Linus, Chi Asafor, Sama Juma, Fru Jonathan, Simon Tamfu, Akwa Patrick, Bungo Jean Paul, Okie Johnson, Gabsa Wilfred, Doh Anderson, Ndzo Celestin, Adamu Musa, Nuhu Sali, Gabche Vincent Gabche, Chiangeh Grace, Tamanjong Moses, Foryang Godfred Fumbi, Dimla Lambert, Ngoran Austin, Kaah Ernest Mbuh, Isa Adamu, Abbas Mohamadou, Nying Divine

<https://www.cameroon-tribune.cm/article.html/3269/en.html/-resumption-of-schools-in-the-nw-region-communique-nw-elite-senators>

# Université de Buea : des mesures d’apaisement

By Erick Maville, Directeur Général Santé En Entreprise (SEE) 05 Déc. 2016

Après les mouvements d’étudiants la semaine dernière, l’administration a engagé le dialogue et pris des décisions qui ont ramené le calme. En début de semaine dernière, l’université de Buea a été secouée par les revendications d’étudiants. Ces derniers ont manifesté leur mécontentement à cause du non-paiement de la prime spéciale (50 000F) octroyée par le chef de l’Etat, le paiement d’une amende de 10 000F pour « inscription tardive en ligne », entre autres. Après un dialogue fructueux, l’administration de l’université a accédé aux désidératas des étudiants. En effet, il a été procédé à la suppression de la pénalité de 10 000F imputée à tous les étudiants en retard dans le paiement des frais universitaires. Un communiqué signé du Vice-chancellor, le Pr Nalova Lyonga, a formellement mis fin à cette pratique. Une décision qui est venue réconforter les étudiants. La deuxième mesure forte et saluée a été le début du paiement de la prime présidentielle. C’est depuis jeudi dernier, en effet, que les bénéficiaires rentrent en possession du don du chef de l’Etat. Les étudiants ont accueilli la nouvelle avec enthousiasme et ont félicité la célérité avec laquelle l’administration a facilité les choses. Au sujet des manifestants interpellés, le gouverneur de la région du Sud-Ouest, Bernard Okalia Bilai, a indiqué qu’ils seront tous libérés, après bouclage de l’enquête par les autorités judiciaires. Le Pr Nalova Lyonga a réitéré la volonté du gouvernement de promouvoir le dialogue, en vue de trouver des réponses aux préoccupations des étudiants. Elle a invité ces derniers à plus de calme et de responsabilité dans la formulation de leurs préoccupations. [https://www.cameroon-tribune.cm/article.html/3286/en.html/universite-de-buea-mesures-dapaisement 1/1](https://www.cameroon-tribune.cm/article.html/3286/en.html/universite-de-buea-mesures-dapaisement%201/1)

# Adolphe Lele Lafrique : “Government Will Continue To Give Dialogue A Chance” By Erick Maville, Directeur Général De L’association Santé En Entreprise (SEE) 06 Déc. 2016

North West Governor, Adolphe Lele Lafrique on the state of the region on December 5, 2016. Cold you size-up events that disturbed regular business activities in Bamenda on December, 5, and 2016? First of all, let me salute the concern of all who are working toward lasting peace in the North West region. We have been constantly on the field, sensitizing various stakeholders and the population. We have chaired meetings and met traditional leaders to help the administration restore peace. Those moves have yielded fruits and the situation has been stabilized since the disorder of November 21, 2016 until Monday December 5, 2016 when some incidents made some of our Security Forces to clash with some vandals who attempted to prevent traders and Commercial motorcycle riders from work. I take this opportunity to salute the professionalism of the Security Forces in handling the situation. Over the weekend, the SDO of Mezam Division sent a message to the population of Bamenda to carry out their activities as usual because there are security measures to protect people and their property. This is to say that the situation in Bamenda is globally calm even if some shops were closed. I therefore appeal to the population to mobilize and prevent hijackers from attempts to destroy their tranquility and their economy and to stand by the law in their support for the administration to bring lasting peace. Nothing will be neglected to ensure the security of the population and their property. It is certain that perpetrators of disorder will b sanctioned. How do you explain the reticence of teacher trade Union leaders to stand by the P.M, Head of Government’s creation of the Adhoc Inter-Ministerial Committee to look into their concerns? The Decision by the Head of State and the Prime Minister, Head of Government was largely saluted when I notified leaders of the Teacher Trade Unions. But, we were surprised thereafter that they raised concerns about the implementation of the measures. I reported to the Chairman of the Adhoc Inter-Ministerial Committee who should be on the way to meet the Union leaders and examine the misunderstandings raised. We hope that it is not some hidden hand with a hidden agenda that is trying to usurp the course for unknown motives. Whatever the case, we have appealed to stakeholders of the education in the North West to have their children back in school. We appeal to them to take their responsibility because the government has stretched and will continue to stretch a hand to give dialogue a chance.

[https://www.cameroon-tribune.cm/article.html/3320/en.html/adolphe-lele-lafrique-government-will-continue-give-dialogue 1/1](https://www.cameroon-tribune.cm/article.html/3320/en.html/adolphe-lele-lafrique-government-will-continue-give-dialogue%201/1)

# Buea, Bamenda Demonstrations: Government Denounces Malicious Information By KIMENG HILTON 06 Déc. 2016

Below is the introductory statement of the Minister of Communication, Issa Tchiroma Bakary during a press conference on December 2, 2016 in Yaounde. Distinguished Journalists, Ladies and Gentlemen, I wish you all a warm welcome to this exchange on an issue of utmost importance. As a matter of fact, the U.S. Department of State has just published a Press Statement alleging infringement on fundamental freedoms in Cameroon, notably in the management of demonstrations in Bamenda and Buea. In a bid to avoid any controversy on the allegations contained in the press statement and in order to enlighten national and international community, the Government of Cameroon would like to draw attention on some issues. With regard to the action of Public Authorities in the management of recent demonstrations which took place in Bamenda and Buea, the Government has made efforts to maintain dialogue and cohesion, to seek appropriate solutions to the grievances of English-speaking lawyers and teachers. In this vein, appropriate measures have been taken as follows: The Prime Minister, Head of Government, paid a working visit to Bamenda, from November 25 to 27, 2016 to discuss with representatives of lawyers and teachers ; The Prime Minister, Head of Government has set up an Ad Hoc Inter-ministerial Committee tasked with examining and proposing solutions to the concerns raised by teachers ; Sector-based negotiations have been open under the due diligence of the Minister of State, Minister of Justice, Keeper of the Seal, on the one hand, and the Minister of Higher Education, on the other hand; The Prime Minister, Head of Government, announced in addition: The setting up of an ad hoc committee to be chaired by the Director of Cabinet of the Prime Minister, Head of Government, to propose solutions to the concerns raised by English-speaking teachers ; The granting of a special allocation of FCFA 2,000,000,000 (two billion CFA francs) to private secular and denominational schools ; The special recruitment of one thousand perfectly bilingual graduates of higher general and technical education; It should be underscored that concomitantly, the Minister, Secretary General at the Presidency of the Republic, on Special Instruction of the President of the Republic, received on November 28, 2016, the English versions of the OHADA Treaty and Uniform Acts, which are some of the cogent grievances of the lawyers. The translated documents were forwarded to the Minister of State, Minister of Justice, Keeper of the Seals, who solemnly handed them over to the Chairman of the Bar Association. Meanwhile, at the University of Buea, the penalties for the late payment of tuitions fees were lifted and some diligent measures have been taken to ensure the payment of the academic gratifications for excellence. With respect to security, administrative officers and law-enforcement officers handled the demonstrations in Bamenda and Buea with restraint and professionalism, in strict compliance with the international laws and commitments of Cameroon in matters of Human rights. Nevertheless, investigations are underway and in the event of proven misconduct, the Government will take some disciplinary and corrective measures as appropriate. In a nutshell, Cameroon reiterates that in any Rule of Law, it is the primary responsibility of Public Authorities to ensure the respect of order and security.The exercise by citizens of their rights, such as the right to go on strike, is done in compliance with the provisions laid down by the law. At this level, the action of law-enforcement officers should not be considered on same footing as persons who willfully infringe the law and go around assaulting citizens, looting private and public properties. The Government is, in this vein underscoring that the law-enforcement officers were on many occasions assaulted. The culprits of such acts are exposed to legal proceedings before the courts and would be punished appropriately. With regard to the balance sheet of the recent social unrest in Bamenda, the Government of Cameroon regrets the toll of some twenty injured and one death, a security guard who was killed by vandals using a locally-made rifle, amid the prevailing security context. This murder is similar to the one perpetrated a few weeks ago against a gendarme in Bangolan with a locally-made rifle. The Cameroonian Government strongly condemns such heinous actions, which will not remain unpunished. We note that forces of law and order are being unjustly accused of committing atrocities, whereas assaults against the said forces including the killing of one gendarme is simply going unreported. In another realm, the allegations relating to ten-year prison sentence inflicted to some young people for having exchanged text messages about Boko Haram are ungrounded. As a matter of fact, the public examination of this matter, in keeping with the law on the suppression of terrorism, had led to the release of two of the three accused. The last one who was sentenced to eleven-month imprisonment on February 22, 2016 for spreading false news, has since then been released. The Government of Cameroon therefore reaffirms its profound attachment to the exercise in all serenity, of civil liberties. With regard to the concern relating to the arrest of militants of a political party mentioned in the press release of the Department of State, it should be strongly underscored that in every country, the organization of public meetings is governed by legal provisions that must be complied with by each and every one. No one can circumvent the requirement to conform strictly to the applicable legal and regulatory provisions, using the argument of having a special status, whichever it may be. It remains however that those militants were all released after being identified. The Government of Cameroon avails itself to draw the attention of everyone on the serious consequences of a willful malicious use of social media. It condemns in the strongest terms, the dissemination of false information as well as the manipulation of minds and methods of intimidation through social media and recalls that those found guilty of such acts shall be appropriately punished in accordance with the regulations in force. In all, the Government of Cameroon reiterates its constitutional and unwavering commitment to ensure its sovereign duty to maintain public order. It should be underscored however, that no attempt to disrupt our hard-won national unity and cohesion and our territorial integrity, shall be tolerated. The government of Cameroon, in keeping with its openness to dialogue, reiterates its unweaving commitment to strengthening collaboration with friendly countries for the promotion of Human rights through instructive channels, in the respect of the sovereignty and independence of each party. In this regard, it commends the sound functioning of consultation frameworks put in place as part of the Structured Political Framework with the European Union or even the platform for exchange on such issues created between the Ministry of External Relations and the Embassy of the United States of America in Yaoundé. The Government once again calls for tolerance, temperance, the sense of citizen responsibility and dialogue, which are shared values that have contributed to shape the peculiar identity of the Cameroonian Nation. In season and out of season, the President of the Republic, His Excellency Paul BIYA, has always made consultation and dialogue a political creed in the mission that has been bestowed on him, in all sovereignty, at the helm of the State. Our Nation is a land of diversity and plurality. These attributes are the very source of its strength and wealth, because what brings us together is greater than anything that could at any given time put us asunder. We should be able to reap all the fruits of this wonderful natural asset passed down from one generation to another from ages to ages. It is by so doing that Cameroon will continue to move towards its grandeur and the attainment of its emergence. Allow me to avail myself, on behalf of the Government, to reiterate this call for unity, which is more than ever necessary, at a time when our brave Indomitable Lionesses are on the verge of conquering the trophy of the 10th edition of the Women's Africa Cup of Nations hosted for the first time by Cameroon, in order to give them our full support that will lead them to final victory. Thank you for your kind attention.

[https://www.cameroon-tribune.cm/article.html/3305/en.html/buea-bamenda-demonstrations-government-denounces-malicious-information 1/3](https://www.cameroon-tribune.cm/article.html/3305/en.html/buea-bamenda-demonstrations-government-denounces-malicious-information%201/3)

# Situation à Bamenda et Buea: la Commission des droits de l’Homme appelle au dialogue By 06 Déc. 2016

Déclaration de la Commission nationale des Droits de l’Homme suite aux évènements récents relatifs aux violations des droits de l’Homme au Cameroun. Dans le cadre des évènements récents ayant marqué l’actualité au Cameroun ces deux derniers mois, notamment : • La grève des avocats anglophones dès le 11 octobre 2016; • La grève des syndicats des enseignants du système anglophone depuis le 21 novembre 2016 ; • Les dénonciations verbales du nommé MANCHO BBC à l’attention du Délégué régional de la communauté urbaine de Bamenda le 21 novembre 2016; et • La grève des étudiants de l’Université de Buea qui a commencé le 28 novembre 2016. La CNDHL est préoccupée par le cas des violations des droits de l’Homme tels que : le droit à la vie, le droit de ne pas être soumis à la torture, traitement cruel, inhumain ou dégradant, le droit à l’éducation, l’accès à la justice, et la liberté d’expression. Par ailleurs, la Commission Nationale des Droits de l’Homme et des Libertés invite chacune des parties concernées par ces évènements à faire preuve de retenue et de civisme ; à éviter le recours à la violence ; et à privilégier la voie du dialogue dans la recherche de solutions durables à tous ces problèmes posés. Aucun effort ne doit être ménagé pour éviter l’usage des mots, expressions et actes susceptibles d’inciter la colère et la violence. La Commission Nationale des Droits de l’Homme et des Libertés invite spécialement le gouvernement à mener des enquêtes sur les problèmes posés et les violations subséquentes des droits de l’Homme, à commencer par des cas de pertes en vies humaines et de torture. Des mesures doivent être prises pour vérifier que ce mouvement de grève ne soit infiltré par des promoteurs de violence pour compromettre les manifestations pacifiques prévues par la loi. La CNDHL s’engage également à mener une enquête indépendante sur la situation et à organiser si possible une enquête publique, vu que son mandat l’autorise à recourir aux actions concertées, au dialogue et à la médiation en vue de la promotion et de la protection des droits de l’Homme. Fait à Yaoundé le 02 décembre 2016. Le président (é) Dr Chemuta Divine BANDA

[https://www.cameroon-tribune.cm/article.html/3356/en.html/situation-bamenda-buea-la-commission-droits-de-lhomme-appelle-au-dialogue 1/1](https://www.cameroon-tribune.cm/article.html/3356/en.html/situation-bamenda-buea-la-commission-droits-de-lhomme-appelle-au-dialogue%201/1)

# Bamenda: Governor Encourages Teacher

By Erick Maville, Directeur Général De L’association Santé En Entreprise (SEE) 06 Déc. 2016

Security forces dislodge some youths preventing shops, Commercial Motorcycle riders from activities in Bamenda. Bamenda ended Monday December 5, 2016 in calm after some clashes that pitted security forces and some unidentified youths who attempted to prevent shops and commercial motorcycle riders from regular activities. The population was gripped by fear of a strike action allegedly called by traders, taxi drivers and commercial motorcycle riders. Tracts circulated over the weekend announcing the strike in solidarity with striking lawyers and teachers. That is perhaps, why many shops remained shot while very few taxis and commercial motorcycles circulated early in the morning. By midday, virtually all the streets were empty with only private cars and some commercial motorcycles circulating while security forces had some running battles with some youths who attempted to erect barricades on some streets. Meanwhile, public offices were open for service with some workers trekking to and back home. Away from that, the gates of schools remained shot on the strength of a December 2 , 2016 release by the All Anglophone Teacher Trade Unions who met in the neighbourhood of Presbyter church center, Ntamulung, Bamenda, their strike action continues into the third week with arguments that the new Adhoc Inter-ministerial Committee enlarged to include all Anglophone educational stakeholders to be chaired by the Director of Cabinet of the Prime Minister, Head of Government does not feature time lines of work and the lifespan of the committee. They argue that the creation has not secured the implementation of any of their requests tabled during their consultations of November 25 and 26 with the Prime Minister. It is against this backdrop that North West Governor, Adolphe Lele Lafrique in a release of December 5, 2016 appealed to the Teacher Trade Union leaders to have faith in the Adhoc Inter-Ministerial Order and actively participate in deliberations when it is convened. Leaders [https://www.cameroon-tribune.cm/article.html/3319/en.html/bamenda-governor-encourages-teacher-leaders 1/1](https://www.cameroon-tribune.cm/article.html/3319/en.html/bamenda-governor-encourages-teacher-leaders%201/1)

# Buea: SW Urged To Show True Face As Nation Builders

By DIDDI Aissatou 07 Déc. 2016

The CPDM Scribe was speaking at the Buea ceremonial ground during a grand party rally called to quell Lawyers and Teachers’ strike action. The 31 Sections of the governing Cameroon People’s Democratic movement (CPDM) from the six Divisions of the South West Region mobilised their militants to the ceremonial grounds in Buea yesterday, December 6, 2016 to call for peace, unity and territorial integrity following the Lawyers and Teachers strike action that has grounded schooling activities in the area for the past two weeks. At the Bongo Square, the Secretary General of the CPDM Central Committee, Jean Nkuete, addressed the mammoth crowd thanking them for turning out marvelously within a short notice. Mr. Nkuete explained that they were meeting in a particular context when Lawyers and Teachers grievances had been given a deformed image by the social network leading to an outburst of violence and political manipulations. He called on the South West to show their true face of a Region that contributes to national unity. He said the CPDM believes in a perfect human community void of inequality and injustice. “The problems that come up here are problems that also exist elsewhere and so the South West cannot be a builder and a destroyer at the same time”, Mr. Nkuete said. He advised the citizens to avoid clashes with the forces of law and order as such often end up regrettably. At the Buea ceremonial ground, a special guest introduced as such in the person of the Prime Minister, Head of Government, Philemon Yang, addressed his South West compatriots calling on parents to send their children back to school. Mr. Yang resonated that the school is where the youth should be to aspire to be responsible citizens and leaders of tomorrow. The political leader of the South West CPDM and former Prime Minister, Peter Mafany Musonge, took to the rostrum and explained that the two weeks have been troublesome for the country. “We refused to accept attempts to reduce our nation to a banana republic”, he said. To him the people of the South West can neither betray nor endanger the peace of this nation”, he asserted. He sued for dialogue as a way of solving problems, especially as the government has offered the employment of 1,000 bilingual teachers, CFA Two billion subvention for private schools and translated the OHADA law into English. Such were the initial requests made by the partners in strike. Musonge rejoiced that the top associations of the Region namely South West Chiefs Conference (SWECC) and the South West Elite Association (SWELA) have remained consistent with Cameroon’s unity. Previous speakers corroborated with one theme, peace, unity and non-violence as proven means of solving differences. They included Ntuba Beatrice from Meme speaking for women, Julius Nkom Nkopt from Manyu for the youth and Mafany Namanga who addressed the rally on behalf of the various sections of the party in the Region.

[https://www.cameroon-tribune.cm/article.html/3398/en.html/buea-sw-urged-show-true-face-as-nation-builders 1/2](https://www.cameroon-tribune.cm/article.html/3398/en.html/buea-sw-urged-show-true-face-as-nation-builders%201/2)

# Bamenda: Ad hoc Inter-ministerial Committee Chair In Bamenda

By Erick Maville, Directeur Général De L’association Santé En Entreprise (SEE) 07 Déc. 2016

Professor Paul Ghogomu Mingo had a meeting with the striking teachers leaders. On the strength of Prime Ministerial Order No. 125/CAB/PM of 29 November 2016, the Chairman of the Adhoc Inter-ministerial Committee created to examine concerns raised by striking Anglophone teachers, the Minister, Director of Cabinet at the Prime Minister’s Office Professor Paul Ghogomu Mingo met with the leaders of the teachers trade unions in Bamenda on December 6,2016. After long hours, it emerged from the closed door session that the Chairman clarified some concerns that featured on the Order creating the Ad hoc Inter-ministerial Committee. One of the teachers Union leaders and Executive Secretary of the Cameroon Teachers Trade Union (CATTU), Wilfred Tasang however, told Cameroon Tribune that an impasse over the concrete way forward to solve some concerns raised, failed to move discussions forward and the strike action continues while waiting for the Ad hoc Inter-ministerial Committee to officially start work.

[https://www.cameroon-tribune.cm/article.html/3399/en.html/bamenda-ad-hoc-inter-ministerial-committee-chair-in-bamenda 1/1](https://www.cameroon-tribune.cm/article.html/3399/en.html/bamenda-ad-hoc-inter-ministerial-committee-chair-in-bamenda%201/1)

# Mobilisation pour la paix à Buea By 07 Déc. 2016

Hier, le secrétaire général du Comité central du RDPC et le Premier ministre Philemon Yang ont rencontré les forces vives et les populations de la ville. Buea, chef-lieu de la région du Sud-Ouest a accueilli hier une forte délégation du Comité central du Rassemblement démocratique du peuple camerounais (RDPC) conduite par son secrétaire général, Jean Nkuete. Présence également remarquée du Premier ministre, chef du gouvernement, Philemon Yang, du gouverneur de la région, Bernard Okalia Bilaï, de Peter Mafany Musonge, chef de la délégation permanente régionale du Comité central du RDPC pour le Sud-Ouest et de nombreuses élites locales. C’est la place des fêtes de Bongo Square, qui a abrité, il y a quelques années, une partie des festivités du cinquantenaire de la Réunification, qui a servi de cadre à cette rencontre qui, pour le secrétaire général du Comité central du RDPC, visait à apporter un message de paix et de réconfort. Ceci après les récents événements que cette ville a enregistrés il y a quelques jours. Ceux-ci avaient notamment trait à des revendications estudiantines et d’autres mouvements d’humeur enregistrés dans la région, notamment de la part des avocats et enseignants exerçant ici. Hier à Bongo Square, Jean Nkuete n’a pas manqué de rappeler à ses interlocuteurs, militants, élites et forces vives du Sud-Ouest, que toutes les régions du Cameroun font face à des problèmes, et que les pouvoirs publics s’emploient à trouver des solutions à ceux-ci. Au rang des mesures prises depuis le début de cette « crise », le secrétaire général du Comité central, de même que l’ensemble des autres orateurs, n’ont pas manqué d’évoquer celles prises récemment par le chef de l’Etat et annoncées le 30 novembre dernier par le Premier ministre. Jean Nkuete a ainsi appelé ses camarades du Sud-Ouest à se classer dans la catégorie des bâtisseurs de la Nation camerounaise qui se veut Une et indivisible. Demain, la délégation conduite par Jean Nkuete mettra le cap sur la région voisine du Nord-Ouest où elle rencontrera également les forces vives locales, les militants du RDPC et les populations de la ville de Bamenda pour un même appel à un retour définitif au calme et à la reprise des cours en faveur des étudiants.

[https://www.cameroon-tribune.cm/article.html/3363/en.html/mobilisation-pour-la-paix 1/1](https://www.cameroon-tribune.cm/article.html/3363/en.html/mobilisation-pour-la-paix%201/1)

# Anglophone Problem: North West Elite On Appeasement Outing

By Erick Maville, Directeur Général De L’association Santé En Entreprise (SEE) 07 Déc. 2016

Outing Elite have scheduled December 8, 2016 to appease striking teachers, Lawyers and to preach peace and unity. From the look of things, metropolitan Bamenda is anxiously expecting lasting solutions towards Lawyers and Teachers Trade Union strike actions whose effects, are rocking the city and the North West region. It is against this backdrop that inhabitants look forward to any acceptable offers that guarantee and give peace a chance. In effect, the city is expected to host North West elite on Thursday, December 8, 2016 on a peace, unity and solidarity mission. The outing, initiated by North West CPDM elite is inspired by the concern for the industrial action of the Lawyers and teachers which many acknowledge, carries legitimate issues and concerns but differ with what some elite say are attempts by others to hijack for unknown motives. An elite of the region on an advanced mission to prepare the outing, Adamu Musa told Cameroon Tribune that the strike actions affect virtually everybody and it is incumbent on elite of the region to show solidarity and help the population to better understand the issues at stake. Adamu Musa stresses that it is a public policy issue and not a political issue but political parties have a voice and a duty to commune with the grassroots in times like this to help militants understand the concerns expressed. In the short and long of it, tomorrow’s outing is expected to feature North West elite, Senators, MPs and all who care about the future of the region and its children. The Secretary General of the CPDM Central Committee, Jean Nkuete is also expected as a special guest of the event. Some elite are so passionate about the need for acceptable and lasting solutions to the concerns which many argue are not only Anglophone problems but problems of the nation. The event comes on the heels of some previous initiatives by other political parties and the very salutary consultations of November 25 and 26, 2016 during which the Prime Minister, Head of Government, Philemon Yang gave the striking Lawyers and teachers a listening ear. The results include ongoing negotiations between the government, Lawyers and teacher trade Union leaders. [https://www.cameroon-tribune.cm/article.html/3404/en.html/anglophone-problem-north-west-elite-on-appeasement-outing 1/1](https://www.cameroon-tribune.cm/article.html/3404/en.html/anglophone-problem-north-west-elite-on-appeasement-outing%201/1)

# Situation à Buea et Bamenda: le salut par le dialogue

By LAMISSA KAIKAI 07 Déc. 2016

Après Buea hier, le secrétaire général du Comité central du RDPC est attendu demain à Bamenda. Ici et là, M. Jean Nkuete a choisi d’aller à la rencontre des compatriotes des deux régions majoritairement d’expression anglaise où de profondes perturbations affectent depuis quelque temps l’activité au quotidien, tant dans les institutions éducatives que dans les cours et tribunaux. L’importance de cette descente sur le terrain est rehaussée par la présence concomitante sur la même scène du Premier ministre, par ailleurs, président de la délégation permanente du Comité central du RDPC pour le Nord-Ouest. On se souvient à cet égard que M. Philemon Yang avait déjà séjourné à Bamenda il y a une dizaine de jours dans un souci manifeste d’apaisement par rapport aux revendications autour desquelles se cristallise le mouvement d’humeur de certaines strates socio-professionnelles. Il s’agit notamment de la disponibilité désormais effective de la version anglaise de l’acte uniforme de l’OHADA. Pour ce qui est de l’amélioration du sous-système anglophone, le chef de l’Etat a pris le taureau par les cornes à travers la mise sur pied d’un comité interministériel chargé d’examiner les préoccupations soulevées par les syndicats des enseignants anglophones. Dans l’optique d’y apporter des solutions appropriées. Jean Nkuete et Philemon Yang ont, à cœur, de prendre le pouls auprès des forces vives des deux régions dans un esprit d’ouverture, de tolérance et de dialogue. En exposant, par ailleurs, les premières mesures prises par le gouvernement pour ramener le calme et la sérénité dans les prétoires et les établissements scolaires et universitaires. Des secteurs aussi sensibles que névralgiques pour la consolidation et l’enracinement de notre expérience démocratique et, plus généralement, pour l’avenir du Cameroun en tant que pays stable et prospère. Mais aussi en tant que nation forte, unie et solidaire et jalouse de ses acquis dans le cadre d’un biculturalisme vivant et parfaitement assumé. Toutes choses qui passent par un incontournable dialogue destiné à renforcer la cohésion d’un peuple tourné vers un progrès partagé. Dans ce sillage s’inscrit l’appel pressant de la commission nationale des droits de l’homme et les libertés (CNDHL) en direction des parties concernées afin que celles-ci fassent preuve de retenue et de civisme, en privilégiant « la voie du dialogue dans la recherche de solutions durables à tous ces problèmes posés ». En évitant, suggère la CNDHL, « l’usage des mots, expressions et actes susceptibles d’inciter la colère et la violence ». Le Cameroun n’est-il pas reconnu comme une

[https://www.cameroon-tribune.cm/article.html/3364/en.html/situation-buea-bamenda-le-salut-par-le 1/1](https://www.cameroon-tribune.cm/article.html/3364/en.html/situation-buea-bamenda-le-salut-par-le%201/1)

# Seeking Rational Solutions

Recent events in the North West and South West Regions of Cameroon have had ripple effects across the country. Public debates, the social media and hearsay channels have doubled and at times dwarfed everyone else in spreading information on the situation making, it look frightening to even voice a contrary view to the maze of extremist literature on English-speaking Cameroonians or what is today qualified as the Anglophone problem by some and rejected by others. It all started with Common Law lawyers asking to exercise their profession according to the Anglo-Saxon tradition and in the language they master best, the English Language. The protracted nature of their problem apparently reminded teachers of their own predicaments and they brought their difficult working environment to the table such as children being taught in Pidgin English in some key subjects by French-speaking teachers. Some even spoke of adulteration of the English sub-system of education in the country. These and other legitimate claims have unfortunately opened the floodgates to extremism, leading to views that completely deviate public attention from the initial complaints tabled by teachers and lawyers. Yet, it must be said that Prime Minister, Philemon Yang made public key decisions taken by the Head of State as contingency solutions to the issues raised and the creation of an Ad hoc committee under the leadership of the Director of Cabinet in the Prime Minister’s Office, himself an informed Cameroonian, to handle the Anglophone problem. Given that camps have been formed in the process of presenting the various claims, it appeared obvious that there could be people with some misgivings across the table. But anyone objecting to the possibility of dialogue to articulate the issues and seek rational solutions to them must be acting under a hidden agenda. How else could people settle differences without having to communicate? Committing the same errors like those in the past or letting extremists to hijack any a cause, no matter how genuine, might betray a myopic vision of the issues at stake. War rhetoric, extremist views and populist movements that only add venom to an already dicey situation have hardly gotten anywhere! They simply help to sell the illusions of a chaotic society that benefits no one. People often forget that problems are easier to begin than to solve. Rationality seems to have been thrown to the dogs and only those appealing to emotions seem to want to take the day. Fortunately, in spite of all else, Anglophones who matter have also publicly opted to take up issues with the powers that be. By Crown Copyright © 2018 Thomson Reuters 11 Déc. 2016 16:54 0 Likes 1/9/23, 1:34 AM Seeking Rational Solutions https://www.cameroon-tribune.cm/article.html/3516/en.html/seeking-rational-solutions 2/2 Negating them and their efforts while counting on instincts, anger and pent-up emotions could seriously jeopardize a noble cause. The gamble that seems to be with the education of the youth in the North West and South West Regions can only produce unfortunate results by further compromising the future of a generation. In addition, the Bishops of the Bamenda Ecclesiastical Province who last week added their voice to the situation carried some salient facts notably that; “It is important to respect the conventions that bind us together as a people. The bicultural nature of our country, which enriches our diversity, should be a treasured commodity that guides our interaction with each other as children of the same fatherland.” Actors in the current situation who stick to their views might doubt this theory from the men of God, but that will for long remain a truism in Cameroon. Lest we forget, the Bishops are equally key actors in the educational system in Cameroon. Consequently, they also stand a better chance not only to voice their opinion, but equally to indicate how best to get out of a stalemate as far as the future of the people, young or old, is concerned.

[https://www.cameroon-tribune.cm/article.html/3516/en.html/seeking-rational-solutions 1/2](https://www.cameroon-tribune.cm/article.html/3516/en.html/seeking-rational-solutions%201/2)

# South West: Calm And Serenity Return To Buea

By Matomba 11 Déc. 2016

Life has been normal in the town since the visit of the Secretary General of the CPDM Central Committee to Buea. Some schools in the town of Buea have gone operational after the upheavals that took place in Buea and Bamenda, which led to the semi closure of certain schools because teachers deserted the classrooms. Most of the schools that are functioning normally are mostly the government secondary schools and primary schools. Apart from the educational sector, the normal day to day live the town used to have is back and it seems nothing ever went wrong. The business places around the town open on a daily basis, markets remain open on their normal days and the population goes in and out to buy various items that they need. Talking to some individuals, they believe dialogue with the government is the beginning of a lasting solution to any of the problems that are being posed. They added that the government must take decisive steps that will bring lasting solutions. Others think that the government should sort out the problems on the table in good faith by telling the Anglophones the truth. Another inhabitant of Buea said politics cannot be mingled with conflicts. This, he said, is in reference to the visits of the chairman of the SDF, Fru Ndi as well as the visit of the CPDM Secretary General, Jean Nkuete. He added that their visits could not handle all the issues because the on-going problems cannot be solved through politics alone. In spite of the calmness of the town, there are allegations made that a certain group in the South West Region wants to continue with the strike to ensure their requests is granted. There have also been some wild rumors going on about the intensions of unidentified persons who want to continue creating fears. In the face of the situation, the Governor of the Region, Bernard Okalia Bilia issued an injunction calling on the population calm and assuring the people that measures have been taken to protect live and property throughout the Region. [https://www.cameroon-tribune.cm/article.html/3514/en.html/south-west-calm-serenity-return-buea 1/1](https://www.cameroon-tribune.cm/article.html/3514/en.html/south-west-calm-serenity-return-buea%201/1)

# Bamenda: Gradual Return To Normalcy

By Erick Maville, Directeur Général De L’association Santé En Entreprise (SEE) 11 Déc. 2016

The weekend featured more commercial activities with reassuring Security Forces around. Unlike recent weeks, Bamenda was busier over the weekend with life virtually returned to the city. The weekend featured more taxis and more Commercial motorcycles on the streets, especially at Commercial Avenue. Most shops that were shot reopened for customers on Saturday December 10, 2016. Motor parks and inter-urban transport Agencies were busy receiving and dispatching some passengers returning from the plantations in the South West region to spend end-of-year feasts with family members in their respective divisions. The rush for food items at the City’s markets was evident. On most lips were prayers for things to completely return to normal. Meanwhile, security forces are prominent at most of the City’s junctions, poised to intervene in their mission to protect people and property and give peace a chance in times like this. Their dissuasive presence also frightens some inhabitants who prefer to stay back home. From his Up Station office, North West Governor, Adolphe Lele Lafrique has been appealing for calm and expressing the concerns of the government to families who suffered deaths, destructions and injuries during the unfortunate Thursday, December 8 , 2016 clashes between security forces and some inhabitants. Governor Adolphe Lele Lafrique told Cameroon Tribune that casualties of the clashes included two deaths, burning of a District Police station, looting, burning and destruction of vehicles and injuries suffered by some civilians and some members of the Forces of Law and Order. The unfortunate events also sent most boarding schools on early holidays. Most parents picked up their children from Sacred Heart College, Our Lady of Lourdes, Baptist High school Mankon etc on December 9th, 2016 while respective school administrators spent the weekend, doing special transportation arrangements for students whose destinations are far away.

[https://www.cameroon-tribune.cm/article.html/3512/en.html/bamenda-gradual-return-normalcy 1/1](https://www.cameroon-tribune.cm/article.html/3512/en.html/bamenda-gradual-return-normalcy%201/1)

# Manifestations à Bamenda et Buea: le Sénat condamne la violence

By 12 Déc. 2016

A la clôture des travaux vendredi dernier, Marcel Niat Njifenji a invité les uns et les autres au respect des symboles de l’Etat. La voix haute et le ton ferme ! Vendredi dernier, le président du Sénat n’a pas fait mystère de son indignation face à certaines dérives observées depuis quelques jours de la part de manifestants qui n’ont pas hésité à s’en prendre à certains symboles de l’Etat. «Le Sénat, par ma voix condamne avec la dernière énergie le comportement de cette horde d’antipatriotes qui, manipulés par des personnes irresponsables et aux desseins ignobles, agressent de paisibles compatriotes, détruisent des infrastructures acquises au prix d’énormes sacrifices et, comble de l’inacceptable, brûlent le drapeau national, symbole irremplaçable de notre identité et de notre fierté ». Face à cette situation, Marcel Niat Njifenji a alors indiqué à l’endroit de ces personnes : « qu’elles sachent que nous ne les laisserons pas faire. Elles ne nous détourneront pas de notre engagement déterminé pour construire un Cameroun de paix. ». Non sans ajouter « n’en déplaise aux cassandres de la déstabilisation, les Camerounais dans leur très grande majorité, sont fiers de leur diversité, jaloux de l’unité et de l’intégrité territoriale de leur pays et fermement attachés à l’indivisibilité de la République ». S’il a exhorté le gouvernement à poursuivre à l’égard des manifestants « la politique de dialogue et de la main tendue, voulue par le président de la République, S.E. Paul Biya », il l’a, en outre, exhorté à « faire preuve de la plus grande fermeté à l’égard de tous ceux qui portent atteinte aux symboles de la République auxquels nous sommes tous attachés ». Pour le reste, Marcel Niat Njifenji, s’est félicité de la collaboration étroite établie entre l’institution qu’il dirige et l’Assemblée nationale, ce qui a selon lui permis à chacune des deux chambres d’épuiser l’agenda législatif « dans le strict respect des délais de la durée constitutionnelle des sessions ». Il a souligné qu’au total, ce sont six projets de loi qui ont été examinés et adoptés au cours des trente jours de travaux. Ceux-ci « ont vocation à relever efficacement certains défis majeurs dans la perspective de l’émergence de notre pays voulue par le président de la République, S.E. Paul Biya, à l’horizon 2035 » a indiqué le président du Sénat. Au rang de ces textes, le projet de loi portant loi de finances de la République du Cameroun pour l’exercice 2017 qui s’élève à la somme de 4 373,8 milliards de F. Au rang des défis qui se posent au Cameroun, Marcel Niat Njifenji a souligné celui de l’investissement public que l’on observe à travers la réalisation du Plan d’urgence triennal. « Je suis heureux de constater une nette amélioration de l’investissement public depuis le début du nouveau triennat », a-t-il souligné.

[https://www.cameroon-tribune.cm/article.html/3557/en.html/manifestations-bamenda-buea-le-senat-condamne-la-violence 1/1](https://www.cameroon-tribune.cm/article.html/3557/en.html/manifestations-bamenda-buea-le-senat-condamne-la-violence%201/1)

# Tension In Bamenda, Buea: Dialogue, Consultation Recommended

**By Aureline MELI (Intern) 11 Déc. 2016**
[truncated: 432,292 more chars]
