# Supplementary material
Source: Research Square preprint supplement (doi:10.21203/rs.3.rs-8545290/v1)
Supplement: Supplementary file 13 [file f6ceea3ec230d5ec9d204da6.docx]

| 1/21/2023 3:45 PM | | | | | | | | | | | | | | | | | |
| --- | --- | --- | --- | --- | --- | --- | --- | --- | --- | --- | --- | --- | --- | --- | --- | --- | --- |
| Coding Summary By Source | | | | | | | | | | | | | | | | | |
| PHD Thesis Coding | | | | | | | | | | | | | | | | | |
| 1/21/2023 3:45 PM | | | | | | | | | | | | | | | | | |
|  | | | **Classification** |  | **Aggregate** |  | **Coverage** |  | **Number Of Coding References** |  | | **Reference Number** |  | **Coded By Initials** |  | **Modified On** |  |
| **Document** | | | | | | | | | | | | | | | | |  |
|  | **Internals\\237 online** | | | | | | | | | | | | | | | |  |
|  | | **Node** | | | | | | | | | | | | | | |  |
|  | | | **Nodes\\Conflict** | | | | | | | | | | | | | |  |
|  |  | No |  | 0.0244 |  | 18 |  | | | | | | |
|  | | |  |  |  |  |  |  |  |  | | | | | | | |
|  | | | | | | | | | | | | 1 |  | CP |  | 12/5/2022 12:56 AM |  |
|  | | | Les 3 vaillants éléments des forces de défense camerounaise ont rendu l’âme, au cours des échanges de coups de feu avec les séparatistes.  L’armée camerounaise en deuil. Celle-ci vient de perdre des éléments. Hier, jeudi 26 novembre 2020, trois hommes appartenant au 21ème bataillon des fusillés marins ont perdu leurs vies, après avoir succombé à leurs blessures respectives. Ces derniers ont été grièvement été blessés par balle dans une embuscade tendue par des séparatistes. Les faits se sont déroulés dans la commune d’Ekondo Titi (département du Ndian, région du Sud-Ouest). | | | | | | | | | | | | | |  |
|  | | |  | | | | | | | | | | | | | |  |
|  | | | | | | | | | | | | 2 |  | CP |  | 12/5/2022 1:00 AM |  |
|  | | | Le coup de filet est le fruit d’une collaboration en parfaite synergie entre la gendarmerie de légion du Nord-Ouest et la population de la commune de Widikum (département de la Momo). « C’est l’occasion pour nous de saluer cette collaboration naissante et forte avec la population qui ne ménage plus aucun effort », déclare le commandant de la légion de gendarmerie de cette partie du pays. | | | | | | | | | | | | | |  |
|  | | |  | | | | | | | | | | | | | |  |
|  | | | | | | | | | | | | 3 |  | CP |  | 12/5/2022 1:06 AM |  |
|  | | | L’Armée camerounaise a repris le contrôle de la route Oku – Kumbo ( région du Nord-Ouest Cameroun), aux combattants séparatistes anglophones, après deux ans de blocus par ces derniers.  La route Oku- Kumbo est à nouveau réouverte à la circulation. Cela n’avait plus été le cas depuis deux ans. Cette voie de communication, était bloquée par les miliciens séparatistes anglophones, lesquels y avaient fait des tranchées de part et d’autre.  Selon des informations émanant des sources sécuritaires, 500 militaires qu’appuyaient 40 véhicules de combat, ont investi la susdite localité ce week-end, mettant fin à la barbarie des miliciens séparatistes. Concrètement, l’on apprend qu’une dizaine de combattants séparatistes a trouvé la mort, des camps d’entraînement détruits.  La route Oku- Kumbo est désormais libérée par l’Armée camerounaise. | | | | | | | | | | | | | |  |
|  | | |  |
|  | | |  | | | | | | | | | | | | | |  |
|  | | | | | | | | | | | | 4 |  | CP |  | 12/5/2022 1:11 AM |  |
|  | | | Les forces de défense viennent de neutraliser plusieurs combattants séparatistes, et détruit leur camp dans le Nord-Ouest.  L’armée camerounaise a engagé il y a 2 semaines une opération militaire d’envergure dans un camp de séparatistes dans l’arrondissement de Ndop, département du Ngo-Lituba (région du Nord-Ouest). Le camp en question est situé sur les bords du lac Babalang, à quelques kilomètres des départements du Noun et des Bamboutos dans la région de l’Ouest. Des sources militaires indiquent « plusieurs terroristes neutralisés » sans en préciser le nombre. L’armées a également découvert des armes et des munitions au cours de cette opération. « Cela a été une action très réussie, nous avons attaqué un camp des séparatistes et l’avons détruit », témoigne une source sécuritaire. Cette opération musclée de l’armée camerounaise rentre, renseigne-t-on, dans le cadre de l’opération de « ratissage de la zone » après l’attaque armée de la localité de Galim. En effet, la ville de Galim, dans le département des Bamboutos, région de l’Ouest, a été attaquée dans la nuit du 07 Mars 2020. Des assaillants lourdement armés sont entrés dans la ville, et ont attaqué la brigade territoriale de gendarmerie et le poste de sécurité publique. Sur le carreau, quatre éléments des forces de sécurité sont tombés, selon le gouvernement.  Offensive éclair | | | | | | | | | | | | | |  |
|  | | |  |
|  | | |  | | | | | | | | | | | | | |  |
|  | | | | | | | | | | | | | | | | | |
| Reports\\Coding Summary By Source Report | | | | | | | | | | | Page 1 of 146 | | | | | | |
| 1/21/2023 3:45 PM | | | | | | | | | | | | | | | | | |
|  | | | **Classification** |  | **Aggregate** |  | **Coverage** |  | **Number Of Coding References** |  | | **Reference Number** |  | **Coded By Initials** |  | **Modified On** |  |
|  | | | | | | | | | | | | | | | | | |
|  | | | | | | | | | | | | 5 |  | CP |  | 12/5/2022 2:10 AM |  |
|  | | | NGALA Elvis c’est son nom.  Gardien de la paix de 2e grade, Il est tombé hier 15 août 2019 dans la soirée à mile 90 à Bamenda suite à une attaque de la patrouille à laquelle il participait, par des forces indépendantistes anglophones, nous confie une source policière.  D’après les témoignages de certaine personnes, plusieurs hôtels dans les ville de Buea, Mutenguene et Kumba sont envahis par les militaires vêtus en civil.  Rappelons que la crise socio-politique anglophone fait déjà, depuis 3 ans qu’elle dure fait environ 2 000 morts et des milliers de déplacés internes et externes. | | | | | | | | | | | | | |  |
|  | | |  |
|  | | |  | | | | | | | | | | | | | |  |
|  | | | | | | | | | | | | 6 |  | CP |  | 12/5/2022 2:15 AM |  |
|  | | | L’officier du BIR, Nsangou Salim a été tué ce jeudi 4 juillet par des combattants séparatistes à Bamenda dans la région du Nord-Ouest. Selon des informations, l’officier du Bataillon d’Intervention Rapide a été assassiné devant son épouse et ses enfants.  Votre journal a appris avec consternation, l’assassinat hier jeudi 04 juillet 2019, d’un officier de l’Armée camerounaise.  L’officier du Bir Nsangou Salim, a été tué par de présumés séparatistes, en présence de son épouse ( voir photo du couple), et de ses enfants, et ce, à Bamenda, dans la région du Nord-Ouest du Cameroun.  Pour le moment, les circonstances de cette fin de vie tragique et choquante de l’officier, demeurent encore voilées.  Aucune communication n’a encore été faite à ce sujet, par le gouvernement camerounais. | | | | | | | | | | | | | |  |
|  | | |  |
|  | | |  | | | | | | | | | | | | | |  |
|  | | | | | | | | | | | | 7 |  | CP |  | 12/5/2022 11:32 PM |  |
|  | | | Le ministre de la Défense informe que les militaires ont été pris au piège par des séparatistes au lieu-dit Alachu/Bafut, dans la capitale régionale du Nord-Ouest.  Des pertes dans les rangs de l’armée camerounaise. Dans un communiqué publié le 16 mai 2019, le ministre de la Défense (MINDEF) indique que «dans la mi-journée du mercredi 15 mai 2019, deux soldats roulant à motocyclette dans la ville de Bamenda, ont été sauvagement et lâchement assassinés par des terroristes sécessionnistes, embusqués dans les habitations au lieu-dit Alachu/Bafut».  Sans donner d’informations sur les identités des militaires tués, Joseph Beti Assomo renseigne que «la descente immédiate d’une équipe d’intervention avec pour mission de boucler et ratisser la zone, s’est soldée par un échange de de coups de feu avec les terroristes qui ont tenté de prendre la fuite». C’est à ce moment qu’un incident s’est produit.  «Les militaires lancés à leur poursuite ont été pris à partie par de nombreuses personnes non identifiées et violentes. La confusion a provoqué des échauffourées avec destructions des biens et incendie de quelques maisons», informe le MINDEF. «Une enquête a été ouverte pour faire toute la lumière sur cette affaire et déterminer les auteurs des destructions de biens ayant provoqué un réel préjudice à leurs propriétaires. Les coupables identifiés répondront de leurs actes conformément à la loi», promet-il.  Ces incidents interviennent une semaine après le passage du Premier Ministre dans la capitale régionale du Nord-Ouest. Joseph Dion Ngute qui a passé le message de paix du Président de la République, désormais disposé à dialoguer avec les séparatistes de tous les sujets, à l’exception de la sécession. La preuve donc que le chemin de sortie de crise est encore long. | | | | | | | | | | | | | |  |
|  | | |  |
|  | | |  |
|  | | |  | | | | | | | | | | | | | |  |
|  | | | | | | | | | | | | 8 |  | CP |  | 12/6/2022 12:16 AM |  |
|  | | | Les concernés ont été tués à la suite de l’attaque du poste avancé de Dibunda, dans le Sud-Ouest, samedi dernier. Du matériel militaire a été récupéré sur place.  La marine camerounaise a tué dix-sept combattants sécessionnistes dimanche à Dibunda (département du Ndian, région du Sud-Ouest), dans le cadre d’une opération de riposte.  Les combattants tués faisaient partie de la milice séparatiste dénommée Forces de défense de «l’Ambazonie» (Afd), dont des membres ont attaqué le poste avancé de Dibunda, dimanche.  L’attaque est survenue au cours du ravitaillement du poste militaire d’Isangele, à la sortie de la ville de Mudemba. Trois militaires ont été blessés. Ils ont été transférés à Limbe et Buea. L’un des soldats a été évacué à Douala où il a subi une amputation du bras.  Le transport des victimes vers des formations hospitalières s’est fait par voie maritime, a-t-on appris auprès des sources sécuritaires. Et pour cause, la route Mudemba-Ekondo Titi-Kumba est encore contrôlée par les sécessionnistes.  L’armée a immédiatement lancé une opération de riposte qui s’est soldée par la destruction d’un camp séparatiste en brousse. Les militaires ont récupéré sur place quatre fusils de chasse, une moto, trois groupes électrogènes, onze matelas, des tenues militaires, un drapeau «ambazonien» et un autre portant les symboles de l’Afd. | | | | | | | | | | | | | |  |
|  | | |  |
|  | | |  | | | | | | | | | | | | | |  |
|  | | | | | | | | | | | | | | | | | |
|  | | | | | | | | | | | | | | | | | |
| Reports\\Coding Summary By Source Report | | | | | | | | | | | Page 2 of 146 | | | | | | |
| 1/21/2023 3:45 PM | | | | | | | | | | | | | | | | | |
|  | | | **Classification** |  | **Aggregate** |  | **Coverage** |  | **Number Of Coding References** |  | | **Reference Number** |  | **Coded By Initials** |  | **Modified On** |  |
|  | | | | | | | | | | | | | | | | | |
|  | | | | | | | | | | | | 9 |  | CP |  | 12/6/2022 12:40 AM |  |
|  | | | Des combats meurtriers ont eu lieu le 30 avril entre l’armée et les séparatistes à Wum dans le département de Menchum.  Ces derniers jours ont été marqués dans les régions anglophones, par de violents combats entre l’armée et les milices qui mènent la lutte armée pour la sécession. Ces affrontements ont été particulièrement meurtriers le 30 avril 2019 dans la ville de Wum.  L’armée a en effet, pris d’assaut un camp dans lequel se trouvaient les combattants séparatistes dans cette ville, chef-lieu du département de Menchum, dans le Nord-Ouest. Des échanges de tirs ont eu lieu et selon des sources sécuritaires, plusieurs sécessionnistes ont été tués. Côté armée, au moins quatre éléments ont perdu la vie.  Depuis plusieurs jours, un regain de violence est observé dans la crise sociopolitique qui secoue les régions du Nord-Ouest et du Sud-Ouest. Surtout, vis-à-vis des forces de défense et de sécurité qui mènent la lutte contre les bandes armées pro séparatistes. Dans la matinée du 28 avril, le commissaire de police David Asoh a été abattu à Sabongari, localité située dans le département du Donga Mantung au Nord-Ouest.  En l’espace d’une semaine, deux hommes en tenue ont été tués et décapités. Il s’agit du gendarme Adam Assana, tué à Muyuka au Sud-Ouest et du soldat Arthur Banka Tah, assassiné à Wum. Des atrocités condamnées par l’ambassadeur des Etats-Unis au Cameroun, Peter Henri Barlerin. Le diplomate américain en a profité pour réitérer l’appel au cessez-feu et à l’instauration d’un dialogue inclusif. | | | | | | | | | | | | | |  |
|  | | |  |
|  | | |  | | | | | | | | | | | | | |  |
|  | | | | | | | | | | | | 10 |  | CP |  | 12/6/2022 12:54 AM |  |
|  | | | Le corps d’un homme non identifié et vêtu d’une tenue militaire a été découvert samedi matin à Bambui, dans le nord-ouest du Cameroun.  Les habitants disent que ce corps retrouvé aurait été jeté là par des combattants présumés séparatistes.  Ils ajoutent que des coups de feu ont été entendus vendredi soir lors des affrontements intenses entre force de sécurité et combattants séparatistes.  Selon certaines sources, le corps retrouvé aurait résulté de cet affrontement. Mais l’armée n’a pas encore annoncé ni confirmé la perte d’élément dans la région. | | | | | | | | | | | | | |  |
|  | | |  |
|  | | |  | | | | | | | | | | | | | |  |
|  | | | | | | | | | | | | 11 |  | CP |  | 12/6/2022 12:55 AM |  |
|  | | | Les hommes armés actifs dans la région du Nord-ouest avaient fait du Lycée technique de Kumbo une de leurs bases.  Dans une « note d’information », des détails sont apportés sur l’attaque du 4 avril à Melouf, un quartier de Kumo, région du Nord-ouest du Cameroun.  « En effet, le 4 avril dernier, une Force constituée des éléments de la gendarmerie et de la police, a mené une opération sur la base des renseignements reçus de la population, contre une base de retranchement d’une bande de terroristes qui s’étaient installés au Lycée Technique de Kumbo, après en avoir interdit l’accès aux élèves », apprend –on de ce document.  L’on peut également y lire que « la force, qui s’est retrouvée coincée par les tirs de l’ennemi qui avait reçu du renfort des bases voisines, a été soutenue par le détachement du BIR stationné dans la ville, dont le rôle principal a été de dégager les barricades et refermer les tranchées creusées à plusieurs endroits sur la route ».  Bilan des courses « 4 terroristes neutralisés, 10 armes de traite récupérées, 18 munitions de calibre 12 récupérées, un stock de gris-gris détruit ». | | | | | | | | | | | | | |  |
|  | | |  |
|  | | |  | | | | | | | | | | | | | |  |
|  | | | | | | | | | | | | 12 |  | CP |  | 12/6/2022 1:01 AM |  |
|  | | | L’armée camerounaise a neutralisé sept assaillants au cours d’une « opération de reconnaissance offensive » samedi à Alabukam, près de Bamenda, chef-lieu de la région anglophone du Nord-Ouest, a-t-on appris de sources proches des forces de défense.  L’opération a permis la destruction d’un camp de combattants sécessionnistes et la récupération d’armes légères, de munitions, d’uniformes militaires et de moyens de transport comme des motocyclettes, ont indiqué les mêmes sources à l’AFP.  Cette offensive survient après des appels au cessez-le-feu lancés par le président Paul Biya en novembre et décembre derniers.  Début décembre, Yaoundé a mis en place un programme de désarmement dans toutes ses zones en conflit avec un comité national de désarmement, de démobilisation et de réintégration (CNDDR) pour les combattants.  Les leaders officiels des organisations sécessionnistes, arrêtés début 2018 au Nigeria et dont le procès à Yaoundé a été renvoyé au 7 février, n’ont pas répondu à cette offre.  « Si l’appel à déposer les armes que j’ai lancé aux entrepreneurs de guerre reste sans réponse, les forces de défense et de sécurité recevront instruction de les neutraliser », avait déclaré M. Biya en présentant ses voeux le 31 décembre. | | | | | | | | | | | | | |  |
|  | | |  |
|  | | |  | | | | | | | | | | | | | |  |
|  | | | | | | | | | | | | | | | | | |
|  | | | | | | | | | | | | | | | | | |
| Reports\\Coding Summary By Source Report | | | | | | | | | | | Page 3 of 146 | | | | | | |
| 1/21/2023 3:45 PM | | | | | | | | | | | | | | | | | |
|  | | | **Classification** |  | **Aggregate** |  | **Coverage** |  | **Number Of Coding References** |  | | **Reference Number** |  | **Coded By Initials** |  | **Modified On** |  |
|  | | | | | | | | | | | | | | | | | |
|  | | | | | | | | | | | | 13 |  | CP |  | 12/6/2022 1:02 AM |  |
|  | | | Au moins 20 séparatistes armés ont été neutralisés par les éléments du 52 Bataillon d’Infanterie Motorisée (BRIM) sur l’axe de Sabongari et Nkambe, région du Nord-ouest.  Selon nos informations, une patrouille de la 52e BRIM de Nkambe, en opération militaire chemin est tombée sur des séparatistes armés sur l’axe Sabongari-Nkambe.  « Les séparatistes ont ouvert le feu en premier sur nos éléments qui ont riposté, une vingtaine de terroristes ont été tués », confie une source militaire.  Dans son message à la nation du 31 décembre, le président Biya a promis de neutraliser tous les séparatistes qui n’accepteraient pas son appel à déposer les armes, « si l’appel à déposer les armes que j’ai lancé aux entrepreneurs de guerre reste sans réponse, les forces de défense et de sécurité recevront instruction de les neutraliser», déclarait le chef d’Etat camerounais.  Ayuk Tabe  Le leader séparatiste, Ayuk Tabe et 9 de ses coaccusés arrêtés en janvier 2018 et dont le procès a été ouvert le 6 décembre dernier sont jugés au tribunal militaire de Yaoundé pour « actes de terrorisme », « hostilité contre la patrie » et « atteinte à la sûreté intérieure et extérieure ».  La deuxième audience de leur procès a eu lieu le 10 janvier. Les leaders séparatistes qui contestent la nationalité camerounaise devant le tribunal, risquent la peine de mort. | | | | | | | | | | | | | |  |
|  | | |  |
|  | | |  |
|  | | |  | | | | | | | | | | | | | |  |
|  | | | | | | | | | | | | 14 |  | CP |  | 12/6/2022 1:13 AM |  |
|  | | | Au moins 23 séparatistes armés que Yaoundé qualifie de « terroristes », ont été tués entre jeudi et vendredi par les forces de défense et de sécurité dans plusieurs affrontements, a-t-on appris de source sécuritaire autorisée.  A Ndop, dans le département du Ngo-Ketundja, région du Nord-ouest, dix-sept séparatistes ont été tués et deux autres capturés ce jeudi. Des engins roulants, des appareils de communication ainsi que des armes et munitions ont été saisis jeudi lors d’une opération de l’armée.  « Les séparatistes ont ouvert le feu au moment où les forces de sécurité leur demandaient de se rendre. Ceux qui se sont rendus ont été capturés. Ils sont en cours d’exploitation », déclare le Colonel chef de la division Communication au ministère de la défense.  Dans le même temps, cinq séparatistes ont été tués dans la petite localité de Moudoum à 35 km de Bafut, région du Nord-ouest.  Les régions du Nord-ouest et du Sud-ouest, majoritairement peuplées des camerounais d’expression anglaise sont secouées depuis fin octobre 2016 par des revendications sociopolitiques qui ont débouché sur des affrontements entre forces de défense et de sécurité et gangs armés revendiquant la sécession du Cameroun.  Selon des avocats, le domicile de John Fru Ndi chef du SDF, principal parti de l’opposition parlementaire a été incendié par des individus non identifiés.  « Sa sœur a été enlevée, on n’ignore où elle se trouve », ont poursuivi les avocats du SDF devant le conseil constitutionnel.  Ces avocats plaidaient pour l’annulation totale du scrutin indiquant que dans les deux régions du | | | | | | | | | | | | | |  |
|  | | |  |
|  | | |  |
|  | | |  | | | | | | | | | | | | | |  |
|  | | | | | | | | | | | | 15 |  | CP |  | 12/6/2022 2:02 AM |  |
|  | | | Durant sa contre-offensive dans le but de protéger la vie du ministre Joseph Beti Assomo, les militaires camerounais ont abattu au moins six rebelles sécessionnistes.  Les faits donnent raison à ceux qui ont pensé qu’un voyage du Ministre délégué à la présidence, chargé de la défense en zone de guerre dans la Région du Sud-Ouest était risqué.  Dépêché en urgence par le président de la République, chef des armées, le ministre Joseph Beti Assomo a débarqué en hélicoptère en fin de matinée de ce jeudi 12 juillet 2018 à Kumba, chef-lieu du département de la MEME.  Selon nos sources, le ministre de la défense avait pour mission de réactiver le moral des troupes de l’armée camerounaise qui serait au plus bas à la suite des épreuves tragiques vécues ces dernières 72 heures. Les mêmes sources indiquent que le parton délégué de l’armée camerounaise s’est rendu également au front pour procéder à l’installation solennelle d’un nouveau poste de commandement des opérations à Small Ekombe, une localité de l’arrondissement de Mbonge.  Le déploiement du ministre sur le terrain n’a pas été une sinécure. « La venue du Ministre de la défense est considérée par les sécessionnistes comme un défi, Pour nous qui vivons ici, le département de la MEME est presque contrôlé par les rebelles. Ils estiment donc que la présence d’un haut membre du gouvernement central dans cette localité est un affront » explique une élite de Kumba joint au téléphone.  Ainsi, les rebelles ont lancé une offensive contre le convoi du Ministre sur la route de Mbonge. Les éléments des forces de défense et de sécurité ont immédiatement riposté.  « Patrouille de balayage venant au contact du Convoi Mindef a été freinée par irrédentistes. Réaction fulgurante, 6 sécessionnistes neutralisés. Mindef ordonné poursuite mission » a expliqué le Colonel Didier Badjeck, chef de Division du Ministère de la défense,  Si les hôtes venus de Yaoundé ont tenu à aller au bout de leur mission, l’on note que cette visite a été sérieusement perturbée et ensanglantée. En dehors des six sécessionnistes abattus, quelques membres de la suite officielle du ministre de la défense ont été grièvement blessés.  Parmi les blessés admis à l’hôpital militaire de Douala, figure notre confrère Grégoire Djarmaila en service au journal gouvernemental Cameroon-Tribune.  Le bilan officiel de cette attaque n’est pas disponible au moment de mettre cet article en ligne.  Depuis le début de cette semaine, les Forces de défense et de sécurité ont perdu plusieurs éléments dans de violents combats contre des terroristes sécessionnistes dans la Région du Sud-Ouest.  https://www.237online.com/cameroun-crise-anglophone-des-secessionnistes-attaquent-le-convoi | | | | | | | | | | | | | |  |
|  | | |  |
|  | | |  |
|  | | |  |
|  | | |  | | | | | | | | | | | | | |  |
| Reports\\Coding Summary By Source Report | | | | | | | | | | | Page 4 of 146 | | | | | | |
| 1/21/2023 3:45 PM | | | | | | | | | | | | | | | | | |
|  | | | **Classification** |  | **Aggregate** |  | **Coverage** |  | **Number Of Coding References** |  | | **Reference Number** |  | **Coded By Initials** |  | **Modified On** |  |
|  | | | | | | | | | | | | | | | | | |
|  | | | | | | | | | | | | 16 |  | CP |  | 12/6/2022 2:04 AM |  |
|  | | | Pris dans une embuscade de week-end, des gendarmes ont échangé des tirs avec des séparatistes ; ils ont éliminé quelque 6 d’entre eux en perdant un des leurs.  L’une des 07 victimes de ces altercations est un gendarme qui officiait dans la patrouille opérationnelle. Son corps sans vie a été retrouvé dans les maquis, à coté de 6 autres, par ses collègues en mission de soutien. Comme l’a rapporté le Col. Didier BADJECK, communicant du Ministère de la défense, ce soldat était d’une escorte d’éléments de la gendarmerie d’Andek cheminant avec quelques-uns du Bataillon troupes aéroportées (BTAP) de Koutaba à bord d’un Pick-up qui ont été surpris par un guet-apens est tombée des sécessionnistes à Tuguy, près de Mbengwi dans le département de la Momo. Outre l’unique mort enregistré chez les soldats, cinq | | | | | | | | | | | | | |  |
|  | | |  |
|  | | |  | | | | | | | | | | | | | |  |
|  | | | | | | | | | | | | 17 |  | CP |  | 12/7/2022 12:38 AM |  |
|  | | | Deux groupes d’individus se sont battus dans la soirée de jeudi, sans qu’aucune perte en vie humaine ne soit enregistrée.  Deux groupes de sécessionnistes se sont affrontés jeudi, 1er février, à Kwa-Kwa dans la région du Sud-Ouest, a-t-on appris, de sources concordantes, ce vendredi.  Les bandes en question sont opposées sur l’orientation à donner au combat. Selon certaines sources, l’un des groupes souhaiterait abandonner les hostilités engagées en vue de la création d’un Etat d’Ambazonie sur le territoire camerounais couvrant les régions du Sud-Ouest et du Nord-Ouest. L’autre groupe, lui, reste dévoué à la cause séparatiste, tous les moyens aidant.  Il est difficile d’affirmer, ce vendredi, si des personnes sont mortes durant les échanges de coups de feu. Des sources confient cependant que des blessés ont été enregistrés de part et d’autre et que quelques voitures de civils ont été incendiées. | | | | | | | | | | | | | |  |
|  | | |  |
|  | | |  | | | | | | | | | | | | | |  |
|  | | | | | | | | | | | | 18 |  | CP |  | 12/7/2022 12:48 AM |  |
|  | | | Selon les premières indications, le gendarme major Bienvenu Djonghay était en détachement dans le Nord-Ouest, comme nombre de ses camarades. Lundi, peu après 9h, le gendarme venu de Bafoussam participait à une chasse lancée pour attraper des individus qui se sont attaqués aux élèves du lycée de Jakiri. Les assaillants l’ont encerclé et, avec sa propre arme, ils l’ont atteint de cinq coups mortels. Par la suite, ils ont fondu dans la nature. | | | | | | | | | | | | | |  |
|  | | |  | | | | | | | | | | | | | |  |
|  | | | **Nodes\\Economic Consequence** | | | | | | | | | | | | | |  |
|  |  | No |  | 0.0215 |  | 10 |  | | | | | | |
|  | | |  |  |  |  |  |  |  |  | | | | | | | |
|  | | | | | | | | | | | | 1 |  | CP |  | 12/5/2022 2:13 AM |  |
|  | | | L’avocat Ayah Paul Abine, ancien candidat à la présidence, a convenu avec le leader de la ‘révolution Coffin’, Mancho Bibixy Tse, qu’il n’y avait pas de plus noble cause que de faire campagne pour que les enfants retournent à l’école.  L’ancien député du RDPC a fait une sortie sur Facebook le lundi 8 juillet 2019 pour joindre sa voix à celle de Mancho emprisonné.  « Mancho Bibixy avait lancé une campagne en faveur du retour à l’école des enfants en septembre prochain. Il ne peut y avoir de cause plus noble! MAIS il reste un motif de préoccupation majeur.  Il est vrai que des images d’enfants braqués à l’école dans plusieurs pays déchirés par la guerre, notamment en Syrie, ont été vus. En outre, il est de notoriété publique que nous sommes ce que nous sommes aujourd’hui, principalement en raison de l’acquisition de connaissances issues de l’éducation formelle. Par conséquent, même les plus malhonnêtes ne douteraient pas que l’éducation formelle est primordiale pour la réussite dans la vie. | | | | | | | | | | | | | |  |
|  | | |  |
|  | | |  | | | | | | | | | | | | | |  |
|  | | | | | | | | | | | | 2 |  | CP |  | 12/5/2022 2:23 AM |  |
|  | | | Bibixy a dénoncé la lenteur du développement économique et structurel de la ville, déclarant qu’il était prêt à mourir tout en protestant contre la marginalisation sociale et économique des personnes anglophones dans cet État francophone hégémonique.  Selon le professeur d’histoire, les journalistes, alors que les troubles dans les régions du Nord-Ouest et du Sud-Ouest du Cameroun montent en flèche, les riches ont déplacé leurs enfants dans des zones plus sûres pour étudier tandis que les pauvres en paient le prix. | | | | | | | | | | | | | |  |
|  | | |  | | | | | | | | | | | | | |  |
|  | | | | | | | | | | | | 3 |  | CP |  | 12/5/2022 2:26 AM |  |
|  | | | Le manque à gagner en termes de chiffres d’affaires est estimé à 269,056 milliards FCFA dans les secteurs investigués : industries agroalimentaires, agro-industries locales, télécommunications, filière café – cacao, services agricoles et distribution. Près de 8 000 emplois relevant du secteur formel sont aujourd’hui menacés en plus des 6 434 emplois déjà perdus sur les sites en arrêt de production des agro-industries. A ce tableau noir, il importe de mentionner des pertes en vies humaines au rang des forces armées régulières, des enlèvements de civils contre rançons, la chute des exportations et des importations vers le Nigeria, une baisse d’activités qui n’est pas sans conséquences négatives sur les recettes douanières, ainsi que le phénomène de la prostitution qui a pris de l’ampleur dans les villes d’accueil des réfugiés internes. Des centaines de déplacés sans revenus étant désormais obligés de se livrer au commerce du s*e*xe. | | | | | | | | | | | | | |  |
|  | | |  |
|  | | |  | | | | | | | | | | | | | |  |
|  | | | | | | | | | | | | | | | | | |
| Reports\\Coding Summary By Source Report | | | | | | | | | | | Page 5 of 146 | | | | | | |
| 1/21/2023 3:45 PM | | | | | | | | | | | | | | | | | |
|  | | | **Classification** |  | **Aggregate** |  | **Coverage** |  | **Number Of Coding References** |  | | **Reference Number** |  | **Coded By Initials** |  | **Modified On** |  |
|  | | | | | | | | | | | | | | | | | |
|  | | | | | | | | | | | | 4 |  | CP |  | 12/5/2022 2:32 AM |  |
|  | | | Les chiffres contenus dans le rapport de Refugees International sont alarmants. «1,3 million de personnes ayant besoin d’assistance humanitaire, 530 000 personnes déplacées au sein de la population anglophone au Nord-Ouest et au Sud-Ouest, environ 40 écoles détruites dans les régions anglophones, 42 500 enfants n’ont pas eu un accès continu à l’éducation au cours des trois dernières années».  Des statistiques qui selon l’organisme humanitaire indépendant sont niées par le pouvoir en place. «Les autorités camerounaises nient la gravité du déplacement et les besoins humanitaires. Pire, l’armée tout comme les séparatistes restreignent sévèrement la liberté de circulation, empêchant les populations locales d’accéder à leurs terres et à des services de base. Les deux (armée et séparatistes Ndlr) ont également pris des mesures visant à limiter l’accès des travailleurs humanitaires aux populations touchées par le conflit.»  Le rapport intitulé «Déni de crise: Le refus des dirigeants camerounais de reconnaître la crise fait peur aux donateurs» revient sur la guerre des chiffres entre le gouvernement et les Ong depuis le début de la crise «le ministre camerounais de l’Administration territoriale, Paul Atanga Nji, a déclaré que les Ong gonflaient les chiffres et faisaient la promotion de « fausses informations ». Le gouvernement prétend à tort qu’on enregistre seulement 152 000 déplacés dans le pays. L’Onu parle d’au moins 530 000 personnes». | | | | | | | | | | | | | |  |
|  | | |  |
|  | | |  | | | | | | | | | | | | | |  |
|  | | | | | | | | | | | | 5 |  | CP |  | 12/6/2022 12:09 AM |  |
|  | | | Son chiffre d’affaires est passé de 334,9 milliards de Fcfa en 2017 à 314,4 milliards de Fcfa en 2018, soit une baisse d’environ 20 milliards de Fcfa. C’est dans ce contexte difficile que l’assemblée générale des actionnaires de ce groupe va adopter les comptes de cet exercice, le 15 mai prochain à Douala.  Les actionnaires du Groupe Société Anonyme des Brasseries du Cameroun (SABC), de la Société des Eaux minérales du Cameroun (Semc) et de la Société Camerounaise de Verrerie (Socaver) ont rendez-vous le 15 mai prochain, au Castel Hall, sis à Douala. Ce sera, selon une annonce légale parue dans une édition du quotidien à capitaux publics, Cameroon tribune, à l’occasion de l’assemblée générale ordinaire. Une instance qui devra délibérer notamment sur le rapport de gestion du conseil d’administration, le rapport général des commissaires aux comptes. Tout comme il sera aussi question de procéder à l’approbation de l’ajustement du report à nouveau des exercices antérieurs au 1er janvier 2018 ; l’approbation des états financiers de synthèse de l’exercice social clos le 31 décembre 2018 ; l’approbation des états financiers de synthèse consolidé de l’exercice social clos le 31 décembre 2018 ; l’affection du résultat ; la fixation du dividende et de sa mise en paiement, etc. Il faut relever que cette assemblée générale des actionnaires va se tenir dans un contexte difficile, avec les résultats du groupe en deçà des attentes.  En effet, au cours de l’exercice 2018, le Groupe SABC a enregistré en 2018 un chiffre d’affaires TTC de 560,4 milliards de FCFA. Après déduction des ristournes, pour un montant de 28,7 milliards de FCFA, et des taxes, pour 217,3 milliards de FCFA, le chiffre d’affaires HT de l’année 2018 s’est établi à 314,4 milliards de F CFA contre 334,9 milliards en 2017, soit une baisse d’environ 20 milliards de FCFA. Le leader de l’industrie brassicole du pays traverse donc une mauvaise passe. Pourtant, en 2018, précise-t-on, la SABC a enregistré 2 % d’augmentation de ses volumes de vente. Une progression remarquable mais qui reste en retrait par rapport aux perspectives du marché, nettement plus ambitieuses. L’entreprise est en fait entravée par la dégradation du contexte économique depuis 2017 et par l’accroissement du risque sécuritaire. | | | | | | | | | | | | | |  |
|  | | |  |
|  | | |  |
|  | | |  | | | | | | | | | | | | | |  |
|  | | | | | | | | | | | | 6 |  | CP |  | 12/6/2022 1:26 AM |  |
|  | | | Un rapport du Gicam estime le manque à gagner des entreprises à plus de 269 milliards Fcfa et 6434 emplois déjà perdus.  L’opinion avait déjà une petite idée des effets néfastes de la crise anglophone sur l’économie nationale à la lecture de divers articles de presse. Des données plus détaillées sont désormais disponibles dans un rapport du Groupement inter-patronal du Cameroun (Gicam) daté de juillet 2018. Au plan macroéconomique, ce document révèle que plus de 269 milliards Fcfa de chiffre d’affaires se sont envolés et l’on enregistre 2,153 milliards Fcfa de pertes suite à la destruction de biens immobiliers, de matériels roulants et meubles. Dans le même temps, 8000 emplois relevant du secteur formel sont menacés, tandis que 6434 emplois sont déjà définitivement perdus sur les sites en arrêt de production des agro-industries.  Ces données catastrophiques résultent de plusieurs facteurs : les opérations « villes mortes », l’interruption du signal d’internet décidé en janvier 2017 et qui aura duré trois mois, les attaques ciblées contre les structures économiques, ainsi que les menaces, enlèvements, rackets et assassinats des employés et responsables d’entreprises. Le Gicam pointe également un doigt accusateur sur les décisions contre-productives prises par des autorités administratives, notamment la pose de scellés sur certains commerces. Des « actions qui relèvent d’un excès de zèle et même d’un abus d’autorité » puisqu’elles ne reposent sur aucune démarche logique selon le Gicam. | | | | | | | | | | | | | |  |
|  | | |  |
|  | | |  | | | | | | | | | | | | | |  |
|  | | | | | | | | | | | | | | | | | |
|  | | | | | | | | | | | | | | | | | |
| Reports\\Coding Summary By Source Report | | | | | | | | | | | Page 6 of 146 | | | | | | |
| 1/21/2023 3:45 PM | | | | | | | | | | | | | | | | | |
|  | | | **Classification** |  | **Aggregate** |  | **Coverage** |  | **Number Of Coding References** |  | | **Reference Number** |  | **Coded By Initials** |  | **Modified On** |  |
|  | | | | | | | | | | | | | | | | | |
|  | | | | | | | | | | | | 7 |  | CP |  | 12/6/2022 1:51 AM |  |
|  | | | Suite à l’escalade des violences causant des pertes humaines et économiques dans les régions du Nord-Ouest et du Sud-Ouest, depuis octobre 2016, le Groupement inter-patronal du Cameroun (Gicam) a mené une investigation auprès des entreprises opérant dans ces zones.  Les résultats de cette enquête du patronat camerounais, qui sont disponibles depuis le 13 septembre, ont permis de mettre en évidence les conséquences économiques et sociales de l’insécurité qui sévit actuellement dans ces régions.  Des entreprises consultées par le Gicam, 86% d’entre elles affirment que la crise dans ces régions a des répercussions négatives très importantes (50%), et importantes (36%) sur leurs activités. Selon les estimations sommaires réalisées, la crise a déjà coûté 2,153 milliards FCFA en termes de destructions de biens immobiliers, de matériels roulants et meubles.  Le manque à gagner en termes de chiffres d’affaires est estimé à 269,056 milliards FCFA dans les secteurs investigués : industries agroalimentaires, agro-industries locales, télécommunications, filière café – cacao, services agricoles et distribution.  Le Gicam souligne : « Il convient de signaler que le manque à gagner en termes de chiffres pour ces entreprises implique mécaniquement un manque à gagner immédiat de 5,9 milliards FCFA de recettes fiscales pour l’Etat, au titre de l’acompte de l’impôt sur les sociétés [dont le taux est fixé à 2,2% calculé sur le chiffre d’affaires] ».  En termes d’emplois, les pertes sont essentiellement celles des entreprises agro-industrielles. Dans l’ensemble, près de 8 000 emplois relevant du secteur formel sont aujourd’hui menacés en plus des 6 434 emplois déjà perdus sur les sites en arrêt de production des agro-industries.  Le Gicam arrive à la conclusion selon laquelle des mesures de sauvegarde s’imposent pour juguler cette situation. La plus importante est la stabilisation du contexte sécuritaire de manière à stopper la dégradation actuelle et enclencher un processus de retour à la paix dans l’ensemble du pays.  « Il est impératif d’éviter l’extension du climat d’insécurité à d’autres zones et régions du pays ; des cas de braquage d’entreprises par des groupes armés se signalant déjà dans la zone de Bonabéri [à Douala, la capitale économique du pays] », suggère le patronat camerounais.  Sylvain Andzongo | | | | | | | | | | | | | |  |
|  | | |  |
|  | | |  |
|  | | |  |
|  | | |  | | | | | | | | | | | | | |  |
|  | | | | | | | | | | | | 8 |  | CP |  | 12/6/2022 2:01 AM |  |
|  | | | Des hommes non identifiés ont semé le trouble samedi dans cette ville la région du Sud-ouest, hors d’atteinte depuis le début de la crise.  La riposte des forces de l’ordre a permis de neutraliser deux des assaillants.  Le calme est revenu dimanche matin 15 juillet 2018 à Limbé. Les populations ont repeuplé les rues. Les chrétiens se sont rendus aux offices religieux. La quiétude apparente qui se lit sur les visages avait disparu 24 heures plus tôt, lorsque la ville a été prise d’assaut par des hommes armés, non identifiés.  Selon les témoignages, c’est autour de 16 h samedi 14 juillet 2018, que des individus armés de fusils et se déplaçant à bord d’un véhicule ont barré la voie à un camion de la Société anonyme des Brasseries du Cameroun (Sabc), transportant des boissons, au lieu-dit Mile 4, à l’entrée de la ville.  Les assaillants ont intimé l’ordre au conducteur de descendre du camion, avant de mettre le feu au véhicule. Ils ont ensuite pris la fuite en se dirigeant vers l’intérieur de la ville. Les forces de l’ordre, alertées, ont aussitôt ouvert le feu. Une source fait savoir que l’entrée de la ville de Limbé a été bloquée pendant l’échange des coups de feu, probablement pour tenter d’intercepter ces individus, au cas où ils empruntaient le même chemin au retour.  L’intervention des forces de l’ordre a permis de neutraliser deux des assaillants, selon certaines | | | | | | | | | | | | | |  |
|  | | |  |
|  | | |  | | | | | | | | | | | | | |  |
|  | | | | | | | | | | | | | | | | | |
|  | | | | | | | | | | | | | | | | | |
|  | | | | | | | | | | | | | | | | | |
| Reports\\Coding Summary By Source Report | | | | | | | | | | | Page 7 of 146 | | | | | | |
| 1/21/2023 3:45 PM | | | | | | | | | | | | | | | | | |
|  | | | **Classification** |  | **Aggregate** |  | **Coverage** |  | **Number Of Coding References** |  | | **Reference Number** |  | **Coded By Initials** |  | **Modified On** |  |
|  | | | | | | | | | | | | | | | | | |
|  | | | | | | | | | | | | 9 |  | CP |  | 12/6/2022 2:05 AM |  |
|  | | | Le front de l’économie focalise l’attention des journaux camerounais parus mardi, sans pour autant occulter l’interminable guerre sécessionniste dans les régions du Nord-Ouest et du Sud-Ouest.  Quotidien à capitaux publics, Cameroon Tribune se penche sur les nouvelles règles des marchés publics, à la faveur d’un récent décret présidentiel y consacré, avec une nouvelle architecture bâtie dans un contexte où les entreprises publiques ne sont plus assujetties au Code des marchés publics, en termes de passation et de contrôle des marchés en leur sein.  Le texte ainsi révisé, apprend-on, renforce ce que le législateur appelle «principe d’éthique» et durcit les sanctions contre tout acteur coupable d’acte de corruption et autres manœuvres frauduleuses, telles que les manœuvres frauduleuses, les pratiques collusoires obstructives ou coercitives, le délit d’initié ou les conflits d’intérêt.  Dans le même domaine de la gouvernance, Le Quotidien de l’Économie, sous le titre «L’étau se resserre autour des DG des sociétés d’État», plante le décor à la veille d’une assise cruciale à laquelle le ministre des Finances, Louis Paul Motaze, les convie.  Ce sera certainement l’occasion, ose la publication spécialisée, de rappeler à ces gestionnaires souvent indélicats, habitués du gaspillage des biens sociaux, d’être rappelés à l’ordre avant la vague répressive.  Une entreprise anonyme à participation publique qu’InfoMatin appelle à sauver d’urgence, c’est la Société camerounaise des dépôts pétroliers (SCDP), contrôlé à hauteur de 51% par l’État et sans directeur général depuis que son manager, le cumulard Gaston Eloundou Essomba, a été promu ministre de l’Eau et de l’Énergie le 2 mars dernier.  Il se passe, explique le journal, que les deux cadres expatriés qui continuaient tant bien que mal de gérer les affaires courantes, à savoir le directeur général adjoint et le directeur de l’exploitation, sont arrivés en fin de mandat.  Selon des sources dignes de foi, ce sont ces deux responsables, deux maillons forts de l’entreprise dont le remplacement pas encore été pourvu qui, bon an mal an, ont pallié les manquements liés à la démission non formelle, mais bien réelle, du directeur général.  L’autre menace, qui cette fois plane sur les consommateurs et dont se fait l’écho Expression Économique, c’est la hausse annoncée en 2019 des prix de plusieurs denrées de première nécessité (pain, huile de cuisine, riz, etc.) : la circulaire fixant les grandes lignes de la prochaine Loi de finances prévoit la restauration de taxe sur l’importation desdits produits, un phénomène appelé à se répercuter sur le panier de la ménagère. Lire toutes les UNES du jour ici  Quasiment jamais sorti du sujet depuis bientôt trois ans, le quotidien à capitaux privés de langue anglaise The Guardian Post publie un dernier bilan de la guerre sécessionniste dans les régions du Nord-Ouest et du Sud-Ouest : six nouveaux morts dans la localité de Bafut, après des combats entre forces de défense et de sécurités et combattants de la «république d’Ambazonie».  Et comme si cela ne suffisait pas, les insurgés sont allés mettre feu à la tribune de la Place des fêtes de la localité de Foundong, toujours dans la région du Nord-Ouest, et en signe de défiance ont hissé le drapeau indépendantiste devant les bureaux administratifs.  Sur le terrain, s’offusque Aurore Plus, tout, aux yeux du gouvernement qui vient de dévoiler son plan d’urgence humanitaire pour ces régions sinistrées, semble se passer comme si le retour à la paix était une réalité alors que les violences prennent de l’ampleur.  Accusant le président Paul Biya de mettre la charrue avant les bœufs, le bihebdomadaire semble en vouloir particulièrement au ministre de l’Administration territoriale, Paul Atanga Nji, par ailleurs président du comité ad hoc de gestion des quelque 13 milliards FCFA de budget annoncés pour l’opération.  Présenté comme un «repris de justice à la moralité douteuse», celui qui est par ailleurs secrétaire permanent du Conseil national de la sécurité (CNS) est ainsi perçu non seulement dans sa région anglophone d’origine, mais surtout comme «une menace» pour les fonds publics ainsi mobilisés.  Face à la vague de protestations ayant suivi cette désignation controversée, des proches du chef de l’État, renchérit The Guardian Post, conseillent vivement à Paul Biya «de laisser tomber Atanga Nji» qui, plutôt que d’aider à trouver des solutions de sortie de crise, va davantage cristalliser la tension sur le terrain. | | | | | | | | | | | | | |  |
|  | | |  |
|  | | |  |
|  | | |  |
|  | | |  |
|  | | |  |
|  | | |  | | | | | | | | | | | | | |  |
|  | | | | | | | | | | | | 10 |  | CP |  | 12/7/2022 12:59 AM |  |
|  | | | La paralysie des régions du Nord-Ouest et du Sud-Ouest a occasionné des pertes qui se chiffrent à plusieurs milliards de FCFA, selon les premières estimations.  La crise consécutive aux revendications dites « anglophones » a affecté négativement l’économie camerounaise. La paralysie de ces deux régions frontalières avec le Nigeria a considérablement ralenti l’activité économique, notamment les échanges commerciaux, aussi bien à l’intérieur du pays qu’entre le Cameroun et ce pays voisin qui demeure un partenaire de poids. Une étude récente a montré que 1 511 entreprises ont été créées dans ces deux régions depuis 2011. Lorsqu’on y ajoute les autres structures basées dans ces zones, dont la Cameroon developpement corporation (CDC), deuxième employeur après l’Etat, l’on comprend que ces deux régions constituent un vivier d’emplois dont la suspension peut s’avérer préjudiciable au tissu économique. Selon l’économiste Dieudonné Essomba, les régions du Sud-Ouest et du Nord-Ouest jouent un rôle stratégique dans l’économie camerounaise de par leur apport en devises. Par conséquent, toute perturbation d’activité ne peut que conduire à des pertes de devises pour le Cameroun. « Le Sud-ouest est incontestablement la région la plus importante par sa production du pétrole et ses exploitations agroindustrielles telles que la CDC, Pamol, etc. Cette région représente à elle seule pratiquement 45% des recettes en devises », explique Dieudonné Essomba. De manière globale, des opérateurs économiques indiquent qu’un ralentissement des activités est observé à Douala depuis que cette crise a éclaté. « Les activités à | | | | | | | | | | | | | |  |
|  | | |  |
|  | | |  | | | | | | | | | | | | | |  |
|  | | | | | | | | | | | | | | | | | |
| Reports\\Coding Summary By Source Report | | | | | | | | | | | Page 8 of 146 | | | | | | |
| 1/21/2023 3:45 PM | | | | | | | | | | | | | | | | | |
|  | | | **Classification** |  | **Aggregate** |  | **Coverage** |  | **Number Of Coding References** |  | | **Reference Number** |  | **Coded By Initials** |  | **Modified On** |  |
|  | | | **Nodes\\Effects** | | | | | | | | | | | | | |  |
|  |  | No |  | 0.0162 |  | 10 |  | | | | | | |
|  | | |  |  |  |  |  |  |  |  | | | | | | | |
|  | | | | | | | | | | | | 1 |  | CP |  | 12/5/2022 1:06 AM |  |
|  | | | Pinterest  En dépit du climat d’insécurité qui règne dans les deux Régions anglophones du Cameroun où sont concentrés l’essentiel de ses activités, elle a pu exporter 301 tonnes de bananes en juin 2020.  Selon les données de l’Association bananière du Cameroun (ASSIBACAM), La Cameroon Development Corporation (CDC), 2e employeur du pays après l’administration publique, a exporté 301 tonnes de bananes au cours du mois de juin 2020. Toute chose qui marque sa réapparition sur le fichier des exportateurs après dix-neuf mois d’absence. Il est bon de savoir que la CDC est le deuxième employeur camerounais après l’Etat. Mais du fait de l’insécurité créée par les séparatistes anglophones dans les Régions du Nord-Ouest et de Sud-Ouest du Cameroun, les activités de cette importante unité agro-industrielle public étaient en berne depuis plus d’un an.  Aujourd’hui c’est à la grande satisfaction du top management et des employés, ainsi que de l’Etat du Cameroun, que la Cameroon Development Corporation fait son come-back dans la liste des exportateurs. Pour ce retour, la CDC se positionne comme numéro 2 du marché de la banane, derrière la société des Plantations du Haut Penja (PHP), et devant Boh Plantations Plc. | | | | | | | | | | | | | |  |
|  | | |  |
|  | | |  | | | | | | | | | | | | | |  |
|  | | | | | | | | | | | | 2 |  | CP |  | 12/5/2022 1:12 AM |  |
|  | | | Pauline Mafor, âgée de 44 ans, mère de six enfants est une déplacée de la crise anglophone qui s’est installée à Yaoundé et qui vend chaque matin les beignets haricots et bouillies.  La saveur des beignets, haricots, bouillies stimule les papilles gustatives de nombreux jeunes du quartier Ebom à Yaoundé. Maman Pauline, est une déplacée de la crise anglophone qui s’est installée à Yaoundé et qui vend chaque matin les beignets haricots et bouillies. Cet article rend un  vibrant hommage pour le courage et l’abnégation dont elle ne s’est jamais départie depuis déjà trois ans. Elle est une quadragénaire, corpulence moyenne, sur une charpente corporelle de 171cm de hauteur, pour 85 kg. La démarche sûre et lente, elle est à chaque fois couverte d’éloges par ses clients. Madame Pauline Mafor de son nom à l’état civil, est originaire de Kumbo dans la région du Nord-Ouest du Cameroun. Depuis bientôt trois ans, elle a prêté serment auprès de sa propre conscience de donner le meilleur d’elle-même pour que chaque matin, les beignets, haricots et bouillie soient prêts pour le plaisir des habitants de l’arrondissement de Yaoundé III. « Je suis Pauline Mafor, j’ai 44 ans et j’ai six enfants, trois filles et trois garçons. Je suis une déplacée de la crise anglophone. Je me suis installée ici avec ma famille au début de la crise en 2016. J’ai eu beaucoup de chance parce que j’ai ma fille ainée ici à Yaoundé. Elle m’a aidé à m’installer ici. | | | | | | | | | | | | | |  |
|  | | |  |
|  | | |  | | | | | | | | | | | | | |  |
|  | | | | | | | | | | | | 3 |  | CP |  | 12/5/2022 2:24 AM |  |
|  | | | Les chiffres de l’UNICEF sont alarmants «au moins 74 écoles ont été détruites, tandis que les élèves, les enseignants et le personnel scolaire ont été exposés à la violence, aux enlèvements et à l’intimidation », a regretté vendredi le porte-parole du le Fonds des Nations Unies pour l’enfance (UNICEF), Toby Fricker, lors d’un point de presse à Genève.  Depuis trois ans, l’éducation de plus de 600 000 enfants est en péril. En raison de l’interdiction de l’éducation par des groupes armés non étatiques et des attaques, plus de 80 % des écoles ont été fermées, touchant plus de 600 000 enfants, révèle l’organisme onusien. | | | | | | | | | | | | | |  |
|  | | |  | | | | | | | | | | | | | |  |
|  | | | | | | | | | | | | 4 |  | CP |  | 12/5/2022 2:34 AM |  |
|  | | | Le décompte est fait par le Centre for Human Rights and Democracy in Africa dans un récent rapport.  Entre 2017 et 2019, 206 villages ont été brûlés dans les régions du Nord-ouest et du Sud-ouest du Cameroun. C’est ce que rapporte le Centre for Human Rights and Democracy in Africa (CHRDA), dans un rapport récemment rendu public.  Dans ce décompte, l’Ong rapporte que dans la région du Nord-ouest, 107 villages ont été réduits en cendres, pour 99 villages dans la région du Sud-ouest.  Dans ces chiffres, l’on note que 134 villages ont été « sévèrement affectés », autrement dit une destruction complète du village. 57 villages ont été partiellement affectés avec incendie de maison et destruction de bien ; et 15 ont connu des dommages encore moindres.  Depuis 2017, les régions anglophones se sont soulevées contre le pouvoir central dans ce qui s’est transformé en guerre civile entre militaires et indépendantistes armés. L’armée est régulièrement accusée de pratiquer la tactique de la terre brulée en incendiant des villages | | | | | | | | | | | | | |  |
|  | | |  |
|  | | |  | | | | | | | | | | | | | |  |
|  | | | | | | | | | | | | 5 |  | CP |  | 12/5/2022 11:24 PM |  |
|  | | | hommes et femmes, vivent dans le centre de désarmement, démobilisation et réinsertion de Bamenda. Ces jeunes, dont l’âge varie entre 14 et 25 ans, ont combattu dans les rangs des Ambas, le nom donné aux séparatistes armés . Outre la lutte pour la création d’un Etat indépendant, Nkeng Florence, une ex-combattante, mère de deux enfants, dit avoir pris les armes contre son pays, après l’incendie de sa boutique. | | | | | | | | | | | | | |  |
|  | | |  | | | | | | | | | | | | | |  |
|  | | | | | | | | | | | | | | | | | |
| Reports\\Coding Summary By Source Report | | | | | | | | | | | Page 9 of 146 | | | | | | |
| 1/21/2023 3:45 PM | | | | | | | | | | | | | | | | | |
|  | | | **Classification** |  | **Aggregate** |  | **Coverage** |  | **Number Of Coding References** |  | | **Reference Number** |  | **Coded By Initials** |  | **Modified On** |  |
|  | | | | | | | | | | | | | | | | | |
|  | | | | | | | | | | | | 6 |  | CP |  | 12/6/2022 12:15 AM |  |
|  | | | Ces Camerounais désormais en chômage, font partie des victimes de la crise sociopolitique qui sévit dans les régions du Nord-Ouest et Sud-Ouest.  La crise socio-politique qui sévit depuis près de trois ans, dans les régions du Nord-Ouest et Sud-Ouest, a des conséquences néfastes dans le secteur socio-économique camerounais et principalement dans les deux régions touchées. Lors de la célébration de la 133e fête du travail, le 1er mai dernier, le délégué régional du ministère du Travail et de la Sécurité Sociale de la région du Nord-Ouest, a dressé un bilan plutôt déplorable de la situation socio-économique dans cette zone. En effet, selon le délégué, près de 4000 employés ont été contraints au chômage à cause des tensions socio-politiques. Lors du défilé, une quinzaine d’entreprises seulement, sur les 100 enregistrées dans la ville de Bamenda ont participé à la parade. | | | | | | | | | | | | | |  |
|  | | |  |
|  | | |  | | | | | | | | | | | | | |  |
|  | | | | | | | | | | | | 7 |  | CP |  | 12/6/2022 1:11 AM |  |
|  | | | Selon un récent Rapport du Haut-Commissariat pour les Réfugiés, près de 600 personnes en situation de détresse ont rejoint les camps des déplacés au cours des deux dernières semaines.  La crise anglophone envoie chaque jour sur les chemins de l’exil des milliers de réfugiés fuyant la guerre qui fait rage entre les combattants  sécessionnistes et les soldats de l’armée régulière. La situation de ces personnes déplacées dont le nombre ne cesse de s’accroître au fil des jours tant à l’intérieur qu’à l’extérieur du pays préoccupe au plus haut point le Haut-Commissariat pour les Réfugiés.  Au cours de ces deux dernières semaines, l’afflux massif des populations du Nord-ouest et du Sud-ouest du fait de la recrudescence des violences entre les combattants sécessionnistes et les soldats de l’armée régulière a eu pour conséquence immédiate l’arrivée de près de 600 personnes en détresse dans les camps des réfugiés du côté du Nigéria.  Présentant son Rapport sur la situation des déplacés camerounais qui fuient les violences dans le Nord-ouest et le Sud-ouest, le porte-parole du Haut-Commissariat pour les réfugiés (HCR), Babar Baloch, a tiré la sonnette d’alarme. C’était au cours d’une conférence de presse tenue ce 09 novembre 2018 au Palais des Nations à Genève. « Cette semaine, s’inquiète Babar Baloch, le nombre de réfugiés camerounais qui ont fui les violences et trouvé refuge au Nigéria a franchi le seuil des 30 000 personnes. Les réfugiés qui fuient les régions du sud-ouest et du nord-ouest du Cameroun affluent depuis septembre 2017. Ces deux dernières semaines, près de 600 personnes sont arrivées dans les installations de réfugiés », a-t-il déclaré. Selon Babar Baloch, environ 21 000 réfugiés vivent au sein de communautés d’accueil dans 50 localités éparpillées sur 116 000 kilomètres carrés et sont hébergés dans les Etats nigérians d’Akwa Ibom, Cross River, Benue et Taraba, où la plupart sont accueillis au sein des communautés locales. | | | | | | | | | | | | | |  |
|  | | |  |
|  | | |  |
|  | | |  | | | | | | | | | | | | | |  |
|  | | | | | | | | | | | | 8 |  | CP |  | 12/6/2022 1:48 AM |  |
|  | | | Les populations fuient en masse les Régions du Sud-Ouest et Nord-Ouest pour éviter d’être les victimes de l’assaut final annoncé par les séparatistes.  Des colonnes de familles, hommes, femmes et enfants. Bagages au dos, sur les épaules, sur la tête ou dans un porte tout. Direction, les gares routières et autres agences de voyages éparpillées dans différentes localités du Sud-Ouest et du Nord-Ouest, les deux Régions anglophones du Cameroun en proie à une guerre de sécession.  Ces spectacles désolants vécus depuis cette semaine dans la partie occidentale du pays, sont les conséquences des menaces proférées par les sécessionnistes. A travers des tracts et autres moyens de communication, les combattants sécessionnistes ont demandé à la population de partir loin des deux Régions pour ne pas être comptées parmi les victimes de l’assaut final qu’ils vont lancer d’ici la fin de ce mois de septembre 2018 contre les «forces d’occupation», parlant ainsi des Forces de Défense et de Sécurité du gouvernement camerounais.  «Nous ne pouvons plus supporter. C’est grave. Il ne se passe pas un jour sans qu’on ne soit menacé. Malgré les discours des autorités qui vont dans le sens de nous rassurer, la réalité sur le terrain est toute autre chose. Les sécessionnistes assassinent et violent nos proches quand ils veulent et comme ils veulent. Je préfère amener ma famille ailleurs en attendant que la paix revienne» explique Jude Njie, qui a quitté Kumba, avec femme et enfants pour une famille d’accueil au quartier PK 12 à Douala.  Afin de mettre un terme à l’exode massif des populations, le Gouverneur de la Région du Sud-Ouest, Bernard Okalia Bilai, s’est rendu ce samedi 15 septembre 2018 à la gare routière de Mile 17, sise à l’entrée de la ville de Buea, chef-lieu de la Région du Sud-Ouest. Au milieu d’une foule de voyageurs, il a tenté de dissuader les fuyards qui ont décidé d’abandonner leur domicile et certains biens pour des localités sûres. | | | | | | | | | | | | | |  |
|  | | |  |
|  | | |  |
|  | | |  | | | | | | | | | | | | | |  |
|  | | | | | | | | | | | | | | | | | |
|  | | | | | | | | | | | | | | | | | |
| Reports\\Coding Summary By Source Report | | | | | | | | | | | Page 10 of 146 | | | | | | |
| 1/21/2023 3:45 PM | | | | | | | | | | | | | | | | | |
|  | | | **Classification** |  | **Aggregate** |  | **Coverage** |  | **Number Of Coding References** |  | | **Reference Number** |  | **Coded By Initials** |  | **Modified On** |  |
|  | | | | | | | | | | | | | | | | | |
|  | | | | | | | | | | | | 9 |  | CP |  | 12/6/2022 1:54 AM |  |
|  | | | L’accès aux boutiques et magasins du Bamenda Main Market a été refusé aux commerçants la semaine dernière.  Durant la première moitié de la semaine dernière, les activités commerciales ont été bloquées dans la ville de Bamenda. Cette fois, la fermeture n’était plus liée aux villes mortes décrétées par les Ambazoniens mais à une décision administrative. En effet, des éléments des forces armées camerounaises, sur instruction de la plus haute autorité régionale, ont bloqué toutes les entrées du marché principal de Bamenda, empêchant ainsi les commerçants de s’acquitter de leurs tâches quotidiennes.  Après l’observance de la journée-ville fantôme habituelle du lundi 27 août 2018, les commerçants ont été surpris à leur arrivée le mardi de constater que les entrées étaient bloquées. Identique le lendemain mercredi. Le gouverneur leur reproche de continuer à suivre le mot d’ordre antirépublicain alors que les enseignants et les avocats qui les ont précipités dans la grève ont depuis lors jeté l’éponge, et pour beaucoup, repris leurs activités.  Des dirigeants de syndicats de commerçants ont été convoqués à une rencontre de mise au point le mercredi 29 au bureau du gouverneur du Nord-Ouest. Au cours de la réunion qui s’est tenue à huis clos, le Jour a appris qu’ils ont été informés des menaces que l’administration compte mettre à exécution s’ils persistent dans leur entêtement à suivre les injonctions des sécessionnistes.  Le marché a été rouvert mais les commerçants redoutent les mesures de rétorsion que les rebelles pourraient à leur tour prendre à l’endroit des récalcitrants et ce, malgré tout le déploiement sécuritaire envisagé. Ici, l’on rappelle les incendies ciblés dans ces marchés, contre des commerçants qui tout en fermant boutique, jonglaient avec le mot d’ordre de paralysie économique. On attend ce jour, lundi 3 septembre 2018 avec la rentrée scolaire 2018/2019, pour savoir si les menaces de l’autorité administrative vont changer la donne. Des écoles ont été incendiées pour réduire les chances de redémarrage. Déjà l’on craint une escalade chez les rebelles car « Bamenda n’est pas Buéa ».  En mémoire de ce qui est arrivé à Paul Atanga Nji, lorsqu’il n’était pas encore Ministre de l’Administration territoriale, l’on explique que le bouillant maire du chef-lieu du Sud-Ouest | | | | | | | | | | | | | |  |
|  | | |  |
|  | | |  |
|  | | |  | | | | | | | | | | | | | |  |
|  | | | | | | | | | | | | 10 |  | CP |  | 12/7/2022 12:33 AM |  |
|  | | | La région vit dans la peur malgré les multiples couvre-feux.  Le gouverneur de la région du Nord-Ouest, Adolphe Lélé Lafrique, a pris une décision ce 18 février 2018 de prolonger d’une semaine le couvre-feu dans sa région de commandement. Le couvre-feu qui vient d’être rallongé, avait débuté le 9 février 2018 suite à l’assassinat des deux gendarmes à Mbingo (région du Nord-Ouest) le 1er février et un militaire au Commercial Avenue de Bamenda le 9 février 2018.  Pendant cette période du couvre-feu, les mouvements des personnes et des biens sont strictement interdits de 20 heures à 6 heures du matin, la circulation des motocyclettes est «complètement» suspendue. De même, tous les débits de boissons, les snack-bars et les boîtes de nuit, resteront fermés.  Le gouverneur invite tous ceux qui désirent se rendre dans la région ou bien la quitter, de le faire bien « avant 20 heures ». Le patron de la région relève que ces mesures ne sont pas applicables aux autorités administratives ainsi qu’aux forces de sécurité.  L’autorité administrative, qui a déjà eu à décréter, de manière par ailleurs très peu suivie, la même mesure, a mis en garde tout contrevenant à ces directives, qui sera puni selon les lois en vigueur.  Malgré le couvre-feu instauré le 9 février 2018, des hommes armés avaient attaqué l’arrondissement de Batibo dans la matinée du 11 février 2018 et avaient enlevé le sous-préfet de la localité qui est jusqu’à présent entre leurs mains. | | | | | | | | | | | | | |  |
|  | | |  |
|  | | |  | | | | | | | | | | | | | |  |
|  | | | **Nodes\\Financial Support** | | | | | | | | | | | | | |  |
|  |  | No |  | 0.0030 |  | 3 |  | | | | | | |
|  | | |  |  |  |  |  |  |  |  | | | | | | | |
|  | | | | | | | | | | | | 1 |  | CP |  | 12/5/2022 2:25 AM |  |
|  | | | 75000 ! C’est le nombre de personnes déplacées dans les deux régions anglophones. Le chiffre officiel a été communiqué le 13 juin à Yaoundé, par le ministre de l’Administration territoriale (Minat), Paul Atanga Nji, au cours d’une cérémonie de présentation d’un convoi d’aide humanitaire dépêché par le président de la République, au profit des populations du Sud-Ouest et du Nord-Ouest, victimes des exactions des groupes séparatistes. Au-delà des personnes déplacées, l’on déplore des pertes en vies humaines. Selon l’ONG International Crisis Group, le conflit aurait fait 1 850 morts et forcé plus de 530000 personnes à fuir leur domicile. Des chiffres contestés par le gouvernement et qui sont difficiles à prouver.  L’économie en pâtit aussi. Installée dans la région anglophone du Sud | | | | | | | | | | | | | |  |
|  | | |  |
|  | | |  | | | | | | | | | | | | | |  |
|  | | | | | | | | | | | | | | | | | |
|  | | | | | | | | | | | | | | | | | |
| Reports\\Coding Summary By Source Report | | | | | | | | | | | Page 11 of 146 | | | | | | |
| 1/21/2023 3:45 PM | | | | | | | | | | | | | | | | | |
|  | | | **Classification** |  | **Aggregate** |  | **Coverage** |  | **Number Of Coding References** |  | | **Reference Number** |  | **Coded By Initials** |  | **Modified On** |  |
|  | | | | | | | | | | | | | | | | | |
|  | | | | | | | | | | | | 2 |  | CP |  | 12/5/2022 11:35 PM |  |
|  | | | Le 13 mai aux Nations-Unies, le représentant américain à la rencontre sur la situation humanitaire née de la crise anglophone a révélé que depuis 2018, les États-Unis ont versé au Cameroun plus de 48 milliards FCFA d’assistance humanitaire.  L’ambassadeur américain Cherith Norman Chalet a expliqué que cette aide a été versée aux communautés d’accueil, aux Personnes déplacées internes et aux réfugiés. « Cette aide est essentielle pour sauver des vies, mais elle ne peut être efficace que si nous avons accès aux populations vulnérables », a-t-il ajouté.  Les États-Unis ont souhaité au cours de cette rencontre « une prise de conscience accrue et une visibilité accrue de la détérioration de la situation humanitaire au Cameroun, ainsi que l’ouverture immédiate d’un espace humanitaire et la fourniture d’un accès sans entrave du personnel humanitaire aux parties au conflit ».  L’International Crisis Group estime à 200 000 le nombre de réfugiés provoqués par la guerre civile en cours dans les régions du Nord-ouest et du sud-ouest du Cameroun. Les affrontements entre l’armée et les milices séparatistes ont déjà fait plus de 1800 morts en 20 mois estime Crisis Group. | | | | | | | | | | | | | |  |
|  | | |  |
|  | | |  | | | | | | | | | | | | | |  |
|  | | | | | | | | | | | | 3 |  | CP |  | 12/6/2022 12:51 AM |  |
|  | | | civils et politiques au Cameroun.  Pour illustrer ce désir de participer au processus de règlement du conflit anglophone, le Canada envisage offrir un soutien financier au Cameroun. Il est question d’apporter 6,65 millions de dollars canadiens (plus de 2 milliards francs CFA), en aide humanitaire, pour l’année 2019. Le financement est destiné à répondre aux besoins urgents des populations touchées par le conflit dans les régions du Nord-Ouest et du Sud-Ouest, et qui inclue les besoins spécifiques des femmes et des filles. | | | | | | | | | | | | | |  |
|  | | |  | | | | | | | | | | | | | |  |
|  | | | **Nodes\\Hostage** | | | | | | | | | | | | | |  |
|  |  | No |  | 0.0168 |  | 12 |  | | | | | | |
|  | | |  |  |  |  |  |  |  |  | | | | | | | |
|  | | | | | | | | | | | | 1 |  | CP |  | 12/6/2022 1:08 AM |  |
|  | | | 5 filles, 7 garçons c’est le nombre d’étudiants de l’Université de Bamenda enlevés hier mardi 11 décembre 2018 à Bamenda alors qu’ils allaient aux cours à croire à la vidéo ci-dessous.  Un regard hagard, signe de psychose se lit sur le visage de cette dizaine de jeunes. Les séparatistes Ambazoniens qui les ont pris en otage disent vouloir passer un message fort aux étudiants de l’Université de Bamenda qui ne prennent pas leur avertissement de ne plus se rendre au campus au sérieux.  Ils font la promesse de libérer ceux enlevés mais souligne que les prochains étudiants qu’ils arrêtont seront tout simplement assassinés car, fustigent-ils il ne peuvent pas mettre un terme à l’école pour se battre pour la libération de l’Ambazonie quand les autres vont à l’école.  Hier en journée on voyait dans une vidéo les étudiants de l’Université de Bambili à Bamenda qui couraient partout au campus lorsque les Ambazoniens y ont fait irruption et ont commencé à tirer en l’air. | | | | | | | | | | | | | |  |
|  | | |  |
|  | | |  | | | | | | | | | | | | | |  |
|  | | | | | | | | | | | | 2 |  | CP |  | 12/6/2022 1:12 AM |  |
|  | | | Depuis le samedi, 3 novembre 2018, l’on est sans nouvelle de Nwa Martin Nanjong, le sous-préfet de l’arrondissement de Noni, dans le département du Bui, région du Nord-Ouest.  Selon des sources concordantes, il a été kidnappé par des hommes armés, alors qu’il revenait de Bamenda.  Administrateur civil ayant travaillé par le passé dans la chaudière de Balik*umbat, département du Ngoketunjia, il était en poste depuis le 4 septembre 2017, suite au décret présidentiel n°2017/461 nommant des sous-préfets. Après les sous-préfets de Batibo, de Ngye, de Misaje et Menchum Valley, Nwa Martin Nanjong est le cinquième sous-préfet attaqué dans cette région par des présumés séparatistes. Mis à part le cas inextricable de Namata Diteng, ex-sous-préfet de Batibo, d’autres avant lui ont eu la chance d’être relaxés saufs. | | | | | | | | | | | | | |  |
|  | | |  |
|  | | |  | | | | | | | | | | | | | |  |
|  | | | | | | | | | | | | 3 |  | CP |  | 12/6/2022 1:50 AM |  |
|  | | | Le chef traditionnel de Wotutu, une localité de l’arrondissement de Buea (région du Sud-Ouest), a été enlevé mercredi après-midi par des hommes armés, selon des sources locales.  Chief John Elate a été enlevé par des hommes armés ce mercredi 12 septembre 2018, alors qu’il descendait d’une moto après un déplacement dans la ville voisine de Limbe. Selon des sources concordantes, Chief Elate s’était réfugié dans cette ville à la suite des combats incessants entre les forces de sécurité et les milices armées, qui secouent la ville de Buea. Les mêmes sources indiquent qu’il a été récupéré sur sa moto et a été transporté sur une autre moto par ses ravisseurs, vers une destination inconnue.  Les chefs traditionnels sont la cible des forces séparatistes depuis quelques semaines. Le weekend dernier, le chef traditionnel d’Oku a été libéré après avoir passé plusieurs jours en captivité, tout comme le Fon de Bafut, lui aussi enlevé avant sa libération quelques jours plus tard. En août, sept chefs traditionnels des villages proches de Buea avaient été libérés après avoir passé des semaines en captivité. L’un d’entre eux est décédé au cours de ce kidnapping.  L’enlèvement de chief John Elate est le dernier incident survenu à Wotutu, une localité dans laquelle l’ambiance est de plus en plus tendue ces dernières semaines, notamment en raison des violents affrontements qui opposent les forces de sécurité et les combattants armés qui ont fait | | | | | | | | | | | | | |  |
|  | | |  |
|  | | |  | | | | | | | | | | | | | |  |
| Reports\\Coding Summary By Source Report | | | | | | | | | | | Page 12 of 146 | | | | | | |
| 1/21/2023 3:45 PM | | | | | | | | | | | | | | | | | |
|  | | | **Classification** |  | **Aggregate** |  | **Coverage** |  | **Number Of Coding References** |  | | **Reference Number** |  | **Coded By Initials** |  | **Modified On** |  |
|  | | | | | | | | | | | | | | | | | |
|  | | | | | | | | | | | | 4 |  | CP |  | 12/6/2022 1:53 AM |  |
|  | | | Le proviseur du lycée bilingue de Mankon aurait été enlevé jeudi au sein de l’établissement.  André Gabiassi, professeur de français et proviseur du lycée bilingue de Mankon, aurait été enlevé jeudi matin vers 10 h, alors qu’il se préparait à présider une réunion du personnel, selon des sources. Les forces de sécurité sont immédiatement arrivées sur les lieux, mais les ravisseurs ont emmené le proviseur à une destination inconnue.  Aucun groupe n’a jusqu’ici revendiqué l’enlèvement et une déclaration officielle est toujours attendue.André Gabiassi a été kidnappé à la suite d’une série d’incidents survenus sur les campus des régions du Nord-Ouest et du Sud-Ouest du Cameroun depuis le début de la nouvelle année scolaire. Un proviseur a été enlevé à Bafut, torturé puis relâché. En ce moment, il est pris en charge dans une formation hospitalière. | | | | | | | | | | | | | |  |
|  | | |  |
|  | | |  | | | | | | | | | | | | | |  |
|  | | | | | | | | | | | | 5 |  | CP |  | 12/6/2022 11:31 PM |  |
|  | | | Diguengue Patrice a été kidnappé entre les localités de Njinikom et Belo le 5 juin 2018.  Des sources auprès de la 5e région de gendarmerie du Nord-Ouest rapportent que l’inspecteur de police Diguengue Patrice, originaire du département du Mayo-Danay (région de l’Extrême-Nord) et en service au commissariat de sécurité publique de Fundong dans le Nord-Ouest, a été enlevé le mardi 5 juin 2018 par un groupe armé entre Njinikom et Belo dans le département du Boyo.  Des photos postées sur des réseaux sociaux ce 6 juin 2018 par ses ravisseurs, montrent l’infortuné assis à même le sol avec les pieds enchainés et les chaines sécurisées par deux cadenas. Sur le visage de l’otage, l’on peut bien lire le calvaire qu’il traverse.  Depuis le début de cette année, plusieurs personnes ont été enlevé dans la localité de Belo. Le 30 avril 2018 par exemple, des assaillants avaient fait une incursion dans une chapelle de la localité et le Père William Neba, principal du collège privée confessionnel d’enseignement secondaire, St Bedes, avait été enlevé.  Dans son rapport mensuel publié le 2 juin 2018, l’Organisation Non-Gouvernementale l’International Crisis Group, relève que le mois de mai a été caractérisé par des enlèvements et des assassinats dans les régions du Nord-Ouest et du Sud-Ouest. L’association belge estime qu’au moins 60 personnes ont été tué en mai 2018 dans les deux régions. L’organisation prévient que juin 2018 pourrait être plus sanglante dans cette partie du pays. Elle invite l’église catholique à engager le dialogue avec les différentes factions en conflit pour éviter ces actes de violence. | | | | | | | | | | | | | |  |
|  | | |  |
|  | | |  |
|  | | |  | | | | | | | | | | | | | |  |
|  | | | | | | | | | | | | 6 |  | CP |  | 12/6/2022 11:41 PM |  |
|  | | | Ils ont été kidnappés en fin de semaine dernière par des hommes armés non identifiés.  Georgiana Enanga Sanga, proviseur de l’établissement secondaire publique (GHS) Bolifamba Mile 16-Buea et Eric Ngoumba, principal de l’Académie baptiste camerounaise Yoke-Muyuka, ont été kidnappés le vendredi 25 mai 2018.  Selon Stephen Nganje, président de l’association des parents d’élèves du lycée de Bolifamba, le véhicule transportant le proviseur a été intercepté par des hommes armés à quelques mètres du campus du lycée, alors qu’elle se préparait à boucler l’année scolaire 2017/2018.  Quatre hommes armés ont stoppé le chauffeur sous la menace de leurs armes. D’après des personnes ayant assisté à la scène, les inconnus n’ont pas cédé aux supplications de l’enseignante. Ils l’ont enlevée et conduite vers une destination inconnue.  Informées de l’incident, les forces de sécurité ont pris d’assaut le lycée de Bolifamba Mile 16-Buea, mais il était trop tard, car les ravisseurs avaient quitté les lieux. | | | | | | | | | | | | | |  |
|  | | |  |
|  | | |  | | | | | | | | | | | | | |  |
|  | | | | | | | | | | | | 7 |  | CP |  | 12/6/2022 11:43 PM |  |
|  | | | Le proviseur du lycée bilingue (GBHS) de Buea, Mme Enanga Georgiana Sanga, a été kidnappée par des inconnus ce 25 mai 2018 vers 8 heures du matin alors qu’elle se rendait au lycée comme à l’accoutumé.  La circulation des motos étant interdite, des témoins affirment avoir vu Madame le proviseur transportée à une destination inconnue à l’aide d’un vélo.  Bien que l’information soit à cette heure très sommaire, il est toutefois répandu dans la ville que des personnes se réclamant d’un groupe de défense de l’Ambazonie sont à l’origine du kidnapping de Mme Enanga. Elle est accusée d’avoir en complicité avec les forces de défenses obligée ses élèves à défiler le 20 mai, jour de la fête de l’unité nationale. | | | | | | | | | | | | | |  |
|  | | |  |
|  | | |  | | | | | | | | | | | | | |  |
|  | | | | | | | | | | | | 8 |  | CP |  | 12/6/2022 11:46 PM |  |
|  | | | Il a été Kidnappé dans la localité de Menji, chef-lieu du département dudit département, le 20 mai 2018.  Une autorité administrative camerounaise de plus, en service dans la région du Sud-Ouest, vient de tomber dans les mailles des filets des sécessionnistes. Le 20 mai 2018 en effet, le deuxième adjoint préfectoral du Lebialem dans le Sud-Ouest a été kidnappé par des éléments du groupe sécessionniste dénommé «Red Dragons », selon une source bien introduite auprès des services du gouverneur de la région du Sud-Ouest.  Sur une vidéo diffusée ce 21 mai 2018 sur les réseaux sociaux par les séparatistes, on y voit l’autorité administrative brandissant contre son gré le drapeau de l’Ambazonie lors de l’exécution de leur hymne par les adeptes du mouvement séparatiste, en majorité des jeunes des deux s*e*xes, armes à la main.  Une image on ne peut plus humiliante et choquante pour tout Camerounais qui espère à l’unité nationale de ce pays qui vient de célébrer sa 46è édition du « Vivre ensemble », si cher au président de la République, Paul Biya.  A titre de rappel, il importe de relever que plusieurs autorités du pays payent déjà le prix de ce bras de fer entre le gouvernement camerounais et le mouvement sécessionniste, parmi lesquels on peut citer le sous-préfet de Batibo, enlevé le 11 février 2018 et deux semaines après, le délégué régional des Affaires sociales pour le Nord-Ouest. Et pas plus tard que le 19 mai dernier, le maire de Bangem, dans la région du Sud-Ouest Cameroun, et son adjoint ont été kidnappés alors qu’ils procédaient à la distribution des gadgets relatifs à la Fête nationale du 20 mai. | | | | | | | | | | | | | |  |
|  | | |  |
|  | | |  |
|  | | |  | | | | | | | | | | | | | |  |
| Reports\\Coding Summary By Source Report | | | | | | | | | | | Page 13 of 146 | | | | | | |
| 1/21/2023 3:45 PM | | | | | | | | | | | | | | | | | |
|  | | | **Classification** |  | **Aggregate** |  | **Coverage** |  | **Number Of Coding References** |  | | **Reference Number** |  | **Coded By Initials** |  | **Modified On** |  |
|  | | | | | | | | | | | | | | | | | |
|  | | | | | | | | | | | | 9 |  | CP |  | 12/6/2022 11:49 PM |  |
|  | | | La victime et sa compagne avaient été kidnappées le 08 mai au village Golo, dans la commune d’Ekondo-Titi.  Leurs dépouilles ont été retrouvées deux jours plus tard dans une autre localité.  Le défunt s’appelait Takang Elvis Ayuke. Il avait rejoint le corps de la Gendarmerie nationale en 2013 et était en service au peloton 812 à Ekondo-Titi (département du Ndian). Sa dépouille a été retrouvée en cours de putréfaction dans la localité de Lipenja, deux jours après son kidnapping à Golo.  Tout commence le 08 mai. Le gendarme Takang Elvis Ayuke se rend à Kumba pour toucher son argent. Il est accompagné de sa petite amie (une jeune femme originaire de la région de l’Est, apprend-on). En cours de route, ils sont attaqués par des individus armés qui les conduisent vers une destination inconnue.  Des battues sont organisées pour retrouver ces deux personnes dans un contexte marqué par la violence à Ekondo-Titi. Les corps sont retrouvés le 10 mai. Celui de la jeune fille avait déjà été enterré tandis que celui-du soldat gisait en pleine brousse.  Une équipe composée de certains éléments du Bataillon des fusiliers marins (Bafumar) et des gendarmes est dépêchée pour aller déposer les corps à la morgue. En cours de route, non loin du village Konye, ils subissent aussi une attaque. Deux blessés sont enregistrés parmi les forces de défense et de sécurité. | | | | | | | | | | | | | |  |
|  | | |  |
|  | | |  | | | | | | | | | | | | | |  |
|  | | | | | | | | | | | | 10 |  | CP |  | 12/6/2022 11:54 PM |  |
|  | | | L’ancien vice-président de la Cour d’appel de la région camerounaise du Sud-Ouest, Mbeng Martin, a été enlevé très tôt dimanche matin, portant à quatre le nombre des membres des autorités kidnappés par des présumés sécessionnnistes anglophones.  Le juge a été enlevé dans la petite localité de Ewelle alors qu’il assistait aux funérailles de sa mère. « Les individus un peu nombreux ont débarqué de nulle part à bord des véhicules en prenant le juge et aussitôt répartis. Alertées, les forces de défense ont engagé des recherches pour le retrouver« .  L’information a été confirmée par le centre pour les droits de l’homme et la démocratie pour l’Afrique que dirige Agbor Nkongho qui déplore par ailleurs le kidnapping des autorités ainsi que la demande de rançon. Pour le moment, aucune information officielle n’a filtré sur cet enlèvement.  L’identité de ravisseurs n’est pas encore établie. Mais les soupçons sont orientés vers les sécessionnistes de l’Ambazonie, Etat auto-proclamé regroupant les deux régions anglophones du Cameroun, qui ont fait des kidnapping leur mode opératoire.  Le 3 avril dernier, le ministre camerounais de la communication, Issa Tchiroma Bakary, annonçait lors d’une conférence de presse la libération par l’armée d’une douzaine de touristes expatriés, dont sept suisses et cinq italiens. Dans la même série des enlèvements, figue celle du président du conseil d’administration du General Certificate of Education Board et une trentaine de personnes avaient été enlevés alors qu’ils se rendaient à un meeting de remerciement.  Pour l’avocat Agbor Nkongho, les enlèvements témoignent la détérioration de la crise anglophone et en appelle au dialogue entre les différentes parties prenantes. « Pour mettre un terme à l’impasse, toutes les parties doivent rechercher des négociations constructives qui conduiront à un règlement pacifique, à une stabilité à long terme et à l’égalité des chances pour tous les citoyens« , a-t-il indiqué. | | | | | | | | | | | | | |  |
|  | | |  |
|  | | |  |
|  | | |  | | | | | | | | | | | | | |  |
|  | | | | | | | | | | | | 11 |  | CP |  | 12/7/2022 12:19 AM |  |
|  | | | Encore un kidnaping d’une autorité par des individus non indentifiés. Le Professeur Ivo Leke Tambo, PCA de GCE Board a été enlevé ce samedi ainsi que 35 autres personnes à Lebialem au lieu dit Fondem dans arrondissement d’Alou par des personnes non identifiées.  D’après les informations parvenues à la rédaction, le nouveau président du conseil d’administration du Certificat général d’éducation du Cameroun (Conseil de la GCE) récemment nommé par Paul Biya, il y a presque 2 mois, était à une marche pacifique de remeriement à Paul Biya pour avoir nommé Paul Tsong Ministre délégué au MINEPAT chargé de la planification.  Difficile de dire pour l’instant, l’endroit où le PCA de GCE Board et ancien SG au Minsec a été conduit. L’identité des 35 autres personnes enlevées reste aussi à être precisée. | | | | | | | | | | | | | |  |
|  | | |  |
|  | | |  | | | | | | | | | | | | | |  |
|  | | | | | | | | | | | | 12 |  | CP |  | 12/7/2022 12:27 AM |  |
|  | | | Des sources auprès des services du gouverneur de la région du Nord-Ouest révèlent que le délégué régional des Affaires Sociales pour le Nord-Ouest, Nimbom Arong Yong, a été enlevé samedi dernier par des hommes armés dans le village Nyen, localité située près d’Ambo, arrondissement de Batibo.  « Le délégué s’est rendu à Nyen samedi pour assister aux funérailles. Lui et son chauffeur ont été enlevés par une bande armée. Le chauffeur a été libéré plus tard. Quant au délégué régional, nous n’avons aucune nouvelle de lui depuis samedi », indique ce dimanche une source auprès des services du gouverneur du Nord-Ouest. | | | | | | | | | | | | | |  |
|  | | |  | | | | | | | | | | | | | |  |
|  | | | **Nodes\\Human Interest** | | | | | | | | | | | | | |  |
|  |  | No |  | 0.0034 |  | 3 |  | | | | | | |
|  | | |  |  |  |  |  |  |  |  | | | | | | | |
|  | | | | | | | | | | | | 1 |  | CP |  | 12/5/2022 2:17 AM |  |
|  | | | Les corps d’une femme enceinte et d’une jeune fille ont été découverts hier mercredi 26/06/2019 par des villageois en état de décomposition au lieu dit Small Ekombe, à Mbongue, en proie à un conflit sur fond de revendications séparatistes entre l’armée camerounaise et les terroristes séparatistes armées anglophone.  D’après les habitants de ce village, elles auraient été violées puis tuées. Le doigt accusateur est pointé par ces derniers sur sécessionnistes anglophone semant terreur et désolation dans cette | | | | | | | | | | | | | |  |
|  | | |  | | | | | | | | | | | | | |  |
| Reports\\Coding Summary By Source Report | | | | | | | | | | | Page 14 of 146 | | | | | | |
| 1/21/2023 3:45 PM | | | | | | | | | | | | | | | | | |
|  | | | **Classification** |  | **Aggregate** |  | **Coverage** |  | **Number Of Coding References** |  | | **Reference Number** |  | **Coded By Initials** |  | **Modified On** |  |
|  | | | | | | | | | | | | | | | | | |
|  | | | | | | | | | | | | 2 |  | CP |  | 12/6/2022 12:38 AM |  |
|  | | | Ce fut une fête du travail plutôt sanglante à Likomba, dans le département du Fako, région du Sud-Ouest.  Nos sources nous informent qu’un homme de 26 ans, connu sous le surnom de gouvernor, a été tué ce 1er mai 2019 par des soldats Camerounais, pas loin de son domicile.  La victime désarmée a été abattue dans les environs de son domicile à Tiko. Cet assassinat aurait d’après nos sources mis en colère beaucoup de ses proches. Un monsieur sans histoire, connu de tous dans la région. | | | | | | | | | | | | | |  |
|  | | |  | | | | | | | | | | | | | |  |
|  | | | | | | | | | | | | 3 |  | CP |  | 12/6/2022 2:03 AM |  |
|  | | | Un groupe de personnes se présentant comme porte-parole des réfugiés camerounais installés au Nigeria ont écrit une lettre au HCR dans ce sens.  Ils ne veulent rien recevoir du gouvernement camerounais. C’est la quintessence du message contenu dans la correspondance signée par une dizaine de personnes. Se présentant comme porte-parole des quelques 21 réfugiés camerounais de la crise anglophone basés au Nigéria, ces derniers disent : « Nous n’accepterons aucune aide et ne voulons voir aucune visite de la part du gouvernement camerounais ».  Cette position radicale s’explique, disent-ils, par les actes posés par le gouvernement depuis le déclenchement de la crise dans les régions anglophones du Cameroun il y a près de deux ans : ils accusent le gouvernement d’être le principal responsable de la précarité dans laquelle ils vivent ; ils dénoncent la détention dans un lieu secret, du leader pro-indépendantiste Sisiku Ayuk Tabe et ses compagnons depuis 7 mois et ce, sans jugement. « Le problème des réfugiés et demandeurs d’asile camerounais au Nigeria n’est pas la nourriture », écrivent-ils.  Cette sortie fait suite à mise en œuvre d’un plan d’urgence humanitaire décidée par le Président de la République le 20 juin 2018. Evalué à 12,7 milliards de FCFA, cet argent proviendra du budget de l’Etat, des contributions des pays amis du Cameroun et des fonds collectés à la suite d’un appel à la générosité lancé par le gouvernement.  Cette aide humanitaire va servir : « à la protection des personnes déplacées; la fourniture des denrées alimentaires et des produits de première nécessité; les soins de santé; l’éducation; la reprise des activités économiques, notamment agricoles; le logement et la reconstitution des documents d’état-civil et des pièces administratives individuelles » | | | | | | | | | | | | | |  |
|  | | |  |
|  | | |  |
|  | | |  | | | | | | | | | | | | | |  |
|  | | | **Nodes\\Lives Lost** | | | | | | | | | | | | | |  |
|  |  | No |  | 0.0250 |  | 20 |  | | | | | | |
|  | | |  |  |  |  |  |  |  |  | | | | | | | |
|  | | | | | | | | | | | | 1 |  | CP |  | 12/5/2022 12:56 AM |  |
|  | | | Les 3 vaillants éléments des forces de défense camerounaise ont rendu l’âme, au cours des échanges de coups de feu avec les séparatistes.  L’armée camerounaise en deuil. Celle-ci vient de perdre des éléments. Hier, jeudi 26 novembre 2020, trois hommes appartenant au 21ème bataillon des fusillés marins ont perdu leurs vies, après avoir succombé à leurs blessures respectives. Ces derniers ont été grièvement été blessés par balle dans une embuscade tendue par des séparatistes. Les faits se sont déroulés dans la commune d’Ekondo Titi (département du Ndian, région du Sud-Ouest). | | | | | | | | | | | | | |  |
|  | | |  | | | | | | | | | | | | | |  |
|  | | | | | | | | | | | | 2 |  | CP |  | 12/5/2022 1:01 AM |  |
|  | | | Le corps sans vie de la victime a été découvert le mardi 4 août 2020, sous le port du département de la Mezam.  Une découverte macabre mardi dernier dans la région du Nord-Ouest, et plus précisément sous le pont de la Mezam. Il s’agit du corps sans vie d’une adolescente qui se prénommait Trésor et qui menait une activité génératrice de revenus au marché centrale de Bamenda.  Dans une vidéo virale qui circule actuellement sur les réseaux sociaux, il est déplorable de constater que son cou est complètement tranché. | | | | | | | | | | | | | |  |
|  | | |  | | | | | | | | | | | | | |  |
|  | | | | | | | | | | | | 3 |  | CP |  | 12/5/2022 1:10 AM |  |
|  | | | Il s’appelait Ashu Prinsley Ojong. Il avait 35 ans seulement. C’était le nouveau maire de Mamfe, département de la Manyu dans la région du Sud-Ouest.  Il a été assassiné ce matin du dimanche, 10 mai 2020. Selon nos informations, appelé au téléphone par de présumés séparatistes qui l’invitaient à se rendre à Eshobi son village afin de les voir déposer les armes, le maire est plutôt tombé dans un guet apens. Il a été froidement abattu par les séparatistes, peu avant le pont de son village construit par la multinationale française Satom. | | | | | | | | | | | | | |  |
|  | | |  | | | | | | | | | | | | | |  |
|  | | | | | | | | | | | | | | | | | |
| Reports\\Coding Summary By Source Report | | | | | | | | | | | Page 15 of 146 | | | | | | |
| 1/21/2023 3:45 PM | | | | | | | | | | | | | | | | | |
|  | | | **Classification** |  | **Aggregate** |  | **Coverage** |  | **Number Of Coding References** |  | | **Reference Number** |  | **Coded By Initials** |  | **Modified On** |  |
|  | | | | | | | | | | | | | | | | | |
|  | | | | | | | | | | | | 4 |  | CP |  | 12/5/2022 2:34 AM |  |
|  | | | Le décompte est fait par le Centre for Human Rights and Democracy in Africa dans un récent rapport.  Entre 2017 et 2019, 206 villages ont été brûlés dans les régions du Nord-ouest et du Sud-ouest du Cameroun. C’est ce que rapporte le Centre for Human Rights and Democracy in Africa (CHRDA), dans un rapport récemment rendu public.  Dans ce décompte, l’Ong rapporte que dans la région du Nord-ouest, 107 villages ont été réduits en cendres, pour 99 villages dans la région du Sud-ouest.  Dans ces chiffres, l’on note que 134 villages ont été « sévèrement affectés », autrement dit une destruction complète du village. 57 villages ont été partiellement affectés avec incendie de maison et destruction de bien ; et 15 ont connu des dommages encore moindres.  Depuis 2017, les régions anglophones se sont soulevées contre le pouvoir central dans ce qui s’est transformé en guerre civile entre militaires et indépendantistes armés. L’armée est régulièrement accusée de pratiquer la tactique de la terre brulée en incendiant des villages | | | | | | | | | | | | | |  |
|  | | |  |
|  | | |  | | | | | | | | | | | | | |  |
|  | | | | | | | | | | | | 5 |  | CP |  | 12/6/2022 12:38 AM |  |
|  | | | Ce fut une fête du travail plutôt sanglante à Likomba, dans le département du Fako, région du Sud-Ouest.  Nos sources nous informent qu’un homme de 26 ans, connu sous le surnom de gouvernor, a été tué ce 1er mai 2019 par des soldats Camerounais, pas loin de son domicile.  La victime désarmée a été abattue dans les environs de son domicile à Tiko. Cet assassinat aurait d’après nos sources mis en colère beaucoup de ses proches. Un monsieur sans histoire, connu de tous dans la région. | | | | | | | | | | | | | |  |
|  | | |  | | | | | | | | | | | | | |  |
|  | | | | | | | | | | | | 6 |  | CP |  | 12/6/2022 1:00 AM |  |
|  | | | Nous apprenons à l’instant que le Colonel YAOUBA Ousmanou, commandant du 3 ème bataillon amphibie du BIR à Limbe vient d’être abbatu à Kumbo par les Ambazoniens.  MISE AU POINT.  Une information selon laquelle un certain « Colonel Yaouba Ousmanou » apparatenant au 3eme Bataillon amphibie du BIR aurait été abattu par les sécessionnistes à hauteur de Kumbo, circule en ce moment. Nous démentons catégoriquement cette information qui fait le buzz dans l’infosphère, certainement dans le but inavoué de désinformer, distraire, ou véhiculer des informations de nature à saper moral de nos Forces, et à créer la psychose auprès des populations. L’unité en question n’existe que dans l’imaginaire élucubratif de son auteur, ainsi que cet officier inconnu de nos effectifs. C’est l’occasion de vous inviter à prendre toutes les précautions dans la gestion des informations liées à la sécurité.  Consultez nous au préalable. | | | | | | | | | | | | | |  |
|  | | |  |
|  | | |  | | | | | | | | | | | | | |  |
|  | | | | | | | | | | | | 7 |  | CP |  | 12/6/2022 1:03 AM |  |
|  | | | Les généraux Ojong Elvis Ojong et Obi ont été tués dimanche, au cours d’une opération militaire dans la ville de Mamfé, région du Nord-Ouest.  Les éléments du Bataillon d’intervention rapide (Bir) ont neutralisé deux leaders des factions armées ambazoniennes. Victor Obi A.k.a « général Ibo » a été tué lors d’un raïd mené par l’armée aux premières heures de la journée de dimanche. Ce jeune homme de 26 ans avait rejoint les forces de défenses de l’Ambazonie (Adf) après avoir fui l’arrivée des soldats à Kajifu (département du Manyu, région du Sud-Ouest) en décembre 2017.  Ojong Elvis Ojong, alias « General Eyong », un autre chef de guerre séparatiste, a été tué au cours de ces mêmes opérations.  Les concernés qui avaient trouvé refuge en divers lieux en brousse ont été surpris par les | | | | | | | | | | | | | |  |
|  | | |  |
|  | | |  | | | | | | | | | | | | | |  |
|  | | | | | | | | | | | | | | | | | |
|  | | | | | | | | | | | | | | | | | |
|  | | | | | | | | | | | | | | | | | |
| Reports\\Coding Summary By Source Report | | | | | | | | | | | Page 16 of 146 | | | | | | |
| 1/21/2023 3:45 PM | | | | | | | | | | | | | | | | | |
|  | | | **Classification** |  | **Aggregate** |  | **Coverage** |  | **Number Of Coding References** |  | | **Reference Number** |  | **Coded By Initials** |  | **Modified On** |  |
|  | | | | | | | | | | | | | | | | | |
|  | | | | | | | | | | | | 8 |  | CP |  | 12/6/2022 1:25 AM |  |
|  | | | En communiquant ce chiffre hier à Yaoundé, Martin Mbarga Nguele a également annoncé les mesures prises pour sécuriser les élections présidentielles.  Depuis le déclenchement de la crise socio-politique en novembre 2016 dans les régions du Nord-Ouest et du Sud-Ouest, 18 fonctionnaires de police ont déjà trouvé la mort dans le cadre de cette crise. Ce chiffre a été communiqué hier par Martin Mbarga Nguele, le délégué général à la Sûreté nationale. Il présidait la cérémonie de promotion à titre exceptionnel et de remise des épaulettes et décorations à deux fonctionnaires de police.  Parlant des policiers ayant trouvé la mort, le délégué général à la Sureté nationale a déclaré : « Ces policiers ont été attaqués violemment assassinés parce qu’ils défendaient les institutions républicaines. L’information claire et nette. Leur esprit de sacrifice et leur héroïsme vont inspirer notre action dans le rétablissement de l’ordre public ». Le patron de la police a ensuite réitéré l’engagement de ses éléments à traquer les « fauteurs de trouble ».  Par la même occasion, le délégué général à la Sureté nationale a présenté les mesures spéciales prises par le président de la République pour que les élections présidentielles prévues en octobre prochain puissent se dérouler normalement dans les deux régions qui connaissent les défis sécuritaires. Dans son discours, Martin Mbarga Nguele a ajouté : « L’élection présidentielle survient dans un contexte relativement agité avec l’épicentre, les régions du Nord-Ouest et du Sud-Ouest, où des entrepreneurs du chaos, incendient aussi bien les édifices publics que privés, procèdent aux enlèvements, des prises d’otage et assassinent des innocents.  Ces partisans du désordre projettent de perturber les élections présidentielles prévues en octobre prochain. Face à tout cela, la police a le devoir de garantir le respect de la loi et de l’ordre public. Le chef de l’Etat a débloqué à cet effet, les moyens substantiels pour le renforcement des équipements de la police et l’acquisition des moyens de protection mieux adaptés à la mutation des défis actuels de sécurité intérieure. L’ouverture sur le Cameroun. Sous la houlette des autorités administratives et en collaboration avec les autres forces de défense et de sécurité, la police assumera pleinement ses missions dans le cadre de la sécurisation du processus électoral et dans le respect des lois de la République. Ainsi face aux entrepreneurs du chaos, la police fera prévaloir la force du droit.  Face à la barbarie et au terrorisme, la police opposera la légitime défense et défendra la République et l’Etat de droit. Face au désordre et aux violences de toute sorte, elle constituera un rempart implacables », a déclaré le délégué général à la Sureté nationale. | | | | | | | | | | | | | |  |
|  | | |  |
|  | | |  |
|  | | |  |
|  | | |  | | | | | | | | | | | | | |  |
|  | | | | | | | | | | | | 9 |  | CP |  | 12/6/2022 1:56 AM |  |
|  | | | Le corps a été découvert jeudi matin dans un état de décomposition près de sa voiture.  Un gendarme à la retraite a été pris pour cible par des hommes se réclamant sécessionnistes. Il a été enlevé mardi soir, puis abattu à l’entrée du village de Guzang, non loin de Batibo, dans la région du Nord-Ouest.  Des sources affirment qu’il a été brûlé à côté de sa voiture par des présumés combattants séparatistes, qui le soupçonnaient d’être en complicité avec les forces de sécurité. Ils étaient persuadés que ce gendarme à la retraite aidait les militaires à les traquer dans cette partie du pays.  Il était accusé d’avoir laissé sa voiture à la disposition des éléments des forces de défenses camerounaise pour leurs opérations dans la région. | | | | | | | | | | | | | |  |
|  | | |  |
|  | | |  | | | | | | | | | | | | | |  |
|  | | | | | | | | | | | | 10 |  | CP |  | 12/6/2022 1:56 AM |  |
|  | | | Les circonstances de leur décès sont encore inconnues.  Des cadavres de trois jeunes hommes ont été découverts ce jeudi à Wum, localité située dans la région du Nord-Ouest du Cameroun. Ils n’ont pas été identifiés et les circonstances de leur mort ne sont pas connues pour l’instant.  Mais, cette ville est particulièrement la cible de violences depuis quelques semaines. Un magistrat a été kidnappé le mardi 21 août. Il se trouvait à bord d’un véhicule de transport en commun. L’on n’a pas de récentes nouvelles de Tahle Mukete, qui cumulait des fonctions de président du Tribunal de grande instance et de première instance de Wum.  Le 24 août dernier, deux gendarmes ont été tués au cours d’une attaque menée à Zhoa, village situé près de Wum, dans le poste de gendarmerie. | | | | | | | | | | | | | |  |
|  | | |  |
|  | | |  | | | | | | | | | | | | | |  |
|  | | | | | | | | | | | | 11 |  | CP |  | 12/6/2022 1:59 AM |  |
|  | | | Mort en captivité, la dépouille de Sa Majesté Mbanda a été remise à sa famille au moment où les « Ambazoniens » libéraient six autres chefs pris en otage.  L’ultimatum donné par le maire de Buea, Patrick Ekéma, le 30 juillet dernier aux sécessionnistes, a porté ses fruits. Au sortir de la conférence donnée par les fils et filles Bakwéri du Sud-Ouest en début de semaine, l’édile donnait 24h aux « Ambazoniens » pour libérer les chefs traditionnels enlevés. D’autant plus que d’après Patrick Ekéma, la rumeur du décès d’un de ces gardiens de la tradition s’était déjà répandue dans la ville. L’on s’y attendait le moins, lorsque dans la nuit de lundi à mardi dernier, cinq chefs ont été remis en liberté.  La sixième autorité traditionnelle respirera l’air de la liberté le lendemain mardi, aux environs de midi. Reste que la dépouille de Chief Mbanda, chef de Lysoka qui a succombé aux « actes de torture » de la part des sécessionnistes pendant sa détention, a également été remise à sa famille. « La famille a reçu un coup de fil lui indiquant où est-ce qu’elle devait trouver le corps du chef », apprend-on. L’ouverture sur le Cameroun. Pour l’heure, rien ne filtre sur le lieu où ces chefs ont été accueillis. L’on sait tout au moins qu’après plus de deux semaines de captivité, tous les chefs ont finalement été libérés avant la marche organisée hier 31 juillet, sur la principale artère de la ville de Buea par le maire de la ville. Un mouvement lancé à 12h, après deux heures de retard. Ceci, en raison du mot d’ordre de l’opération «  villes-mortes » instauré par des « Ambazoniens ».  Les populations de Buea ont donc eu du mal à quitter leurs maisons pour descendre dans la rue, et marcher contre les sécessionnistes. Au cours de la conférence donnée lundi dernier par Patrick Ekéma et les ressortissants Bakwéri, l’édile a appelé les habitants de sa ville à tenir tête aux sécessionnistes.  « Ce sont des maquisards. C’est pour leur dire qu’ils n’ont pas de talisman. Parce que s’ils l’avaient, ils seraient allés prendre la présidence. Chaque fois qu’ils voient les militaires, pourquoi fuient-ils ? », s’indigne le maire de Buea | | | | | | | | | | | | | |  |
|  | | |  |
|  | | |  |
|  | | |  | | | | | | | | | | | | | |  |
| Reports\\Coding Summary By Source Report | | | | | | | | | | | Page 17 of 146 | | | | | | |
| 1/21/2023 3:45 PM | | | | | | | | | | | | | | | | | |
|  | | | **Classification** |  | **Aggregate** |  | **Coverage** |  | **Number Of Coding References** |  | | **Reference Number** |  | **Coded By Initials** |  | **Modified On** |  |
|  | | | | | | | | | | | | | | | | | |
|  | | | | | | | | | | | | 12 |  | CP |  | 12/6/2022 2:00 AM |  |
|  | | | Un policier a été décapité mercredi dans une localité de la région camerounaise du Nord-Ouest anglophone, où les meurtres de membres des forces camerounaises sont régulièrement imputés aux combattants séparatistes, a-t-on appris de sources concordantes.  Un policier en poste à Wum (Nord-Ouest) « a été tué« , a déclaré à l’AFP une source sécuritaire, confirmant une information d’un proche de la victime.  Le policier se trouvait à barrage routier, en compagnie d’un collègue, lorsque des hommes soupçonnés d’être des sécessionnistes l’ont attaqué, selon la source sécuritaire.  « Ils ont coupé sa tête et l’ont emportée« , a-t-elle précisé.  La sécurité dans les régions du Nord-Ouest et du Sud-Ouest anglophones s’est considérablement dégradée. Les combats y sont devenus quotidiens entre les forces de sécurité et des séparatistes armés réclamant la création d’un Etat anglophone indépendant.  Plus de 80 policiers et militaires y ont été tués depuis le début de la crise, fin 2016.  Ce conflit armé de plus en plus violent, ainsi que celui contre le groupe jihadiste Boko Haram dans le nord du pays, pourraient perturber le scrutin présidentiel prévu le 7 octobre, selon les analystes.  Le président Paul Biya, 85 ans dont 35 au pouvoir, s’est déclaré candidat la semaine dernière à un septième mandat consécutif.  Ses partisans estiment qu’il est le mieux à même de répondre à la crise anglophone, ses opposants l’accusant d’en être responsable. | | | | | | | | | | | | | |  |
|  | | |  |
|  | | |  |
|  | | |  | | | | | | | | | | | | | |  |
|  | | | | | | | | | | | | 13 |  | CP |  | 12/6/2022 2:04 AM |  |
|  | | | Pris dans une embuscade de week-end, des gendarmes ont échangé des tirs avec des séparatistes ; ils ont éliminé quelque 6 d’entre eux en perdant un des leurs.  L’une des 07 victimes de ces altercations est un gendarme qui officiait dans la patrouille opérationnelle. Son corps sans vie a été retrouvé dans les maquis, à coté de 6 autres, par ses collègues en mission de soutien. Comme l’a rapporté le Col. Didier BADJECK, communicant du Ministère de la défense, ce soldat était d’une escorte d’éléments de la gendarmerie d’Andek cheminant avec quelques-uns du Bataillon troupes aéroportées (BTAP) de Koutaba à bord d’un Pick-up qui ont été surpris par un guet-apens est tombée des sécessionnistes à Tuguy, près de Mbengwi dans le département de la Momo. Outre l’unique mort enregistré chez les soldats, cinq | | | | | | | | | | | | | |  |
|  | | |  |
|  | | |  | | | | | | | | | | | | | |  |
|  | | | | | | | | | | | | 14 |  | CP |  | 12/6/2022 11:47 PM |  |
|  | | | La police camerounaise est dans la tristesse depuis hier suite à cause de l’assassinat de l’officier de police ABOUBAKAR, commissaire de la localité de Oshe située dans la région le Nord-Ouest, tué hier par des hommes armés – certainement des séparatistes.  Il était également chef du village Karna-Manga, village situé dans la commune de Mbe, région de l’Adamaoua, département de la Vina.  Rappelons qu’en dehors des civils, c’est le énième homme en tenue qui péri dans la guerre en zone anglophone entre temps on célèbrera la 46 ème édition de la fête nationale du Cameroun dimanche prochain sous le thème de : << Citoyens camerounais, restons unis dans la diversité et préservons la paix sociale, pour un Cameroun stable, indivisible et prospère ». | | | | | | | | | | | | | |  |
|  | | |  | | | | | | | | | | | | | |  |
|  | | | | | | | | | | | | 15 |  | CP |  | 12/6/2022 11:49 PM |  |
|  | | | La victime et sa compagne avaient été kidnappées le 08 mai au village Golo, dans la commune d’Ekondo-Titi.  Leurs dépouilles ont été retrouvées deux jours plus tard dans une autre localité.  Le défunt s’appelait Takang Elvis Ayuke. Il avait rejoint le corps de la Gendarmerie nationale en 2013 et était en service au peloton 812 à Ekondo-Titi (département du Ndian). Sa dépouille a été retrouvée en cours de putréfaction dans la localité de Lipenja, deux jours après son kidnapping à Golo.  Tout commence le 08 mai. Le gendarme Takang Elvis Ayuke se rend à Kumba pour toucher son argent. Il est accompagné de sa petite amie (une jeune femme originaire de la région de l’Est, apprend-on). En cours de route, ils sont attaqués par des individus armés qui les conduisent vers une destination inconnue.  Des battues sont organisées pour retrouver ces deux personnes dans un contexte marqué par la violence à Ekondo-Titi. Les corps sont retrouvés le 10 mai. Celui de la jeune fille avait déjà été enterré tandis que celui-du soldat gisait en pleine brousse.  Une équipe composée de certains éléments du Bataillon des fusiliers marins (Bafumar) et des gendarmes est dépêchée pour aller déposer les corps à la morgue. En cours de route, non loin du village Konye, ils subissent aussi une attaque. Deux blessés sont enregistrés parmi les forces de défense et de sécurité. | | | | | | | | | | | | | |  |
|  | | |  |
|  | | |  | | | | | | | | | | | | | |  |
|  | | | | | | | | | | | | 16 |  | CP |  | 12/6/2022 11:55 PM |  |
|  | | | Le porte-parole de l’Ambazonie, Chris Anu, relève que cet haut commis de l’Etat a été assassiné dernièrement par Ayaba Cho.  Dans une déclaration publiée dans les premières heures de ce Mercredi 4 avril 2018, Chris Anu annonce avec consternation l’assassinat du délégué régional des Affaires Sociales pour le Nord-Ouest par Cho Ayaba, l’un des leaders du mouvement séparatiste anglophone.  «Animboum Aaron Akiabom, délégué des Affaires Sociales à Bamenda, un pasteur de longue date / Diacre de l’Eglise Baptiste avait été enlevé à Batibo alors qu’il rentrait des funérailles. Cho Ayaba avait revendiqué ce rapt à travers une vidéo publiée le 10 mars sur des réseaux sociaux, Je viens d’apprendre qu’il a été exécuté», annonce Chris Anu qui se demande pourquoi un tel acte vicieux. D’après le porte-parole de l’Ambazonie, la révolution en cours n’a pas pour objectif d’exécuter ses victimes mais de pourchasser ceux qui les ont transformé en victimes.  Dans une vidéo postée le 10 mars 2018 dans les réseaux sociaux, le délégué Animbom Aaron avait déclaré avoir été enlevé par des éléments de l’Ambazonia Defense Force (ADF), la branche armée du mouvement du sécessionniste. Les ravisseurs donnaient 48h au Gouvernement pour qu’il donne signe de vie de leurs leaders de l’Ambazonie arrêtés aux Nigéria et extradés au Cameroun en janvier 2018. Passé ce délai, Animbom Aron allait être exécuté selon ses propres déclarations sur l’enregistrement.  Le samedi 24 février 2018 que le délégué régional des Affaires Sociales pour le Nord-Ouest, Animbom Aaron Ankiambom, avait été kidnappé dans la localité de Batibo. Il revenait du village Ashong, où il avait pris part à des obsèques, lorsque sa | | | | | | | | | | | | | |  |
|  | | |  |
|  | | |  |
|  | | |  | | | | | | | | | | | | | |  |
| Reports\\Coding Summary By Source Report | | | | | | | | | | | Page 18 of 146 | | | | | | |
| 1/21/2023 3:45 PM | | | | | | | | | | | | | | | | | |
|  | | | **Classification** |  | **Aggregate** |  | **Coverage** |  | **Number Of Coding References** |  | | **Reference Number** |  | **Coded By Initials** |  | **Modified On** |  |
|  | | | | | | | | | | | | | | | | | |
|  | | | | | | | | | | | | 17 |  | CP |  | 12/7/2022 12:20 AM |  |
|  | | | Les concernés ont trouvé la mort dimanche, au cours d’une attaque du poste de gendarmerie. Quatre autres gendarmes ont été blessés.  Deux élèves gendarmes ont péri dimanche, 11 mars, dans un assaut contre le poste de gendarmerie de Songwa (région du Nord-Ouest). Ceux-ci étaient sortis du poste pour les toilettes lorsqu’ils ont été attaqués par des individus armés.  Les autres gendarmes – dont le chef de poste – présents sur les lieux sont restés cloitrés dans le poste en attendant le renfort qui est arrivé quelques heures plus tard. Les sécessionnistes avaient, cependant, déjà eu le temps de fuir.  Les forces de sécurité ont également enregistré quatre blessés et perdu deux armes de guerres de marque Fal et AK47. | | | | | | | | | | | | | |  |
|  | | |  | | | | | | | | | | | | | |  |
|  | | | | | | | | | | | | 18 |  | CP |  | 12/7/2022 12:34 AM |  |
|  | | | Son œil a été crevé et son arme emportée par ses agresseurs ce dimanche 18 Fevrier 2018. Le poste de contrôle de Nguti situé sur l’axe Mamfe – Kumba dans la région du Sud-Ouest a été attaqué le dimanche 18 février 2018 par des hommes armés non-identifiés selon des sources auprès de la légion de gendarmerie du Sud-Ouest.  Ces sources rapportent que l’élève gendarme Degoume Jean-Claude a été assassiné lors de l’attaque, « son œil crevé et son arme emportée ». D’après la gendarmerie, cette attaque qui a eu lieu vers 15 heures a fortement perturbé la circulation ce dimanche sur l’axe routier entre Bamenda | | | | | | | | | | | | | |  |
|  | | |  | | | | | | | | | | | | | |  |
|  | | | | | | | | | | | | 19 |  | CP |  | 12/7/2022 12:37 AM |  |
|  | | | Deux éléments de nos forces de défense dont le maréchal des logis Souzock Mvondo larissa ont été froidement assassinés jeudi dernier dans la région du Nord-ouest.  Leurs présumés assassins ont été arretés.  Cet assassinat a ému l’opinion nationale et internationale poussant à de multiples interrogations sur la fin de la crise qui perdure dans les deux régions anglophones du Cameroun. Deux gendarmes ont succombé à leurs blessures jeudi dernier après une attaque dans le Nord-ouest. Acte attribué aux séparatistes dont les membres venaient d’être extradés au Cameroun. Ils ont été abattus dans un « check-point » dans la localité de Bingo où ils étaient en fonction. Aux dernières nouvelles, deux individus considérés comme étant les présumés assassins viennent d’être | | | | | | | | | | | | | |  |
|  | | |  |
|  | | |  | | | | | | | | | | | | | |  |
|  | | | | | | | | | | | | 20 |  | CP |  | 12/7/2022 1:03 AM |  |
|  | | | Au Cameroun, depuis bientôt trois ans, une guerre a éclaté loin des regards extérieurs.  Tenues à l’écart des médias, les deux régions anglophones du Nord-Ouest et Sud-ouest ont basculé dans un conflit d’où n’émergent sur les réseaux sociaux que quelques rares et horribles images d’exactions.  Entre les groupes armés qui combattent pour l’indépendance de ces deux régions et les forces armées camerounaises, les civils paient le prix fort. D’après les Nations unies, 4 millions de personnes sont affectées par le conflit.  Plus d’un demi-million de personnes ont été déplacées, près de 2 000 tuées. Les enlèvements sont devenus un commerce en pleine expansion alors que l’économie de la région s’effondre.  En dehors du climat délétère dans les régions du Nord-Ouest et du Sud-ouest, une autre crise sociopolitique est née à la suite de la présidentielle du 07 octobre 2018 avec l’arrestation des leaders du Mouvement pour la Renaissance du Cameroun arrivé deuxième selon les résultats rendus publics par le Conseil constitutionnel. | | | | | | | | | | | | | |  |
|  | | |  |
|  | | |  | | | | | | | | | | | | | |  |
|  | | | **Nodes\\Peace and Unity** | | | | | | | | | | | | | |  |
|  |  | No |  | 0.0184 |  | 17 |  | | | | | | |
|  | | |  |  |  |  |  |  |  |  | | | | | | | |
|  | | | | | | | | | | | | 1 |  | CP |  | 12/5/2022 12:59 AM |  |
|  | | | Cependant l’Archevêque émérite de Douala ne s’est pas arrêté en si bon chemin. Il a terminé son témoignage en proposant au Président de la République une voie de sortie pour cette crise qui perdure depuis quatre années déjà : « Je crois que c’est au Chef de l’État maintenant de faire quelque chose. Je crois qu’il peut le faire, c’est-à-dire déclarer l’amnistie pour qu’il aie la paix, et pour que les enfants aillent à l’école, que les salles de classe soient remplies par les enfants. Il faut que l’armée rentre dans les casernes, et que ses garçons là déposent les armes » | | | | | | | | | | | | | |  |
|  | | |  | | | | | | | | | | | | | |  |
|  | | | | | | | | | | | | 2 |  | CP |  | 12/5/2022 1:27 AM |  |
|  | | | Après 3 ans, la Russie, la Chine et les USA sont pour l’indivisibilité du Cameroun. La Russie dit être contre toute ingérence dans ce conflit qui est du ressort des Camerounais eux même.  USA de leurs côtés comptent accompagner le pays de Paul Biya pour une meilleure implémentation de la décentralisation. Position qui est similaire à celle de la Chine.  Sur le terrain malgré une campagne de diabolisation du pays. La situation s’est d’avantage amélioré. Le Sud-Ouest est pratiquement sorti du spectre de la violence. Le Nord-Ouest l’est aussi malgré quelques poches de résistance ça et là . Il est aussi en voie de pacification.  Les camerounais doivent arrêter cette campagne de diabolisation que certains font contre leur pays pour des raisons purement partisanes.  Le tribalisme, le repli identitaire, l’apologie de la haine ne peuvent en rien aider ce grand pays ! Mais l’amour d’antan, la passion de ce que cette grande mosaïque culturelle était. | | | | | | | | | | | | | |  |
|  | | |  |
|  | | |  | | | | | | | | | | | | | |  |
| Reports\\Coding Summary By Source Report | | | | | | | | | | | Page 19 of 146 | | | | | | |
| 1/21/2023 3:45 PM | | | | | | | | | | | | | | | | | |
|  | | | **Classification** |  | **Aggregate** |  | **Coverage** |  | **Number Of Coding References** |  | | **Reference Number** |  | **Coded By Initials** |  | **Modified On** |  |
|  | | | | | | | | | | | | | | | | | |
|  | | | | | | | | | | | | 3 |  | CP |  | 12/5/2022 1:58 AM |  |
|  | | | Je propose aujourd’hui qu’un Conseil National de la Réunification soit créé au plus haut niveau de l’Etat. Il se réunira tous les 6 mois pour évaluer la mise en œuvre de ce code dont la finalité sera l’avènement du Camerounais nouveau, riche de sa culture double. Pour marquer symboliquement mais puissamment la rupture avec la politique centralisatrice que mène le gouvernement depuis plus de trente ans, je propose également que notre pays retrouve son appellation de ‘’République Unie du Cameroun’’ ainsi que le drapeau arborant deux étoiles jaunes sur la bande verte, au lieu d’une étoile jaune sur la bande rouge comme c’est actuellement le cas’’.  A la suite de ces propositions, le Président Biya déclarera dans son discours de la fin d’année 2016 : « les voix qui se sont exprimées ont été toutes entendues. Elles ont dans bien des cas, soulevé des questions de fonds que l’on ne saurait négliger… Nous sommes disposés, à la suite et dans l’esprit des artisans de la Réunification, à créer une structure nationale dont la mission sera de nous proposer des solutions pour maintenir la paix, consolider l’unité de notre pays et renforcer notre volonté et notre Pratique quotidienne du VIVRE ENSEMBLE. …’’  Mais, au lieu d’adresser l’ensemble des ‘’questions de fond’’ soulevées, comme lui-même l’a relevé, le président Biya s’est contenté de créer, par décret du 23 janvier 2017, une ‘’commission Nationale pour la Promotion du Bilinguisme et du Multiculturalisme’’, un organe essentiellement administratif qui, de l’avis de l’ensemble des observateurs de la scène politique camerounaise, n’est pas à la hauteur des enjeux.  Dans une interview accordée au journal en ligne ‘Slate Afrique’ le 12 janvier 2013, à la question ‘’Vos propos semblent dégager le Président Biya de toute responsabilité dans la gestion des affaires du pays, et dans la vôtre en particulier’’ Marafa Hamidou Yaya répond :  « Non pas du tout, je ne l’exonère pas. Seulement, alors que tout le monde s’accorde pour connaitre en lui un habile politicien, il pose désormais des actes qui ne lui ressemblent guère, et qui créent dans notre pays une situation de tension sans précédent depuis 1984. Il ne me semble donc pas avoir les mains libres. Ce qui est déjà une faute extrêmement grave, il est vrai ».  Il ajoute : « A chaque fois, au cours de ces 30 ans, que Paul Biya a eu à choisir entre la modernisation politique et économique de notre pays avec les risques de perturbations inhérents à cette démarche, et l’immobilisme garant, selon lui, de la paix civile, il a choisi l’immobilisme. C’est ce qui fait que nous avons aujourd’hui un pays au bord des conflits sociaux et politiques sans précédents ». | | | | | | | | | | | | | |  |
|  | | |  |
|  | | |  |
|  | | |  |
|  | | |  | | | | | | | | | | | | | |  |
|  | | | | | | | | | | | | 4 |  | CP |  | 12/5/2022 2:02 AM |  |
|  | | | La proposition a été faite hier par Boris Johnson, Secrétaire d‘État des Affaires étrangères et du Commonwealth.  C‘était lors d’un entretien avec le Premier ministre camerounais, Philémon Yang, en marge du sommet du Commonwealth qui se tient depuis lundi à Londres.  « Il y a nécessité urgente de poursuivre le dialogue, la décentralisation et le respect des droits humains dans les régions anglophones comme l’a déjà commencé à faire le président Paul Biya.  Le Royaume-Uni soutiendra la paix, la prospérité et la sécurité pour nos amis au Cameroun », peut-on lire sur la page Twitter de Boris Johnson. | | | | | | | | | | | | | |  |
|  | | |  |
|  | | |  | | | | | | | | | | | | | |  |
|  | | | | | | | | | | | | 5 |  | CP |  | 12/5/2022 2:05 AM |  |
|  | | | Par la voix du porte-parole du secrétariat d’Etat américain, Heather Nauert, Washington estime que « Les recours à la force du gouvernement camerounais pour restreindre la liberté d’expression et l’Assemblée pacifique par les manifestants, sont inacceptables ».  Puis d’exhorter « le gouvernement du Cameroun à respecter les droits de l’homme et la liberté d’expression, y compris l’accès à Internet ». La Maison blanche invite enfin « toutes les parties à exercer une certaine contrainte à la violence et à engager un dialogue pour une résolution pacifique et durable » des divergences.  Pour Donald Trump « c’est l’aspiration profonde des peuples à la liberté et à la démocratie qui amène les régimes dictatoriaux à restreindre l’accès à Internet, détruire les antennes paraboliques, tirer sur les manifestants pacifiques non armés et emprisonner les réformateurs politiques. (..)  Les régimes oppresseurs ne peuvent durer pour toujours, et le jour viendra où les peuples seront confrontés à un choix, » avait lâché le 45è chef d’Etat américain. | | | | | | | | | | | | | |  |
|  | | |  |
|  | | |  | | | | | | | | | | | | | |  |
|  | | | | | | | | | | | | 6 |  | CP |  | 12/5/2022 2:07 AM |  |
|  | | | Suite à la proclamation des résultats de l’élection présidentielle au Cameroun par le Conseil Constitutionnel, l’Union européenne invite le Président élu à rallier toutes les parties prenantes, afin de surmonter, dans l’intérêt de tous les Camerounais, les défis auxquels le pays fait face.  Si les élections se sont globalement tenues dans le calme, une partie de la population n’a pas été en mesure de participer au vote.  L’UE rappelle sa préoccupation par rapport à la situation dans les régions du Nord-Ouest et du Sud-Ouest du pays. Il demeure important que les autorités soient à l’écoute des propositions de la société civile et des autorités religieuses pour une résolution pacifique et durable de la crise, et qu’un processus de dialogue soit lancé au plus tôt avec tous les acteurs en faveur de la paix. | | | | | | | | | | | | | |  |
|  | | |  |
|  | | |  | | | | | | | | | | | | | |  |
|  | | | | | | | | | | | | | | | | | |
| Reports\\Coding Summary By Source Report | | | | | | | | | | | Page 20 of 146 | | | | | | |
| 1/21/2023 3:45 PM | | | | | | | | | | | | | | | | | |
|  | | | **Classification** |  | **Aggregate** |  | **Coverage** |  | **Number Of Coding References** |  | | **Reference Number** |  | **Coded By Initials** |  | **Modified On** |  |
|  | | | | | | | | | | | | | | | | | |
|  | | | | | | | | | | | | 7 |  | CP |  | 12/5/2022 2:09 AM |  |
|  | | | Le Secrétaire général des nations Unies a été préoccupé par les incidents de sécurité dans le sud-ouest et nord-ouest du pays.  Lire les propositions d’António Guterres, Secrétaire général de l’Onu.  « Le Secrétaire général est profondément préoccupé par la situation au Cameroun, notamment au vu des récents incidents sécuritaires à Bamenda et à Douala et de la montée des tensions dans les régions du sud-ouest et du nord-ouest liées aux événements prévus le 1er octobre.  Le Secrétaire général a encouragé les autorités camerounaises à poursuivre leurs efforts pour résoudre les griefs de la communauté anglophone.  Il les exhorte à promouvoir des mesures de réconciliation nationale visant à trouver une solution durable à la crise, y compris en traitant ses causes profondes.  Le Secrétaire général souligne l’importance de faire prévaloir l’unité et l’intégrité territoriale du Cameroun et enjoint toutes les parties à s’abstenir d’actes susceptibles de mener à une escalade des tensions et de la violence. | | | | | | | | | | | | | |  |
|  | | |  |
|  | | |  | | | | | | | | | | | | | |  |
|  | | | | | | | | | | | | 8 |  | CP |  | 12/5/2022 11:26 PM |  |
|  | | | En visite à Bamenda, la semaine dernière, le Premier ministre camerounais, Joseph Dion Ngute, a réitéré l’engagement du président Paul Biya à mettre fin à la crise anglophone.  L’Etat ne va pas faire arrêter les présumés sécessionnistes qui accepteront volontairement de se rendre, selon le chef du gouvernement. | | | | | | | | | | | | | |  |
|  | | |  | | | | | | | | | | | | | |  |
|  | | | | | | | | | | | | 9 |  | CP |  | 12/5/2022 11:31 PM |  |
|  | | | Le nouveau président national du Parti Camerounais pour la Réconciliation Nationale (PCRN) a fait cette proposition au cours de l’émission Entretien Avec de ce jeudi 16 mai 2019, présenté par Dipita Tongo.  Lors de la visite du Premier Ministre, Chef du gouvernement à Bamenda pour annoncer le Dialogue prochain pour une sortie de crise dans les deux régions, anglophones, le Chairman du SDF s’est proposé d’être médiateur dans le cadre du dialogue. Quelques jours après, Cabral Libii se propose également comme médiateur au côté du Président national du SDF. « Je me propose aussi comme médiateur au côté de Ni John Fru Ndi pour régler cette crise…les séparatistes doivent déposer leurs armes et les soldats doivent retourner dans les casernes, l’État de son côté doit donc créer les conditions du dialogue », a déclaré le troisième à la dernière élection présidentielle de 2018 au Cameroun.  Au cours de l’émission Cabral Libii souligne qu’il reste jusqu’à présent le Coordonnateur national du mouvement onze millions de citoyens. Selon lui, « OMC est un mouvement apolitique qui accompagne les populations à s’inscrire sur les listes électorales et aide les jeunes à être des candidats pour les élections municipales et législatives peu importe la bannière politique ». | | | | | | | | | | | | | |  |
|  | | |  |
|  | | |  | | | | | | | | | | | | | |  |
|  | | | | | | | | | | | | 10 |  | CP |  | 12/5/2022 11:36 PM |  |
|  | | | Paul Biya a-t-il constaté que, relativement à la situation sociopolitique dans les régions du Nord-Ouest et du Sud-Ouest, son magistère politico-militaire s’est dilué au fil du temps ? La réponse est à lire dans la sortie (très médiatisée) de Chief Joseph Dion Ngute à Bamenda la semaine dernière. Sur la foi des propos rapportés sur Twitter par CRTV web le 10 mai 2019, le Premier ministre (PM) a déclaré que «le président de la République est prêt à organiser un dialogue formel pour résoudre la crise». Évitant à dessein de parler d’un quelconque compromis, l’envoyé spécial du chef de l’État a davantage implicitement parlé d’une décision unilatérale en forme de main tendue du président de la République. Il s’est résolu à ajuster son tir en infléchissant sa position face à une défiance devenue incontrôlable | | | | | | | | | | | | | |  |
|  | | |  | | | | | | | | | | | | | |  |
|  | | | | | | | | | | | | 11 |  | CP |  | 12/6/2022 12:08 AM |  |
|  | | | Il a appelé tous les habitants des buissons à déposer leurs armes et à se rendre à la table de dialogue. Le Premier ministre Dion Ngute a déclaré que la situation dans ces deux régions n’épargnait personne et qu’il était donc temps de donner une chance à la paix.  Ce mardi, le Premier ministre Dion Ngute tiendra une séance de travail d’une heure avec les responsables de l’administration et de la sécurité à partir de 14h00, les autorités administratives, les chefs des services de sécurité, les élites locales et extérieures du Sud-Ouest, les maires, les délégués gouvernementaux, les membres du L’Assemblée générale, et les sénateurs se rencontreront à tour de rôle pour rencontrer le Premier ministre. | | | | | | | | | | | | | |  |
|  | | |  | | | | | | | | | | | | | |  |
|  | | | | | | | | | | | | 12 |  | CP |  | 12/6/2022 12:12 AM |  |
|  | | | « Le président Paul Biya en tant que père, votre père, a compris que vous avez commis une erreur mais, il a décidé de vous accorder une seconde chance. Saisissez-la, parce que votre avenir est devant et il est prometteur » déclaration du Chef du gouvernement, rapportée par son chargé de communication Jean Pierre Ndzana.  Toujours selon ce dernier, Joseph DION NGUTE a aussi déclaré aux ex-combattants que le chef de l’Etat est pleinement disposé à ordonner un recrutement spécial en leur faveur.  Avant de quitter les lieux, le Premier ministre a fait savoir aux ex-combattants que Paul Biya, le Chef de l’Etat, les recevra bientôt, « dans les plus brefs délais » a précisé le chef du gouvernement. | | | | | | | | | | | | | |  |
|  | | |  |
|  | | |  | | | | | | | | | | | | | |  |
|  | | | | | | | | | | | | | | | | | |
| Reports\\Coding Summary By Source Report | | | | | | | | | | | Page 21 of 146 | | | | | | |
| 1/21/2023 3:45 PM | | | | | | | | | | | | | | | | | |
|  | | | **Classification** |  | **Aggregate** |  | **Coverage** |  | **Number Of Coding References** |  | | **Reference Number** |  | **Coded By Initials** |  | **Modified On** |  |
|  | | | | | | | | | | | | | | | | | |
|  | | | | | | | | | | | | 13 |  | CP |  | 12/6/2022 12:18 AM |  |
|  | | | Ceux-ci se disaient marginalisés et dominés par le système législatif et éducatif francophone. Ces protestations ont débouché sur des grèves puis dégénéré en affrontements meurtriers entre forces de sécurité camerounaises et partisans d’une sécession des Régions du Nord-Ouest et du Sud-Ouest. Pour répondre aux sollicitations des plaignants, Paul Biya le président de la République a créé le ministère de la Décentralisation et du développement local le 2 mars 2018. Question de permettre à ses concitoyens de participer davantage à la gestion de leurs affaires, notamment au niveau local.  Le chef de l’État a aussi procédé à la création de la Commission nationale pour la promotion du bilinguisme et du multiculturalisme (Cnpbm) dans l’optique de maintenir la paix et de consolider l’unité nationale. Il a créé, le 30 novembre 2018, le Comité national de désarmement, de démobilisation et de réintégration des ex-combattants de Boko Haram et des groupes armés du Nord-Ouest et du Sud-Ouest. Le Plan d’assistance humanitaire d’urgence d’un peu plus de 12,7 milliards de FCFA lancé le 20 juin 2018, la création de la section Common Law à la Cour suprême, la réforme de l’École nationale d’administration et de magistrature et la traduction en anglais des actes Ohada font aussi parties des réponses institutionnelles du gouvernement en vue d’une résolution pacifique de la crise. | | | | | | | | | | | | | |  |
|  | | |  |
|  | | |  | | | | | | | | | | | | | |  |
|  | | | | | | | | | | | | 14 |  | CP |  | 12/6/2022 12:56 AM |  |
|  | | | Le journal Mutations en kiosque le 26 mars 2019, rapporte qu’à l’occasion, «Paul Atanga Nji a remis des chapelets et des bibles à 27 ex-combattants des groupes sécessionnistes». En les rassurant qu’ils ne seront pas poursuivis par la justice et tous ceux qui, avec eux, vont déposer volontairement les armes. | | | | | | | | | | | | | |  |
|  | | |  | | | | | | | | | | | | | |  |
|  | | | | | | | | | | | | 15 |  | CP |  | 12/6/2022 11:33 PM |  |
|  | | | Les choses vont s’accélérer au Nord-Ouest et au Sud-Ouest, en vue de rétablir l’ordre et surtout de rassurer les populations.  – Une aide (pas chiffrée) sera apportée aux populations meurtries;  – Il ne sera plus permis aux forces de défense de se faire justice ou de filmer des arrestations;  – Toute exaction sera sévèrement punie;  – Sisiku Ayuk Tabe devra incessamment sous peu, demander aux populations armées de déposer les armes et de revenir sur la table des négociations;  – Possibilité de rencontrer le président autoproclamé de l’Ambazonie;  – Possibilité de libération de tous les prisonniers en vue d’un armistice pour aller vers la paix.  C’est l’ultime syncrétise imparable que nul ne peut contester. Ceux qui refuseront cette perche, d’autant plus que tout le monde appelle au dialogue, s’inscriront aux antipodes de la paix. Bien plus, ils comprendront que tout le monde s’inscrit en faux fasse aux idées sécessionnistes, refusées par toutes les Nations… | | | | | | | | | | | | | |  |
|  | | |  |
|  | | |  | | | | | | | | | | | | | |  |
|  | | | | | | | | | | | | 16 |  | CP |  | 12/7/2022 12:28 AM |  |
|  | | | La crise anglophone par exemple a été une des préoccupations de Gilles Thibaut. Qui a réitéré une position qui privilégie l’apaisement. « Moi je l’ai redit la nécessité d’un dialogue approfondi entre les différentes parties et quels que soient les camps, que la violence devait être absolument bannie », a-t-il dit au sortir de sa rencontre ave Paul Biya. Il faut dire que la situation dans les régions du Nord-Ouest et du Sud-Ouest inquiète au plus haut point la représentation diplomatique française à Yaoundé. | | | | | | | | | | | | | |  |
|  | | |  | | | | | | | | | | | | | |  |
|  | | | | | | | | | | | | 17 |  | CP |  | 12/7/2022 12:43 AM |  |
|  | | | Paul Biya a présenté les victimes comme des «gendarmes et (un) militaire courageux, dynamiques et dévoués à leurs missions».  Surtout que pour le chef de l’Etat ils «demeureront un exemple (…) dans la lutte pour la préservation de la paix et de l’intégrité territoriale». Le président de la République a surtout fait part de sa tristesse profitant de l’occasion pour dénoncer le «meurtre barbare» de ces militaires. | | | | | | | | | | | | | |  |
|  | | |  | | | | | | | | | | | | | |  |
|  | | | **Nodes\\Protest** | | | | | | | | | | | | | |  |
|  |  | No |  | 0.0013 |  | 1 |  | | | | | | |
|  | | |  |  |  |  |  |  |  |  | | | | | | | |
|  | | | | | | | | | | | | 1 |  | CP |  | 12/7/2022 12:53 AM |  |
|  | | | Des milliers d’habitants des régions anglophones sont descendus dans la rue, vendredi dernier, répondant ainsi à l’appel des leaders de la diaspora anglophone dont une bonne partie a également manifesté devant l’hôtel du chef de l’Etat, pendant son séjour new-yorkais.  Un mort annoncé du côté de Buéa, capitale de la région du Sud-Ouest, et un autre du côté de Bamenda, selon des sources locales, mais non encore confirmées ou infirmées par les autorités administratives…Des brigades attaquées, des voitures de police et de gendarmerie détruites ou arrachées des mains des éléments de la force de l’ordre, y compris l’attaque de certaines résidences, comme celle de Patrick Ekema, maire de la Commune de Buea, etc…A côté de ce sombre tableau, des interpellations de quelques manifestants, selon des riverains de certaines villes et campagnes des régions anglophones du pays. Tel est ce qu’on peut considérer comme étant le bilan provisoire des manifestations monstres qu’ont connues les régions du Sud-Ouest et du Nord-Ouest, dans la journée du vendredi 22 septembre dernier. Alors que le bilan officiel | | | | | | | | | | | | | |  |
|  | | |  |
|  | | |  | | | | | | | | | | | | | |  |
| Reports\\Coding Summary By Source Report | | | | | | | | | | | Page 22 of 146 | | | | | | |
| 1/21/2023 3:45 PM | | | | | | | | | | | | | | | | | |
|  | | | **Classification** |  | **Aggregate** |  | **Coverage** |  | **Number Of Coding References** |  | | **Reference Number** |  | **Coded By Initials** |  | **Modified On** |  |
|  | | | **Nodes\\Responsibility** | | | | | | | | | | | | | |  |
|  |  | No |  | 0.0226 |  | 13 |  | | | | | | |
|  | | |  |  |  |  |  |  |  |  | | | | | | | |
|  | | | | | | | | | | | | 1 |  | CP |  | 12/5/2022 2:18 AM |  |
|  | | | Certains sénateurs des États-Unis demandent instamment à leur gouvernement de suspendre toute aide à la sécurité au Cameroun, craignant que cette aide ne soit utilisée dans les régions du Nord-Ouest et du Sud-Ouest sans respecter les normes internationales des droits de l’homme.  Dans une déclaration datée du mardi 25 juin 2019, les sénateurs américains Dick Durbin (D-IL), Ben Cardin (D-MD), Chris Van Hollen (D-MD) et Tim Kaine (D-VA) ont présenté un amendement à la la Loi sur l’autorisation de la défense nationale (NDAA) pour l’exercice financier 2020, visant à mettre fin à toute aide américaine supplémentaire au Cameroun en matière de sécurité, à l’exception des relations avec Boko Haram, jusqu’à ce que les secrétaires américains à la Défense et à l’État certifient que les forces militaires et de sécurité du Cameroun ont démontré des progrès Le respect des normes internationales des droits de l’homme, en particulier en ce qui concerne la répression dans les régions anglophones du pays où, selon eux, des décennies de marginalisation de la population anglophone du pays ont conduit à des tensions latentes et à la répression exercée par le gouvernement. | | | | | | | | | | | | | |  |
|  | | |  |
|  | | |  | | | | | | | | | | | | | |  |
|  | | | | | | | | | | | | 2 |  | CP |  | 12/5/2022 2:30 AM |  |
|  | | | Le SDF tient le Président Paul Biya et ses collaborateurs pour responsables des conflits qui minent le Nord-Ouest et le Sud-Ouest. Il appelle de ce fait à la création d’un gouvernement par intérim pour juguler cette crise.  Le Président Paul Biya ne peut résoudre la crise anglophone. Il en est incapable! Cette position souvent défendue dans l’opinion publique est aussi celle du Social Democratic Front (SDF). Dans un communiqué daté du 09 juin, le parti de Ni John Fru Ndi soutient que «le régime de Paul Biya a clairement montré qu’il fait partie du problème pour lequel nous le tenons entièrement responsable».  Cette formation politique demande par conséquent «qu’un gouvernement de transition» soit mis en place pour mettre fin à «cette guerre civile qui détruit le socle de la nation». | | | | | | | | | | | | | |  |
|  | | |  |
|  | | |  | | | | | | | | | | | | | |  |
|  | | | | | | | | | | | | 3 |  | CP |  | 12/5/2022 2:40 AM |  |
|  | | | Alors que le Premier Ministre parle d’un dialogue ouvert à tous les sujets, sauf la sécession, le ministre de l’Administration Territoriale affirme que la forme de l’Etat est non négociable.  Au sujet du dialogue dans la crise anglophone, c’est la cacophonie dans la communication gouvernementale. En visite dans les régions du Nord-Ouest et du Sud-Ouest ces deux dernières semaines, le Premier Ministre a révélé la disponibilité du Président de la République à discuter avec les séparatistes de tous les sujets, exception faite de la sécession, a précisé Chief Dr Joseph Dion Ngute.  Traduction, le pouvoir de Yaoundé est désormais prêt à mettre le sujet du fédéralisme sur la table des discussions. Pourtant, revenant sur cette visite, le ministre de l’Administration Territoriale (MINAT) a fait des déclarations en totale contradiction avec celles de son Premier Ministre. «Le Chef de l’Etat est prêt à discuter de tout sauf de la forme de l’Etat», a dit Paul Atanga Nji sur les antennes de la CRTV radio et la chaîne de télévision France 24. En d’autres termes, il n’y aura pas de dialogue autour du fédéralisme. | | | | | | | | | | | | | |  |
|  | | |  |
|  | | |  | | | | | | | | | | | | | |  |
|  | | | | | | | | | | | | 4 |  | CP |  | 12/5/2022 11:21 PM |  |
|  | | | Le ministre de la Défense a réagi le 15 mai à l’attaque un petit village dans le département de Bafut, région du Nord-ouest du Cameroun.  Joseph Beti Assomo, rapporte que, « dans la mi-journée du mercredi 15 mai, deux soldats roulant à motocyclette dans la ville de Bamenda, ont été sauvagement et lâchement assassinés pas des terroristes embusqués dans des habitations lieu-dit Alachu/Bafut ».  En guise de représailles, les militaires lancés à la poursuite des séparatistes, « ont été pris à partie par de nombreuses personnes non identifiées et violentes », ajoute le communique qui explique que « la confusion a provoqué des échauffourées avec destructions des biens et incendies de quelques maisons »  L’équipe d’intervention allait boucler et ratisser la zone.  Le ministre de la Défense informe qu’une enquête a été ouverte pour faire la lumière et déterminer les auteurs des destructions de biens. | | | | | | | | | | | | | |  |
|  | | |  |
|  | | |  | | | | | | | | | | | | | |  |
|  | | | | | | | | | | | | 5 |  | CP |  | 12/5/2022 11:33 PM |  |
|  | | | Tibor Nagy en remet une couche! Le sous-secrétaire d’Etat américain aux Affaires africaines était devant le Congrès des Etats-Unis ce jeudi 16 mai 2019. Il a vertement critiqué la gestion de la crise anglophone par le régime de Paul Biya. «Le gouvernement camerounais n’a rien fait pour résoudre le conflit. L’armée continue de brûler des villages, tandis que des civils sans défense sont obligés de fuir dans les buissons», a indiqué le diplomate américain.  «Les États-Unis doivent redoubler leurs efforts pour mettre fin au conflit», a martelé Tibor Nagy, confirmant la position de son pays qui ne serait pas contre une intervention de la communauté internationale pour mettre un terme à la crise qui secoue les régions anglophones du Nord-Ouest et du Sud-Ouest, depuis octobre 2016.  Une crise qui a fait, selon un récent rapport de International Crisis Group, au moins 1850 morts et plus de 530 000 déplacés internes, sans compter les milliers de déplacés externes. Selon les Nations Unies, cette crise qui s’est muée en conflit armé entre les milices séparatistes et les forces gouvernementales depuis près de 20 mois, a aggravé les besoins humanitaires qui touchent désormais 8 régions sur 10 du pays. | | | | | | | | | | | | | |  |
|  | | |  |
|  | | |  | | | | | | | | | | | | | |  |
| Reports\\Coding Summary By Source Report | | | | | | | | | | | Page 23 of 146 | | | | | | |
| 1/21/2023 3:45 PM | | | | | | | | | | | | | | | | | |
|  | | | **Classification** |  | **Aggregate** |  | **Coverage** |  | **Number Of Coding References** |  | | **Reference Number** |  | **Coded By Initials** |  | **Modified On** |  |
|  | | | | | | | | | | | | | | | | | |
|  | | | | | | | | | | | | 6 |  | CP |  | 12/6/2022 12:13 AM |  |
|  | | | Ce rappel est contenu dans une résolution du Sénat américain sur la situation sociopolitique au Cameroun.  Les élus américains ont exprimé leurs préoccupations sur la détérioration de la situation sociopolitique au Cameroun.  Dans une résolution adoptée ce 10 mai 2019, le Sénat des Etats-Unis focalise ses inquiétudes sur la crise anglophone et les obstructions répétées aux libertés, notamment l’incarcération de l’un des principaux opposants au régime de Yaoundé, Maurice Kamto, incarcéré depuis le mois de janvier 2019 avec une centaine de ses partisans.  Pour les sénateurs américains, les « États-Unis continuent de tenir le gouvernement du Cameroun pour responsable du respect des droits de tous les citoyens, quelles que soient leurs opinions ou convictions politiques ou la région dans laquelle ils résident, conformément aux obligations internationales du Cameroun et à la propre Constitution du Cameroun ».  Le Sénat américain condamne les violences dans les régions anglophones et appelle « le gouvernement camerounais et les groupes armés à respecter les droits humains de tous les citoyens camerounais, à mettre un terme à toutes les violences et à engager un dialogue large, sans condition préalable, pour résoudre le conflit dans les régions du Nord-Ouest et du Sud-Ouest ».  La Chambre des représentants des Etats-Unis demande d’« engager un dialogue élargi sans condition préalable et faire un effort de foi crédible pour travailler avec les chefs religieux et communautaires de la région anglophone afin de régler les griefs et de rechercher des solutions non violentes pour résoudre les conflits et des réformes constitutionnelles susceptibles de protéger les préoccupations des minorités ». | | | | | | | | | | | | | |  |
|  | | |  |
|  | | |  |
|  | | |  | | | | | | | | | | | | | |  |
|  | | | | | | | | | | | | 7 |  | CP |  | 12/6/2022 12:18 AM |  |
|  | | | Le 24 janvier 2017, le cardinal Christian Tumi, sur les ondes de Radio France internationale, a accusé le gouvernement de ne pas faire assez pour que le calme revienne en zone anglophone. «Il faut que Yaoundé dialogue», avait-il lâché dans le cadre du programme Invité d’Afrique. «La jeunesse, qui n’était pas encore sensibilisée à la réunification, commence à protester sur les conditions de travail, les conditions de vivre ensemble, et ils veulent qu’on retourne où on était au début de la réunification, c’est-àdire au fédéralisme. Le pouvoir central ne veut plus de cela. Donc c’est là où nous sommes et il y a la tension, la tension», précisait l’ancien archevêque de Douala, originaire du Cameroun anglophone.  La figure morale regrettait la tentative d’étranglement du système éducatif anglophone. «Il y a des professeurs du Cameroun francophone qui enseignent au Cameroun anglophone, sans avoir une maitrise de l’anglais». Quid de la justice et des autres corps de l’administration ? Réponse du Cardinal : «Au Cameroun anglophone, on peut avoir des juges qui ne connaissent pas l’anglais et qui rendent leur jugement en français. Les gens ne comprennent rien. Prenons par exemple là où je me trouve, le préfet, le sous-préfet et le premier adjoint sont tous francophones, dans une région qui est peuplée à 99% d’anglophones».  Et face à la fermeté du gouvernement qui veut restaurer l’ordre républicain, Christian Tumi archevêque émérite de Douala qui ne dit mot sur la mise à sac et les incendies criminels d’écoles, hôpitaux et autres édifices publics perpétrés par des partisans d’une pseudo République de l’Ambazonie s’offusque: «Quand on réprime, ce n’est pas une solution. Il faut essayer de les convaincre, même s’il y a au noyau qui va à l’extrême pour demander la séparation totale. Les extrémistes, il y en aura toujours. Mais la majorité des anglophones veulent qu’on retourne là où on était, c’est-àdire au fédéralisme…». | | | | | | | | | | | | | |  |
|  | | |  |
|  | | |  |
|  | | |  | | | | | | | | | | | | | |  |
|  | | | | | | | | | | | | 8 |  | CP |  | 12/6/2022 12:29 AM |  |
|  | | | Je viens de OKOYONG mais je suis né et j’ai grandis à Mamfe. J’étais un général dans le gouvernement internet d’Ambazonie. Je veux demander pardon pour tous les crimes que j’ai commis dans le département de la Manyu, au moins à une bonne partie de ce département. J’ai commis trop d’atrocités que vous ne pouvez même pas imaginer. La plupart de vous ici en sont victimes. J’étais le commanditaire de toutes les atrocités commises ici. J’ai assuré le succès des villes mortes ici. Je m’en chargeais personnellement de ceux qui ne respectaient pas mes ordres de villes mortes. Parfois je donnais des ordres à mes éléments de le faire à mon absence. Mon intention au départ n’était pas de devenir un Général ambazonien. On m’avait convaincu et j’ai été formé 6 mois avant le début de la crise. Malheureusement je ne voyais pas mon avenir dans ce combat et j’ai décidé de deposer les armes. Les populations, mon peuple, se plaignaient chaque jour et cela me rendais triste. J’étais en contact (en ligne, par internet) avec un monsieur qui a pris le temps de me convaincre de deposer mes armes. Je me suis rendu à la Brigade d’Intervention Rapide, BIR, et depuis lors je me sens libéré. Ceci grâce au gouvernement et à un certain monsieur dénommé Mr Genesis. Je ne l’ai jamais vu mais on est toujours en communication via le net.  Je veux dire aux populations ici présentes que nous avons réussi à commettre ces crimes parce que vous étiez de connivence avec nous. Je crois fermement que si nous tous, nous travaillons main dans la main, en trois mois au maximum, ensemble nous allons mettre fin à cette guerre inutile.  Je dis que vous êtes de connivence par ce que pour attaquer Mamfe par example il nous fallait passer au moins 3 jours dans la ville et c’est vous qui nous hébergiez. On dormait dans vos maisons sans même nous connaitre. Vos voisins nous voyaient mais n’osaient même pas lever le petit doigt. Ils avaient peur. | | | | | | | | | | | | | |  |
|  | | |  |
|  | | |  |
|  | | |  | | | | | | | | | | | | | |  |
|  | | | | | | | | | | | | | | | | | |
| Reports\\Coding Summary By Source Report | | | | | | | | | | | Page 24 of 146 | | | | | | |
| 1/21/2023 3:45 PM | | | | | | | | | | | | | | | | | |
|  | | | **Classification** |  | **Aggregate** |  | **Coverage** |  | **Number Of Coding References** |  | | **Reference Number** |  | **Coded By Initials** |  | **Modified On** |  |
|  | | | | | | | | | | | | | | | | | |
|  | | | | | | | | | | | | 9 |  | CP |  | 12/6/2022 12:58 AM |  |
|  | | | En appliquant la tactique de la terre brulée, les soldats obligent le gouvernement à se défendre d’accusations d’exactions dans les régions du Nord-Ouest et du Sud-Ouest.  Le jeudi 21 février, le ministre de la Communication du Cameroun se fend d’un « communiqué de presse » dans lequel il vole au secours de l’armée. Celle-ci est en effet accusée par des ONG internationales d’avoir incendié des maisons d’habitation dans les environs de Kumbo, une ville de la région du Nord-Ouest, dans le cadre de la crise anglophone.  « Le gouvernement dément formellement ces allégations et tient à préciser que les forces de défense et de sécurité présentes dans cette région en proie aux attaques régulières des hordes de sécessionnistes ont essentiellement vocation à assurer la protection du territoire national ainsi que celle des personnes et des biens » pose d’emblée René Emmanuel Sadi.  Des unités de l’armée sont accusées d’user de la tactique de la terre brulée, en incendiant maisons, écoles, marchés, villages et même hôpitaux. Des témoignages d’habitants des régions ont souvent fait état de ce que des soldats mènent régulièrement des descentes dans des formations sanitaires et interpellent durement le personnel sur des combattants qui y recevraient des soins. « Nous sommes sous pression », avait confié un responsable médical de l’hôpital de Shisong, à Bamenda, sans dire davantage sur d’où vient cette pression.  La sortie du ministre de la Communication laisse entendre en filigrane que les témoignages ne | | | | | | | | | | | | | |  |
|  | | |  |
|  | | |  |
|  | | |  | | | | | | | | | | | | | |  |
|  | | | | | | | | | | | | 10 |  | CP |  | 12/6/2022 1:09 AM |  |
|  | | | Si l’enjeu de la crise est l’accès ou le contrôle des richesses, le débat sur la forme de l’Etat porte en réalité sur la gouvernance de cet Etat. Les mêmes problèmes sont soulevés d’un auteur à l’autre. Nouaham Kenmogne établit le diagnostic le plus complet : des gouvernants distants des attentes et  aspirations des populations, une absence d’initiative et d’anticipation gouvernementales, la déconfiture des entreprises publiques, l’inertie et les lenteurs dans la mise en oeuvre des reformes et des projets, le taux élevé des détournements de fonds publics et le gaspillage des ressources budgétaires, le faible taux d’accès aux services sociaux de base, un taux élevé de chômage, le faible taux d’attractivité des investisseurs privés, l’aggravation de la pauvreté, un développement régional déséquilibré, la zombification et la vassalisation des citoyens, la perte de confiance des jeunes en l’Etat, combiné à la perte de leur amour propre, l’apparition au sein de la population de sentiments de défaitisme, de fatalisme et de résignation, l’aggravation du tribalisme et la perte de la solidarité citoyenne, l’étouffement de la démocratie avec pour corollaire la disparition de l’expression plurielle au profit de la pensée monolithique. C’est de ce mélodrame que sont nées les revendications de la minorité anglophone. Celle-ci rejette sur la majorité francophone la responsabilité de la mal gouvernance de l’Etat.  Le socio-démographe Narcis Bangmo propose alors le concept de « colonialophonie », pour comprendre la cristallisation de l’opposition  Anglophone/Francophone. La colonialophonie est l’expression du repli identitaire du Camerounais anglophone. Celui-ci revendique une « identité  heureuse » qui serait le produit de la colonisation britannique, contrairement à la colonisation française qui aurait été malheureuse et serait la source des problèmes de gouvernance au Cameroun. Les faits, selon le chercheur, indiquent que la colonisation britannique a produit une culture, ainsi que des traditions institutionnelles, administratives, managériales, etc. Bref, elle a façonné une manière de faire, de vivre et de raisonner. L’anglophonie a fini par prendre les allures d’une ethnie. Pour en être membre, il ne suffit de parler anglais ou d’avoir étudié dans le sous-système éducatif anglophone. Si cette identité a été artificiellement créée et entretenue par une élite politique, il n’en demeure pas moins vrai qu’il existe une volonté populaire chez les Anglophones de parler d’une même voix indépendamment de leurs différences ethniques antérieures à la colonisation britanniques. Dans leur combat pour une cause qui semble | | | | | | | | | | | | | |  |
|  | | |  |
|  | | |  |
|  | | |  |
|  | | |  | | | | | | | | | | | | | |  |
|  | | | | | | | | | | | | 11 |  | CP |  | 12/6/2022 1:57 AM |  |
|  | | | Réunis samedi dernier à Yaoundé à l’effet de trouver des voies et moyens pour le retour de la paix, de la stabilité et du dialogue, ces hommes et femmes croient dur comme fer que la radicalisation de la guerre qui secoue la zone anglophone du pays est en grande partie, le fruit d’une conspiration de l’élite du Nord-Ouest.  C’était une réunion de famille qui ne s’est pas encombrée d’un ramdam médiatique susceptible d’attirer des regards indiscrets ou encore moins, des « personnes indésirables ». Une espèce d’arbre à palabre au palais des Congrès de Yaoundé qui a permis à certaines élites et autres ressortissants de la région du Sud-Ouest de constater pour le déplorer, non seulement la violence qui continue de sévir dans cette partie du territoire camerounais mais aussi certaines batailles souterraines instrumentées, disent-ils, par leurs propres frères. L’ouverture sur le Cameroun. Conscient qu’après l’étape des édifices publics et des symboles de l’Etat, ce sont désormais les fonctionnaires qui font l’objet des traques et des battues par des personnes décidées à faire basculer les régions anglophones entre les mains des soldats de l’ombre de la république virtuelle d’Ambazonie, ces chefs traditionnels et autres forces vives se sont donné le devoir de faire une analyse froide de la situation chaotique dont sont victimes les populations désormais sous le joug de ces agitateurs. | | | | | | | | | | | | | |  |
|  | | |  |
|  | | |  | | | | | | | | | | | | | |  |
|  | | | | | | | | | | | | | | | | | |
| Reports\\Coding Summary By Source Report | | | | | | | | | | | Page 25 of 146 | | | | | | |
| 1/21/2023 3:45 PM | | | | | | | | | | | | | | | | | |
|  | | | **Classification** |  | **Aggregate** |  | **Coverage** |  | **Number Of Coding References** |  | | **Reference Number** |  | **Coded By Initials** |  | **Modified On** |  |
|  | | | | | | | | | | | | | | | | | |
|  | | | | | | | | | | | | 12 |  | CP |  | 12/6/2022 11:50 PM |  |
|  | | | Dans un rapport dont le Messager a obtenu copie, la Commission africaine des droits humains et des peuples, somme le gouvernement camerounais de répondre des abus dont ont été victimes Paul Ayah Abine et certains cadres du parti pour l’action du peuple (pap) depuis le début des mouvements de rébellion dans les régions anglophones du pays.  Huit pages d’une densité incroyable. Un volumineux document articulé autour d’un impressionnant exposé des faits et des incidences reposant sur des termes procéduriers puisés non seulement dans la Charte des Droits de l’Homme et des Libertés mais aussi des textes fondamentaux régissant la Commission africaine des droits humains et des peuples dont la dernière session extraordinaire remonte au 22 février dernier à Banjul en Namibie. Le rapport (rédigé en anglais) de cet organisme relatif à ce qui est en droit d’être baptisé « l’affaire Pap contre l’Etat du Cameroun », est en quelque sorte, le résumé du calvaire de Paul Ayah Abine et de certains camarades du parti, devenus sans le vouloir, des victimes otages d’un régime frileux qui fait feu de tout bois pour tenter d’étouffer Les véritables raisons de la crise anglophone. Pourchassés, acculés, pris pour cible et injustement accusés d’avoir contribué à l’enlisement de la situation sociale qui embrase les régions du Nord-Ouest et du Sud-Ouest, tel qu’ils le décrivent, les plaignants qui ont saisi l’instance en janvier dernier pour dénoncer les abus dont ils sont victimes, ont exigé réparation. | | | | | | | | | | | | | |  |
|  | | |  |
|  | | |  | | | | | | | | | | | | | |  |
|  | | | | | | | | | | | | 13 |  | CP |  | 12/7/2022 12:56 AM |  |
|  | | | Le 30 août dernier, le président de la République a fait le choix de l’apaisement et de la décrispation au sujet de la situation dans les régions anglophones, en ordonnant l’arrêt des poursuites pendantes devant le tribunal militaire de Yaoundé contre un certain nombre d’acteurs de la mobilisation anglophone.  L’on ignore sur quelles bases certaines autres personnes n’ont pas bénéficié du pardon du chef de l’Etat, mais l’on est fondé de saluer à sa juste mesure l’acte présidentiel.  La facture de la crise anglophone est déjà assez lourde sur le plan de l’éducation et, plus largement, sur le plan socio-économique, pour qu’on ose se soustraire aux solutions | | | | | | | | | | | | | |  |
|  | | |  |
|  | | |  | | | | | | | | | | | | | |  |
|  | | | **Nodes\\Security and Defense** | | | | | | | | | | | | | |  |
|  |  | No |  | 0.0057 |  | 5 |  | | | | | | |
|  | | |  |  |  |  |  |  |  |  | | | | | | | |
|  | | | | | | | | | | | | 1 |  | CP |  | 12/5/2022 1:02 AM |  |
|  | | | Suite à des affrontements entre séparatistes et forces de défense, dans cette commune de la région du Sud-Ouest, les victimes ont été délivrées, nous apprend Canal 2 International au cours de son journal télévisé de 20 h ce lundi.  Coup de force réussie par l’armée camerounaise à Alou, dans le département du Lebialem (Sud-Ouest). Alors que les kidnappings des 60 personnes n’avaient été revendiqués par aucune secte terroriste, les forces de défense et de sécurité ont mené des investigations. Des initiatives qui s’avèrent payantes. Moins de 24 heures après les enlèvements, 25 otages ont été délivrés au cours des affrontements entre l’armée régulière et les séparatistes. Les 35 autres ont pu respirer l’air de la liberté quelques heures plus tard. | | | | | | | | | | | | | |  |
|  | | |  | | | | | | | | | | | | | |  |
|  | | | | | | | | | | | | 2 |  | CP |  | 12/5/2022 2:00 AM |  |
|  | | | D’abord, il faut se parler. Ensuite, il est impératif de ramener les choses au plus prêt de la situation telle qu’elle l’était il y a deux ans, c’est-à-dire libérer les détenus, les amnistier et mettre en place les conditions nécessaires pour le désarmement. Et ce n’est pas cette armée qui le fera, il faut donc trouver un tiers. Comme la Belgique, le Canada, la Suisse, ou un pays qui n’est pas partie prenante, vu que certains sont réticents à une intervention de l’ONU.  Ce pays devra accepter de venir avec une force tampon qui se déploiera dans les zones en crise et procédera au désarmement. Ensuite, il devra passer à la réhabilitation et à la reconstruction des villages et faire revenir les habitants chez eux. Il faut qu’on essaye au maximum de revenir au statu quo ante. Lorsqu’on l’aura fait, on pourra alors commencer à attaquer les questions globales du cadre dans lequel nous souhaitons vivre »  Pas du tout. Je décline une stratégie nationale de réconciliation. | | | | | | | | | | | | | |  |
|  | | |  |
|  | | |  | | | | | | | | | | | | | |  |
|  | | | | | | | | | | | | | | | | | |
|  | | | | | | | | | | | | | | | | | |
| Reports\\Coding Summary By Source Report | | | | | | | | | | | Page 26 of 146 | | | | | | |
| 1/21/2023 3:45 PM | | | | | | | | | | | | | | | | | |
|  | | | **Classification** |  | **Aggregate** |  | **Coverage** |  | **Number Of Coding References** |  | | **Reference Number** |  | **Coded By Initials** |  | **Modified On** |  |
|  | | | | | | | | | | | | | | | | | |
|  | | | | | | | | | | | | 3 |  | CP |  | 12/5/2022 2:37 AM |  |
|  | | | D’après l’organisation, l’attaque du 15 mai 2019 a été coordonnée par des militaires de l’Armée de l’air et du Bataillon d’Intervention Rapide (BIR).  « Des militaires camerounais ont semé la terreur dans la région anglophone du Nord-Ouest le 15 mai 2019, incendiant plus de 70 habitations à Mankon, dans l’agglomération de Bamenda », a souligné Human Rights Watch (HRW) dans un rapport publié jeudi 23 mai 2019.  « Des militaires ont notamment traîné de force un homme hors de chez lui avant de l’abattre dans la rue », poursuit l’organisation qui se donne pour mission de défendre les droits de l’homme et le respect de la Déclaration universelle des droits de l’homme.  Sur ces violations commises à Mankon dans la région du Nord-Ouest, HRW voudrait qu’une enquête soit menée « promptement et de manière indépendante et impartiale, mais elle ne devrait pas s’arrêter là. Le gouvernement devrait immédiatement examiner les autres incidents lors desquels ses forces de sécurité sont accusées d’avoir commis des abus et en poursuivre les responsables en justice. »  Des témoins qui se sont entretenus avec les observateurs de HRW, ont décrit comment « des militaires de l’Armée de l’air et du Bataillon d’Intervention Rapide (BIR) avaient coordonné l’attaque » qui s’est soldée par les incendies de maisons et les destructions de biens à Mankon.  L’Organisation Non-Gouvernementale rapporte aussi qu’elle a également examiné « des images satellite qui montrent plus de 70 bâtiments touchés par l’incendie, ainsi que des photos et des vidéos montrant des destructions importantes de biens » le 15 mai dernier. | | | | | | | | | | | | | |  |
|  | | |  |
|  | | |  |
|  | | |  | | | | | | | | | | | | | |  |
|  | | | | | | | | | | | | 4 |  | CP |  | 12/6/2022 12:41 AM |  |
|  | | | Pour le peuple camerounais ce serait mieux qu’on s’arrête pour faire l’état des lieux un moment.  Et savoir que ceci n’est profitable pour personne. Que ce soit la situation avec Boko Haram, que ce soit la situation dans les zones anglophones. je vous en prix mes chers frères faisons la paix. C’est notre richesse la paix au Cameroun. toutes les tributs que ce soit du Nord au Sud, de l’Est à l’Ouest nous sommes tous camerounais.  Posons les armes pour ceux qui en ont. C’est vrai que nous on le vit de très loin parce qu’on est à Douala ou alors en Europe, mais je peux vous rassurer que on n’est touché. J’espère par mon humble voix que ça pourra faire échos la ou il faut et que nous retrouvions le Cameroun qu’on n’a toujours connu. | | | | | | | | | | | | | |  |
|  | | |  |
|  | | |  | | | | | | | | | | | | | |  |
|  | | | | | | | | | | | | 5 |  | CP |  | 12/7/2022 12:16 AM |  |
|  | | | A la fin du meeting, Paul Atanga Nji a demandé aux jeunes qui se cachent dans la forêt, ou sont dans les rangs des ambazoniens, de sortir de la brousse et de rentrer chez eux. « Je suis venu avec le message de paix, d’unité et de dialogue du chef de l’Etat. Il est important de comprendre que le Cameroun est une nation indivisible », a-t-il lancé d’emblée aux médias.  Le ministre a ajouté que le gouvernement était prêt à dialoguer, mais dans le respect de l’unité du Cameroun. « On peut résoudre le problème sans avoir à détruire. Le gouvernement est prêt à dialoguer, mais uniquement avec ceux qui recherchent l’unité du Cameroun | | | | | | | | | | | | | |  |
|  | | |  | | | | | | | | | | | | | |  |
|  | | | **Nodes\\Violence** | | | | | | | | | | | | | |  |
|  |  | No |  | 0.0293 |  | 20 |  | | | | | | |
|  | | |  |  |  |  |  |  |  |  | | | | | | | |
|  | | | | | | | | | | | | 1 |  | CP |  | 12/5/2022 12:54 AM |  |
|  | | | D’après les informations recueillies ce jour, une femme enceinte est décédée en captivité dans le Nord-Ouest.  Il s’agit de la jeune Robertine LEINYUY. Celle-ci avait été kidnappée par des hommoes armés, appartenant certainement aux mouvements sécessionnistes, il y a quelques semaines dans le village Ntseny dans le département du Bui. Arrêtée en compagnie de 02 autres dames, elle était accusée d’être une informatrice des forces de sécurité. Âgée de 24 ans, l’otage a été torturée à mort par ses ravisseurs alors même que ses 02 autres compagnes d’infortune ont été relâchées | | | | | | | | | | | | | |  |
|  | | |  | | | | | | | | | | | | | |  |
|  | | | | | | | | | | | | 2 |  | CP |  | 12/5/2022 1:01 AM |  |
|  | | | Le corps sans vie de la victime a été découvert le mardi 4 août 2020, sous le port du département de la Mezam.  Une découverte macabre mardi dernier dans la région du Nord-Ouest, et plus précisément sous le pont de la Mezam. Il s’agit du corps sans vie d’une adolescente qui se prénommait Trésor et qui menait une activité génératrice de revenus au marché centrale de Bamenda.  Dans une vidéo virale qui circule actuellement sur les réseaux sociaux, il est déplorable de constater que son cou est complètement tranché. | | | | | | | | | | | | | |  |
|  | | |  | | | | | | | | | | | | | |  |
|  | | | | | | | | | | | | 3 |  | CP |  | 12/5/2022 1:04 AM |  |
|  | | | Les séparatistes ont kidnappé plus de dix personnes, dans la région du Sud-Ouest, le mardi 14 juillet 2020.  Nouveaux kidnapping au Sud-Ouest du pays. Une dizaine de personnes ont été enlevées dans le département du Lebialem, plus précisément dans la localité de Alo. Les civils ont été pris en otage lorsqu’ils se trouvaient dans une buvette d’alcool traditionnel. | | | | | | | | | | | | | |  |
|  | | |  | | | | | | | | | | | | | |  |
|  | | | | | | | | | | | | | | | | | |
| Reports\\Coding Summary By Source Report | | | | | | | | | | | Page 27 of 146 | | | | | | |
| 1/21/2023 3:45 PM | | | | | | | | | | | | | | | | | |
|  | | | **Classification** |  | **Aggregate** |  | **Coverage** |  | **Number Of Coding References** |  | | **Reference Number** |  | **Coded By Initials** |  | **Modified On** |  |
|  | | | | | | | | | | | | | | | | | |
|  | | | | | | | | | | | | 4 |  | CP |  | 12/5/2022 1:07 AM |  |
|  | | | Depuis le mercredi 03 juin 2020, la vidéo d’un pasteur, qui a été enlevé et se fait torturer par des sécessionnistes, fait le tour des réseaux sociaux.  Les images ont été tournées à Batibo (département de la Momo, région du Nord-Ouest). Elles montent un homme ligoté, qui est torse nu et vêtu d’un pantalon noir. En regardant minutieusement la vidéo qui dure un peu plus de trois minutes, on peut s’apercevoir que la victime est le pasteur Theopilus de l’Eglise Presbytérienne de Batibo. Cette vidéo révèle des échanges houleux en langues anglaise et pidgin.  Les bourreaux reprochent au chrétien sa participation au grand dialogue national. L’homme de Dieu implore ses kidnappeurs qui lui réclament ce qu’il a ramené du dialogue national. Ils lui reprochent également d’être prêt des militaires qui auraient trouvé refuge dans la maison de Dieu. Dans la même vidéo, les ravisseurs armés font savoir qu’ils entendent tout de même libérer l’otage à une seule condition : bénéficier d’une rançon de 2,5 millions Francs. | | | | | | | | | | | | | |  |
|  | | |  |
|  | | |  | | | | | | | | | | | | | |  |
|  | | | | | | | | | | | | 5 |  | CP |  | 12/5/2022 2:10 AM |  |
|  | | | NGALA Elvis c’est son nom.  Gardien de la paix de 2e grade, Il est tombé hier 15 août 2019 dans la soirée à mile 90 à Bamenda suite à une attaque de la patrouille à laquelle il participait, par des forces indépendantistes anglophones, nous confie une source policière.  D’après les témoignages de certaine personnes, plusieurs hôtels dans les ville de Buea, Mutenguene et Kumba sont envahis par les militaires vêtus en civil.  Rappelons que la crise socio-politique anglophone fait déjà, depuis 3 ans qu’elle dure fait environ 2 000 morts et des milliers de déplacés internes et externes. | | | | | | | | | | | | | |  |
|  | | |  |
|  | | |  | | | | | | | | | | | | | |  |
|  | | | | | | | | | | | | 6 |  | CP |  | 12/5/2022 2:15 AM |  |
|  | | | L’officier du BIR, Nsangou Salim a été tué ce jeudi 4 juillet par des combattants séparatistes à Bamenda dans la région du Nord-Ouest. Selon des informations, l’officier du Bataillon d’Intervention Rapide a été assassiné devant son épouse et ses enfants.  Votre journal a appris avec consternation, l’assassinat hier jeudi 04 juillet 2019, d’un officier de l’Armée camerounaise.  L’officier du Bir Nsangou Salim, a été tué par de présumés séparatistes, en présence de son épouse ( voir photo du couple), et de ses enfants, et ce, à Bamenda, dans la région du Nord-Ouest du Cameroun.  Pour le moment, les circonstances de cette fin de vie tragique et choquante de l’officier, demeurent encore voilées.  Aucune communication n’a encore été faite à ce sujet, par le gouvernement camerounais. | | | | | | | | | | | | | |  |
|  | | |  |
|  | | |  | | | | | | | | | | | | | |  |
|  | | | | | | | | | | | | 7 |  | CP |  | 12/5/2022 2:16 AM |  |
|  | | | Les corps d’une femme enceinte et d’une jeune fille ont été découverts hier mercredi 26/06/2019 par des villageois en état de décomposition au lieu dit Small Ekombe, à Mbongue, en proie à un conflit sur fond de revendications séparatistes entre l’armée camerounaise et les terroristes séparatistes armées anglophone.  D’après les habitants de ce village, elles auraient été violées puis tuées. Le doigt accusateur est pointé par ces derniers sur sécessionnistes anglophone semant terreur et désolation dans cette | | | | | | | | | | | | | |  |
|  | | |  | | | | | | | | | | | | | |  |
|  | | | | | | | | | | | | 8 |  | CP |  | 12/6/2022 12:39 AM |  |
|  | | | En dépit de la mise au point de la direction du parti, doutes et curiosités entourent l’enlèvement et la libération du président du Social Democratic Front samedi 27 avril.  Le Social Democratic Front (SDF) n’en avait pas encore fini avec l’enlèvement de sa sénatrice la veille, suivi de sa libération quelques heures après. Que samedi 27 avril, le parti devait gérer le kidnapping de son président-fondateur, Ni John Fru Ndi. Alors que la rumeur fait le buzz sur les réseaux sociaux depuis plusieurs heures, il faudra attendra 15h49 pour que le SDF communique enfin. « Le chairman Ni John Fru Ndi a été enlevé par des ravisseurs ce matin à Kumbo. Le président national du SDF était à la tête d’un cortège qui accompagnait la dépouille du député Joseph Banadzem, président du groupe parlementaire du SDF à l’Assemblée nationale, à sa dernière demeure. Il était en compagnie de plusieurs autres responsables du parti », note un communiqué signé de Jean Robert Wafo, ministre du Shadow cabinet en charge de l’information et des médias. Pour un enlèvement qui a eu lieu le matin sans autre précision sur l’heure, il faut dire que la communication du SDF a perdu du temps, au point que d’autres sources l’ont grillée en annonçant l’événement de longues heures plus tôt.  La communication sur la libération de Ni John Fru Ndi entretient aussi la controverse. Mark Bareta, figure bien connue des milieux séparatistes, publie un message sur sa page Facebook à 16h07mn qui vient jeter le doute dans les esprits : « Selon nos informations, Fru Ndi n’a pas été kidnappé. Il a été retenu pour une brève discussion alors qu’il traversait le territoire contrôlé par les combattants ambazoniens. Il a été relaxé et autorisé à poursuivre son voyage ». Il donne l’impression d’être sûr de son information, lui qui a pourtant soutenu, deux heures auparavant, que le président du SDF avait été kidnappé. | | | | | | | | | | | | | |  |
|  | | |  |
|  | | |  |
|  | | |  | | | | | | | | | | | | | |  |
|  | | | | | | | | | | | | | | | | | |
| Reports\\Coding Summary By Source Report | | | | | | | | | | | Page 28 of 146 | | | | | | |
| 1/21/2023 3:45 PM | | | | | | | | | | | | | | | | | |
|  | | | **Classification** |  | **Aggregate** |  | **Coverage** |  | **Number Of Coding References** |  | | **Reference Number** |  | **Coded By Initials** |  | **Modified On** |  |
|  | | | | | | | | | | | | | | | | | |
|  | | | | | | | | | | | | 9 |  | CP |  | 12/6/2022 12:43 AM |  |
|  | | | Du corps de Assana Adama, il ne reste que quelques parties décapités au bord d’une route de la ville de Muyuka, près d’un caniveau.  C’est là que la dépouille démembrée du jeune officier de la gendarmerie en service dans la même localité, accusé d’avoir tué un s*e*xagénaire le 3 avril dernier alors qu’il se trouvait seul chez lui et dont il accusait d’être en connivence avec les groupes armés sécessionnistes.  La macabre découverte a été faite aux premières heures de mercredi (24/04/2019 , Ndlr) et aucun groupe n’a pour l’instant revendiqué cet assassinat.  Selon des sources, l’officier gendarme Assana Adam, originaire de la région de l’extrême nord, se trouvait à bord d’un car de transport en commun en direction de Kumba. Il a été enlevé autour de 22 heures 30 minutes par des populations, puis torturé, décapité et démembré au petit matin de mercredi à hauteur de Kwe Kwe – Muyuka..  Des morceaux de son corps ont été éparpillés sur la route principale, ce qui a provoqué la panique parmi les habitants qui sont restés cloîtrés chez eux, craignant une répression.  Des sources affirment que des soldats sont descendus sur les lieux dans la journée d’hier pour nettoyer la route et emporter les restes du corps de ce gendarme  Il faut souligner que dans les régions anglophones du Cameroun, les affrontements entre les forces de l’ordre et les groupes armés sont devenus quasi quotidiens  Plus de 200 membres des forces de défense et de sécurité camerounaises ont perdu la vie dans ce conflit ainsi que plus de 500 civils, selon le groupe d’analyse International Crisis Group.  Ce conflit, qui n’a cessé de prendre de l’ampleur, a déjà forcé plus de 437.000 personnes à fuir leur domicile dans ces régions, selon l’ONU. | | | | | | | | | | | | | |  |
|  | | |  |
|  | | |  |
|  | | |  | | | | | | | | | | | | | |  |
|  | | | | | | | | | | | | 10 |  | CP |  | 12/6/2022 12:47 AM |  |
|  | | | Une enseignante, proviseur du lycée bilingue de Ngomghan, banlieue de Bamenda, la capitale de la région du Nord-Ouest en conflit, et un employé de l’établissement ont été enlevés.  Madame Nkengla Felicitas Mengwi, proviseur dudit lycée a été kidnappée vers 11 h 30 le mercredi 17 avril 2019 sur le campus et transférée vers une destination inconnue.  Les hommes armés sont arrivés à l’école à vélo, ont tiré deux coups en l’air avant d’enlever le proviseur et un vigile. Ils ont tous été conduits vers une destination inconnue sur des motos.  Pour l’heure, aucune information n’a été donnée sur l’identité des assaillants. Par contre, les familles et les amis des personnes kidnappées sont inquiets par la situation  « Nous notons que ces actes ont pour but d’intimider, de créer la peur et la panique parmi le personnel et les élèves, et de perturber le bon fonctionnement de l’année scolaire », indique un enseignant de la dite institution qui a requis l’anonymat  Dans les deux régions anglophones du Nord-Ouest et du Sud-Ouest du Cameroun, une crise socio-politique sans précédent s’est installée fin 2016. Elle s’est transformée fin 2017 en conflit armé.  Des affrontements entre armée et séparatistes, regroupés en groupes épars dans la forêt, s’y produisent quasiment tous les jours depuis plusieurs mois.  Les séparatistes ont décrété un boycott des établissements scolaires, estimant que le système scolaire francophone marginalise les étudiants anglophones.  Les attaques de séparatistes armés contre des écoles sont nombreuses depuis le début du conflit.  Selon des sources concordantes, aux séparatistes armés se sont ajoutés des bandes armées qui rackettent les populations et les entreprises. | | | | | | | | | | | | | |  |
|  | | |  |
|  | | |  |
|  | | |  | | | | | | | | | | | | | |  |
|  | | | | | | | | | | | | 11 |  | CP |  | 12/6/2022 12:53 AM |  |
|  | | | Six élèves – cinq garçons et une fille – d’une école secondaire publique ont été kidnappés à Fongo Tongo, dans le département de la Menoua, région de l’ouest du Cameroun, a annoncé vendredi un responsable de l’administration.  «Les enfants ont été kidnappés, alors qu’ils aidaient leurs parents en agriculture. Nous n’avons aucune idée du lieu où ils se trouvent depuis leur enlèvement. Les ravisseurs ont d’abord demandé une rançon, mais n’ont plus contacté la famille lorsqu’ils se sont rendus compte qu’ils ne pourraient pas payer », a déclaré à la presse Amiya Balise Ndongana, administrateur, accusant les séparatistes armés d’être responsables de l’enlèvement.    Fongo Tongo est située à la frontière avec la région du Nord-ouest, où les séparatistes et forces gouvernementales s’affrontent.  C’est la première fois que des étudiants sont kidnappés dans une région frontalière francophone, depuis que les séparatistes ont pris les armes en novembre 2017.  «Ils ont attaqué cette partie du pays par le passé, alors nous savons qu’ils ont enlevé les enfants. Les forces de défense et de sécurité ont lancé une enquête approfondie sur les enfants et nous espérons qu’ils seront sauvés en toute sécurité », a-t-il déclaré.  Les séparatistes n’ont pas revendiqué l’enlèvement. Depuis la fin de l’année dernière, des étudiants ont été constamment enlevés puis relâchés dans la partie anglophone du Cameroun, par des séparatistes radicaux. | | | | | | | | | | | | | |  |
|  | | |  |
|  | | |  |
|  | | |  | | | | | | | | | | | | | |  |
|  | | | | | | | | | | | | | | | | | |
| Reports\\Coding Summary By Source Report | | | | | | | | | | | Page 29 of 146 | | | | | | |
| 1/21/2023 3:45 PM | | | | | | | | | | | | | | | | | |
|  | | | **Classification** |  | **Aggregate** |  | **Coverage** |  | **Number Of Coding References** |  | | **Reference Number** |  | **Coded By Initials** |  | **Modified On** |  |
|  | | | | | | | | | | | | | | | | | |
|  | | | | | | | | | | | | 12 |  | CP |  | 12/6/2022 1:01 AM |  |
|  | | | Pinterest Reddit  Le drame est survenu au carrefour du quartier Mbessi (arrondissement de Bamenda 3e) dans la matinée du 19 janvier 2019.  Des hommes ont armés ont pris d’assaut un véhicule de ramassage des ordures de l’entreprise Hygiène et salubrité du Cameroun (Hysacam).  Ils y ont mis du feu avant de s’enfuir à bord d’une moto. Le chauffeur et les agents d’entretien à bord ont juste le temps de se sauver. Dans le rayon jouxtant l’horrible scène, une grosse panique s’est emparée des populations.  Les commerçants du marché de Nkwen, situé à environ 700m, a dû fermer. Pareil à la gare routière non loin de là et même au carrefour de Mile 4. Mises au parfum, les forces de l’ordre sont descendues sur les lieux. Des indices en leur possession font croire que les auteurs de l’ignoble acte sont des séparatistes. | | | | | | | | | | | | | |  |
|  | | |  |
|  | | |  | | | | | | | | | | | | | |  |
|  | | | | | | | | | | | | 13 |  | CP |  | 12/6/2022 1:49 AM |  |
|  | | | A Bafou Nord (Nkong-Ni), la Menoua est frontalière avec l’arrondissement de Wabane; du côté de Fongo-Tongo (Fongo-Tongo) avec l’arrondissement d’Alou. Du côté de Fondonnera (Santchou) et Fongo-Ndeng (Dschang), nous sommes frontaliers avec l’arrondissement de Fontem dans le Lebialem», situe Balungueli Confiance Ebune, dans les colonnes de La Nouvelle Expression du vendredi 14 septembre 2018.  La dernière attaque remonte au mardi 11 septembre dernier. Après avoir mis le feu à l’école publique de Ndah à Fongo-Ndeng, les sécessionnistes ont sommé les populations de partir avant qu’ils ne passent à la vitesse supérieure la prochaine fois. A Tchouadeng, un autre village situé non loin de Fongo-Ndeng, les sécessionnistes ont également proféré ces menaces. De même qu’aux populations de Fossong-Ellelen et celles de Nzieh dans l’arrondissement de Nkong-Ni.  Outre la Menoua, indique La Nouvelle Expression, le département des Bamboutos, frontalier avec le Sud-Ouest et le Nord-Ouest est victime de quelques assauts des sécessionnistes. L’on se souvient de l’attaque le 26 juin dernier de la brigade de gendarmerie de Babadjou par un groupe d’hommes armés présentés comme des «Amba boy’s».  Dans l’arrondissement de Galim et plus précisément les groupements Bagam et Bamenyam limitrophes avec le département du Ngokentudja, quelques atrocités ont aussi été attribués aux séparatistes. Dans l’arrondissement de Mbouda, Balatchi frontalier à l’arrondissement de Wabane dans le Sudouest n’a certes pas encore reçu d’attaque, mais les populations sont sur le qui-vive. Exactement comme celles Bangang proche du Lebialem.  Pour se mettre à l’abri, la plupart des habitants des localités, ont décidé de se déplacer. | | | | | | | | | | | | | |  |
|  | | |  |
|  | | |  |
|  | | |  | | | | | | | | | | | | | |  |
|  | | | | | | | | | | | | 14 |  | CP |  | 12/6/2022 1:52 AM |  |
|  | | | De violents accrochages entre l’armée et des combattants séparatistes ont été enregistrés ce mardi 11 septembre dans diverses localités du sud-ouest et du nord-ouest du Cameroun.  A l’instar de Buea où des hommes armés ont pris le contrôle pendant des heures de l’une des principales voies d’accès à la ville avant d’être repoussés par l’armée. Les affrontements avec les forces de l’ordre et de sécurité ont fait plusieurs morts.  Aux premières heures de la matinée, des hommes armés ont bloqué l’accès à la ville de Buea. Ils ont érigé des barricades sur plusieurs dizaines de mètres à l’aide des étals de marché et des pneus de voiture sur lesquels ils ont allumé des gigantesques brasiers.  Plusieurs témoins ont rapporté que les assaillants ont tiré en l’air et forcé les habitants à s’enfermer chez eux. L’intervention des forces de l’ordre et de sécurité les a contraints à battre en retraite après une vive opposition, faisant un mort côté policier et au moins quatre morts du côté des assaillants.  Dans le même temps, dans le Nord-Ouest, près de la ville de Bali, les militaires ont mené des raids sur des positions tenues par les combattants se réclamant de la République autoproclamée d’« Ambazonie ».  Selon une source policière, quinze de ces combattants ont été abattus. Les militaires ont par ailleurs récupéré une dizaine de fusils de fabrication artisanale, un important stock de munitions et quinze téléphones portables. | | | | | | | | | | | | | |  |
|  | | |  |
|  | | |  | | | | | | | | | | | | | |  |
|  | | | | | | | | | | | | 15 |  | CP |  | 12/6/2022 2:00 AM |  |
|  | | | Un policier a été décapité mercredi dans une localité de la région camerounaise du Nord-Ouest anglophone, où les meurtres de membres des forces camerounaises sont régulièrement imputés aux combattants séparatistes, a-t-on appris de sources concordantes.  Un policier en poste à Wum (Nord-Ouest) « a été tué« , a déclaré à l’AFP une source sécuritaire, confirmant une information d’un proche de la victime.  Le policier se trouvait à barrage routier, en compagnie d’un collègue, lorsque des hommes soupçonnés d’être des sécessionnistes l’ont attaqué, selon la source sécuritaire.  « Ils ont coupé sa tête et l’ont emportée« , a-t-elle précisé.  La sécurité dans les régions du Nord-Ouest et du Sud-Ouest anglophones s’est considérablement dégradée. Les combats y sont devenus quotidiens entre les forces de sécurité et des séparatistes armés réclamant la création d’un Etat anglophone indépendant.  Plus de 80 policiers et militaires y ont été tués depuis le début de la crise, fin 2016.  Ce conflit armé de plus en plus violent, ainsi que celui contre le groupe jihadiste Boko Haram dans le nord du pays, pourraient perturber le scrutin présidentiel prévu le 7 octobre, selon les analystes.  Le président Paul Biya, 85 ans dont 35 au pouvoir, s’est déclaré candidat la semaine dernière à un septième mandat consécutif.  Ses partisans estiment qu’il est le mieux à même de répondre à la crise anglophone, ses opposants l’accusant d’en être responsable. | | | | | | | | | | | | | |  |
|  | | |  |
|  | | |  |
|  | | |  | | | | | | | | | | | | | |  |
| Reports\\Coding Summary By Source Report | | | | | | | | | | | Page 30 of 146 | | | | | | |
| 1/21/2023 3:45 PM | | | | | | | | | | | | | | | | | |
|  | | | **Classification** |  | **Aggregate** |  | **Coverage** |  | **Number Of Coding References** |  | | **Reference Number** |  | **Coded By Initials** |  | **Modified On** |  |
|  | | | | | | | | | | | | | | | | | |
|  | | | | | | | | | | | | 16 |  | CP |  | 12/6/2022 2:01 AM |  |
|  | | | Des hommes non identifiés ont semé le trouble samedi dans cette ville la région du Sud-ouest, hors d’atteinte depuis le début de la crise.  La riposte des forces de l’ordre a permis de neutraliser deux des assaillants.  Le calme est revenu dimanche matin 15 juillet 2018 à Limbé. Les populations ont repeuplé les rues. Les chrétiens se sont rendus aux offices religieux. La quiétude apparente qui se lit sur les visages avait disparu 24 heures plus tôt, lorsque la ville a été prise d’assaut par des hommes armés, non identifiés.  Selon les témoignages, c’est autour de 16 h samedi 14 juillet 2018, que des individus armés de fusils et se déplaçant à bord d’un véhicule ont barré la voie à un camion de la Société anonyme des Brasseries du Cameroun (Sabc), transportant des boissons, au lieu-dit Mile 4, à l’entrée de la ville.  Les assaillants ont intimé l’ordre au conducteur de descendre du camion, avant de mettre le feu au véhicule. Ils ont ensuite pris la fuite en se dirigeant vers l’intérieur de la ville. Les forces de l’ordre, alertées, ont aussitôt ouvert le feu. Une source fait savoir que l’entrée de la ville de Limbé a été bloquée pendant l’échange des coups de feu, probablement pour tenter d’intercepter ces individus, au cas où ils empruntaient le même chemin au retour.  L’intervention des forces de l’ordre a permis de neutraliser deux des assaillants, selon certaines | | | | | | | | | | | | | |  |
|  | | |  |
|  | | |  | | | | | | | | | | | | | |  |
|  | | | | | | | | | | | | 17 |  | CP |  | 12/6/2022 11:32 PM |  |
|  | | | C’est en application à un mot d’ordre actuellement en cours de circulation dans les régions du Nord-Ouest et du Sud-Ouest que cet acte a été posé par des assaillants.  Une information émanant de la 5ème région de gendarmerie fait état de ce que le véhicule de service du commissariat spécial de Kumbo, localité de la région du Nord-Ouest, a été incendié par un groupe d’assaillants.  Un acte qui, selon la même source, fait suite à un mot d’ordre en cours de diffusion, en ce moment, dans ces deux régions et appelant à la destruction des équipements et autres biens publics ; particulièrement ceux appartenant aux ressortissants Francophones des huit autres régions du pays.  Diffusé d’ailleurs sur les réseaux sociaux, ce mot d’ordre émanant du groupe «Victoria Shark Battalion » informe, entre autre, l’opinion publique, nationale et internationale, s’entend, qu’à compter de ce 4 juin 2018, le groupe ne tolérera ni ne permettra à aucun individu hors la loi de gaspiller ou d’occuper son espace territorial. Dans la même lancée, le groupe saisit cette opportunité pour inviter tout habitant de Victoria (Limbe) à respecter tous les textes et dispositions réglementaires de la « Federal Republic of Ambazonia ».  Les membres du groupe demandent en outre à tout Francophone résidant à Victoria (Limbe) pour des raisons d’affaires ou professionnelles quelconques d’évacuer son espace territorial dans le délai de temps allant du 1er au 3 juin 2018. « Toute résistance et faillite à ces avertissements fera face, pour compter du 4 juin, à de sérieuses conséquences », déclare le groupe.  Une source bien introduite du côté de la 5ème région militaire interarmées fait d’ailleurs état de l’endommagement de plusieurs véhicules publics dans la | | | | | | | | | | | | | |  |
|  | | |  |
|  | | |  |
|  | | |  | | | | | | | | | | | | | |  |
|  | | | | | | | | | | | | 18 |  | CP |  | 12/6/2022 11:35 PM |  |
|  | | | Les flammes ont endommagé la quasi-totalité de la résidence du ministre chargé des missions à la Présidence de la République à Mbinjong, localité située dans le département de la Manyu.  La résidence appartenant à Victor Mengot Arrey, ministre chargé des missions à la Présidence de la République du Cameroun, a été incendiée à Mbinjong, dans le département de la Manyu (région du Sud-Ouest). Les faits sont survenus dans la nuit de vendredi à samedi.  Le bâtiment incendié, dont les images ont densément circulé sur les réseaux sociaux, a été totalement endommagé. La quasi-totalité de la charpente –toiture y compris- est partie en fumée.  La brigade de gendarmerie de Mamfe est descendue sur le terrain pour mesurer l’ampleur des dégâts occasionnés par les flammes. Une enquête a été ouverte pour déterminer les causes de l’incendie survenu chez Victor Mengot Arrey. | | | | | | | | | | | | | |  |
|  | | |  |
|  | | |  | | | | | | | | | | | | | |  |
|  | | | | | | | | | | | | 19 |  | CP |  | 12/7/2022 12:22 AM |  |
|  | | | La résidence de Ni John Fru Ndi, leader du Front social démocrate (SDF), le principal parti d’opposition camerounais, a pris feu mercredi soir vers 23h00 heure locale à Ntarikong, dans la région anglophone du Nord-Ouest.  Selon des sources bien informées, l’incendie, dont l’origine est toujours inconnue, n’a pas fait beaucoup de dégâts grâce aux efforts des secours. Seule une partie de la cuisine a été consumée par les flammes, qui ont été rapidement maîtrisées.  Bien que l’enquête n’ait pour l’instant révélé aucune cause précise à cet incendie, certains membres de l’entourage du président du parti soupçonnent d’ores et déjà les sécessionnistes anglophones d’être derrière l’incident.  « Les sécessionnistes ont publiquement proféré des menaces à l’encontre du président du parti, qui ne partage pas leurs revendications séparatistes », a confié à Xinhua un membre de l’entourage de M. Fru Ndi, sous couvert d’anonymat.  Le 21 février dernier, le SDF s’était vu obligé de déplacer son congrès depuis la Presbyrerian Church vers le Palais des congrès de Bamenda, suite à des menaces de violences proférées par les séparatistes anglophones | | | | | | | | | | | | | |  |
|  | | |  |
|  | | |  | | | | | | | | | | | | | |  |
|  | | | | | | | | | | | | | | | | | |
| Reports\\Coding Summary By Source Report | | | | | | | | | | | Page 31 of 146 | | | | | | |
| 1/21/2023 3:45 PM | | | | | | | | | | | | | | | | | |
|  | | | **Classification** |  | **Aggregate** |  | **Coverage** |  | **Number Of Coding References** |  | | **Reference Number** |  | **Coded By Initials** |  | **Modified On** |  |
|  | | | | | | | | | | | | | | | | | |
|  | | | | | | | | | | | | 20 |  | CP |  | 12/7/2022 12:55 AM |  |
|  | | | La partie anglophone du Cameroun en conflit avec le pouvoir central de Yaoundé devient-elle peu à peu le nouveau  théâtre des actes terroristes qui se limitaient jusqu’ici aux régions septentrionales du pays attaquées par la secte transnationale Boko Haram ?  On est tenté de le craindre après l’explosion, samedi,  de deux bombes artisanales dans la ville de Bamenda, épicentre de la crise anglophone.  Les deux explosifs, fabriqués localement, ont été déclenchés à quelques minutes d’intervalle, dans un taxi se dirigeant vers le marché de vivres de la ville –pour le premier-, et dans un carrefour populeux -tout près d’un établissement hospitalier- pour le second, mais n’ont pas fait de victimes. Trois autres ont été découverts et désamorcés par des éléments du Bataillon d’Intervention Rapide (BIR), soit un au carrefour sus-évoqué, et deux autres au Palais des Congrès de Bamenda, qui devait abriter une messe le lendemain dimanche.  Il est à noter que les auteurs de ces actes n’ont pas été appréhendés. Du moins jusqu’au moment où nous mettions en ligne.  Depuis, l’inquiétude va grandissante, d’autant plus qu’une semaine auparavant des sécessionnistes anglophones faisant partie d’un groupe prétendument armé, avaient fait circuler  des tracts demandant formellement aux députés et sénateurs ressortissants des deux régions anglophones du pays de quitter Yaoundé au plus tard le 23 septembre, en prévision d’un mouvement qu’ils allaient déclencher à partir de cette date-là. Ce à quoi il faut ajouter l’arrestation il y a un mois d’une demi-dizaine  de personnes détentrices « d’armes de guerre et  de matériels de fabrication d’explosifs ». Les forces de sécurité et de défense  qui avaient évoqué des tentatives d’attentats terroristes au Cameroun avaient fait savoir que les hors-la-loi interpellés avaient avoué mener ces activités en vue de libérer la région anglophone.  Au Cameroun, après l’explosion des bombes artisanales à et la découverte d’autres, on se pose aujourd’hui la question de savoir si les séparatistes sont déjà en train de passer à l’acte, ou s’ils sont en train de tester la capacité des forces gouvernementales à prévenir, déjouer et réprimer des actes de guerre qui vont au-delà des simples manifestations de protestation. | | | | | | | | | | | | | |  |
|  | | |  |
|  | | |  |
|  | | |  | | | | | | | | | | | | | |  |
|  | **Internals\\Bamenda Online articles** | | | | | | | | | | | | | | | |  |
|  | | **Node** | | | | | | | | | | | | | | |  |
|  | | | **Nodes\\Conflict** | | | | | | | | | | | | | |  |
|  |  | No |  | 0.0154 |  | 11 |  | | | | | | |
|  | | |  |  |  |  |  |  |  |  | | | | | | | |
|  | | | | | | | | | | | | 1 |  | CP |  | 12/7/2022 11:34 PM |  |
|  | | | The MP for Bamenda-Bali, Hon. Fobi Nchinda, one of the few to brief the press about what was discussed behind closed doors said he made it clear to the minister that “ there is a problem in the Northwest and that children have not been going to school” He also said he specifically  told the Governor and the minister that they should make sure that the Head of State get the message that there is a serious crisis in the region and that the president should call a conference to discuss the form of the state and by extension the Anglophone educational system and the exams. | | | | | | | | | | | | | |  |
|  | | |  | | | | | | | | | | | | | |  |
|  | | | | | | | | | | | | 2 |  | CP |  | 12/7/2022 11:40 PM |  |
|  | | | Cameroon is being sued for blocking the internet in its Anglophone regions  Two international digital rights advocacy groups have joined the growing clamor to stop Cameroon’s government disrupting internet services in its Anglophone regions.  Access Now and Internet Sans Frontières (ISF) have intervened on behalf a consortium of local and regional civil society organizations who previously sued the government for blocking access to the internet in the South West and North West English-speaking regions. In court documents filed to the constitutional council and seen by Quartz, the organizations say the current shutdown violates the rights to freedom of expression, access to information, non-discrimination based on language, and hinders economic, social, and cultural rights.  The filings, the first of its kind against a government by the organizations, seek to show the internet cut-off was violating regional and international frameworks that support the right to seek, receive and impart information and ideas through digital means. The petitioners also hope to show that the blanket ban was not proportionate and that the government failed to present a legitimate aim for the blackout. | | | | | | | | | | | | | |  |
|  | | |  |
|  | | |  | | | | | | | | | | | | | |  |
|  | | | | | | | | | | | | 3 |  | CP |  | 12/8/2022 12:36 AM |  |
|  | | | President Paul Biya in a rare televised outing on September  10, 2019 announced the convening of a major National dialogue without exclusion  as part of the solution to the crisis rocking the Northwest and Southwest  regions of the country. | | | | | | | | | | | | | |  |
|  | | |  | | | | | | | | | | | | | |  |
| Reports\\Coding Summary By Source Report | | | | | | | | | | | Page 32 of 146 | | | | | | |
| 1/21/2023 3:45 PM | | | | | | | | | | | | | | | | | |
|  | | | **Classification** |  | **Aggregate** |  | **Coverage** |  | **Number Of Coding References** |  | | **Reference Number** |  | **Coded By Initials** |  | **Modified On** |  |
|  | | | | | | | | | | | | | | | | | |
|  | | | | | | | | | | | | 4 |  | CP |  | 12/8/2022 12:46 AM |  |
|  | | | The government of Cameroon and the administration of the Northwest and Southwest regions have seen another desperate attempt to have schools reopen in Anglophone Cameroon perturbed by the annoying ghost towns that have rendered them helpless in the front of a national crisis.  Northwest Governor, Adolph Lele Lafrique was on the brink of becoming a hero for the regime, for having succeeded where the Prime Minister, the ministers of Higher Education, Secondary and Basic, and the Paul Ghogomou’s Commission had failed by having the Anglophone Teachers’ signed a communiqué calling off the strike action they initiated since November 21, 2016.  He had succeeded to have the Baptist Teachers Trade Union, the Presbyterian Education Authority Teachers’ Union, The Teachers’ Association of Cameroon and Cameroon Teachers’ Trade Union signed a document calling off the strike which was proudly presented over CRTV as a panacea to the Anglophone crisis, and the full resumption of classes for the second term.  Southwest governor Okalia Bilia even went further calling on all to put hands on decks for a successful celebration of the upcoming Youth Day as a show of national unity. But to their utter dismay, the ghost came visiting on Monday February 6 once more. His counterpart of the Northwest drove down to Nkambe to ensure a smooth resumption but was greeted by a ghost town. | | | | | | | | | | | | | |  |
|  | | |  |
|  | | |  | | | | | | | | | | | | | |  |
|  | | | | | | | | | | | | 5 |  | CP |  | 12/8/2022 1:39 AM |  |
|  | | | The national Executive Council  (NEC) of the Social Democratic Front – SDF has decided to put to the forefront,  its “federalism Agenda” in the face of the rising Anglophone crisis. This was one of the major outcomes of the NEC meeting on Saturday September 16, 2017, as the party prepares for the 9th national elective convention in October.  Nkemlemo Denis, National Communication vice Chair in his press briefing after the NEC conclave accused those advocating for separation of being sponsored, some by the CPDM. He said the party will accelerate the pressure on the regime to adopt a federal system of government. He said the SDF is the only party that holds the peace of Cameroon.  He blamed the government and the separatists of being extremist in the crisis | | | | | | | | | | | | | |  |
|  | | |  |
|  | | |  | | | | | | | | | | | | | |  |
|  | | | | | | | | | | | | 6 |  | CP |  | 12/8/2022 1:43 AM |  |
|  | | | Some opposition Members of Parliament of the opposition Social Democratic Front -SDF have disrupted proceeding in the National Assembly, demanding the Anglophone crisis be tabled for discussion.  The MPs took to the rostrum chanting songs commonly used by Anglophones in confrontation with security forces during the crisis, forcing the speaker and other ruling CPDM MPs to abandon the session to the handful of SDF MPs. | | | | | | | | | | | | | |  |
|  | | |  | | | | | | | | | | | | | |  |
|  | | | | | | | | | | | | 7 |  | CP |  | 12/8/2022 1:44 AM |  |
|  | | | The Social Democratic Front SDF has live true to its threats to force the Anglophone Crisis onto the agenda of the national Assembly by hook or by crook. SDF deputies once again broke into parliament today, asking their peers of the presidential majority to table the crisis for discussion which they consider paramount to any other item on the agenda  Hon. Joseph Banadzem, SDF parliamentary group leader took to the rostrum, snatched the microphone from the Prime Minister who was about to present the 2018 draft budget.  Immediately some members of government like Gregoire  Owona and the PM’s security came to his defense blocking SDF MPs who were determined to interrupt his presentation.  The PM continued his presentation albeit drowned in the chanting by SDF MPS | | | | | | | | | | | | | |  |
|  | | |  |
|  | | |  | | | | | | | | | | | | | |  |
|  | | | | | | | | | | | | 8 |  | CP |  | 12/12/2022 12:56 AM |  |
|  | | | The Early Day Motion 1189 is sponsored by Hywel Williams of Plaid Cymru party and supported by MPS from across the British political divide including MPs from the Labour and Conservative parties and the Scottish National Party. The Early Day Motion 1189 titled the “Anglophone Crisis in Cameroon” was tabled on the 24 of April 2018.  The motion reads “That this House condemns the violence and state oppression imposed by the Government of Cameroon in the Anglophone regions of the country; highlights with regret that over 20,000 refugees from Cameroon have been registered by the UNHCR in their camps across the border in Nigeria; acknowledges reports that an estimated 1,000 people have been detained and 100 people shot for opposing the Government’s oppression of the English-speaking community; notes that the Government of Cameroon responded to peaceful protests in 2017 by closing borders to the anglophone regions and deploying the Army’s Rapid Intervention Brigade; further condemns the Government of Cameroon for its decision to use force and appeals for a peaceful solution to be found; and calls on the UK Government to press the Government in Cameroon to open talks with anglophone leaders”  The last of the 15 MPs to sign the motion is Douglas Chapman from the | | | | | | | | | | | | | |  |
|  | | |  |
|  | | |  | | | | | | | | | | | | | |  |
|  | | | | | | | | | | | | 9 |  | CP |  | 12/12/2022 12:55 AM |  |
|  | | | Cameroon’s ministry of Post and Telecommunication (MINPOSTEL) has described as “fake news” a social media allegation that the government will shut down the internet from the 7-9 of October, 2018. Dates which coincides with the holding of the 2018 Presidential elections and its immediate aftermath. | | | | | | | | | | | | | |  |
|  | | |  | | | | | | | | | | | | | |  |
|  | | | | | | | | | | | | 10 |  | CP |  | 12/8/2022 2:04 AM |  |
|  | | | suspected Ambazonia separatist commander operating in Kumbo, Shey Wirngo has been arrested.  Reports from Bui division say Shey Wirngo and his group were intercepted by elements of the gendarmerie on March 30, 2019 in the outskirt Kumbo, about a 100 km North East of Bamenda, the regional capital. He was arrested alongside some of his fighters following an intense gun exchange with security forces that lead to the death of at least two secessionist fighters.  Shey Wirngo became | | | | | | | | | | | | | |  |
|  | | |  | | | | | | | | | | | | | |  |
| Reports\\Coding Summary By Source Report | | | | | | | | | | | Page 33 of 146 | | | | | | |
| 1/21/2023 3:45 PM | | | | | | | | | | | | | | | | | |
|  | | | **Classification** |  | **Aggregate** |  | **Coverage** |  | **Number Of Coding References** |  | | **Reference Number** |  | **Coded By Initials** |  | **Modified On** |  |
|  | | | | | | | | | | | | | | | | | |
|  | | | | | | | | | | | | 11 |  | CP |  | 12/12/2022 12:41 AM |  |
|  | | | The Arch Bishop of the Bamenda Arch Diocese, His Grace Cornelius Fontem Esua, the Auxiliary Bishop of Bamenda  Mgr. Micheal Bibi, the Bishop of Kumbo, Mgr.George Nkuo the Principals of Our Lady of Lourdes and Sacred Heart Mankon, and the principal of Saint Bedes College Ashing Kom were due to appear before the Court of First Instance Bamenda on Friday May 21, 2017 to answer charges on seven counts brought against them by a group of parents under the canopy of the Consortium of Parents whose children attend various mission institutions.  The Bishops and Principals | | | | | | | | | | | | | |  |
|  | | |  | | | | | | | | | | | | | |  |
|  | | | **Nodes\\Economic Consequence** | | | | | | | | | | | | | |  |
|  |  | No |  | 0.0041 |  | 3 |  | | | | | | |
|  | | |  |  |  |  |  |  |  |  | | | | | | | |
|  | | | | | | | | | | | | 1 |  | CP |  | 12/7/2022 11:52 PM |  |
|  | | | The political crisis in the North West and  South West regions of Cameroon, the economic sector is greatly hit as most  business have been forced to fold up as the local population continues to lose  jobs.  The brewery sector has been greatly hit in the  crisis as activities slow down due to a purported ban by separatist on products  of Les Brassseries du Cameroun because it is a French company.  This is not true. The SABC group has been in  Cameroon for the past 70 years at the service of the nation, largely employing  Cameroonians. The groups alone is the largest employer in the private sector  with at least 200.000 workers with the North West region alone holding about 13  percent of that figure, not to talk of the over 10.000 indirect jobs the  company creates. To force several Cameroonians in these two regions to stop  working is a falsehood which shouldd be wiped out. | | | | | | | | | | | | | |  |
|  | | |  |
|  | | |  |
|  | | |  | | | | | | | | | | | | | |  |
|  | | | | | | | | | | | | 2 |  | CP |  | 12/8/2022 1:27 AM |  |
|  | | | Candidates started sitting in for the written part of the June 2017 session of the GCE Board examination in all 10 regions of the country with special security measures put in place in "unified-accommodation" centres in the Northwest and Southwest regions due to the ongoing Anglophone crisis in the country. | | | | | | | | | | | | | |  |
|  | | |  | | | | | | | | | | | | | |  |
|  | | | | | | | | | | | | 3 |  | CP |  | 12/8/2022 1:29 AM |  |
|  | | | The sale of contraband petrol popularly called “fingue” or “zoazoa” in the Northwest region and Bamenda in particular has been strongly condemned by the Northwest Administration who blame it for adversely affecting the economy and the health of the sellers.  The Inspector General of the Region, Ivo Charles Makoge raised the worries during a sensitization meeting at the Governor’s office Wednesday June 14, 2017. He called on road side sellers to desist from the act as it adversely affects their health and the economy or the region.  The regional delegate of water and Energy for the NW, Antoine Bossong said there has been a drastic drop of sales at filling stations in Bamenda. He also added the illegal fuel damages vehicle engines and may cause cancer to those selling it. SONARA, the national refinery company he concluded is the sole body authorized to supply petrol and other related petroleum products in the country. | | | | | | | | | | | | | |  |
|  | | |  |
|  | | |  | | | | | | | | | | | | | |  |
|  | | | **Nodes\\Effects** | | | | | | | | | | | | | |  |
|  |  | No |  | 0.0088 |  | 7 |  | | | | | | |
|  | | |  |  |  |  |  |  |  |  | | | | | | | |
|  | | | | | | | | | | | | 1 |  | CP |  | 12/8/2022 1:28 AM |  |
|  | | | The Governor made a stop over at the GBTTC Bamenda on his way to Fundong. The visit is to asses the level of participation of pupils and the security of the candidates. Several pupils are not sitting for the examination due to the ongoing teachers' strike that began last November 21, 2016 and that has spiral over into a general socio-political crisis known today as the Anglophone Crisis. | | | | | | | | | | | | | |  |
|  | | |  | | | | | | | | | | | | | |  |
|  | | | | | | | | | | | | | | | | | |
| Reports\\Coding Summary By Source Report | | | | | | | | | | | Page 34 of 146 | | | | | | |
| 1/21/2023 3:45 PM | | | | | | | | | | | | | | | | | |
|  | | | **Classification** |  | **Aggregate** |  | **Coverage** |  | **Number Of Coding References** |  | | **Reference Number** |  | **Coded By Initials** |  | **Modified On** |  |
|  | | | | | | | | | | | | | | | | | |
|  | | | | | | | | | | | | 2 |  | CP |  | 12/8/2022 1:31 AM |  |
|  | | | Government officials in Bamenda are busy scratching their heads and revising their ENAM notes as another ghost town brings to nullity another highly publicized and anticipated government school reopening in the region in the midst of the ongoing Anglophone crisis. Despite the presence of the minister of Basic Education in town, another strong statement of defiant has been sent to Yaoundé.  A quick drive downtown Bamenda and a visit to some of the schools this morning tells a different story. It’s a complete shut down in the business district, banks, offices, and markets closed. Intriguing is the Bamenda City Council controlled markets, Ntarikon, Main Market and Food market gates are wide open but there is not a single soul in the lockups to sell or to buy despite threats from the government delegate to close indefinitely any shed that respects the ghost town.  Our reporters spotted a few children at the GBHS Bamenda, all in assorted dresses and some in their uniforms in cars, heading into town.  The minister of Basic Education is due to hold a launching at the Bamenda Grand Stand later this morning, while the SG of the ministry of Secondary Education would hold a similar event at 10 am on the campus of GBHS Down Town-Bamenda. | | | | | | | | | | | | | |  |
|  | | |  |
|  | | |  | | | | | | | | | | | | | |  |
|  | | | | | | | | | | | | 3 |  | CP |  | 12/8/2022 1:35 AM |  |
|  | | | The call for three days of ghost town forced on the populations of the Northwest and Southwest regions have witnessed a downward trend in week two.  The ghost town usually leaves the streets of Bamenda quiet with total blackout to business activities, a general silence around markets and its surrounding areas, handful of commercial motor bikes and a couple of taxis if any, plying the roads  The situation witnessed a change this week with more economic activities witnessed particularly around markets. More Yellow caps were visible on the streets particularly on the third day. The thia slow pick up of commercial activities some inhabitants say is due to the increase in frequency of ghost town days from one to three in a single week. | | | | | | | | | | | | | |  |
|  | | |  |
|  | | |  | | | | | | | | | | | | | |  |
|  | | | | | | | | | | | | 4 |  | CP |  | 12/8/2022 1:45 AM |  |
|  | | | The order goes further to warn business men and persons ploughing the Manyu river to “suspend all activities still further notice” and for all motor bike riders “to strictly observe without provocation the suspension of their circulation from 7pm to 6am daily | | | | | | | | | | | | | |  |
|  | | |  | | | | | | | | | | | | | |  |
|  | | | | | | | | | | | | 5 |  | CP |  | 12/8/2022 1:47 AM |  |
|  | | | A night curfew from 8 pm to 6 am has been declared over the entre Northwest Region from today, February 10th to Saturday February 17, 2018 renewable. The curfew declared by Northwest Governor Lele Lafrique Cheffo Deben Adolphe follows to days of heighten tension in Bamenda after the killing of a soldier by unidentified individuals on Thursday February 8, at the commercial Avenue and the fatal shooting of a commercial bike rider and his passenger by a gendarmerie patrol team n the wee hours of the same day.  The order restricts all forms of movement of goods and persons across the entire region as from 8 pm to 6 am for a period of one week renewable.  It prohibits the movements of vehicles and persons and calls on transport agencies to leave town before 8 pm and all arrival possible only after 6 am. | | | | | | | | | | | | | |  |
|  | | |  |
|  | | |  | | | | | | | | | | | | | |  |
|  | | | | | | | | | | | | 6 |  | CP |  | 12/12/2022 12:38 AM |  |
|  | | | Both men were accompanied by Hon. Enwe Francis of Momo West at a press gathering this afternoon at the Ayaba Hotel Bamenda to ask the media in the region to continue to sensitize the population to shun fear and send their children back to school. The call comes after schools failed to effectively kick off in the Northwest region due to the ongoing Anglophone crisis.  Senator Simon Achidi Achu of Mezam and his colleague Dingha Banyi Ignatius of Ngoketunja condemned in strong terms the ghost town that has completely paralysed economic activities in the region and the rampant burning of schools and government structures. They blamed the crisis | | | | | | | | | | | | | |  |
|  | | |  | | | | | | | | | | | | | |  |
|  | | | | | | | | | | | | 7 |  | CP |  | 12/9/2022 2:23 AM |  |
|  | | | The mention of school resumption to parents in the Northwest and Southwest regions of Cameroon during the wee days of the 2017/2018 academic year was a taboo, an absurdity of the times and an indication that your do not belong. Many joint the strike for the restoration of a professional education system where their children could be assured of a brighter future, the high rate of unemployment amongst Anglophones combated and the educational system improved upon. | | | | | | | | | | | | | |  |
|  | | |  | | | | | | | | | | | | | |  |
|  | | | **Nodes\\Financial Support** | | | | | | | | | | | | | |  |
|  |  | No |  | 0.0010 |  | 1 |  | | | | | | |
|  | | |  |  |  |  |  |  |  |  | | | | | | | |
|  | | | | | | | | | | | | 1 |  | CP |  | 12/8/2022 1:23 AM |  |
|  | | | Handing over the financial package to the victims today, May 5, 2017, at a brief ceremony held at the Bamenda Congress Hall, North West Governor, Adolph Lele L’Afrique challenged them to put the money into effective use so that they can start their businesses anew.   A total of 73,700,000 FRS was distributed to the victims. The six affected lockup stores shared a total 20 million FRS, 475,000 FRS each to the 91 temporal sheds and 100,000 FRS each for the 12 trading tables that were razed to the ground in the fire incident. | | | | | | | | | | | | | |  |
|  | | |  | | | | | | | | | | | | | |  |
| Reports\\Coding Summary By Source Report | | | | | | | | | | | Page 35 of 146 | | | | | | |
| 1/21/2023 3:45 PM | | | | | | | | | | | | | | | | | |
|  | | | **Classification** |  | **Aggregate** |  | **Coverage** |  | **Number Of Coding References** |  | | **Reference Number** |  | **Coded By Initials** |  | **Modified On** |  |
|  | | | **Nodes\\Hostage** | | | | | | | | | | | | | |  |
|  |  | No |  | 0.0013 |  | 2 |  | | | | | | |
|  | | |  |  |  |  |  |  |  |  | | | | | | | |
|  | | | | | | | | | | | | 1 |  | CP |  | 12/7/2022 11:37 PM |  |
|  | | | Southern Cameroon's separatist leader, Sisiku Julius Ayuk Tabe, has been abducted in Nigeria.  A statement signed by Secretary of Communications and IT, Federal Republic of Ambazonia, Chris Anu, said Tabe was abducted by "gunmen from la Republic du Cameroun at about 19:30 pm in Nera Hotels, (Ekwueme Road), Abuja Nigeria on January 5, 2018." | | | | | | | | | | | | | |  |
|  | | |  | | | | | | | | | | | | | |  |
|  | | | | | | | | | | | | 2 |  | CP |  | 12/7/2022 11:50 PM |  |
|  | | | On February 16, 170 students, mostly girls under 18, were abducted by a group of armed separatists from a boarding school in Kumbo, in the North-West region of Cameroon. The separatists, who stormed the building in the early hours, also abducted a teacher and two guards. Everyone was released the following day amid rumours of ransoms being paid. The school remains closed. | | | | | | | | | | | | | |  |
|  | | |  | | | | | | | | | | | | | |  |
|  | | | **Nodes\\Human Interest** | | | | | | | | | | | | | |  |
|  |  | No |  | 0.0044 |  | 4 |  | | | | | | |
|  | | |  |  |  |  |  |  |  |  | | | | | | | |
|  | | | | | | | | | | | | 1 |  | CP |  | 12/8/2022 1:23 AM |  |
|  | | | The President of the Republic, H.E Paul Biya has compensated the victims of the March 14th fire incident at the Bamenda food market where a total of six lockup stores, 91 open stores (temporal stores) and 12 trading benches were ravaged by fire in a suspected arson. | | | | | | | | | | | | | |  |
|  | | |  | | | | | | | | | | | | | |  |
|  | | | | | | | | | | | | 2 |  | CP |  | 12/9/2022 12:00 AM |  |
|  | | | This new revelation  seems to indicate that the state has no case against them and is applying a dilatory tactics to drag the case for as long as possible, hoping to find a solution somewhere in between.  Mancho Bibixy, in this online video promises to spit venom whenever the courts would decide to question him. Speaking in Pidgin English he said he had known beforehand that he would be arrested because they have tried to do so unsuccessfully eight times before his arrest. | | | | | | | | | | | | | |  |
|  | | |  | | | | | | | | | | | | | |  |
|  | | | | | | | | | | | | 3 |  | CP |  | 12/9/2022 12:23 AM |  |
|  | | | It’s another busy day at the Bamenda  Food market ,  taxis, commercial motorbikes, traders and sellers alike try to navigate their way through a small part of the road left usable by a huge pile of smelly garbage. Most pedestrians are forced to  cover their noises in their hands as they try to find a way pass a huge heap of rotten mesh of cabbage, tomatoes, pears, water melon, orange,  celery, onions, leaks  and other fresh food items that has been left unattended for months by the garbage clearing company-Hysacam.  This is no longer an uncommon sight in Bamenda. Everywhere across the metropolis are abandoned mountains of domestic and at times industrial waste left to suffocate the air of the surrounding area with a pungent irritating smell, posing serious health threats to the population.  Not a single neighbourhood is left out. This has forced some nearby residents who could no | | | | | | | | | | | | | |  |
|  | | |  |
|  | | |  | | | | | | | | | | | | | |  |
|  | | | | | | | | | | | | 4 |  | CP |  | 12/9/2022 2:30 AM |  |
|  | | | The waste disposal management company, HYSACAM, has been grounded for 15 days with no way to carry on with waste disposal in Bamenda.  The main bridge leading to the dump site in Mbelewa- Mile Four Nkwen in Bamenda 3 subdivision was broken by unidentified gun men, trying to restrict the movement of cars into certain parts of Bafut thus rendering the dump site inaccessible to trucks of the company.  Nowadays, dirt is virtually littered around the city of Bamenda especially at road junctions and markets. The stench emanating from such waste materials is unbearable. At the Bamenda Food Market, portions of the road have been covered by stockpiled dirt.  HYSACAM’s | | | | | | | | | | | | | |  |
|  | | |  |
|  | | |  | | | | | | | | | | | | | |  |
|  | | | **Nodes\\Lives Lost** | | | | | | | | | | | | | |  |
|  |  | No |  | 0.0015 |  | 2 |  | | | | | | |
|  | | |  |  |  |  |  |  |  |  | | | | | | | |
|  | | | | | | | | | | | | 1 |  | CP |  | 12/12/2022 1:00 AM |  |
|  | | | Several persons have been killed, properties torch, hundred  arrested and detained, tortured, others kidnapped, intimidated while other have been forced to flee into exile since the Anglophone crisis erupted in October 2016.  There have also been reports of families not seeing their loves ones since October 1st. | | | | | | | | | | | | | |  |
|  | | |  | | | | | | | | | | | | | |  |
| Reports\\Coding Summary By Source Report | | | | | | | | | | | Page 36 of 146 | | | | | | |
| 1/21/2023 3:45 PM | | | | | | | | | | | | | | | | | |
|  | | | **Classification** |  | **Aggregate** |  | **Coverage** |  | **Number Of Coding References** |  | | **Reference Number** |  | **Coded By Initials** |  | **Modified On** |  |
|  | | | | | | | | | | | | | | | | | |
|  | | | | | | | | | | | | 2 |  | CP |  | 12/8/2022 1:43 AM |  |
|  | | | The Killing of two gendarme officers in Bamenda in the wee hours of Wednesday has been claimed by the Ambazonian Defense Forces –ADF according to a report by the Reuters News Agency.  The report states “Cho Ayaba, a leading member of the Ambazonian Governing Council, a separatist body established to create an independent state called Ambazonia, said secessionist militants killed three gendarmes in two coordinated attacks in Bamenda, the capital of the predominantly English-speaking Northwest region” | | | | | | | | | | | | | |  |
|  | | |  | | | | | | | | | | | | | |  |
|  | | | **Nodes\\Peace and Unity** | | | | | | | | | | | | | |  |
|  |  | No |  | 0.0141 |  | 13 |  | | | | | | |
|  | | |  |  |  |  |  |  |  |  | | | | | | | |
|  | | | | | | | | | | | | 1 |  | CP |  | 12/7/2022 11:44 PM |  |
|  | | | We want peace” “we are tired of the war” “our children are dying every day” “Let the war come to an end” “the women cried out loud in pain” were some of the many messages displayed on placards. Others carried the peace plant “Nkeung” as a reminder of the need for peace. | | | | | | | | | | | | | |  |
|  | | |  | | | | | | | | | | | | | |  |
|  | | | | | | | | | | | | 2 |  | CP |  | 12/8/2022 12:39 AM |  |
|  | | | The Mafors she continued “yearn for peace. Drop the guns and stop the violence.  As queen mothers we don’t know discrimination. We are mothers and are bound to protect the lives of our offspring.  Our offspring have been dying in their numbers because of this violence and we come to cry that the killings should stop.” | | | | | | | | | | | | | |  |
|  | | |  | | | | | | | | | | | | | |  |
|  | | | | | | | | | | | | 3 |  | CP |  | 12/8/2022 12:41 AM |  |
|  | | | This could have been a result of the charmed offensive by the Governor of the region who descended down to some popular neighbourhoods in town to commune with the population, sharing a drink and soft words with some residents of Mile II Nkwen, Hospital Round About and Bali Park amongst others. He assured the population that only one person was killed and investigations have been launched to that effect, he called for dialogue, peace and understanding and that government has initiated moves to dialogue with teachers and lawyers. | | | | | | | | | | | | | |  |
|  | | |  | | | | | | | | | | | | | |  |
|  | | | | | | | | | | | | 4 |  | CP |  | 12/8/2022 1:24 AM |  |
|  | | | A total of 11 government ministers have been visiting the Northwest within the last 30 days or so for one reason or the other with each proposing or coming to announce some major government projects, which many have seen as government’s ploy to court the NW population away from the crippling social unrest that has engulfed the two Anglophone regions, partially paralyzing economy activities. | | | | | | | | | | | | | |  |
|  | | |  | | | | | | | | | | | | | |  |
|  | | | | | | | | | | | | 5 |  | CP |  | 12/8/2022 1:32 AM |  |
|  | | | A presidential decree signed on Monday, September 4, 2017 has appointed Divisional officers to some subdivisions in the country, including several in the northwest Region. Five of the seven subdivisions in Mezam are touched by the presidential degree.  In Bamenda II, Tanyi Roquecegnol Akwo comes in, in place of Itoe Peter Mbongo who moves over to Yokadouma in the East Region. He was formerly the D.O of Bazou. Coming in from Ndu is Achu Fru George who takes over from Jude Ewane Mbong as D.O of Bafut Subdivision who moves down to Kumba III in same capacity. | | | | | | | | | | | | | |  |
|  | | |  | | | | | | | | | | | | | |  |
|  | | | | | | | | | | | | 6 |  | CP |  | 12/8/2022 1:41 AM |  |
|  | | | The people of Mankon have been prescribed peace as the ultimate solution to the ongoing Anglophone crisis plaguing Cameroon. This was during a “peace gathering” at the Mankon Fon’s Palace Courtyard, organised by the Pan African Youth Development Network.  Abdou Karim, the main speaker at the gathering used scriptures from the Holy Bible and Quaran to justify that our problems today are because we don’t listen to God.  He classified ‘peace” into self peace, family peace and community peace, saying each inevitable leads to the other, and can be reached when we cultivate inner peace. He described “real peace” as “ not the absence of war but the presence of justice in society | | | | | | | | | | | | | |  |
|  | | |  | | | | | | | | | | | | | |  |
|  | | | | | | | | | | | | 7 |  | CP |  | 12/8/2022 2:13 AM |  |
|  | | | The people of Bifang, a locality in Widikum subdivision have risen above the challenge and take up their collective security into their hands. Recently they apprehended six Ambazonian fighters and their sympathisers and handed them over to the Gendarmarie.  These three claim they were mere cooks for the seperatist fighters  Dagha Taranus Mbun, 2nd deputy Mayor of Widikum says the village traditional council took a stance against any son of the soil who who took up arms to be harassing others and called on them to drop their arms or face the consequences.  “Some of the boys dropped their arms to form a vigilante group to protect the village” he added. All of this as a result of continues education he continued.  The first group of three of arrested say they were coerced into joining the fighters. Speaking in pidgin English they said;  “In Mamfe, I was working in a bakery. They | | | | | | | | | | | | | |  |
|  | | |  |
|  | | |  | | | | | | | | | | | | | |  |
| Reports\\Coding Summary By Source Report | | | | | | | | | | | Page 37 of 146 | | | | | | |
| 1/21/2023 3:45 PM | | | | | | | | | | | | | | | | | |
|  | | | **Classification** |  | **Aggregate** |  | **Coverage** |  | **Number Of Coding References** |  | | **Reference Number** |  | **Coded By Initials** |  | **Modified On** |  |
|  | | | | | | | | | | | | | | | | | |
|  | | | | | | | | | | | | 8 |  | CP |  | 12/8/2022 2:22 AM |  |
|  | | | Anglophone teachers’ trade unions have jointly issued a statement indicting opposing forces in the ongoing anglophone crisis to bury the hatchet and spare the anglophone subsystem of education and the life of students and educators, considered the most affected.  The press release in parts detailed the number of students and educators kidnapped, killed or who died as a consequence of the actions of the belligerents.  “in the 2018/2019 school year, the number of students who were either attacked, kidnapped, tortured and/or shot at was 287… Correspondingly, 28 teachers died in 2018/2019 (08 of them were murdered and the rest from every indication had their deaths provoked by incidents related to the ongoing insurgency) while 36 died in 2019/2020 (03 murdered and 12 dying suddenly…”  The release also mention the names of the last three victims it said were callously murdered. They include messrs Song Paulinus, Pipayu Ibrahim Ritre and Njamshi Nelson Ndi. | | | | | | | | | | | | | |  |
|  | | |  |
|  | | |  | | | | | | | | | | | | | |  |
|  | | | | | | | | | | | | 9 |  | CP |  | 12/12/2022 12:43 AM |  |
|  | | | The population of the Northwest region have been called upon to embrace the reconstruction agenda of The Head of State, President Paul Biya as a way back to peace and normality. Mr.  Paul Tasong, Coordinator of the Presidential Plan for the Reconstruction and Development (PPRD) of the Northwest and Southwest regions was speaking In Bamenda on June 22, 2020 as he addressed administrative, traditional, religious and opinion leaders of the region.   “Reconstruction is a pathway to peace. It will be done gradually from the secured areas to the most affected” Paul Tasong said, adding people “cannot live on assistance for ever”. | | | | | | | | | | | | | |  |
|  | | |  | | | | | | | | | | | | | |  |
|  | | | | | | | | | | | | 10 |  | CP |  | 12/12/2022 12:42 AM |  |
|  | | | In a Press Conference in Bamenda yesterday, the chief Priest of the PCC, the Rt. Rev. Fonki Samuel called for dialogue with the striking teachers and lawyers towards a peaceful resolution of the Anglophone crisis that has plague activities in both the Northwest and the South West regions of Cameroon.  Reading out what appears to be the resolutions of the Executive Committee Meeting of the PCC that held in Buea on January 27, 2017, Rev. Fonki said the PCC “lends it voice to all the efforts of well meaning Cameroonians to bring a fruitful closure to the situation that is plaguing our beloved nation in the North and South West regions”  He went further to propose that “amnesty be granted to all those who are detained because of their political ideologies, and those detained because of crimes within this period, should be detained and tried in regions where they were arrested so that their rights to be cared for by family members and friends would be guaranteed” | | | | | | | | | | | | | |  |
|  | | |  |
|  | | |  | | | | | | | | | | | | | |  |
|  | | | | | | | | | | | | 11 |  | CP |  | 12/12/2022 12:39 AM |  |
|  | | | As the curtains were pulled over the last session of the Higher Judicial Council Wednesday June 7 at the Unity Palace, the echoes of the Anglophone crisis appeared to have made an impact with the appointment of the first Anglophone since independence into the Judicial Chamber of the Supreme Court.  The coming of Epuli Mathias Aloh into the limelight also heralded the departure of Ayah Paul Abine who was shown the door into senior citizenship. His appointment comes 17 years after mounting the podium into the Supreme Court, though he has been at the National Anti Corruption Commission (CONAC) since 2011. | | | | | | | | | | | | | |  |
|  | | |  | | | | | | | | | | | | | |  |
|  | | | | | | | | | | | | 12 |  | CP |  | 12/9/2022 2:31 AM |  |
|  | | | After twenty months of clashes, the government and the separatists are both refusing to give ground. Both sides must explore compromise solutions aimed at a level of regional autonomy somewhere between the secession the separatists yearn for and the fake decentralisation proposed by Yaoundé. | | | | | | | | | | | | | |  |
|  | | |  | | | | | | | | | | | | | |  |
|  | | | | | | | | | | | | 13 |  | CP |  | 12/12/2022 12:18 AM |  |
|  | | | Crisis Group’s Senior Analyst for Central Africa Hans De Marie Heungoup talks about how Cameroonian and international actors can play to break the deadlock and encourage the two sides to make concessions.  I. | | | | | | | | | | | | | |  |
|  | | |  | | | | | | | | | | | | | |  |
|  | | | **Nodes\\Protest** | | | | | | | | | | | | | |  |
|  |  | No |  | 0.0030 |  | 3 |  | | | | | | |
|  | | |  |  |  |  |  |  |  |  | | | | | | | |
|  | | | | | | | | | | | | 1 |  | CP |  | 12/7/2022 11:44 PM |  |
|  | | | A group of woman under the canopy of the Southwest-Northwest Women Task Force (SNWOT) today staged a sit down protest calling for  ceasefire between the two warring parties in the ongoing conflict in Cameroon’s two English speaking regions. The cry of lamentations as they called it was staged in the confines of the Bamenda Municipal Stadium, minimizing its impact.  “We want peace” “we are tired of the war” “our children are dying every day” “Let the war come to an end” “the women cried out loud in pain” were some of the many messages displayed on placards. Others carried the peace plant “Nkeung” as a reminder of the need for peace. | | | | | | | | | | | | | |  |
|  | | |  | | | | | | | | | | | | | |  |
| Reports\\Coding Summary By Source Report | | | | | | | | | | | Page 38 of 146 | | | | | | |
| 1/21/2023 3:45 PM | | | | | | | | | | | | | | | | | |
|  | | | **Classification** |  | **Aggregate** |  | **Coverage** |  | **Number Of Coding References** |  | | **Reference Number** |  | **Coded By Initials** |  | **Modified On** |  |
|  | | | | | | | | | | | | | | | | | |
|  | | | | | | | | | | | | 2 |  | CP |  | 12/12/2022 12:48 AM |  |
|  | | | A crowd of Southern Cameroonians (Amazonians) stormed the hotel where president Paul  Biya and wife Chantal are staying in New York. The protesters blocked the hotel's entrance, preventing Paul Biya and his delegation from making the slightest move. According to reports, the President of the Republic reportedly instructed the Cameroon ambassador to the United States to ask the US government to disperse the demonstrators.  This demonstration came a few hours after those by the Anglophone population in several cities, towns and villages of the Southern Cameroon. | | | | | | | | | | | | | |  |
|  | | |  | | | | | | | | | | | | | |  |
|  | | | | | | | | | | | | 3 |  | CP |  | 12/9/2022 12:06 AM |  |
|  | | | Many youths of Ebonji, Tombel Sundivision in the  Kupe Muanenguba Division of the South West have taken to the streets of the locality with peace plants and chanting "no bribery, no bribery" in response to a government move to  deplored CPDM elites in all 13 divisions of the Northwest and Southwest regions to meet with the disgruntle population to address the on-going Anglophone Crisis. | | | | | | | | | | | | | |  |
|  | | |  | | | | | | | | | | | | | |  |
|  | | | **Nodes\\Responsibility** | | | | | | | | | | | | | |  |
|  |  | No |  | 0.0155 |  | 13 |  | | | | | | |
|  | | |  |  |  |  |  |  |  |  | | | | | | | |
|  | | | | | | | | | | | | 1 |  | CP |  | 12/7/2022 11:40 PM |  |
|  | | | Cameroon is being sued for blocking the internet in its Anglophone regions  Two international digital rights advocacy groups have joined the growing clamor to stop Cameroon’s government disrupting internet services in its Anglophone regions.  Access Now and Internet Sans Frontières (ISF) have intervened on behalf a consortium of local and regional civil society organizations who previously sued the government for blocking access to the internet in the South West and North West English-speaking regions. In court documents filed to the constitutional council and seen by Quartz, the organizations say the current shutdown violates the rights to freedom of expression, access to information, non-discrimination based on language, and hinders economic, social, and cultural rights.  The filings, the first of its kind against a government by the organizations, seek to show the internet cut-off was violating regional and international frameworks that support the right to seek, receive and impart information and ideas through digital means. The petitioners also hope to show that the blanket ban was not proportionate and that the government failed to present a legitimate aim for the blackout. | | | | | | | | | | | | | |  |
|  | | |  |
|  | | |  | | | | | | | | | | | | | |  |
|  | | | | | | | | | | | | 2 |  | CP |  | 12/7/2022 11:55 PM |  |
|  | | | The peaceful protests in late 2016 precipitated a bloody civil  war that started the next year when security forces opened fire on crowds from  helicopters, and Ambazonia separatists fought back against troops who have been  torching villages and beating and killing people whom they believe support the  Ambazonians. | | | | | | | | | | | | | |  |
|  | | |  | | | | | | | | | | | | | |  |
|  | | | | | | | | | | | | 3 |  | CP |  | 12/8/2022 1:20 AM |  |
|  | | | Hon.  Joseph Wirba captured the attention of the world and the hearts of Anglophone Cameroonians in December 2016 during the 3rd session of parliament where he took to the rostrum to vehemently defied and accused the Yaounde regime  and its forces of atrocities against Anglophones students and the general population and of systemic policies of marginalization of the Anglophones in the Cameroon union.   His speech in that session (“I injustice becomes law, resistance becomes a duty”) has been credited in many quarters for inspiring the Anglophone struggle today by uniting the entire Anglophone community behind the teachers’ and lawyers’ strike that has since brought the two Anglophone regions into a standstill with a general civil disobedience movement against the authorities in Yaoundé.  Hon. Wirba’s presence at this session of parliament was highly anticipated by all for various reasons. There were romours before this session that his parliamentary immunity would be uplifted to pave the way for his arrest for inciting and promoting the Anglophone crisis. This was considered so because Mancho Bibixy, Dr Fontem Niba and Barrister Nkongo Bella and scores of other Anglophones have been arrested and transferred to Yaoundé since he made that speech.  The vice president of the National Assembly, Hon. Mbah Ndam Joseph and member of the SDF party to which Hon. Wirba belonged to in an interview with Cameroon-info.net said he was was simply absent from the opening session like other MPs. | | | | | | | | | | | | | |  |
|  | | |  |
|  | | |  | | | | | | | | | | | | | |  |
|  | | | | | | | | | | | | 4 |  | CP |  | 12/12/2022 1:02 AM |  |
|  | | | Dr. Christopher Fomunyoh founder of “The Fomunyoh Foundation”(TFF) has praised the efforts of the Cameroonian press is promoting liberties in the country. He was speaking at a press dinner which also doubled as working session with members of his foundation and the reception of a special traditional gift from a friend on Friday September 1, 2017.  Dr Fomunyoh said the press in Cameroon is “helping to advocate for more open space for debate and dialogue, for working so hard to strengthen freedoms of the press and other liberties that are pillars of every democratic society”  He assured the press men that they can always count on his support | | | | | | | | | | | | | |  |
|  | | |  | | | | | | | | | | | | | |  |
| Reports\\Coding Summary By Source Report | | | | | | | | | | | Page 39 of 146 | | | | | | |
| 1/21/2023 3:45 PM | | | | | | | | | | | | | | | | | |
|  | | | **Classification** |  | **Aggregate** |  | **Coverage** |  | **Number Of Coding References** |  | | **Reference Number** |  | **Coded By Initials** |  | **Modified On** |  |
|  | | | | | | | | | | | | | | | | | |
|  | | | | | | | | | | | | 5 |  | CP |  | 12/8/2022 1:42 AM |  |
|  | | | The Killing of two gendarme officers in Bamenda in the wee hours of Wednesday has been claimed by the Ambazonian Defense Forces –ADF according to a report by the Reuters News Agency.  The report states “Cho Ayaba, a leading member of the Ambazonian Governing Council, a separatist body established to create an independent state called Ambazonia, said secessionist militants killed three gendarmes in two coordinated attacks in Bamenda, the capital of the predominantly English-speaking Northwest region” | | | | | | | | | | | | | |  |
|  | | |  | | | | | | | | | | | | | |  |
|  | | | | | | | | | | | | 6 |  | CP |  | 12/8/2022 1:54 AM |  |
|  | | | The Early Day Motion 1189 is sponsored by Hywel Williams of Plaid Cymru party and supported by MPS from across the British political divide including MPs from the Labour and Conservative parties and the Scottish National Party. The Early Day Motion 1189 titled the “Anglophone Crisis in Cameroon” was tabled on the 24 of April 2018.  The motion reads “That this House condemns the violence and state oppression imposed by the Government of Cameroon in the Anglophone regions of the country; highlights with regret that over 20,000 refugees from Cameroon have been registered by the UNHCR in their camps across the border in Nigeria; acknowledges reports that an estimated 1,000 people have been detained and 100 people shot for opposing the Government’s oppression of the English-speaking | | | | | | | | | | | | | |  |
|  | | |  |
|  | | |  | | | | | | | | | | | | | |  |
|  | | | | | | | | | | | | 7 |  | CP |  | 12/8/2022 2:00 AM |  |
|  | | | Unlike other autocratic leaders in Africa who take a more “hands-on” leadership approach, Biya is known for his “hands-off” style of rule. Like many Cameroonians, Affana notes that Biya uses public funds in the country with a high poverty rate to sustain a bureaucracy of 65 sycophantic ministers and state secretaries. He mostly governs by decree or with the help of laws rushed through a rubber-stamp parliament. | | | | | | | | | | | | | |  |
|  | | |  | | | | | | | | | | | | | |  |
|  | | | | | | | | | | | | 8 |  | CP |  | 12/8/2022 2:22 AM |  |
|  | | | “Sitting with him in his cabinet, I told the Minister that my people have been suffering a lot of injustice for the past 40 years. I told him that if they do not initiate dialogue, the problems will end up breaking Cameroon,” Wirba said.  According to Hon. Wirba, the Minister responded thus: “Mr. Wirba, it is your people (Anglophones) who came to us.”  Wirba told the National Assembly that he interpreted the Minister’s statement to mean that since West Cameroonians accepted to join La Republique du Cameroun, they could be maltreated with impunity. | | | | | | | | | | | | | |  |
|  | | |  | | | | | | | | | | | | | |  |
|  | | | | | | | | | | | | 9 |  | CP |  | 12/9/2022 12:04 AM |  |
|  | | | The Director of Cabinet at the Prime Minister’s office, Ghogomu Paul Mingo, former cabinet minister and Director of the CPDM Academy Elvis Ngolle Ngolle and the technical adviser to the Prime Minister's office, Professor Fabien Nkot, will travel to the United States from the 3rd to 9th of August 2017.  According to the letter, their mission is to provide Cameroonians living in the US and the American authorities, clarification on the situation prevailing in the Northwest and South-West Regions of the country.  The US has recently taken some interest in the crisis with some members of Senate writing to the State Department to look into human right abuses by the Cameroon government on its Anglophone community. | | | | | | | | | | | | | |  |
|  | | |  |
|  | | |  | | | | | | | | | | | | | |  |
|  | | | | | | | | | | | | 10 |  | CP |  | 12/9/2022 12:05 AM |  |
|  | | | The chairman of the United Socialist Democratic Party Prince Michael Ngwese Ekosso has called on the government of Cameroon to look back at the foundation that formed this Republic and address the root causes else the current stalemate will not be broken. He blames the current prevalence on the divide and rule tactics implore by the state of Cameroon. In an exclusive interview with Ndi Tsembom Elvis, he stated the following.  Q. What is your party’s stand on the current Anglophone Crisis? | | | | | | | | | | | | | |  |
|  | | |  | | | | | | | | | | | | | |  |
|  | | | | | | | | | | | | 11 |  | CP |  | 12/9/2022 2:21 AM |  |
|  | | | The UN has called on Cameroon “to support inclusive dialogue efforts to address the outstanding root causes of the tensions “in the Anglophone regions of the country. This is contained in a statement released by the world’s body on August 8, after meeting with a Cameroonian delegation to New York. | | | | | | | | | | | | | |  |
|  | | |  | | | | | | | | | | | | | |  |
|  | | | | | | | | | | | | 12 |  | CP |  | 12/9/2022 2:25 AM |  |
|  | | | am truly saddened by the loss of human lives in the search for their dignity within their own homeland; deaths we must put at the doorsteps of Mr. Biya, because of his lack-lustre handling of the crisis. | | | | | | | | | | | | | |  |
|  | | |  | | | | | | | | | | | | | |  |
|  | | | | | | | | | | | | 13 |  | CP |  | 12/9/2022 2:27 AM |  |
|  | | | Cameroon’s leading opposition party the Social Democratic Front-SDF has put the blame for the ongoing Anglophone crisis at the feet of President Paul Biya, saying “the responsibility to resolve this crisis rests on the shoulders of Mr. Biya and his shoulders alone” The SDF also finds fault in the regime management of crisis in the country.  This is contained in a statement by the Party chair Ni John | | | | | | | | | | | | | |  |
|  | | |  | | | | | | | | | | | | | |  |
| Reports\\Coding Summary By Source Report | | | | | | | | | | | Page 40 of 146 | | | | | | |
| 1/21/2023 3:45 PM | | | | | | | | | | | | | | | | | |
|  | | | **Classification** |  | **Aggregate** |  | **Coverage** |  | **Number Of Coding References** |  | | **Reference Number** |  | **Coded By Initials** |  | **Modified On** |  |
|  | | | **Nodes\\Security and Defense** | | | | | | | | | | | | | |  |
|  |  | No |  | 0.0078 |  | 6 |  | | | | | | |
|  | | |  |  |  |  |  |  |  |  | | | | | | | |
|  | | | | | | | | | | | | 1 |  | CP |  | 12/7/2022 11:37 PM |  |
|  | | | The government of Cameroon has been urged to urgently initiate dialogue so as to curb the ongoing crisis in the two Anglophone Regions of Cameroon.  The Secretary General of Commonwealth, Patricia Scotland, made the call last December 22 during a press conference marking the end of her five days official visit to Cameroon.  Presenting her balance for the past five days in Cameroon, the Secretary General said after listening to the various political parties in Cameroon, religious leaders, youths and the civil society organisations, everything boiled down to dialogue which should be initiated immediately.  Here her, “I had the great opportunity and privilege of speaking to the Prime Minister, sharing with him all the things that have ben shared with me all these days and I think initiating dialogue is needed seriously. Government now has to consider what they wish to do as we go forward but most importantly, we need to be committed,” Patricia Scotland said. | | | | | | | | | | | | | |  |
|  | | |  |
|  | | |  | | | | | | | | | | | | | |  |
|  | | | | | | | | | | | | 2 |  | CP |  | 12/7/2022 11:48 PM |  |
|  | | | The governor of the N.W Region of Cameroon, Adolf Lele Lafrique has called on the population of his region of command to remain the peace loving, law abiding and above all God fearing citizens that they’ve always been in the face of the ongoing sociopolitical and security turmoil rocking the region. He made this call last Friday September 14 2018 in a press release he read out to media persons in the MINEPAT regional delegation conference hall, Up Station, Bamenda.  He began by first announcing to the entire population of the region that following the growing acts of killing, kidnapping for ransom, looting of property, destruction of personal documents and generalized vandalism perpetrated against pupils, students, teachers, innocent civilian masses and the defence and security forces accompanied by threats from secessionist activities promising to ground socioeconomic activities and hinder circulation of persons within, into and out of the region in the days ahead, government has taken appropriate measures following very high instructions from the Head of State to guarantee the collective safety and security of the movements and activities of the inhabitants of the region through the end of year festivities and stop trouble makers. | | | | | | | | | | | | | |  |
|  | | |  |
|  | | |  | | | | | | | | | | | | | |  |
|  | | | | | | | | | | | | 3 |  | CP |  | 12/8/2022 12:38 AM |  |
|  | | | Factions of some armed groups in the anglophone conflict have even called for and are observing a cease fire. But fingers are now pointing at such groups as “blacklegs” to their “struggle”. | | | | | | | | | | | | | |  |
|  | | |  | | | | | | | | | | | | | |  |
|  | | | | | | | | | | | | 4 |  | CP |  | 12/8/2022 12:45 AM |  |
|  | | | The Cameroon National Journalists’ Union known by its French acronym as SNJC has issued a strongly worded statement calling on its members (mostly French speaking journalists) to give a fair and equitable room to all opinions express by Cameroonians on the Anglophone crisis, federalism and secession. Below is the translated version (by Bamenda Online) of the statement.  “The National Union of Cameroon Journalists  condemns in strong terms the decision of the National Communication Council  against the media on the Anglophone crisis in the country.  On January 20, 2017, the president of the National Communication Council (NCC), Peter Essoka, read a statement on CRTV, warning media houses about how they treat the current crisis in Northwest and South-West Regions. Among other things, the communiqué prohibits the media organs from addressing issues related to federalism and secession. | | | | | | | | | | | | | |  |
|  | | |  |
|  | | |  | | | | | | | | | | | | | |  |
|  | | | | | | | | | | | | 5 |  | CP |  | 12/8/2022 1:30 AM |  |
|  | | | the same time proposed that “in order to diffuse the current socio-political impasse in the Northwest and Southwest and make the learning environment conducive for both students and lecturers, Government should release all persons arrested in connection  with the current Anglophone crisis” | | | | | | | | | | | | | |  |
|  | | |  | | | | | | | | | | | | | |  |
|  | | | | | | | | | | | | 6 |  | CP |  | 12/12/2022 12:37 AM |  |
|  | | | Against a backdrop of bomb blasts, sporadic violence and repressive state measures, Cameroon’s Anglophone crisis has entered a new and intensified phase. In order to prevent the outbreak of an armed uprising, Cameroon’s president must go beyond superficial measures by urgently implementing key reforms and pursuing inclusive, high-level dialogue mediated by the UN or African Union. (read below the complete report by the International Crisis group) | | | | | | | | | | | | | |  |
|  | | |  | | | | | | | | | | | | | |  |
|  | | | | | | | | | | | | | | | | | |
| Reports\\Coding Summary By Source Report | | | | | | | | | | | Page 41 of 146 | | | | | | |
| 1/21/2023 3:45 PM | | | | | | | | | | | | | | | | | |
|  | | | **Classification** |  | **Aggregate** |  | **Coverage** |  | **Number Of Coding References** |  | | **Reference Number** |  | **Coded By Initials** |  | **Modified On** |  |
|  | | | **Nodes\\Violence** | | | | | | | | | | | | | |  |
|  |  | No |  | 0.0088 |  | 9 |  | | | | | | |
|  | | |  |  |  |  |  |  |  |  | | | | | | | |
|  | | | | | | | | | | | | 1 |  | CP |  | 12/7/2022 11:51 PM |  |
|  | | | The crisis in the Anglophone regions has taken a heavy toll on education. Separatists and unknown assailants have damaged, destroyed, or burnt down scores of schools and kidnapped hundreds of students across the regions. | | | | | | | | | | | | | |  |
|  | | |  | | | | | | | | | | | | | |  |
|  | | | | | | | | | | | | 2 |  | CP |  | 12/7/2022 11:54 PM |  |
|  | | | Security officials searching civilians in Bamenda in the restive Northwest Cameroon  (CN) — Beheaded corpses. Entrails spilled onto dusty roads. Photos from the civil war raging in his home country Cameroon nauseate the professor. “Sometimes I wake up and on my WhatsApp feed there’s some pictures I cannot even take, I just have to delete, they’re gruesome,” he said.  It’s time for the world  to wake up, he says, to the conflict in that has displaced more than  400,000 people and left at least 1,800 dead as government forces battle groups of  separatist fighters and burn villages inhabited by suspected separatist  sympathizers to the ground.  The separatists’ goal is to win independence for western regions  of Cameroon, on the border with Nigeria, and create an independent country  called Ambazonia for English-speaking residents who feel they’ve been relegated  to second-class citizens by a president who has been in office for 37 years and  foists the government’s preferred language on them. | | | | | | | | | | | | | |  |
|  | | |  |
|  | | |  |
|  | | |  | | | | | | | | | | | | | |  |
|  | | | | | | | | | | | | 3 |  | CP |  | 12/8/2022 1:21 AM |  |
|  | | | Tongues continue to wag in silence as to who could have been behind the fire disaster in Bamenda that engulfed over 40 makeshift and 10 lockup sheds in the Bamenda Food Market last Tuesday March 13, 2017.  Despite some blind arrests made the following day, the police have not been able to shed more lights about the incident, leaving several conspiracy theories to fill the already rumour festive town of Bamenda and the Northwest region. A day after the fire disaster, the police were very prompt to react to a call by some roadside sellers and informants that they were being prevented from selling by the Market Master. | | | | | | | | | | | | | |  |
|  | | |  | | | | | | | | | | | | | |  |
|  | | | | | | | | | | | | 4 |  | CP |  | 12/12/2022 12:59 AM |  |
|  | | | The fire consumed the 7th to the 4th floor and part of the 3rd , housing various offices including those of the  Vice-Presidents, the Deputy Secretary General, the SDF  parliamentary Group Office, the Directorate of Budget, committee rooms amongst many others. But the hemicycle, where national assembly holds in plenary sessions was spared by the fire.  The fire reportedly started around 10pm on the night of Thursday November 16, 2017b on the 7th floor, and spreading downward.  The ravaging fire was tamed by the intervention of the  Yaoundé Army Rescue Unit backed by those of Yaoundé-Nsimalen international airport and that Cameroon Petroleum Depot (SCDP). | | | | | | | | | | | | | |  |
|  | | |  | | | | | | | | | | | | | |  |
|  | | | | | | | | | | | | 5 |  | CP |  | 12/8/2022 1:51 AM |  |
|  | | | Unidentified individuals yesterdy at about 10:30 pm attempted to set ablaze the residence of the National Chairman of the SDF, Ni John Fru Ndi in the Ntarikon neigbourhood. The fire was put out by neighbours who rushed to the scene minutes after. No substantial damage was caused by the fire. The attempt comes days after the holding of the 9th SDF Convention at the Bamenda Congress Hall despite threats from supposed Anglophone secessionists calling on the party not to hold it due to th ongoing Anglophone Crisis and to rather focus its efforts on finding a solution to the crisis. | | | | | | | | | | | | | |  |
|  | | |  | | | | | | | | | | | | | |  |
|  | | | | | | | | | | | | 6 |  | CP |  | 12/12/2022 12:54 AM |  |
|  | | | The head coach of Yong Sport Academy Bamenda, Emmanuel Ndoumbe Bosso who was kidnapped yesterday by unidentified gunmen has been released. He was release a few hours after as confirmed by the Communication Unit of YOSA. A state issued after his released states;  “The Management of Yong Sport Academy can confirm that Coach Emmanuel Ndoumbe Bosso | | | | | | | | | | | | | |  |
|  | | |  | | | | | | | | | | | | | |  |
|  | | | | | | | | | | | | 7 |  | CP |  | 12/8/2022 2:12 AM |  |
|  | | | The statement “strongly condemn the capture and illegal detention of Rev. Fr Paul Njokikang” the reason for his arrest is not yet known but believed not to be unconnected to the anglophone crisis. His arrest also seems to follow a new pattern following the arrest of Islamic Scholar Abdul Karim and journalist Samuel Wazizi  of CMTV for openly speaking against the Yaounde’s handling of the crisis in the two English speaking regions of the country. | | | | | | | | | | | | | |  |
|  | | |  | | | | | | | | | | | | | |  |
| Reports\\Coding Summary By Source Report | | | | | | | | | | | Page 42 of 146 | | | | | | |
| 1/21/2023 3:45 PM | | | | | | | | | | | | | | | | | |
|  | | | **Classification** |  | **Aggregate** |  | **Coverage** |  | **Number Of Coding References** |  | | **Reference Number** |  | **Coded By Initials** |  | **Modified On** |  |
|  | | | | | | | | | | | | | | | | | |
|  | | | | | | | | | | | | 8 |  | CP |  | 12/12/2022 12:46 AM |  |
|  | | | Following the arrest of the Julius Ayuk Tabe President of the Ambazonia Interim Government, and some of his close collaborators in Abuja on January 5, 2018 by the Nigerian Special Forces and their subsequent extradition to Cameroon, a dark cloud seems to have moved over both Anglophone regions of Cameroon, provoking a series of attacks by unidentified individuals, a heavy crack down on the civilian population by the military and a series curfew and ghost towns. | | | | | | | | | | | | | |  |
|  | | |  | | | | | | | | | | | | | |  |
|  | | | | | | | | | | | | 9 |  | CP |  | 12/9/2022 12:14 AM |  |
|  | | | Today, with the arrest of Ayuk and Co. the crisis has moves from simple hit and run attacks to very bold attacks on security forces and installations to kidnapping of administrative official, a big hit on the government if we must accept. | | | | | | | | | | | | | |  |
|  | | |  | | | | | | | | | | | | | |  |
|  | **Internals\\Cameroon Tribune** | | | | | | | | | | | | | | | |  |
|  | | **Node** | | | | | | | | | | | | | | |  |
|  | | | **Nodes\\Conflict** | | | | | | | | | | | | | |  |
|  |  | No |  | 0.0292 |  | 25 |  | | | | | | |
|  | | |  |  |  |  |  |  |  |  | | | | | | | |
|  | | | | | | | | | | | | 1 |  | CP |  | 1/21/2023 12:56 AM |  |
|  | | | The college of four lawyers defending the magistrate say existing laws were violated in the arrest and so he should be freed. Close-door deliberations on whether or not the request should be granted began at the Mfoundi High Court in Yaounde yesterday March 16, 2017. This was under the President, Nke Joseph Marie, State Prosecutor, Tang Ruben and Court Registrar, Ekassi Renee. Barrister Luke Kisob led a college of four lawyers to defend the incarcerated super-scale magistrate Ayah Paul Abine. | | | | | | | | | | | | | |  |
|  | | |  | | | | | | | | | | | | | |  |
|  | | | | | | | | | | | | 2 |  | CP |  | 1/21/2023 1:03 AM |  |
|  | | | While rumors are rife that Bamenda will witness a ghost town this Monday January 9, the government has embarked on a campaign to call on teachers, students and pupils to resume classes. Despite this, most parents are still skeptical to send their children to school. In the North West regional capital of Bamenda most parents say they will not send their children to school because the whole town is militarized and there is an aura of fear of the unknown. | | | | | | | | | | | | | |  |
|  | | |  | | | | | | | | | | | | | |  |
|  | | | | | | | | | | | | 3 |  | CP |  | 1/21/2023 1:15 AM |  |
|  | | | Consortium of Parents with children in some mission academic schools claim FCFA 150 billion from respective officials accused for refusing to teach their children. Anew development has emerged in the anglophone crisis with some church leaders and college principals summoned to appear before the Bamenda and Buea courts of 1st instance on April 21st, 2017. The direct summons at the request of a certain consortium of parents whose children are in some mission academic institutions want the Catholic Archbishop of Bamenda His Grace Cornelius Fontem Esua along with the president of the provincial Episcopal conference His Lordship George Nkuo, the principals of Sacred Heart college, St Bedes college and our Lady of Lourds college, the Executive President of the Cameroon Baptist Convention (CBC) Rev. Ncham Godwill and the Moderator of the PCC to answer charges which include.; failure | | | | | | | | | | | | | |  |
|  | | |  |
|  | | |  | | | | | | | | | | | | | |  |
|  | | | | | | | | | | | | 4 |  | CP |  | 1/21/2023 1:43 AM |  |
|  | | | Le communiqué de presse du président du Conseil national de la Communication parvenu à notre Rédaction. «Le président du Conseil national de la Communication (CNC) constate avec regret que, dans leurs productions médiatiques, notamment sur la crise en cours dans les régions du Nord-Ouest et du Sud-Ouest, certains professionnels des médias, en violation des règles éthiques et déontologiques de la communication sociale, ont choisi, souvent par la publication d’informations sans fondement et sans vérification, d’inciter l’opinion à la violence et à la haine à travers les contenus médiatiques. Des telles pratiques non professionnelles exacerbent les tensions déjà existantes sur nos chères valeurs nationales d’unité, d’intégration et de paix sociale en mettant ainsi en péril notre poursuite collective des nobles idéaux du pluralisme, de démocratie, du multiculturalisme et du vivre-ensemble. | | | | | | | | | | | | | |  |
|  | | |  |
|  | | |  | | | | | | | | | | | | | |  |
|  | | | | | | | | | | | | | | | | | |
| Reports\\Coding Summary By Source Report | | | | | | | | | | | Page 43 of 146 | | | | | | |
| 1/21/2023 3:45 PM | | | | | | | | | | | | | | | | | |
|  | | | **Classification** |  | **Aggregate** |  | **Coverage** |  | **Number Of Coding References** |  | | **Reference Number** |  | **Coded By Initials** |  | **Modified On** |  |
|  | | | | | | | | | | | | | | | | | |
|  | | | | | | | | | | | | 5 |  | CP |  | 1/21/2023 1:44 AM |  |
|  | | | «The President of the National Communication Council observes with regret that in their reporting, especially of the ongoing crisis in the North West and South West Regions, certain media organs and journalists have, with brazen and recurrent disregard for professional ethics, been failing to sift incitement to violence and hate from their content, often crafting and spreading fake news without full verification. Such unprofessional practices only serve to deepen the already existing strains on our cherished national values of unity, integration and social peace, as well as endanger our collective pursuit of the lofty ideals of pluralism, democracy, multiculturalism and togetherness. As the nation celebrates the 46th National Day on May 20, 2018 under the theme, “Cameroonian citizens, let us remain united in diversity and preserve social peace, for a stable, indivisible and prosperous Cameroon,” the President of the National Communication Council seizes the opportunity | | | | | | | | | | | | | |  |
|  | | |  |
|  | | |  | | | | | | | | | | | | | |  |
|  | | | | | | | | | | | | 6 |  | CP |  | 1/21/2023 1:53 AM |  |
|  | | | Le phénomène a peut-être connu son apogée au Cameroun cette année, entre la crise au Nord-Ouest et au Sud-Ouest la présidentielle 2018. Crise dans les régions du Nord-Ouest et du Sud-Ouest et élection présidentielle 2018. C'est sûrement les deux théâtres d'opération qui ont subi le plus de fake news lors de cette année écoulée. Entre vidéos, photos et éléments sonores détournés, documents prétendument officiels annonçant telle ou telle autre mesure, donnant des « instructions », révélations fracassantes, faux comptes créés sur les réseaux sociaux pour partager de fausses informations ou encore, et surtout, distiller la haine. Avec une cote d'alerte tellement élevée, surtout pour la crise au Nord-Ouest et au Sud-Ouest NoSo, que les émissaires de Facebook n'ont pas hésité à faire le déplacement pour le Cameroun en août 2018, entre ateliers en direction des médias et de la société civile, rencontres avec les autorités. | | | | | | | | | | | | | |  |
|  | | |  |
|  | | |  | | | | | | | | | | | | | |  |
|  | | | | | | | | | | | | 7 |  | CP |  | 1/21/2023 2:12 AM |  |
|  | | | Face à l’intransigeance observée chez les représentants des syndicats, des associations ont été interdites hier. Ainsi donc, les travaux du Comité interministériel ad hoc chargé d’examiner et de proposer des solutions aux préoccupations soulevées par les syndicats des enseignants anglophones sont achevés, comme l’indique le communiqué de presse rendu public avant-hier par son président, le Pr. Ghogomu Paul Mingo. Même si ce dernier rappelle la « détermination du gouvernement à poursuivre le dialogue sur les questions relatives à l’amélioration du système éducatif camerounais (sous-systèmes anglophone et francophone), ceci dans le cadre de l’instance statutaire créée à cet effet par le Premier ministre le 8 novembre 2016. Pour l’ensemble de l’opinion camerounaise, l’heure est aujourd’hui au respect des différents engagements des parties pour permettre une reprise sereine des classes dans ces deux régions. Les cours ici ayant été interrompus depuis la fin du mois de novembre 2016. L’on peut déjà signaler ici que le | | | | | | | | | | | | | |  |
|  | | |  |
|  | | |  | | | | | | | | | | | | | |  |
|  | | | | | | | | | | | | 8 |  | CP |  | 1/21/2023 2:21 AM |  |
|  | | | Mezam Senior Divisional Officer inspires business community to ignore ghost town Inhabitants of Bamenda and its neighbourhoods woke up to another ghost town experience on Monday, January 30, 2017 with shops and markets shut, taxis and commercial motorcycles were off the streets. A few courageous commercial bikes riders that ignored the ghost town were quick to retire into the quarters following reports of threats and assaults on their colleagues in some parts of the city. The day was similar to previous ghost town days with most inhabitants remaining indoors while others trekked to respect appointments. Inhabitants appear at a loss how soon the ghost town calls will be history. | | | | | | | | | | | | | |  |
|  | | |  | | | | | | | | | | | | | |  |
|  | | | | | | | | | | | | 9 |  | CP |  | 1/21/2023 2:23 AM |  |
|  | | | There were more bikes and private cars on the streets on day two of ghost town, Tuesday January, 31, 2017 Day two of the ghost town on Tuesday January 31, 2017 featured a major development with more commercial motorcycles on the streets of Bamenda. Some courageous commercial motorcycle riders decided to defy the ghost town as they criss-crossed the streets charging more than the normal FCFA 200 per drop. They were conspicuous around Finance Junction, Mobile Nkwen and Commercial Avenue. Equally visible on the streets were few clandestine vehicles transporting passengers from Finance Junction towards Mbouda, Bafoussam and Dschang in the West Region. | | | | | | | | | | | | | |  |
|  | | |  | | | | | | | | | | | | | |  |
|  | | | | | | | | | | | | 10 |  | CP |  | 1/21/2023 2:29 AM |  |
|  | | | “Channels of Dialogue Have Opened” Barrister Harmony Bobga, Common Law Lawyers leader. “The channels for dialogue have opened after we met the Prime Minister, Head of Government in Bamenda. Nothing concrete emerged from the consultations beyond the opening of a window of opportunities for dialogue to prevail. It is on this account that the Common Law Lawyers strike action continues while we have been directed to open up to an enlarged meeting with the Minister of State, Minister of Justice. We will be signing a Memo with the Prime Minister to include a request for the meeting with the Minister of Justice. We hope that the government will have the same open mindedness as we have | | | | | | | | | | | | | |  |
|  | | |  | | | | | | | | | | | | | |  |
|  | | | | | | | | | | | | | | | | | |
| Reports\\Coding Summary By Source Report | | | | | | | | | | | Page 44 of 146 | | | | | | |
| 1/21/2023 3:45 PM | | | | | | | | | | | | | | | | | |
|  | | | **Classification** |  | **Aggregate** |  | **Coverage** |  | **Number Of Coding References** |  | | **Reference Number** |  | **Coded By Initials** |  | **Modified On** |  |
|  | | | | | | | | | | | | | | | | | |
|  | | | | | | | | | | | | 11 |  | CP |  | 1/21/2023 2:35 AM |  |
|  | | | L’intégralité du propos liminaire du ministre de la Communication lors de son point de presse vendredi dernier à Yaoundé. « Mesdames, messieurs les journalistes Je vous souhaite à toutes et à tous une chaleureuse bienvenue à l’occasion de cet échange auquel je vous ai conviés, afin que nous débattions d’une actualité de la plus haute importance. En effet, le Département d’État américain vient de publier un communiqué de presse faisant état d’atteintes diverses aux libertés fondamentales au Cameroun, notamment dans la gestion des manifestations à Bamenda et à Buea. Dans le souci d’une information exacte de l’opinion publique nationale et internationale sur les allégations y contenues, le Gouvernement camerounais tient à rétablir la vérité sur certains faits. S’agissant de l’action des pouvoirs publics dans le cadre de la gestion des récentes manifestations survenues à Bamenda et à Buea, le Gouvernement s’est attelé à maintenir le dialogue et la concertation, dans le but de trouver des solutions appropriées aux revendications des avocats et des enseignants d’expression anglaise. Sous ce registre, des mesures appropriées ont été prises, en l’occurrence : - la visite de travail à Bamenda du Premier ministre, Chef du gouvernement, du 25 au 27 novembre 2016, à l’effet de discuter avec les représentants des avocats et des enseignants; - la création, par le Premier ministre, Chef du gouvernement, d’un comité interministériel chargé d’examiner les problèmes des enseignants ; - l’ouverture des négociations sectorielles, à la diligence respective du Ministre d’État, ministre | | | | | | | | | | | | | |  |
|  | | |  |
|  | | |  | | | | | | | | | | | | | |  |
|  | | | | | | | | | | | | 12 |  | CP |  | 1/21/2023 2:40 AM |  |
|  | | | Below is the introductory statement of the Minister of Communication, Issa Tchiroma Bakary during a press conference on December 2, 2016 in Yaounde. Distinguished Journalists, Ladies and Gentlemen, I wish you all a warm welcome to this exchange on an issue of utmost importance. As a matter of fact, the U.S. Department of State has just published a Press Statement alleging infringement on fundamental freedoms in Cameroon, notably in the management of demonstrations in Bamenda and Buea. In a bid to avoid any controversy on the allegations contained in the press statement and in order to enlighten national and international community, the Government of Cameroon would like to draw attention on some issues. With regard to the action of Public Authorities in the management of recent demonstrations which took place in Bamenda and Buea, the Government has made efforts to maintain dialogue and cohesion, to seek appropriate solutions to the grievances | | | | | | | | | | | | | |  |
|  | | |  |
|  | | |  | | | | | | | | | | | | | |  |
|  | | | | | | | | | | | | 13 |  | CP |  | 1/21/2023 2:42 AM |  |
|  | | | Security forces dislodge some youths preventing shops, Commercial Motorcycle riders from activities in Bamenda. Bamenda ended Monday December 5, 2016 in calm after some clashes that pitted security forces and some unidentified youths who attempted to prevent shops and commercial motorcycle riders from regular activities. The population was gripped by fear of a strike action allegedly called by traders, taxi drivers and commercial motorcycle riders. Tracts circulated over the weekend announcing the strike in solidarity with striking lawyers and teachers. That is perhaps, why many shops remained shot while very few taxis and commercial motorcycles circulated early in the morning. By midday, virtually all the streets were empty with only private cars and some commercial motorcycles circulating while security forces had some running battles with some youths who attempted to erect barricades on | | | | | | | | | | | | | |  |
|  | | |  |
|  | | |  | | | | | | | | | | | | | |  |
|  | | | | | | | | | | | | 14 |  | CP |  | 1/21/2023 3:01 AM |  |
|  | | | Les événements violents enregistrés la semaine dernière à Bamenda ont laissé apparaître que les instigateurs agissent à visages couverts prêts à sacrifier sans ménagement une année scolaire. Le 8 décembre dernier, les mouvements d’humeur qui secouent les villes de Buea et de Bamenda ont atteint un pic dans cette dernière localité avec des actes qui continuent d’être dénoncés. Les manifestations observées depuis quelques semaines semblent remettre au goût du jour une actualité vécue dans notre pays au début des années 1990. Une horde de manifestants qui descendent dans la rue, alors même que leurs commanditaires continuent de tirer les ficelles dans l’ombre. Ceci dans le but de déstabiliser les institutions de la République. | | | | | | | | | | | | | |  |
|  | | |  | | | | | | | | | | | | | |  |
|  | | | | | | | | | | | | 15 |  | CP |  | 1/21/2023 3:03 AM |  |
|  | | | Le parti politique a tenu une conférence de presse mercredi à Douala sur la situation dans les régions du NordOuest et Sud-Ouest. «Le Manidem est scandalisé par l’acte qui consiste à brûler le drapeau de notre pays et considère que cette action délibérée des activistes de la division du pays est une véritable injure au sacrifice suprême consenti par les patriotes des deux bords pour l’unité du pays et au peuple kamerunais, qui dans son écrasante majorité, rejette la partition du Kamerun. » Cette position du Mouvement africain pour la nouvelle Indépendance et la Démocratie (Manidem) a été partagée avec les médias ce 14 décembre 2016, lors d’une conférence de presse à son siège de Douala. Une rencontre qui portait sur la situation actuelle dans les régions du Nord-Ouest et Sud-Ouest. Il était question pour ce parti politique de donner ses propositions sur la sortie de crise. Ainsi donc, le Manidem « exige la mise sur pied rapide d’une commission d’enquête indépendante qui doit en même temps faire la lumière sur les violences des forces de l’ordre et leurs commanditaires, mais également trouver les auteurs et les commanditaires de l’attaque incendiaire | | | | | | | | | | | | | |  |
|  | | |  |
|  | | |  | | | | | | | | | | | | | |  |
|  | | | | | | | | | | | | 16 |  | CP |  | 1/21/2023 3:39 AM |  |
|  | | | A few tabloids had predicted a showdown between government representatives and those of the English-speaking teachers’ trade unions before the two sides began their meeting in Bamenda last Tuesday. Everything seemed to have countered that feeling until what can be considered a detail came to spoil the soup as it were. The strenuous effort to bring together four members of government and representatives of the teachers under one roof for a fruitful discussion suddenly became complicated when some of the trade unionists put up a new conditionality: participation of their colleagues from the South-West, release of “kidnapped and detained children” following the recent violence in Bamenda. | | | | | | | | | | | | | |  |
|  | | |  | | | | | | | | | | | | | |  |
| Reports\\Coding Summary By Source Report | | | | | | | | | | | Page 45 of 146 | | | | | | |
| 1/21/2023 3:45 PM | | | | | | | | | | | | | | | | | |
|  | | | **Classification** |  | **Aggregate** |  | **Coverage** |  | **Number Of Coding References** |  | | **Reference Number** |  | **Coded By Initials** |  | **Modified On** |  |
|  | | | | | | | | | | | | | | | | | |
|  | | | | | | | | | | | | 17 |  | CP |  | 1/21/2023 3:43 AM |  |
|  | | | Face à l’intransigeance observée chez les représentants des syndicats, des associations ont été interdites hier. Ainsi donc, les travaux du Comité interministériel ad hoc chargé d’examiner et de proposer des solutions aux préoccupations soulevées par les syndicats des enseignants anglophones sont achevés, comme l’indique le communiqué de presse rendu public avant-hier par son président, le Pr. Ghogomu Paul Mingo. Même si ce dernier rappelle la « détermination du gouvernement à poursuivre le dialogue sur les questions relatives à l’amélioration du système éducatif camerounais (sous-systèmes anglophone et francophone), ceci dans le cadre de l’instance statutaire créée à cet effet par le Premier ministre le 8 novembre 2016. Pour l’ensemble de l’opinion camerounaise, l’heure est aujourd’hui au respect des différents engagements des parties pour permettre une reprise sereine des classes dans ces deux régions. Les cours ici ayant été interrompus depuis la fin du mois de novembre 2016. L’on peut déjà signaler ici que le gouvernement n’a pas attendu la fin des travaux, survenue tard dans la nuit de vendredi à samedi dernier pour commencer à lâcher du lest. L’on peut signaler l’annonce du recrutement spécial de 1 000 enseignants bilingues, l’intégration | | | | | | | | | | | | | |  |
|  | | |  |
|  | | |  | | | | | | | | | | | | | |  |
|  | | | | | | | | | | | | 18 |  | CP |  | 1/21/2023 3:48 AM |  |
|  | | | Schools are expected to begin full-fledged today in the Region following a fiery elite forum in Buea last Thursday A meeting convened by Senator Peter Mafany Musonge, CPDM political leader for the South West Region, Senator and Grand Chancellor of National Orders, 2 February, 2017, has resolved to steer clear from what they termed “separatists and two-state federalists”. Invited to attend the forum, held in the premises of Mountain Hotel Buea, were the cream of the Region including MPs, Mayors, traditional rulers, political leaders, trade unions, vocational and civil society organisations, elite ranking from Director level, the South West Teachers’ Association, South West lawyers and members of government from the area. The meeting, witnessed by the South West Governor, Bernard Okalia Bilai, acknowledged the efforts | | | | | | | | | | | | | |  |
|  | | |  |
|  | | |  | | | | | | | | | | | | | |  |
|  | | | | | | | | | | | | 19 |  | CP |  | 1/21/2023 3:49 AM |  |
|  | | | Le président du Comité ad hoc chargé de proposer des solutions aux problèmes des syndicats anglophones, le Pr. Ghogomu Paul Mingo, était face à la presse lundi à Yaoundé. A l’issue de ces échanges, l’on retient que l’instance créée par le Premier ministre, chef du gouvernement, le 26 novembre 2016, s’est profondément penchée sur ses missions. En effet, né au plus fort de la grève lancée le 21 novembre 2016 par les enseignants du sous-système anglophone, ce comité a engagé un dialogue franc avec les responsables des syndicats. Ce qui a abouti à la levée du mot d’ordre de grève le vendredi 4 février dernier. Ce dénouement peut s’expliquer par des actions vigoureuses déjà prises par le chef de l’Etat, pour résoudre les problèmes posés par ces syndicats | | | | | | | | | | | | | |  |
|  | | |  | | | | | | | | | | | | | |  |
|  | | | | | | | | | | | | 20 |  | CP |  | 1/21/2023 4:09 AM |  |
|  | | | Administrative, traditional and religious authorities are on their heels to discourage manifestations over the weekend. The South West Region has been put on guard against secessionists threats announced on social media for October 1 in Anglophone Cameroon. The situation is even more worrisome owing to last September 22, 2017 protest marches staged with surgical success in the Regional capital, Buea, and numerous other major centres of the Region. To assuage possible escalations proactively, Governor Bernard Okalia Bilai has dished out messages of peace and safeguard to all citizens of good faith, good morals and non-violence, to protect their children from joining any attempts at violence this weekend. From 30th September to October 2, public manifestations are forbidden. “Let youngsters stay at home or at school where they are supposed to be”, Okalia Bilai has said. Elsewhere | | | | | | | | | | | | | |  |
|  | | |  |
|  | | |  | | | | | | | | | | | | | |  |
|  | | | | | | | | | | | | 21 |  | CP |  | 1/21/2023 4:16 AM |  |
|  | | | “Here is an introductory statement of Communication Minister, Issa Tchiroma Bakary during October 24, 2017 press conference in Yaounde. Distinguished Journalists, Ladies and Gentlemen, I am highly delighted and honored to wish you a warm welcome to this meeting to which I have invited you for us to dwell on the latest report of the "International Crisis Group", on the crisis prevailing in the North-West and South-West Regions. As you may have noticed, the International Crisis Group has, in the space of just two months, published two reports condemning the Cameroonian Government, on the situation I have just mentioned. The most recent of these two reports, dated October 19, 2017, contains ungrounded allegations of such gravity that the Government could not remain speechless in the face of such vexing aggression. The Government therefore strongly refutes all these allegations and totally rejects both the report of the International Crisis Group of 2nd August 2017 and that published on 19 October | | | | | | | | | | | | | |  |
|  | | |  |
|  | | |  | | | | | | | | | | | | | |  |
|  | | | | | | | | | | | | 22 |  | CP |  | 1/21/2023 4:17 AM |  |
|  | | | Avec la crise socio-politique qui secoue, depuis un certain temps, les régions du Nord- Ouest et du Sud-Ouest, le rôle de la presse fait à nouveau débat. Attiser les tensions ou apaiser les esprits : quelle doit être sa mission première ? Que doit-on attendre d’elle dans un contexte de crise quasi insurrectionnelle où des voix s’élèvent pour appeler à plus de… responsabilité ? Le questionnement occupe voire préoccupe les cercles des observateurs avertis de la pratique journalistique, en temps de crise. Ce questionnement n’est pas nouveau. Loin s’en faut ! A la vérité, il est consubstantiel aux situations de crise. Ici comme ailleurs, il fait l’objet de vifs échanges, chaque fois qu’un pays est confronté à des tensions sociopolitiques susceptibles de destructurer le tissu social. Enregistré au cours du dernier quart de siècle, le cas du Rwanda, pays africain frère, hante encore la mémoire collective. Tristement célèbre est restée la « Radio des Mille Collines » dont le rôle incitateur avait conduit en 1994, à un véritable génocide. Près d’un million de morts déclarés en l’espace de quatre mois ! Autour de nous, les exemples sont légion, qui peuvent illustrer « les dangers d’une presse sans foi ni loi » dans un contexte de crise à l’instar de celle que traverse notre pays. Prévenir valant mieux que guérir, le Ministre | | | | | | | | | | | | | |  |
|  | | |  |
|  | | |  | | | | | | | | | | | | | |  |
| Reports\\Coding Summary By Source Report | | | | | | | | | | | Page 46 of 146 | | | | | | |
| 1/21/2023 3:45 PM | | | | | | | | | | | | | | | | | |
|  | | | **Classification** |  | **Aggregate** |  | **Coverage** |  | **Number Of Coding References** |  | | **Reference Number** |  | **Coded By Initials** |  | **Modified On** |  |
|  | | | | | | | | | | | | | | | | | |
|  | | | | | | | | | | | | 23 |  | CP |  | 1/21/2023 4:27 AM |  |
|  | | | They made the decision on Saturday July 13, 2019, at the premises of the Sub Divisional Office in Kumba III. Some 7,000 commercial motor riders in Kumba have vowed that there will be no more ghost town in Kumba on Mondays as proclaimed and enforced by the separatist groups in the North West and South West Regions. The motorbike riders stormed the streets of the city of Kumba, headquarters of Meme Division, on Saturday morning (13 July, 2019) protesting against the killing of one of theirs by suspected separatists fighters in Fiango (Kumba II SubDivision). They decried that over 200 commercial motorbikes had been seized by members of suspected separatist groups in the town without any reaction from the riders. According to one of the riders, Ngu Thomas, who spoke to C.T., suspected members of the group on Friday July 12, at about 9pm stopped one of the riders whose only nick name we got as “Fashion” and asked him to hand his bike to them. The 19-year-old Fashion refused. As he was struggling with them, one of the armed men pulled out a locally fabricated gun | | | | | | | | | | | | | |  |
|  | | |  |
|  | | |  | | | | | | | | | | | | | |  |
|  | | | | | | | | | | | | 24 |  | CP |  | 1/21/2023 4:35 AM |  |
|  | | | 5th Joint Military and Gendarmerie Commanders size up operation, congratulates soldiers for dislodging armed fighters from Saddle Hill touristic base in Bafut subdivision. The Commanders of the 5th Joint Military and Gendarmerie Region, Brigadier Generals, Nka Valerie and Ekongwesse Divine on May 1st, 2020 went cheering Defence and Security Forces in Bafut who dislodged armed fighters who had turned the Saddle Hill touristic facility into a base from where they launched attacks and kidnapped citizens in the neighbourhoods of Mezam Division. The six -day field operation led by Col. Matian Charles Alain covered the Bafut neighbourhoods of Manka Nikong, Nsani, Agyati, Mankwi etc. In all, the 5th Joint Military and Gendarmerie Commanders were presented arms and amunition, motorcycles, a Fortuna Toyota SUV car, two horses. It emerged from the operation's team leader Col. Matian Charles Alain that some 15 armed fighters were neutralized. | | | | | | | | | | | | | |  |
|  | | |  |
|  | | |  | | | | | | | | | | | | | |  |
|  | | | | | | | | | | | | 25 |  | CP |  | 1/21/2023 4:36 AM |  |
|  | | | A special operation by the 5th Joint Military and Gendarmerie Region, neutralise alleged armed fighters, recovers killer weapons in Boyo division. It took the "Boyo I special operation” six days with Col. Matiang Charles Alain leading some 450 elements of the defense and security forces. The Commanders of the 5th Joint Military and Gendarmerie Region, Brigadier General Nka Valere and Ekongwesse Divine went sizing up the operation in Fundong, capital of Boyo division on August 30,2020. It emerged from the visit that some 17 alleged separatist fighters were neutralised, seven others captured alive and several alleged enemy camps were destroyed. The operation took the forces to the neighbourhoods of Abuh, Anyajua, Aboh, Elemighong, Mbueni, Ngwah, and Asuh. Col. Matiang Charles Alain told the visiting Generals that the operation recovered from the enemy camps, some dangerous weapons like guns and gas cylinders. Among the lot recovered were also motorcycles, phones, sewing machines and combat outfits used by the fighters. On-the-spot, Brigadier Generals Nka Valere and Ekongwesse Divine hailed the forces who braved the difficult terrain of Boyo for a mission that was conceived | | | | | | | | | | | | | |  |
|  | | |  |
|  | | |  | | | | | | | | | | | | | |  |
|  | | | **Nodes\\Economic Consequence** | | | | | | | | | | | | | |  |
|  |  | No |  | 0.0116 |  | 10 |  | | | | | | |
|  | | |  |  |  |  |  |  |  |  | | | | | | | |
|  | | | | | | | | | | | | 1 |  | CP |  | 1/21/2023 1:06 AM |  |
|  | | | Fears of alleged strike action by transporters slowed the economy but some vendors came out. Bamenda was slow to awake yesterday Monday, December 5, 2016. The population was gripped by the fear of weekend’s alleged strike action calling on transporters, taxi drivers and commercial motorcycle riders not to go out for work. That is perhaps, why some shops remained shot while very few taxis and commercial motorcycles circulated in town. | | | | | | | | | | | | | |  |
|  | | |  | | | | | | | | | | | | | |  |
|  | | | | | | | | | | | | 2 |  | CP |  | 1/21/2023 1:13 AM |  |
|  | | | Forces of Law and Order push back rioting youths from the streets, protesting ugly state of roads, poor work by Chinese company rehabilitating 40-year-old water system. Generalized trekking has been in vogue with very few commercial motorcycles available for service following Monday, November 21 2016 violent protests by some youths who erected barricades on the streets of Bamenda, burnt tires, slowed economic activities and seriously threatened social peace. Inhabitants are still at a loss about the situation which started with some youths who assembled in the neigbourhood of City Chemist Roundabout before proceeding to criss-cross the streets, expressing frustrations about the ugly state of roads in the city. Their first stop over was the Bamenda City Council premises where they destroyed the gate | | | | | | | | | | | | | |  |
|  | | |  |
|  | | |  | | | | | | | | | | | | | |  |
|  | | | | | | | | | | | | 3 |  | CP |  | 1/21/2023 1:14 AM |  |
|  | | | The incident caused the South West Chief Executive to go to Limbe. Though without loss of human life, at least 50 shops containing fowls, spices, palm oil, egusi, and much other food stuff have been razed to ashes in the night of Thursday breaking Friday (30-31 March) in the central Limbe Old Market. It was the second consecutive day Limbe was suffering from market arson as the neighbouring Limbe New Market had lost some four shops a night before to flames. The incident, as grievous as it was, caused the South West Governor, Bernard Okalia Bilai, to mobilise to the Limbe Market Friday afternoon especially as the suspect, through the help of the Limbe Council Vigilante group, had been caught and detained in the Limbe Central Police Station. Sources say the suspect was caught with fire-lighters and petrol at about 3 am Friday as he lit the last shops. The Limbe fire-fighting Brigade could only save the situation from escalating beyond the 50 shops burnt | | | | | | | | | | | | | |  |
|  | | |  |
|  | | |  | | | | | | | | | | | | | |  |
| Reports\\Coding Summary By Source Report | | | | | | | | | | | Page 47 of 146 | | | | | | |
| 1/21/2023 3:45 PM | | | | | | | | | | | | | | | | | |
|  | | | **Classification** |  | **Aggregate** |  | **Coverage** |  | **Number Of Coding References** |  | | **Reference Number** |  | **Coded By Initials** |  | **Modified On** |  |
|  | | | | | | | | | | | | | | | | | |
|  | | | | | | | | | | | | 4 |  | CP |  | 1/21/2023 2:05 AM |  |
|  | | | The Mayor under the supervision of the regional Governor ensured that all business premises were opened yesterday and denizens went about their activities unperturbed. As of yesterday, September 4, 2019, denizens of Buea went about their daily activities unperturbed and businesses were booming in the town. This follows Buea Council resolve to see that no institution is shut down in the municipality in the face of what many now call lockdown in the North West and South West Regions. Beginning from 9 am, Mayor Ekema Patrick Esunge led the Buea Council staff through the streets of Buea Town, Bokwango, Clerk Quarters, Great Soppo, Molyko and the Mile 17 Bus Station where they ensured that all business premises were opened and operational. The activities were supervised by South West Governor, Bernard Okalia Bilai and the region’s top administrators. Ekema Patrick explained to the press that while secessionists who are in the forest are preaching lockdown, they municipal officials who lived in their houses in the city are | | | | | | | | | | | | | |  |
|  | | |  |
|  | | |  | | | | | | | | | | | | | |  |
|  | | | | | | | | | | | | 5 |  | CP |  | 1/21/2023 2:14 AM |  |
|  | | | The South West regional chief town of Buea is alive since January 18, 2017 following two days of grounded activities resulting from the ghost town operations. News of Cameroon’s 2-1 win over Guinea Bissau, Wednesday, January 18, 2017 night sweetened the minds of the people. Inhabitants of the key towns of the South West Region awoke to normal activities across the region. From Menji in Lebialem to Kumba in Meme, passing through Bangem in Kupe-Muanenguba, Mamfe in Manyu, Mundemba in Ndian and Limbe in Fako these divisional headquarters echoes harmony, hustle and bustle since Wednesday. Some agitation earlier noted in neighouring towns of Buea such as Muyuka, Ekona and Mutengene were quickly quelled. At Ekona, a group of youngsters playing football near the main road engaged in a standoff with the forces of law and order after their ball was crushed by a passing vehicle. Travellers | | | | | | | | | | | | | |  |
|  | | |  |
|  | | |  | | | | | | | | | | | | | |  |
|  | | | | | | | | | | | | 6 |  | CP |  | 1/21/2023 2:16 AM |  |
|  | | | Confrontation between forces of law and order and population on Thursday morning froze activities in some parts of the town. Bamenda woke up on January 18, 2017 to see its streets as busy as a beehive following the ghost town operations of the two previous days. But on Thursday, January 19, 2017 activities were grounded in some parts of the town due to confrontation between the forces of law and other and the population. This was caused by the arrest of some youths at Ntamulung neighbourhood of Bamenda. When the population got news of the arrest of the young men, they went wild and mounted barricades thus pushing the forces of law and order to react with tear gas and water cannons. This grounded activities in some parts of the town like the main commercial streets, Ntarinkon amongst others. It is also worth mentioning that since Tuesday evening there is no Internet connection, thus making it difficult for banks and money transfer companies to operate. This has made life difficult as journalists are finding it difficult to file reports to their various newsrooms. At press time some | | | | | | | | | | | | | |  |
|  | | |  |
|  | | |  | | | | | | | | | | | | | |  |
|  | | | | | | | | | | | | 7 |  | CP |  | 1/21/2023 2:19 AM |  |
|  | | | The Divisional Officer and Mayor for Buea made an inspection outing yesterday to ascertain business resumption in the Regional headquarters. Deputy Mayor Mossoko later confirmed that the Buea Town market where the Divisional Officer, Wokam Paul and Mayor Ekema Patrick threatened to seal shops that were locked, was about half opened by mid day yesterday. The Mayor has promised to visit other commercial centres like Mile 17 and the Clerks quarters today with the same action. Although still timid, a few more pupils and students were seen in some campuses of Buea city yesterday. In the campus of the Bilingual Grammar School Molyko, Buea Town and Bokwaongo, dozens of pupils and students were seen playing in the school yards, many of them in assorted clothes. They were approached and they confirmed they were students. | | | | | | | | | | | | | |  |
|  | | |  |
|  | | |  | | | | | | | | | | | | | |  |
|  | | | | | | | | | | | | 8 |  | CP |  | 1/21/2023 2:46 AM |  |
|  | | | The weekend featured more commercial activities with reassuring Security Forces around. Unlike recent weeks, Bamenda was busier over the weekend with life virtually returned to the city. The weekend featured more taxis and more Commercial motorcycles on the streets, especially at Commercial Avenue. Most shops that were shot reopened for customers on Saturday December 10, 2016. Motor parks and inter-urban transport Agencies were busy receiving and dispatching some passengers returning from the plantations in the South West region to spend end-of-year feasts with family members in their respective divisions. The rush for food items at the City’s markets was evident. On most lips were prayers for things to completely return to normal. Meanwhile, security forces are prominent at most of the City’s junctions, poised to intervene in their mission to protect people and property and give peace a chance in times like this. Their dissuasive presence also frightens some inhabitants who prefer to stay back | | | | | | | | | | | | | |  |
|  | | |  |
|  | | |  | | | | | | | | | | | | | |  |
|  | | | | | | | | | | | | 9 |  | CP |  | 1/21/2023 3:03 AM |  |
|  | | | The town was over the weekend rippled with normalcy and expectations. As Teachers’ syndicates, parents and officials of Education prepare to meet for dialogue in the days ahead, ghost schools and courts remained innate while the South West capital City of Buea visibly went about ordinary life as usual yesterday. Affluence was observed along the main street dissecting the city of Buea from Mile 17 to Buea-Town. Shops, markets, restaurants, road-side provision stores, beer parlours and off-licenses continued their daily activities. Taxis circulated the length and breadth of Buea as commuters moved freely without any hindrance. Excepting the traffic Police known to assist at the main road junctions, no men in uniforms were observed as in the past along the streets. | | | | | | | | | | | | | |  |
|  | | |  | | | | | | | | | | | | | |  |
|  | | | | | | | | | | | | | | | | | |
| Reports\\Coding Summary By Source Report | | | | | | | | | | | Page 48 of 146 | | | | | | |
| 1/21/2023 3:45 PM | | | | | | | | | | | | | | | | | |
|  | | | **Classification** |  | **Aggregate** |  | **Coverage** |  | **Number Of Coding References** |  | | **Reference Number** |  | **Coded By Initials** |  | **Modified On** |  |
|  | | | | | | | | | | | | | | | | | |
|  | | | | | | | | | | | | 10 |  | CP |  | 1/21/2023 4:28 AM |  |
|  | | | An Agreement has been signed with some 18 North West and South West based civil society organisations for infrastructure and livelihood development. A quick return to normalcy in the North West and South West regions preoccupies the United Nations Development Programme, UNDP, whose small grants initiative to help matters inspires hope for many, suffering the consequences of the socio-political and security crisis rocking the regions. In effect, the UNDP has signed MOUs with some 18 North West and South West-based Civil Society Organisations to promote early economic recovery and social cohesion, support infrastructure and livelihood recovery in the affected regions. All beneficiary CSOs have received FCFA 180 million to fund projects that address livelihood issues, but also community dialogue, economic recovery and social cohesion through sports. The MOU event on 31st July, 2019 stressed the need for contributions to the wider effort of the Cameroon government and UN Agencies in Cameroon to promote social cohesion, reduce vulnerability and assist efforts in the North West and South West. It was against this backdrop, that the Resident Representative of the UNDP, Jean Luc Stalon said his organization’s strategic support to Cameroon's development agenda for 2018-2020 is based on UN development assistance framework. It is all about support that | | | | | | | | | | | | | |  |
|  | | |  |
|  | | |  | | | | | | | | | | | | | |  |
|  | | | **Nodes\\Effects** | | | | | | | | | | | | | |  |
|  |  | No |  | 0.0452 |  | 39 |  | | | | | | |
|  | | |  |  |  |  |  |  |  |  | | | | | | | |
|  | | | | | | | | | | | | 1 |  | CP |  | 1/21/2023 1:03 AM |  |
|  | | | Ministers of Secondary and Basic Education plea for parents to send children to school fell on deaf ears. The streets of Bamenda were dry and void of people yesterday Monday January 9, 2017 expected date for the resumption of the second term of the 2016-2017 academic year. Be it at Bamenda I, II or III the school no students were found in the schools CT visited. On the streets one could hardly fine motorbikes, taxis or even private vehicles, markets were open but with no traders, all commercial activities were grounded | | | | | | | | | | | | | |  |
|  | | |  | | | | | | | | | | | | | |  |
|  | | | | | | | | | | | | 2 |  | CP |  | 1/21/2023 1:03 AM |  |
|  | | | The following is a press release from the Minister of Higher Education: “In keeping with the Highest Orientations contained in the address of the President of the Republic, Head of State on the 31 December 2016, in direct relation to the press release of the Prime Minister, Head of Government on the 5 January 2017, the Minister of Higher Education, President of the Inter-Ministerial Committee in charge of examining and proposing solutions to grievances raised by Teachers’ Trade unions, recalls that the 4 Ordinary session of the said instance will meet at the end of the Month of January 2017. Like | | | | | | | | | | | | | |  |
|  | | |  | | | | | | | | | | | | | |  |
|  | | | | | | | | | | | | 3 |  | CP |  | 1/21/2023 1:04 AM |  |
|  | | | Governor, AdolpheLeleLafrique on the field to reassure inhabitants of measures for life without stress in the City and neigbourhoods In the backdrop of uneasy calm, taxis, commercial motorcycles and interurban transport buses are back on the streets of Bamenda after the disorder that paralyzed economic activities on November 21 and 22 , 2016. Banks and shops whose doors were shot during the disorder are equally back to life with inhabitants going about their activities after days of stress during which trekking was in vogue with taxis, commercial motorcycles and interurban transport agencies off the streets. Violent outburst by some youths who erected | | | | | | | | | | | | | |  |
|  | | |  | | | | | | | | | | | | | |  |
|  | | | | | | | | | | | | 4 |  | CP |  | 1/21/2023 1:15 AM |  |
|  | | | Consortium of Parents with children in some mission academic schools claim FCFA 150 billion from respective officials accused for refusing to teach their children. Anew development has emerged in the anglophone crisis with some church leaders and college principals summoned to appear before the Bamenda and Buea courts of 1st instance on April 21st, 2017. The direct summons at the request of a certain consortium of parents whose children are in some mission academic institutions want the Catholic Archbishop of Bamenda His Grace Cornelius Fontem Esua along with the president of the provincial Episcopal conference His Lordship George Nkuo, the principals of Sacred Heart college, St Bedes college and our Lady of Lourds college, the Executive President of the Cameroon Baptist Convention (CBC) Rev. Ncham Godwill and the Moderator of the PCC to answer charges which include.; failure | | | | | | | | | | | | | |  |
|  | | |  |
|  | | |  | | | | | | | | | | | | | |  |
|  | | | | | | | | | | | | 5 |  | CP |  | 1/21/2023 1:20 AM |  |
|  | | | Day one of the 2017/2018 academic year started in Bamenda with few pupils and students showing up in special circumstances that featured stepped up security. Resumption of schools for the 2017/2018 academic year on September 4, 2017 showcased different phases in the North West region. Teaching and learning in examination classes resumed two weeks earlier in virtually all the Presbyterian Secondary Colleges in Bamenda and neighbourhoods. Meanwhile, Sacred Heart college and Our Lady of Lourdes College, Mankon started receiving students into hostels yesterday, 4th September. Elsewhere, Ecole De Champion primary and Nursery school in the neighbourhood of Up Station, Bamenda I Sub Division enrolled 70 of the expected 350 pupils on day one. | | | | | | | | | | | | | |  |
|  | | |  | | | | | | | | | | | | | |  |
|  | | | | | | | | | | | | | | | | | |
| Reports\\Coding Summary By Source Report | | | | | | | | | | | Page 49 of 146 | | | | | | |
| 1/21/2023 3:45 PM | | | | | | | | | | | | | | | | | |
|  | | | **Classification** |  | **Aggregate** |  | **Coverage** |  | **Number Of Coding References** |  | | **Reference Number** |  | **Coded By Initials** |  | **Modified On** |  |
|  | | | | | | | | | | | | | | | | | |
|  | | | | | | | | | | | | 6 |  | CP |  | 1/21/2023 1:23 AM |  |
|  | | | The Anglophone crisis has resulted in mass exodus of children to Francophone regions. Though schools are gradually going on in the Anglophone regions, the fear that they might be interrupted any time has pushed parents residing in Douala to retrieve their kids from schools in the Anglophone regions while some parents residing in the North West and South West regions have sought refuge for their kids in relations in Francophone regions. The situation has made good business for schools in the Francophone regions while those in the Anglophone regions are left to the mercy of God. In Douala, most primary and secondary schools in Bonaberi (neighbourhood where most Anglophones reside) are jammed to capacity. Private and mission schools have taken advantage of the situation to enrol more pupils and students leading to overcrowding in classrooms | | | | | | | | | | | | | |  |
|  | | |  |
|  | | |  | | | | | | | | | | | | | |  |
|  | | | | | | | | | | | | 7 |  | CP |  | 1/21/2023 1:23 AM |  |
|  | | | Two weeks have gone past since the 2017/2018 Academic Year flung open its doors. In the three troublesome regions of the North West, South West and Far North, the dust of uncertainty is yet to completely settle. The atmosphere continues to be charged with fear; fear of the unknown. This state of affairs is, of course, not abnormal considering the pre-school crises that rocked the three regions. The situation in the Far North Region dates back to about 2014 with the resurgence of the Boko Haran insurgence. The escalation of attacks resulted in the closure of schools, some schools hosting internally displaced students, destruction of school infrastructure, barriers to school enrolment and fleeing of education personnel among others. The situation was different as concerns the North West and South West Regions. | | | | | | | | | | | | | |  |
|  | | |  |
|  | | |  | | | | | | | | | | | | | |  |
|  | | | | | | | | | | | | 8 |  | CP |  | 1/21/2023 1:24 AM |  |
|  | | | The Administration is sparing no effort to enable safe learning and teaching in schools. Following a coordinating meeting summoned early August by the South West Governor, Bernard Okalia Bilai, boarding schools in particular as well as all schools were assured of State protection against attacks and calls for school boycott by invisible persons. Two weeks into the 2017-2018 academic year, calm and serenity are evident in the various Divisional headquarters of the six administrative zones (Divisions) of the Region. With no major incident reported so far, special surveillance is being mounted around boarding schools of the Catholic, Presbyterian, Baptist, and Lay Private ownership. Day schools, both public and private, are also under scrutiny against any attempts of intimidation, harm and destruction | | | | | | | | | | | | | |  |
|  | | |  |
|  | | |  | | | | | | | | | | | | | |  |
|  | | | | | | | | | | | | 9 |  | CP |  | 1/21/2023 1:28 AM |  |
|  | | | Governor Bernard Okalia promised special security measures for dormitory schools. Authorities of the South West Region are on their heels organizing holiday classes and drumming school return come next month. Senior Divisional Officers, Mayors, Heads of the Forces of Law and Order, Education Delegates, Education Secretaries and School Principals of the South West Region are, each in their spheres, combing their areas to animate school re-opening come September 4. They met last 2 August in Buea, Regional headquarters, convened by the Regional Governor, Bernard Okalia Bilai, to weave strategies for schools resumption on 4 September, 2017. It was resolved at the important meeting held in the Governor’s conference room in Buea that all living forces in the Region should put hands on deck so that | | | | | | | | | | | | | |  |
|  | | |  | | | | | | | | | | | | | |  |
|  | | | | | | | | | | | | 10 |  | CP |  | 1/21/2023 1:29 AM |  |
|  | | | Governor Adolphe Lele Lafrique prescribes best practices for effective resumption of schools at Regional Administrative, security forum. The persistent Anglophone crisis is not helping matters in efforts to ensure the effective resumption of schools for the 2017/2018 academic year in the North West and it is against this backdrop that Governor, Adolphe Lele Lafrique has told education stake holders that posterity will judge them and children will hold them responsible if they fail to act responsibly in times like this. The event was the Regional administrative and security coordination meeting in Mbengwi, Momo Division on August 9th, 2017 where the governor; hailed religious and traditional leaders, elite and all stakeholders working to stabilize things for normalcy to give education and development a chance in the region. | | | | | | | | | | | | | |  |
|  | | |  |
|  | | |  | | | | | | | | | | | | | |  |
|  | | | | | | | | | | | | 11 |  | CP |  | 1/21/2023 1:45 AM |  |
|  | | | Parents and Forces of Law and Order were determined to ward off any threats. Some 11.846 candidates who registered for the 2018 Common Entrance Examination in the South West Region have sat for the exam in 98 centres across the Region. Equally, the “Entrée en Sixième”, Francophone equivalent of the Anglophone Common Entrance was also being written in the region. For security reasons, the number of centres was technically down-scaled from over two hundred as was in the previous years. The Regional Delegate for Basic Education, Mrs Motaze Dorothy Atabong, set out to Limbe where she supervised the writing of this year’s Common Entrance. In Buea, seat of the Regional Administration, the Divisional Officer, Kouam Wokam Paul, made impromptu visits to the existing four exam centres in the vicinity to ascertain the security of the pupilcandidates. On the field, the D O | | | | | | | | | | | | | |  |
|  | | |  |
|  | | |  | | | | | | | | | | | | | |  |
|  | | | | | | | | | | | | 12 |  | CP |  | 1/21/2023 1:50 AM |  |
|  | | | 19 workers faced the Regional Disciplinary Board recently to defend selves against accusations of undue absences and abandonment of duty posts. An in-camera session of the Regional Disciplinary Board dropped curtains in Bamenda on November 15, 2018 with the suspension of salaries of some 15 civil servants and state workers. The session equally featured warnings for some four workers in the lump sum of a total 19 that were summoned to defend themselves in cases of undue absences and abandonment of duty posts. It emerged from the Board that the files concerned with suspended salaries have been forwarded to the Permanent Disciplinary Council in Yaounde. The Permanent Secretary at the Governor’s office, Lanyuy Harry presided at the Jury which came face to face with four of those summoned for hearing. | | | | | | | | | | | | | |  |
|  | | |  |
|  | | |  | | | | | | | | | | | | | |  |
| Reports\\Coding Summary By Source Report | | | | | | | | | | | Page 50 of 146 | | | | | | |
| 1/21/2023 3:45 PM | | | | | | | | | | | | | | | | | |
|  | | | **Classification** |  | **Aggregate** |  | **Coverage** |  | **Number Of Coding References** |  | | **Reference Number** |  | **Coded By Initials** |  | **Modified On** |  |
|  | | | | | | | | | | | | | | | | | |
|  | | | | | | | | | | | | 13 |  | CP |  | 1/21/2023 1:57 AM |  |
|  | | | Another school year has started and unfortunately the old demons of confusion are equally present. Pupils and students across the national territory will as from today 2 September 2019 meet their mates afters over three months of holidays during which they had time to commune with their parents, siblings, and friends. Some might have even taken off the time to learn a trade or something else that can be useful to them as they journey along the uncertain road to success. Sadly, this is proving difficult for some especially in the South West and North West Regions because of separatist calls for school boycott. In the past years the issue was most damaging in the Far North due to the Boko Haram activities incursions. Today, the situation in the two Anglophone regions is even more pathetic. While the disruption of schools in both localities by the strike actions of lawyers and teachers which started in 2016 degenerated into a political and eventually armed conflict, the youth have been treacherously caught | | | | | | | | | | | | | |  |
|  | | |  |
|  | | |  | | | | | | | | | | | | | |  |
|  | | | | | | | | | | | | 14 |  | CP |  | 1/21/2023 2:04 AM |  |
|  | | | Some 1000 pupils and students were on roll in day one of the 2019/2020 academic year in the North West admits ghost town and threats of schools boycott. Day one of school' resumption for the 2019/2020 academic year had little to show with few pupils, students and administrative staff braving threats to file out for the learning and teaching process in the North West Region. Prolonged ghost towns and lockdowns of the region's towns and villages did not help matters with those thirsty for education scared of threats from proponents of schools boycott following the socio, political and security crisis rocking the region. The Regional Delegate of Basic Education, Wambeng Wilfred Ndong is hopeful about improved enrolment statistics in the weeks ahead. He told Cameroon Tribune (CT) that day one of | | | | | | | | | | | | | |  |
|  | | |  |
|  | | |  | | | | | | | | | | | | | |  |
|  | | | | | | | | | | | | 15 |  | CP |  | 1/21/2023 2:04 AM |  |
|  | | | Given that yesterday was the first day in school, Governor Okalia Bilai expressed satisfaction at the attendance and hoped the turnout will increase. Some pupils and students in the South West Region yesterday, Monday September 2, 2019, joined their peers nationwide to begin classes for the academic year 2019/2020. At Government Nursery and Primary School Man’O War Bay in Limbe III Municipality, songs of learning welcomed the South West Governor, Bernard Okalia Bilai and education family accompanying him. The Governor also supervised teaching and learning at Government Technical College Bimbia, SONARA Nursery and Primary School: and College, Presbyterian Girls Secondary School Limbe, Regina Pacis College Muntenge, Baptist High School Buea and Presbyterian Comprehensive Secondary School Buea. At each of the schools visited, Bernard | | | | | | | | | | | | | |  |
|  | | |  |
|  | | |  | | | | | | | | | | | | | |  |
|  | | | | | | | | | | | | 16 |  | CP |  | 1/21/2023 2:04 AM |  |
|  | | | More pupils and students are becoming enthusiastic about returning to school as well as parents and guardians are braving fear. Four days into the 2019-2020 school year, the North West Region is yet to experience that explosive vitality that characterise school campuses before the onset of the socio-political and security crisis. By yesterday enrollment in basic education schools in the region rose to 5,062 from less than 1,000 on day one of school reopening. Basic Education Delegate for the region, Wilfred Wambeng Ndong Kimbung, expresses the need for more enthusiasm in parents to send their children to school. "In Bamenda, there is little enthusiasm; only schools that opened their doors on Monday have remained functional, no other school has reopened," he told CT, noting with regrets that teacher attendance has remained discouraging. He called on teachers to be present on campuses every school day as a away of encouraging parents to send children to school. "Even if pupils have not come let teachers be present," he advised. For secondary schools where there is also some improvement in attendance on the close to 500 students registered on day one, no information is being disclosed at the level of the Regional Delegation in Bamenda, | | | | | | | | | | | | | |  |
|  | | |  |
|  | | |  | | | | | | | | | | | | | |  |
|  | | | | | | | | | | | | 17 |  | CP |  | 1/21/2023 2:08 AM |  |
|  | | | Students, pupils enjoy hitch-free studies in the regional capital, whereas most village campuses are still shut down. Some nursery, primary and secondary schools in the North West regional capital Bamenda have effectively started a crucial Second Term of their annual programme for 2019-2020. The term which enters the week two today in the region is considered crucial and most intense of the academic calendar, whereby teachers, pupils and students are determined to play their respective roles to ensure success at the end of the academic year. Among the schools CT visited beginning with day one which in the region was on January 7, 2020 (instead of January 6, 2020 as it was in other regions of the country) to the end of last week, comprise public and private institutions, many of whose administration spoke to CT on condition of being anonymous both themselves and their institutions. Pupil, student and | | | | | | | | | | | | | |  |
|  | | |  |
|  | | |  | | | | | | | | | | | | | |  |
|  | | | | | | | | | | | | 18 |  | CP |  | 1/21/2023 2:11 AM |  |
|  | | | Au 8e jour du second trimestre, élèves et étudiants attendent toujours de reprendre les classes. La seconde phase des travaux du Comité interministériel ad hoc chargé d’examiner et de proposer des solutions aux préoccupations soulevées par les syndicats d’enseignants anglophones s’est achevée tard dans la nuit de vendredi à samedi avec l’examen de 20 points, contre 11 qui figuraient préalablement au rang des revendications. Le gouvernement avait alors accepté d’élargir le champ des discussions à d’autres points présentés par les syndicats d’enseignants anglophones. Avant l’ouverture des travaux de jeudi dernier, une vingtaine de personnes, interpelées au cours des événements violents du 8 décembre 2016 à Bamenda avaient recouvré la liberté. Des signes qui laissaient présager d’une décrispation de l’atmosphère pour la suite des discussions entre le gouvernement et les syndicats. Un premier indice avait été observé lors des travaux du Comité interministériel ad hoc de la semaine dernière présidé par le Pr. Ghogomu Paul Mingo, par ailleurs, directeur de Cabinet du Premier | | | | | | | | | | | | | |  |
|  | | |  |
|  | | |  | | | | | | | | | | | | | |  |
| Reports\\Coding Summary By Source Report | | | | | | | | | | | Page 51 of 146 | | | | | | |
| 1/21/2023 3:45 PM | | | | | | | | | | | | | | | | | |
|  | | | **Classification** |  | **Aggregate** |  | **Coverage** |  | **Number Of Coding References** |  | | **Reference Number** |  | **Coded By Initials** |  | **Modified On** |  |
|  | | | | | | | | | | | | | | | | | |
|  | | | | | | | | | | | | 19 |  | CP |  | 1/21/2023 2:17 AM |  |
|  | | | Security forces conspicuous to protect people and property in schools that featured teachers and students of the francophone subsystem of education. "A majority of teachers and administrative staff of especially public schools were present on January 23rd, 2017 and a few classes were effective in GBHS Ntamulung and GBHS Bamenda. There were some 60 students present." That is how the North West Regional Delegate for Secondary Education, Victor Mohbakwed sized up the situation in Bamenda yesterday Monday January 23. In effect, the teaching and learning process was not the best on the day scheduled for schools to effectively reopen for the 2nd term of the 2016 /2017 academic year in the North West Region. Most schools remained shut and uniforms were rare to find following the strike action called by Anglophone Teachers Trade Union since November 21, 2016. Forces of law and order were conspicuous | | | | | | | | | | | | | |  |
|  | | |  |
|  | | |  | | | | | | | | | | | | | |  |
|  | | | | | | | | | | | | 20 |  | CP |  | 1/21/2023 2:18 AM |  |
|  | | | Schools resumed timidly in the South West Region yesterday January 23, 2017 following the Ministerial Order of last week countering the ghost school syndrome that had kept pupils and students at home for close to two months. News from the various Divisions spoke of grounded activities especially the lack of taxis in the streets, closed stores and claims of fear of the unknown. In Ndian Divisional Headquarters of Mundemba, tract distributors were arrested by the forces of law and order in the early morning of yesterday. In Lebialem, reports talked of deserted schools though some teachers were present in the campuses. In Kumba, Meme Divisional capital, Mr. Fon Ndikum, the Secretary General at the South West Governor's office, toured the various schools accompanied by the Divisional Etat-major and met mainly the teachers. In the cases of bilingual institutions, francophone students were available for classes. | | | | | | | | | | | | | |  |
|  | | |  |
|  | | |  | | | | | | | | | | | | | |  |
|  | | | | | | | | | | | | 21 |  | CP |  | 1/21/2023 2:20 AM |  |
|  | | | Parents suffer the extra burden of having children of school going age away from school. From the look of things, pupils and students who have not resumed school since the teacher's trade union strike was called are the uninvited guests in many homes in Bamenda and neighbourhoods. On the streets and on the corridors of many homes, it is on most lips that such school children have become an extra burden. Parents are counting the cost with alot to show in inconveniences and extra efforts to keep them at home away from their natural academic environment. Cynthia Ngang, in the neighbourhood of Nkwen is at a loss on what to do with her 15-year-old son J. John, a student of a boarding school in Bamenda. In the absence of academic activities, she finds it difficult holding John back at home without any comprehensive insurance coverage for security in the neighbourhoods. That is the same story for many children who go on playing football | | | | | | | | | | | | | |  |
|  | | |  |
|  | | |  | | | | | | | | | | | | | |  |
|  | | | | | | | | | | | | 22 |  | CP |  | 1/21/2023 2:20 AM |  |
|  | | | Fear continues to dominate English subsystem as fewer students are present in classrooms. Taxis and commercial motorcycles returned to the streets of Bamenda since Wednesday, January 25, 2017 after two days, Monday and Tuesday that witnessed another stressful ghost town experience. Life gradually returned to the city and neighbourhoods that spent January 23rd and 24th with markets and shops shut. Inter-urban transport vehicles once more hit the roads while snack bars, off licences and liquor houses resumed business activities. The situation did not however encourage the resumption of schools for the English subsystem of education in virtually all the schools. The difference continues to be in GBHS Bamendankwe in the neighbourhood of Up-station where timid academic activities took place in the francophone subsystem. On the spot in campus, is the presence of security forces to protect students and property. | | | | | | | | | | | | | |  |
|  | | |  |
|  | | |  | | | | | | | | | | | | | |  |
|  | | | | | | | | | | | | 23 |  | CP |  | 1/21/2023 2:20 AM |  |
|  | | | Activities have returned to normal in Buea after the two days of ghost town early last week. Taxis are back on the streets and businesses are open once more Some students, mostly Francophones, attend school regularly unperturbed. The only irk is the absence of internet which has slowed down business in the South west regional capital. On Saturday night, there was effervescence in the streets of Buea after the Lions victory over Senegal in the quarter finals of the ongoing Africa Cup of Nations in Gabon. People shouted excitedly while some vehicles blasted their horns in sign of jubilation. However, it is not known for how long this good mood will prevail as there are rumours the ghost town strike action will continue today and tomorrow. In preparation to counter the strike action, the Mayor of Buea has bought a consignment of taxis to do transportation in case taxi drivers adhere to the boycott of activities. Last week | | | | | | | | | | | | | |  |
|  | | |  |
|  | | |  | | | | | | | | | | | | | |  |
|  | | | | | | | | | | | | 24 |  | CP |  | 1/21/2023 2:23 AM |  |
|  | | | A total of 2,432 students of the francophone subsystem have received 197 lessons from 1,141 teachers so far in the region. Records about the resumption of schools in the North West Regional Delegation of Secondary Education indicate that out of the 11,533 students expected in some 222 secondary schools, 2,432 are receiving lessons as at January 30, 2017.The Regional Delegate Mombakwed Victor told CT that a majority belong to the francophone subsystem with 197 lessons so far received from 1,411 teachers out of 2,937 expected. Daily control sheets at the Regional Delegation reveal a positive trend for students in the English subsystem with 149 present for classes at GBHS Downtown Bamenda and 38 at GBHS Bayelle on Tuesday January 31. Elsewhere; Mombakwed Victor said some colleges in the Elak- Oku area, Kumbo, Ndop, | | | | | | | | | | | | | |  |
|  | | |  |
|  | | |  | | | | | | | | | | | | | |  |
|  | | | | | | | | | | | | | | | | | |
| Reports\\Coding Summary By Source Report | | | | | | | | | | | Page 52 of 146 | | | | | | |
| 1/21/2023 3:45 PM | | | | | | | | | | | | | | | | | |
|  | | | **Classification** |  | **Aggregate** |  | **Coverage** |  | **Number Of Coding References** |  | | **Reference Number** |  | **Coded By Initials** |  | **Modified On** |  |
|  | | | | | | | | | | | | | | | | | |
|  | | | | | | | | | | | | 25 |  | CP |  | 1/21/2023 2:31 AM |  |
|  | | | Philemon Yang a dialogué vendredi et samedi derniers avec les leaders syndicaux du corps enseignant et des avocats. Un agenda élaboré pour mettre un terme à la grève des enseignants. Pendant de longues heures les 25 et 26 novembre 2016, le Premier ministre, chef du gouvernement, Philemon Yang, a échangé à Bamenda avec les forces vives de la région du Nord-Ouest pour un retour à la paix. C’était au lendemain du mouvement insurrectionnel qui a paralysé Bamenda le 21 novembre 2016, dans un contexte marqué par la grève des enseignants et des avocats. Pour y mettre un terme, le chef du gouvernement en personne est descendu sur le terrain. Accompagné du gouverneur de la région du Nord-Ouest, Adolphe Lele Lafrique, et du directeur de cabinet du Premier ministre, Pr Paul Ghogomu, le chef du gouvernement a eu de longs entretiens avec des délégations séparées de leaders syndicaux du corps enseignants, des avocats, des hommes d’église, des hommes politiques, des responsables de la société civile, des chefs traditionnels, des journalistes et des moto-taximen. En ce qui concerne la grève déclenchée par des syndicats d’enseignants, certains leaders syndicaux ont déclaré au reporter de CT sur place qu’un agenda comportant huit points a été adopté pour baliser la voie qui conduira à une suspension du mouvement de | | | | | | | | | | | | | |  |
|  | | |  |
|  | | |  | | | | | | | | | | | | | |  |
|  | | | | | | | | | | | | 26 |  | CP |  | 1/21/2023 2:45 AM |  |
|  | | | Life has been normal in the town since the visit of the Secretary General of the CPDM Central Committee to Buea. Some schools in the town of Buea have gone operational after the upheavals that took place in Buea and Bamenda, which led to the semi closure of certain schools because teachers deserted the classrooms. Most of the schools that are functioning normally are mostly the government secondary schools and primary schools. Apart from the educational sector, the normal day to day live the town used to have is back and it seems nothing ever went wrong. The business places around the town open on a daily basis, markets remain open on their normal days and the population goes in and out to buy various items that they need. Talking to some individuals, they believe dialogue with the government is the beginning of a lasting solution to any of the problems that are being posed. They added that the government must take decisive steps that will bring lasting solutions. Others think that the government should sort out the problems on the table in good faith by telling the Anglophones the truth. Another inhabitant | | | | | | | | | | | | | |  |
|  | | |  |
|  | | |  | | | | | | | | | | | | | |  |
|  | | | | | | | | | | | | 27 |  | CP |  | 1/21/2023 3:04 AM |  |
|  | | | Activities went normal yesterday as could be seen in all corners of the city. The City of Buea opened their week yesterday, Monday, in relative calm with the various government administrative offices open and receiving the public. Although schools were still not functional due to the strike action, public places were as busy as usual. As the Teachers prepare for their dialogue with Government any time soon the City of Buea is busy with markets and road-side stores open. Taxis were plying the streets to all corners of the town. The Regional Hospital and District Health Units of Muea and Buea Town were all attending to patients. Although discussions in the various offices and gatherings were, in the main, centred on the ghost-school deadlock, all hopes are that the impasse be resolved as soon as possible for pupils and students to resume classes. The | | | | | | | | | | | | | |  |
|  | | |  |
|  | | |  | | | | | | | | | | | | | |  |
|  | | | | | | | | | | | | 28 |  | CP |  | 1/21/2023 3:07 AM |  |
|  | | | C’est ce qui se dégage des deux jours de débats du Comité ad hoc présidé par le ministre Jean Pierre Fogui. Le Comité ad hoc chargé d’examiner et de proposer des solutions aux préoccupations des avocats anglophones a bouclé ses travaux hier. Deux jours de débats entre les 15 membres, sous la présidence de Jean Pierre Fogui, dans un climat de sérénité, de consensus et de responsabilité. Selon la déclaration du président du Comité, rendue publique à l’issue des discussions, les résolutions prises à l’issue de l’examen des cinq points inscrits à l’ordre du jour, seront transmises au Premier ministre, chef du gouvernement, pour appréciation. Toutefois, les travaux ont été suspendus hier en début d’après-midi, avant d’être repris plus tard. La raison ? La demande de rétablissement des associations d’avocats qui ont fait l’objet de dissolution ou d’interdiction par arrêtés préfectoraux dans le Nord-Ouest et le Sud-Ouest et d’élargissement | | | | | | | | | | | | | |  |
|  | | |  |
|  | | |  | | | | | | | | | | | | | |  |
|  | | | | | | | | | | | | 29 |  | CP |  | 1/21/2023 3:39 AM |  |
|  | | | C’est le souhait exprimé par les parents, élèves et étudiants, qui invitent les parties prenantes au dialogue pour aplanir leurs divergences et trouver des solutions concrètes aux problèmes posés. A Bamenda, chef-lieu de la région du Nord-Ouest, la vie suit son cours normal, après les tristes événements du 21 novembre et du 8 décembre derniers. Un tour effectué dans la ville hier en mi-journée a permis de constater que les forces de maintien de l’ordre sont présentes à certains endroits. Les activités économiques tournent cependant à plein régime. A l’avenue dite commerciale, les boutiques, magasins et agences bancaires sont ouverts et les transactions s’effectuent sans entraves | | | | | | | | | | | | | |  |
|  | | |  | | | | | | | | | | | | | |  |
|  | | | | | | | | | | | | 30 |  | CP |  | 1/21/2023 3:39 AM |  |
|  | | | Life and business activities go on normally in the city of Bamenda. As members of the ad hoc committee ended deliberations in Bamenda on Tuesday December 27, 2016, with cabinet ministers already back to work in Yaounde, anxiety is mounting in the city for schools to resume. Parents, education stakeholders and students have expressed the wish for lasting solutions to be found for effective classes to recommence early January. The city of Bamenda is bustling with its normal commercial activities as security forces are stationed in major road junctions of the North West Regional capital. Even though parents and students expressed the desire to see schools reopen their doors, their greatest expectation is for both parties to dialogue for a consensus. Parents however stated that without dialogue and solutions proffered, they will hold back their kids for the fear of the unknown. Parents, | | | | | | | | | | | | | |  |
|  | | |  |
|  | | |  | | | | | | | | | | | | | |  |
|  | | | | | | | | | | | | | | | | | |
| Reports\\Coding Summary By Source Report | | | | | | | | | | | Page 53 of 146 | | | | | | |
| 1/21/2023 3:45 PM | | | | | | | | | | | | | | | | | |
|  | | | **Classification** |  | **Aggregate** |  | **Coverage** |  | **Number Of Coding References** |  | | **Reference Number** |  | **Coded By Initials** |  | **Modified On** |  |
|  | | | | | | | | | | | | | | | | | |
|  | | | | | | | | | | | | 31 |  | CP |  | 1/21/2023 3:41 AM |  |
|  | | | While government and teachers’ trade union leaders were still meeting it was rumoured that the leaders had been taken hostage and forced to signed The social media is a veritable source of information but then can generate falsehood that can set a nation ablaze. In Cameroon, the social media has proven to pose more harm than good. This was the case last Friday in Bamenda when lies through the social media almost set the city ablaze. While the inter-ministerial Ad hoc committee meeting was going on at the Governor’s Office, rumours went wild in town around 8 p.m. that the teachers’ trade union leaders had been taken hostage and were forced to sign committee documents out of their will, some even said the trade union leaders have been beaten up. This information spread like wild fire and in less than no time some people went mounting barricades, as well as the burning tires on the road and the burning of cars. Some anxious youths stormed the Governor’s Office and were singing gospel songs. Due to the confrontation with | | | | | | | | | | | | | |  |
|  | | |  |
|  | | |  | | | | | | | | | | | | | |  |
|  | | | | | | | | | | | | 32 |  | CP |  | 1/21/2023 3:42 AM |  |
|  | | | Institutions of learning went dead again yesterday across the Region. In spite of the on-going dialogue engaged since the 27 December in Bamenda between Government and teachers’ syndicates to break the ghost school stalemate, schools failed to resume yesterday, 16 January in most of the South West Region. The strike action obliging pupils and students to stay away from schools embraced the second month, as schools remained empty and quiet as graveyards yesterday in most of the six Divisions of the South West Region. In Buea the Regional capital, Government and private primary, secondary and Higher Institutions received neither teachers nor learners ready for classes. A few Francophone students in uniform were spotted at the BGS Molyko-Buea by 10 am but the campus soon became dry before mid day. In Limbe it was the same scenario as no classes were held in the key schools situated on the major road sides. Cameroon Tribune made rounds in Limbe and Buea and observed no school taking effective classes. News from Lebialem Division spoke of ghost towns added to ghost schools in Menji. In Kumba, capital of Meme Division, the situation remained morose with no classes, | | | | | | | | | | | | | |  |
|  | | |  |
|  | | |  | | | | | | | | | | | | | |  |
|  | | | | | | | | | | | | 33 |  | CP |  | 1/21/2023 3:45 AM |  |
|  | | | Governor Adolphe Lele Lafrique sensitised Bui, Ngoketunjia Division to resume schools. Encouraging academic activities welcomed North West Governor Adolphe Lele L'Afrique to Oku Subdivision on Tuesday, February 7, 2017. The Governor who is on a sensitization tour to encourage schools to resume in Bui and Ngoketunjia Divisions saluted effective teaching and learning at GHS -Elak, Oku which showcased 318 purely English subsystem students out of 1,035 enrolled. The neighborhood of GS Keyon-Oku also featured some 74 out of 274 pupils receiving lessons. It was a happier Governor who left the schools to the Oku Community Radio Station where the facility was used to further crusade and mobilised the population to give their children a chance to return to school after the suspension of the strike action last Saturday February 4, 2017. The Governor was in Oku from GBHS Kumbo where some 31 English Subsystem students | | | | | | | | | | | | | |  |
|  | | |  |
|  | | |  | | | | | | | | | | | | | |  |
|  | | | | | | | | | | | | 34 |  | CP |  | 1/21/2023 3:51 AM |  |
|  | | | Against Suspects Below is the introductory statement of the Minister of Communication, Issa Tchiroma Bakary during a press briefing on February 15, 2017 “Ladies and Gentlemen, It is a great pleasure for me to wish you a warm welcome to this press briefing which I have invited you to update you on the judicial proceedings against some persons accused following the recent events in the South-West and North-West Regions. As you know, the events that I just mentioned unfortunately resulted, in some places, in acts of violence or led to cases of violation of the law, that have been referred before the courts, to hold each and everyone liable. As part of the legal action, 82 people were arrested, and 21 were subsequently released. Of the 61 persons still under detention, 31 are awaiting trial before the competent court, namely, the Yaoundé Military Court. It should be noted that among those awaiting trial, one of them is appearing freely. Concerning the trial which was opened at the Yaoundé Military Court on last February 13, | | | | | | | | | | | | | |  |
|  | | |  |
|  | | |  | | | | | | | | | | | | | |  |
|  | | | | | | | | | | | | 35 |  | CP |  | 1/21/2023 3:52 AM |  |
|  | | | Though some schools gates were widely open, pupils and students are still dragging their feet. Despite the most recent calls by PTA presidents, All Anglophone Teachers Trade Unions leaders as well as that of the Prime Minister Philemon Yang on Monday 6th March for parents to send their children to school on March 7th, most parents in the city of Bamenda are still hesitant to heed to the call. Some of them complained of threats from unidentified individuals while others hold that amnesty be granted to those arrested as a result of the strike. During a sojourn of some schools in Bamenda, CT discovered that some schools whose gates were shut all this while were now open with school administrators and teachers present but without pupils or students. In one of the private primary schools visited, CT spotted about 10 pupils receiving lessons. At GBHS Bamenda, the number of students attending classes have increased to about 1,016 students of both subsystems although the students of the Anglophone subsystem remain under 400. At PCHS Mankon no student came for classes but some students were seen registering for the GCE examination while both teaching and administrative staff watched on. At the Big Mankon | | | | | | | | | | | | | |  |
|  | | |  |
|  | | |  | | | | | | | | | | | | | |  |
|  | | | | | | | | | | | | 36 |  | CP |  | 1/21/2023 3:56 AM |  |
|  | | | were spotted during Court Sessions on May 2, 2017 in Bamenda Six months after Common Law Lawyers began their strike action, the Courts of Law in Bamenda are still in short supply of the men and women of the law. In effect, robes and Whigs were rare on May 2, 2017, the day Lawyers were expected to resume sessions. By 10 am, the North West Court of Appeal featured some two Lawyers. Meanwhile, Courts II and III of the Mezam High Court featured full Criminal Sessions with only two Lawyers present in both. The Cause list for Court II carried some 31 matters for the day’s hearings., Court I of the High Court was handling Preliminary Investigations in a case of aggravated theft | | | | | | | | | | | | | |  |
|  | | |  | | | | | | | | | | | | | |  |
| Reports\\Coding Summary By Source Report | | | | | | | | | | | Page 54 of 146 | | | | | | |
| 1/21/2023 3:45 PM | | | | | | | | | | | | | | | | | |
|  | | | **Classification** |  | **Aggregate** |  | **Coverage** |  | **Number Of Coding References** |  | | **Reference Number** |  | **Coded By Initials** |  | **Modified On** |  |
|  | | | | | | | | | | | | | | | | | |
|  | | | | | | | | | | | | 37 |  | CP |  | 1/21/2023 4:08 AM |  |
|  | | | North West Governor, Adolphe Lele Lafrique comforts victims receiving treatment in Kumbo health facility Monday, September 4, 2017 was unusual in Kumbo, Bui Division where a confrontation between the Forces of Law and Order and the population turned ugly, leading to the erection of barricades on the streets, burnings, destruction of public property and the death of one person at press time. It all started in the neighbourhood of Mbiame, where some elements of the Bui Gendarmerie Company filed out, in search of suspected drug traffickers. It emerged from field reports that the arrested suspects were quick to alert armed accomplices who mobilized to rescue them. Reports have it that in an attempt to have the situation under control, the Gendarme elements wounded three of the suspects, one of whom later died while five Gendarmes also suffered injuries. In an attempt to carry the corpse towards Kumbo town the angry population was overpowered by the Forces of Law and Order, but the population moved on to burn the administrative block of GBHS Kumbo, vandalized some blocks and the Principal’s office at GSS Mbveh, vandalized windows of the SDO’s office as well as those of the Divisional | | | | | | | | | | | | | |  |
|  | | |  |
|  | | |  | | | | | | | | | | | | | |  |
|  | | | | | | | | | | | | 38 |  | CP |  | 1/21/2023 4:12 AM |  |
|  | | | One year already since the start of what is commonly called; «the anglophone crisis». It began on 10 October 2016 with claims from trade unionists, but it quickly transposed into the political arena. This was supported by the fact that some fellow compatriots whose confessed purpose was none other than the partition of Cameroon for the most extremists, or the revision of the present form of the State, saw it as a kind of panacea to the issues raised. In a context where the crisis seems to be sinking and where voices rise here and there, evoking henceforth and at any rate dialogue as a therapeutic shock to curb a symptomatically cancerous evil, one is tempted to rewind the hands of time for historical purposes, to the course of these last months whose milestones are more than indicative of what until then, the State through the President of the Republic, His Excellency Paul BIYA, has done on this matter. Let us review the history and the agenda of the last twelve months. The first pages of the month of September 2016, are well inscribed with trade unionists claims | | | | | | | | | | | | | |  |
|  | | |  |
|  | | |  | | | | | | | | | | | | | |  |
|  | | | | | | | | | | | | 39 |  | CP |  | 1/21/2023 4:18 AM |  |
|  | | | Among the measures, all traditional rulers must identify strangers and report to the administration regularly. Governor Bernard Okalia Bilai has ordered a series of measures to protect citizens, property and territorial integrity for the entire South West Region. In a communiqué number 139/L/G/SEC22/SP signed last Friday, 10 November, 2017, the Chief Executive of the Region prohibited the circulation of motorbikes within the hours of 7pm to 6am. Equally, all hunting activities with the use of fire-arms are suspended. The order also prohibits the use of fire-arms during traditional ceremonies like burials, funerals. All licenced armouries as well as the sale of fire-arms and ammunitions are prohibited henceforth. The Governor’s order calls on all owners of fire-arms, hunting rifles, locally fabricated guns or personal protection pistols to obligatorily present themselves to the Divisional Officer for identification | | | | | | | | | | | | | |  |
|  | | |  |
|  | | |  | | | | | | | | | | | | | |  |
|  | | | **Nodes\\Financial Support** | | | | | | | | | | | | | |  |
|  |  | No |  | 0.0081 |  | 7 |  | | | | | | |
|  | | |  |  |  |  |  |  |  |  | | | | | | | |
|  | | | | | | | | | | | | 1 |  | CP |  | 1/21/2023 1:32 AM |  |
|  | | | Nora Ndem, actrice camerounaise, a remis des produits de première nécessité dimanche à Bonabéri. Des sacs de riz, de pâtes alimentaires, des cartons de lait, de sucre, d’huile, de tomate en conserve, de savon, des paquets de papier et de serviettes hygiéniques, des répulsifs anti-moustiques, etc. Ce sont les produits de première nécessité apportés par Nora Ndem, actrice et mannequin camerounais, aux déplacés internes venus du Nord-Ouest et du Sud-Ouest et basés à Bonabéri Bloc 6, quartier Minkwele-Bonendalè, dans l’arrondissement de Douala IV. C’était lors d’une remise de dons dimanche 6 janvier 2018, dans le cadre de l’initiative « IDP Support ». IDP pour Internally Displaced Persons. | | | | | | | | | | | | | |  |
|  | | |  | | | | | | | | | | | | | |  |
|  | | | | | | | | | | | | 2 |  | CP |  | 1/21/2023 1:41 AM |  |
|  | | | La cérémonie de remise a été présidée par le ministre des Enseignements secondaires, Pr.Nalova Lyonga samedi 13 janvier à Bafang. Blanche Nicaise Shuri, une élève déplacée de la région du Nord-Ouest n’a pas caché son émotion samedi ,13 janvier 2019, après avoir reçu des mains du ministre des Enseignements secondaires, le Pr.Nalova Lyonga une bourse scolaire de 50 000 F. Cet argent valui permettre de poursuivre ses études, après que sa famille a fui cette région en crise. Comme elle, ils sont au total 100 jeunes des lycées et collèges, dont 30 élèves déplacés des régions du Nord-ouest et du Sud-ouest à avoir reçu des bourses scolaires d’une valeur de 50 000 F samedi dernier à Bafang, département du Haut-Nkam. Ce don est l’œuvre d’un fils de ce département, Brice Tchoualeu, à travers la Fondation HYE (Helping Youth Through Education) qu’il dirige. Ce jeune qui évolue dans la diaspora s’est souvenu de son pays, le Cameroun, et | | | | | | | | | | | | | |  |
|  | | |  |
|  | | |  | | | | | | | | | | | | | |  |
|  | | | | | | | | | | | | 3 |  | CP |  | 1/21/2023 1:57 AM |  |
|  | | | Mayor Ekema Patrick Esunge handed the parcels to the pupils and students on August 30, 2019, at the Buea Council Hall. 2000 Pupils and students drawn from Bonjongo, Muea, Bonavanda and Buea Central Court Areas that made up the Buea Municipality are beginning school today with most of their school needs provided. The Mayor of Buea Council, Ekema Patrick Esunge, handed to each child, on Friday August 30, 2019, a school bag that contained exercise books, pens, pencils, rulers etc. Head Teachers of all Government Nurseries and Primary Schools in Buea Municipalityeach received large consignments of teaching materials that consisted ofpackets of chalks, packets of blue pens, black rulers, reams of papers, paper founders, coloured chalk, rakes, shovels etc. Their First Aid boxes were also reinforced | | | | | | | | | | | | | |  |
|  | | |  |
|  | | |  | | | | | | | | | | | | | |  |
| Reports\\Coding Summary By Source Report | | | | | | | | | | | Page 55 of 146 | | | | | | |
| 1/21/2023 3:45 PM | | | | | | | | | | | | | | | | | |
|  | | | **Classification** |  | **Aggregate** |  | **Coverage** |  | **Number Of Coding References** |  | | **Reference Number** |  | **Coded By Initials** |  | **Modified On** |  |
|  | | | | | | | | | | | | | | | | | |
|  | | | | | | | | | | | | 4 |  | CP |  | 1/21/2023 2:05 AM |  |
|  | | | Some 35 women from the North West and South Regions will benefit from the 10 million FCFA initiative sponsored by another widow, Mrs. Jumbam Rebecca Seh. One of the consequences of the ongoing armed conflict in the North West and South West Regions is the plight of women who lose their husbands. Apart from having to cope with the trauma of the loss, these hapless women often struggle to fend for themselves and their children. Moved by their plight, a Yaounde-based lady, Mrs. Jumbam Rebecca Seh, from August 7-8, 2020 in Yaounde gathered 20 widows from the crisis resident in the North West and South West Regions. Mrs. Jumbam lost her husband to the war on March 28, 2020. Addressing | | | | | | | | | | | | | |  |
|  | | |  | | | | | | | | | | | | | |  |
|  | | | | | | | | | | | | 5 |  | CP |  | 1/21/2023 2:07 AM |  |
|  | | | spent Christmas with food items generously offered by their son and Minister Delegate at the Ministry of External Relations, Felix Mbayu. The neighborhood of Old Town, the birth place of Metropolitan Bamenda spent the feast of Christmas on December 25th 2019 with little to worry about. There was enough to show for food items with their son; who doubles as the Minister Delegate at the Ministry of External Relations, Felix Mbayu to thank for helping matters with 55 bags of rice, 25 cartons of groundnut oil, 25 cartons of maggi and 25 cartons of tomatoes. Beneficiaries were virtually all the households of Old Town which covers the quarters of Ntambag I, II and III. The food items, worth about 4.2 million FCFA were received with gratitude by inhabitants in difficult times when the socio-political and security crisis | | | | | | | | | | | | | |  |
|  | | |  |
|  | | |  | | | | | | | | | | | | | |  |
|  | | | | | | | | | | | | 6 |  | CP |  | 1/21/2023 4:28 AM |  |
|  | | | An Agreement has been signed with some 18 North West and South West based civil society organisations for infrastructure and livelihood development. A quick return to normalcy in the North West and South West regions preoccupies the United Nations Development Programme, UNDP, whose small grants initiative to help matters inspires hope for many, suffering the consequences of the socio-political and security crisis rocking the regions. In effect, the UNDP has signed MOUs with some 18 North West and South West-based Civil Society Organisations to promote early economic recovery and social cohesion, support infrastructure and livelihood recovery in the affected regions. All beneficiary CSOs have received FCFA 180 million to fund projects that address livelihood issues, but also community dialogue, economic recovery and social cohesion through sports. The MOU event on 31st July, 2019 stressed the need for contributions to the wider effort of the Cameroon government and UN Agencies in Cameroon to promote social cohesion, reduce vulnerability and assist efforts in the North West and South West. It was against this backdrop, that the Resident Representative of the UNDP, Jean Luc Stalon said his organization’s strategic support to Cameroon's development agenda for 2018-2020 is based on UN development assistance framework. It is all about support that | | | | | | | | | | | | | |  |
|  | | |  |
|  | | |  | | | | | | | | | | | | | |  |
|  | | | | | | | | | | | | 7 |  | CP |  | 1/21/2023 4:29 AM |  |
|  | | | The gifts from the presidential convoy transported in about 100 truckloads will be shared to internally displaced person in both regions. A huge humanitarian convoy from the presidential couple containing foodstuffs, sanitary kits and bedding equipment has arrived the North West and South West Regions for onward distribution to internally displaced persons affected by the ongoing sociopolitical situation in both regions. The about 100 truckloads of items left Yaounde, Douala and Bafoussam on December 28, 2019. Territorial Administration Minister, Paul Atanga Nji, accompanied by the Governor for the Centre Region and some members of the United Nations agencies supervised the departure of 40 trucks leaving the esplanade of the Yaounde City Town Hall for the regions. Ahead of the departure, Minister Atanga Nji, said the gesture from the presidential couple is clear prove that necessary measures have been taken to provide humanitarian assistance to the population. “It is equally an indication that there is no humanitarian crisis in Cameroon as the situation of internally | | | | | | | | | | | | | |  |
|  | | |  |
|  | | |  | | | | | | | | | | | | | |  |
|  | | | **Nodes\\Hostage** | | | | | | | | | | | | | |  |
|  |  | No |  | 0.0012 |  | 1 |  | | | | | | |
|  | | |  |  |  |  |  |  |  |  | | | | | | | |
|  | | | | | | | | | | | | 1 |  | CP |  | 1/21/2023 3:45 AM |  |
|  | | | Lors d’un échange avec la presse mercredi à Yaoundé, le Conseil national de la Jeunesse dénonce la prise en otage des élèves. Mercredi dernier, le Conseil national de la Jeunesse du Cameroun (CNJC) a organisé une rencontre avec la presse, afin de se prononcer sur la crise dans les régions du Nord- Ouest et du Sud-Ouest. Car, comme l’a indiqué Jean Marc Afessi Mbafor, le président national du CNJC, depuis le début des événements, l’instance n’avait pas encore dit un mot sur cette situation. Les responsables régionaux du CNJC ont donc dénoncé « la prise en otage des jeunes élèves et étudiants », par des grévistes et appelé à la reprise des cours et au dialogue dans la zone anglophone. Les leaders des jeunes ont salué les efforts du gouvernement « qui n’a cessé la médiation, question de trouver des pistes de sortie de cette crise ». Par ailleurs, ils ont invité la jeunesse à être vigilante, à ne pas se laisser manipuler par qui que ce soit. « Heureusement malgré | | | | | | | | | | | | | |  |
|  | | |  |
|  | | |  | | | | | | | | | | | | | |  |
|  | | | | | | | | | | | | | | | | | |
| Reports\\Coding Summary By Source Report | | | | | | | | | | | Page 56 of 146 | | | | | | |
| 1/21/2023 3:45 PM | | | | | | | | | | | | | | | | | |
|  | | | **Classification** |  | **Aggregate** |  | **Coverage** |  | **Number Of Coding References** |  | | **Reference Number** |  | **Coded By Initials** |  | **Modified On** |  |
|  | | | **Nodes\\Human Interest** | | | | | | | | | | | | | |  |
|  |  | No |  | 0.0138 |  | 11 |  | | | | | | |
|  | | |  |  |  |  |  |  |  |  | | | | | | | |
|  | | | | | | | | | | | | 1 |  | CP |  | 1/21/2023 12:57 AM |  |
|  | | | After the burning of the the Nkwen market, CENAJES Bamenda, some section of the Faculty of Health Science of the University of Bamenda just to name a few, the population woke up Tuesday March 14 to see the Food Market on flames. The fire that started around 2: 30 am ravaged a good portion of the market. According to the Government Delegate to the Bamenda City Council, Vincent Ndumu Nji about 10 lockup shops were completely ravaged by the fire and over 60 sheds were consumed. One of the victims Rose Sirri, told reporters that when she arrived the scene at about 3am she met her shop on flames. | | | | | | | | | | | | | |  |
|  | | |  | | | | | | | | | | | | | |  |
|  | | | | | | | | | | | | 2 |  | CP |  | 1/21/2023 1:14 AM |  |
|  | | | The incident caused the South West Chief Executive to go to Limbe. Though without loss of human life, at least 50 shops containing fowls, spices, palm oil, egusi, and much other food stuff have been razed to ashes in the night of Thursday breaking Friday (30-31 March) in the central Limbe Old Market. It was the second consecutive day Limbe was suffering from market arson as the neighbouring Limbe New Market had lost some four shops a night before to flames. The incident, as grievous as it was, caused the South West Governor, Bernard Okalia Bilai, to mobilise to the Limbe Market Friday afternoon especially as the suspect, through the help of the Limbe Council Vigilante group, had been caught and detained in the Limbe Central Police Station. Sources say the suspect was caught with fire-lighters and petrol at about 3 am Friday as he lit the last shops. The Limbe fire-fighting Brigade could only save the situation from escalating beyond the 50 shops burnt | | | | | | | | | | | | | |  |
|  | | |  |
|  | | |  | | | | | | | | | | | | | |  |
|  | | | | | | | | | | | | 3 |  | CP |  | 1/21/2023 1:42 AM |  |
|  | | | In a press conference organized in Douala on June 14, the ICRC authorities expressed the need to open their offices in the two affected regions. With the outbreak of violence in the two English speaking regions of Cameroon the International Committee of Red cross-ICRC has been present on the field to ensure that the humanitarian situation gets better. The ICRC delegation has been to both regions on several occasions to get first hand information on the situation so as to know how to ameliorate their intervention. After their visits to both regions, authorities of ICRC have decided to open regional offices in Bamenda and Buea so as to better intervene and help those affected. This was the principal message delivered in a press conference organized in Douala on the 14 of June 2019, during which the Assistant Regional Director for ICRC in Africa, Patrick Youssef, and the Head of Operation at Regional Delegation of ICRC for Central Africa Jérôme Fontana, both threw light on their activities in Cameroon. They said the movement has been to prison in the North West and South West regions and have visited prisons out of the regions to support those who were detained as a result of the ongoing crisis. For Mr Patrick Youssef, after their visits to both regions they realized that the humanitarian situation is degrading and the | | | | | | | | | | | | | |  |
|  | | |  |
|  | | |  | | | | | | | | | | | | | |  |
|  | | | | | | | | | | | | 4 |  | CP |  | 1/21/2023 2:09 AM |  |
|  | | | In a press conference in Yaounde on February 21, CAVAT appealed to countries and friends of Cameroon to apply their criminal and conspiracy laws to those perpetuating violence. The Cameroon Association of Victims of Ambazonia Terrorism (CAVAT) has called on countries and friends of Cameroon to apply their criminal, anti-terrorism and violence conspiracy laws to individuals of the selfproclaimed republic called ‘Ambazonia’ who are instigating violent acts in Cameroon. Led by Barrister Emmanuel Nsahlai who is lead Counsel of Victims of ‘Ambazonia’, members of the non-profit association granted a press conference in Yaounde on February 21, 2020 alongside some victims who have either suffered torture or kidnappings, calling on justice while praying for peace to return as soon as possible. According to CAVAT, individuals of the ghost ‘Ambazonia’ republic are in violation of a litany of laws and should countries hosting them apply their laws, the current quagmire rocking the North West and South West Regions will be adequately addressed, coupled with the efforts of government at ensuring a return to peace and | | | | | | | | | | | | | |  |
|  | | |  |
|  | | |  | | | | | | | | | | | | | |  |
|  | | | | | | | | | | | | 5 |  | CP |  | 1/21/2023 3:58 AM |  |
|  | | | Buea: Two Days Glooming Atmosphere Flags rest at half-mast while citizens went about their businesses dressed in black. From a distance, any person entering any public office in Buea last Friday, July 28, 2017 could easily tell that all was not well. First, all flags rested at half-mast while most workers were clothed in black. Before commencing work, most workers assembled in front of their offices and paid homage to the 34 soldiers who perished in a ship wreck in Debunsha near Limbe last July 16, 2017. Their prayers hinged on God to have compassion for the 34 souls and accommodate them in his bosom. As if to say the chariots of the gods on Mount Cameroon were equally in the mourning mood, the dull weather coupled with rain reinforced the glooming nature of the day. | | | | | | | | | | | | | |  |
|  | | |  | | | | | | | | | | | | | |  |
|  | | | | | | | | | | | | 6 |  | CP |  | 1/21/2023 4:08 AM |  |
|  | | | North West Governor, Adolphe Lele Lafrique advised returnees to contribute towards return to normalcy and avoid witch-hunting blame games. On the strength of President Paul Biya’s decision for the Military Tribunal in Yaounde to discontinue proceedings against some leaders arrested during the Anglophone crisis, Bamenda welcomed some of them back on September 1, 2017. The clocks stroke 8:45 am when some 38 of them arrived in the North West Governor’s office straight from Yaounde. It was an emotional moment for family members and friends who filed out to receive them as they emerged from the bus with North West Gendarmerie Legion Commander, Colonel. Nkoa Mala Valere ensuring superintendence | | | | | | | | | | | | | |  |
|  | | |  | | | | | | | | | | | | | |  |
| Reports\\Coding Summary By Source Report | | | | | | | | | | | Page 57 of 146 | | | | | | |
| 1/21/2023 3:45 PM | | | | | | | | | | | | | | | | | |
|  | | | **Classification** |  | **Aggregate** |  | **Coverage** |  | **Number Of Coding References** |  | | **Reference Number** |  | **Coded By Initials** |  | **Modified On** |  |
|  | | | | | | | | | | | | | | | | | |
|  | | | | | | | | | | | | 7 |  | CP |  | 1/21/2023 4:19 AM |  |
|  | | | Visiting Secretary of State in charge of the National Gendarmerie is in Bamenda to preside over the event. The last journey for some three military personnel recently killed in Jakiri and Bamenda begins today November 17, 2017 in Bamenda with military honours. In effect, the Secretary of State at the Ministry of Defense in charge of the National Gendarmerie is in Bamenda for the funeral event, conceived to standby the fallen gendarmes. They are, Gendarme- Major, Djonlay Bienvenu, killed on November 6, 2017 in Jakiri, Bui Division while searching for suspects who allegedly set ablaze GTHS Jakiri. Marechal- des Logis Chef, Hinma Rene, another Gendarme was killed on the night of November 7th, 2017 at about 11:30 pm at a Joint Check Point in Bafut, Mezam Division while Student Gendarme, Sali David was killed in the night of November 8th, 2017 in the neighbourhood of | | | | | | | | | | | | | |  |
|  | | |  |
|  | | |  | | | | | | | | | | | | | |  |
|  | | | | | | | | | | | | 8 |  | CP |  | 1/21/2023 4:32 AM |  |
|  | | | The 15 people captured by separatist fighters in Bessali, Lebialem Division reunited with their families during a ceremony in Kumba on October 15, 2020. Some 15 persons taken into captivity by separatist fighters in Bessali, Wabane Subdivision, Lebialem Division of the South West Region, liberated by elements of the Sixth Military Battalion of the Rapid Intervention Battalion, (B.I.R) in the South West Region have reunited with their families. A ceremony to that effect took place on Thursday, October 15, at the B.I.R Military Base in Mambanda, Kumba, presided over by the Senior Divisional Officer for Meme Sivision, Chamberlin Ntou'ou Ndong, in the presence of the Commander of the Sixth Military Battalion of the Rapid Intervention Battalion for the South West Region, Lieutenant Colonel Maidoang Desire. Speaking at the ceremony, an elated Senior Divisional Officer for Meme Division reassured the freed hostages that the government of Cameroon will continue to protect the lives and property of the population. He reiterated the Head of State, President Paul Biya’s call on the Separatist fighters to drop their arms and get to the Disarmament, Demobilisation and Reintegration (DDR) Centres in order to be reintegrated into the society, failure of which the consequences will be grave and weighty. While commending the efforts of Cameroon's military | | | | | | | | | | | | | |  |
|  | | |  |
|  | | |  | | | | | | | | | | | | | |  |
|  | | | | | | | | | | | | 9 |  | CP |  | 1/21/2023 4:33 AM |  |
|  | | | On the call of the Minister of Women’s Empowerment and the Family, the yesterday’s gathering was intended at denouncing the gruesome act which is a gross human right violation. Following the killing of school children at the Mother Francisca International Bilingual Academy complex in Kumba on October 24, 2020, women, government officials converged at the Yaounde City town hall and offered prayers of peace for the nation while denouncing the horrific and unbearable act of violence. On the call of the Minister of Women’s Empowerment and the Family, Marie Thérèse Abena Ondoa, the objective was to show sympathy with the affected families and call for an end to barbarism. In her declaration, Minister Abena Ondoa said the hideous attack which led to bloodshed and tears is a gross violation of human rights which need to be condemned today for tomorrow might be too late and other children may suffer same fate if silence is maintained. “Where did these children go wrong, what crime did they comment? These children were in the quest for learning, for knowledge, for education. These innocent | | | | | | | | | | | | | |  |
|  | | |  |
|  | | |  | | | | | | | | | | | | | |  |
|  | | | | | | | | | | | | 10 |  | CP |  | 1/21/2023 4:33 AM |  |
|  | | | En soutien aux victimes du massacre survenu le week-end dernier, elles se sont regroupées le 26 octobre dernier à Yaoundé, au Boulevard du 20 mai. L’horreur et la consternation suscitées par le massacre des élèves à Kumba, le week-end dernier, n’ont pas laissé indifférentes les femmes journalistes. Un collectif de cette corporation s’est joint le 26 octobre dernier à Yaoundé, aux femmes et filles du SudOuest rassemblées au Boulevard du 20 mai, lieu symbolique de la réunification du Cameroun, pour honorer la mémoire des victimes de cet assassinat. A leurs côtés au Boulevard, on pouvait reconnaître Rose Mbah Acha, ministre délégué à la présidence de la République chargée du Contrôle supérieur de l’Etat. Toutes de noir vêtues, la mine maussade, ces dames tenaient une banderole sur laquelle on pouvait lire : « Nous pleurons et demandons : qu’est-ce que nos enfants ont fait pour être tués ? » | | | | | | | | | | | | | |  |
|  | | |  |
|  | | |  | | | | | | | | | | | | | |  |
|  | | | | | | | | | | | | 11 |  | CP |  | 1/21/2023 4:34 AM |  |
|  | | | South West Women and children took to the streets demanding an end to the killings in the North West and South West Regions as they mourned school children murdered in Kumba. Wailing engulfed the town of Buea yesterday, October 28, 2020, as South West Women and children took to the streets mourning the mass execution of students in Kumba by separatists on October 24, 2020. Dressed in black attires and with peace plants in hands, they marched from Check Point in Molyko through Bongo Square, Buea Regional Hospital and to South West Governor’s Office. At the Buea Regional Hospital, they prayed for the speedy recovering of two of the Kumba carnage victims who are receiving treatment. Be it at Check Point, Bongo Square, Buea Regional Hospital or Esplanade of South West Governor Office, the women and children wailed uncontrollably that attacks on children and women should stop. They equally requested an end to the sociopolitical upheavals in the North West and South West Regions of Cameroon. In hand were signboards expressing their demands. “We want a Cameroon where children can go to school and come back alive”, “Stop the war”, “Stop the killings”, “Stop killing | | | | | | | | | | | | | |  |
|  | | |  |
|  | | |  | | | | | | | | | | | | | |  |
|  | | | | | | | | | | | | | | | | | |
| Reports\\Coding Summary By Source Report | | | | | | | | | | | Page 58 of 146 | | | | | | |
| 1/21/2023 3:45 PM | | | | | | | | | | | | | | | | | |
|  | | | **Classification** |  | **Aggregate** |  | **Coverage** |  | **Number Of Coding References** |  | | **Reference Number** |  | **Coded By Initials** |  | **Modified On** |  |
|  | | | **Nodes\\Lives Lost** | | | | | | | | | | | | | |  |
|  |  | No |  | 0.0082 |  | 6 |  | | | | | | |
|  | | |  |  |  |  |  |  |  |  | | | | | | | |
|  | | | | | | | | | | | | 1 |  | CP |  | 1/21/2023 2:05 AM |  |
|  | | | Femmes assassinées dans le Nord-Ouest et le Sud-Ouest : afin que nul n’oublie Après sa sortie la semaine dernière à Yaoundé pour dénoncer ces crimes, c’est par une offre symbolique que le Minproff a célébré hier la mémoire des victimes. Une page entière et en couleur du quotidien national bilingue Cameroon Tribune. En fait de couleurs, il s’agit, en fond, d’un ciel bleu clairsemé de nuages blancs. Y ont été apposées les portraits de Florence Ayafor, Achiri Comfort Tumassang, Mbah Treasure, devenues à leurs corps défendant les visages de la barbarie humaine dans les régions du Nord-Ouest et du Sud-Ouest. Une longue liste, du reste non exhaustive, d’autres femmes tombées sous les coups des séparatistes anglophones et trois colombes, certainement porteuses d’espoir pour une sortie définitive de ce conflit, complètent le tableau rogné du vert-rouge-jaune national. C’est la manière du ministre de la Promotion de la Femme | | | | | | | | | | | | | |  |
|  | | |  |
|  | | |  | | | | | | | | | | | | | |  |
|  | | | | | | | | | | | | 2 |  | CP |  | 1/21/2023 4:20 AM |  |
|  | | | Below is an introductory statement from the Minister of Communication. “In the night between November 28 and 29, 2017, some heavily armed terrorists attacked the elements of our Defence and Security Forces dispatched within the framework of an assignment to protect the territorial integrity of our country in the Agborkem German locality, in the Manyu Division, South-West Region. Four servicemen of the 22nd Motorized Infantry Batallion of our army were coldly assassinated during this attack. They are Staff Sergeant TIH Julius Angu, Lance Corporal VOULA VOULA Victor, Private Second Class YINDA BOBEKREO and Private Second Class NOUTCHOMWO MANY Raphael Willy. The assailants, who claimed to belong to the armed wing of the secessionist movement called “Southern Cameroons Ambazonia Consortium United Front” (SCACUF) probably came on canoes, making their way through the particularly intense fluvial traffic in this area, due to the strong presence of fishermen and traders. The President of the Republic, His Excellency Paul BIYA, Head of State, Commander-in-Chief of the Army, pays a vibrant homage to the memory of these valiant servicemen who fell in the battlefield while on duty to defend our dear fatherland. To our Defense and Security Forces, the | | | | | | | | | | | | | |  |
|  | | |  |
|  | | |  | | | | | | | | | | | | | |  |
|  | | | | | | | | | | | | 3 |  | CP |  | 1/21/2023 4:32 AM |  |
|  | | | North West governor, mourners agree that gun shots must be silenced to give children a chance to exercise their right to education. Peace-plant carrying Bamenda inhabitants were on the streets on October 27, 2020, mourning what they described as the unqualified barbarism on innocent students of the Kumba- based Mother Francisca International Bilingual academy on October 24, 2020. The day was early to break for the city's women and youths who stormed the streets, singing mourning songs and cursing pepetrators of the gruesome killings that left the families of the students, the entire education family and the nation in pain. They carried placards with messages that speak. Among the lot, there were messages like "stop the War". "Down the guns", "stop the killings", "education is a must for our children", "we need peace". The protesters who featured in black went from the streets of the Nkwen, Bamenda III neighbourhood, through the commercial avenue , T junction Ayaba street and Finance juction. Their final destination was the upstation premises of the North West governor's office where they featured a pathetic scene. The | | | | | | | | | | | | | |  |
|  | | |  |
|  | | |  | | | | | | | | | | | | | |  |
|  | | | | | | | | | | | | 4 |  | CP |  | 1/21/2023 4:33 AM |  |
|  | | | On the call of the Minister of Women’s Empowerment and the Family, the yesterday’s gathering was intended at denouncing the gruesome act which is a gross human right violation. Following the killing of school children at the Mother Francisca International Bilingual Academy complex in Kumba on October 24, 2020, women, government officials converged at the Yaounde City town hall and offered prayers of peace for the nation while denouncing the horrific and unbearable act of violence. On the call of the Minister of Women’s Empowerment and the Family, Marie Thérèse Abena Ondoa, the objective was to show sympathy with the affected families and call for an end to barbarism. In her declaration, Minister Abena Ondoa said the hideous attack which led to bloodshed and tears is a gross violation of human rights which need to be condemned today for tomorrow might be too late and other children may suffer same fate if silence is maintained. “Where did these children go wrong, what crime did they comment? These children were in the quest for learning, for knowledge, for education. These innocent | | | | | | | | | | | | | |  |
|  | | |  |
|  | | |  | | | | | | | | | | | | | |  |
|  | | | | | | | | | | | | 5 |  | CP |  | 1/21/2023 4:33 AM |  |
|  | | | En soutien aux victimes du massacre survenu le week-end dernier, elles se sont regroupées le 26 octobre dernier à Yaoundé, au Boulevard du 20 mai. L’horreur et la consternation suscitées par le massacre des élèves à Kumba, le week-end dernier, n’ont pas laissé indifférentes les femmes journalistes. Un collectif de cette corporation s’est joint le 26 octobre dernier à Yaoundé, aux femmes et filles du SudOuest rassemblées au Boulevard du 20 mai, lieu symbolique de la réunification du Cameroun, pour honorer la mémoire des victimes de cet assassinat. A leurs côtés au Boulevard, on pouvait reconnaître Rose Mbah Acha, ministre délégué à la présidence de la République chargée du Contrôle supérieur de l’Etat. Toutes de noir vêtues, la mine maussade, ces dames tenaient une banderole sur laquelle on pouvait lire : « Nous pleurons et demandons : qu’est-ce que nos enfants ont fait pour être tués ? » | | | | | | | | | | | | | |  |
|  | | |  |
|  | | |  | | | | | | | | | | | | | |  |
|  | | | | | | | | | | | | | | | | | |
| Reports\\Coding Summary By Source Report | | | | | | | | | | | Page 59 of 146 | | | | | | |
| 1/21/2023 3:45 PM | | | | | | | | | | | | | | | | | |
|  | | | **Classification** |  | **Aggregate** |  | **Coverage** |  | **Number Of Coding References** |  | | **Reference Number** |  | **Coded By Initials** |  | **Modified On** |  |
|  | | | | | | | | | | | | | | | | | |
|  | | | | | | | | | | | | 6 |  | CP |  | 1/21/2023 4:34 AM |  |
|  | | | South West Women and children took to the streets demanding an end to the killings in the North West and South West Regions as they mourned school children murdered in Kumba. Wailing engulfed the town of Buea yesterday, October 28, 2020, as South West Women and children took to the streets mourning the mass execution of students in Kumba by separatists on October 24, 2020. Dressed in black attires and with peace plants in hands, they marched from Check Point in Molyko through Bongo Square, Buea Regional Hospital and to South West Governor’s Office. At the Buea Regional Hospital, they prayed for the speedy recovering of two of the Kumba carnage victims who are receiving treatment. Be it at Check Point, Bongo Square, Buea Regional Hospital or Esplanade of South West Governor Office, the women and children wailed uncontrollably that attacks on children and women should stop. They equally requested an end to the sociopolitical upheavals in the North West and South West Regions of Cameroon. In hand were signboards expressing their demands. “We want a Cameroon where children can go to school and come back alive”, “Stop the war”, “Stop the killings”, “Stop killing | | | | | | | | | | | | | |  |
|  | | |  |
|  | | |  | | | | | | | | | | | | | |  |
|  | | | **Nodes\\Peace and Unity** | | | | | | | | | | | | | |  |
|  |  | No |  | 0.0889 |  | 77 |  | | | | | | |
|  | | |  |  |  |  |  |  |  |  | | | | | | | |
|  | | | | | | | | | | | | 1 |  | CP |  | 1/21/2023 1:02 AM |  |
|  | | | They braved the odds to celebrate thier day at the commercial Avenue grand stand. The women folk of the North West regional capital Bamenda joined their counterparts world wide to commemorate the international women's day this March 8, 2017. The venue was the commercial Avenue grand stand where the women ignored calls of boycott to celebrate their day | | | | | | | | | | | | | |  |
|  | | |  | | | | | | | | | | | | | |  |
|  | | | | | | | | | | | | 2 |  | CP |  | 1/21/2023 1:04 AM |  |
|  | | | No Cameroonian can be indifferent to the prevailing insecurity in some parts of the country such as the Boko Haram insurgency in the north and the intermittent clashes between the military, security forces and armed men in the North West and South West Regions. Adding his voice to calls for return to normalcy, Njang artiste, Lemmy Moïse - whose real name is Lemngeh Moses Bruce - last year released “Real Peace,” a single-track album. “I was motivated by the incessant wars around the world, Boko Haram attacks and the troubles in the North West and South West Regions of Cameroon,” explains Lemmy. “Real Peace” “talks about situations that cause war and suggests how to attain real, lasting peace,” says Lemnyuy | | | | | | | | | | | | | |  |
|  | | |  | | | | | | | | | | | | | |  |
|  | | | | | | | | | | | | 3 |  | CP |  | 1/21/2023 1:05 AM |  |
|  | | | The Head of State has ordered special subventions to lay private and denominational schools and recruitment of bilingual teachers. Since Thursday, December 1, 2016, the education community in Cameroon has witnessed salvaging measures taken by the Head of State, Paul Biya intended to bring serenity and order in the education sector, as well as improve the quality of teaching. The government measures have come within the context of the strike by teachers in the English speaking part of Cameroon and a planned strike by the others. | | | | | | | | | | | | | |  |
|  | | |  | | | | | | | | | | | | | |  |
|  | | | | | | | | | | | | 4 |  | CP |  | 1/21/2023 1:11 AM |  |
|  | | | They were congratulated recently by North West Governor for the responsible reporting of the protest. The Governor of the North West Region, Adolphe Lele L’Afrique has given journalists a pat on the back for a job well done during the period of crises in the region. While congratulating some journalists he called on others to sit up. He urged journalists to be responsible in reporting saying that they should help in promoting peace. He added that the objective of the government is | | | | | | | | | | | | | |  |
|  | | |  | | | | | | | | | | | | | |  |
|  | | | | | | | | | | | | 5 |  | CP |  | 1/21/2023 1:13 AM |  |
|  | | | The number of students in ‘the place to be’ has continued to increase following a call for lecturers to return to classes. Classes in the University of Buea witnessed more students yesterday 27 March 2017 following the declaration by the Buea University, (UB) SYNES chapter president, Professor Abangma James Arrey that the strike action they started on 21 November, 2016 should be suspended. The call which he made last Friday urged the teachers and students of the institution to return school while government seeks solutions to the issues raised by the Anglophone teacher trade unions | | | | | | | | | | | | | |  |
|  | | |  | | | | | | | | | | | | | |  |
|  | | | | | | | | | | | | 6 |  | CP |  | 1/21/2023 1:16 AM |  |
|  | | | Le message des évêques du Cameroun délivré à l’issue des travaux de leur 42e Assemblée plénière tenue à Yaoundé. « Au Peuple de Dieu qui est Cameroun, À toutes les personnes de bonne volonté « Je vous exhorte donc, moi le prisonnier du Seigneur, à marcher d'une manière digne de l'appel qui vous a été adressé, vous efforçant de conserver l'unité de l'esprit par le bien de la paix. Il y a un seul corps et un seul Esprit, ... Un seul Dieu le Père de tous, qui est au-dessus de tous, et parmi tous et en tous » (Eph 4, 1 - 6) 1/ Depuis les indépendances, les Camerounais ont reçu le défi de bâtir avec intelligence et sagesse une Nation assumant à la fois leurs héritages aussi bien coloniaux que traditionnels. Cette construction de la Nation n'est pas finie. Elle a connu des soubresauts de toutes natures. | | | | | | | | | | | | | |  |
|  | | |  | | | | | | | | | | | | | |  |
|  | | | | | | | | | | | | | | | | | |
| Reports\\Coding Summary By Source Report | | | | | | | | | | | Page 60 of 146 | | | | | | |
| 1/21/2023 3:45 PM | | | | | | | | | | | | | | | | | |
|  | | | **Classification** |  | **Aggregate** |  | **Coverage** |  | **Number Of Coding References** |  | | **Reference Number** |  | **Coded By Initials** |  | **Modified On** |  |
|  | | | | | | | | | | | | | | | | | |
|  | | | | | | | | | | | | 7 |  | CP |  | 1/21/2023 1:18 AM |  |
|  | | | His call for University resumption was announced at a press conference in Buea last Friday. The South West Regional capital city of Buea was taken by storm last Friday, 24 March, 2017, when the President of the University of Buea chapter of the National Syndicate of Lecturers of Higher Education (French acronym, SYNES), Professor Abangma James Arrey, announced at a press conference that he was calling off the strike action that had kept students out of campus for four months. The press conference was organised at the Chariot Hotel in Buea at 3pm. During the conference, Professor Abangma James Arrey who had been unseen all this while emerged to declare the lecturers’ strike over. Prof. Abangma equally explained to the press some requests they have put to Government to fulfil immediately lest they would consider calling back the strike. | | | | | | | | | | | | | |  |
|  | | |  |
|  | | |  | | | | | | | | | | | | | |  |
|  | | | | | | | | | | | | 8 |  | CP |  | 1/21/2023 1:21 AM |  |
|  | | | Across the six administrative Divisions of the Region, the call is in favour of education. As school bells ring across the South West Region, the various education stakeholders are aware of the various roles expected of each actor to enable school going. Education actors have put hands on the plough to fight the classroom drought witnessed in Anglophone Cameroon since 21 November, 2016. To overturn the tables and assure that this year does not resemble the previous one in ghost schools, Governor Bernard Okalia Bilai set the tone early August with a school resumption inaugural campaign meeting held in his office with all six Senior Divisional Officers of the South West Region in attendance | | | | | | | | | | | | | |  |
|  | | |  | | | | | | | | | | | | | |  |
|  | | | | | | | | | | | | 9 |  | CP |  | 1/21/2023 1:22 AM |  |
|  | | | Below is the press release from the sixth ordinary session of the inter-ministerial committee in charge of examining and proposing solutions to the preoccupations raised by teachers’ trade unions. Chaired by its President, the Minister of Higher Education, Chancellor of the Academic Orders, the interministerial committee in charge of examining and proposing solutions to the preoccupations raised by the teachers Trade Unions had a working session on Tuesday 29th of August 2017 in the conference room of the Ministry of Higher Education beginning at 11:30a.m. The working session was essentially focused on the preparation of the National Education Forum and the problems linked to preoccupations of teachers at the eve of the resumption of the 2017-2018 school year. | | | | | | | | | | | | | |  |
|  | | |  | | | | | | | | | | | | | |  |
|  | | | | | | | | | | | | 10 |  | CP |  | 1/21/2023 1:25 AM |  |
|  | | | They have urged stakeholders across the country to go about business normally, contrary to previous boycott calls. Anationwide industrial strike action which was planned for Monday September 25, 2017, to paralyse the road transport sector has been cancelled. The strike was called off, Saturday September 23, 2017, after road transport workers grouped under the National Syndicates of Road Transport of Cameroon had fruitful discussions with several government officials. They had held separate talks with the Minister of Transport, the Minister of Trade and the Minister of Labour and Social Security. According to a press release sent to our newsroom, the trade unionists said they called off the strike following concrete solutions taken by government to resolve their problems. They noted that after concertations, government promised measures to address their worries. | | | | | | | | | | | | | |  |
|  | | |  |
|  | | |  | | | | | | | | | | | | | |  |
|  | | | | | | | | | | | | 11 |  | CP |  | 1/21/2023 1:49 AM |  |
|  | | | Initially scheduled for 10 am, it was finally at about 3pm that Mimi Mefo was heard at the military court in Douala. Despite the massive mobilization of lawyers and journalists bracing up for what was thought to be the beginning of a long legal battle, the judge took everyone by surprise when he announced the dropping of all the charges against the journalist of Equinoxe television. As early as 9.30 a.m. people started streaming into the premises of the military court but were surprise not to find Mefo’s name on the roll for cases to be heard for the day. This made some people to think the matter had been dropped and this feeling was heightened by the fact that Mimi Mefo herself could not be seen around. However at about 10.30 am, the court registrar came and added Mimi’s name on the roll which was | | | | | | | | | | | | | |  |
|  | | |  |
|  | | |  | | | | | | | | | | | | | |  |
|  | | | | | | | | | | | | 12 |  | CP |  | 1/21/2023 1:55 AM |  |
|  | | | Au terme des travaux samedi dernier à Yaoundé, ils ont appelé la communauté nationale à se mobiliser pour un Cameroun paisible. Mgr Samuel Kleda, archevêque de Douala, président de la Conférence épiscopale nationale du Cameroun (CENC), a présidé du 8 au 14 avril 2018 à Yaoundé, les travaux de la 43e assemblée plénière des évêques du Cameroun. Assemblée à laquelle ont participé, outre les archevêques et évêques, les secrétaires et les membres des 14 commissions épiscopales fonctionnelles à la (CENC). Les travaux qui se sont achevés samedi dernier à Mvolyé ont porté sur l’évaluation de la vie de l’Eglise catholique au Cameroun à travers les rapports de chaque commission. Les évêques ont donné des orientations en lien avec leurs objectifs spécifiques dans la mission de l’Eglise. Au | | | | | | | | | | | | | |  |
|  | | |  | | | | | | | | | | | | | |  |
|  | | | | | | | | | | | | 13 |  | CP |  | 1/21/2023 1:55 AM |  |
|  | | | More than half of those pre selected have already submitted their files for further transmission to Yaounde. As a solution to one of the problems raised by the all anglophone teachers in 2016 the Head of State president Paul Biya ordered for the recruitment of some 1000 bilingual teachers nation wide. After the recruitment process, some 336 candidates were pre-selected from the North West region. At present the candidates have been thronging the regional delegation of Public Service and Administrative Reforms Northwest to signed their draft engagement contract. At the delegations the pre-selected candidates are presenting their relevant documents in conformity with the recruitment. Prior to this exercise, a two man delegation was dispatch from MINFOPRA to supervised the submission and signing exercise. Since Monday January 8 the team has been on their heels as the number of candidates that | | | | | | | | | | | | | |  |
|  | | |  |
|  | | |  | | | | | | | | | | | | | |  |
| Reports\\Coding Summary By Source Report | | | | | | | | | | | Page 61 of 146 | | | | | | |
| 1/21/2023 3:45 PM | | | | | | | | | | | | | | | | | |
|  | | | **Classification** |  | **Aggregate** |  | **Coverage** |  | **Number Of Coding References** |  | | **Reference Number** |  | **Coded By Initials** |  | **Modified On** |  |
|  | | | | | | | | | | | | | | | | | |
|  | | | | | | | | | | | | 14 |  | CP |  | 1/21/2023 1:57 AM |  |
|  | | | Les anciens du Federal Government Secondary School de Mamfe ont lancé un appel samedi dernier à Yaoundé, pour demander aux élèves et aux parents de briser la peur. Le collectif des anciens élèves de la Fédéral Government Secondary School of Mamfe s’est réuni samedi dernier à Yaoundé pour ses 50 ans d'amitié. Derrière cette célébration, s’adosse un contexte. Celui de la crise dans les régions du Nord-Ouest et du SudOuest. En cette veille de rentrée scolaire 2019-2020, les fils et filles de cette partie du pays ont appelé les parents et les élèves à coopérer pour reprendre le chemin de l’école en septembre prochain. «Si nous n’étions pas allés à l’école, alors nous ne serions pas ce que nous sommes aujourd’hui », a expliqué l’honorable Joseph Mbah Ndam, élite. Le collectif ainsi réuni, entend mobiliser des fonds pour accompagner les pouvoirs publics dans la reconstruction des bâtiments administratifs du lycée de Mamfe. Lesquels ont été détruits par les sécessionnistes. Cet accompagnement va également se décliner à travers des appuis aux élèves et étudiants. Notamment avec des fournitures scolaires, des bourses, entre autres. L’éducation étant essentielle pour le développement individuel | | | | | | | | | | | | | |  |
|  | | |  |
|  | | |  | | | | | | | | | | | | | |  |
|  | | | | | | | | | | | | 15 |  | CP |  | 1/21/2023 2:10 AM |  |
|  | | | L’intégralité du propos liminaire du ministre de la Communication lors de son point de presse hier à Yaoundé. « Mesdames, Messieurs les journalistes, Je vous souhaite une chaleureuse bienvenue à cette conférence de presse à laquelle je vous ai conviés et qui porte sur la situation socio-politique prévalant dans des localités des régions du Nord-Ouest et du Sud-Ouest, suite aux revendications formulées par certains avocats et enseignants de première langue d’expression anglaise. Comme vous le savez déjà, afin d’examiner ces revendications et d’y apporter autant que faire se peut les réponses les mieux appropriées, le Premier ministre, chef du gouvernement, a été instruit par Son Excellence Monsieur le président de la République, de mettre en place des cadres de dialogue avec les différentes parties prenantes aux problèmes soulevés, à l’effet d’examiner la pertinence desdits problèmes et de proposer aux instances de décision, les solutions susceptibles d’être envisagées. En ce qui concerne les problèmes soulevés par les enseignants, deux comités ont été mis en place par le Premier ministre, chef du gouvernement. Pour ce qui est des questions soulevées par les Avocats, un autre comité a été créé par le Premier | | | | | | | | | | | | | |  |
|  | | |  |
|  | | |  | | | | | | | | | | | | | |  |
|  | | | | | | | | | | | | 16 |  | CP |  | 1/21/2023 2:11 AM |  |
|  | | | Le communiqué rendu public à l’issue des travaux de leur 40e séminaire annuel tenu à Mamfé. « Du 7 au 14 janvier 2017, les évêques du Cameroun ont tenu au Centre d’accueil de Mamfe leur 40e séminaire annuel dont les travaux ont porté sur l’approfondissement de l’exhortation apostolique « Amoris Laetitia », et l’examen de la mise en application de l’accord-cadre entre le Saint-siège et l’Etat du Cameroun. Les travaux se sont déroulés sous la présidence effective de S.E. Mgr Samuel Kleda, archevêque de Douala et président en exercice de la Conférence épiscopale nationale du Cameroun (CENC). La messe solennelle d’ouverture en la fête de l’épiphanie, le dimanche 8 janvier 2017, a été présidée par Mgr Andrew Nkea, évêque de | | | | | | | | | | | | | |  |
|  | | |  | | | | | | | | | | | | | |  |
|  | | | | | | | | | | | | 17 |  | CP |  | 1/21/2023 2:11 AM |  |
|  | | | Le communiqué rendu public par le président du Comité interministériel ad hoc à la suite de la seconde phase des discussions la semaine dernière. « Le Professeur Ghogomu Paul Mingo, directeur de Cabinet du Premier ministre, chef du gouvernement, président du Comité interministériel ad hoc chargé d’examiner et de proposer des solutions aux préoccupations soulevées par les syndicats des enseignants anglophones, porte à la connaissance de l’opinion nationale et internationale que les travaux de la deuxième session ordinaire dudit Comité se sont tenus à Bamenda les 12 et 13 janvier 2017. Au cours de cette session, les 20 points soulevés par les syndicalistes du sous-système éducatif anglophone ont été examinés avec sérieux, rigueur et objectivité par l’ensemble des participants, dans une atmosphère empreinte de convivialité et de fraternité. Les conclusions de ces travaux techniques sont déjà soumises à Monsieur le Premier ministre, chef du gouvernement, pour la très haute sanction de S.E. Monsieur le président de la République, chef de l’Etat. Toutefois, en dépit de l’analyse méthodique, rigoureuse et exhaustive de l’ensemble des points inscrits à l’ordre du jour, sur proposition des syndicalistes | | | | | | | | | | | | | |  |
|  | | |  |
|  | | |  | | | | | | | | | | | | | |  |
|  | | | | | | | | | | | | 18 |  | CP |  | 1/21/2023 2:15 AM |  |
|  | | | Nord-Ouest et Sud-Ouest: le RDPC appelle à la reprise des cours Le communiqué de presse du Comité central parvenu à notre Rédaction. Le secrétaire général du Comité central du Rassemblement démocratique du peuple camerounais, Monsieur Jean NKUETE, communique: «Depuis le début des tensions sociales qui ont notamment hypothéqué le fonctionnement normal des établissements scolaires et universitaires ainsi que des tribunaux dans les régions du Nord-Ouest et du Sud-Ouest, le Rassemblement démocratique du peuple camerounais n'a cessé de prôner l'apaisement, en appelant à un dialogue positif et pragmatique en vue de trouver des solutions adéquates aux problèmes professionnels posés, dans le respect de la légalité républicaine. A cet effet, de nombreuses missions du parti ont été dépêchées sur le terrain et le | | | | | | | | | | | | | |  |
|  | | |  |
|  | | |  | | | | | | | | | | | | | |  |
|  | | | | | | | | | | | | 19 |  | CP |  | 1/21/2023 2:17 AM |  |
|  | | | Une dizaine d’actes divers ont été distribués vendredi dernier par le ministre d’Etat Laurent Esso aux procureurs généraux de ces deux régions. Cérémonie brève mais pleine de signification vendredi dernier au cabinet du ministre d’Etat, ministre de la Justice, Garde des Sceaux. Entouré de quelques collaborateurs et de Jean Fils Ntamack, procureur général près la Cour d’appel du Centre, Laurent Esso a procédé à la remise d’une dizaine d’actes (versions anglaises) à Njie Albert Nganje, procureur général (PG) près la Cour d’appel du Nord-Ouest et à son collègue Emile Essombè du Sud-Ouest. Il a d’emblée tenu à les féliciter pour la manière dont ils tiennent les différentes juridictions de leur ressort pendant cette période agitée. « Je vous réitère mes félicitations pour votre loyalisme et pour votre loyauté. Je vous demande de veiller toujours à ce que, dans les régions du Nord-Ouest et du Sud-Ouest, et, malgré les turbulences du moment, le pouvoir judiciaire continue d’être respecté ; que le pouvoir judiciaire continue d’affirmer son | | | | | | | | | | | | | |  |
|  | | |  |
|  | | |  | | | | | | | | | | | | | |  |
| Reports\\Coding Summary By Source Report | | | | | | | | | | | Page 62 of 146 | | | | | | |
| 1/21/2023 3:45 PM | | | | | | | | | | | | | | | | | |
|  | | | **Classification** |  | **Aggregate** |  | **Coverage** |  | **Number Of Coding References** |  | | **Reference Number** |  | **Coded By Initials** |  | **Modified On** |  |
|  | | | | | | | | | | | | | | | | | |
|  | | | | | | | | | | | | 20 |  | CP |  | 1/21/2023 2:24 AM |  |
|  | | | Appel lancé ce 31 janvier lors de la présentation des vœux au coordonnateur du Mouvement progressiste à Douala. Jean-Jacques Ekindi, le coordonateur général du Mouvement progressiste (MP), souhaite que l’école reprenne normalement dans le Nord-Ouest et le Sud-Ouest « dans les plus brefs délais. » L’appel a été lancé ce 31 janvier 2017 à Douala, à l’occasion de la présentation des vœux par les cadres de cette formation politique à leur leader. Le parti estime, par la voix de son dirigeant, que la situation doit pouvoir se régler par le dialogue, un « dialogue républicain » pour la réussite duquel chacun doit mettre du sien. Ce que le parti espère ? Des échanges sur le problème actuel organisés dans un « débat fraternel, ouvert, inclusif dans le cadre des institutions de la République. » « Parce que nous savons que la paix et la concorde sont des biens inestimables, parce que nous savons que les mouvements sociaux prennent toujours des formes singulières dont personne n’est maître (…) nous avons l’impérieux devoir de préserver le Cameroun et les Camerounais de toute dérive », ajoutera le leader du MP, en présence de présidents de fédérations du parti, des militants et des sympathisants | | | | | | | | | | | | | |  |
|  | | |  |
|  | | |  | | | | | | | | | | | | | |  |
|  | | | | | | | | | | | | 21 |  | CP |  | 1/21/2023 2:26 AM |  |
|  | | | The meeting also involved Religious authorities, especially the Archbishop of Bamenda and the Moderator of the PCC. I registered their concerns to forward to the government. After the meeting, all of us were on the field to size up the situation and took time off to talk to the youths who were mounting barricades. Again, I invite the population to collectively join in bringing lasting peace to Bamenda. Cameron is a State of Law and while we have taken special measures to keep the City secure, I want to assure all that we will not allow disorder to reign. There is a need for all to give dialogue a chance. | | | | | | | | | | | | | |  |
|  | | |  | | | | | | | | | | | | | |  |
|  | | | | | | | | | | | | 22 |  | CP |  | 1/21/2023 2:29 AM |  |
|  | | | Teacher Trade Unions and the government set agenda towards suspension of strike action. It was a busy weekend for the Prime Minister, Head of Government, Philemon Yang who spent long hours on November 2016 25 and 26, 2016 consulting and encouraging North Westerners on the way forward for nation building without frustrations. Coming on the heels of some disorder on the streets, lawyers and teachers strike actions that rock the capital of the North West region, the consultations, on-the-spot in Bamenda were inclusive and in camera. From the look of things, it is all about the commitment of the government to give a listening ear and dialogue in the process of putting the blocks together for nation building. | | | | | | | | | | | | | |  |
|  | | |  | | | | | | | | | | | | | |  |
|  | | | | | | | | | | | | 23 |  | CP |  | 1/21/2023 2:29 AM |  |
|  | | | After a fruitful exchange with various opinion leaders in Bamenda, the Prime Minister’s presence left behind a peaceful town. The inhabitants of the North West Regional capital, Bamenda woke up to a peaceful day yesterday Sunday, 27 November 2016. This follows two days of intense discussions between Prime Minister Philemon Yang and opinion leaders such as traditional rulers, leaders of lawyers and teachers’ trade unions that have been at the forefront of a sit-in action which almost went out of hand. Churches in town functioned normally as Christians worshipped without any hindrance. Those who wanted to carry out purchases of certain basic necessities in town were able to do so without any problems. The dissuasive presence of security men deployed at strategic places in town had no negative effects on the population | | | | | | | | | | | | | |  |
|  | | |  |
|  | | |  | | | | | | | | | | | | | |  |
|  | | | | | | | | | | | | 24 |  | CP |  | 1/21/2023 2:37 AM |  |
|  | | | Communiqué By NW Elite, Senators And Members Of The National Assembly Calling For Peace And Resumption Of Schools In The NW Region Mindful of government resolve to give commensurate attention to teachers’ and lawyers’ grievances through constructive dialogue as testified by the Head of State, sending the Prime Minister, Head of Government to dialogue with Teachers, Lawyers, and Civil Society in Bamenda on 25 and 26 November 2016, Mindful of the first meeting of the Inter-Ministerial Committee presided over by the Minister of Higher Education to look into teachers’ grievances at the end of which a comprehensive recommendation arrived at was submitted for consideration by Government, Mindful of the special meeting chaired by the Minister of State, Minister of Justice and Keeper of the Seals to examine and dialogue with Members of the Bar Council that was held on | | | | | | | | | | | | | |  |
|  | | |  |
|  | | |  | | | | | | | | | | | | | |  |
|  | | | | | | | | | | | | 25 |  | CP |  | 1/21/2023 2:39 AM |  |
|  | | | Après les mouvements d’étudiants la semaine dernière, l’administration a engagé le dialogue et pris des décisions qui ont ramené le calme. En début de semaine dernière, l’université de Buea a été secouée par les revendications d’étudiants. Ces derniers ont manifesté leur mécontentement à cause du non-paiement de la prime spéciale (50 000F) octroyée par le chef de l’Etat, le paiement d’une amende de 10 000F pour « inscription tardive en ligne », entre autres. Après un dialogue fructueux, l’administration de l’université a accédé aux désidératas des étudiants. En effet, il a été procédé à la suppression de la pénalité de 10 000F imputée à tous les étudiants en retard dans le paiement des frais universitaires. Un communiqué signé du Vice-chancellor, le Pr Nalova Lyonga, a formellement mis fin à cette pratique | | | | | | | | | | | | | |  |
|  | | |  |
|  | | |  | | | | | | | | | | | | | |  |
|  | | | | | | | | | | | | | | | | | |
| Reports\\Coding Summary By Source Report | | | | | | | | | | | Page 63 of 146 | | | | | | |
| 1/21/2023 3:45 PM | | | | | | | | | | | | | | | | | |
|  | | | **Classification** |  | **Aggregate** |  | **Coverage** |  | **Number Of Coding References** |  | | **Reference Number** |  | **Coded By Initials** |  | **Modified On** |  |
|  | | | | | | | | | | | | | | | | | |
|  | | | | | | | | | | | | 26 |  | CP |  | 1/21/2023 2:39 AM |  |
|  | | | North West Governor, Adolphe Lele Lafrique on the state of the region on December 5, 2016. Cold you size-up events that disturbed regular business activities in Bamenda on December, 5, and 2016? First of all, let me salute the concern of all who are working toward lasting peace in the North West region. We have been constantly on the field, sensitizing various stakeholders and the population. We have chaired meetings and met traditional leaders to help the administration restore peace. Those moves have yielded fruits and the situation has been stabilized since the disorder of November 21, 2016 until Monday December 5, 2016 when some incidents made some of our Security Forces to clash with some vandals who attempted to prevent traders and Commercial motorcycle riders from work. I take this opportunity to salute the professionalism of the Security Forces in handling the situation. Over the weekend, the SDO of Mezam Division sent a message to the population of Bamenda to carry out their activities as usual because there are security measures to protect people and their property. This is to say that the situation in Bamenda is globally calm even if some shops were closed. I therefore appeal to the population to mobilize and prevent hijackers from attempts to destroy their tranquility and | | | | | | | | | | | | | |  |
|  | | |  |
|  | | |  | | | | | | | | | | | | | |  |
|  | | | | | | | | | | | | 27 |  | CP |  | 1/21/2023 2:41 AM |  |
|  | | | Déclaration de la Commission nationale des Droits de l’Homme suite aux évènements récents relatifs aux violations des droits de l’Homme au Cameroun. Dans le cadre des évènements récents ayant marqué l’actualité au Cameroun ces deux derniers mois, notamment : • La grève des avocats anglophones dès le 11 octobre 2016; • La grève des syndicats des enseignants du système anglophone depuis le 21 novembre 2016 ; • Les dénonciations verbales du nommé MANCHO BBC à l’attention du Délégué régional de la communauté urbaine de Bamenda le 21 novembre 2016; et • La grève des étudiants de l’Université de Buea qui a commencé le 28 novembre 2016. La CNDHL est préoccupée par le cas des violations des droits de l’Homme tels que : le droit à la vie, le droit de ne pas être soumis à la torture, traitement cruel, inhumain ou dégradant, le droit à l’éducation, l’accès à la justice, et la liberté d’expression. | | | | | | | | | | | | | |  |
|  | | |  |
|  | | |  | | | | | | | | | | | | | |  |
|  | | | | | | | | | | | | 28 |  | CP |  | 1/21/2023 2:43 AM |  |
|  | | | The CPDM Scribe was speaking at the Buea ceremonial ground during a grand party rally called to quell Lawyers and Teachers’ strike action. The 31 Sections of the governing Cameroon People’s Democratic movement (CPDM) from the six Divisions of the South West Region mobilised their militants to the ceremonial grounds in Buea yesterday, December 6, 2016 to call for peace, unity and territorial integrity following the Lawyers and Teachers strike action that has grounded schooling activities in the area for the past two weeks. At the Bongo Square, the Secretary General of the CPDM Central Committee, Jean Nkuete, addressed the mammoth crowd thanking them for turning out marvelously within a short notice. Mr. Nkuete explained that they were meeting in a particular context when Lawyers and Teachers grievances had been given a deformed image by the social network leading to an outburst of violence and political manipulations. He called on the South West to show their true face of a Region that contributes | | | | | | | | | | | | | |  |
|  | | |  |
|  | | |  | | | | | | | | | | | | | |  |
|  | | | | | | | | | | | | 29 |  | CP |  | 1/21/2023 2:44 AM |  |
|  | | | Professor Paul Ghogomu Mingo had a meeting with the striking teachers leaders. On the strength of Prime Ministerial Order No. 125/CAB/PM of 29 November 2016, the Chairman of the Adhoc Inter-ministerial Committee created to examine concerns raised by striking Anglophone teachers, the Minister, Director of Cabinet at the Prime Minister’s Office Professor Paul Ghogomu Mingo met with the leaders of the teachers trade unions in Bamenda on December 6,2016. After long hours, it emerged from the closed door session that the Chairman clarified some concerns that featured on the Order creating the Ad hoc Inter-ministerial Committee. One of the teachers Union leaders and Executive Secretary of the Cameroon Teachers Trade Union (CATTU), Wilfred Tasang however, told Cameroon Tribune that an impasse over the concrete way forward to solve some concerns raised, failed to move discussions forward and the strike action continues while waiting for the Ad hoc Inter-ministerial | | | | | | | | | | | | | |  |
|  | | |  |
|  | | |  | | | | | | | | | | | | | |  |
|  | | | | | | | | | | | | 30 |  | CP |  | 1/21/2023 2:44 AM |  |
[truncated: 503,510 more chars]
